# Supplementary material for: The DevTox Germ Layer Reporter Platform: An Assay Adaptation of the Human Pluripotent Stem Cell Test
Source: MDPI journal article supplement (doi:10.3390/toxics10070392), 2022-07-13
Supplement: s1 [file s1]

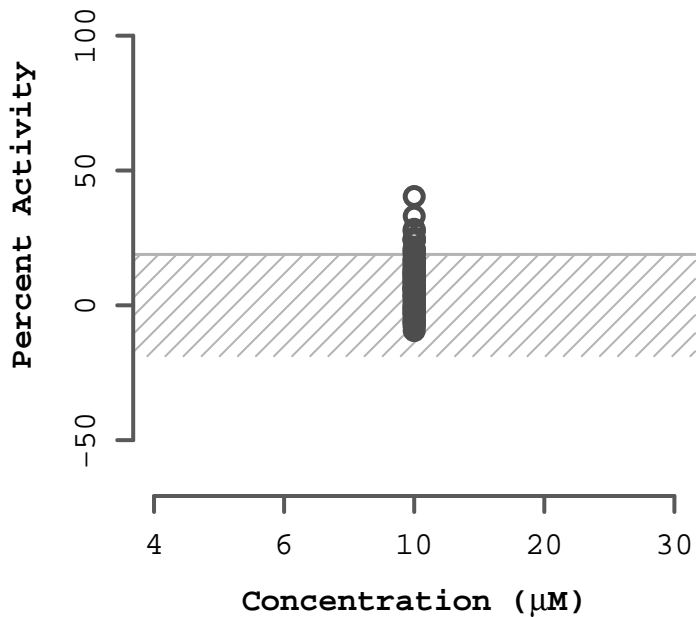

ASSAY: AEID3098 (CCTE\_Deisenroth\_DEVTOX\_RUES2-GLR\_Cel.

NAME: SB-431542

CHID: 42693 CASRN: 301836-41-9

SPID(S): ES211\_56\_56

M4ID: 42676199

HILL MODEL: Not applicable.

GAIN-LOSS MODEL: Not applicable.

|       | CNST | HILL | GNLS |
|-------|------|------|------|
| AIC:  | NA   | NA   | NA   |
| PROB: | NA   | NA   | NA   |
| RMSE: | NA   | NA   | NA   |

MAX\_MEAN: 8.7 MAX\_MED: 8.21 BMAD: 6.29

COFF: 18.9 HIT-CALL: -1 FITC: 2 ACTP: NA

FLAGS:

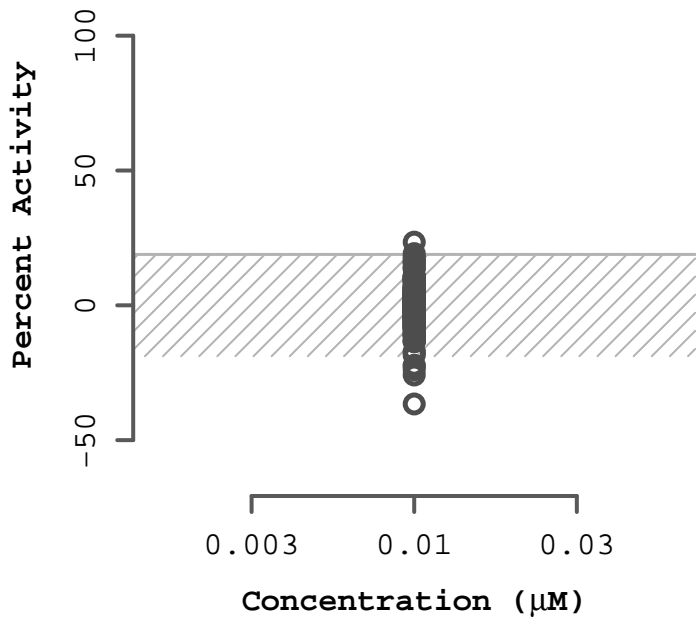

ASSAY: AEID3098 (CCTE\_Deisenroth\_DEVTOX\_RUES2-GLR\_Cel.

NAME: DMSO (spid not in DB)

CHID: NA CASRN: NA

SPID(S): DMSO

M4ID: 42676201

HILL MODEL: Not applicable.

GAIN-LOSS MODEL: Not applicable.

|       | CNST | HILL | GNLS |
|-------|------|------|------|
| AIC:  | NA   | NA   | NA   |
| PROB: | NA   | NA   | NA   |
| RMSE: | NA   | NA   | NA   |

MAX\_MEAN: -0.368 MAX\_MED: 0 BMAD: 6.29

COFF: 18.9 HIT-CALL: -1 FITC: 2 ACTP: NA

FLAGS:

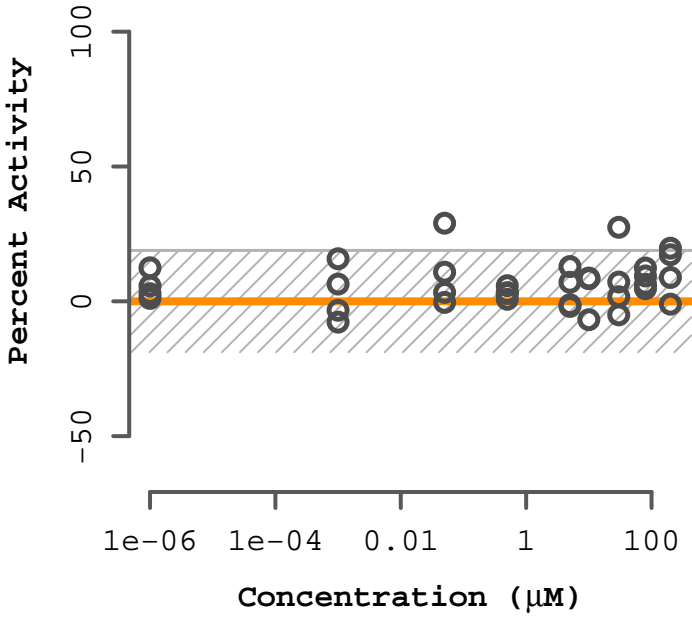

ASSAY: AEID3098 (CCTE\_Deisenroth\_DEVTOX\_RUES2-GLR\_Cel.

NAME: Acetaminophen  
CHID: 20006 CASRN: 103-90-2  
SPID(S): ES211\_9\_9  
M4ID: 42676223

HILL MODEL: Not applicable.

GAIN-LOSS MODEL: Not applicable.

|       |        |      |      |
|-------|--------|------|------|
|       | CNST   | HILL | GNLS |
| AIC:  | 272.43 | NA   | NA   |
| PROB: | 1      | NA   | NA   |
| RMSE: | 10.5   | NA   | NA   |

MAX\_MEAN: 11.2      MAX\_MED: 13.1      BMAD: 6.29

COFF: 18.9      HIT-CALL: 0      FITC: 4      ACTP: 0

FLAGS:

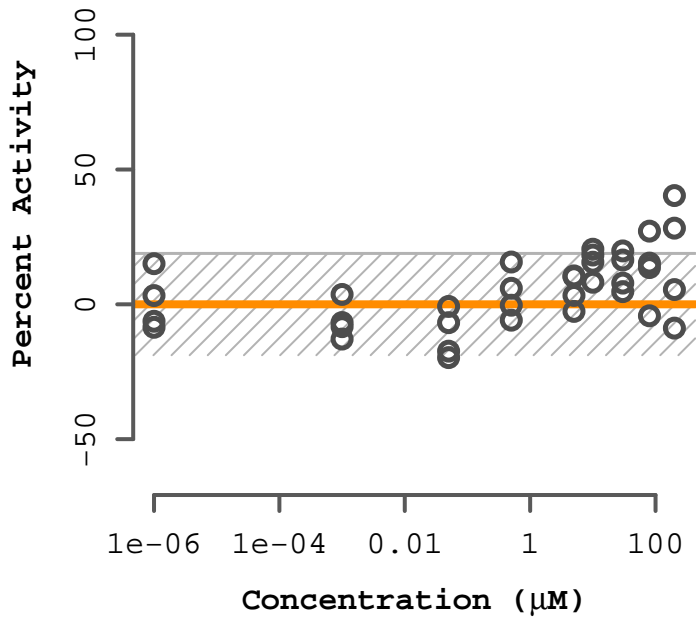

ASSAY: AEID3098 (CCTE\_Deisenroth\_DEVTOX\_RUES2-GLR\_Cel.

NAME: Acrylamide

CHID: 20027 CASRN: 79-06-1

SPID(S): ES211\_10\_10

M4ID: 42676219

HILL MODEL: Not applicable.

GAIN-LOSS MODEL: Not applicable.

|       |        |      |      |
|-------|--------|------|------|
|       | CNST   | HILL | GNLS |
| AIC:  | 297.76 | NA   | NA   |
| PROB: | 1      | NA   | NA   |
| RMSE: | 14.39  | NA   | NA   |

MAX\_MEAN: 16.3 MAX\_MED: 17 BMAD: 6.29

COFF: 18.9 HIT-CALL: 0 FITC: 4 ACTP: 0

FLAGS:

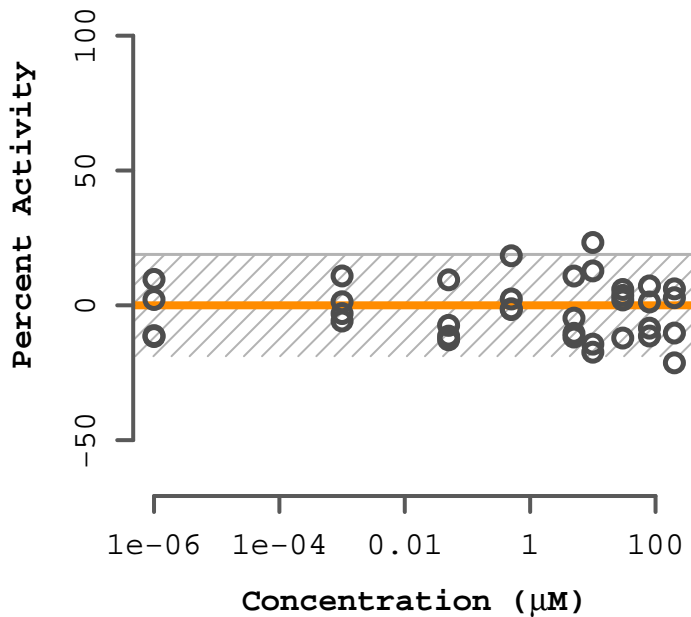

ASSAY: AEID3098 (CCTE\_Deisenroth\_DEVTOX\_RUES2-GLR\_Cel.

NAME: Aspirin

CHID: 20108 CASRN: 50-78-2

SPID(S): ES211\_15\_15

M4ID: 42676239

HILL MODEL: Not applicable.

GAIN-LOSS MODEL: Not applicable.

|       |        |      |      |
|-------|--------|------|------|
|       | CNST   | HILL | GNLS |
| AIC:  | 277.55 | NA   | NA   |
| PROB: | 1      | NA   | NA   |
| RMSE: | 10.5   | NA   | NA   |

MAX\_MEAN: 4.48 MAX\_MED: 2.85 BMAD: 6.29

COFF: 18.9 HIT-CALL: 0 FITC: 4 ACTP: 0

FLAGS:

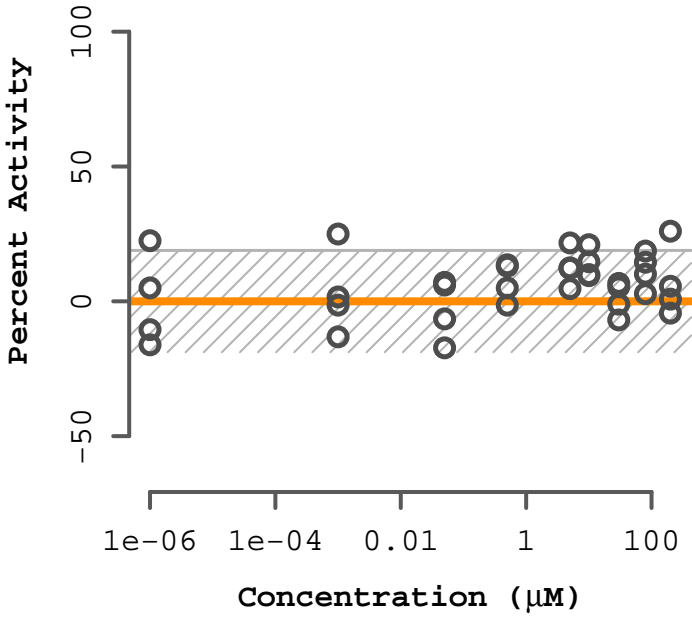

ASSAY: AEID3098 (CCTE\_Deisenroth\_DEVTOX\_RUES2-GLR\_Cel.

NAME: Boric acid (H3BO3)  
CHID: 20194 CASRN: 10043-35-3  
SPID(S): ES211\_17\_17  
M4ID: 42676191

HILL MODEL: Not applicable.

GAIN-LOSS MODEL: Not applicable.

|       | CNST   | HILL | GNLS |
|-------|--------|------|------|
| AIC:  | 289.92 | NA   | NA   |
| PROB: | 1      | NA   | NA   |
| RMSE: | 12.55  | NA   | NA   |

MAX\_MEAN: 13.8 MAX\_MED: 12.3 BMAD: 6.29

COFF: 18.9 HIT-CALL: 0 FITC: 4 ACTP: 0

FLAGS:

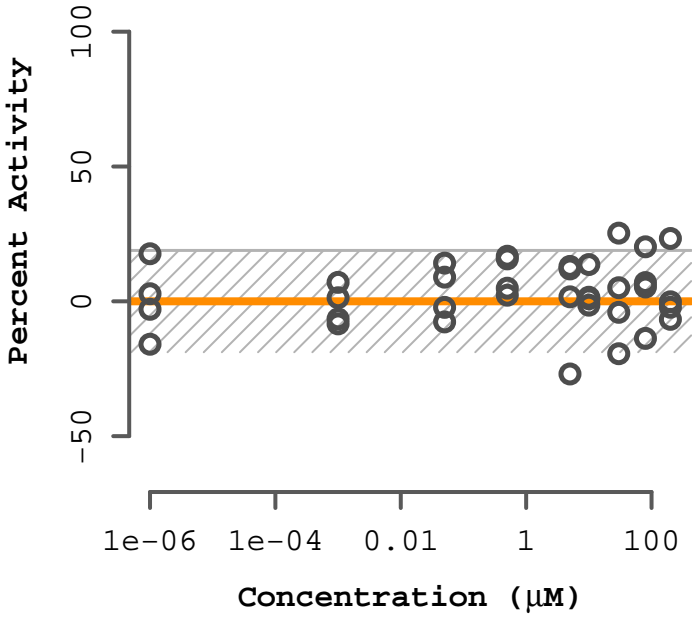

ASSAY: AEID3098 (CCTE\_Deisenroth\_DEVTOX\_RUES2-GLR\_Cel.

NAME: Caffeine  
CHID: 20232 CASRN: 58-08-2  
SPID(S): ES211\_20\_20  
M4ID: 42676214

HILL MODEL: Not applicable.

GAIN-LOSS MODEL: Not applicable.

|       |        |      |      |
|-------|--------|------|------|
|       | CNST   | HILL | GNLS |
| AIC:  | 285.32 | NA   | NA   |
| PROB: | 1      | NA   | NA   |
| RMSE: | 12.03  | NA   | NA   |

MAX\_MEAN: 9.91      MAX\_MED: 10.3      BMAD: 6.29

COFF: 18.9      HIT-CALL: 0      FITC: 4      ACTP: 0

FLAGS:

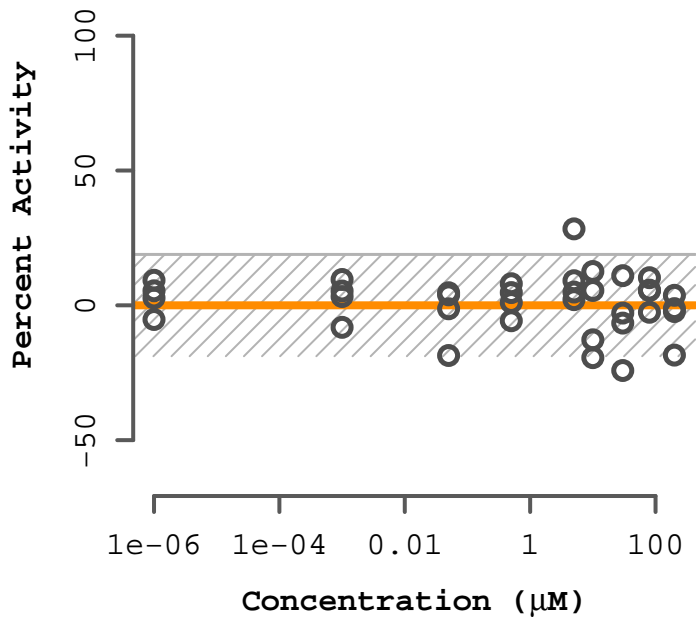

ASSAY: AEID3098 (CCTE\_Deisenroth\_DEVTOX\_RUES2-GLR\_Cel.

NAME: Ethylene glycol

CHID: 20597 CASRN: 107-21-1

SPID(S): ES211\_32\_32

M4ID: 42676198

HILL MODEL: Not applicable.

GAIN-LOSS MODEL: Not applicable.

|       |        |      |      |
|-------|--------|------|------|
|       | CNST   | HILL | GNLS |
| AIC:  | 271.02 | NA   | NA   |
| PROB: | 1      | NA   | NA   |
| RMSE: | 10.26  | NA   | NA   |

MAX\_MEAN: 11.1 MAX\_MED: 7.04 BMAD: 6.29

COFF: 18.9 HIT-CALL: 0 FITC: 4 ACTP: 0

FLAGS:



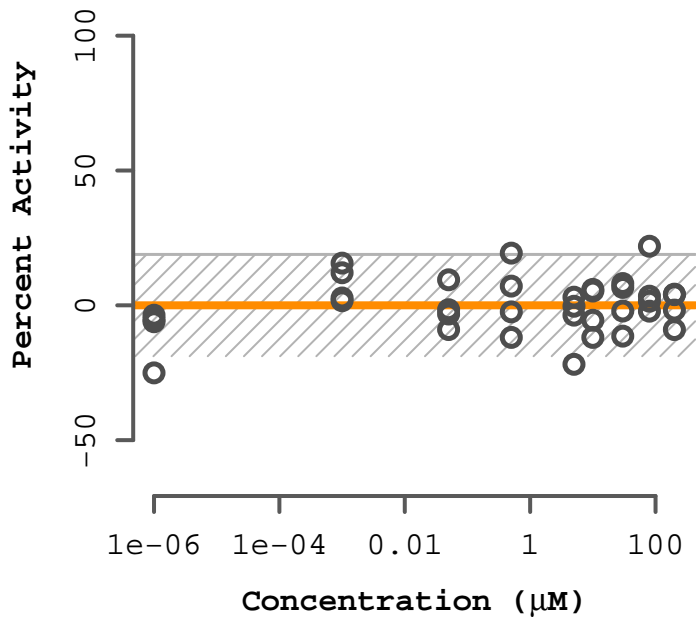

ASSAY: AEID3098 (CCTE\_Deisenroth\_DEVTOX\_RUES2-GLR\_Cel.

NAME: Isoniazid

CHID: 20755 CASRN: 54-85-3

SPID(S): ES211\_39\_39

M4ID: 42676217

HILL MODEL: Not applicable.

GAIN-LOSS MODEL: Not applicable.

|       |        |      |      |
|-------|--------|------|------|
|       | CNST   | HILL | GNLS |
| AIC:  | 267.93 | NA   | NA   |
| PROB: | 1      | NA   | NA   |
| RMSE: | 9.8    | NA   | NA   |

MAX\_MEAN: 8.05 MAX\_MED: 7.42 BMAD: 6.29

COFF: 18.9 HIT-CALL: 0 FITC: 4 ACTP: 0

FLAGS:

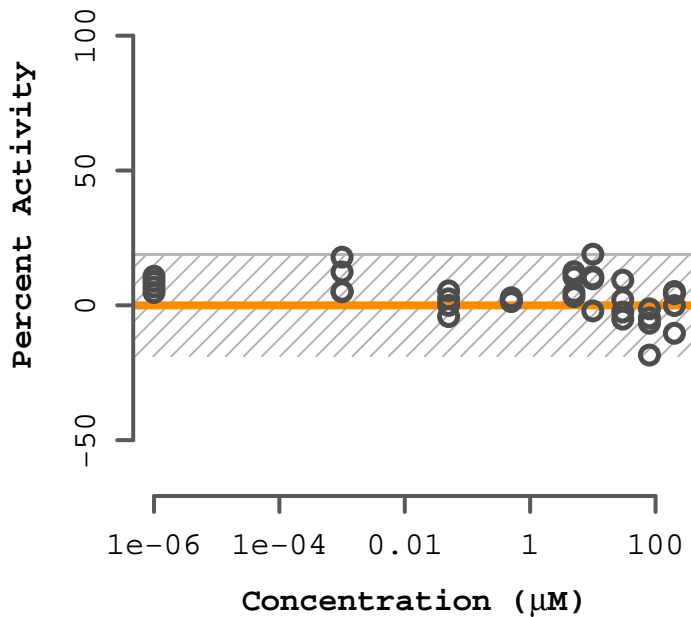

ASSAY: AEID3098 (CCTE\_Deisenroth\_DEVTOX\_RUES2-GLR\_Cel.

NAME: Methyl dopa sesquihydrate

CHID: 20863 CASRN: 41372-08-1

SPID(S): ES211\_46\_46

M4ID: 42676184

HILL MODEL: Not applicable.

GAIN-LOSS MODEL: Not applicable.

|       |        |      |      |
|-------|--------|------|------|
|       | CNST   | HILL | GNLS |
| AIC:  | 257.13 | NA   | NA   |
| PROB: | 1      | NA   | NA   |
| RMSE: | 8.19   | NA   | NA   |

MAX\_MEAN: 10.1 MAX\_MED: 10.2 BMAD: 6.29

COFF: 18.9 HIT-CALL: 0 FITC: 4 ACTP: 0

FLAGS:

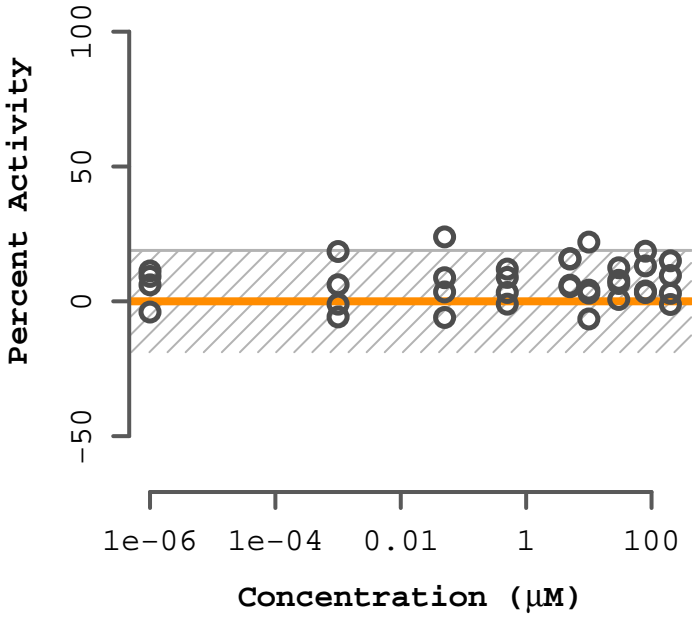

ASSAY: AEID3098 (CCTE\_Deisenroth\_DEVTOX\_RUES2-GLR\_Cel.

NAME: Nicotinic acid

CHID: 20932 CASRN: 59-67-6

SPID(S): ES211\_48\_48

M4ID: 42676238

HILL MODEL: Not applicable.

GAIN-LOSS MODEL: Not applicable.

|       |        |      |      |
|-------|--------|------|------|
|       | CNST   | HILL | GNLS |
| AIC:  | 274.93 | NA   | NA   |
| PROB: | 1      | NA   | NA   |
| RMSE: | 10.36  | NA   | NA   |

MAX\_MEAN: 10.7 MAX\_MED: 10.8 BMAD: 6.29

COFF: 18.9 HIT-CALL: 0 FITC: 4 ACTP: 0

FLAGS:

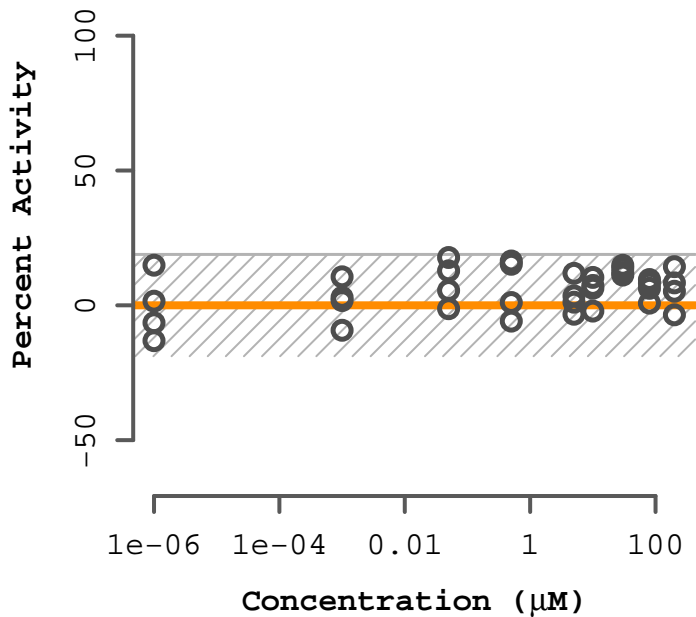

ASSAY: AEID3098 (CCTE\_Deisenroth\_DEVTOX\_RUES2-GLR\_Cel.

NAME: 1,2-Propylene glycol

CHID: 21206 CASRN: 57-55-6

SPID(S): ES211\_1\_1

M4ID: 42676196

HILL MODEL: Not applicable.

GAIN-LOSS MODEL: Not applicable.

|       |        |      |      |
|-------|--------|------|------|
|       | CNST   | HILL | GNLS |
| AIC:  | 271.37 | NA   | NA   |
| PROB: | 1      | NA   | NA   |
| RMSE: | 9.53   | NA   | NA   |

MAX\_MEAN: 13 MAX\_MED: 13 BMAD: 6.29

COFF: 18.9 HIT-CALL: 0 FITC: 4 ACTP: 0

FLAGS:

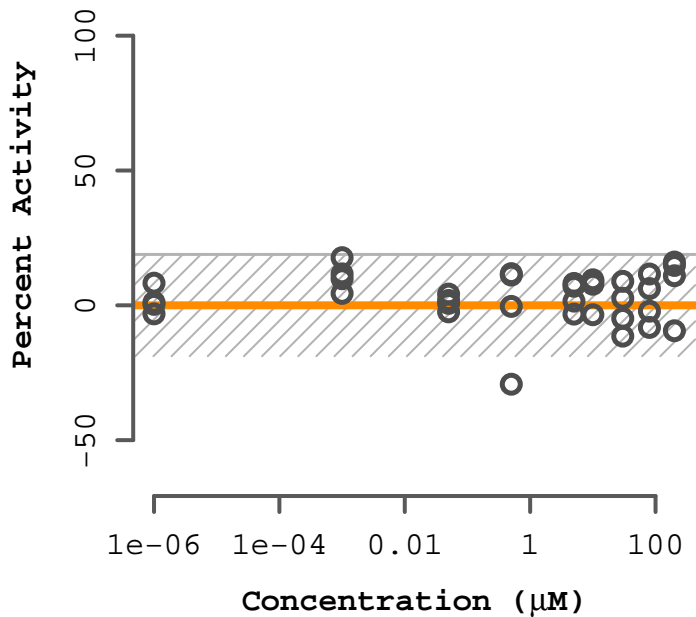

ASSAY: AEID3098 (CCTE\_Deisenroth\_DEVTOX\_RUES2-GLR\_Cel.

NAME: 6-Propyl-2-thiouracil

CHID: 21209 CASRN: 51-52-5

SPID(S): ES211\_8\_8

M4ID: 42676182

HILL MODEL: Not applicable.

GAIN-LOSS MODEL: Not applicable.

|       |        |      |      |
|-------|--------|------|------|
|       | CNST   | HILL | GNLS |
| AIC:  | 268.35 | NA   | NA   |
| PROB: | 1      | NA   | NA   |
| RMSE: | 9.63   | NA   | NA   |

MAX\_MEAN: 10.9 MAX\_MED: 12.9 BMAD: 6.29

COFF: 18.9 HIT-CALL: 0 FITC: 4 ACTP: 0

FLAGS:

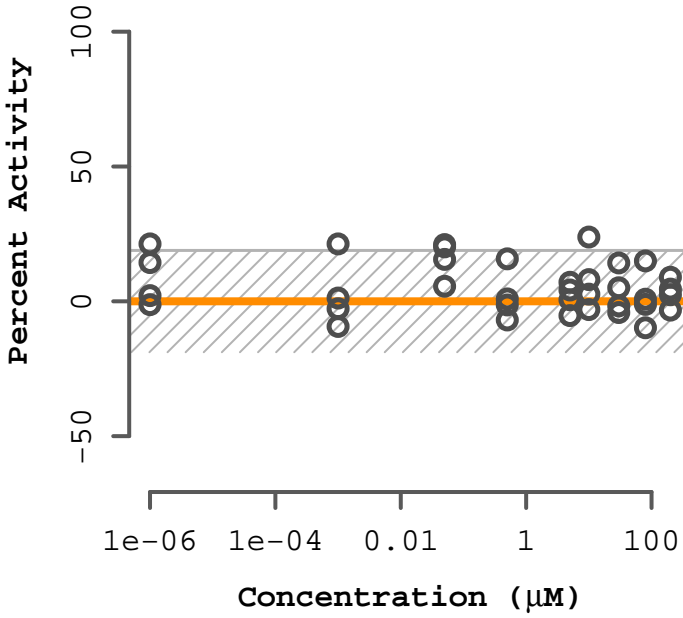

ASSAY: AEID3098 (CCTE\_Deisenroth\_DEVTOX\_RUES2-GLR\_Cel.

NAME: Saccharin

CHID: 21251 CASRN: 81-07-2

SPID(S): ES211\_54\_54

M4ID: 42676229

HILL MODEL: Not applicable.

GAIN-LOSS MODEL: Not applicable.

|       |        |      |      |
|-------|--------|------|------|
|       | CNST   | HILL | GNLS |
| AIC:  | 274.86 | NA   | NA   |
| PROB: | 1      | NA   | NA   |
| RMSE: | 10.64  | NA   | NA   |

MAX\_MEAN: 15.6 MAX\_MED: 17.9 BMAD: 6.29

COFF: 18.9 HIT-CALL: 0 FITC: 4 ACTP: 0

FLAGS:

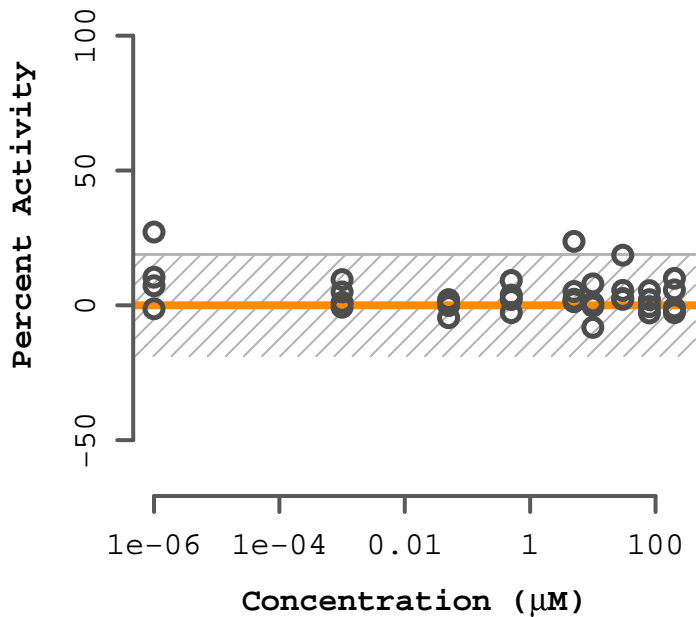

ASSAY: AEID3098 (CCTE\_Deisenroth\_DEVTOX\_RUES2-GLR\_Cel.

NAME: Sulfasalazine

CHID: 21256 CASRN: 599-79-1

SPID(S): ES211\_59\_59

M4ID: 42676240

HILL MODEL: Not applicable.

GAIN-LOSS MODEL: Not applicable.

|       |        |      |      |
|-------|--------|------|------|
|       | CNST   | HILL | GNLS |
| AIC:  | 247.51 | NA   | NA   |
| PROB: | 1      | NA   | NA   |
| RMSE: | 8.26   | NA   | NA   |

MAX\_MEAN: 10.9 MAX\_MED: 8.86 BMAD: 6.29

COFF: 18.9 HIT-CALL: 0 FITC: 4 ACTP: 0

FLAGS:

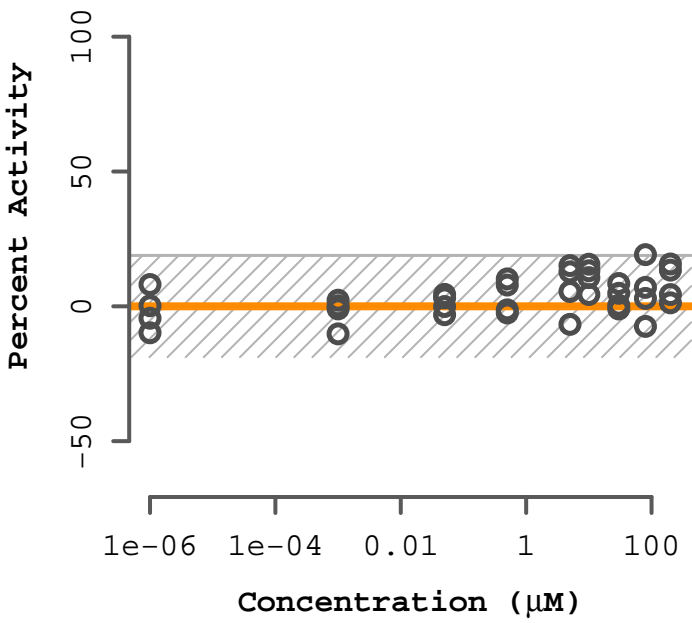

ASSAY: AEID3098 (CCTE\_Deisenroth\_DEVTOX\_RUES2-GLR\_Cel.

NAME: Dimethyl phthalate

CHID: 22455 CASRN: 131-11-3

SPID(S): ES211\_30\_30

M4ID: 42676243

HILL MODEL: Not applicable.

GAIN-LOSS MODEL: Not applicable.

|       |        |      |      |
|-------|--------|------|------|
|       | CNST   | HILL | GNLS |
| AIC:  | 260.09 | NA   | NA   |
| PROB: | 1      | NA   | NA   |
| RMSE: | 8.42   | NA   | NA   |

MAX\_MEAN: 11 MAX\_MED: 11.9 BMAD: 6.29

COFF: 18.9 HIT-CALL: 0 FITC: 4 ACTP: 0

FLAGS:



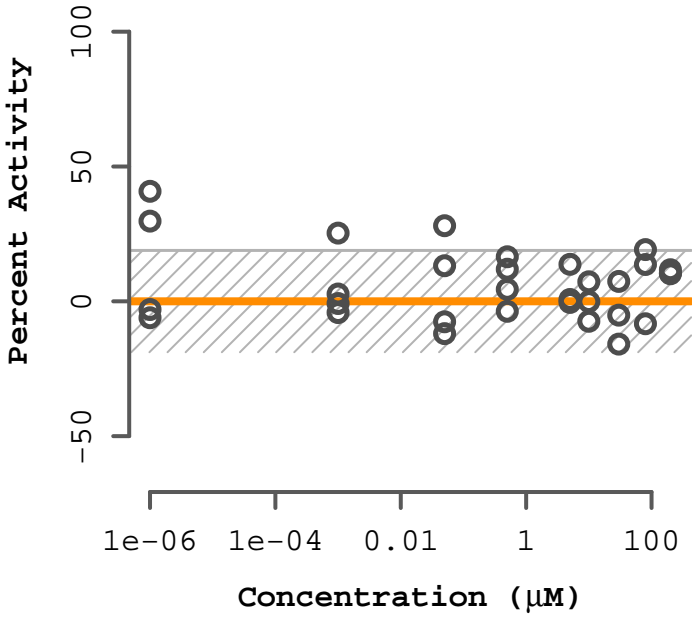

ASSAY: AEID3098 (CCTE\_Deisenroth\_DEVTOX\_RUES2-GLR\_Cel.

NAME: Folic acid

CHID: 22519 CASRN: 59-30-3

SPID(S): ES211\_33\_33

M4ID: 42676206

HILL MODEL: Not applicable.

GAIN-LOSS MODEL: Not applicable.

|       |        |      |      |
|-------|--------|------|------|
|       | CNST   | HILL | GNLS |
| AIC:  | 255.12 | NA   | NA   |
| PROB: | 1      | NA   | NA   |
| RMSE: | 14.46  | NA   | NA   |

MAX\_MEAN: 15.4 MAX\_MED: 13.7 BMAD: 6.29

COFF: 18.9 HIT-CALL: 0 FITC: 4 ACTP: 0

FLAGS:

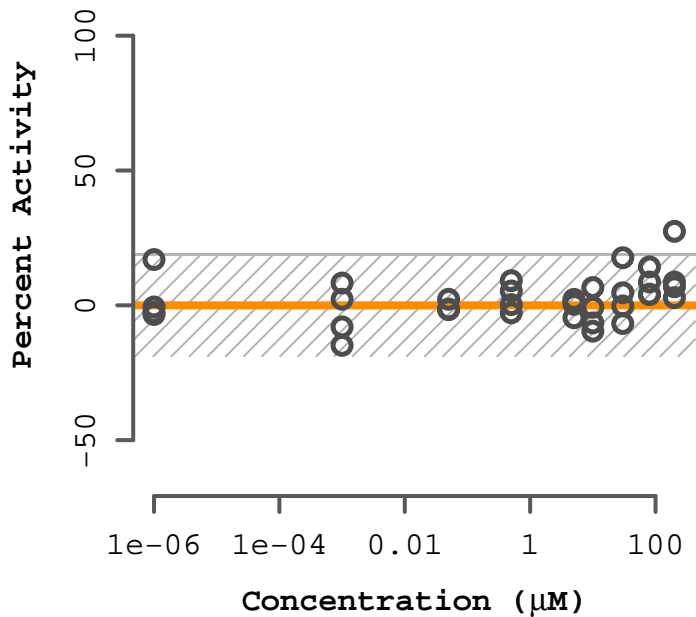

ASSAY: AEID3098 (CCTE\_Deisenroth\_DEVTOX\_RUES2-GLR\_Cel.

NAME: Acyclovir

CHID: 22556 CASRN: 59277-89-3

SPID(S): ES211\_12\_12

M4ID: 42676216

HILL MODEL: Not applicable.

GAIN-LOSS MODEL: Not applicable.

|       |        |      |      |
|-------|--------|------|------|
|       | CNST   | HILL | GNLS |
| AIC:  | 254.61 | NA   | NA   |
| PROB: | 1      | NA   | NA   |
| RMSE: | 8.47   | NA   | NA   |

MAX\_MEAN: 11.5 MAX\_MED: 7.77 BMAD: 6.29

COFF: 18.9 HIT-CALL: 0 FITC: 4 ACTP: 0

FLAGS:

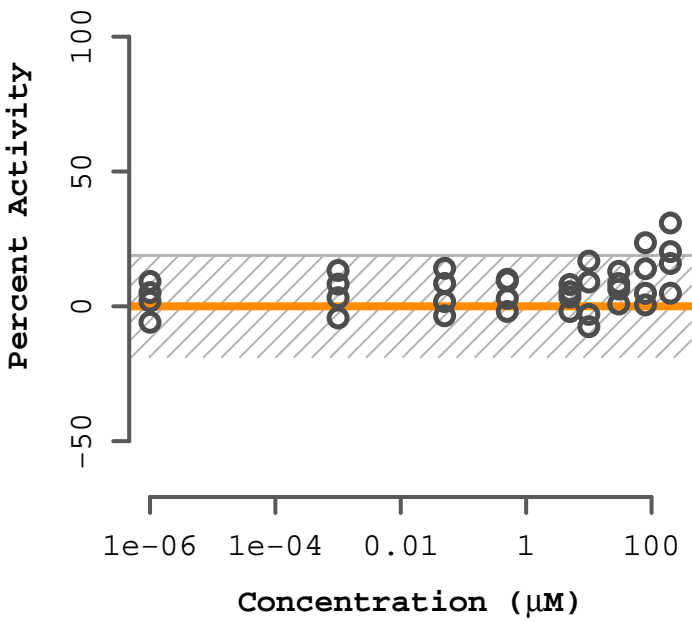

ASSAY: AEID3098 (CCTE\_Deisenroth\_DEVTOX\_RUES2-GLR\_Cel.

NAME: Valproic acid

CHID: 23733 CASRN: 99-66-1

SPID(S): ES211\_63\_63

M4ID: 42676218

HILL MODEL: Not applicable.

GAIN-LOSS MODEL: Not applicable.

|       | CNST   | HILL | GNLS |
|-------|--------|------|------|
| AIC:  | 275.23 | NA   | NA   |
| PROB: | 1      | NA   | NA   |
| RMSE: | 10.75  | NA   | NA   |

|              |               |            |
|--------------|---------------|------------|
| MAX_MEAN: 18 | MAX_MED: 18.1 | BMAD: 6.29 |
|--------------|---------------|------------|

|            |             |         |         |
|------------|-------------|---------|---------|
| COFF: 18.9 | HIT-CALL: 0 | FITC: 4 | ACTP: 0 |
|------------|-------------|---------|---------|

FLAGS:

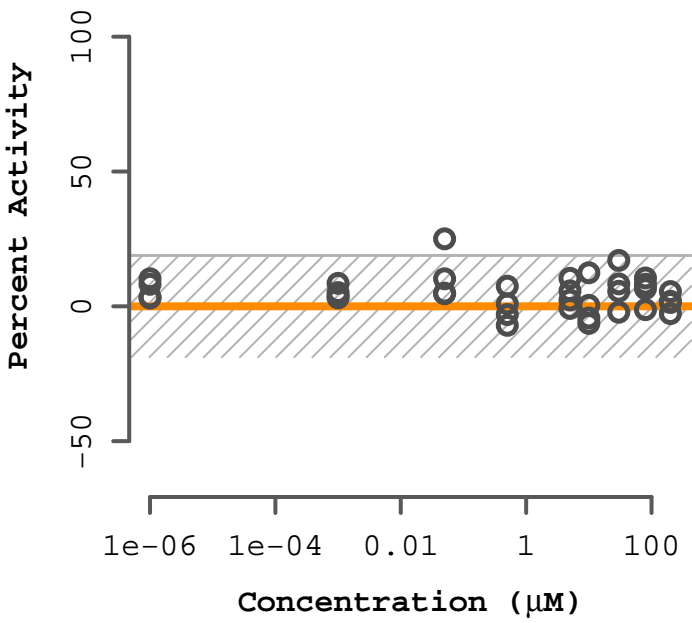

ASSAY: AEID3098 (CCTE\_Deisenroth\_DEVTOX\_RUES2-GLR\_Cel.

NAME: D-Camphor

CHID: 24721 CASRN: 464-49-3

SPID(S): ES211\_27\_27

M4ID: 42676234

HILL MODEL: Not applicable.

GAIN-LOSS MODEL: Not applicable.

|       |        |      |      |
|-------|--------|------|------|
|       | CNST   | HILL | GNLS |
| AIC:  | 252.32 | NA   | NA   |
| PROB: | 1      | NA   | NA   |
| RMSE: | 7.87   | NA   | NA   |

MAX\_MEAN: 11.2 MAX\_MED: 7.56 BMAD: 6.29

COFF: 18.9 HIT-CALL: 0 FITC: 4 ACTP: 0

FLAGS:

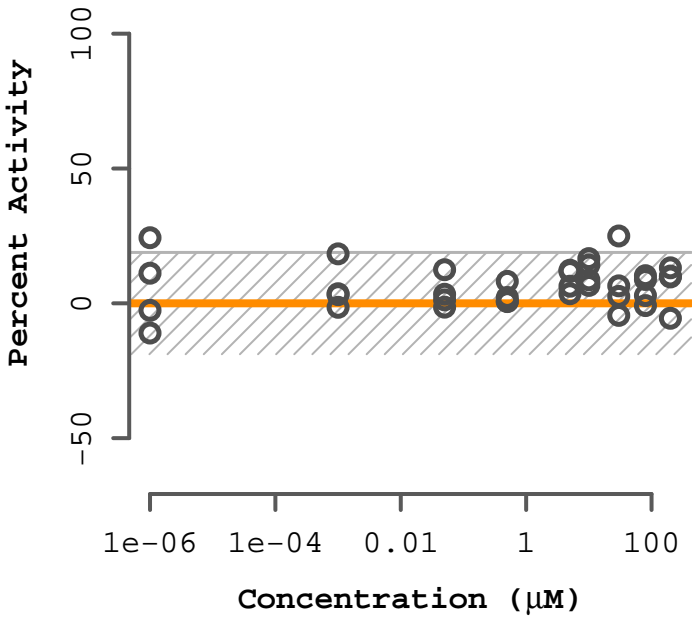

ASSAY: AEID3098 (CCTE\_Deisenroth\_DEVTOX\_RUES2-GLR\_Cel.

NAME: Salicylic acid  
CHID: 26368 CASRN: 69-72-7  
SPID(S): ES211\_55\_55  
M4ID: 42676197

HILL MODEL: Not applicable.

GAIN-LOSS MODEL: Not applicable.

|       |       |      |      |
|-------|-------|------|------|
|       | CNST  | HILL | GNLS |
| AIC:  | 272.2 | NA   | NA   |
| PROB: | 1     | NA   | NA   |
| RMSE: | 10.11 | NA   | NA   |

MAX\_MEAN: 11.6      MAX\_MED: 11.5      BMAD: 6.29

COFF: 18.9      HIT-CALL: 0      FITC: 4      ACTP: 0

FLAGS:

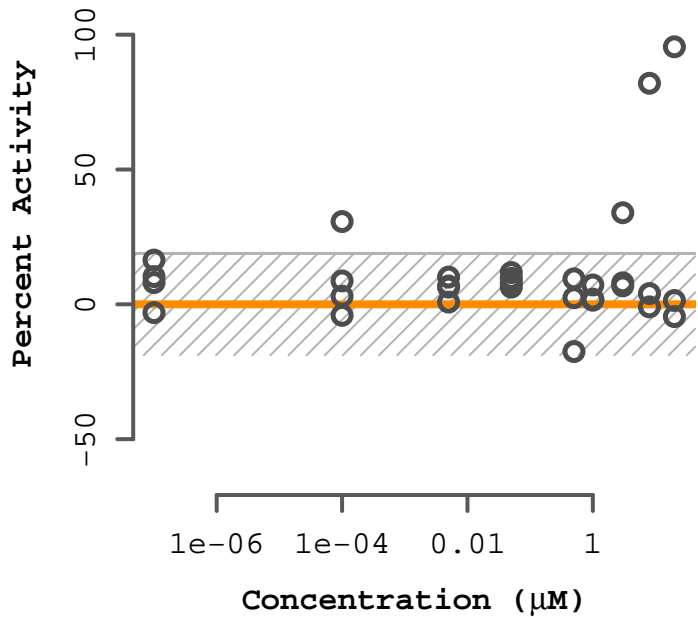

ASSAY: AEID3098 (CCTE\_Deisenroth\_DEVTOX\_RUES2-GLR\_Cel.

NAME: Cyclopamine

CHID: 43709 CASRN: 4449-51-8

SPID(S): ES211\_23\_23

M4ID: 42676177

HILL MODEL: Not applicable.

GAIN-LOSS MODEL: Not applicable.

|       |        |      |      |
|-------|--------|------|------|
|       | CNST   | HILL | GNLS |
| AIC:  | 266.73 | NA   | NA   |
| PROB: | 1      | NA   | NA   |
| RMSE: | 25.17  | NA   | NA   |

MAX\_MEAN: 30.8 MAX\_MED: 9.2 BMAD: 6.29

COFF: 18.9 HIT-CALL: 0 FITC: 4 ACTP: 0

FLAGS: 10

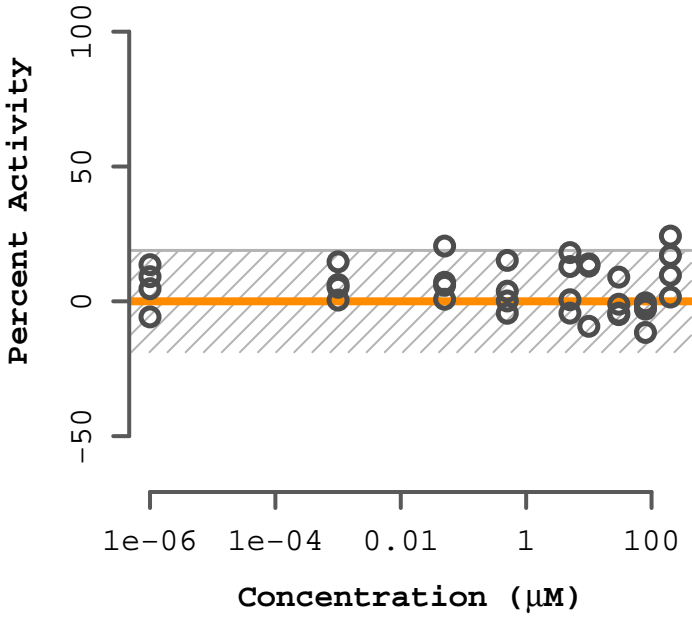

ASSAY: AEID3098 (CCTE\_Deisenroth\_DEVTOX\_RUES2-GLR\_Cel.

NAME: Penicillin G potassium  
CHID: 45106 CASRN: 113-98-4  
SPID(S): ES211\_49\_49  
M4ID: 42676180

HILL MODEL: Not applicable.

GAIN-LOSS MODEL: Not applicable.

|       |        |      |      |
|-------|--------|------|------|
|       | CNST   | HILL | GNLS |
| AIC:  | 274.19 | NA   | NA   |
| PROB: | 1      | NA   | NA   |
| RMSE: | 10.23  | NA   | NA   |

MAX\_MEAN: 13.1      MAX\_MED: 13.3      BMAD: 6.29

COFF: 18.9      HIT-CALL: 0      FITC: 4      ACTP: 0

FLAGS:

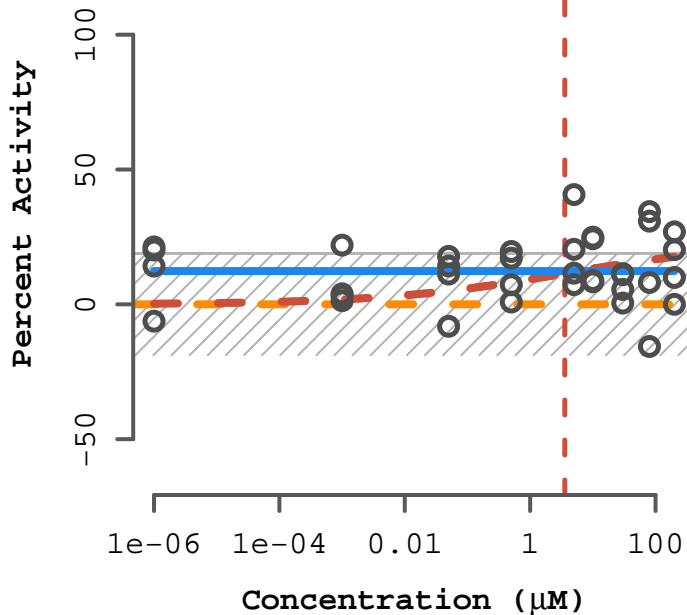

ASSAY: AEID3098 (CCTE\_Deisenroth\_DEVTOX\_RUES2-GLR\_Cel.

NAME: Thalidomide

CHID: 22524 CASRN: 50-35-1

SPID(S): ES211\_62\_62

M4ID: 42676213

HILL MODEL (in red):

|      | tp   | ga    | gw  |
|------|------|-------|-----|
| val: | 22.9 | 0.553 | 0.3 |
| sd:  | NaN  | NaN   | NaN |

GAIN-LOSS MODEL (in blue):

|      | tp   | ga | gw   | la   | lw   |
|------|------|----|------|------|------|
| val: | 12.3 | -7 | 6.53 | 4.06 | 10.3 |
| sd:  | NA   | NA | NA   | NA   | NA   |

|       | CNST   | HILL   | GNLS   |
|-------|--------|--------|--------|
| AIC:  | 312.26 | 295.66 | 293.36 |
| PROB: | 0      | 0.24   | 0.76   |
| RMSE: | 17.19  | 12.75  | 11.81  |

MAX\_MEAN: 20 MAX\_MED: 19.5 BMAD: 6.29

COFF: 18.9 HIT-CALL: 0 FITC: 27 ACTP: 1

FLAGS: 12



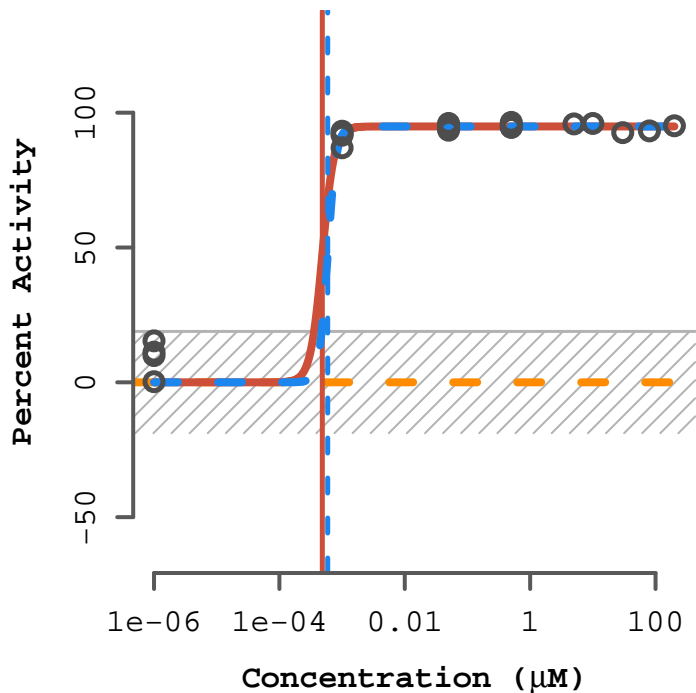

ASSAY: AEID3098 (CCTE\_Deisenroth\_DEVTOX\_RUES2-GLR\_Cel.

NAME: Actinomycin D

CHID: 20031 CASRN: 50-76-0

SPID(S): ES211\_11\_11

M4ID: 42676222

HILL MODEL (in red):

|      |      |       |      |
|------|------|-------|------|
|      | tp   | ga    | gw   |
| val: | 94.9 | -3.32 | 4.59 |
| sd:  | 0.57 | 0.176 | 2.54 |

GAIN-LOSS MODEL (in blue):

|      |      |       |      |       |         |
|------|------|-------|------|-------|---------|
|      | tp   | ga    | gw   | la    | lw      |
| val: | 94.9 | -3.23 | 6.31 | 3.39  | 12.2    |
| sd:  | 0.57 | 0.08  | 2.17 | 93900 | 1210000 |

|       |        |        |        |
|-------|--------|--------|--------|
|       | CNST   | HILL   | GNLS   |
| AIC:  | 327.56 | 122.79 | 126.79 |
| PROB: | 0      | 0.88   | 0.12   |
| RMSE: | 84.69  | 4.89   | 4.89   |

MAX\_MEAN: 96 MAX\_MED: 96 BMAD: 6.29

COFF: 18.9 HIT-CALL: 1 FITC: 41 ACTP: 1

FLAGS:

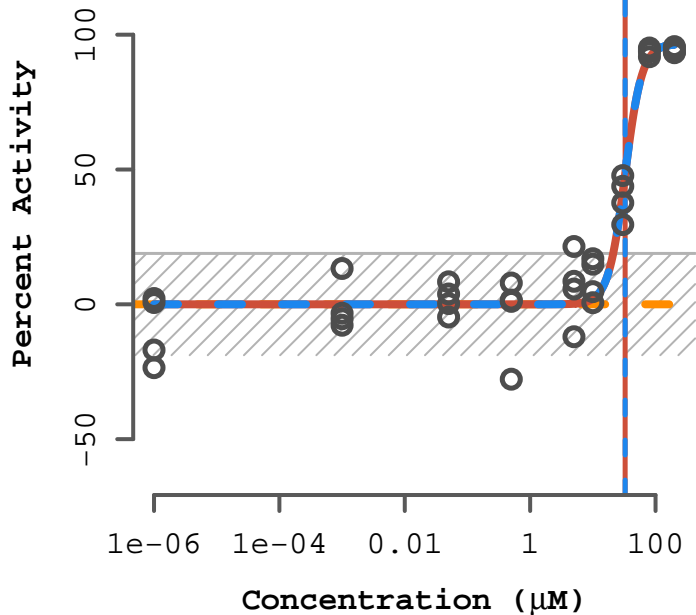

ASSAY: AEID3098 (CCTE\_Deisenroth\_DEVTOX\_RUES2-GLR\_Cel.

NAME: Bisphenol A

CHID: 20182 CASRN: 80-05-7

SPID(S): ES211\_16\_16

M4ID: 42676195

HILL MODEL (in red):

|      | tp   | ga     | gw   |
|------|------|--------|------|
| val: | 96.6 | 1.52   | 3.22 |
| sd:  | 3.54 | 0.0256 | 1.1  |

GAIN-LOSS MODEL (in blue):

|      | tp   | ga   | gw   | la   | lw   |
|------|------|------|------|------|------|
| val: | 96.6 | 1.52 | 3.22 | 4.26 | 11.9 |
| sd:  | NA   | NA   | NA   | NA   | NA   |

|       | CNST   | HILL   | GNLS   |
|-------|--------|--------|--------|
| AIC:  | 378.61 | 270.76 | 274.76 |
| PROB: | 0      | 0.88   | 0.12   |
| RMSE: | 47.32  | 9.72   | 9.72   |

MAX\_MEAN: 94.4      MAX\_MED: 94.4      BMAD: 6.29

COFF: 18.9      HIT-CALL: 1      FITC: 41      ACTP: 1

FLAGS:

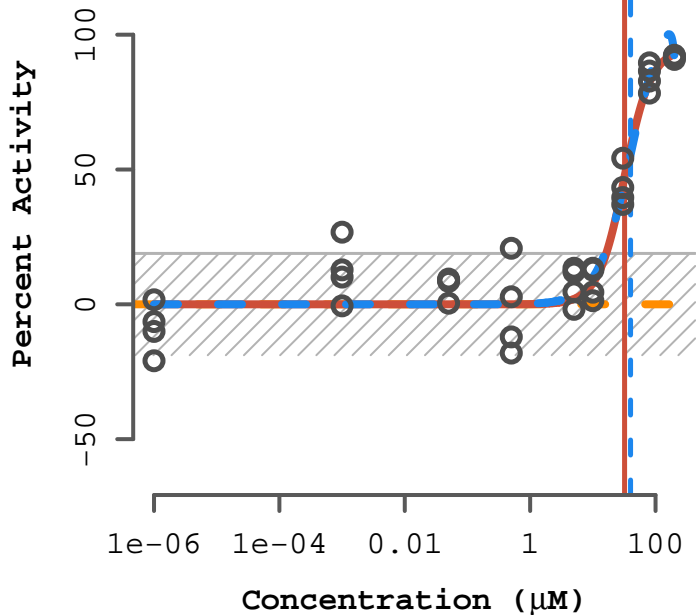

ASSAY: AEID3098 (CCTE\_Deisenroth\_DEVTOX\_RUES2-GLR\_Cel.

NAME: 4-Hydroxybenzoic acid butyl ester

CHID: 20209 CASRN: 94-26-8

SPID(S): ES211\_19\_19

M4ID: 42676192

HILL MODEL (in red):

|      | tp   | ga     | gw    |
|------|------|--------|-------|
| val: | 94.9 | 1.51   | 2.07  |
| sd:  | 4.32 | 0.0415 | 0.403 |

GAIN-LOSS MODEL (in blue):

|      | tp  | ga    | gw    | la     | lw   |
|------|-----|-------|-------|--------|------|
| val: | 111 | 1.6   | 1.67  | 2.37   | 12.6 |
| sd:  | 27  | 0.164 | 0.508 | 0.0184 | 9.71 |

|       | CNST   | HILL   | GNLS   |
|-------|--------|--------|--------|
| AIC:  | 376.27 | 272.74 | 275.77 |
| PROB: | 0      | 0.82   | 0.18   |
| RMSE: | 45.14  | 9.64   | 9.57   |

MAX\_MEAN: 91.7 MAX\_MED: 91.8 BMAD: 6.29

COFF: 18.9 HIT-CALL: 1 FITC: 41 ACTP: 1

FLAGS:

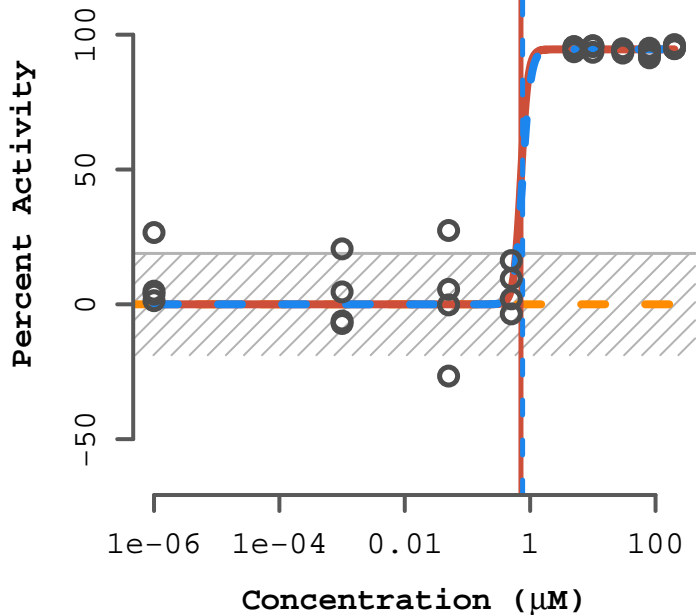

ASSAY: AEID3098 (CCTE\_Deisenroth\_DEVTOX\_RUES2-GLR\_Cel.

NAME: Diethylstilbestrol

CHID: 20465 CASRN: 56-53-1

SPID(S): ES211\_29\_29

M4ID: 42676242

HILL MODEL (in red):

|      | tp    | ga     | gw  |
|------|-------|--------|-----|
| val: | 94.6  | -0.147 | 7.7 |
| sd:  | 0.876 | 5.26   | 262 |

GAIN-LOSS MODEL (in blue):

|      | tp    | ga    | gw   | la   | lw   |
|------|-------|-------|------|------|------|
| val: | 94.6  | -0.12 | 6.59 | 3.26 | 8.39 |
| sd:  | 0.876 | 2.37  | 86.4 | 337  | 2950 |

|       | CNST   | HILL   | GNLS   |
|-------|--------|--------|--------|
| AIC:  | 436.24 | 251.18 | 255.18 |
| PROB: | 0      | 0.88   | 0.12   |
| RMSE: | 71.09  | 9.17   | 9.17   |

MAX\_MEAN: 95.5 MAX\_MED: 95.7 BMAD: 6.29

COFF: 18.9 HIT-CALL: 1 FITC: 41 ACTP: 1

FLAGS:

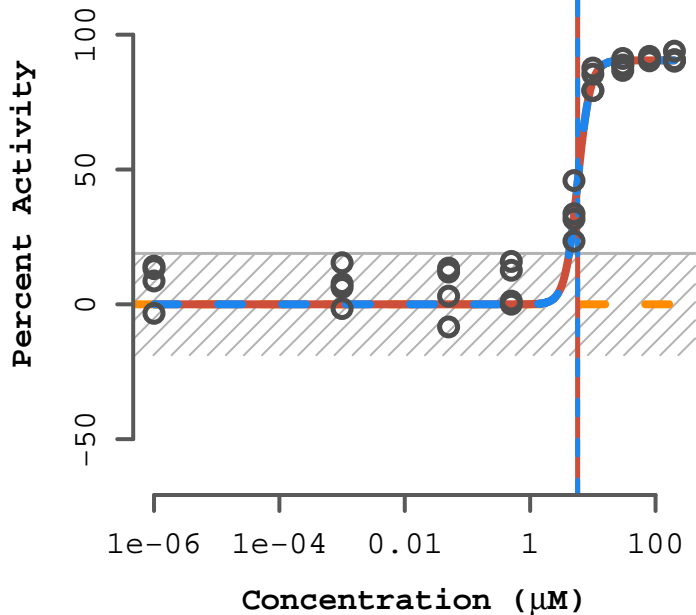

ASSAY: AEID3098 (CCTE\_Deisenroth\_DEVTOX\_RUES2-GLR\_Cel.

NAME: 5-Fluorouracil

CHID: 20634 CASRN: 51-21-8

SPID(S): ES211\_5\_5

M4ID: 42676205

HILL MODEL (in red):

|      | tp   | ga     | gw    |
|------|------|--------|-------|
| val: | 90.5 | 0.757  | 4.26  |
| sd:  | 1.53 | 0.0176 | 0.714 |

GAIN-LOSS MODEL (in blue):

|      | tp   | ga    | gw   | la   | lw   |
|------|------|-------|------|------|------|
| val: | 90.5 | 0.757 | 4.26 | 3.81 | 17.8 |
| sd:  | NA   | NA    | NA   | NA   | NA   |

|       | CNST   | HILL   | GNLS   |
|-------|--------|--------|--------|
| AIC:  | 403.55 | 254.25 | 258.25 |
| PROB: | 0      | 0.88   | 0.12   |
| RMSE: | 60.58  | 7.4    | 7.4    |

MAX\_MEAN: 91.4      MAX\_MED: 91      BMAD: 6.29

COFF: 18.9      HIT-CALL: 1      FITC: 41      ACTP: 1

FLAGS:

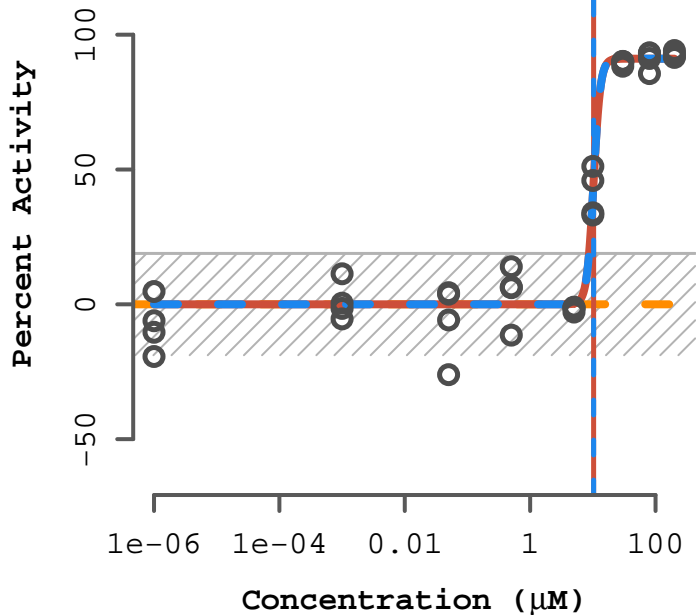

ASSAY: AEID3098 (CCTE\_Deisenroth\_DEVTOX\_RUES2-GLR\_Cel.

NAME: 1-(p-Chlorobenzoyl)-5-methoxy-2-methyl-Indole-

CHID: 20740 CASRN: 53-86-1

SPID(S): ES211\_38\_38

M4ID: 42676225

HILL MODEL (in red):

|      | tp   | ga     | gw   |
|------|------|--------|------|
| val: | 91.1 | 1.01   | 8    |
| sd:  | 1.5  | 0.0153 | 5.39 |

GAIN-LOSS MODEL (in blue):

|      | tp   | ga   | gw | la   | lw |
|------|------|------|----|------|----|
| val: | 91.1 | 1.01 | 8  | 4.25 | 12 |
| sd:  | NA   | NA   | NA | NA   | NA |

|       | CNST   | HILL   | GNLS   |
|-------|--------|--------|--------|
| AIC:  | 393.92 | 252.82 | 256.82 |
| PROB: | 0      | 0.88   | 0.12   |
| RMSE: | 54.85  | 7.78   | 7.78   |

MAX\_MEAN: 92.7 MAX\_MED: 92.5 BMAD: 6.29

COFF: 18.9 HIT-CALL: 1 FITC: 41 ACTP: 1

FLAGS:

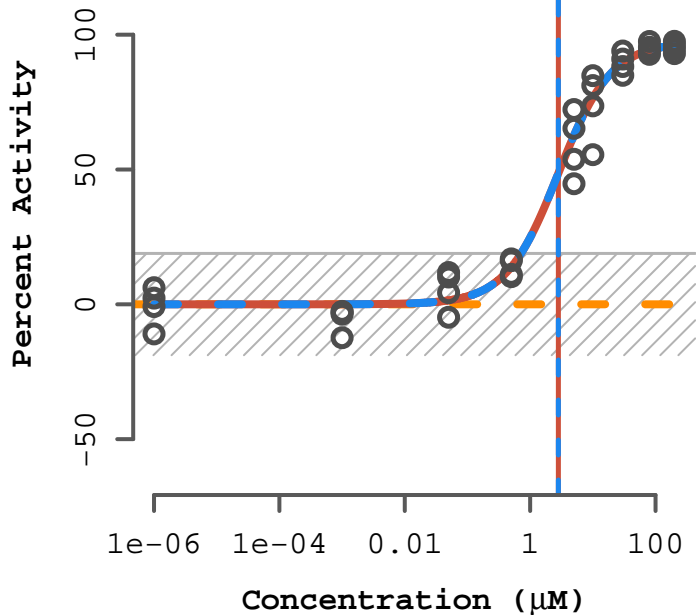

ASSAY: AEID3098 (CCTE\_Deisenroth\_DEVTOX\_RUES2-GLR\_Cel.

NAME: Lovastatin

CHID: 20784 CASRN: 75330-75-5

SPID(S): ES211\_42\_42

M4ID: 42676194

HILL MODEL (in red):

|      | tp   | ga     | gw    |
|------|------|--------|-------|
| val: | 97.2 | 0.45   | 1.04  |
| sd:  | 2.13 | 0.0633 | 0.105 |

GAIN-LOSS MODEL (in blue):

|      | tp   | ga   | gw   | la  | lw   |
|------|------|------|------|-----|------|
| val: | 97.2 | 0.45 | 1.04 | 4.3 | 8.99 |
| sd:  | NA   | NA   | NA   | NA  | NA   |

|       | CNST   | HILL   | GNLS   |
|-------|--------|--------|--------|
| AIC:  | 406.85 | 246.02 | 250.02 |
| PROB: | 0      | 0.88   | 0.12   |
| RMSE: | 62.93  | 6.92   | 6.92   |

MAX\_MEAN: 95.3 MAX\_MED: 95.4 BMAD: 6.29

COFF: 18.9 HIT-CALL: 1 FITC: 41 ACTP: 1

FLAGS:

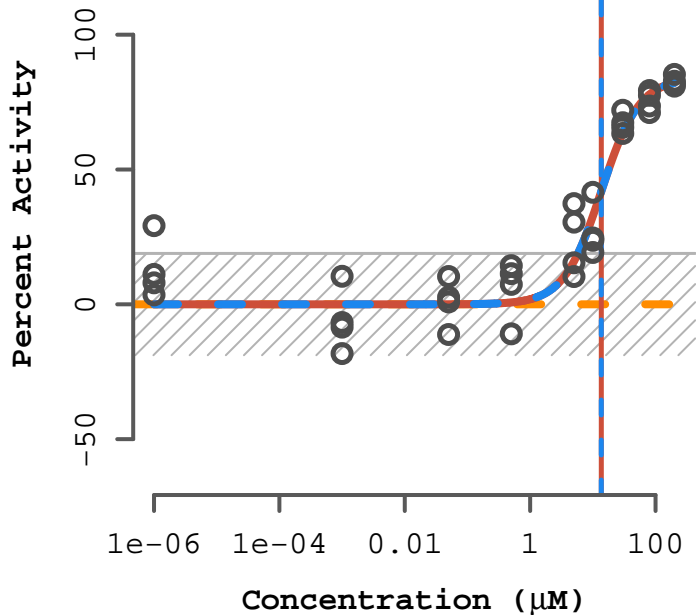

ASSAY: AEID3098 (CCTE\_Deisenroth\_DEVTOX\_RUES2-GLR\_Cel.

NAME: Busulfan

CHID: 20910 CASRN: 55-98-1

SPID(S): ES211\_18\_18

M4ID: 42676183

HILL MODEL (in red):

|      | tp   | ga     | gw    |
|------|------|--------|-------|
| val: | 83.8 | 1.13   | 1.44  |
| sd:  | 4.5  | 0.0675 | 0.356 |

GAIN-LOSS MODEL (in blue):

|      | tp   | ga   | gw   | la   | lw   |
|------|------|------|------|------|------|
| val: | 83.8 | 1.13 | 1.44 | 3.99 | 15.9 |
| sd:  | NA   | NA   | NA   | NA   | NA   |

|       | CNST   | HILL   | GNLS   |
|-------|--------|--------|--------|
| AIC:  | 382.06 | 276.61 | 280.61 |
| PROB: | 0      | 0.88   | 0.12   |
| RMSE: | 46.1   | 10.01  | 10.01  |

MAX\_MEAN: 82.7 MAX\_MED: 82.3 BMAD: 6.29

COFF: 18.9 HIT-CALL: 1 FITC: 41 ACTP: 1

FLAGS:



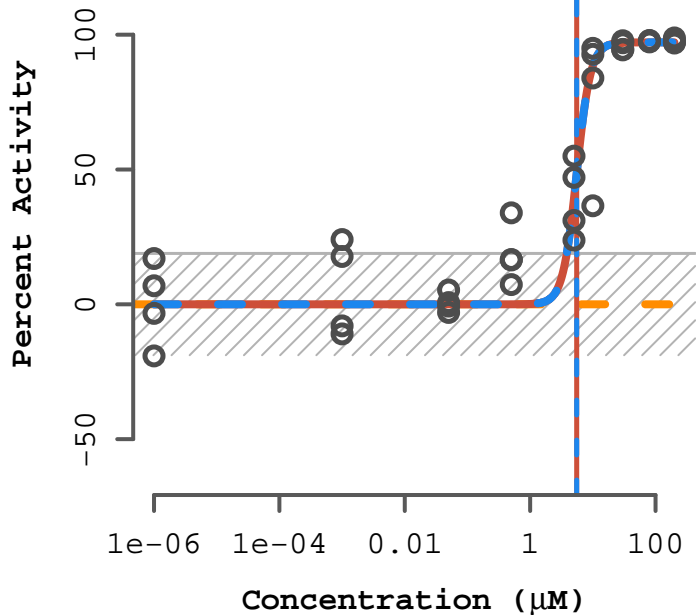

ASSAY: AEID3098 (CCTE\_Deisenroth\_DEVTOX\_RUES2-GLR\_Cel.

NAME: all-trans-Retinoic acid

CHID: 21239 CASRN: 302-79-4

SPID(S): ES211\_13\_13

M4ID: 42676210

HILL MODEL (in red):

|      | tp   | ga     | gw   |
|------|------|--------|------|
| val: | 97.2 | 0.742  | 3.9  |
| sd:  | 2.32 | 0.0319 | 1.14 |

GAIN-LOSS MODEL (in blue):

|      | tp   | ga     | gw   | la   | lw   |
|------|------|--------|------|------|------|
| val: | 97.2 | 0.742  | 3.9  | 3.11 | 8.97 |
| sd:  | 2.32 | 0.0319 | 1.14 | 338  | 3720 |

|       | CNST  | HILL   | GNLS   |
|-------|-------|--------|--------|
| AIC:  | 408   | 290.67 | 294.67 |
| PROB: | 0     | 0.88   | 0.12   |
| RMSE: | 64.44 | 13.93  | 13.93  |

MAX\_MEAN: 97.7 MAX\_MED: 97.6 BMAD: 6.29

COFF: 18.9 HIT-CALL: 1 FITC: 41 ACTP: 1

FLAGS:

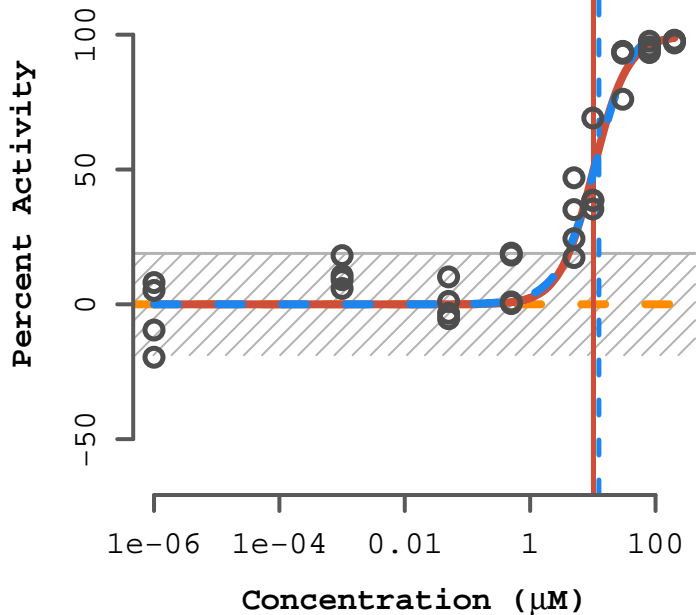

ASSAY: AEID3098 (CCTE\_Deisenroth\_DEVTOX\_RUES2-GLR\_Cel.

NAME: 13-cis Retinoic acid

CHID: 23177 CASRN: 4759-48-2

SPID(S): ES211\_2\_2

M4ID: 42676208

HILL MODEL (in red):

|      |      |        |       |
|------|------|--------|-------|
|      | tp   | ga     | gw    |
| val: | 99.7 | 1.01   | 1.6   |
| sd:  | 3.57 | 0.0628 | 0.346 |

GAIN-LOSS MODEL (in blue):

|      |      |       |       |      |       |
|------|------|-------|-------|------|-------|
|      | tp   | ga    | gw    | la   | lw    |
| val: | 118  | 1.1   | 1.38  | 3.68 | 0.529 |
| sd:  | 45.7 | 0.161 | 0.416 | 1.85 | 1.1   |

|       |        |               |        |
|-------|--------|---------------|--------|
|       | CNST   | <b>HILL</b>   | GNLS   |
| AIC:  | 399.18 | <b>279.48</b> | 282.51 |
| PROB: | 0      | <b>0.82</b>   | 0.18   |
| RMSE: | 58.18  | <b>10.19</b>  | 10.04  |

MAX\_MEAN: 97.6 MAX\_MED: 97.7 BMAD: 6.29

COFF: 18.9 HIT-CALL: 1 FITC: 41 ACTP: 1

FLAGS:

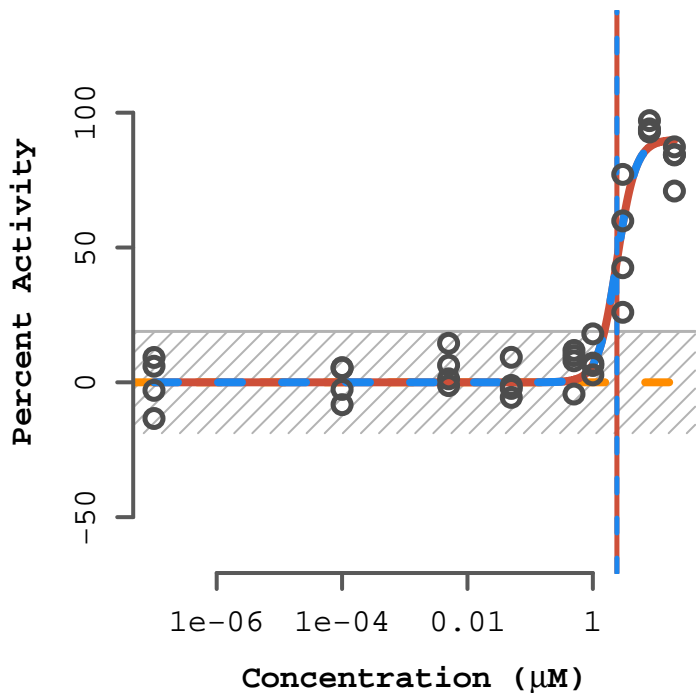

ASSAY: AEID3098 (CCTE\_Deisenroth\_DEVTOX\_RUES2-GLR\_Cel.

NAME: Ziprasidone

CHID: 23753 CASRN: 146939-27-7

SPID(S): ES211\_66\_66

M4ID: 42676186

HILL MODEL (in red):

|      | tp   | ga     | gw    |
|------|------|--------|-------|
| val: | 90   | 0.384  | 2.88  |
| sd:  | 3.59 | 0.0552 | 0.632 |

GAIN-LOSS MODEL (in blue):

|      | tp   | ga     | gw    | la    | lw     |
|------|------|--------|-------|-------|--------|
| val: | 90   | 0.384  | 2.88  | 2.41  | 12.5   |
| sd:  | 3.59 | 0.0552 | 0.632 | 59300 | 811000 |

|       | CNST   | HILL   | GNLS   |
|-------|--------|--------|--------|
| AIC:  | 376.67 | 273.73 | 277.73 |
| PROB: | 0      | 0.88   | 0.12   |
| RMSE: | 45.98  | 9.92   | 9.92   |

MAX\_MEAN: 94.3 MAX\_MED: 93.7 BMAD: 6.29

COFF: 18.9 HIT-CALL: 1 FITC: 41 ACTP: 1

FLAGS:

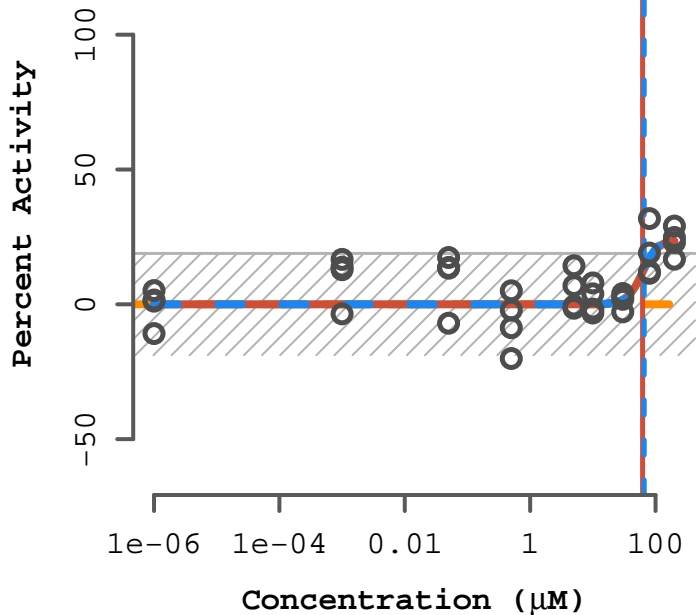

ASSAY: AEID3098 (CCTE\_Deisenroth\_DEVTOX\_RUES2-GLR\_Cel.

NAME: Stavudine

CHID: 23819 CASRN: 3056-17-5

SPID(S): ES211\_58\_58

M4ID: 42676207

HILL MODEL (in red):

|      | tp   | ga    | gw   |
|------|------|-------|------|
| val: | 23.9 | 1.79  | 3.56 |
| sd:  | 4.16 | 0.119 | 2.62 |

GAIN-LOSS MODEL (in blue):

|      | tp   | ga   | gw   | la   | lw    |
|------|------|------|------|------|-------|
| val: | 29.6 | 1.82 | 3.45 | 3.69 | 0.456 |
| sd:  | NaN  | NaN  | NaN  | NaN  | NaN   |

|       | CNST   | HILL   | GNLS   |
|-------|--------|--------|--------|
| AIC:  | 291.98 | 267.74 | 271.74 |
| PROB: | 0      | 0.88   | 0.12   |
| RMSE: | 13.25  | 8.74   | 8.74   |

MAX\_MEAN: 23.4 MAX\_MED: 23.9 BMAD: 6.29

COFF: 18.9 HIT-CALL: 1 FITC: 41 ACTP: 1

FLAGS: 7; 17

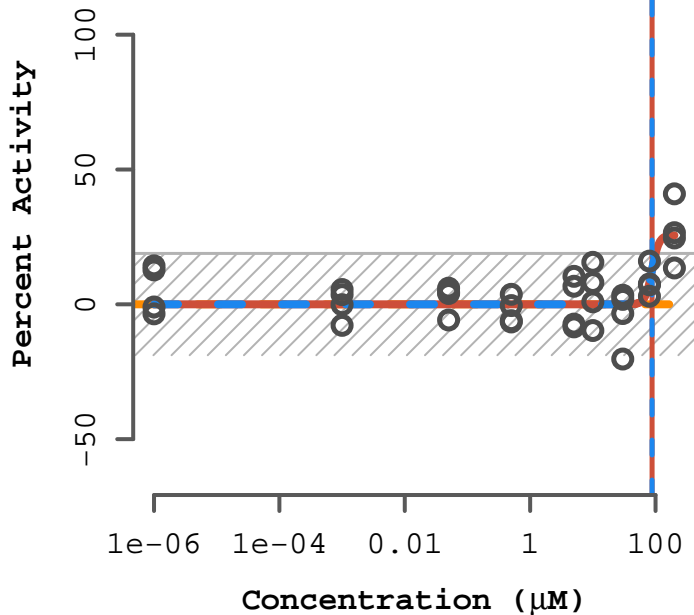

ASSAY: AEID3098 (CCTE\_Deisenroth\_DEVTOX\_RUES2-GLR\_Cel.

NAME: Cyclophosphamide monohydrate

CHID: 24888 CASRN: 6055-19-2

SPID(S): ES211\_24\_24

M4ID: 42676224

HILL MODEL (in red):

|      |      |       |      |
|------|------|-------|------|
|      | tp   | ga    | gw   |
| val: | 25.6 | 1.94  | 8    |
| sd:  | 4.3  | 0.145 | 26.9 |

GAIN-LOSS MODEL (in blue):

|      |      |      |    |      |      |
|------|------|------|----|------|------|
|      | tp   | ga   | gw | la   | lw   |
| val: | 25.6 | 1.94 | 8  | 3.72 | 11.1 |
| sd:  | NA   | NA   | NA | NA   | NA   |

|       |        |        |        |
|-------|--------|--------|--------|
|       | CNST   | HILL   | GNLS   |
| AIC:  | 280.31 | 261.16 | 265.16 |
| PROB: | 0      | 0.88   | 0.12   |
| RMSE: | 12.2   | 7.95   | 7.95   |

MAX\_MEAN: 26.4 MAX\_MED: 25.6 BMAD: 6.29

COFF: 18.9 HIT-CALL: 1 FITC: 41 ACTP: 1

FLAGS: 7; 17

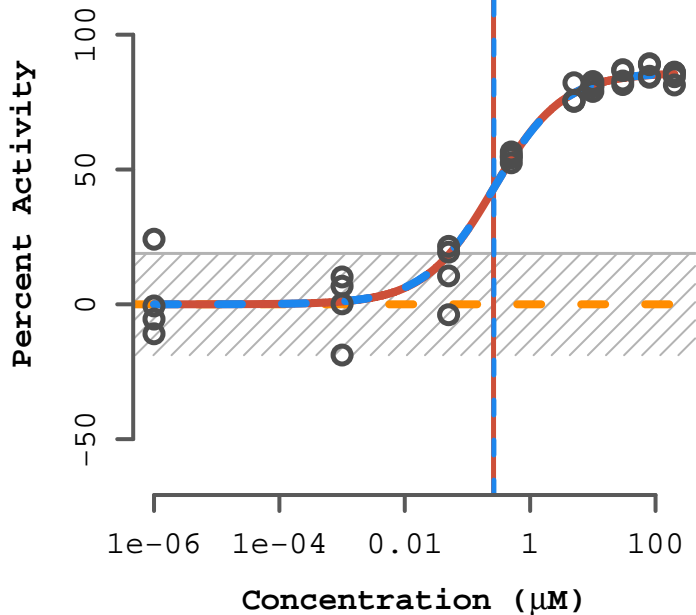

ASSAY: AEID3098 (CCTE\_Deisenroth\_DEVTOX\_RUES2-GLR\_Cel.

NAME: Cytarabine hydrochloride

CHID: 24891 CASRN: 69-74-9

SPID(S): ES211\_25\_25

M4ID: 42676179

HILL MODEL (in red):

|      |      |        |        |
|------|------|--------|--------|
|      | tp   | ga     | gw     |
| val: | 85.9 | -0.584 | 0.789  |
| sd:  | 1.37 | 0.0507 | 0.0862 |

GAIN-LOSS MODEL (in blue):

|      |      |        |       |     |      |
|------|------|--------|-------|-----|------|
|      | tp   | ga     | gw    | la  | lw   |
| val: | 86.2 | -0.579 | 0.779 | 4.3 | 1.11 |
| sd:  | NaN  | NaN    | NaN   | NaN | NaN  |

|       |        |        |       |
|-------|--------|--------|-------|
|       | CNST   | HILL   | GNLS  |
| AIC:  | 410.86 | 237.96 | 241.9 |
| PROB: | 0      | 0.88   | 0.12  |
| RMSE: | 64.86  | 7.35   | 7.36  |

MAX\_MEAN: 86.7 MAX\_MED: 86.7 BMAD: 6.29

COFF: 18.9 HIT-CALL: 1 FITC: 41 ACTP: 1

FLAGS:

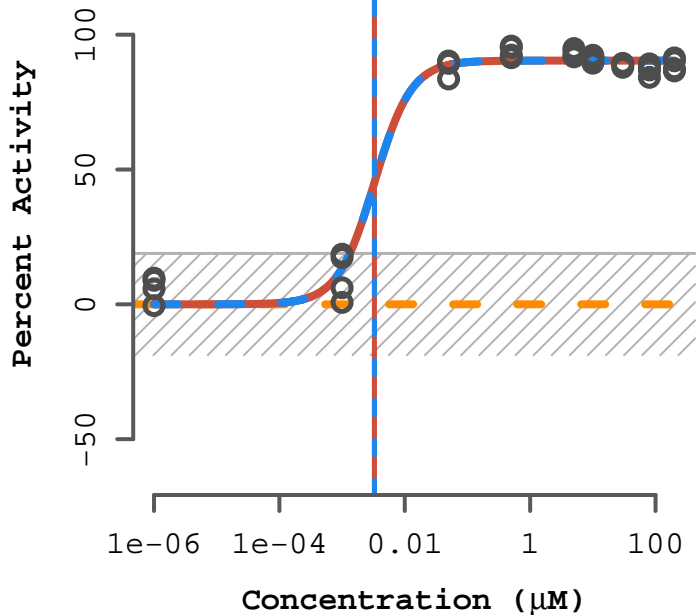

ASSAY: AEID3098 (CCTE\_Deisenroth\_DEVTOX\_RUES2-GLR\_Cel.

NAME: Adriamycin hydrochloride

CHID: 30636 CASRN: 25316-40-9

SPID(S): ES211\_67\_67

M4ID: 42676193

HILL MODEL (in red):

|      | tp    | ga    | gw    |
|------|-------|-------|-------|
| val: | 90.4  | -2.48 | 1.47  |
| sd:  | 0.753 | 0.146 | 0.316 |

GAIN-LOSS MODEL (in blue):

|      | tp   | ga    | gw   | la   | lw   |
|------|------|-------|------|------|------|
| val: | 90.4 | -2.48 | 1.47 | 3.25 | 11.6 |
| sd:  | NaN  | NaN   | NaN  | NaN  | NaN  |

|       | CNST   | HILL   | GNLS   |
|-------|--------|--------|--------|
| AIC:  | 490.14 | 215.88 | 219.88 |
| PROB: | 0      | 0.88   | 0.12   |
| RMSE: | 79.67  | 4.39   | 4.39   |

MAX\_MEAN: 93.8      MAX\_MED: 93.9      BMAD: 6.29

COFF: 18.9      HIT-CALL: 1      FITC: 41      ACTP: 1

FLAGS:

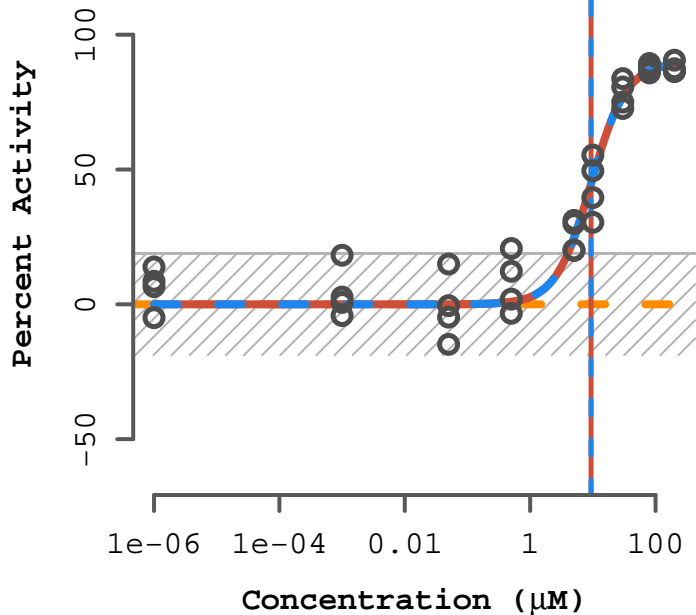

ASSAY: AEID3098 (CCTE\_Deisenroth\_DEVTOX\_RUES2-GLR\_Cel.

NAME: 5-Bromo-2'-deoxyuridine

CHID: 33105 CASRN: 59-14-3

SPID(S): ES211\_4\_4

M4ID: 42676176

HILL MODEL (in red):

|      | tp   | ga     | gw    |
|------|------|--------|-------|
| val: | 89.7 | 0.972  | 1.55  |
| sd:  | 2.7  | 0.0446 | 0.241 |

GAIN-LOSS MODEL (in blue):

|      | tp   | ga    | gw   | la   | lw   |
|------|------|-------|------|------|------|
| val: | 89.7 | 0.972 | 1.55 | 3.78 | 8.93 |
| sd:  | NaN  | NaN   | NaN  | NaN  | NaN  |

|       | CNST   | HILL   | GNLS   |
|-------|--------|--------|--------|
| AIC:  | 391.52 | 259.49 | 263.49 |
| PROB: | 0      | 0.88   | 0.12   |
| RMSE: | 52.26  | 8.04   | 8.04   |

MAX\_MEAN: 87.7 MAX\_MED: 87.6 BMAD: 6.29

COFF: 18.9 HIT-CALL: 1 FITC: 41 ACTP: 1

FLAGS:



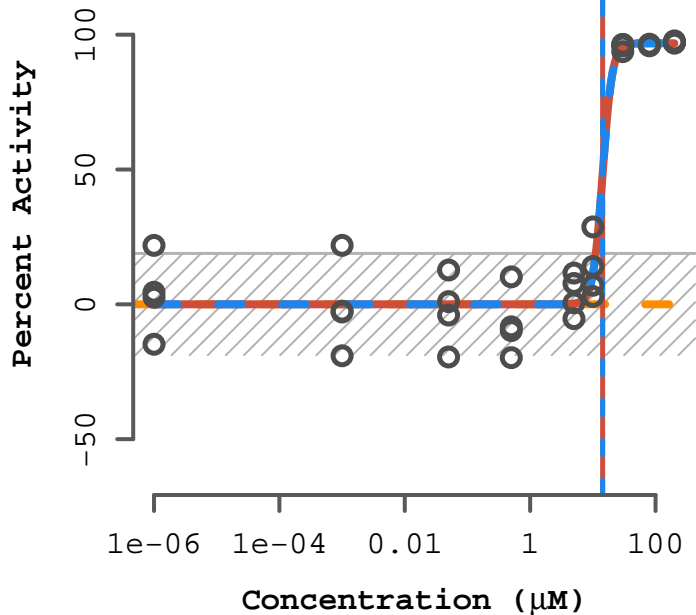

ASSAY: AEID3098 (CCTE\_Deisenroth\_DEVTOX\_RUES2-GLR\_Cel.

NAME: Amiodarone hydrochloride

CHID: 37185 CASRN: 19774-82-4

SPID(S): ES211\_14\_14

M4ID: 42676232

HILL MODEL (in red):

|      | tp   | ga     | gw   |
|------|------|--------|------|
| val: | 96.8 | 1.16   | 5.64 |
| sd:  | 2.25 | 0.0694 | 2.43 |

GAIN-LOSS MODEL (in blue):

|      | tp   | ga     | gw   | la   | lw   |
|------|------|--------|------|------|------|
| val: | 96.8 | 1.16   | 5.64 | 3.09 | 10   |
| sd:  | 2.25 | 0.0694 | 2.43 | 594  | 7520 |

|       | CNST  | HILL   | GNLS   |
|-------|-------|--------|--------|
| AIC:  | 394.9 | 272.56 | 276.56 |
| PROB: | 0     | 0.88   | 0.12   |
| RMSE: | 56.63 | 9.75   | 9.75   |

MAX\_MEAN: 97.2 MAX\_MED: 97.1 BMAD: 6.29

COFF: 18.9 HIT-CALL: 1 FITC: 41 ACTP: 1

FLAGS:

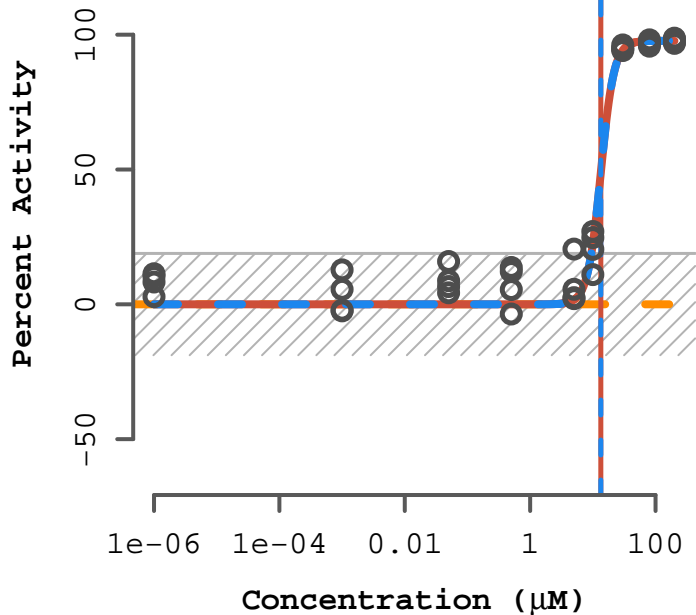

ASSAY: AEID3098 (CCTE\_Deisenroth\_DEVTOX\_RUES2-GLR\_Cel.

NAME: Imatinib mesylate

CHID: 40502 CASRN: 220127-57-1

SPID(S): ES211\_37\_37

M4ID: 42676220

HILL MODEL (in red):

|      | tp   | ga    | gw    |
|------|------|-------|-------|
| val: | 97.7 | 1.13  | 4.11  |
| sd:  | 1.67 | 0.027 | 0.753 |

GAIN-LOSS MODEL (in blue):

|      | tp   | ga    | gw    | la   | lw   |
|------|------|-------|-------|------|------|
| val: | 97.7 | 1.13  | 4.11  | 2.74 | 15.2 |
| sd:  | 1.67 | 0.027 | 0.754 | 62.6 | 2010 |

|       | CNST   | HILL   | GNLS   |
|-------|--------|--------|--------|
| AIC:  | 394.76 | 250.01 | 254.01 |
| PROB: | 0      | 0.88   | 0.12   |
| RMSE: | 56.66  | 7.14   | 7.14   |

MAX\_MEAN: 97.8 MAX\_MED: 97.8 BMAD: 6.29

COFF: 18.9 HIT-CALL: 1 FITC: 41 ACTP: 1

FLAGS:

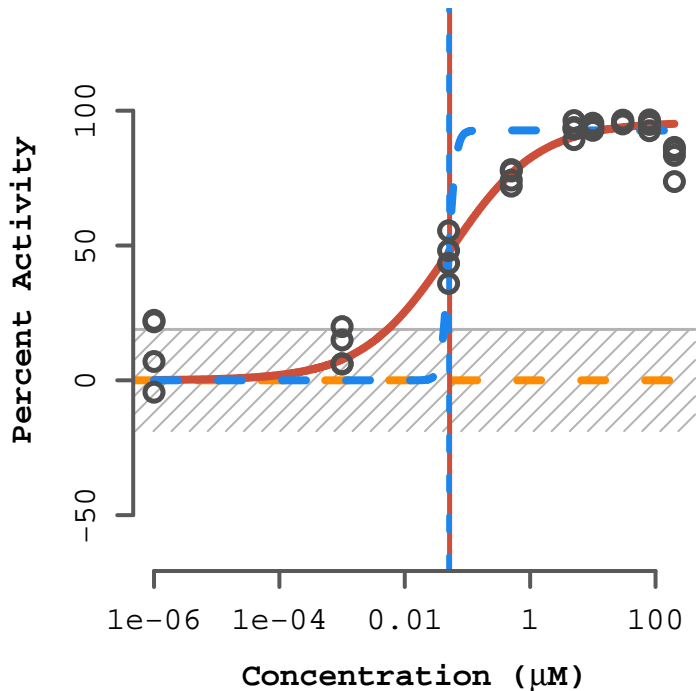

ASSAY: AEID3098 (CCTE\_Deisenroth\_DEVTOX\_RUES2-GLR\_Cel.

NAME: Dasatinib

CHID: 40979 CASRN: 302962-49-8

SPID(S): ES211\_26\_26

M4ID: 42676188

HILL MODEL (in red):

|      |      |        |        |
|------|------|--------|--------|
|      | tp   | ga     | gw     |
| val: | 95.7 | -1.28  | 0.617  |
| sd:  | 1.88 | 0.0937 | 0.0755 |

GAIN-LOSS MODEL (in blue):

|      |      |      |     |      |     |
|------|------|------|-----|------|-----|
|      | tp   | ga   | gw  | la   | lw  |
| val: | 92.7 | -1.3 | 7.5 | 2.36 | 15  |
| sd:  | NaN  | NaN  | NaN | NaN  | NaN |

|       |        |       |        |
|-------|--------|-------|--------|
|       | CNST   | HILL  | GNLS   |
| AIC:  | 422.07 | 254.4 | 275.29 |
| PROB: | 0      | 1     | 0      |
| RMSE: | 75.12  | 8.07  | 9.64   |

MAX\_MEAN: 95.9 MAX\_MED: 96 BMAD: 6.29

COFF: 18.9 HIT-CALL: 1 FITC: 41 ACTP: 1

FLAGS:

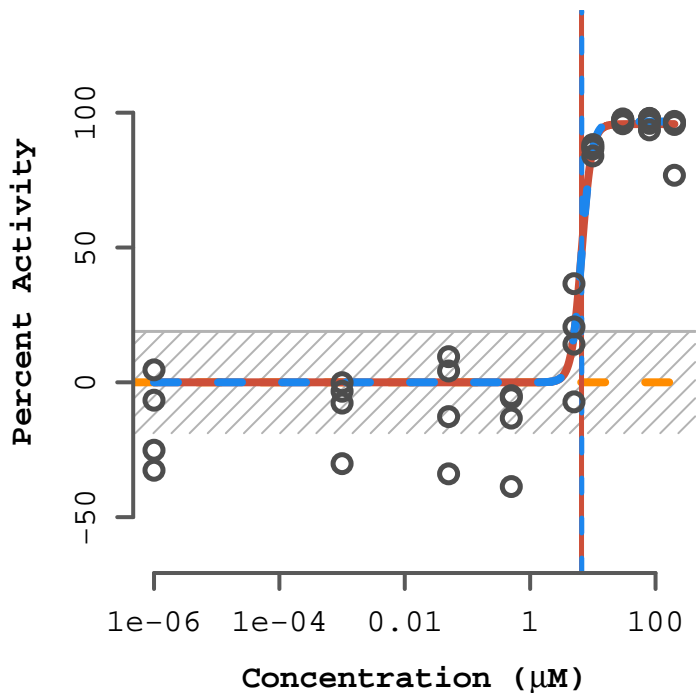

ASSAY: AEID3098 (CCTE\_Deisenroth\_DEVTOX\_RUES2-GLR\_Cel.

NAME: Gefitinib

CHID: 41034 CASRN: 184475-35-2

SPID(S): ES211\_34\_34

M4ID: 42676241

HILL MODEL (in red):

|      | tp   | ga     | gw    |
|------|------|--------|-------|
| val: | 95.8 | 0.819  | 5.38  |
| sd:  | 2.43 | 0.0278 | 0.988 |

GAIN-LOSS MODEL (in blue):

|      | tp   | ga    | gw   | la   | lw   |
|------|------|-------|------|------|------|
| val: | 96.7 | 0.823 | 5.25 | 2.38 | 17.8 |
| sd:  | NaN  | NaN   | NaN  | NaN  | NaN  |

|       | CNST   | HILL   | GNLS   |
|-------|--------|--------|--------|
| AIC:  | 407.33 | 294.51 | 298.09 |
| PROB: | 0      | 0.86   | 0.14   |
| RMSE: | 63.76  | 14.22  | 14.15  |

MAX\_MEAN: 97.1 MAX\_MED: 97.3 BMAD: 6.29

COFF: 18.9 HIT-CALL: 1 FITC: 41 ACTP: 1

FLAGS:

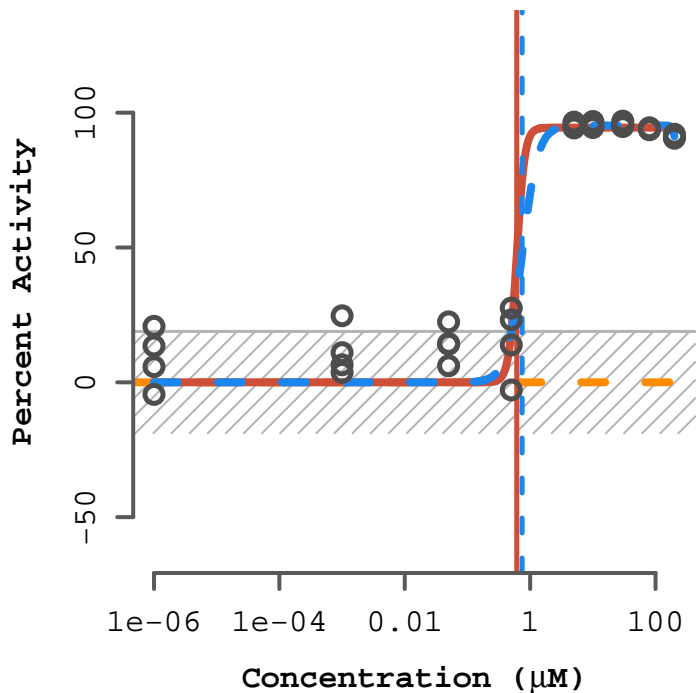

ASSAY: AEID3098 (CCTE\_Deisenroth\_DEVTOX\_RUES2-GLR\_Cel.

NAME: Sorafenib

CHID: 41128 CASRN: 284461-73-0

SPID(S): ES211\_57\_57

M4ID: 42676233

HILL MODEL (in red):

|      | tp   | ga     | gw   |
|------|------|--------|------|
| val: | 94.5 | -0.214 | 6.86 |
| sd:  | 1.23 | 1.97   | 155  |

GAIN-LOSS MODEL (in blue):

|      | tp   | ga     | gw   | la   | lw  |
|------|------|--------|------|------|-----|
| val: | 95.3 | -0.128 | 3.45 | 2.39 | 16  |
| sd:  | NaN  | NaN    | NaN  | NaN  | NaN |

|       | CNST   | HILL   | GNLS   |
|-------|--------|--------|--------|
| AIC:  | 416.98 | 263.99 | 266.17 |
| PROB: | 0      | 0.75   | 0.25   |
| RMSE: | 71.16  | 9.23   | 9.16   |

MAX\_MEAN: 95.7 MAX\_MED: 95.8 BMAD: 6.29

COFF: 18.9 HIT-CALL: 1 FITC: 41 ACTP: 1

FLAGS:

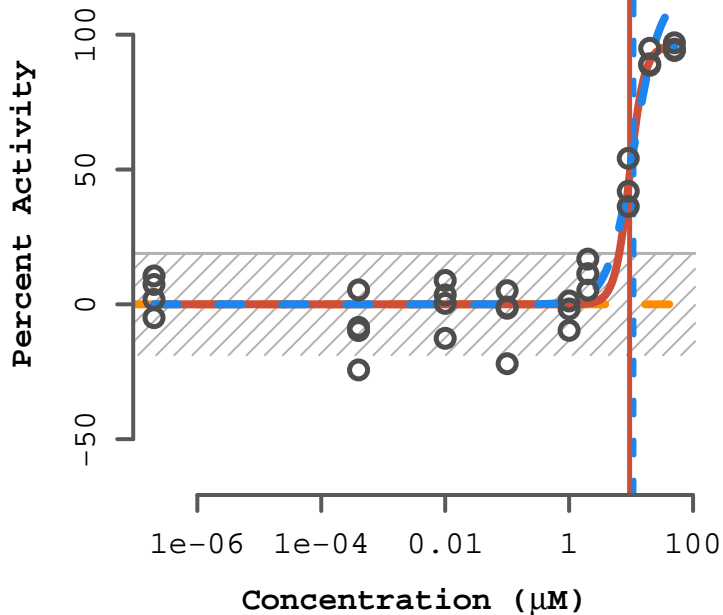

ASSAY: AEID3098 (CCTE\_Deisenroth\_DEVTOX\_RUES2-GLR\_Cel.

NAME: Ritanserin

CHID: 42594 CASRN: 87051-43-2

SPID(S): ES211\_53\_53

M4ID: 42676237

HILL MODEL (in red):

|      | tp   | ga     | gw   |
|------|------|--------|------|
| val: | 96.1 | 0.976  | 3.63 |
| sd:  | 4.09 | 0.0265 | 1.39 |

GAIN-LOSS MODEL (in blue):

|      | tp   | ga    | gw    | la      | lw   |
|------|------|-------|-------|---------|------|
| val: | 116  | 1.05  | 2.05  | 1.74    | 18   |
| sd:  | 25.1 | 0.108 | 0.807 | 0.00788 | 10.7 |

|       | CNST  | HILL   | GNLS   |
|-------|-------|--------|--------|
| AIC:  | 319.9 | 230.34 | 232.31 |
| PROB: | 0     | 0.73   | 0.27   |
| RMSE: | 44.13 | 8.9    | 8.65   |

MAX\_MEAN: 95.3 MAX\_MED: 94.7 BMAD: 6.29

COFF: 18.9 HIT-CALL: 1 FITC: 41 ACTP: 1

FLAGS:

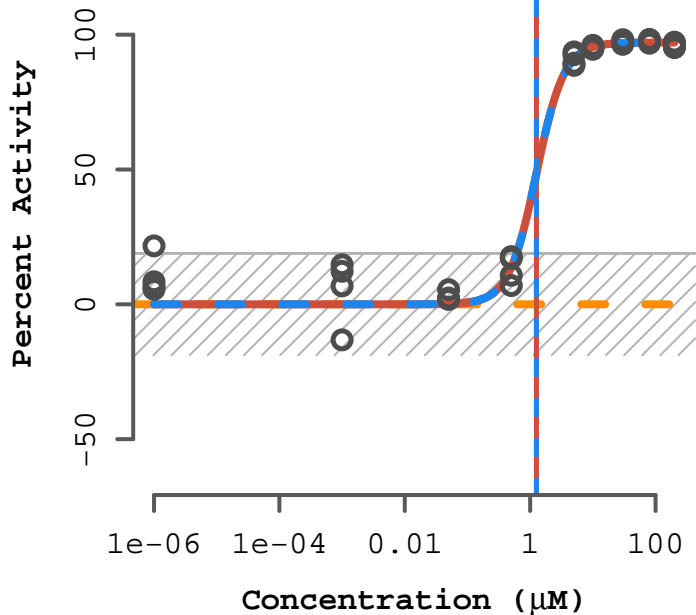

ASSAY: AEID3098 (CCTE\_Deisenroth\_DEVTOX\_RUES2-GLR\_Cel.

NAME: Sunitinib malate

CHID: 46492 CASRN: 341031-54-7

SPID(S): ES211\_60\_60

M4ID: 42676215

HILL MODEL (in red):

|      | tp    | ga     | gw   |
|------|-------|--------|------|
| val: | 97.1  | 0.1    | 1.96 |
| sd:  | 0.924 | 0.0433 | 0.18 |

GAIN-LOSS MODEL (in blue):

|      | tp   | ga  | gw   | la   | lw   |
|------|------|-----|------|------|------|
| val: | 97.1 | 0.1 | 1.96 | 4.17 | 11.1 |
| sd:  | NA   | NA  | NA   | NA   | NA   |

|       | CNST   | HILL   | GNLS   |
|-------|--------|--------|--------|
| AIC:  | 416.93 | 229.81 | 233.81 |
| PROB: | 0      | 0.88   | 0.12   |
| RMSE: | 71.6   | 6.13   | 6.13   |

MAX\_MEAN: 97.6 MAX\_MED: 97.7 BMAD: 6.29

COFF: 18.9 HIT-CALL: 1 FITC: 41 ACTP: 1

FLAGS:

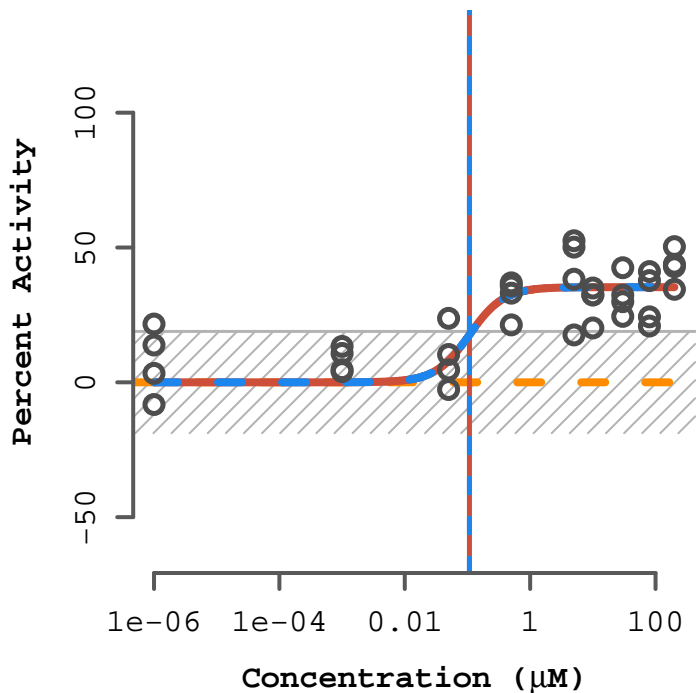

ASSAY: AEID3098 (CCTE\_Deisenroth\_DEVTOX\_RUES2-GLR\_Cel.

NAME: Lenalidomide

CHID: 46664 CASRN: 191732-72-6

SPID(S): ES211\_41\_41

M4ID: 42676202

HILL MODEL (in red):

|      | tp   | ga     | gw    |
|------|------|--------|-------|
| val: | 35.3 | -0.968 | 1.59  |
| sd:  | 2.4  | 0.236  | 0.929 |

GAIN-LOSS MODEL (in blue):

|      | tp   | ga     | gw    | la    | lw    |
|------|------|--------|-------|-------|-------|
| val: | 35.3 | -0.968 | 1.59  | 3.84  | 6.86  |
| sd:  | 2.4  | 0.236  | 0.929 | 11700 | 52100 |

|       | CNST   | HILL  | GNLS  |
|-------|--------|-------|-------|
| AIC:  | 355.18 | 279.9 | 283.9 |
| PROB: | 0      | 0.88  | 0.12  |
| RMSE: | 30.14  | 10.03 | 10.03 |

MAX\_MEAN: 42.9 MAX\_MED: 44.2 BMAD: 6.29

COFF: 18.9 HIT-CALL: 1 FITC: 41 ACTP: 1

FLAGS: 17



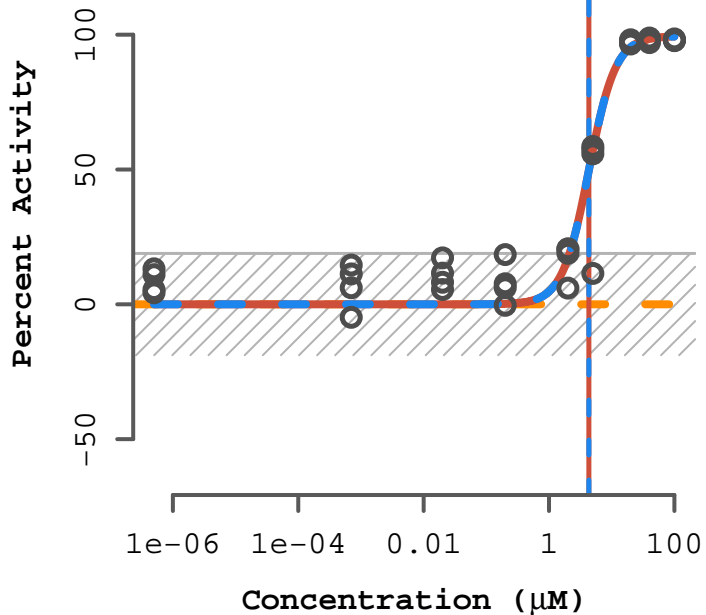

ASSAY: AEID3098 (CCTE\_Deisenroth\_DEVTOX\_RUES2-GLR\_Cel.

NAME: Vandetanib

CHID: 46681 CASRN: 443913-73-3

SPID(S): ES211\_64\_64

M4ID: 42676212

HILL MODEL (in red):

|      | tp   | ga     | gw    |
|------|------|--------|-------|
| val: | 99.5 | 0.636  | 2.04  |
| sd:  | 1.91 | 0.0271 | 0.271 |

GAIN-LOSS MODEL (in blue):

|      | tp   | ga    | gw   | la   | lw   |
|------|------|-------|------|------|------|
| val: | 99.5 | 0.636 | 2.04 | 3.76 | 12.9 |
| sd:  | NA   | NA    | NA   | NA   | NA   |

|       | CNST   | HILL   | GNLS   |
|-------|--------|--------|--------|
| AIC:  | 400.29 | 265.01 | 269.01 |
| PROB: | 0      | 0.88   | 0.12   |
| RMSE: | 59.58  | 10.49  | 10.49  |

MAX\_MEAN: 98.1 MAX\_MED: 98.3 BMAD: 6.29

COFF: 18.9 HIT-CALL: 1 FITC: 41 ACTP: 1

FLAGS:

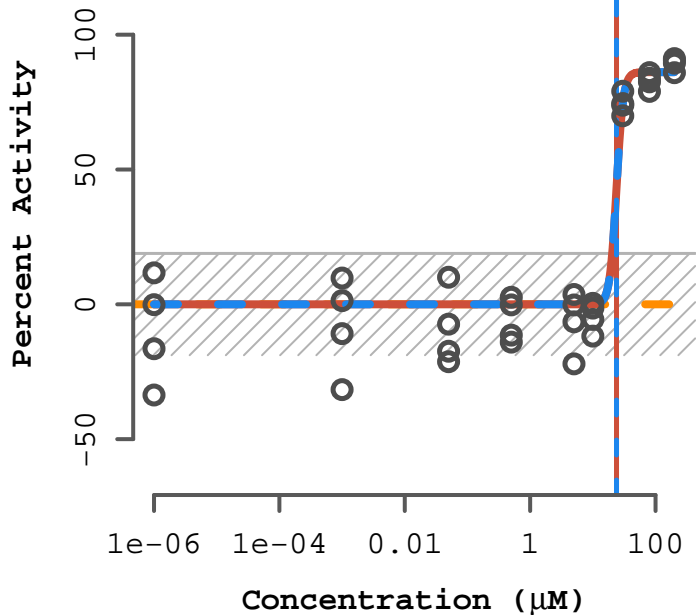

ASSAY: AEID3098 (CCTE\_Deisenroth\_DEVTOX\_RUES2-GLR\_Cel.

NAME: 6-aminopyridine-3-carboxamide

CHID: 51446 CASRN: 329-89-5

SPID(S): ES211\_7\_7

M4ID: 42676203

HILL MODEL (in red):

|      | tp   | ga     | gw   |
|------|------|--------|------|
| val: | 86.1 | 1.38   | 8    |
| sd:  | 2.81 | 0.0859 | 6.72 |

GAIN-LOSS MODEL (in blue):

|      | tp   | ga     | gw   | la    | lw     |
|------|------|--------|------|-------|--------|
| val: | 86.1 | 1.38   | 8    | 3.47  | 10.5   |
| sd:  | 2.81 | 0.0859 | 6.72 | 27100 | 242000 |

|       | CNST   | HILL   | GNLS   |
|-------|--------|--------|--------|
| AIC:  | 384.81 | 282.85 | 286.85 |
| PROB: | 0      | 0.88   | 0.12   |
| RMSE: | 48.93  | 11.64  | 11.64  |

MAX\_MEAN: 89.2 MAX\_MED: 89.9 BMAD: 6.29

COFF: 18.9 HIT-CALL: 1 FITC: 41 ACTP: 1

FLAGS:

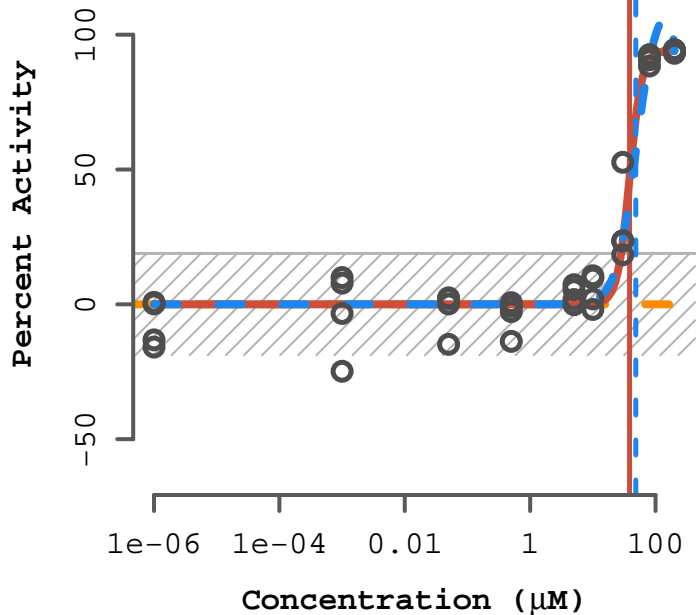

ASSAY: AEID3098 (CCTE\_Deisenroth\_DEVTOX\_RUES2-GLR\_Cel.

NAME: Esomeprazole magnesium hydrate

CHID: 746660 CASRN: 668985-31-7

SPID(S): ES211\_43\_43

M4ID: 42676190

HILL MODEL (in red):

|      | tp   | ga     | gw   |
|------|------|--------|------|
| val: | 94.2 | 1.59   | 4.43 |
| sd:  | 2.43 | 0.0288 | 1.01 |

GAIN-LOSS MODEL (in blue):

|      | tp   | ga    | gw   | la   | lw   |
|------|------|-------|------|------|------|
| val: | 113  | 1.69  | 2.76 | 2.38 | 9.86 |
| sd:  | 35.9 | 0.152 | 1.25 | 0.01 | 10.1 |

|       | CNST   | HILL   | GNLS   |
|-------|--------|--------|--------|
| AIC:  | 373.34 | 257.77 | 260.63 |
| PROB: | 0      | 0.81   | 0.19   |
| RMSE: | 45.47  | 8.86   | 8.75   |

MAX\_MEAN: 93.9      MAX\_MED: 94      BMAD: 6.29

COFF: 18.9      HIT-CALL: 1      FITC: 41      ACTP: 1

FLAGS:

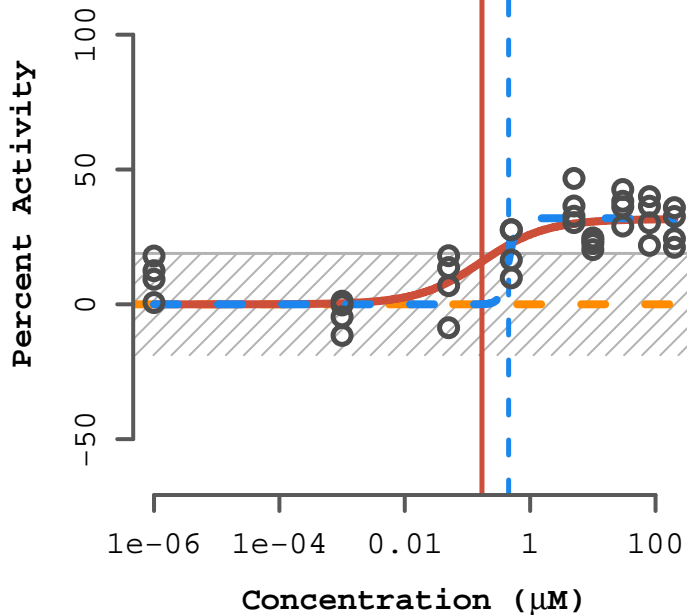

ASSAY: AEID3098 (CCTE\_Deisenroth\_DEVTOX\_RUES2-GLR\_Cel.

NAME: Pomalidomide

CHID: 893458 CASRN: 19171-19-8

SPID(S): ES211\_50\_50

M4ID: 42676235

HILL MODEL (in red):

|      | tp   | ga     | gw    |
|------|------|--------|-------|
| val: | 31.6 | -0.769 | 0.85  |
| sd:  | 2.36 | 0.301  | 0.346 |

GAIN-LOSS MODEL (in blue):

|      | tp   | ga     | gw   | la   | lw  |
|------|------|--------|------|------|-----|
| val: | 31.9 | -0.343 | 6.59 | 2.35 | 18  |
| sd:  | NaN  | NaN    | NaN  | NaN  | NaN |

|       | CNST   | HILL   | GNLS   |
|-------|--------|--------|--------|
| AIC:  | 343.99 | 267.49 | 273.73 |
| PROB: | 0      | 0.96   | 0.04   |
| RMSE: | 25.81  | 8.44   | 8.64   |

MAX\_MEAN: 36.5 MAX\_MED: 37.2 BMAD: 6.29

COFF: 18.9 HIT-CALL: 1 FITC: 41 ACTP: 1

FLAGS: 17

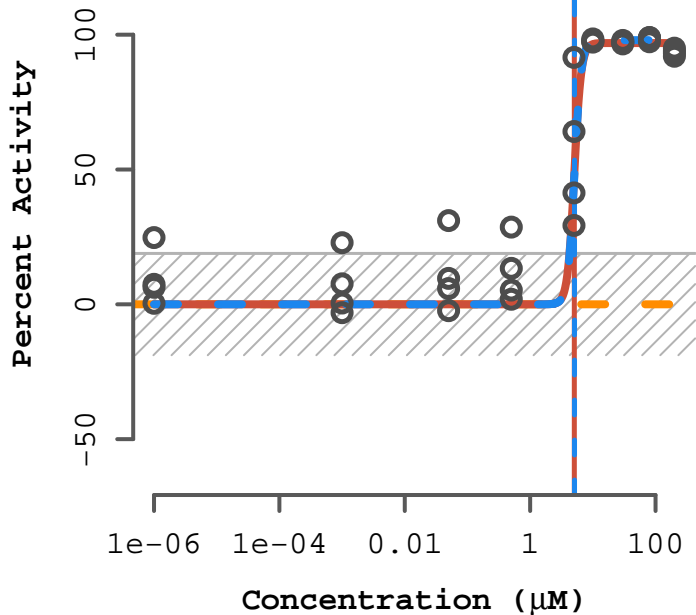

ASSAY: AEID3098 (CCTE\_Deisenroth\_DEVTOX\_RUES2-GLR\_Cel.

NAME: Tegaserod maleate

CHID: 904761 CASRN: 189188-57-6

SPID(S): ES211\_61\_61

M4ID: 42676221

HILL MODEL (in red):

|      | tp   | ga     | gw   |
|------|------|--------|------|
| val: | 96.9 | 0.704  | 8    |
| sd:  | 1.75 | 0.0215 | 5.96 |

GAIN-LOSS MODEL (in blue):

|      | tp  | ga    | gw  | la   | lw   |
|------|-----|-------|-----|------|------|
| val: | 98  | 0.707 | 8   | 2.44 | 9.81 |
| sd:  | NaN | NaN   | NaN | NaN  | NaN  |

|       | CNST   | HILL   | GNLS   |
|-------|--------|--------|--------|
| AIC:  | 413.04 | 283.85 | 286.46 |
| PROB: | 0      | 0.79   | 0.21   |
| RMSE: | 68.38  | 13.12  | 13.14  |

MAX\_MEAN: 98.5 MAX\_MED: 98.8 BMAD: 6.29

COFF: 18.9 HIT-CALL: 1 FITC: 41 ACTP: 1

FLAGS:

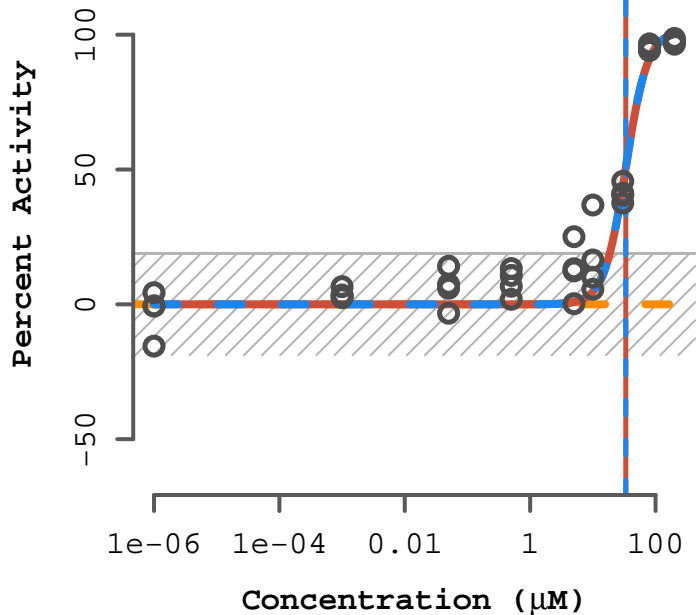

ASSAY: AEID3098 (CCTE\_Deisenroth\_DEVTOX\_RUES2-GLR\_Cel.

NAME: Mianserin hydrochloride

CHID: 944145 CASRN: 21535-47-7

SPID(S): ES211\_47\_47

M4ID: 42676227

HILL MODEL (in red):

|      | tp   | ga     | gw    |
|------|------|--------|-------|
| val: | 101  | 1.53   | 2.5   |
| sd:  | 4.06 | 0.0254 | 0.696 |

GAIN-LOSS MODEL (in blue):

|      | tp  | ga   | gw  | la   | lw   |
|------|-----|------|-----|------|------|
| val: | 101 | 1.53 | 2.5 | 3.32 | 13.2 |
| sd:  | NaN | NaN  | NaN | NaN  | NaN  |

|       | CNST   | HILL   | GNLS   |
|-------|--------|--------|--------|
| AIC:  | 380.54 | 265.92 | 269.92 |
| PROB: | 0      | 0.88   | 0.12   |
| RMSE: | 48.52  | 9.43   | 9.43   |

MAX\_MEAN: 97.6      MAX\_MED: 97.7      BMAD: 6.29

COFF: 18.9      HIT-CALL: 1      FITC: 41      ACTP: 1

FLAGS:

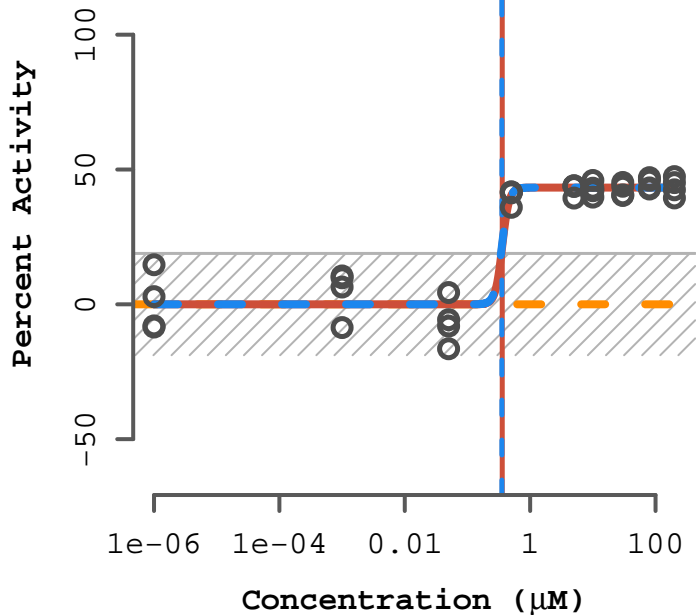

ASSAY: AEID3098 (CCTE\_Deisenroth\_DEVTOX\_RUES2-GLR\_Cel.

NAME: Methotrexate hydrate(1:x)  
 CHID: 1017640 CASRN: 133073-73-1  
 SPID(S): ES211\_45\_45  
 M4ID: 42676185

HILL MODEL (in red):

|      | tp    | ga     | gw   |
|------|-------|--------|------|
| val: | 43.3  | -0.445 | 7.93 |
| sd:  | 0.949 | 3.63   | 200  |

GAIN-LOSS MODEL (in blue):

|      | tp    | ga     | gw   | la   | lw   |
|------|-------|--------|------|------|------|
| val: | 43.3  | -0.451 | 7.64 | 2.86 | 13.1 |
| sd:  | 0.949 | 3.64   | 186  | 210  | 4870 |

|       | CNST   | HILL   | GNLS   |
|-------|--------|--------|--------|
| AIC:  | 367.68 | 234.33 | 238.33 |
| PROB: | 0      | 0.88   | 0.12   |
| RMSE: | 35.4   | 5.79   | 5.79   |

MAX\_MEAN: 44.7      MAX\_MED: 44.6      BMAD: 6.29

COFF: 18.9      HIT-CALL: 1      FITC: 41      ACTP: 1

FLAGS: 17

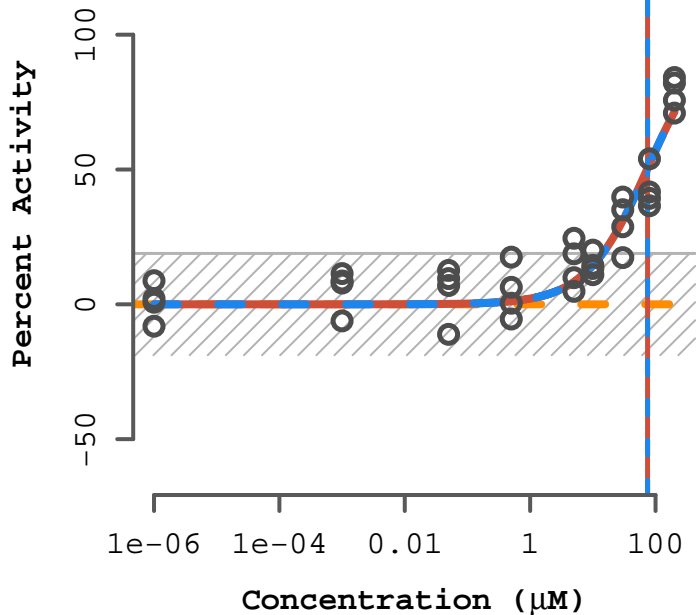

ASSAY: AEID3098 (CCTE\_Deisenroth\_DEVTOX\_RUES2-GLR\_Cel.

NAME: Diphenhydramine hydrochloride

CHID: 20537 CASRN: 147-24-0

SPID(S): ES211\_31\_31

M4ID: 42676209

HILL MODEL (in red):

|      | tp   | ga    | gw    |
|------|------|-------|-------|
| val: | 101  | 1.87  | 0.891 |
| sd:  | 18.2 | 0.201 | 0.15  |

GAIN-LOSS MODEL (in blue):

|      | tp   | ga    | gw    | la   | lw   |
|------|------|-------|-------|------|------|
| val: | 101  | 1.87  | 0.891 | 3.74 | 6.17 |
| sd:  | 18.2 | 0.201 | 0.15  | 1220 | 5210 |

|       | CNST   | HILL   | GNLS   |
|-------|--------|--------|--------|
| AIC:  | 352.61 | 270.72 | 274.72 |
| PROB: | 0      | 0.88   | 0.12   |
| RMSE: | 33.04  | 8.72   | 8.72   |

MAX\_MEAN: 78.2 MAX\_MED: 78.9 BMAD: 6.29

COFF: 18.9 HIT-CALL: 1 FITC: 42 ACTP: 1

FLAGS:



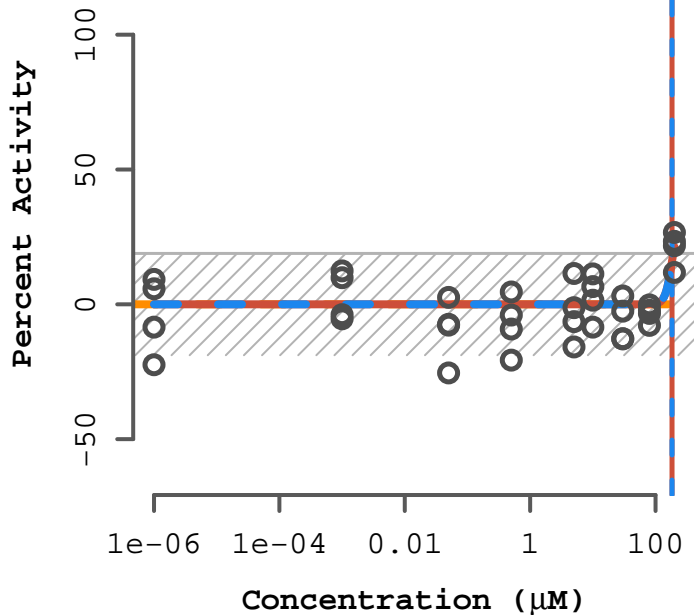

ASSAY: AEID3098 (CCTE\_Deisenroth\_DEVTOX\_RUES2-GLR\_Cel.

NAME: 5,5-Diphenylhydantoin

CHID: 20541 CASRN: 57-41-0

SPID(S): ES211\_3\_3

M4ID: 42676211

HILL MODEL (in red):

|      | tp   | ga    | gw   |
|------|------|-------|------|
| val: | 32   | 2.26  | 8    |
| sd:  | 71.6 | 0.315 | 15.5 |

GAIN-LOSS MODEL (in blue):

|      | tp | ga   | gw | la   | lw |
|------|----|------|----|------|----|
| val: | 32 | 2.26 | 8  | 4.14 | 18 |
| sd:  | NA | NA   | NA | NA   | NA |

|       | CNST   | HILL   | GNLS   |
|-------|--------|--------|--------|
| AIC:  | 285.61 | 276.36 | 280.36 |
| PROB: | 0.01   | 0.87   | 0.12   |
| RMSE: | 12.09  | 9.88   | 9.88   |

MAX\_MEAN: 20.9 MAX\_MED: 22.6 BMAD: 6.29

COFF: 18.9 HIT-CALL: 1 FITC: 42 ACTP: 0.99

FLAGS: 7; 11; 17

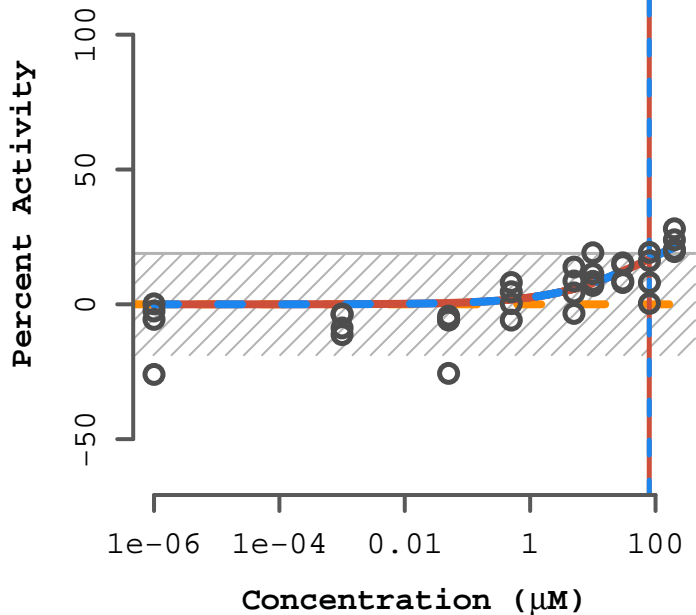

ASSAY: AEID3098 (CCTE\_Deisenroth\_DEVTOX\_RUES2-GLR\_Cel.

NAME: Ibuprofen

CHID: 20732 CASRN: 15687-27-1

SPID(S): ES211\_36\_36

M4ID: 42676187

HILL MODEL (in red):

|      | tp   | ga   | gw    |
|------|------|------|-------|
| val: | 33.6 | 1.9  | 0.569 |
| sd:  | 26   | 1.25 | 0.26  |

GAIN-LOSS MODEL (in blue):

|      | tp   | ga   | gw    | la   | lw   |
|------|------|------|-------|------|------|
| val: | 33.6 | 1.9  | 0.569 | 3.64 | 6.21 |
| sd:  | 26   | 1.25 | 0.26  | 1470 | 6840 |

|       | CNST   | HILL   | GNLS   |
|-------|--------|--------|--------|
| AIC:  | 291.97 | 257.95 | 261.95 |
| PROB: | 0      | 0.88   | 0.12   |
| RMSE: | 13.09  | 8.49   | 8.49   |

MAX\_MEAN: 23 MAX\_MED: 22.2 BMAD: 6.29

COFF: 18.9 HIT-CALL: 1 FITC: 42 ACTP: 1

FLAGS: 7; 11; 17

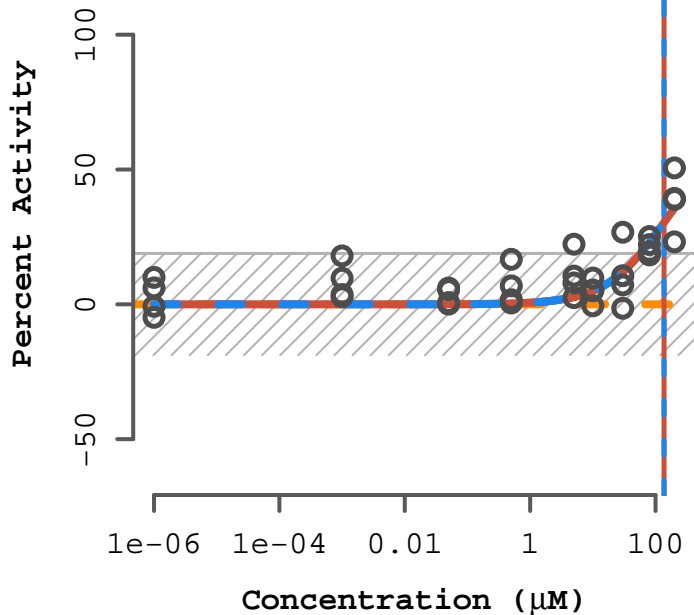

ASSAY: AEID3098 (CCTE\_Deisenroth\_DEVTOX\_RUES2-GLR\_Cel.

NAME: Carbamazepine

CHID: 22731 CASRN: 298-46-4

SPID(S): ES211\_21\_21

M4ID: 42676226

HILL MODEL (in red):

|      | tp   | ga    | gw    |
|------|------|-------|-------|
| val: | 60.7 | 2.14  | 0.924 |
| sd:  | 23.4 | 0.361 | 0.325 |

GAIN-LOSS MODEL (in blue):

|      | tp   | ga   | gw    | la      | lw      |
|------|------|------|-------|---------|---------|
| val: | 60.7 | 2.14 | 0.927 | 3.25    | 18      |
| sd:  | 23.4 | 0.36 | 0.328 | 0.00201 | 2030000 |

|       | CNST   | HILL   | GNLS   |
|-------|--------|--------|--------|
| AIC:  | 306.42 | 260.61 | 264.61 |
| PROB: | 0      | 0.88   | 0.12   |
| RMSE: | 17.24  | 8.11   | 8.11   |

MAX\_MEAN: 38 MAX\_MED: 39.1 BMAD: 6.29

COFF: 18.9 HIT-CALL: 1 FITC: 42 ACTP: 1

FLAGS: 17

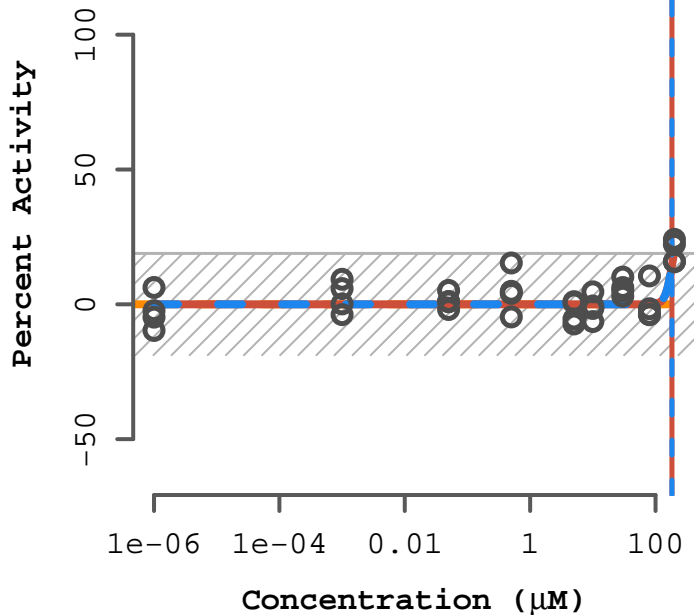

ASSAY: AEID3098 (CCTE\_Deisenroth\_DEVTOX\_RUES2-GLR\_Cel.

NAME: Warfarin

CHID: 23742 CASRN: 81-81-2

SPID(S): ES211\_65\_65

M4ID: 42676231

HILL MODEL (in red):

|      | tp   | ga   | gw  |
|------|------|------|-----|
| val: | 28.9 | 2.26 | 8   |
| sd:  | NaN  | NaN  | NaN |

GAIN-LOSS MODEL (in blue):

|      | tp   | ga   | gw  | la   | lw   |
|------|------|------|-----|------|------|
| val: | 28.9 | 2.26 | 8   | 2.81 | 7.78 |
| sd:  | NaN  | NaN  | NaN | NaN  | NaN  |

|       | CNST   | HILL   | GNLS   |
|-------|--------|--------|--------|
| AIC:  | 256.96 | 237.03 | 241.03 |
| PROB: | 0      | 0.88   | 0.12   |
| RMSE: | 8.62   | 5.65   | 5.65   |

MAX\_MEAN: 19.5 MAX\_MED: 19.1 BMAD: 6.29

COFF: 18.9 HIT-CALL: 1 FITC: 42 ACTP: 1

FLAGS: 7; 11; 17

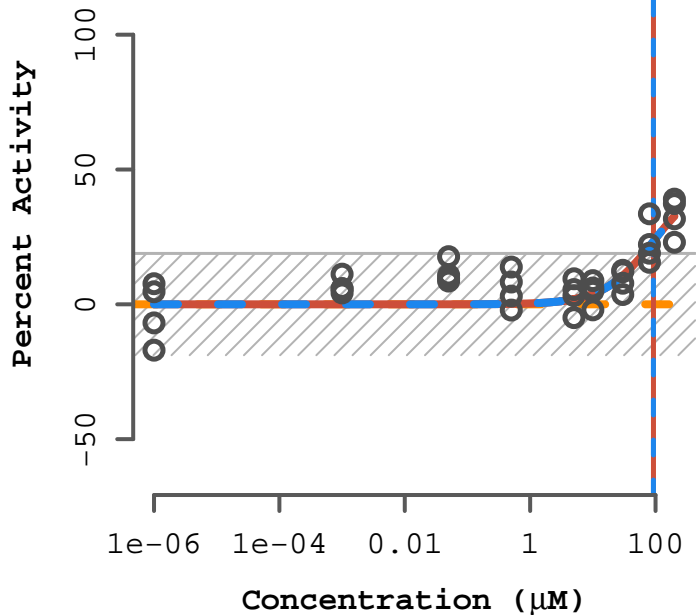

ASSAY: AEID3098 (CCTE\_Deisenroth\_DEVTOX\_RUES2-GLR\_Cel.

NAME: Hydroxyurea

CHID: 25438 CASRN: 127-07-1

SPID(S): ES211\_35\_35

M4ID: 42676204

HILL MODEL (in red):

|      | tp   | ga    | gw    |
|------|------|-------|-------|
| val: | 46.8 | 1.97  | 1.09  |
| sd:  | 20.3 | 0.399 | 0.476 |

GAIN-LOSS MODEL (in blue):

|      | tp   | ga   | gw   | la   | lw   |
|------|------|------|------|------|------|
| val: | 46.8 | 1.97 | 1.09 | 3.77 | 10.3 |
| sd:  | NaN  | NaN  | NaN  | NaN  | NaN  |

|       | CNST   | HILL   | GNLS   |
|-------|--------|--------|--------|
| AIC:  | 301.96 | 259.18 | 263.18 |
| PROB: | 0      | 0.88   | 0.12   |
| RMSE: | 15.68  | 7.6    | 7.6    |

MAX\_MEAN: 32.8 MAX\_MED: 34.6 BMAD: 6.29

COFF: 18.9 HIT-CALL: 1 FITC: 42 ACTP: 1

FLAGS: 17

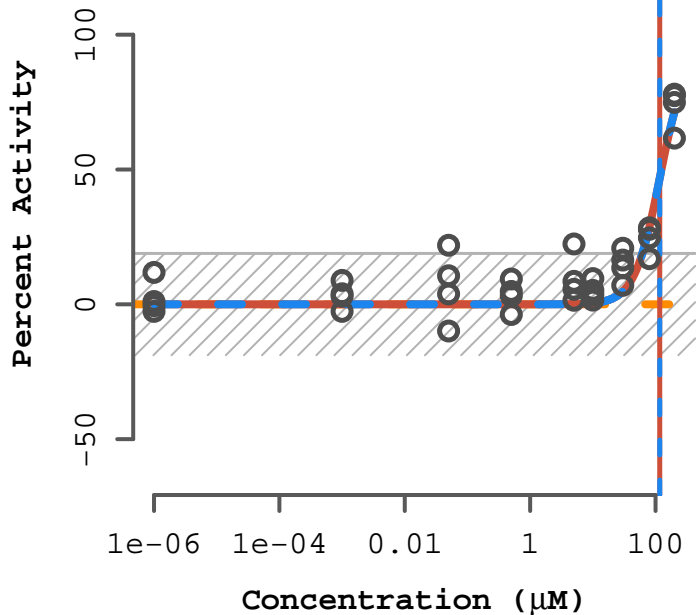

ASSAY: AEID3098 (CCTE\_Deisenroth\_DEVTOX\_RUES2-GLR\_Cel.

NAME: MEHP

CHID: 25680 CASRN: 4376-20-9

SPID(S): ES211\_44\_44

M4ID: 42676200

HILL MODEL (in red):

|      |      |       |       |
|------|------|-------|-------|
|      | tp   | ga    | gw    |
| val: | 93.6 | 2.07  | 2.15  |
| sd:  | 19.9 | 0.102 | 0.859 |

GAIN-LOSS MODEL (in blue):

|      |      |       |       |        |        |
|------|------|-------|-------|--------|--------|
|      | tp   | ga    | gw    | la     | lw     |
| val: | 93.6 | 2.07  | 2.15  | 4.3    | 6.49   |
| sd:  | 20   | 0.102 | 0.862 | 161000 | 509000 |

|       |        |        |        |
|-------|--------|--------|--------|
|       | CNST   | HILL   | GNLS   |
| AIC:  | 329.82 | 265.02 | 269.02 |
| PROB: | 0      | 0.88   | 0.12   |
| RMSE: | 27.25  | 8.56   | 8.56   |

MAX\_MEAN: 73 MAX\_MED: 76.2 BMAD: 6.29

COFF: 18.9 HIT-CALL: 1 FITC: 42 ACTP: 1

FLAGS:

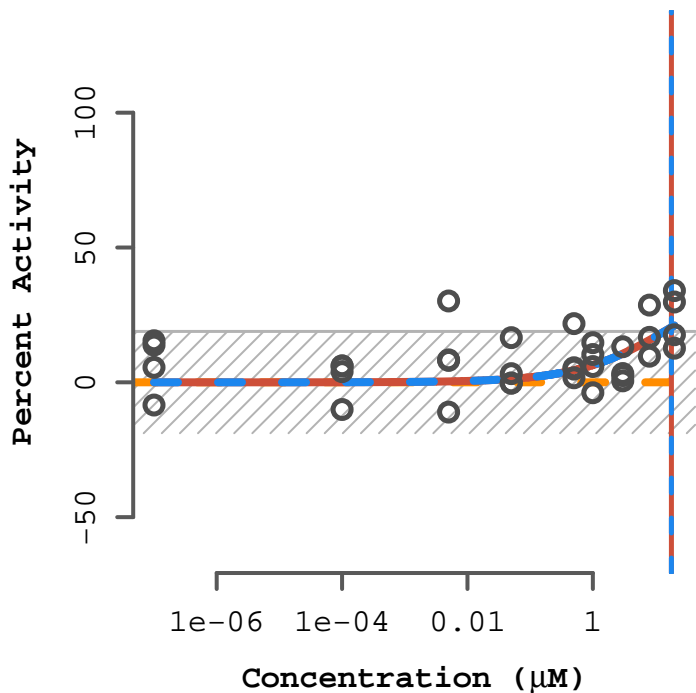

ASSAY: AEID3098 (CCTE\_Deisenroth\_DEVTOX\_RUES2-GLR\_Cel.

NAME: Dexamethasone sodium phosphate

CHID: 47429 CASRN: 2392-39-4

SPID(S): ES211\_28\_28

M4ID: 42676228

HILL MODEL (in red):

|      | tp   | ga   | gw    |
|------|------|------|-------|
| val: | 40.8 | 1.25 | 0.584 |
| sd:  | 31   | 1.09 | 0.384 |

GAIN-LOSS MODEL (in blue):

|      | tp   | ga   | gw    | la   | lw   |
|------|------|------|-------|------|------|
| val: | 40.8 | 1.25 | 0.584 | 2.32 | 7.45 |
| sd:  | 31   | 1.09 | 0.384 | 816  | 5950 |

|       | CNST   | HILL   | GNLS   |
|-------|--------|--------|--------|
| AIC:  | 287.46 | 268.16 | 272.16 |
| PROB: | 0      | 0.88   | 0.12   |
| RMSE: | 14.13  | 9.81   | 9.81   |

MAX\_MEAN: 23.5 MAX\_MED: 23.7 BMAD: 6.29

COFF: 18.9 HIT-CALL: 1 FITC: 42 ACTP: 1

FLAGS: 7; 17

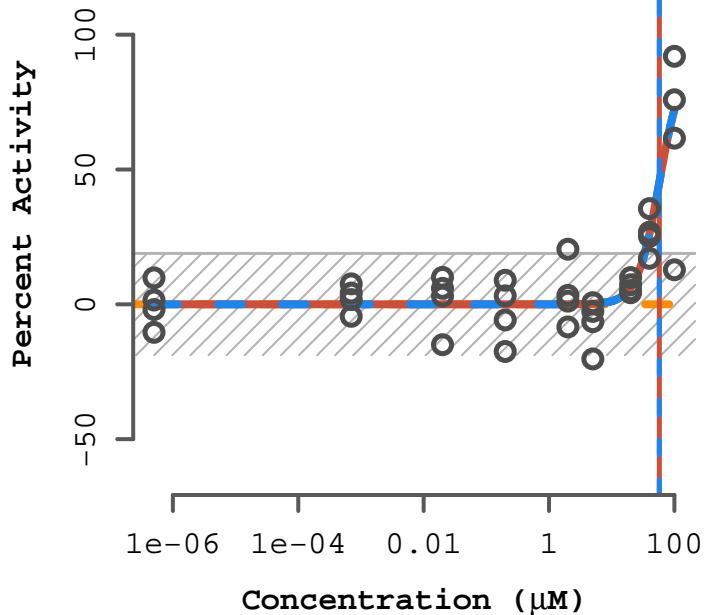

ASSAY: AEID3098 (CCTE\_Deisenroth\_DEVTOX\_RUES2-GLR\_Cel.

NAME: Ketanserin tartrate

CHID: 1003945 CASRN: 83846-83-7

SPID(S): ES211\_40\_40

M4ID: 42676230

HILL MODEL (in red):

|      | tp   | ga    | gw    |
|------|------|-------|-------|
| val: | 90.5 | 1.76  | 2.48  |
| sd:  | 29.2 | 0.159 | 0.988 |

GAIN-LOSS MODEL (in blue):

|      | tp   | ga    | gw    | la   | lw   |
|------|------|-------|-------|------|------|
| val: | 90.5 | 1.76  | 2.48  | 2.92 | 6.08 |
| sd:  | 29.3 | 0.159 | 0.988 | 471  | 3140 |

|       | CNST   | HILL   | GNLS   |
|-------|--------|--------|--------|
| AIC:  | 320.52 | 280.78 | 284.78 |
| PROB: | 0      | 0.88   | 0.12   |
| RMSE: | 25.47  | 13.24  | 13.24  |

MAX\_MEAN: 60.6      MAX\_MED: 68.7      BMAD: 6.29

COFF: 18.9      HIT-CALL: 1      FITC: 42      ACTP: 1

FLAGS:



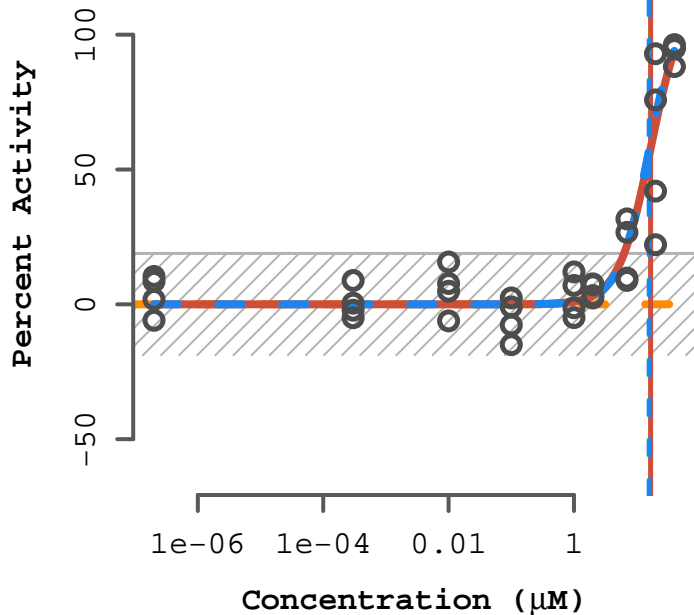

ASSAY: AEID3098 (CCTE\_Deisenroth\_DEVTOX\_RUES2-GLR\_Cel.

NAME: Dorsomorphin

CHID: 1006988 CASRN: 866405-64-3

SPID(S): ES211\_6\_6

M4ID: 42676189

HILL MODEL (in red):

|      | tp   | ga    | gw   |
|------|------|-------|------|
| val: | 116  | 1.22  | 1.68 |
| sd:  | 50.6 | 0.377 | 1.03 |

GAIN-LOSS MODEL (in blue):

|      | tp   | ga    | gw    | la    | lw   |
|------|------|-------|-------|-------|------|
| val: | 115  | 1.2   | 1.79  | 1.81  | 7.4  |
| sd:  | 75.3 | 0.329 | 0.813 | 0.999 | 30.6 |

|       | CNST   | HILL   | GNLS  |
|-------|--------|--------|-------|
| AIC:  | 356.44 | 280.32 | 284.3 |
| PROB: | 0      | 0.88   | 0.12  |
| RMSE: | 39.1   | 11.85  | 12.11 |

MAX\_MEAN: 93.7      MAX\_MED: 95.1      BMAD: 6.29

COFF: 18.9      HIT-CALL: 1      FITC: 42      ACTP: 1

FLAGS:

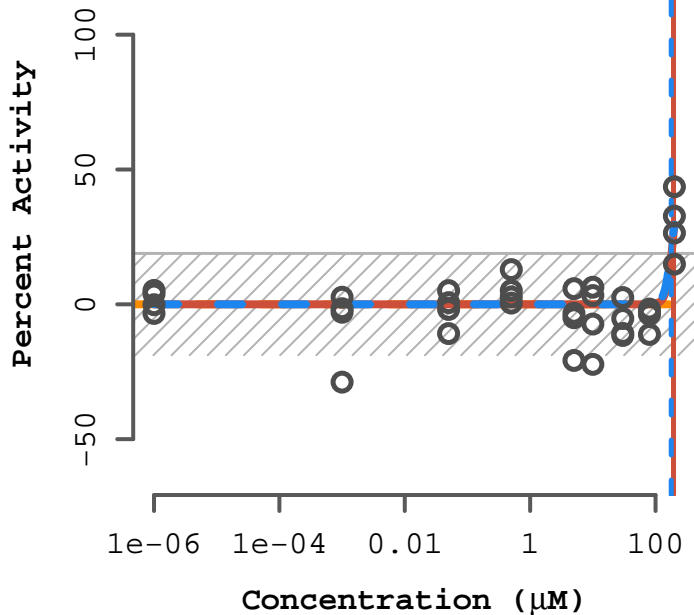

ASSAY: AEID3098 (CCTE\_Deisenroth\_DEVTOX\_RUES2-GLR\_Cel.

NAME: (2R,3S)-2-(3,4-Dihydroxyphenyl)-3,4-dihydro-2H-

CHID: 1017388 CASRN: 225937-10-0

SPID(S): ES211\_22\_22

M4ID: 42676181

HILL MODEL (in red):

|      | tp   | ga     | gw   |
|------|------|--------|------|
| val: | 52.3 | 2.29   | 8    |
| sd:  | 37.6 | 0.0849 | 8.75 |

GAIN-LOSS MODEL (in blue):

|      | tp   | ga   | gw | la   | lw   |
|------|------|------|----|------|------|
| val: | 41.1 | 2.25 | 8  | 4.29 | 16.3 |
| sd:  | NA   | NA   | NA | NA   | NA   |

|       | CNST   | HILL   | GNLS   |
|-------|--------|--------|--------|
| AIC:  | 285.31 | 268.41 | 272.43 |
| PROB: | 0      | 0.88   | 0.12   |
| RMSE: | 13.62  | 9.46   | 9.46   |

MAX\_MEAN: 29.4 MAX\_MED: 29.6 BMAD: 6.29

COFF: 18.9 HIT-CALL: 1 FITC: 42 ACTP: 1

FLAGS: 7; 17

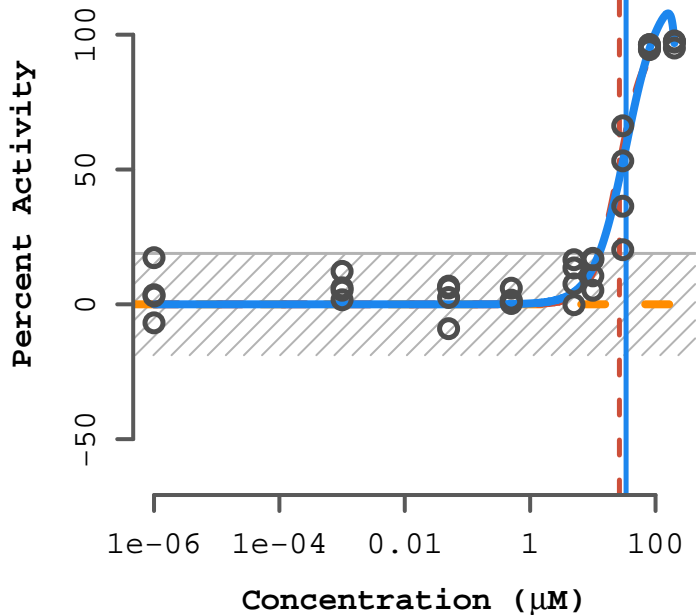

ASSAY: AEID3098 (CCTE\_Deisenroth\_DEVTOX\_RUES2-GLR\_Cel.

NAME: Retinol

CHID: 23556 CASRN: 68-26-8

SPID(S): ES211\_51\_51

M4ID: 42676178

HILL MODEL (in red):

|      | tp   | ga     | gw    |
|------|------|--------|-------|
| val: | 101  | 1.42   | 2.05  |
| sd:  | 3.27 | 0.0453 | 0.286 |

GAIN-LOSS MODEL (in blue):

|      | tp  | ga    | gw   | la     | lw   |
|------|-----|-------|------|--------|------|
| val: | 117 | 1.53  | 1.67 | 2.37   | 11.7 |
| sd:  | 14  | 0.097 | 0.29 | 0.0104 | 4.21 |

|       | CNST   | HILL   | GNLS |
|-------|--------|--------|------|
| AIC:  | 379.94 | 262.48 | 261  |
| PROB: | 0      | 0.32   | 0.68 |
| RMSE: | 48.58  | 9.37   | 8.59 |

MAX\_MEAN: 96.9 MAX\_MED: 97.3 BMAD: 6.29

COFF: 18.9 HIT-CALL: 1 FITC: 50 ACTP: 1

FLAGS: 19

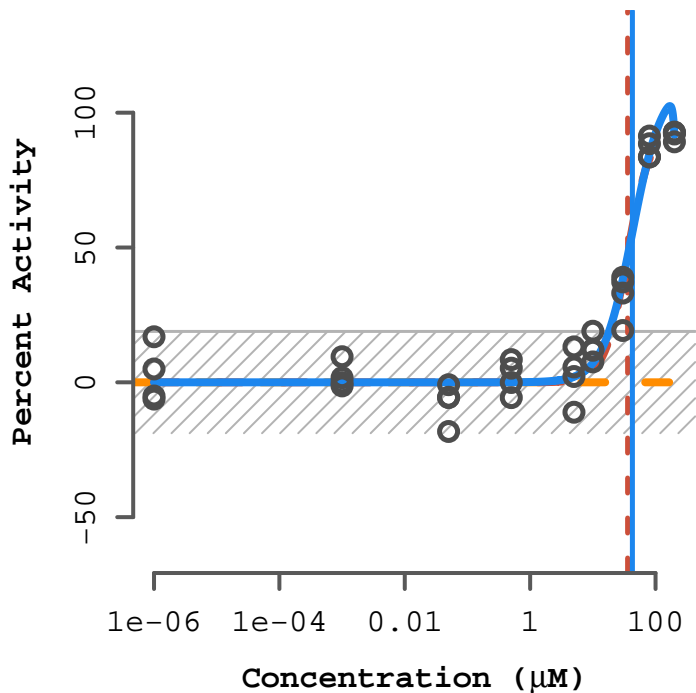

ASSAY: AEID3098 (CCTE\_Deisenroth\_DEVTOX\_RUES2-GLR\_Cel.

NAME: Rifampicin

CHID: 21244 CASRN: 13292-46-1

SPID(S): ES211\_52\_52

M4ID: 42676236

HILL MODEL (in red):

|      | tp   | ga     | gw    |
|------|------|--------|-------|
| val: | 95.4 | 1.55   | 2.36  |
| sd:  | 3.93 | 0.0295 | 0.581 |

GAIN-LOSS MODEL (in blue):

|      | tp   | ga     | gw    | la      | lw   |
|------|------|--------|-------|---------|------|
| val: | 111  | 1.63   | 1.85  | 2.35    | 17.5 |
| sd:  | 14.6 | 0.0771 | 0.358 | 0.00657 | 6.56 |

|       | CNST   | HILL   | GNLS   |
|-------|--------|--------|--------|
| AIC:  | 372.07 | 257.11 | 255.65 |
| PROB: | 0      | 0.33   | 0.67   |
| RMSE: | 44.16  | 7.72   | 7.35   |

MAX\_MEAN: 91.7 MAX\_MED: 92.4 BMAD: 6.29

COFF: 18.9 HIT-CALL: 1 FITC: 51 ACTP: 1

FLAGS: 19
