# Supplementary material for: The DevTox Germ Layer Reporter Platform: An Assay Adaptation of the Human Pluripotent Stem Cell Test
Source: MDPI journal article supplement (doi:10.3390/toxics10070392), 2022-07-13
Supplement: s1 [file s1]

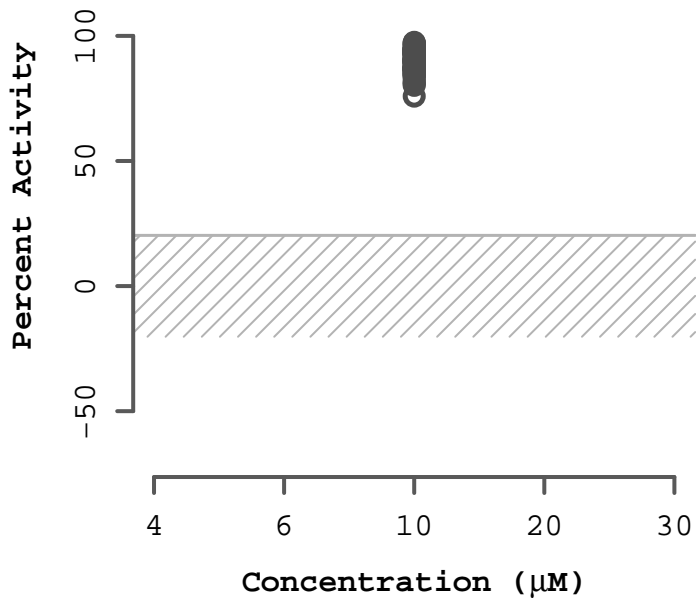

ASSAY: AEID3094 (CCTE\_Deisenroth\_DEVTOX\_RUES2-GLR\_Sox)

NAME: SB-431542

CHID: 42693 CASRN: 301836-41-9

SPID(S): ES211\_56\_56

M4ID: 42675915

HILL MODEL: Not applicable.

GAIN-LOSS MODEL: Not applicable.

|       | CNST | HILL | GNLS |
|-------|------|------|------|
| AIC:  | NA   | NA   | NA   |
| PROB: | NA   | NA   | NA   |
| RMSE: | NA   | NA   | NA   |

MAX\_MEAN: 90 MAX\_MED: 90.4 BMAD: 6.75

COFF: 20.3 HIT-CALL: -1 FITC: 2 ACTP: NA

FLAGS:

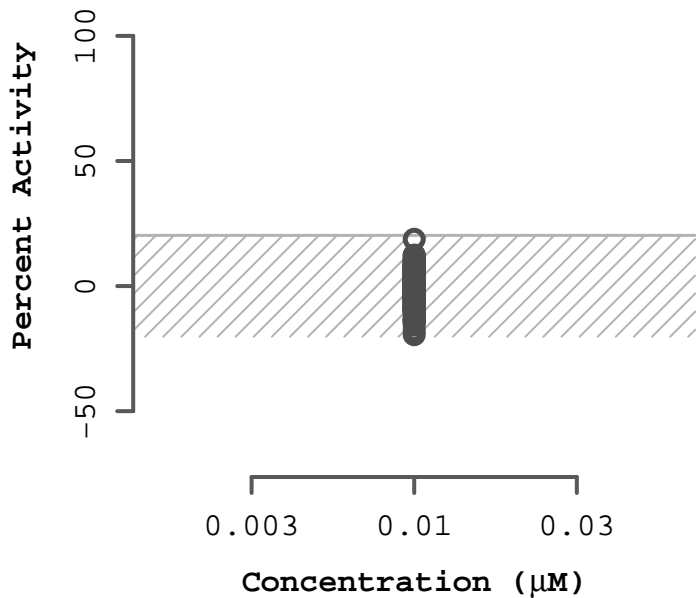

ASSAY: AEID3094 (CCTE\_Deisenroth\_DEVTOX\_RUES2-GLR\_Sox)

NAME: DMSO (spid not in DB)

CHID: NA CASRN: NA

SPID(S): DMSO

M4ID: 42675908

HILL MODEL: Not applicable.

GAIN-LOSS MODEL: Not applicable.

|       | CNST | HILL | GNLS |
|-------|------|------|------|
| AIC:  | NA   | NA   | NA   |
| PROB: | NA   | NA   | NA   |
| RMSE: | NA   | NA   | NA   |

MAX\_MEAN: -0.5 MAX\_MED: 5.73e-15 BMAD: 6.75

COFF: 20.3 HIT-CALL: -1 FITC: 2 ACTP: NA

FLAGS:

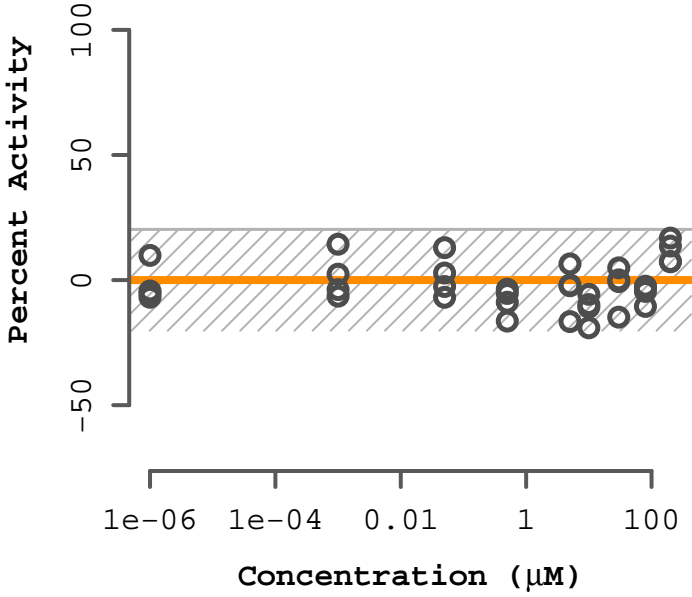

ASSAY: AEID3094 (CCTE\_Deisenroth\_DEVTOX\_RUES2-GLR\_Sox)

NAME: Acetaminophen

CHID: 20006 CASRN: 103-90-2

SPID(S): ES211\_9\_9

M4ID: 42675925

HILL MODEL: Not applicable.

GAIN-LOSS MODEL: Not applicable.

|       |        |      |      |
|-------|--------|------|------|
|       | CNST   | HILL | GNLS |
| AIC:  | 266.51 | NA   | NA   |
| PROB: | 1      | NA   | NA   |
| RMSE: | 9.09   | NA   | NA   |

MAX\_MEAN: 11.3      MAX\_MED: 10.5      BMAD: 6.75

COFF: 20.3      HIT-CALL: 0      FITC: 4      ACTP: 0

FLAGS:

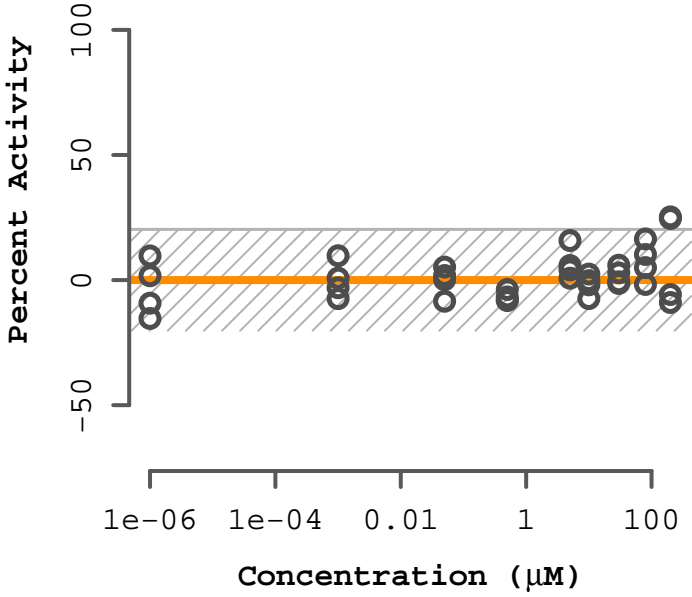

ASSAY: AEID3094 (CCTE\_Deisenroth\_DEVTOX\_RUES2-GLR\_Sox)

NAME: Acrylamide  
CHID: 20027 CASRN: 79-06-1  
SPID(S): ES211\_10\_10  
M4ID: 42675945

HILL MODEL: Not applicable.

GAIN-LOSS MODEL: Not applicable.

|       |        |      |      |
|-------|--------|------|------|
|       | CNST   | HILL | GNLS |
| AIC:  | 262.31 | NA   | NA   |
| PROB: | 1      | NA   | NA   |
| RMSE: | 9.19   | NA   | NA   |

MAX\_MEAN: 8.79      MAX\_MED: 9.42      BMAD: 6.75

COFF: 20.3      HIT-CALL: 0      FITC: 4      ACTP: 0

FLAGS:

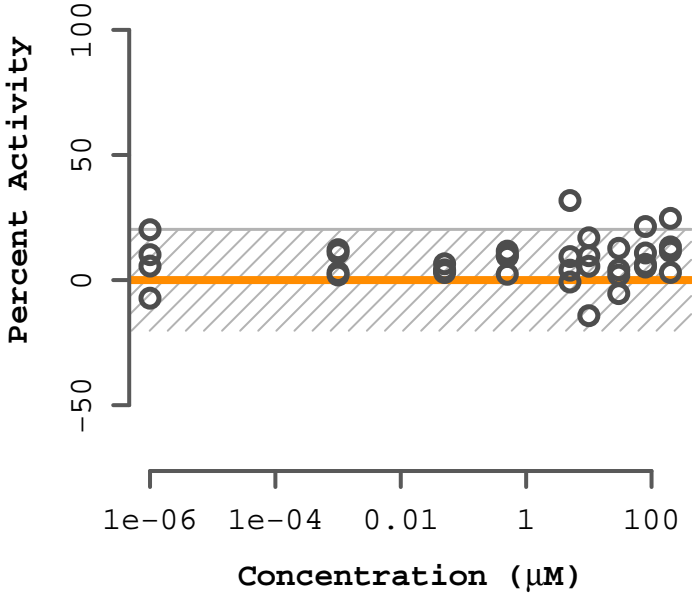

ASSAY: AEID3094 (CCTE\_Deisenroth\_DEVTOX\_RUES2-GLR\_Sox)

NAME: Aspirin  
CHID: 20108 CASRN: 50-78-2  
SPID(S): ES211\_15\_15  
M4ID: 42675937

HILL MODEL: Not applicable.

GAIN-LOSS MODEL: Not applicable.

|       |        |      |      |
|-------|--------|------|------|
|       | CNST   | HILL | GNLS |
| AIC:  | 281.49 | NA   | NA   |
| PROB: | 1      | NA   | NA   |
| RMSE: | 11.54  | NA   | NA   |

MAX\_MEAN: 13.1      MAX\_MED: 12.4      BMAD: 6.75

COFF: 20.3      HIT-CALL: 0      FITC: 4      ACTP: 0

FLAGS:

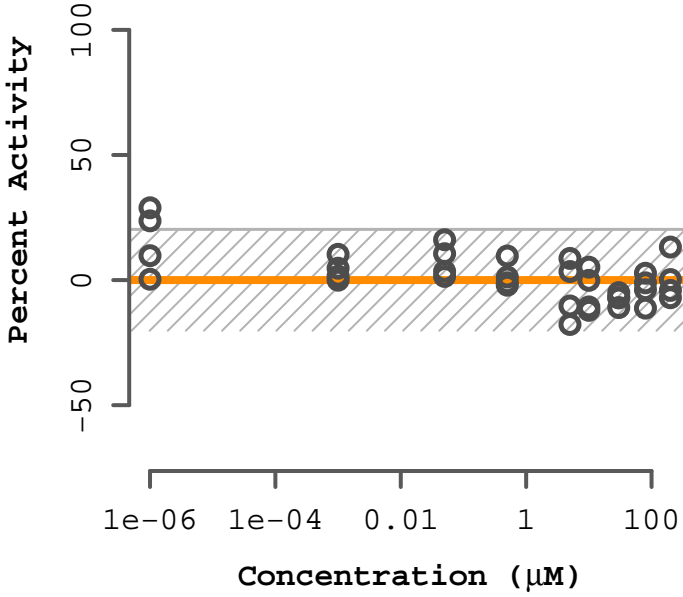

ASSAY: AEID3094 (CCTE\_Deisenroth\_DEVTOX\_RUES2-GLR\_Sox)

NAME: Boric acid ( $\text{H}_3\text{BO}_3$ )

CHID: 20194 CASRN: 10043-35-3

SPID(S): ES211\_17\_17

M4ID: 42675931

HILL MODEL: Not applicable.

GAIN-LOSS MODEL: Not applicable.

|       |       |      |      |
|-------|-------|------|------|
|       | CNST  | HILL | GNLS |
| AIC:  | 268.7 | NA   | NA   |
| PROB: | 1     | NA   | NA   |
| RMSE: | 9.92  | NA   | NA   |

MAX\_MEAN: 15.7 MAX\_MED: 16.7 BMAD: 6.75

COFF: 20.3 HIT-CALL: 0 FITC: 4 ACTP: 0

FLAGS:

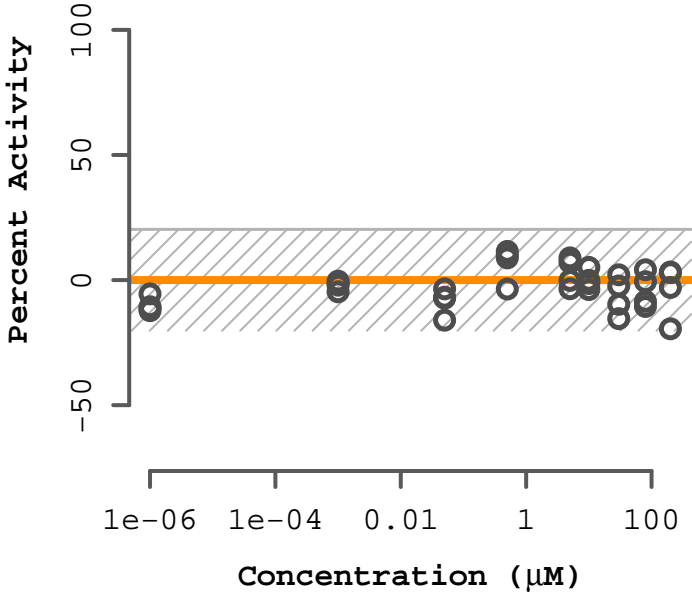

ASSAY: AEID3094 (CCTE\_Deisenroth\_DEVTOX\_RUES2-GLR\_Sox)

NAME: Caffeine

CHID: 20232 CASRN: 58-08-2

SPID(S): ES211\_20\_20

M4ID: 42675953

HILL MODEL: Not applicable.

GAIN-LOSS MODEL: Not applicable.

|       |        |      |      |
|-------|--------|------|------|
|       | CNST   | HILL | GNLS |
| AIC:  | 255.63 | NA   | NA   |
| PROB: | 1      | NA   | NA   |
| RMSE: | 7.94   | NA   | NA   |

MAX\_MEAN: 6.68      MAX\_MED: 9.41      BMAD: 6.75

COFF: 20.3      HIT-CALL: 0      FITC: 4      ACTP: 0

FLAGS:

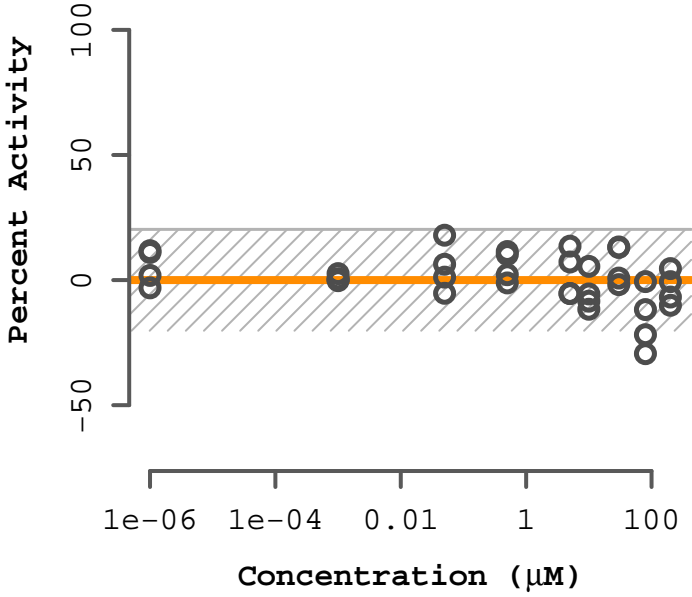

ASSAY: AEID3094 (CCTE\_Deisenroth\_DEVTOX\_RUES2-GLR\_Sox)

NAME: Ethylene glycol  
CHID: 20597 CASRN: 107-21-1  
SPID(S): ES211\_32\_32  
M4ID: 42675946

HILL MODEL: Not applicable.

GAIN-LOSS MODEL: Not applicable.

|       |        |      |      |
|-------|--------|------|------|
|       | CNST   | HILL | GNLS |
| AIC:  | 268.12 | NA   | NA   |
| PROB: | 1      | NA   | NA   |
| RMSE: | 9.82   | NA   | NA   |

MAX\_MEAN: 6.33      MAX\_MED: 6.93      BMAD: 6.75

COFF: 20.3      HIT-CALL: 0      FITC: 4      ACTP: 0

FLAGS:



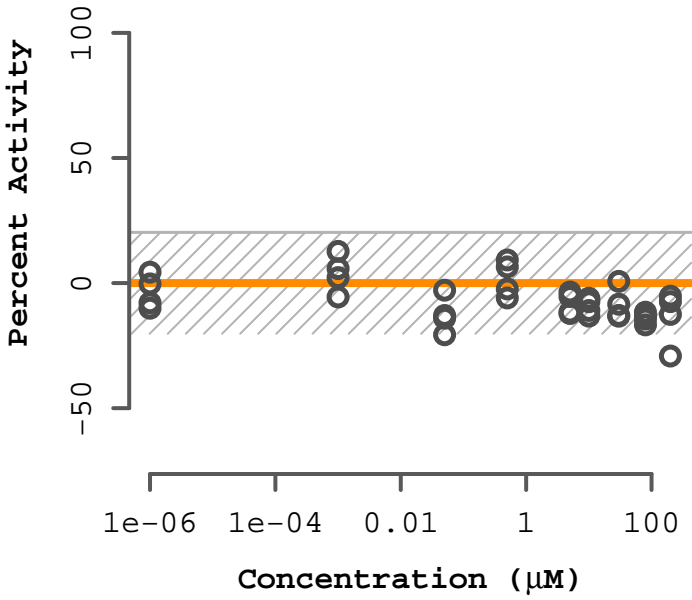

ASSAY: AEID3094 (CCTE\_Deisenroth\_DEVTOX\_RUES2-GLR\_Sox)

NAME: Isoniazid

CHID: 20755 CASRN: 54-85-3

SPID(S): ES211\_39\_39

M4ID: 42675939

HILL MODEL: Not applicable.

GAIN-LOSS MODEL: Not applicable.

|       |        |      |      |
|-------|--------|------|------|
|       | CNST   | HILL | GNLS |
| AIC:  | 280.85 | NA   | NA   |
| PROB: | 1      | NA   | NA   |
| RMSE: | 11.04  | NA   | NA   |

MAX\_MEAN: 3.77      MAX\_MED: 3.99      BMAD: 6.75

COFF: 20.3      HIT-CALL: 0      FITC: 4      ACTP: 0

FLAGS:

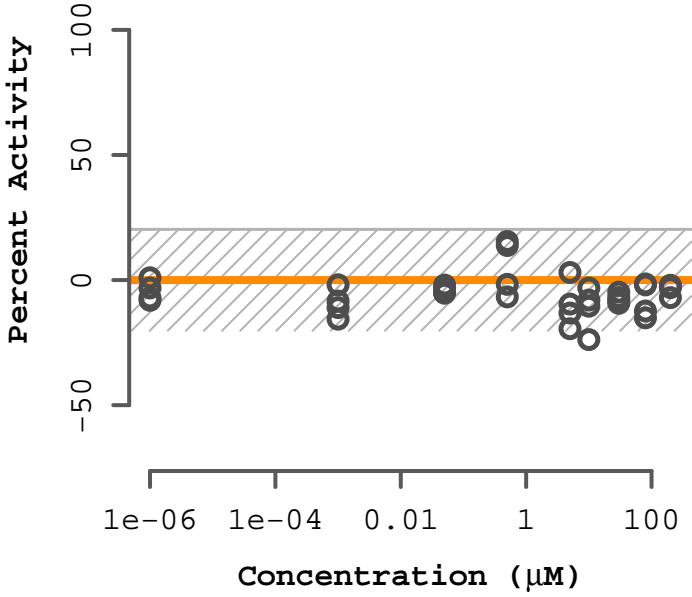

ASSAY: AEID3094 (CCTE\_Deisenroth\_DEVTOX\_RUES2-GLR\_Sox)

NAME: Nicotinic acid  
CHID: 20932 CASRN: 59-67-6  
SPID(S): ES211\_48\_48  
M4ID: 42675924

HILL MODEL: Not applicable.

GAIN-LOSS MODEL: Not applicable.

|       |        |      |      |
|-------|--------|------|------|
|       | CNST   | HILL | GNLS |
| AIC:  | 267.87 | NA   | NA   |
| PROB: | 1      | NA   | NA   |
| RMSE: | 9.41   | NA   | NA   |

MAX\_MEAN: 5.21      MAX\_MED: 6.06      BMAD: 6.75

COFF: 20.3      HIT-CALL: 0      FITC: 4      ACTP: 0

FLAGS:

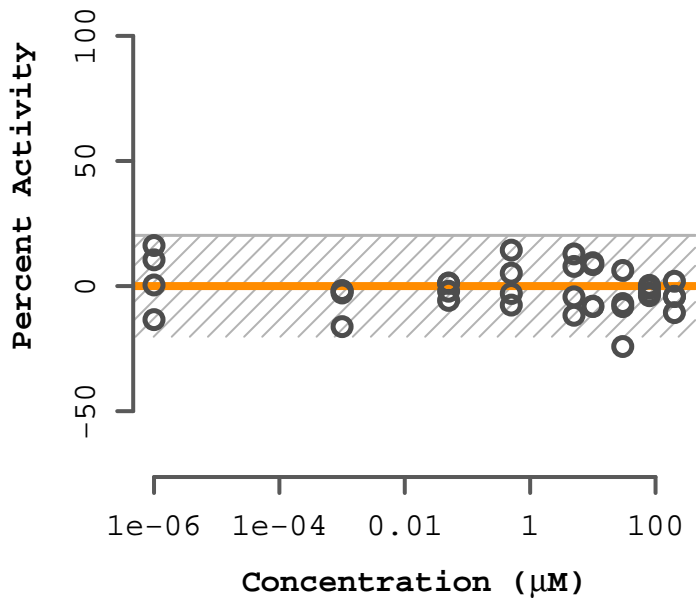

ASSAY: AEID3094 (CCTE\_Deisenroth\_DEVTOX\_RUES2-GLR\_Sox)

NAME: 1,2-Propylene glycol

CHID: 21206 CASRN: 57-55-6

SPID(S): ES211\_1\_1

M4ID: 42675907

HILL MODEL: Not applicable.

GAIN-LOSS MODEL: Not applicable.

|       | CNST   | HILL | GNLS |
|-------|--------|------|------|
| AIC:  | 261.77 | NA   | NA   |
| PROB: | 1      | NA   | NA   |
| RMSE: | 8.75   | NA   | NA   |

MAX\_MEAN: 3.45 MAX\_MED: 5.48 BMAD: 6.75

COFF: 20.3 HIT-CALL: 0 FITC: 4 ACTP: 0

FLAGS:

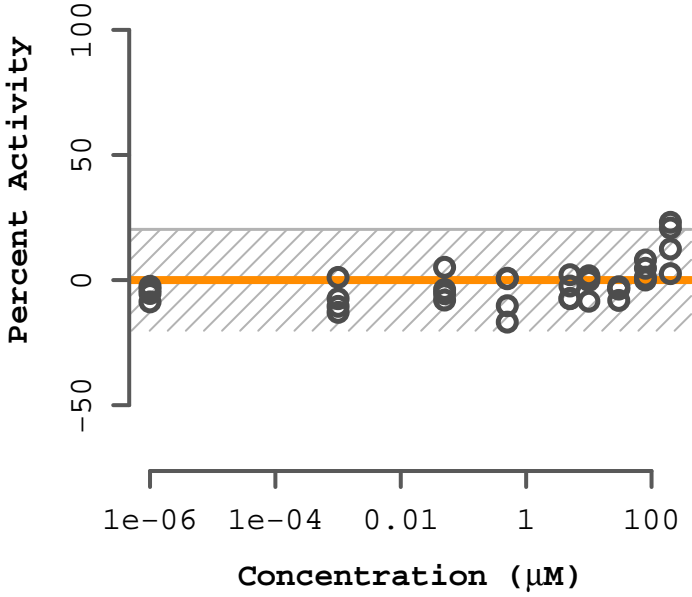

ASSAY: AEID3094 (CCTE\_Deisenroth\_DEVTOX\_RUES2-GLR\_Sox)

NAME: 6-Propyl-2-thiouracil

CHID: 21209 CASRN: 51-52-5

SPID(S): ES211\_8\_8

M4ID: 42675926

HILL MODEL: Not applicable.

GAIN-LOSS MODEL: Not applicable.

|       |        |      |      |
|-------|--------|------|------|
|       | CNST   | HILL | GNLS |
| AIC:  | 255.62 | NA   | NA   |
| PROB: | 1      | NA   | NA   |
| RMSE: | 8.32   | NA   | NA   |

MAX\_MEAN: 14.7      MAX\_MED: 16.6      BMAD: 6.75

COFF: 20.3      HIT-CALL: 0      FITC: 4      ACTP: 0

FLAGS:

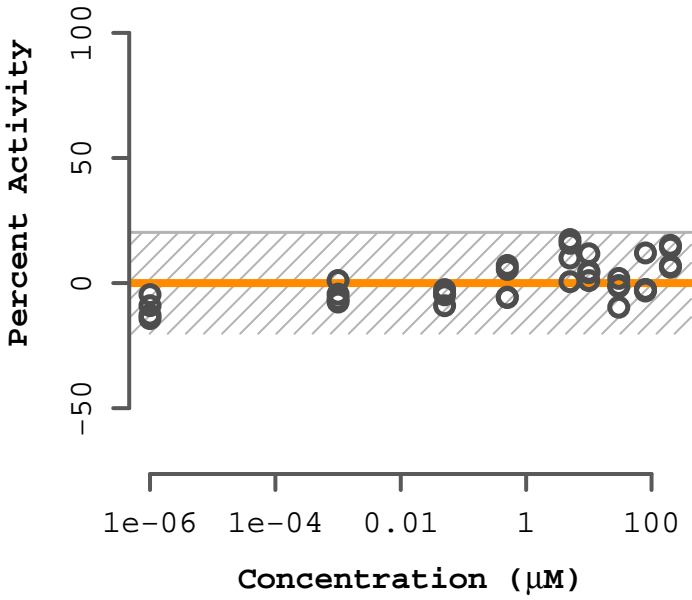

ASSAY: AEID3094 (CCTE\_Deisenroth\_DEVTOX\_RUES2-GLR\_Sox)

NAME: Saccharin

CHID: 21251 CASRN: 81-07-2

SPID(S): ES211\_54\_54

M4ID: 42675919

HILL MODEL: Not applicable.

GAIN-LOSS MODEL: Not applicable.

|       |        |      |      |
|-------|--------|------|------|
|       | CNST   | HILL | GNLS |
| AIC:  | 260.05 | NA   | NA   |
| PROB: | 1      | NA   | NA   |
| RMSE: | 8.31   | NA   | NA   |

MAX\_MEAN: 11 MAX\_MED: 13 BMAD: 6.75

COFF: 20.3 HIT-CALL: 0 FITC: 4 ACTP: 0

FLAGS:

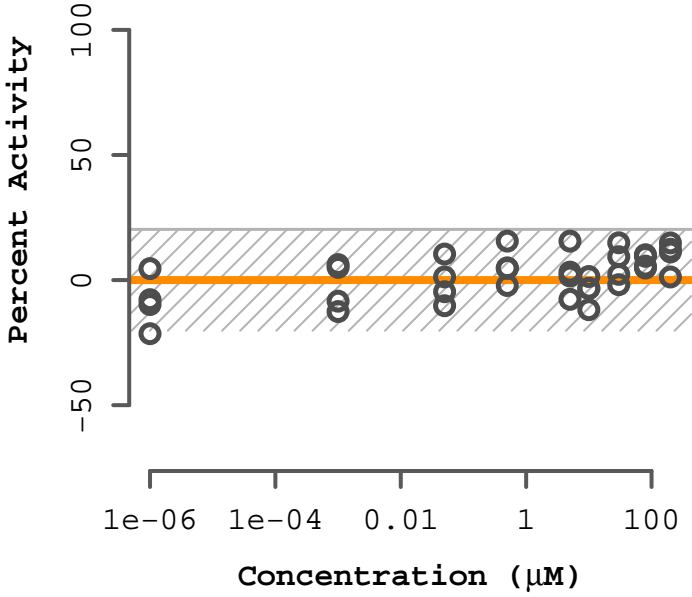

ASSAY: AEID3094 (CCTE\_Deisenroth\_DEVTOX\_RUES2-GLR\_Sox)

NAME: Sulfasalazine  
CHID: 21256 CASRN: 599-79-1  
SPID(S): ES211\_59\_59  
M4ID: 42675928

HILL MODEL: Not applicable.

GAIN-LOSS MODEL: Not applicable.

|       |        |      |      |
|-------|--------|------|------|
|       | CNST   | HILL | GNLS |
| AIC:  | 267.25 | NA   | NA   |
| PROB: | 1      | NA   | NA   |
| RMSE: | 9.14   | NA   | NA   |

MAX\_MEAN: 9.93      MAX\_MED: 11.8      BMAD: 6.75

COFF: 20.3      HIT-CALL: 0      FITC: 4      ACTP: 0

FLAGS:

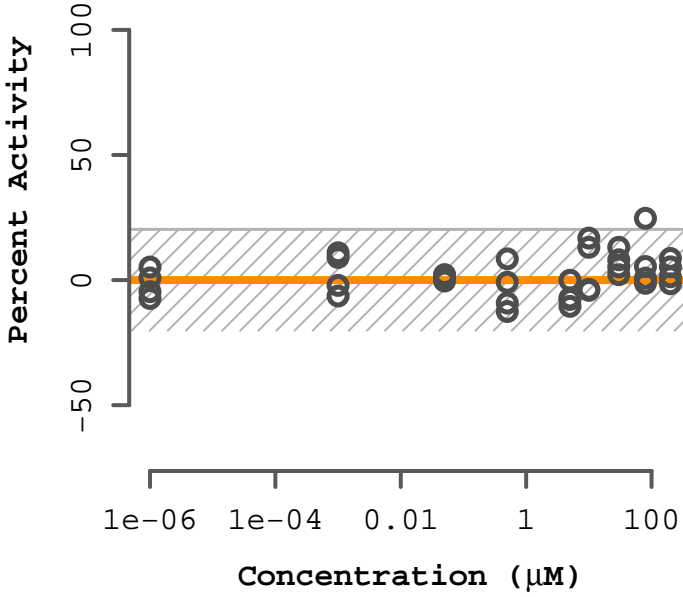

ASSAY: AEID3094 (CCTE\_Deisenroth\_DEVTOX\_RUES2-GLR\_Sox)

NAME: Dimethyl phthalate

CHID: 22455 CASRN: 131-11-3

SPID(S): ES211\_30\_30

M4ID: 42675957

HILL MODEL: Not applicable.

GAIN-LOSS MODEL: Not applicable.

|       |        |      |      |
|-------|--------|------|------|
|       | CNST   | HILL | GNLS |
| AIC:  | 255.23 | NA   | NA   |
| PROB: | 1      | NA   | NA   |
| RMSE: | 8.16   | NA   | NA   |

MAX\_MEAN: 7.41      MAX\_MED: 6.7      BMAD: 6.75

COFF: 20.3      HIT-CALL: 0      FITC: 4      ACTP: 0

FLAGS:

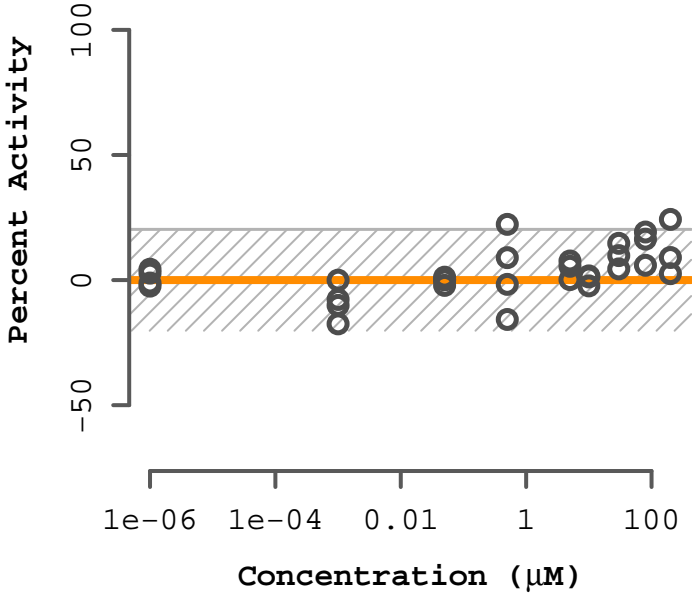

ASSAY: AEID3094 (CCTE\_Deisenroth\_DEVTOX\_RUES2-GLR\_Sox)

NAME: Folic acid

CHID: 22519 CASRN: 59-30-3

SPID(S): ES211\_33\_33

M4ID: 42675914

HILL MODEL: Not applicable.

GAIN-LOSS MODEL: Not applicable.

|       |        |      |      |
|-------|--------|------|------|
|       | CNST   | HILL | GNLS |
| AIC:  | 232.24 | NA   | NA   |
| PROB: | 1      | NA   | NA   |
| RMSE: | 10.02  | NA   | NA   |

MAX\_MEAN: 13.8      MAX\_MED: 16.4      BMAD: 6.75

COFF: 20.3      HIT-CALL: 0      FITC: 4      ACTP: 0

FLAGS:



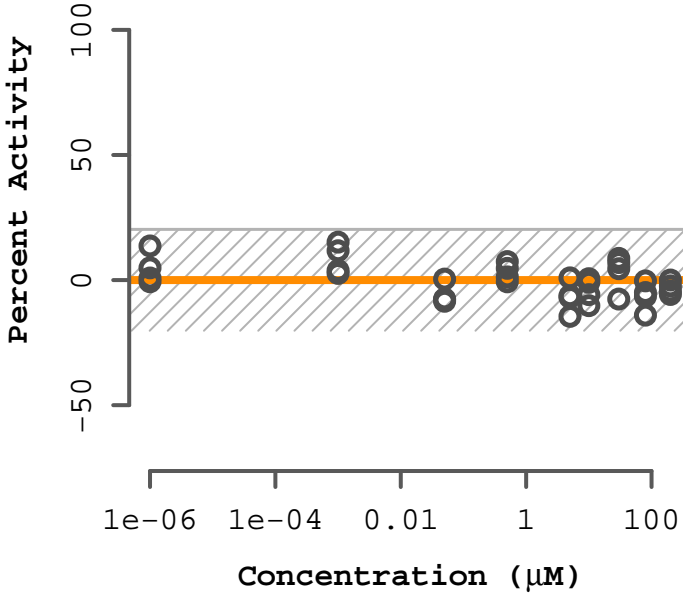

ASSAY: AEID3094 (CCTE\_Deisenroth\_DEVTOX\_RUES2-GLR\_Sox)

NAME: Acyclovir

CHID: 22556 CASRN: 59277-89-3

SPID(S): ES211\_12\_12

M4ID: 42675954

HILL MODEL: Not applicable.

GAIN-LOSS MODEL: Not applicable.

|       |       |      |      |
|-------|-------|------|------|
|       | CNST  | HILL | GNLS |
| AIC:  | 248.4 | NA   | NA   |
| PROB: | 1     | NA   | NA   |
| RMSE: | 7.13  | NA   | NA   |

MAX\_MEAN: 8.36 MAX\_MED: 7.79 BMAD: 6.75

COFF: 20.3 HIT-CALL: 0 FITC: 4 ACTP: 0

FLAGS:

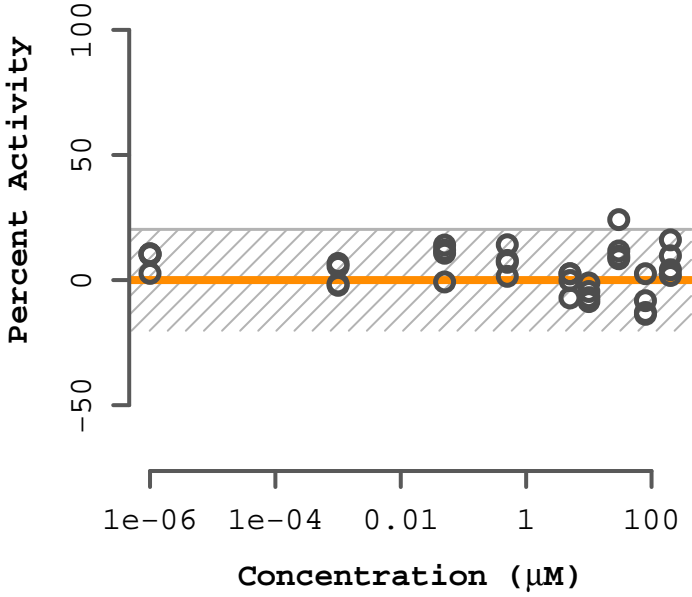

ASSAY: AEID3094 (CCTE\_Deisenroth\_DEVTOX\_RUES2-GLR\_Sox)

NAME: Stavudine

CHID: 23819 CASRN: 3056-17-5

SPID(S): ES211\_58\_58

M4ID: 42675913

HILL MODEL: Not applicable.

GAIN-LOSS MODEL: Not applicable.

|       |        |      |      |
|-------|--------|------|------|
|       | CNST   | HILL | GNLS |
| AIC:  | 267.68 | NA   | NA   |
| PROB: | 1      | NA   | NA   |
| RMSE: | 9.25   | NA   | NA   |

MAX\_MEAN: 13.5 MAX\_MED: 11.4 BMAD: 6.75

COFF: 20.3 HIT-CALL: 0 FITC: 4 ACTP: 0

FLAGS:

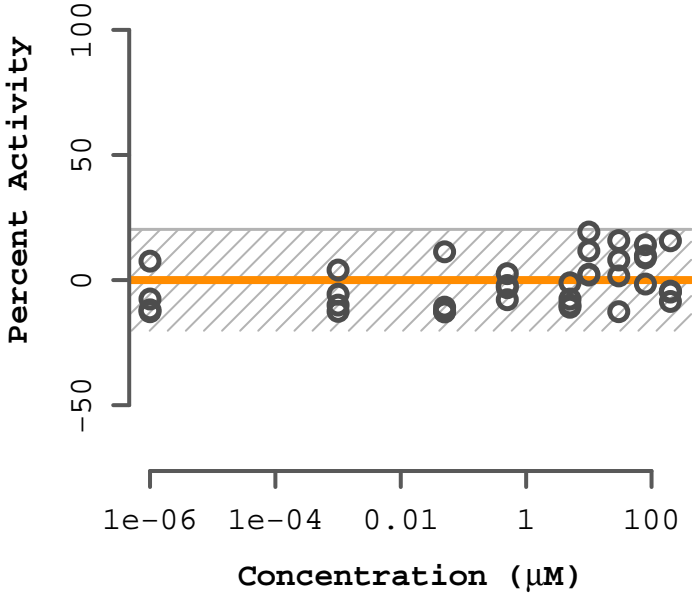

ASSAY: AEID3094 (CCTE\_Deisenroth\_DEVTOX\_RUES2-GLR\_Sox)

NAME: D-Camphor

CHID: 24721 CASRN: 464-49-3

SPID(S): ES211\_27\_27

M4ID: 42675938

HILL MODEL: Not applicable.

GAIN-LOSS MODEL: Not applicable.

|       |        |      |      |
|-------|--------|------|------|
|       | CNST   | HILL | GNLS |
| AIC:  | 273.16 | NA   | NA   |
| PROB: | 1      | NA   | NA   |
| RMSE: | 9.67   | NA   | NA   |

MAX\_MEAN: 8.81 MAX\_MED: 9.33 BMAD: 6.75

COFF: 20.3 HIT-CALL: 0 FITC: 4 ACTP: 0

FLAGS:

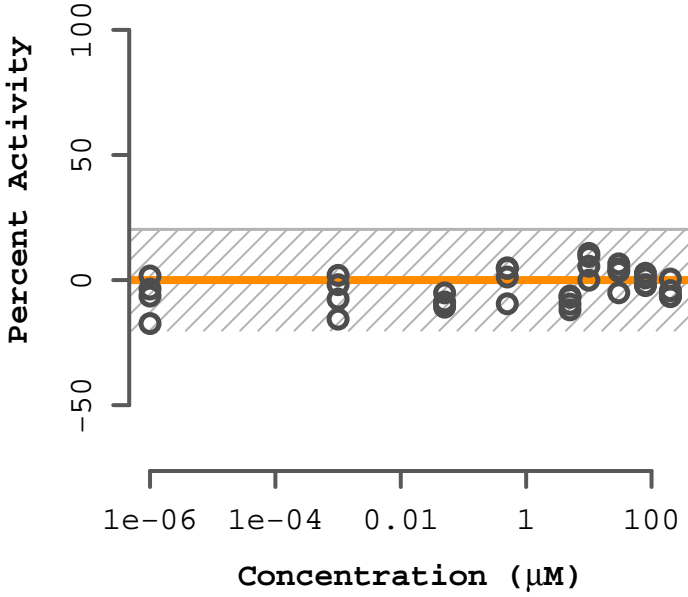

ASSAY: AEID3094 (CCTE\_Deisenroth\_DEVTOX\_RUES2-GLR\_Sox)

NAME: Cyclophosphamide monohydrate

CHID: 24888 CASRN: 6055-19-2

SPID(S): ES211\_24\_24

M4ID: 42675930

HILL MODEL: Not applicable.

GAIN-LOSS MODEL: Not applicable.

|       |        |      |      |
|-------|--------|------|------|
|       | CNST   | HILL | GNLS |
| AIC:  | 249.82 | NA   | NA   |
| PROB: | 1      | NA   | NA   |
| RMSE: | 7.23   | NA   | NA   |

MAX\_MEAN: 6.4      MAX\_MED: 7.49      BMAD: 6.75

COFF: 20.3      HIT-CALL: 0      FITC: 4      ACTP: 0

FLAGS:

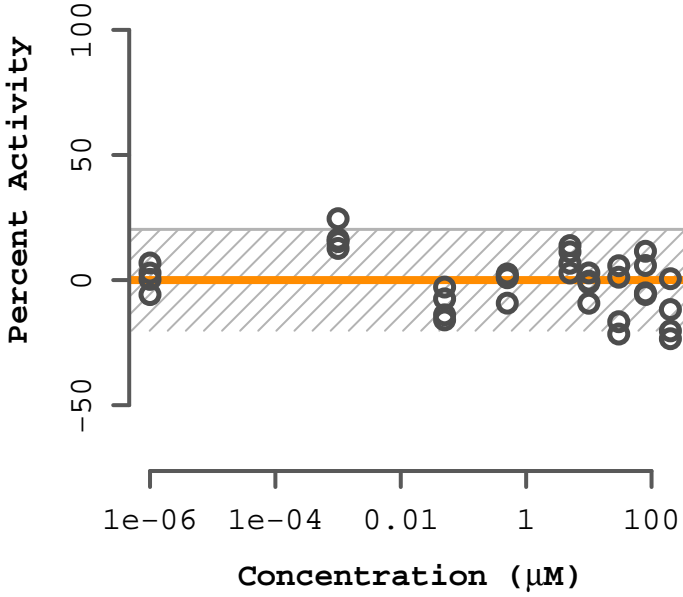

ASSAY: AEID3094 (CCTE\_Deisenroth\_DEVTOX\_RUES2-GLR\_Sox)

NAME: Hydroxyurea

CHID: 25438 CASRN: 127-07-1

SPID(S): ES211\_35\_35

M4ID: 42675909

HILL MODEL: Not applicable.

GAIN-LOSS MODEL: Not applicable.

|       |        |      |      |
|-------|--------|------|------|
|       | CNST   | HILL | GNLS |
| AIC:  | 280.55 | NA   | NA   |
| PROB: | 1      | NA   | NA   |
| RMSE: | 11.22  | NA   | NA   |

MAX\_MEAN: 17.2 MAX\_MED: 15.9 BMAD: 6.75

COFF: 20.3 HIT-CALL: 0 FITC: 4 ACTP: 0

FLAGS:

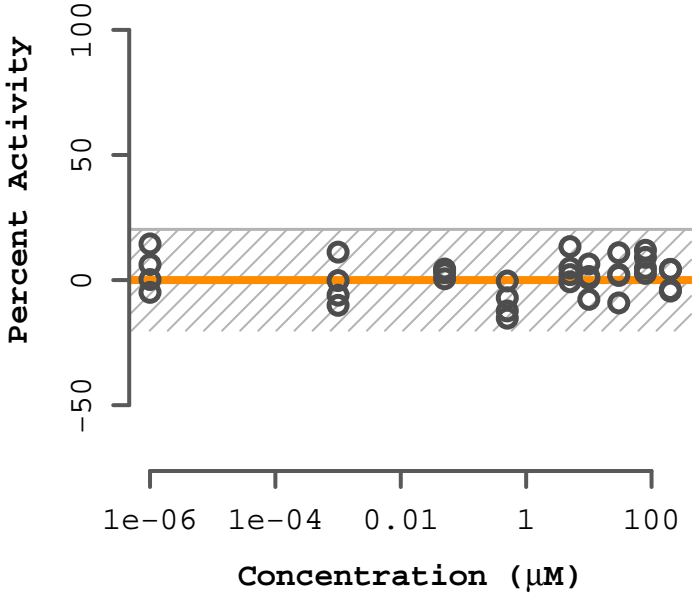

ASSAY: AEID3094 (CCTE\_Deisenroth\_DEVTOX\_RUES2-GLR\_Sox)

NAME: Salicylic acid  
CHID: 26368 CASRN: 69-72-7  
SPID(S): ES211\_55\_55  
M4ID: 42675962

HILL MODEL: Not applicable.

GAIN-LOSS MODEL: Not applicable.

|       |        |      |      |
|-------|--------|------|------|
|       | CNST   | HILL | GNLS |
| AIC:  | 248.94 | NA   | NA   |
| PROB: | 1      | NA   | NA   |
| RMSE: | 7.19   | NA   | NA   |

MAX\_MEAN: 7.1      MAX\_MED: 6.91      BMAD: 6.75

COFF: 20.3      HIT-CALL: 0      FITC: 4      ACTP: 0

FLAGS:

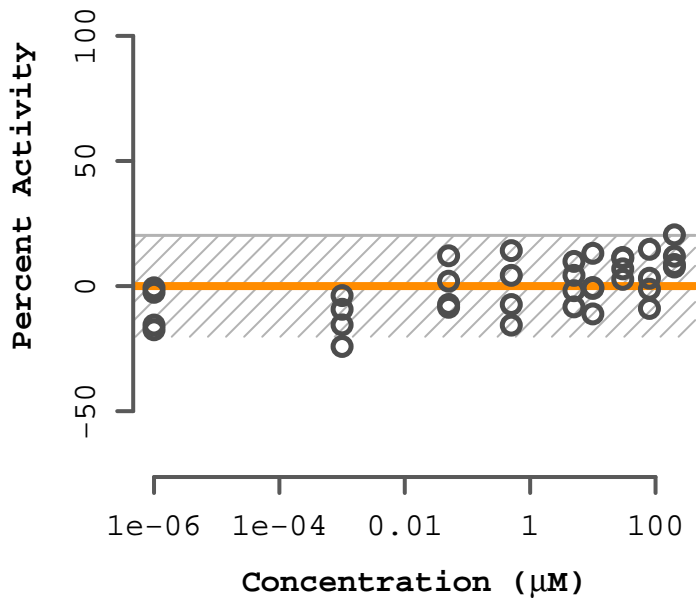

ASSAY: AEID3094 (CCTE\_Deisenroth\_DEVTOX\_RUES2-GLR\_Sox)

NAME: Penicillin G potassium

CHID: 45106 CASRN: 113-98-4

SPID(S): ES211\_49\_49

M4ID: 42675921

HILL MODEL: Not applicable.

GAIN-LOSS MODEL: Not applicable.

|       |        |      |      |
|-------|--------|------|------|
|       | CNST   | HILL | GNLS |
| AIC:  | 278.39 | NA   | NA   |
| PROB: | 1      | NA   | NA   |
| RMSE: | 10.63  | NA   | NA   |

MAX\_MEAN: 12.2 MAX\_MED: 10.3 BMAD: 6.75

COFF: 20.3 HIT-CALL: 0 FITC: 4 ACTP: 0

FLAGS:

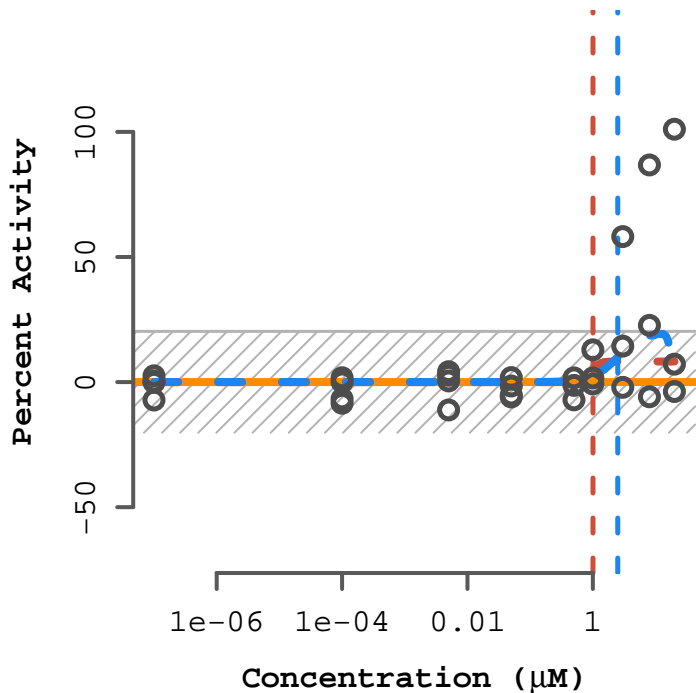

ASSAY: AEID3094 (CCTE\_Deisenroth\_DEVTOX\_RUES2-GLR\_Sox)

NAME: Cyclopamine

CHID: 43709 CASRN: 4449-51-8

SPID(S): ES211\_23\_23

M4ID: 42675968

HILL MODEL (in red):

|      | tp   | ga     | gw   |
|------|------|--------|------|
| val: | 8.21 | 0.0021 | 8    |
| sd:  | 5.08 | 0.147  | 24.6 |

GAIN-LOSS MODEL (in blue):

|      | tp  | ga    | gw   | la   | lw   |
|------|-----|-------|------|------|------|
| val: | 20  | 0.397 | 2.16 | 1.25 | 13.5 |
| sd:  | NaN | NaN   | NaN  | NaN  | NaN  |

|       | CNST  | HILL  | GNLS   |
|-------|-------|-------|--------|
| AIC:  | 261.4 | 263.7 | 266.33 |
| PROB: | 0.71  | 0.23  | 0.06   |
| RMSE: | 26.99 | 24.46 | 23.96  |

MAX\_MEAN: 34.8 MAX\_MED: 22.7 BMAD: 6.75

COFF: 20.3 HIT-CALL: 0 FITC: 9 ACTP: 0.29

FLAGS: 10



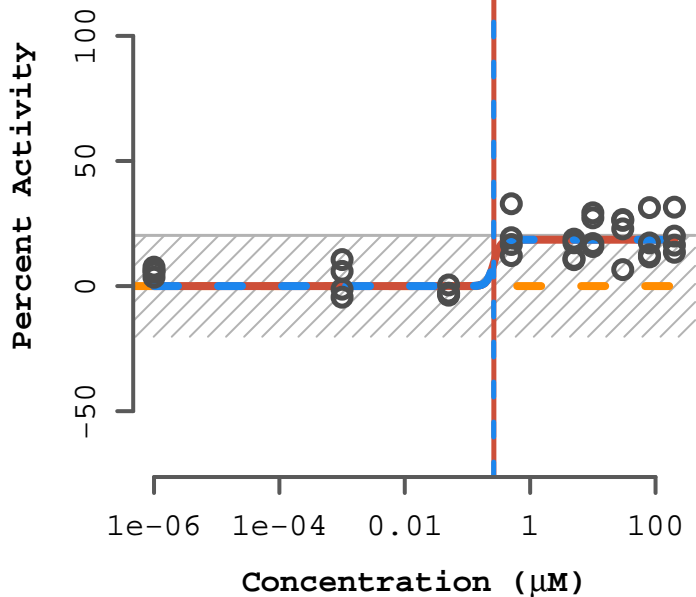

ASSAY: AEID3094 (CCTE\_Deisenroth\_DEVTOX\_RUES2-GLR\_Sox)

NAME: Methotrexate hydrate(1:x)  
 CHID: 1017640 CASRN: 133073-73-1  
 SPID(S): ES211\_45\_45  
 M4ID: 42675948

HILL MODEL (in red):

|      | tp   | ga     | gw   |
|------|------|--------|------|
| val: | 18.5 | -0.579 | 7.99 |
| sd:  | 1.67 | 4.87   | 136  |

GAIN-LOSS MODEL (in blue):

|      | tp   | ga     | gw   | la   | lw    |
|------|------|--------|------|------|-------|
| val: | 18.5 | -0.582 | 7.93 | 2.78 | 17.7  |
| sd:  | 1.67 | 4.81   | 131  | 606  | 20800 |

|       | CNST   | HILL   | GNLS   |
|-------|--------|--------|--------|
| AIC:  | 313.19 | 251.23 | 255.23 |
| PROB: | 0      | 0.88   | 0.12   |
| RMSE: | 17.19  | 6.77   | 6.77   |

MAX\_MEAN: 22.4      MAX\_MED: 24.6      BMAD: 6.75

COFF: 20.3      HIT-CALL: 0      FITC: 20      ACTP: 1

FLAGS: 8; 12

Percent Activity

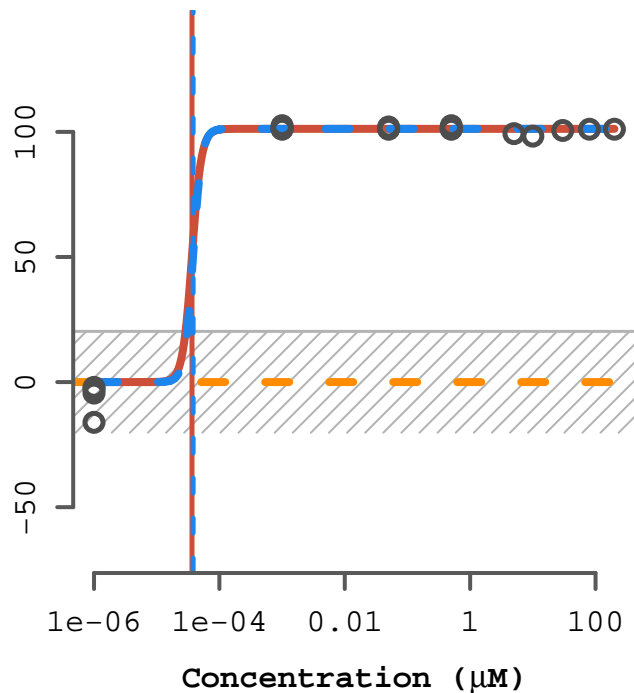

ASSAY: AEID3094 (CCTE\_Deisenroth\_DEVTOX\_RUES2-GLR\_Sox)

NAME: Actinomycin D

CHID: 20031 CASRN: 50-76-0

SPID(S): ES211\_11\_11

M4ID: 42675910

HILL MODEL (in red):

|      | tp    | ga    | gw   |
|------|-------|-------|------|
| val: | 101   | -4.44 | 5.82 |
| sd:  | 0.315 | 90.2  | 354  |

GAIN-LOSS MODEL (in blue):

|      | tp  | ga    | gw   | la   | lw   |
|------|-----|-------|------|------|------|
| val: | 101 | -4.42 | 6.25 | 4.12 | 12.6 |
| sd:  | NA  | NA    | NA   | NA   | NA   |

|       | CNST   | HILL   | GNLS   |
|-------|--------|--------|--------|
| AIC:  | 501.14 | 101.17 | 105.17 |
| PROB: | 0      | 0.88   | 0.12   |
| RMSE: | 91.05  | 3.83   | 3.83   |

MAX\_MEAN: 102 MAX\_MED: 101 BMAD: 6.75

COFF: 20.3 HIT-CALL: 1 FITC: 41 ACTP: 1

FLAGS:

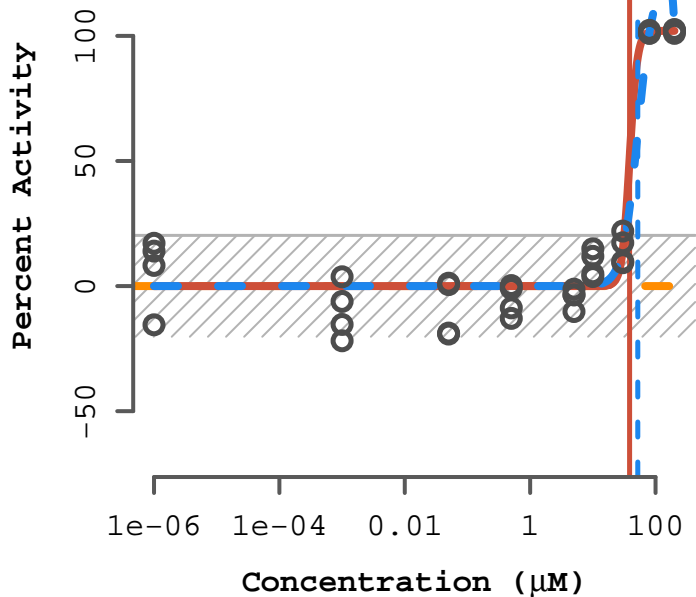

ASSAY: AEID3094 (CCTE\_Deisenroth\_DEVTOX\_RUES2-GLR\_Sox)

NAME: Bisphenol A

CHID: 20182 CASRN: 80-05-7

SPID(S): ES211\_16\_16

M4ID: 42675966

HILL MODEL (in red):

|      | tp   | ga    | gw   |
|------|------|-------|------|
| val: | 102  | 1.59  | 7.16 |
| sd:  | 5.43 | 0.282 | 18.3 |

GAIN-LOSS MODEL (in blue):

|      | tp  | ga   | gw  | la   | lw  |
|------|-----|------|-----|------|-----|
| val: | 123 | 1.72 | 3.6 | 2.34 | 18  |
| sd:  | NaN | NaN  | NaN | NaN  | NaN |

|       | CNST   | HILL   | GNLS   |
|-------|--------|--------|--------|
| AIC:  | 377.01 | 271.59 | 275.29 |
| PROB: | 0      | 0.86   | 0.14   |
| RMSE: | 49.11  | 9.39   | 9.36   |

MAX\_MEAN: 102 MAX\_MED: 102 BMAD: 6.75

COFF: 20.3 HIT-CALL: 1 FITC: 41 ACTP: 1

FLAGS:

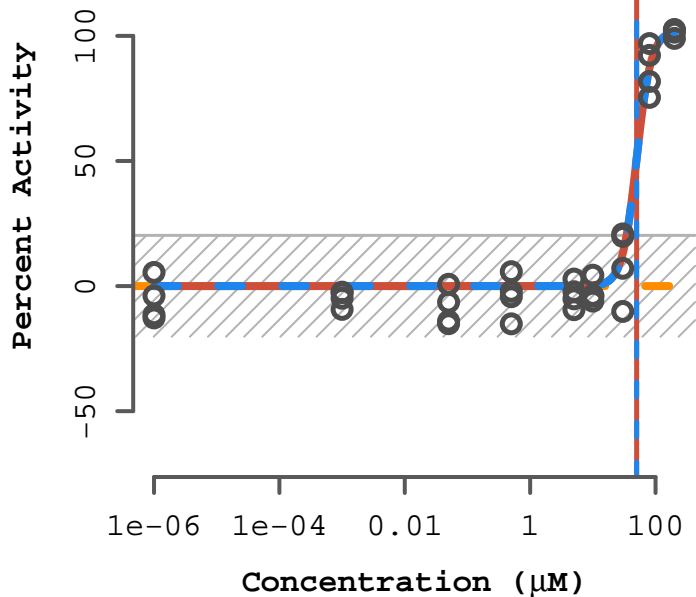

ASSAY: AEID3094 (CCTE\_Deisenroth\_DEVTOX\_RUES2-GLR\_Sox)

NAME: 4-Hydroxybenzoic acid butyl ester

CHID: 20209 CASRN: 94-26-8

SPID(S): ES211\_19\_19

M4ID: 42675935

HILL MODEL (in red):

|      | tp  | ga     | gw    |
|------|-----|--------|-------|
| val: | 102 | 1.7    | 3.75  |
| sd:  | 3.3 | 0.0385 | 0.645 |

GAIN-LOSS MODEL (in blue):

|      | tp  | ga     | gw    | la   | lw    |
|------|-----|--------|-------|------|-------|
| val: | 102 | 1.7    | 3.75  | 3.13 | 9.12  |
| sd:  | 3.3 | 0.0385 | 0.645 | 1270 | 14000 |

|       | CNST   | HILL   | GNLS   |
|-------|--------|--------|--------|
| AIC:  | 369.23 | 262.41 | 266.41 |
| PROB: | 0      | 0.88   | 0.12   |
| RMSE: | 45.27  | 8.17   | 8.17   |

MAX\_MEAN: 101 MAX\_MED: 102 BMAD: 6.75

COFF: 20.3 HIT-CALL: 1 FITC: 41 ACTP: 1

FLAGS:

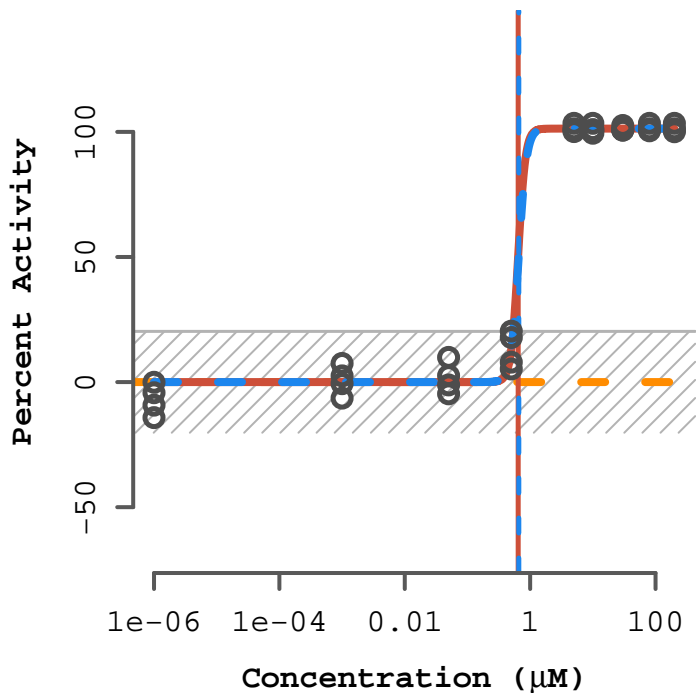

ASSAY: AEID3094 (CCTE\_Deisenroth\_DEVTOX\_RUES2-GLR\_Sox)

NAME: Diethylstilbestrol  
 CHID: 20465 CASRN: 56-53-1  
 SPID(S): ES211\_29\_29  
 M4ID: 42675961

HILL MODEL (in red):

|      | tp    | ga     | gw   |
|------|-------|--------|------|
| val: | 101   | -0.191 | 7.51 |
| sd:  | 0.637 | 2.5    | 170  |

GAIN-LOSS MODEL (in blue):

|      | tp    | ga     | gw   | la     | lw     |
|------|-------|--------|------|--------|--------|
| val: | 101   | -0.181 | 6.91 | 4.3    | 6.43   |
| sd:  | 0.637 | 3.17   | 182  | 173000 | 545000 |

|       | CNST   | HILL   | GNLS   |
|-------|--------|--------|--------|
| AIC:  | 440.17 | 213.01 | 217.01 |
| PROB: | 0      | 0.88   | 0.12   |
| RMSE: | 75.79  | 4.49   | 4.49   |

MAX\_MEAN: 101      MAX\_MED: 101      BMAD: 6.75

COFF: 20.3      HIT-CALL: 1      FITC: 41      ACTP: 1

FLAGS:

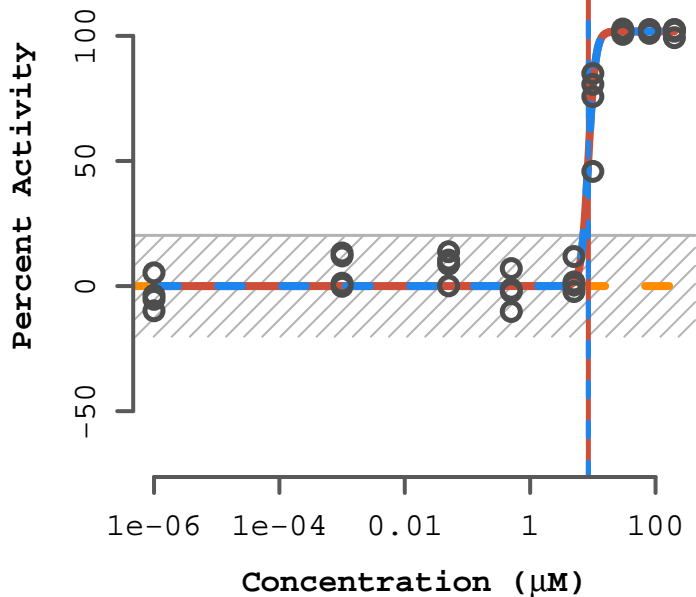

ASSAY: AEID3094 (CCTE\_Deisenroth\_DEVTOX\_RUES2-GLR\_Sox)

NAME: 5-Fluorouracil

CHID: 20634 CASRN: 51-21-8

SPID(S): ES211\_5\_5

M4ID: 42675906

HILL MODEL (in red):

|      |      |        |      |
|------|------|--------|------|
|      | tp   | ga     | gw   |
| val: | 102  | 0.929  | 7.65 |
| sd:  | 1.24 | 0.0226 | 2.29 |

GAIN-LOSS MODEL (in blue):

|      |     |       |      |     |      |
|------|-----|-------|------|-----|------|
|      | tp  | ga    | gw   | la  | lw   |
| val: | 102 | 0.929 | 7.65 | 3.5 | 14.2 |
| sd:  | NA  | NA    | NA   | NA  | NA   |

|       |        |        |        |
|-------|--------|--------|--------|
|       | CNST   | HILL   | GNLS   |
| AIC:  | 405.86 | 247.65 | 251.65 |
| PROB: | 0      | 0.88   | 0.12   |
| RMSE: | 63.9   | 8.02   | 8.02   |

MAX\_MEAN: 102 MAX\_MED: 102 BMAD: 6.75

COFF: 20.3 HIT-CALL: 1 FITC: 41 ACTP: 1

FLAGS:

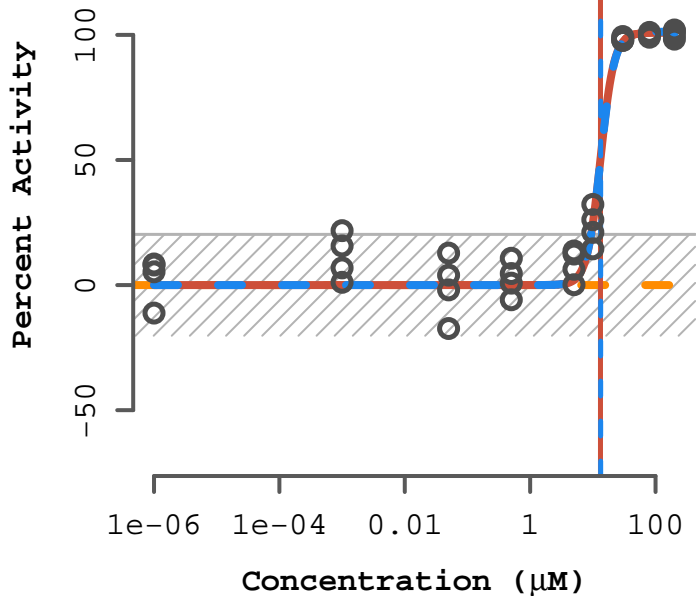

ASSAY: AEID3094 (CCTE\_Deisenroth\_DEVTOX\_RUES2-GLR\_Sox:

NAME: 1-(p-Chlorobenzoyl)-5-methoxy-2-methyl-Indole-

CHID: 20740 CASRN: 53-86-1

SPID(S): ES211\_38\_38

M4ID: 42675911

HILL MODEL (in red):

|      | tp   | ga     | gw    |
|------|------|--------|-------|
| val: | 101  | 1.12   | 4.01  |
| sd:  | 1.85 | 0.0276 | 0.795 |

GAIN-LOSS MODEL (in blue):

|      | tp  | ga   | gw   | la   | lw  |
|------|-----|------|------|------|-----|
| val: | 101 | 1.12 | 3.93 | 2.42 | 18  |
| sd:  | NaN | NaN  | NaN  | NaN  | NaN |

|       | CNST   | HILL   | GNLS   |
|-------|--------|--------|--------|
| AIC:  | 397.37 | 256.47 | 260.41 |
| PROB: | 0      | 0.88   | 0.12   |
| RMSE: | 58.6   | 7.77   | 7.77   |

MAX\_MEAN: 100 MAX\_MED: 101 BMAD: 6.75

COFF: 20.3 HIT-CALL: 1 FITC: 41 ACTP: 1

FLAGS:

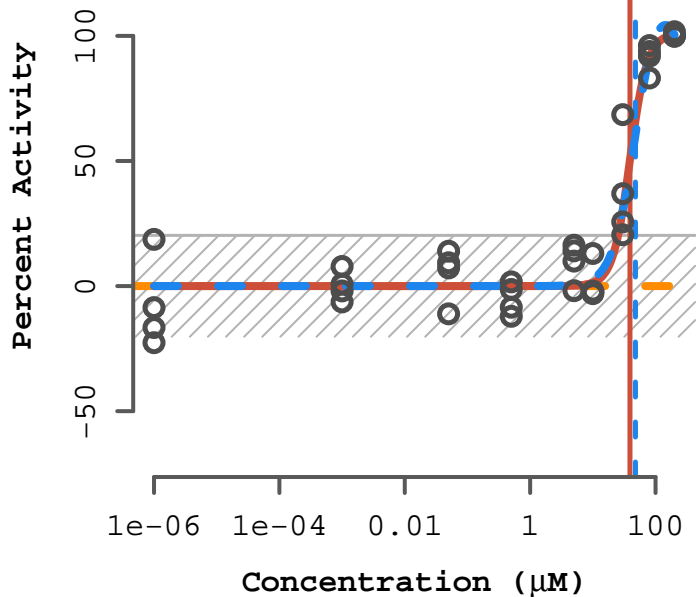

ASSAY: AEID3094 (CCTE\_Deisenroth\_DEVTOX\_RUES2-GLR\_Sox)

NAME: Busulfan

CHID: 20910 CASRN: 55-98-1

SPID(S): ES211\_18\_18

M4ID: 42675950

HILL MODEL (in red):

|      | tp   | ga     | gw    |
|------|------|--------|-------|
| val: | 101  | 1.59   | 3.17  |
| sd:  | 4.24 | 0.0404 | 0.728 |

GAIN-LOSS MODEL (in blue):

|      | tp  | ga   | gw   | la   | lw   |
|------|-----|------|------|------|------|
| val: | 122 | 1.68 | 2.36 | 2.67 | 2.09 |
| sd:  | NaN | NaN  | NaN  | NaN  | NaN  |

|       | CNST   | HILL   | GNLS   |
|-------|--------|--------|--------|
| AIC:  | 378.91 | 280.66 | 284.62 |
| PROB: | 0      | 0.88   | 0.12   |
| RMSE: | 48.2   | 11.11  | 11.1   |

MAX\_MEAN: 100 MAX\_MED: 100 BMAD: 6.75

COFF: 20.3 HIT-CALL: 1 FITC: 41 ACTP: 1

FLAGS:



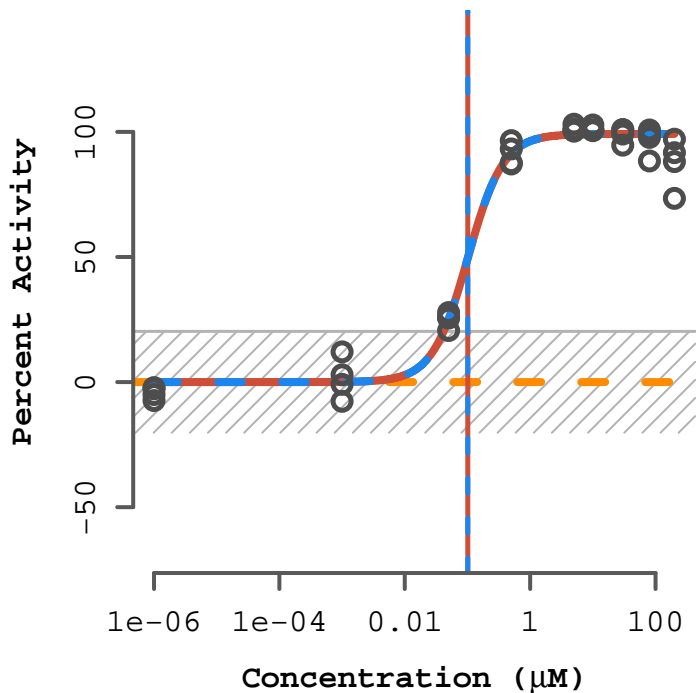

ASSAY: AEID3094 (CCTE\_Deisenroth\_DEVTOX\_RUES2-GLR\_Sox)

NAME: all-trans-Retinoic acid

CHID: 21239 CASRN: 302-79-4

SPID(S): ES211\_13\_13

M4ID: 42675942

HILL MODEL (in red):

|      |      |        |       |
|------|------|--------|-------|
|      | tp   | ga     | gw    |
| val: | 99.2 | -0.995 | 1.53  |
| sd:  | 1.03 | 0.0384 | 0.158 |

GAIN-LOSS MODEL (in blue):

|      |      |        |      |     |      |
|------|------|--------|------|-----|------|
|      | tp   | ga     | gw   | la  | lw   |
| val: | 99.2 | -0.995 | 1.53 | 3.8 | 13.3 |
| sd:  | NA   | NA     | NA   | NA  | NA   |

|       |        |        |        |
|-------|--------|--------|--------|
|       | CNST   | HILL   | GNLS   |
| AIC:  | 425.46 | 231.72 | 235.72 |
| PROB: | 0      | 0.88   | 0.12   |
| RMSE: | 79.17  | 6.31   | 6.31   |

MAX\_MEAN: 101 MAX\_MED: 101 BMAD: 6.75

COFF: 20.3 HIT-CALL: 1 FITC: 41 ACTP: 1

FLAGS:

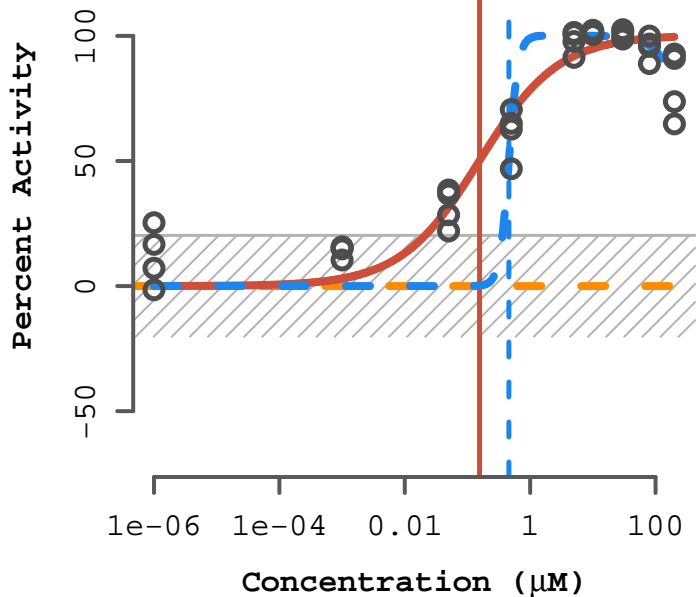

ASSAY: AEID3094 (CCTE\_Deisenroth\_DEVTOX\_RUES2-GLR\_Sox)

NAME: 13-cis Retinoic acid

CHID: 23177 CASRN: 4759-48-2

SPID(S): ES211\_2\_2

M4ID: 42675963

HILL MODEL (in red):

|      | tp  | ga     | gw    |
|------|-----|--------|-------|
| val: | 100 | -0.807 | 0.688 |
| sd:  | 3.1 | 0.111  | 0.123 |

GAIN-LOSS MODEL (in blue):

|      | tp  | ga     | gw   | la   | lw   |
|------|-----|--------|------|------|------|
| val: | 100 | -0.339 | 5.79 | 2.64 | 1.85 |
| sd:  | NaN | NaN    | NaN  | NaN  | NaN  |

|       | CNST   | HILL   | GNLS   |
|-------|--------|--------|--------|
| AIC:  | 421.64 | 283.01 | 300.17 |
| PROB: | 0      | 1      | 0      |
| RMSE: | 75.29  | 11.47  | 13.9   |

MAX\_MEAN: 101 MAX\_MED: 101 BMAD: 6.75

COFF: 20.3 HIT-CALL: 1 FITC: 41 ACTP: 1

FLAGS:

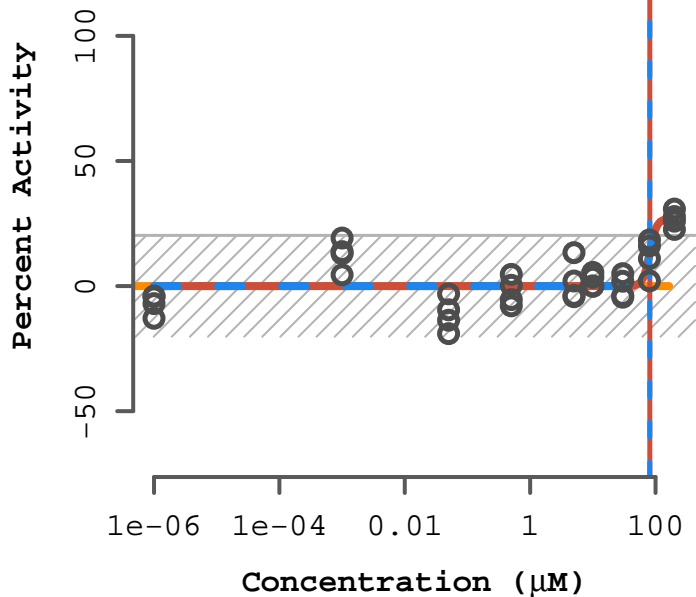

ASSAY: AEID3094 (CCTE\_Deisenroth\_DEVTOX\_RUES2-GLR\_Sox)

NAME: Warfarin

CHID: 23742 CASRN: 81-81-2

SPID(S): ES211\_65\_65

M4ID: 42675958

HILL MODEL (in red):

|      | tp   | ga     | gw   |
|------|------|--------|------|
| val: | 26.8 | 1.91   | 8    |
| sd:  | 3.14 | 0.0471 | 46.7 |

GAIN-LOSS MODEL (in blue):

|      | tp   | ga   | gw | la  | lw   |
|------|------|------|----|-----|------|
| val: | 26.8 | 1.91 | 8  | 3.9 | 7.79 |
| sd:  | NA   | NA   | NA | NA  | NA   |

|       | CNST   | HILL   | GNLS   |
|-------|--------|--------|--------|
| AIC:  | 286.97 | 259.79 | 263.79 |
| PROB: | 0      | 0.88   | 0.12   |
| RMSE: | 12.59  | 7.94   | 7.94   |

MAX\_MEAN: 26.8      MAX\_MED: 26.9      BMAD: 6.75

COFF: 20.3      HIT-CALL: 1      FITC: 41      ACTP: 1

FLAGS: 7; 17

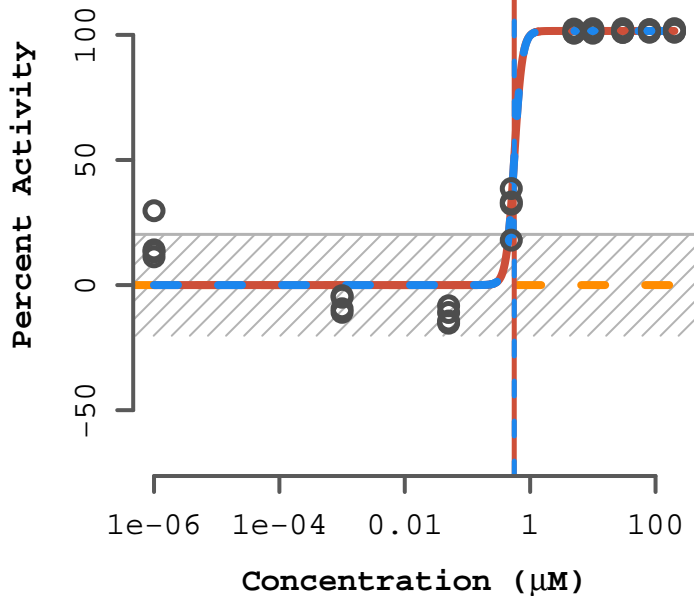

ASSAY: AEID3094 (CCTE\_Deisenroth\_DEVTOX\_RUES2-GLR\_Sox)

NAME: Cytarabine hydrochloride

CHID: 24891 CASRN: 69-74-9

SPID(S): ES211\_25\_25

M4ID: 42675965

HILL MODEL (in red):

|      | tp   | ga     | gw   |
|------|------|--------|------|
| val: | 102  | -0.254 | 6.89 |
| sd:  | 1.05 | 0.474  | 69.1 |

GAIN-LOSS MODEL (in blue):

|      | tp   | ga     | gw   | la   | lw    |
|------|------|--------|------|------|-------|
| val: | 102  | -0.253 | 6.83 | 3.09 | 10.2  |
| sd:  | 1.05 | 0.653  | 93.3 | 794  | 10300 |

|       | CNST  | HILL   | GNLS   |
|-------|-------|--------|--------|
| AIC:  | 512.8 | 255.28 | 259.28 |
| PROB: | 0     | 0.88   | 0.12   |
| RMSE: | 76.84 | 8.36   | 8.36   |

MAX\_MEAN: 102 MAX\_MED: 102 BMAD: 6.75

COFF: 20.3 HIT-CALL: 1 FITC: 41 ACTP: 1

FLAGS:

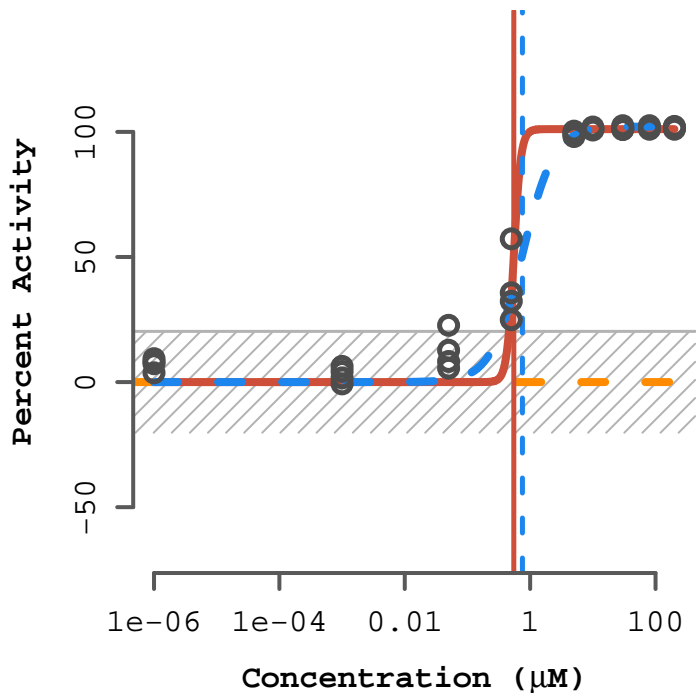

ASSAY: AEID3094 (CCTE\_Deisenroth\_DEVTOX\_RUES2-GLR\_Sox)

NAME: 5-Bromo-2'-deoxyuridine

CHID: 33105 CASRN: 59-14-3

SPID(S): ES211\_4\_4

M4ID: 42675922

HILL MODEL (in red):

|      | tp    | ga     | gw   |
|------|-------|--------|------|
| val: | 101   | -0.261 | 7.77 |
| sd:  | 0.758 | 0.372  | 71.6 |

GAIN-LOSS MODEL (in blue):

|      | tp   | ga     | gw    | la    | lw   |
|------|------|--------|-------|-------|------|
| val: | 102  | -0.123 | 1.74  | 2.48  | 12.5 |
| sd:  | 1.23 | 0.0351 | 0.272 | 0.151 | 8.9  |

|       | CNST   | HILL   | GNLS  |
|-------|--------|--------|-------|
| AIC:  | 448.66 | 234.53 | 235.1 |
| PROB: | 0      | 0.57   | 0.43  |
| RMSE: | 76.67  | 6.96   | 6.71  |

MAX\_MEAN: 102 MAX\_MED: 102 BMAD: 6.75

COFF: 20.3 HIT-CALL: 1 FITC: 41 ACTP: 1

FLAGS:

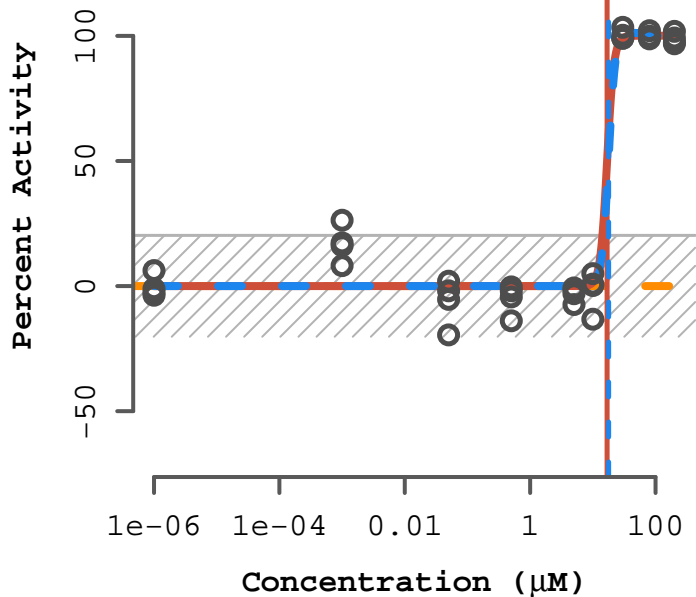

ASSAY: AEID3094 (CCTE\_Deisenroth\_DEVTOX\_RUES2-GLR\_Sox)

NAME: Amiodarone hydrochloride

CHID: 37185 CASRN: 19774-82-4

SPID(S): ES211\_14\_14

M4ID: 42675960

HILL MODEL (in red):

|      | tp  | ga     | gw  |
|------|-----|--------|-----|
| val: | 100 | 1.23   | 8   |
| sd:  | 1.4 | 0.0567 | 1.9 |

GAIN-LOSS MODEL (in blue):

|      | tp  | ga     | gw   | la   | lw    |
|------|-----|--------|------|------|-------|
| val: | 103 | 1.25   | 8    | 4.3  | 0.677 |
| sd:  | 13  | 0.0905 | 2.88 | 5.53 | 2.47  |

|       | CNST   | HILL   | GNLS   |
|-------|--------|--------|--------|
| AIC:  | 396.09 | 250.63 | 253.87 |
| PROB: | 0      | 0.84   | 0.16   |
| RMSE: | 58.16  | 8.09   | 8.05   |

MAX\_MEAN: 100 MAX\_MED: 99.7 BMAD: 6.75

COFF: 20.3 HIT-CALL: 1 FITC: 41 ACTP: 1

FLAGS:

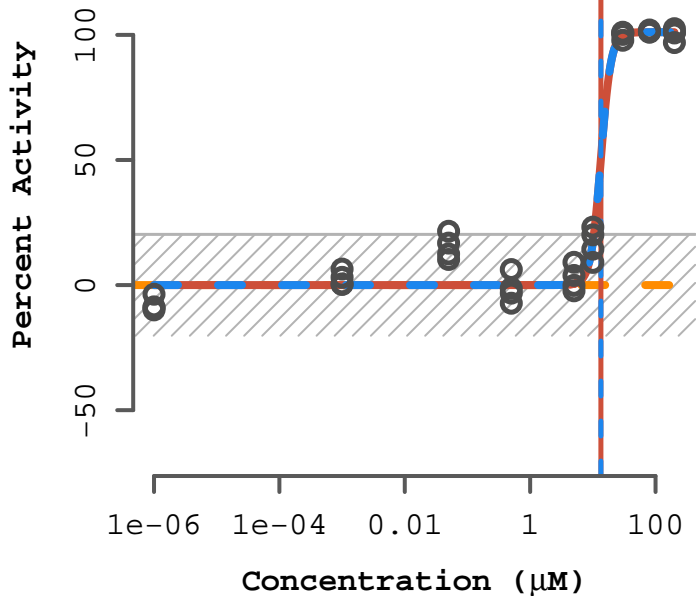

ASSAY: AEID3094 (CCTE\_Deisenroth\_DEVTOX\_RUES2-GLR\_Sox)

NAME: Imatinib mesylate

CHID: 40502 CASRN: 220127-57-1

SPID(S): ES211\_37\_37

M4ID: 42675929

HILL MODEL (in red):

|      | tp   | ga     | gw   |
|------|------|--------|------|
| val: | 101  | 1.13   | 5.37 |
| sd:  | 1.56 | 0.0447 | 1.78 |

GAIN-LOSS MODEL (in blue):

|      | tp  | ga   | gw   | la   | lw   |
|------|-----|------|------|------|------|
| val: | 101 | 1.13 | 5.37 | 4.29 | 12.8 |
| sd:  | NA  | NA   | NA   | NA   | NA   |

|       | CNST   | HILL   | GNLS   |
|-------|--------|--------|--------|
| AIC:  | 396.96 | 244.24 | 248.24 |
| PROB: | 0      | 0.88   | 0.12   |
| RMSE: | 58.73  | 6.8    | 6.8    |

MAX\_MEAN: 101 MAX\_MED: 101 BMAD: 6.75

COFF: 20.3 HIT-CALL: 1 FITC: 41 ACTP: 1

FLAGS:

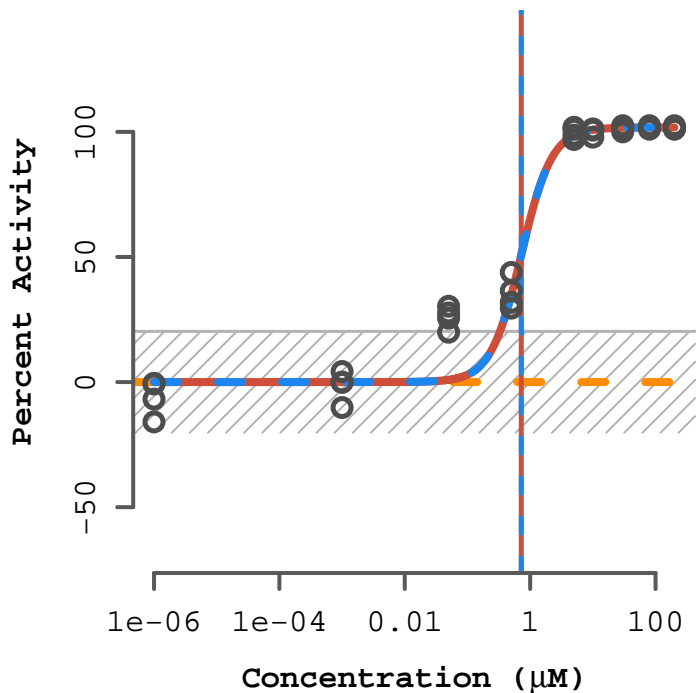

ASSAY: AEID3094 (CCTE\_Deisenroth\_DEVTOX\_RUES2-GLR\_Sox)

NAME: Dasatinib

CHID: 40979 CASRN: 302962-49-8

SPID(S): ES211\_26\_26

M4ID: 42675949

HILL MODEL (in red):

|      |      |        |       |
|------|------|--------|-------|
|      | tp   | ga     | gw    |
| val: | 102  | -0.142 | 1.78  |
| sd:  | 1.04 | 0.0377 | 0.343 |

GAIN-LOSS MODEL (in blue):

|      |     |        |      |     |      |
|------|-----|--------|------|-----|------|
|      | tp  | ga     | gw   | la  | lw   |
| val: | 102 | -0.142 | 1.78 | 4.2 | 11.2 |
| sd:  | NA  | NA     | NA   | NA  | NA   |

|       |        |        |        |
|-------|--------|--------|--------|
|       | CNST   | HILL   | GNLS   |
| AIC:  | 432.03 | 251.71 | 255.71 |
| PROB: | 0      | 0.88   | 0.12   |
| RMSE: | 76.76  | 9.33   | 9.33   |

MAX\_MEAN: 102 MAX\_MED: 102 BMAD: 6.75

COFF: 20.3 HIT-CALL: 1 FITC: 41 ACTP: 1

FLAGS:



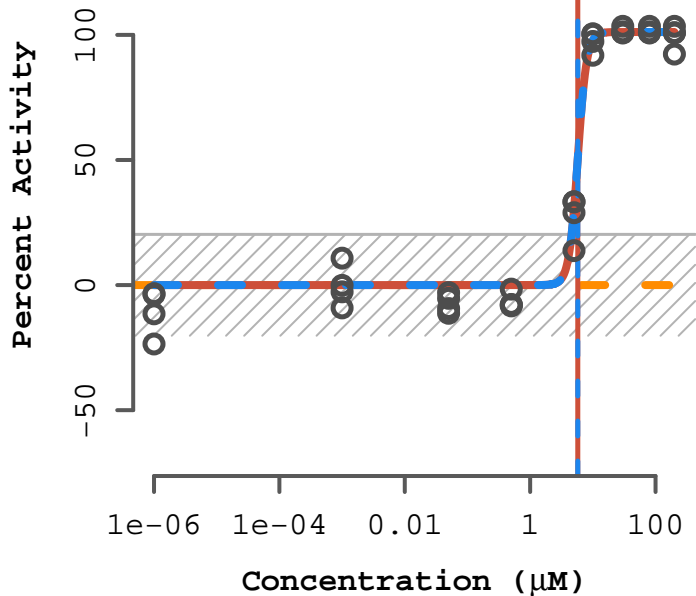

ASSAY: AEID3094 (CCTE\_Deisenroth\_DEVTOX\_RUES2-GLR\_Sox)

NAME: Gefitinib

CHID: 41034 CASRN: 184475-35-2

SPID(S): ES211\_34\_34

M4ID: 42675943

HILL MODEL (in red):

|      | tp   | ga     | gw   |
|------|------|--------|------|
| val: | 101  | 0.76   | 6.11 |
| sd:  | 1.36 | 0.0154 | 1.29 |

GAIN-LOSS MODEL (in blue):

|      | tp  | ga   | gw   | la   | lw   |
|------|-----|------|------|------|------|
| val: | 101 | 0.76 | 6.11 | 3.59 | 17.2 |
| sd:  | NA  | NA   | NA   | NA   | NA   |

|       | CNST  | HILL   | GNLS   |
|-------|-------|--------|--------|
| AIC:  | 411.1 | 246.31 | 250.31 |
| PROB: | 0     | 0.88   | 0.12   |
| RMSE: | 67.66 | 7.06   | 7.06   |

MAX\_MEAN: 102 MAX\_MED: 101 BMAD: 6.75

COFF: 20.3 HIT-CALL: 1 FITC: 41 ACTP: 1

FLAGS:

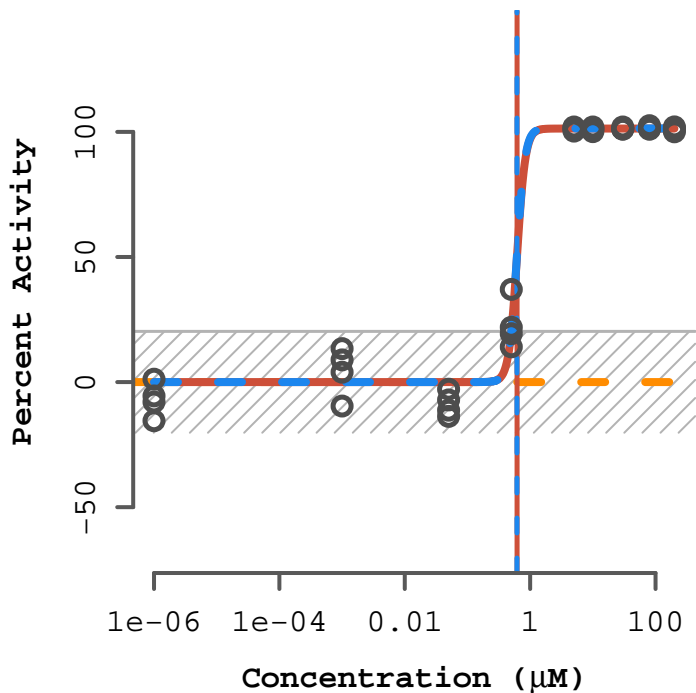

ASSAY: AEID3094 (CCTE\_Deisenroth\_DEVTOX\_RUES2-GLR\_Sox)

NAME: Sorafenib

CHID: 41128 CASRN: 284461-73-0

SPID(S): ES211\_57\_57

M4ID: 42675940

HILL MODEL (in red):

|      | tp    | ga     | gw   |
|------|-------|--------|------|
| val: | 101   | -0.209 | 6.54 |
| sd:  | 0.783 | 2.6    | 184  |

GAIN-LOSS MODEL (in blue):

|      | tp    | ga    | gw   | la    | lw   |
|------|-------|-------|------|-------|------|
| val: | 101   | -0.21 | 6.68 | 2.52  | 11.5 |
| sd:  | 0.883 | 1.16  | 85.7 | 0.331 | 18.5 |

|       | CNST   | HILL   | GNLS   |
|-------|--------|--------|--------|
| AIC:  | 501.52 | 235.35 | 239.33 |
| PROB: | 0      | 0.88   | 0.12   |
| RMSE: | 76.16  | 6.25   | 6.25   |

MAX\_MEAN: 102      MAX\_MED: 102      BMAD: 6.75

COFF: 20.3      HIT-CALL: 1      FITC: 41      ACTP: 1

FLAGS:

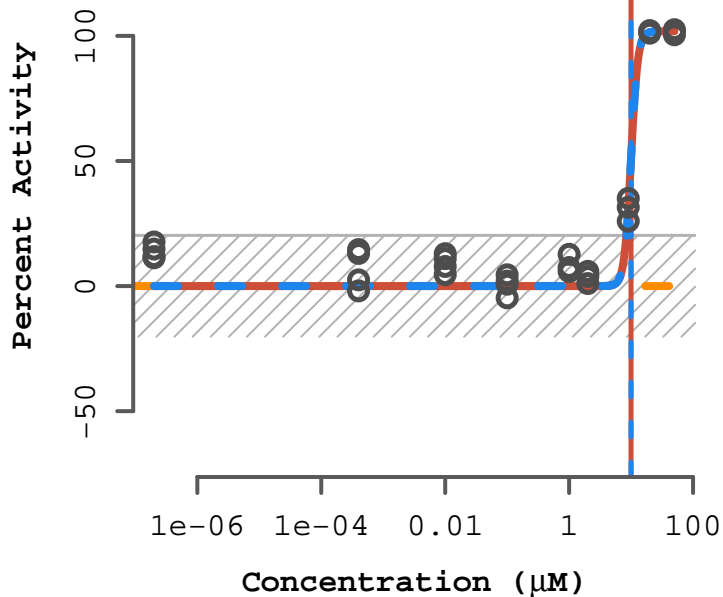

ASSAY: AEID3094 (CCTE\_Deisenroth\_DEVTOX\_RUES2-GLR\_Sox)

NAME: Ritanserin

CHID: 42594 CASRN: 87051-43-2

SPID(S): ES211\_53\_53

M4ID: 42675947

HILL MODEL (in red):

|      | tp   | ga     | gw   |
|------|------|--------|------|
| val: | 102  | 0.999  | 8    |
| sd:  | 2.62 | 0.0414 | 7.14 |

GAIN-LOSS MODEL (in blue):

|      | tp  | ga    | gw | la   | lw |
|------|-----|-------|----|------|----|
| val: | 102 | 0.999 | 8  | 3.61 | 16 |
| sd:  | NA  | NA    | NA | NA   | NA |

|       | CNST   | HILL   | GNLS   |
|-------|--------|--------|--------|
| AIC:  | 319.97 | 225.87 | 229.87 |
| PROB: | 0      | 0.88   | 0.12   |
| RMSE: | 46.41  | 7.94   | 7.94   |

MAX\_MEAN: 102 MAX\_MED: 102 BMAD: 6.75

COFF: 20.3 HIT-CALL: 1 FITC: 41 ACTP: 1

FLAGS:

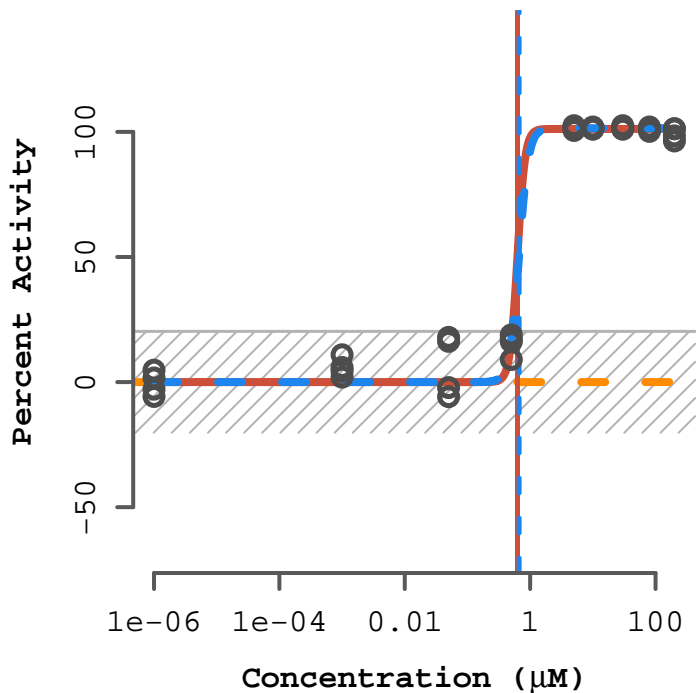

ASSAY: AEID3094 (CCTE\_Deisenroth\_DEVTOX\_RUES2-GLR\_Sox)

NAME: Sunitinib malate

CHID: 46492 CASRN: 341031-54-7

SPID(S): ES211\_60\_60

M4ID: 42675918

HILL MODEL (in red):

|      | tp    | ga     | gw  |
|------|-------|--------|-----|
| val: | 101   | -0.202 | 7.2 |
| sd:  | 0.589 | 0.922  | 67  |

GAIN-LOSS MODEL (in blue):

|      | tp  | ga     | gw   | la  | lw   |
|------|-----|--------|------|-----|------|
| val: | 101 | -0.176 | 5.72 | 2.4 | 17.9 |
| sd:  | NaN | NaN    | NaN  | NaN | NaN  |

|       | CNST   | HILL   | GNLS   |
|-------|--------|--------|--------|
| AIC:  | 446.04 | 213.91 | 216.28 |
| PROB: | 0      | 0.77   | 0.23   |
| RMSE: | 75.66  | 5.18   | 5.14   |

MAX\_MEAN: 102 MAX\_MED: 102 BMAD: 6.75

COFF: 20.3 HIT-CALL: 1 FITC: 41 ACTP: 1

FLAGS:

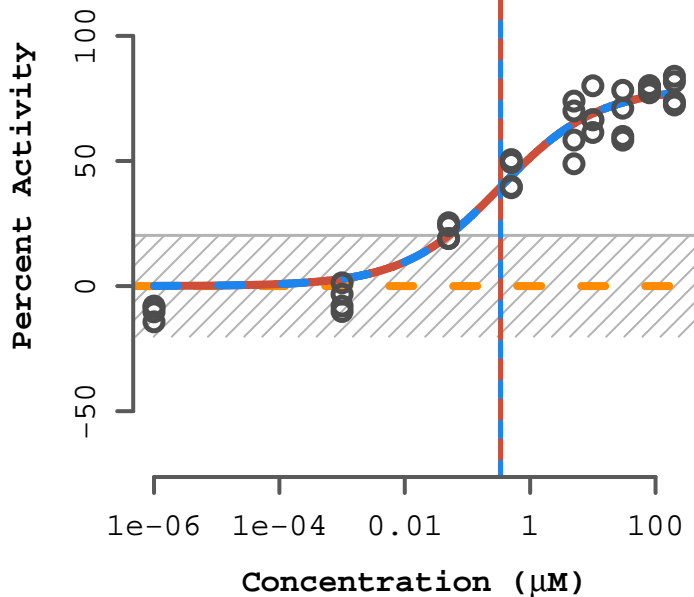

ASSAY: AEID3094 (CCTE\_Deisenroth\_DEVTOX\_RUES2-GLR\_Sox)

NAME: Lenalidomide

CHID: 46664 CASRN: 191732-72-6

SPID(S): ES211\_41\_41

M4ID: 42675941

HILL MODEL (in red):

|      | tp   | ga     | gw     |
|------|------|--------|--------|
| val: | 79.2 | -0.472 | 0.561  |
| sd:  | 3.72 | 0.158  | 0.0897 |

GAIN-LOSS MODEL (in blue):

|      | tp   | ga     | gw    | la  | lw   |
|------|------|--------|-------|-----|------|
| val: | 79.2 | -0.472 | 0.561 | 4.3 | 11.6 |
| sd:  | NA   | NA     | NA    | NA  | NA   |

|       | CNST   | HILL   | GNLS   |
|-------|--------|--------|--------|
| AIC:  | 400.18 | 260.37 | 264.37 |
| PROB: | 0      | 0.88   | 0.12   |
| RMSE: | 56.09  | 7.67   | 7.67   |

MAX\_MEAN: 78.8      MAX\_MED: 78.9      BMAD: 6.75

COFF: 20.3      HIT-CALL: 1      FITC: 41      ACTP: 1

FLAGS:

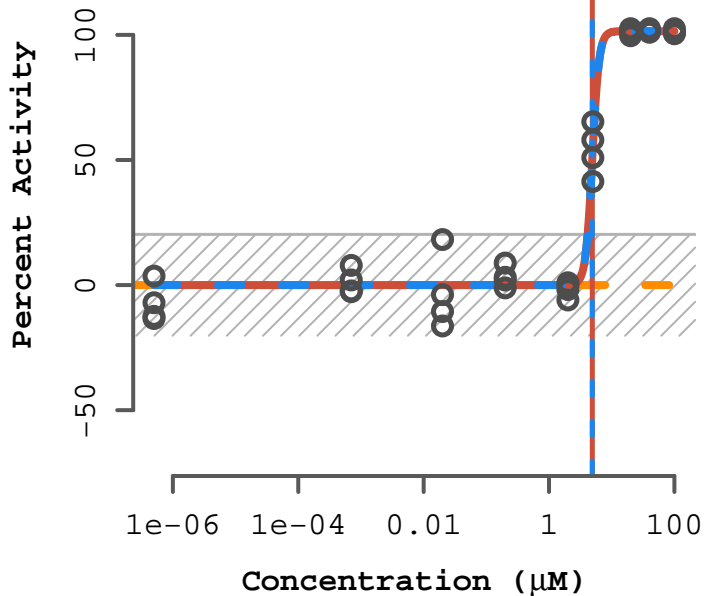

ASSAY: AEID3094 (CCTE\_Deisenroth\_DEVTOX\_RUES2-GLR\_Sox)

NAME: Vandetanib

CHID: 46681 CASRN: 443913-73-3

SPID(S): ES211\_64\_64

M4ID: 42675964

HILL MODEL (in red):

|      | tp   | ga     | gw   |
|------|------|--------|------|
| val: | 101  | 0.691  | 8    |
| sd:  | 1.22 | 0.0111 | 7.01 |

GAIN-LOSS MODEL (in blue):

|      | tp  | ga    | gw | la | lw |
|------|-----|-------|----|----|----|
| val: | 101 | 0.691 | 8  | 4  | 18 |
| sd:  | NA  | NA    | NA | NA | NA |

|       | CNST   | HILL   | GNLS   |
|-------|--------|--------|--------|
| AIC:  | 402.56 | 244.06 | 248.06 |
| PROB: | 0      | 0.88   | 0.12   |
| RMSE: | 61.64  | 6.78   | 6.78   |

MAX\_MEAN: 102 MAX\_MED: 102 BMAD: 6.75

COFF: 20.3 HIT-CALL: 1 FITC: 41 ACTP: 1

FLAGS:

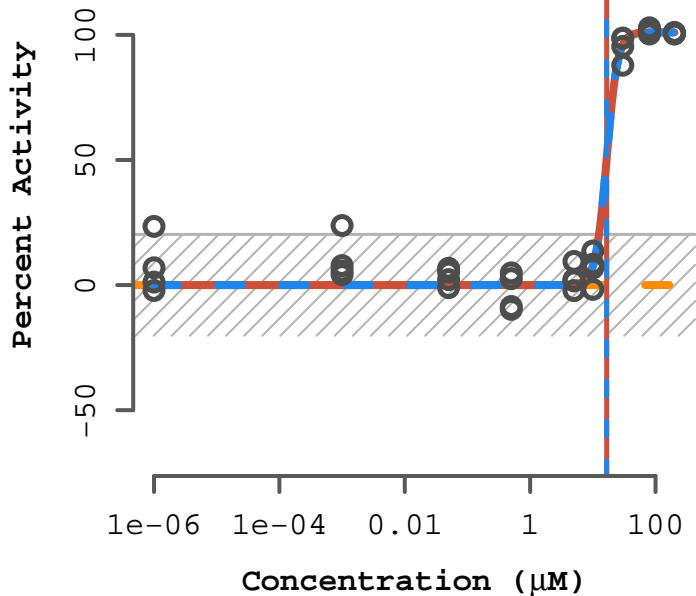

ASSAY: AEID3094 (CCTE\_Deisenroth\_DEVTOX\_RUES2-GLR\_Sox)

NAME: 6-aminopyridine-3-carboxamide

CHID: 51446 CASRN: 329-89-5

SPID(S): ES211\_7\_7

M4ID: 42675967

HILL MODEL (in red):

|      | tp   | ga     | gw    |
|------|------|--------|-------|
| val: | 101  | 1.22   | 4.95  |
| sd:  | 1.46 | 0.0304 | 0.648 |

GAIN-LOSS MODEL (in blue):

|      | tp  | ga   | gw   | la   | lw   |
|------|-----|------|------|------|------|
| val: | 101 | 1.22 | 4.95 | 3.38 | 8.79 |
| sd:  | NaN | NaN  | NaN  | NaN  | NaN  |

|       | CNST   | HILL   | GNLS   |
|-------|--------|--------|--------|
| AIC:  | 395.36 | 242.51 | 246.51 |
| PROB: | 0      | 0.88   | 0.12   |
| RMSE: | 57.69  | 7.2    | 7.2    |

MAX\_MEAN: 101 MAX\_MED: 101 BMAD: 6.75

COFF: 20.3 HIT-CALL: 1 FITC: 41 ACTP: 1

FLAGS:

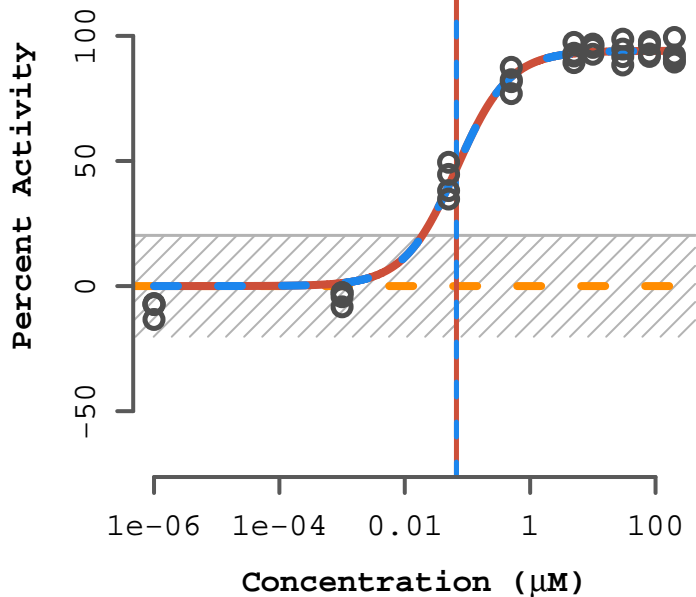

ASSAY: AEID3094 (CCTE\_Deisenroth\_DEVTOX\_RUES2-GLR\_Sox)

NAME: Pomalidomide

CHID: 893458 CASRN: 19171-19-8

SPID(S): ES211\_50\_50

M4ID: 42675933

HILL MODEL (in red):

|      |     |        |       |
|------|-----|--------|-------|
|      | tp  | ga     | gw    |
| val: | 94  | -1.18  | 1.03  |
| sd:  | 1.1 | 0.0525 | 0.116 |

GAIN-LOSS MODEL (in blue):

|      |    |       |      |     |      |
|------|----|-------|------|-----|------|
|      | tp | ga    | gw   | la  | lw   |
| val: | 94 | -1.18 | 1.03 | 4.3 | 17.9 |
| sd:  | NA | NA    | NA   | NA  | NA   |

|       |        |        |        |
|-------|--------|--------|--------|
|       | CNST   | HILL   | GNLS   |
| AIC:  | 423.35 | 228.14 | 232.14 |
| PROB: | 0      | 0.88   | 0.12   |
| RMSE: | 76.56  | 4.98   | 4.98   |

MAX\_MEAN: 95.3      MAX\_MED: 95.9      BMAD: 6.75

COFF: 20.3      HIT-CALL: 1      FITC: 41      ACTP: 1

FLAGS:



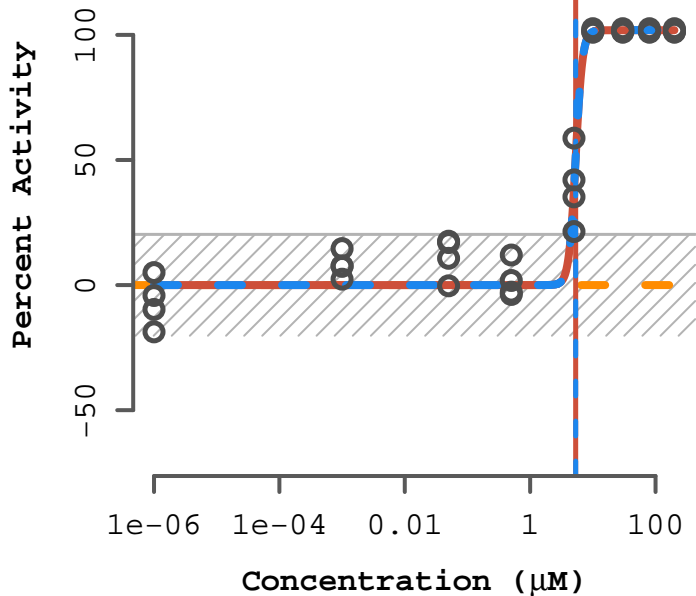

ASSAY: AEID3094 (CCTE\_Deisenroth\_DEVTOX\_RUES2-GLR\_Sox)

NAME: Tegaserod maleate

CHID: 904761 CASRN: 189188-57-6

SPID(S): ES211\_61\_61

M4ID: 42675944

HILL MODEL (in red):

|      | tp   | ga    | gw   |
|------|------|-------|------|
| val: | 102  | 0.726 | 8    |
| sd:  | 1.33 | 0.018 | 4.46 |

GAIN-LOSS MODEL (in blue):

|      | tp  | ga    | gw  | la   | lw  |
|------|-----|-------|-----|------|-----|
| val: | 102 | 0.726 | 8   | 2.45 | 18  |
| sd:  | NaN | NaN   | NaN | NaN  | NaN |

|       | CNST   | HILL   | GNLS   |
|-------|--------|--------|--------|
| AIC:  | 413.53 | 257.26 | 261.25 |
| PROB: | 0      | 0.88   | 0.12   |
| RMSE: | 69.54  | 8.22   | 8.22   |

MAX\_MEAN: 102      MAX\_MED: 102      BMAD: 6.75

COFF: 20.3      HIT-CALL: 1      FITC: 41      ACTP: 1

FLAGS:

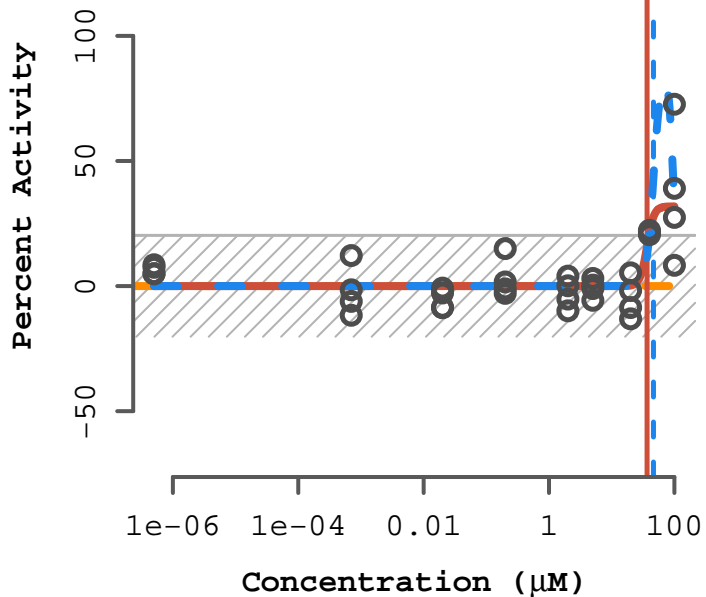

ASSAY: AEID3094 (CCTE\_Deisenroth\_DEVTOX\_RUES2-GLR\_Sox)

NAME: Ketanserin tartrate

CHID: 1003945 CASRN: 83846-83-7

SPID(S): ES211\_40\_40

M4ID: 42675959

HILL MODEL (in red):

|      | tp   | ga    | gw   |
|------|------|-------|------|
| val: | 31.8 | 1.56  | 8    |
| sd:  | 5.94 | 0.041 | 5.16 |

GAIN-LOSS MODEL (in blue):

|      | tp   | ga   | gw   | la   | lw   |
|------|------|------|------|------|------|
| val: | 87.2 | 1.67 | 7.65 | 1.98 | 11.8 |
| sd:  | NaN  | NaN  | NaN  | NaN  | NaN  |

|       | CNST  | HILL   | GNLS   |
|-------|-------|--------|--------|
| AIC:  | 295.8 | 265.65 | 269.58 |
| PROB: | 0     | 0.88   | 0.12   |
| RMSE: | 17.34 | 10.08  | 10.09  |

MAX\_MEAN: 36.9      MAX\_MED: 33.3      BMAD: 6.75

COFF: 20.3      HIT-CALL: 1      FITC: 41      ACTP: 1

FLAGS: 17

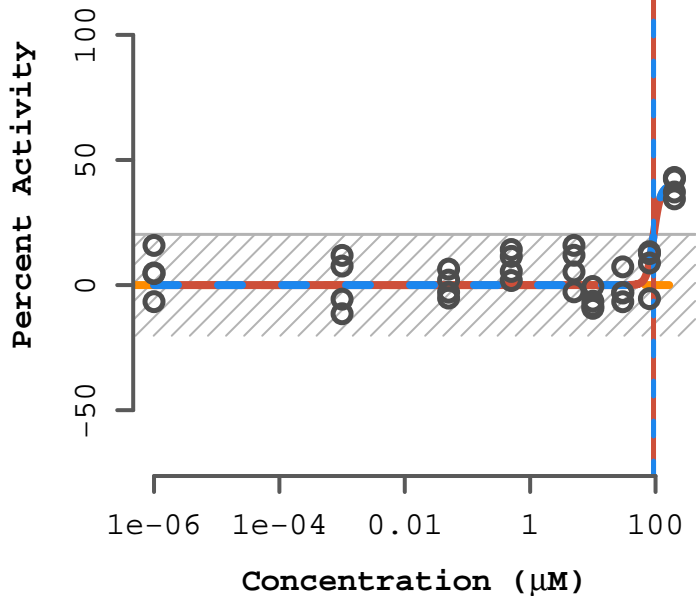

ASSAY: AEID3094 (CCTE\_Deisenroth\_DEVTOX\_RUES2-GLR\_Sox)

NAME: (2R,3S)-2-(3,4-Dihydroxyphenyl)-3,4-dihydro-2H-

CHID: 1017388 CASRN: 225937-10-0

SPID(S): ES211\_22\_22

M4ID: 42675971

HILL MODEL (in red):

|      |      |      |      |
|------|------|------|------|
|      | tp   | ga   | gw   |
| val: | 39.4 | 1.97 | 8    |
| sd:  | 4.54 | 0.31 | 37.5 |

GAIN-LOSS MODEL (in blue):

|      |      |      |     |      |      |
|------|------|------|-----|------|------|
|      | tp   | ga   | gw  | la   | lw   |
| val: | 39.7 | 1.97 | 8   | 2.78 | 4.32 |
| sd:  | NaN  | NaN  | NaN | NaN  | NaN  |

|       |       |        |        |
|-------|-------|--------|--------|
|       | CNST  | HILL   | GNLS   |
| AIC:  | 295   | 261.35 | 265.35 |
| PROB: | 0     | 0.88   | 0.12   |
| RMSE: | 15.42 | 7.79   | 7.79   |

MAX\_MEAN: 39.3      MAX\_MED: 39.8      BMAD: 6.75

COFF: 20.3      HIT-CALL: 1      FITC: 41      ACTP: 1

FLAGS: 7; 17

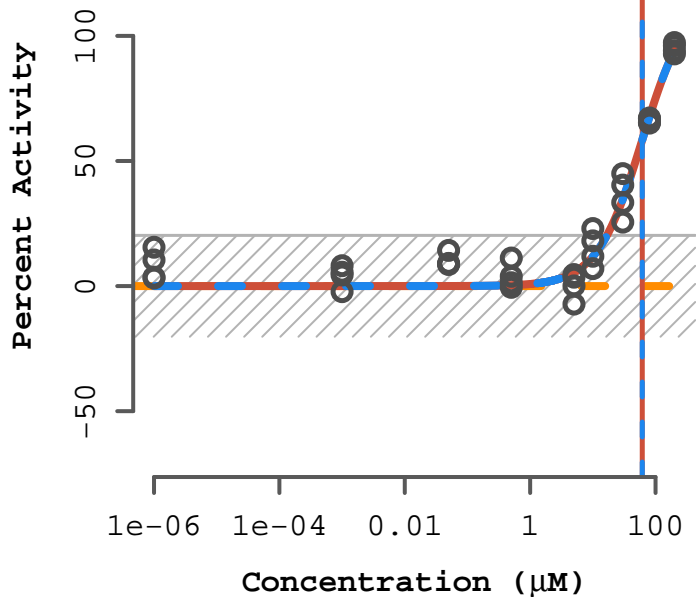

ASSAY: AEID3094 (CCTE\_Deisenroth\_DEVTOX\_RUES2-GLR\_Sox)

NAME: Diphenhydramine hydrochloride

CHID: 20537 CASRN: 147-24-0

SPID(S): ES211\_31\_31

M4ID: 42675916

HILL MODEL (in red):

|      |     |       |       |
|------|-----|-------|-------|
|      | tp  | ga    | gw    |
| val: | 117 | 1.79  | 1.2   |
| sd:  | 11  | 0.089 | 0.157 |

GAIN-LOSS MODEL (in blue):

|      |     |       |       |      |       |
|------|-----|-------|-------|------|-------|
|      | tp  | ga    | gw    | la   | lw    |
| val: | 117 | 1.79  | 1.2   | 3.2  | 11.4  |
| sd:  | 11  | 0.089 | 0.157 | 3410 | 43000 |

|       |        |        |        |
|-------|--------|--------|--------|
|       | CNST   | HILL   | GNLS   |
| AIC:  | 367.59 | 251.02 | 255.02 |
| PROB: | 0      | 0.88   | 0.12   |
| RMSE: | 41.28  | 6.87   | 6.87   |

MAX\_MEAN: 95.1 MAX\_MED: 95.1 BMAD: 6.75

COFF: 20.3 HIT-CALL: 1 FITC: 42 ACTP: 1

FLAGS:

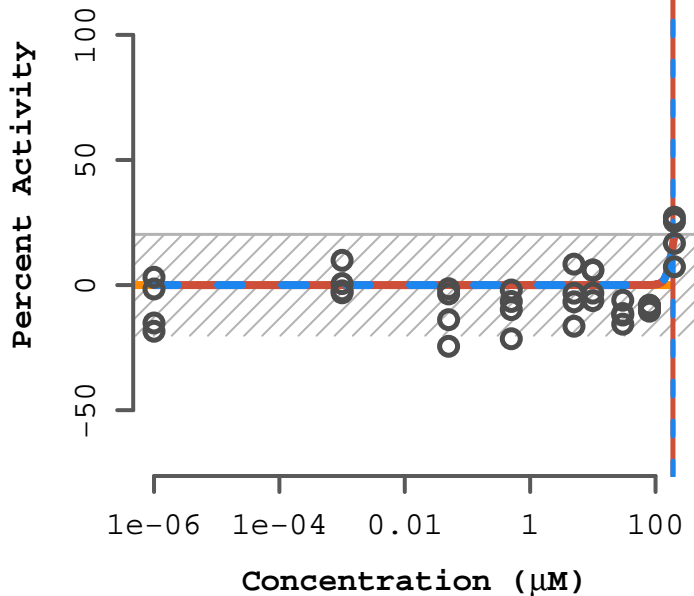

ASSAY: AEID3094 (CCTE\_Deisenroth\_DEVTOX\_RUES2-GLR\_Sox)

NAME: 5,5-Diphenylhydantoin  
 CHID: 20541 CASRN: 57-41-0  
 SPID(S): ES211\_3\_3  
 M4ID: 42675955

HILL MODEL (in red):

|      | tp   | ga    | gw   |
|------|------|-------|------|
| val: | 32.6 | 2.28  | 8    |
| sd:  | 105  | 0.424 | 11.8 |

GAIN-LOSS MODEL (in blue):

|      | tp   | ga   | gw | la   | lw |
|------|------|------|----|------|----|
| val: | 32.6 | 2.28 | 8  | 3.37 | 18 |
| sd:  | NA   | NA   | NA | NA   | NA |

|       | CNST   | HILL   | GNLS   |
|-------|--------|--------|--------|
| AIC:  | 285.71 | 280.38 | 284.38 |
| PROB: | 0.06   | 0.83   | 0.11   |
| RMSE: | 12.05  | 10.22  | 10.22  |

MAX\_MEAN: 19.1      MAX\_MED: 21      BMAD: 6.75

COFF: 20.3      HIT-CALL: 1      FITC: 42      ACTP: 0.94

FLAGS: 7; 11; 17

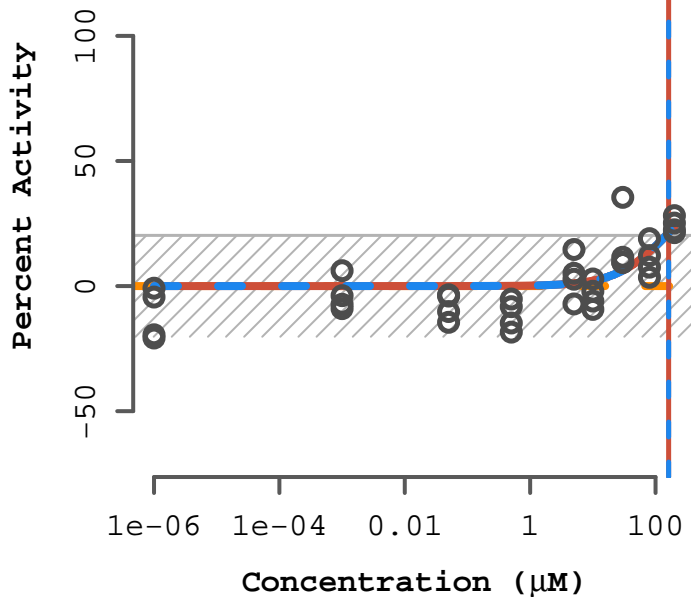

ASSAY: AEID3094 (CCTE\_Deisenroth\_DEVTOX\_RUES2-GLR\_Sox)

NAME: Ibuprofen

CHID: 20732 CASRN: 15687-27-1

SPID(S): ES211\_36\_36

M4ID: 42675917

HILL MODEL (in red):

|      | tp   | ga    | gw    |
|------|------|-------|-------|
| val: | 42.6 | 2.21  | 1.05  |
| sd:  | 49.5 | 0.979 | 0.591 |

GAIN-LOSS MODEL (in blue):

|      | tp   | ga    | gw    | la    | lw     |
|------|------|-------|-------|-------|--------|
| val: | 42.6 | 2.21  | 1.05  | 3.56  | 9.76   |
| sd:  | 49.5 | 0.979 | 0.591 | 88700 | 662000 |

|       | CNST   | HILL   | GNLS   |
|-------|--------|--------|--------|
| AIC:  | 295.77 | 275.33 | 279.33 |
| PROB: | 0      | 0.88   | 0.12   |
| RMSE: | 13.92  | 10.02  | 10.02  |

MAX\_MEAN: 24.3 MAX\_MED: 23.9 BMAD: 6.75

COFF: 20.3 HIT-CALL: 1 FITC: 42 ACTP: 1

FLAGS: 7; 11; 17

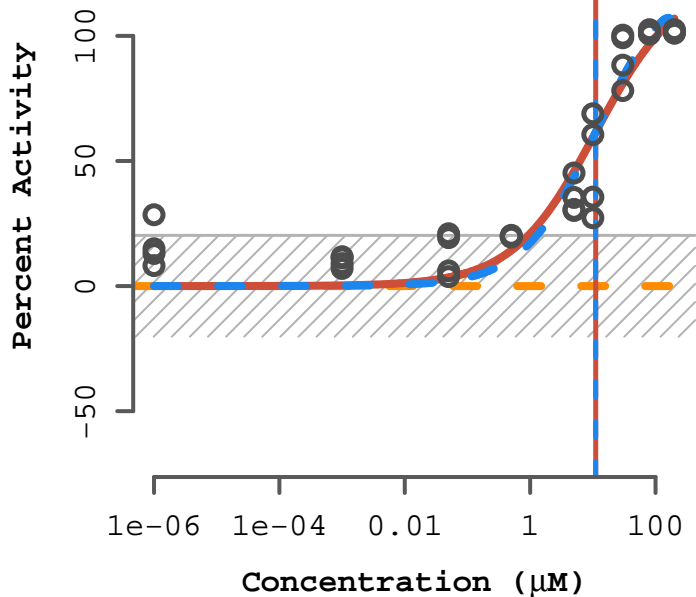

ASSAY: AEID3094 (CCTE\_Deisenroth\_DEVTOX\_RUES2-GLR\_Sox)

NAME: Lovastatin

CHID: 20784 CASRN: 75330-75-5

SPID(S): ES211\_42\_42

M4ID: 42675956

HILL MODEL (in red):

|      |      |       |       |
|------|------|-------|-------|
|      | tp   | ga    | gw    |
| val: | 123  | 1.05  | 0.656 |
| sd:  | 15.5 | 0.205 | 0.191 |

GAIN-LOSS MODEL (in blue):

|      |     |      |       |      |      |
|------|-----|------|-------|------|------|
|      | tp  | ga   | gw    | la   | lw   |
| val: | 123 | 1.05 | 0.753 | 2.42 | 9.02 |
| sd:  | NaN | NaN  | NaN   | NaN  | NaN  |

|       |        |        |        |
|-------|--------|--------|--------|
|       | CNST   | HILL   | GNLS   |
| AIC:  | 403.65 | 293.04 | 294.84 |
| PROB: | 0      | 0.71   | 0.29   |
| RMSE: | 61.47  | 12.46  | 12.16  |

MAX\_MEAN: 102 MAX\_MED: 102 BMAD: 6.75

COFF: 20.3 HIT-CALL: 1 FITC: 42 ACTP: 1

FLAGS:

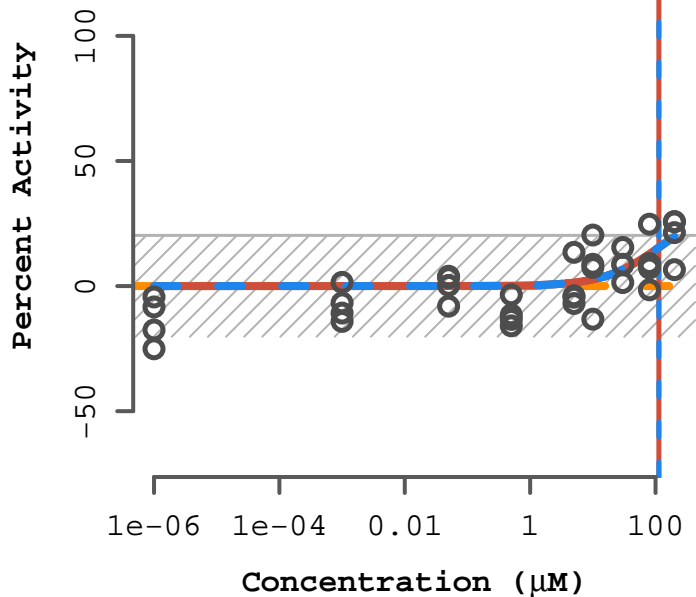

ASSAY: AEID3094 (CCTE\_Deisenroth\_DEVTOX\_RUES2-GLR\_Sox)

NAME: Methyl dopa sesquihydrate

CHID: 20863 CASRN: 41372-08-1

SPID(S): ES211\_46\_46

M4ID: 42675934

HILL MODEL (in red):

|      | tp   | ga    | gw    |
|------|------|-------|-------|
| val: | 30.9 | 2.05  | 0.978 |
| sd:  | 30.6 | 0.949 | 0.582 |

GAIN-LOSS MODEL (in blue):

|      | tp   | ga    | gw    | la   | lw   |
|------|------|-------|-------|------|------|
| val: | 30.9 | 2.05  | 0.978 | 4.3  | 3.51 |
| sd:  | 30.7 | 0.951 | 0.583 | 1050 | 1870 |

|       | CNST   | HILL   | GNLS   |
|-------|--------|--------|--------|
| AIC:  | 291.48 | 280.52 | 284.52 |
| PROB: | 0      | 0.88   | 0.12   |
| RMSE: | 12.91  | 10.17  | 10.17  |

MAX\_MEAN: 19.9      MAX\_MED: 23.5      BMAD: 6.75

COFF: 20.3      HIT-CALL: 1      FITC: 42      ACTP: 1

FLAGS: 7; 11; 17



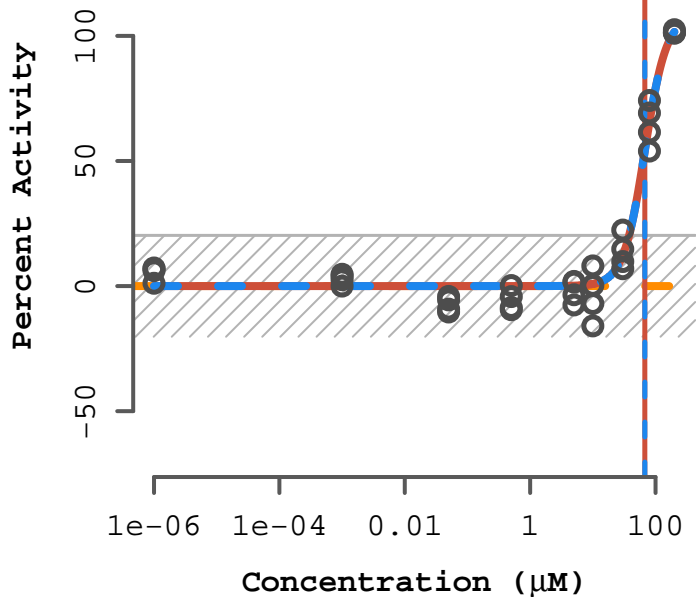

ASSAY: AEID3094 (CCTE\_Deisenroth\_DEVTOX\_RUES2-GLR\_Sox)

NAME: Rifampicin

CHID: 21244 CASRN: 13292-46-1

SPID(S): ES211\_52\_52

M4ID: 42675932

HILL MODEL (in red):

|      | tp   | ga    | gw    |
|------|------|-------|-------|
| val: | 108  | 1.83  | 2.54  |
| sd:  | 4.64 | 0.033 | 0.366 |

GAIN-LOSS MODEL (in blue):

|      | tp  | ga   | gw   | la   | lw   |
|------|-----|------|------|------|------|
| val: | 108 | 1.83 | 2.54 | 2.74 | 16.4 |
| sd:  | NaN | NaN  | NaN  | NaN  | NaN  |

|       | CNST   | HILL  | GNLS  |
|-------|--------|-------|-------|
| AIC:  | 359.69 | 245.9 | 249.9 |
| PROB: | 0      | 0.88  | 0.12  |
| RMSE: | 40.9   | 6.37  | 6.37  |

MAX\_MEAN: 102 MAX\_MED: 101 BMAD: 6.75

COFF: 20.3 HIT-CALL: 1 FITC: 42 ACTP: 1

FLAGS:

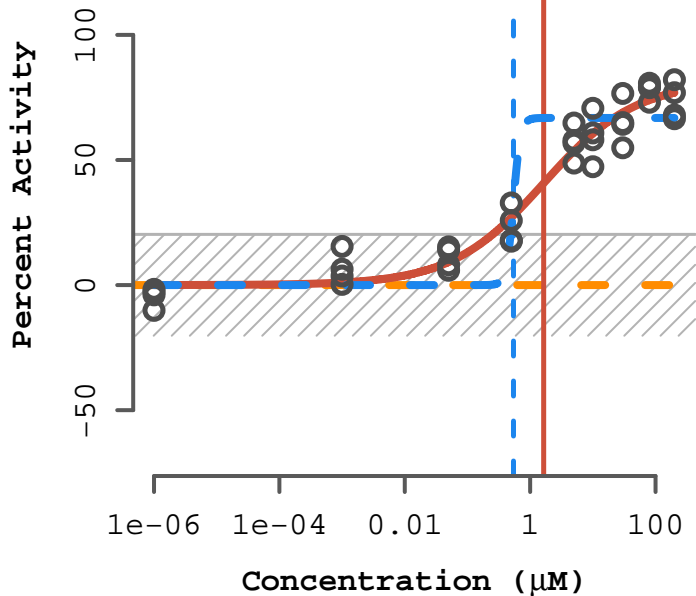

ASSAY: AEID3094 (CCTE\_Deisenroth\_DEVTOX\_RUES2-GLR\_Sox)

NAME: Thalidomide

CHID: 22524 CASRN: 50-35-1

SPID(S): ES211\_62\_62

M4ID: 42675912

HILL MODEL (in red):

|      | tp   | ga    | gw    |
|------|------|-------|-------|
| val: | 81.4 | 0.216 | 0.59  |
| sd:  | 5.23 | 0.153 | 0.101 |

GAIN-LOSS MODEL (in blue):

|      | tp   | ga     | gw   | la   | lw   |
|------|------|--------|------|------|------|
| val: | 66.8 | -0.266 | 7.74 | 4.02 | 5.24 |
| sd:  | NaN  | NaN    | NaN  | NaN  | NaN  |

|       | CNST   | HILL   | GNLS   |
|-------|--------|--------|--------|
| AIC:  | 392.55 | 252.75 | 280.47 |
| PROB: | 0      | 1      | 0      |
| RMSE: | 51.11  | 6.91   | 9.5    |

MAX\_MEAN: 78 MAX\_MED: 79.1 BMAD: 6.75

COFF: 20.3 HIT-CALL: 1 FITC: 42 ACTP: 1

FLAGS:

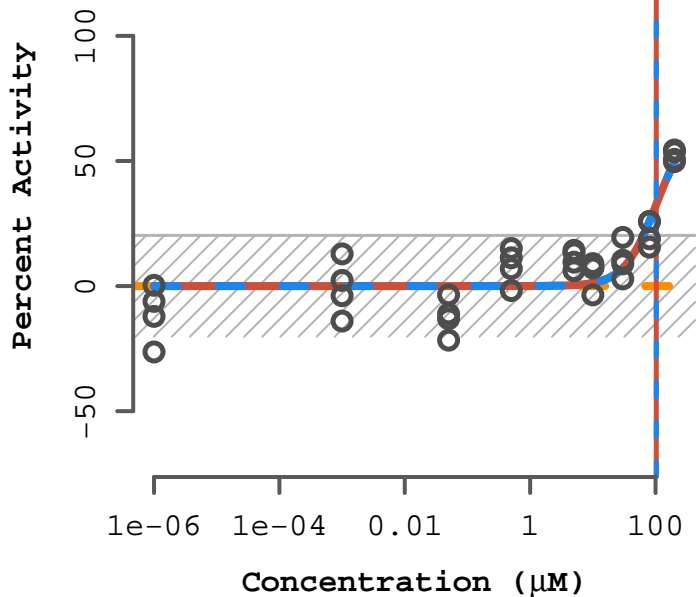

ASSAY: AEID3094 (CCTE\_Deisenroth\_DEVTOX\_RUES2-GLR\_Sox)

NAME: Carbamazepine

CHID: 22731 CASRN: 298-46-4

SPID(S): ES211\_21\_21

M4ID: 42675970

HILL MODEL (in red):

|      | tp   | ga    | gw    |
|------|------|-------|-------|
| val: | 65.3 | 2.01  | 1.69  |
| sd:  | 14.8 | 0.139 | 0.686 |

GAIN-LOSS MODEL (in blue):

|      | tp   | ga   | gw   | la   | lw |
|------|------|------|------|------|----|
| val: | 65.3 | 2.01 | 1.69 | 3.38 | 18 |
| sd:  | NA   | NA   | NA   | NA   | NA |

|       | CNST   | HILL   | GNLS   |
|-------|--------|--------|--------|
| AIC:  | 321.73 | 276.21 | 280.21 |
| PROB: | 0      | 0.88   | 0.12   |
| RMSE: | 21.44  | 9.8    | 9.8    |

MAX\_MEAN: 52.1 MAX\_MED: 52.2 BMAD: 6.75

COFF: 20.3 HIT-CALL: 1 FITC: 42 ACTP: 1

FLAGS:

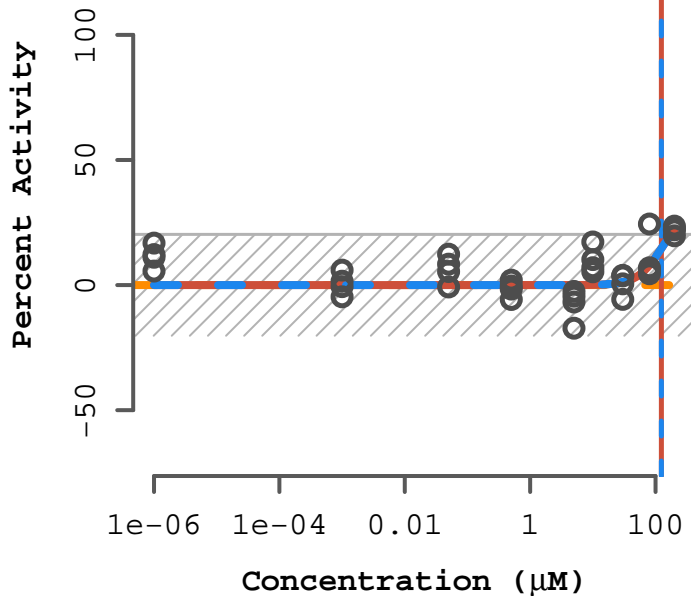

ASSAY: AEID3094 (CCTE\_Deisenroth\_DEVTOX\_RUES2-GLR\_Sox)

NAME: Valproic acid

CHID: 23733 CASRN: 99-66-1

SPID(S): ES211\_63\_63

M4ID: 42675923

HILL MODEL (in red):

|      | tp   | ga    | gw   |
|------|------|-------|------|
| val: | 29.3 | 2.09  | 2.25 |
| sd:  | 33.7 | 0.577 | 3.32 |

GAIN-LOSS MODEL (in blue):

|      | tp   | ga    | gw   | la   | lw    |
|------|------|-------|------|------|-------|
| val: | 29.3 | 2.09  | 2.25 | 3.2  | 8.18  |
| sd:  | 33.7 | 0.577 | 3.32 | 1230 | 11200 |

|       | CNST   | HILL   | GNLS   |
|-------|--------|--------|--------|
| AIC:  | 278.68 | 256.82 | 260.82 |
| PROB: | 0      | 0.88   | 0.12   |
| RMSE: | 11.16  | 7.7    | 7.7    |

MAX\_MEAN: 22 MAX\_MED: 22.3 BMAD: 6.75

COFF: 20.3 HIT-CALL: 1 FITC: 42 ACTP: 1

FLAGS: 7; 11; 17

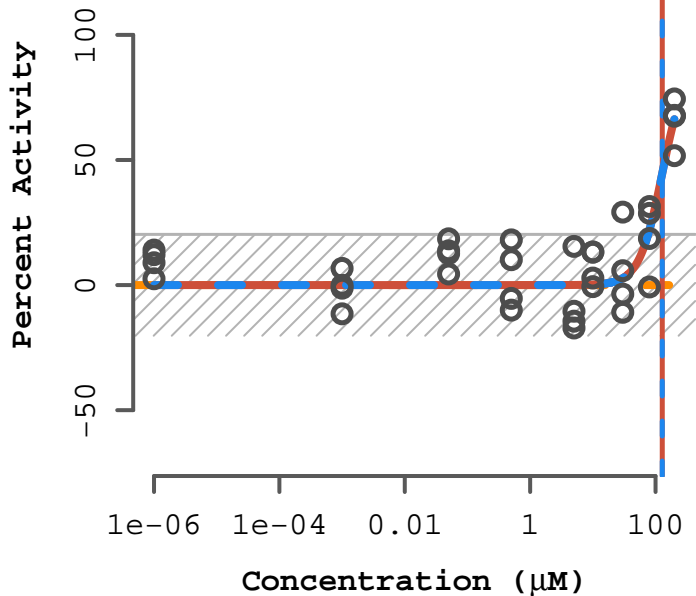

ASSAY: AEID3094 (CCTE\_Deisenroth\_DEVTOX\_RUES2-GLR\_Sox)

NAME: MEHP

CHID: 25680 CASRN: 4376-20-9

SPID(S): ES211\_44\_44

M4ID: 42675969

HILL MODEL (in red):

|      | tp   | ga    | gw   |
|------|------|-------|------|
| val: | 89.3 | 2.11  | 2.37 |
| sd:  | 129  | 0.708 | 3.93 |

GAIN-LOSS MODEL (in blue):

|      | tp   | ga   | gw   | la   | lw   |
|------|------|------|------|------|------|
| val: | 89.3 | 2.11 | 2.37 | 4.12 | 6.33 |
| sd:  | NaN  | NaN  | NaN  | NaN  | NaN  |

|       | CNST   | HILL   | GNLS   |
|-------|--------|--------|--------|
| AIC:  | 330.17 | 291.71 | 295.71 |
| PROB: | 0      | 0.88   | 0.12   |
| RMSE: | 25.62  | 11.72  | 11.72  |

MAX\_MEAN: 65.4 MAX\_MED: 67.7 BMAD: 6.75

COFF: 20.3 HIT-CALL: 1 FITC: 42 ACTP: 1

FLAGS:

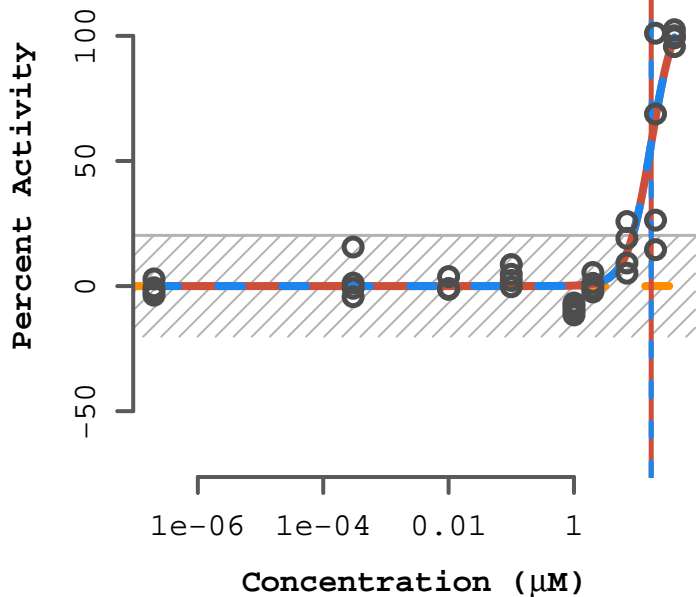

ASSAY: AEID3094 (CCTE\_Deisenroth\_DEVTOX\_RUES2-GLR\_Sox)

NAME: Dorsomorphin

CHID: 1006988 CASRN: 866405-64-3

SPID(S): ES211\_6\_6

M4ID: 42675952

HILL MODEL (in red):

|      | tp   | ga     | gw    |
|------|------|--------|-------|
| val: | 114  | 1.23   | 2.25  |
| sd:  | 11.8 | 0.0752 | 0.472 |

GAIN-LOSS MODEL (in blue):

|      | tp   | ga     | gw    | la   | lw   |
|------|------|--------|-------|------|------|
| val: | 114  | 1.23   | 2.25  | 2.33 | 9.53 |
| sd:  | 11.8 | 0.0752 | 0.472 | 489  | 6410 |

|       | CNST   | HILL   | GNLS   |
|-------|--------|--------|--------|
| AIC:  | 351.83 | 274.88 | 278.88 |
| PROB: | 0      | 0.88   | 0.12   |
| RMSE: | 39.9   | 13.61  | 13.61  |

MAX\_MEAN: 99.4      MAX\_MED: 99.6      BMAD: 6.75

COFF: 20.3      HIT-CALL: 1      FITC: 42      ACTP: 1

FLAGS:

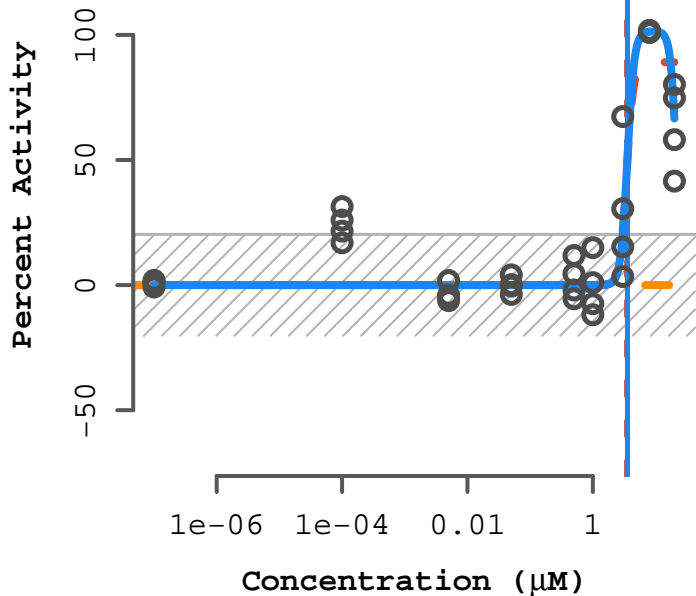

ASSAY: AEID3094 (CCTE\_Deisenroth\_DEVTOX\_RUES2-GLR\_Sox)

NAME: Ziprasidone

CHID: 23753 CASRN: 146939-27-7

SPID(S): ES211\_66\_66

M4ID: 42675936

HILL MODEL (in red):

|      | tp   | ga    | gw   |
|------|------|-------|------|
| val: | 89.1 | 0.538 | 8    |
| sd:  | 6.69 | 0.047 | 5.24 |

GAIN-LOSS MODEL (in blue):

|      | tp  | ga    | gw   | la   | lw   |
|------|-----|-------|------|------|------|
| val: | 101 | 0.552 | 7.99 | 1.33 | 9.06 |
| sd:  | NaN | NaN   | NaN  | NaN  | NaN  |

|       | CNST   | HILL  | GNLS   |
|-------|--------|-------|--------|
| AIC:  | 368.85 | 307.7 | 295.46 |
| PROB: | 0      | 0     | 1      |
| RMSE: | 43.15  | 16.48 | 13.66  |

MAX\_MEAN: 101 MAX\_MED: 101 BMAD: 6.75

COFF: 20.3 HIT-CALL: 1 FITC: 50 ACTP: 1

FLAGS:

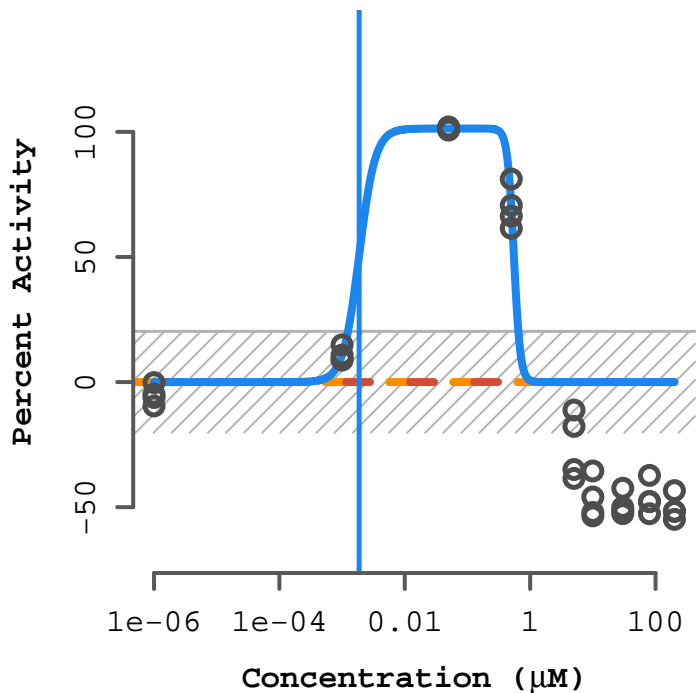

ASSAY: AEID3094 (CCTE\_Deisenroth\_DEVTOX\_RUES2-GLR\_Sox)

NAME: Adriamycin hydrochloride

CHID: 30636 CASRN: 25316-40-9

SPID(S): ES211\_67\_67

M4ID: 42675905

HILL MODEL (in red):

|      | tp   | ga  | gw  |
|------|------|-----|-----|
| val: | 81.1 | 2.8 | 8   |
| sd:  | NaN  | NaN | NaN |

GAIN-LOSS MODEL (in blue):

|      | tp  | ga    | gw   | la    | lw   |
|------|-----|-------|------|-------|------|
| val: | 101 | -2.73 | 3.38 | -0.26 | 8.39 |
| sd:  | NaN | NaN   | NaN  | NaN   | NaN  |

|       | CNST   | HILL   | GNLS   |
|-------|--------|--------|--------|
| AIC:  | 394.89 | 400.89 | 371.68 |
| PROB: | 0      | 0      | 1      |
| RMSE: | 53.29  | 53.29  | 33.8   |

MAX\_MEAN: 101 MAX\_MED: 101 BMAD: 6.75

COFF: 20.3 HIT-CALL: 1 FITC: 50 ACTP: 1

FLAGS: 10



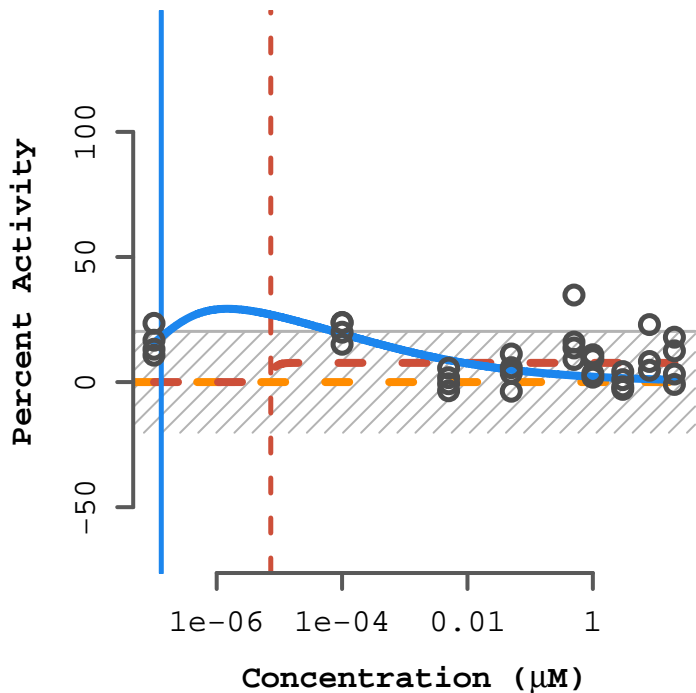

ASSAY: AEID3094 (CCTE\_Deisenroth\_DEVTOX\_RUES2-GLR\_Sox)

NAME: Dexamethasone sodium phosphate

CHID: 47429 CASRN: 2392-39-4

SPID(S): ES211\_28\_28

M4ID: 42675920

HILL MODEL (in red):

|      | tp   | ga    | gw    |
|------|------|-------|-------|
| val: | 7.67 | -5.14 | 7.58  |
| sd:  | 1.83 | 1670  | 11100 |

GAIN-LOSS MODEL (in blue):

|      | tp   | ga    | gw   | la    | lw  |
|------|------|-------|------|-------|-----|
| val: | 41.8 | -6.88 | 1.07 | -4.22 | 0.3 |
| sd:  | NaN  | NaN   | NaN  | NaN   | NaN |

|       | CNST   | HILL   | GNLS   |
|-------|--------|--------|--------|
| AIC:  | 283.94 | 274.02 | 263.66 |
| PROB: | 0      | 0.01   | 0.99   |
| RMSE: | 13.32  | 10.52  | 9.39   |

MAX\_MEAN: 20.7 MAX\_MED: 21.8 BMAD: 6.75

COFF: 20.3 HIT-CALL: 1 FITC: 50 ACTP: 1

FLAGS: 7; 11; 17

Percent Activity

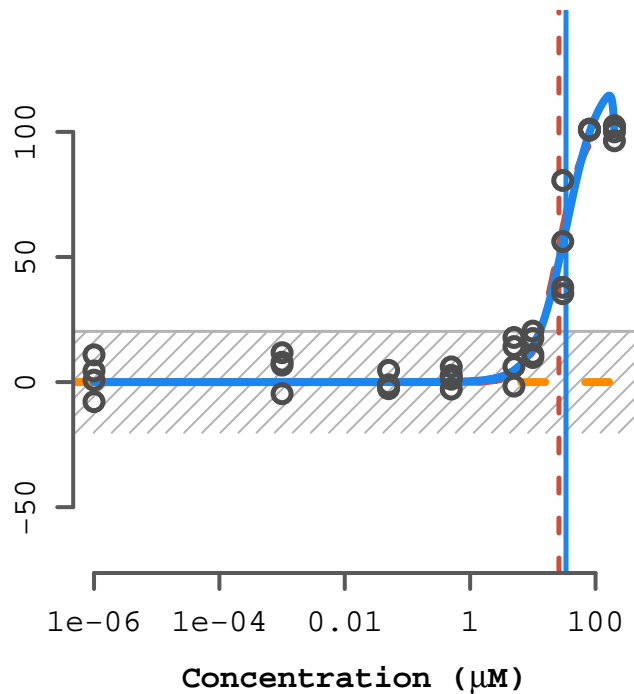

ASSAY: AEID3094 (CCTE\_Deisenroth\_DEVTOX\_RUES2-GLR\_Sox)

NAME: Esomeprazole magnesium hydrate

CHID: 746660 CASRN: 668985-31-7

SPID(S): ES211\_43\_43

M4ID: 42675951

HILL MODEL (in red):

|      | tp   | ga     | gw    |
|------|------|--------|-------|
| val: | 106  | 1.42   | 2.03  |
| sd:  | 3.52 | 0.0506 | 0.271 |

GAIN-LOSS MODEL (in blue):

|      | tp   | ga     | gw    | la      | lw   |
|------|------|--------|-------|---------|------|
| val: | 123  | 1.53   | 1.69  | 2.34    | 18   |
| sd:  | 12.6 | 0.0846 | 0.251 | 0.00572 | 5.21 |

|       | CNST   | HILL   | GNLS   |
|-------|--------|--------|--------|
| AIC:  | 384.57 | 262.87 | 258.75 |
| PROB: | 0      | 0.11   | 0.89   |
| RMSE: | 51.46  | 8.7    | 8.01   |

MAX\_MEAN: 101 MAX\_MED: 101 BMAD: 6.75

COFF: 20.3 HIT-CALL: 1 FITC: 50 ACTP: 1

FLAGS:

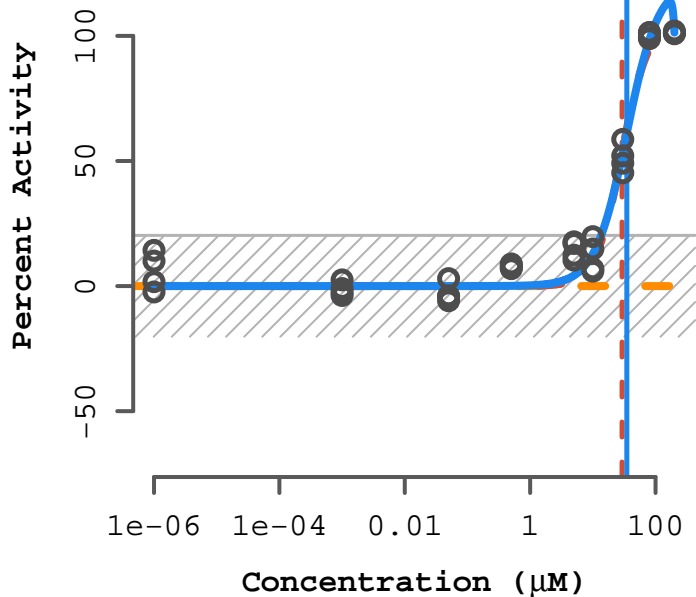

ASSAY: AEID3094 (CCTE\_Deisenroth\_DEVTOX\_RUES2-GLR\_Sox)

NAME: Mianserin hydrochloride

CHID: 944145 CASRN: 21535-47-7

SPID(S): ES211\_47\_47

M4ID: 42675904

HILL MODEL (in red):

|      | tp  | ga     | gw    |
|------|-----|--------|-------|
| val: | 106 | 1.47   | 2.09  |
| sd:  | 3.5 | 0.0292 | 0.385 |

GAIN-LOSS MODEL (in blue):

|      | tp   | ga    | gw    | la      | lw   |
|------|------|-------|-------|---------|------|
| val: | 122  | 1.54  | 1.71  | 2.35    | 17.9 |
| sd:  | 11.8 | 0.063 | 0.303 | 0.00557 | 4.92 |

|       | CNST   | HILL   | GNLS  |
|-------|--------|--------|-------|
| AIC:  | 384.33 | 252.43 | 247.4 |
| PROB: | 0      | 0.07   | 0.93  |
| RMSE: | 51.11  | 6.88   | 6.18  |

MAX\_MEAN: 101 MAX\_MED: 101 BMAD: 6.75

COFF: 20.3 HIT-CALL: 1 FITC: 50 ACTP: 1

FLAGS:

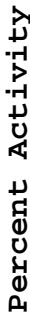

**NAME:** Retinol

```
SPID(S): ES211 51 51
```

**M4ID: 42675927**

|      | tp   | ga     | gw    |
|------|------|--------|-------|
| val: | 93.5 | 1.3    | 2.46  |
| sd:  | 2.52 | 0.0375 | 0.327 |

|      | tp   | ga    | gw   | la      | lw   |
|------|------|-------|------|---------|------|
| val: | 117  | 1.53  | 1.64 | 2.34    | 15.7 |
| sd:  | 29.8 | 0.244 | 0.46 | 0.00608 | 9.54 |

MAX MEAN: 94.3      MAX MED: 94.5      BMAD: 6.75

COFF: 20.3 HIT-CALL: 1 FITC: 51 ACTP: 1

**FLAGS :**
