# Supplementary material for: The DevTox Germ Layer Reporter Platform: An Assay Adaptation of the Human Pluripotent Stem Cell Test
Source: MDPI journal article supplement (doi:10.3390/toxics10070392), 2022-07-13
Supplement: s1 [file s1]

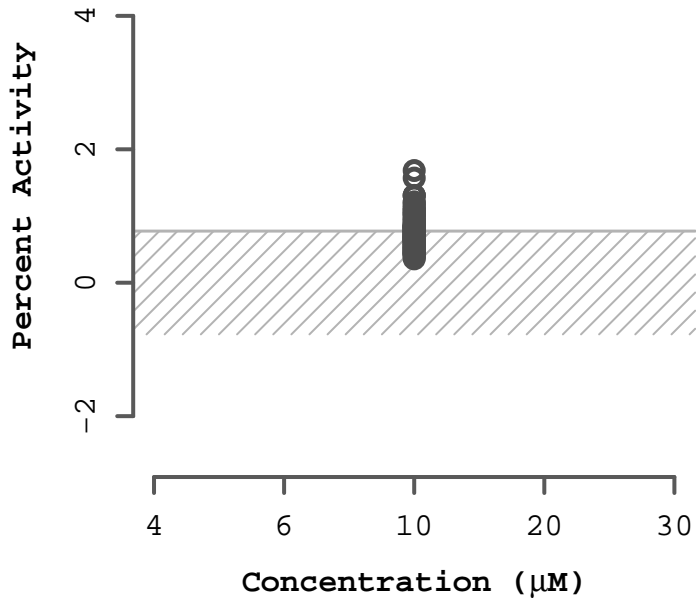

ASSAY: AEID3096 (CCTE\_Deisenroth\_DEVTOX\_RUES2-GLR\_Bra

NAME: SB-431542

CHID: 42693 CASRN: 301836-41-9

SPID(S): ES211\_56\_56

M4ID: 42676087

HILL MODEL: Not applicable.

GAIN-LOSS MODEL: Not applicable.

|       | CNST | HILL | GNLS |
|-------|------|------|------|
| AIC:  | NA   | NA   | NA   |
| PROB: | NA   | NA   | NA   |
| RMSE: | NA   | NA   | NA   |

MAX\_MEAN: 0.765 MAX\_MED: 0.731 BMAD: 0.258

COFF: 0.774 HIT-CALL: -1 FITC: 2 ACTP: NA

FLAGS:

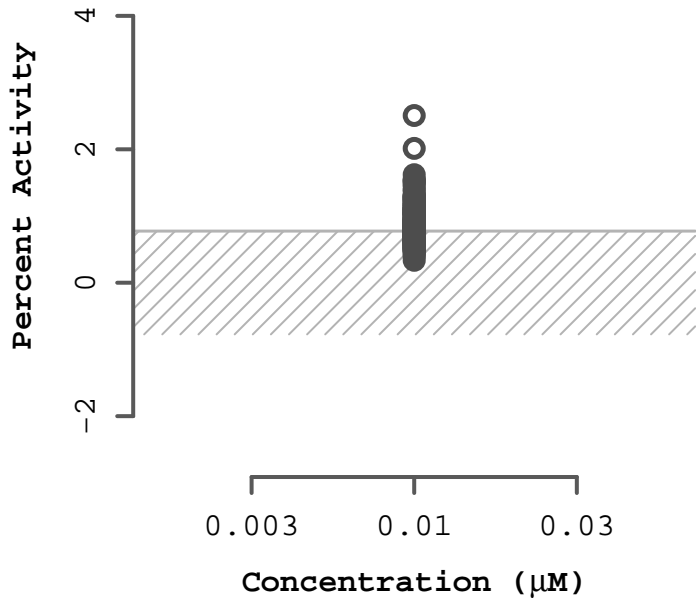

ASSAY: AEID3096 (CCTE\_Deisenroth\_DEVTOX\_RUES2-GLR\_Bra

NAME: DMSO (spid not in DB)

CHID: NA CASRN: NA

SPID(S): DMSO

M4ID: 42676049

HILL MODEL: Not applicable.

GAIN-LOSS MODEL: Not applicable.

|       | CNST | HILL | GNLS |
|-------|------|------|------|
| AIC:  | NA   | NA   | NA   |
| PROB: | NA   | NA   | NA   |
| RMSE: | NA   | NA   | NA   |

MAX\_MEAN: 0.884 MAX\_MED: 0.828 BMAD: 0.258

COFF: 0.774 HIT-CALL: -1 FITC: 2 ACTP: NA

FLAGS:

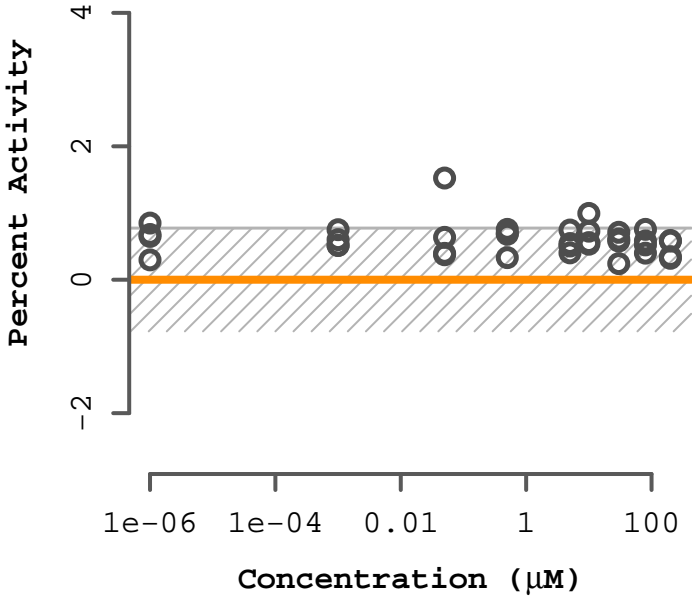

ASSAY: AEID3096 (CCTE\_Deisenroth\_DEVTOX\_RUES2-GLR\_Bra\_

NAME: Hydroxyurea

CHID: 25438 CASRN: 127-07-1

SPID(S): ES211\_35\_35

M4ID: 42676097

HILL MODEL: Not applicable.

GAIN-LOSS MODEL: Not applicable.

|       |      |      |      |
|-------|------|------|------|
|       | CNST | HILL | GNLS |
| AIC:  | 78.1 | NA   | NA   |
| PROB: | 1    | NA   | NA   |
| RMSE: | 0.64 | NA   | NA   |

MAX\_MEAN: 0.733 MAX\_MED: 0.69 BMAD: 0.258

COFF: 0.774 HIT-CALL: 0 FITC: 4 ACTP: 0

FLAGS:

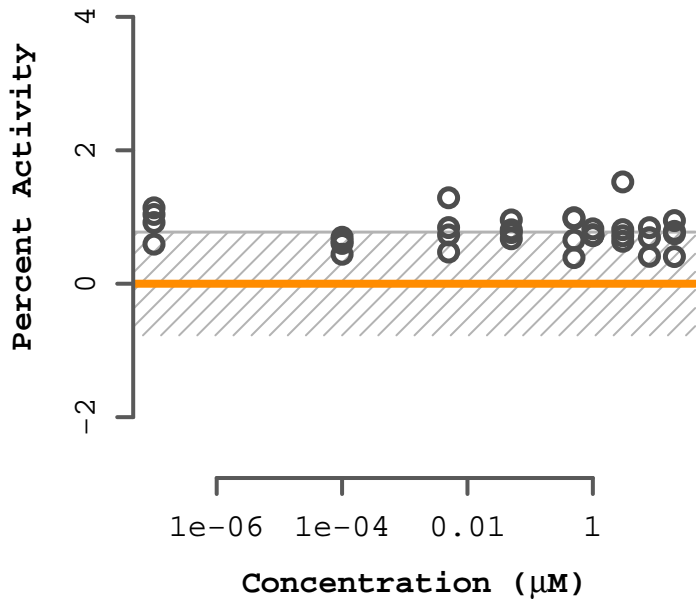

ASSAY: AEID3096 (CCTE\_Deisenroth\_DEVTOX\_RUES2-GLR\_Bra\_

NAME: Dexamethasone sodium phosphate

CHID: 47429 CASRN: 2392-39-4

SPID(S): ES211\_28\_28

M4ID: 42676103

HILL MODEL: Failed to converge.

GAIN-LOSS MODEL: Failed to converge.

|       |       |      |      |
|-------|-------|------|------|
|       | CNST  | HILL | GNLS |
| AIC:  | 93.73 | NA   | NA   |
| PROB: | 1     | NA   | NA   |
| RMSE: | 0.81  | NA   | NA   |

MAX\_MEAN: 0.923 MAX\_MED: 0.979 BMAD: 0.258

COFF: 0.774 HIT-CALL: 0 FITC: 7 ACTP: 0

FLAGS: 8; 10

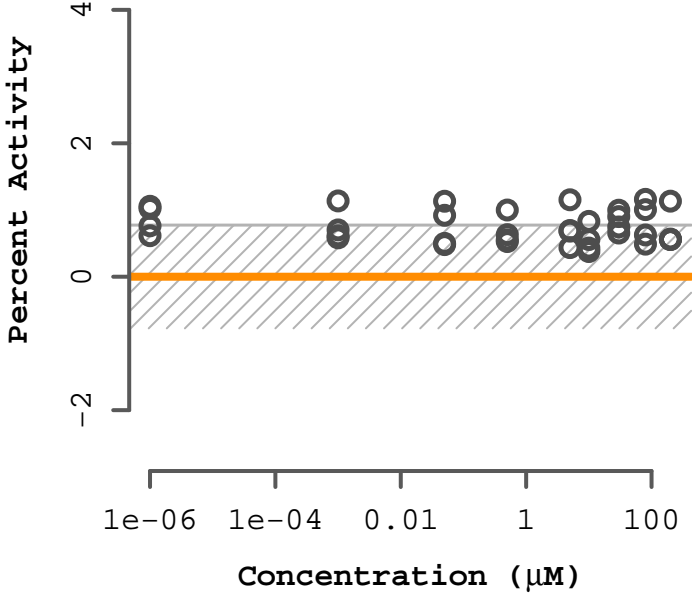

ASSAY: AEID3096 (CCTE\_Deisenroth\_DEVTOX\_RUES2-GLR\_Bra\_

NAME: Pomalidomide

CHID: 893458 CASRN: 19171-19-8

SPID(S): ES211\_50\_50

M4ID: 42676070

HILL MODEL: Failed to converge.

GAIN-LOSS MODEL: Failed to converge.

|       |       |      |      |
|-------|-------|------|------|
|       | CNST  | HILL | GNLS |
| AIC:  | 93.67 | NA   | NA   |
| PROB: | 1     | NA   | NA   |
| RMSE: | 0.78  | NA   | NA   |

MAX\_MEAN: 0.865 MAX\_MED: 0.894 BMAD: 0.258

COFF: 0.774 HIT-CALL: 0 FITC: 7 ACTP: 0

FLAGS: 8; 10

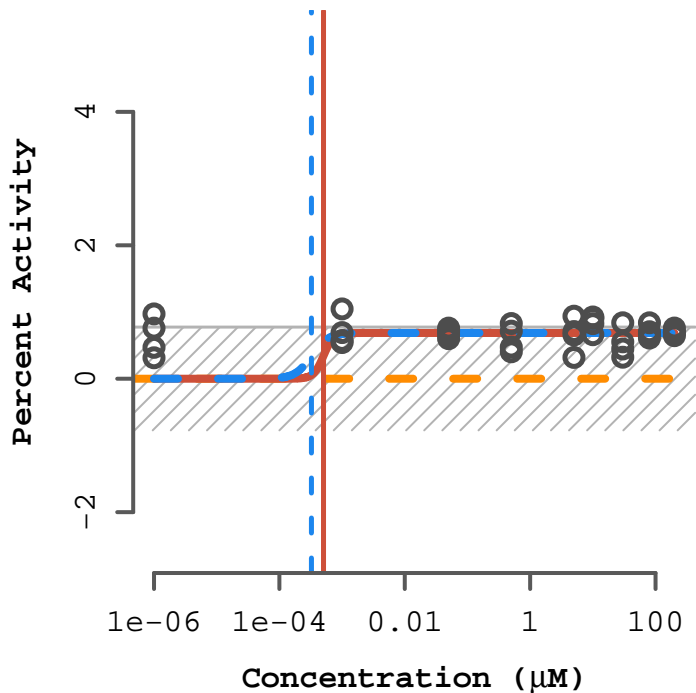

ASSAY: AEID3096 (CCTE\_Deisenroth\_DEVTOX\_RUES2-GLR\_Bra\_

NAME: Acetaminophen

CHID: 20006 CASRN: 103-90-2

SPID(S): ES211\_9\_9

M4ID: 42676089

HILL MODEL (in red):

|      | tp     | ga   | gw   |
|------|--------|------|------|
| val: | 0.686  | -3.3 | 5.49 |
| sd:  | 0.0371 | 4.62 | 85.8 |

GAIN-LOSS MODEL (in blue):

|      | tp    | ga    | gw   | la   | lw   |
|------|-------|-------|------|------|------|
| val: | 0.686 | -3.49 | 3.33 | 3.92 | 4.88 |
| sd:  | NaN   | NaN   | NaN  | NaN  | NaN  |

|       | CNST  | HILL | GNLS  |
|-------|-------|------|-------|
| AIC:  | 85.96 | 9.71 | 13.71 |
| PROB: | 0     | 0.88 | 0.12  |
| RMSE: | 0.7   | 0.28 | 0.28  |

MAX\_MEAN: 0.829 MAX\_MED: 0.865 BMAD: 0.258

COFF: 0.774 HIT-CALL: 0 FITC: 20 ACTP: 1

FLAGS: 12

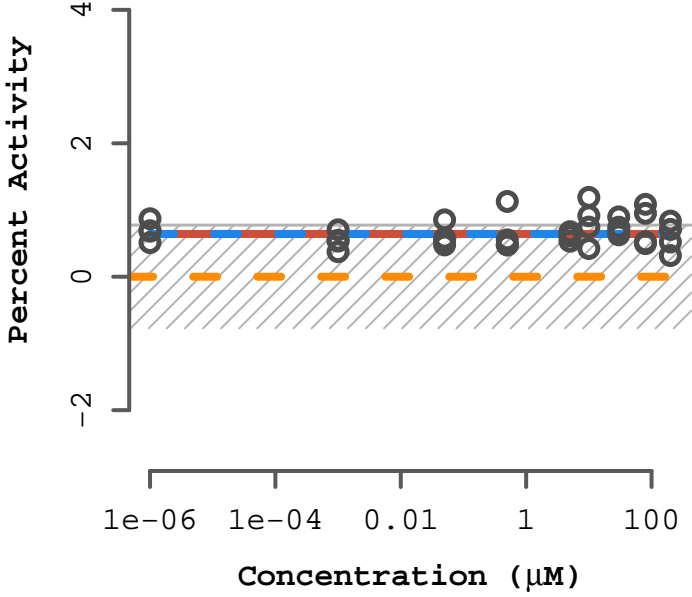

ASSAY: AEID3096 (CCTE\_Deisenroth\_DEVTOX\_RUES2-GLR\_Bra\_

NAME: Boric acid ( $\text{H}_3\text{BO}_3$ )

CHID: 20194 CASRN: 10043-35-3

SPID(S): ES211\_17\_17

M4ID: 42676065

HILL MODEL (in red):

|      |        |     |      |
|------|--------|-----|------|
|      | tp     | ga  | gw   |
| val: | 0.641  | -7  | 7.02 |
| sd:  | 0.0335 | 186 | 1200 |

GAIN-LOSS MODEL (in blue):

|      |       |    |     |     |    |
|------|-------|----|-----|-----|----|
|      | tp    | ga | gw  | la  | lw |
| val: | 0.641 | -7 | 7.1 | 4.3 | 18 |
| sd:  | NA    | NA | NA  | NA  | NA |

|       |       |       |      |
|-------|-------|-------|------|
|       | CNST  | HILL  | GNLS |
| AIC:  | 85.79 | -2.29 | 1.71 |
| PROB: | 0     | 0.88  | 0.12 |
| RMSE: | 0.7   | 0.21  | 0.21 |

MAX\_MEAN: 0.818 MAX\_MED: 0.83 BMAD: 0.258

COFF: 0.774 HIT-CALL: 0 FITC: 20 ACTP: 1

FLAGS: 12

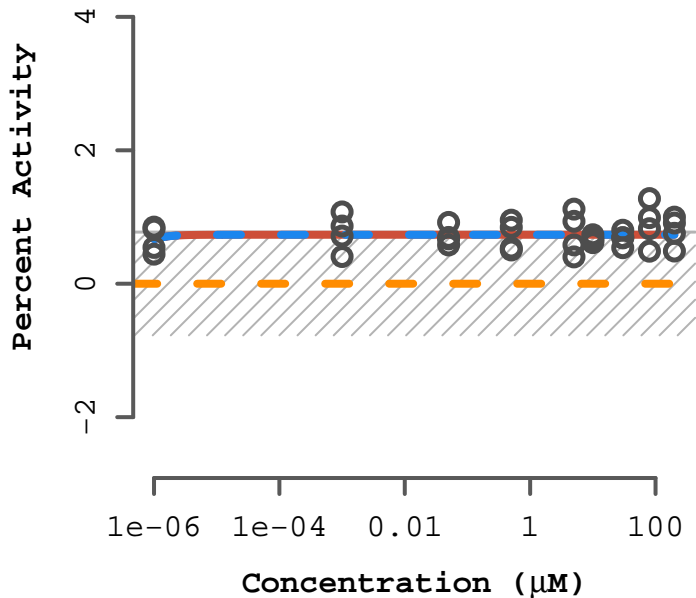

ASSAY: AEID3096 (CCTE\_Deisenroth\_DEVTOX\_RUES2-GLR\_Bra\_

NAME: Ethylene glycol

CHID: 20597 CASRN: 107-21-1

SPID(S): ES211\_32\_32

M4ID: 42676050

HILL MODEL (in red):

|      | tp     | ga    | gw   |
|------|--------|-------|------|
| val: | 0.734  | -6.47 | 2.14 |
| sd:  | 0.0387 | 8.22  | 37.5 |

GAIN-LOSS MODEL (in blue):

|      | tp     | ga    | gw   | la   | lw     |
|------|--------|-------|------|------|--------|
| val: | 0.734  | -6.48 | 2.09 | 2.92 | 17.6   |
| sd:  | 0.0387 | 8.77  | 38.2 | 5270 | 131000 |

|       | CNST  | HILL | GNLS |
|-------|-------|------|------|
| AIC:  | 92.68 | 0.29 | 4.29 |
| PROB: | 0     | 0.88 | 0.12 |
| RMSE: | 0.77  | 0.21 | 0.21 |

MAX\_MEAN: 0.895 MAX\_MED: 0.908 BMAD: 0.258

COFF: 0.774 HIT-CALL: 0 FITC: 20 ACTP: 1

FLAGS: 8; 12



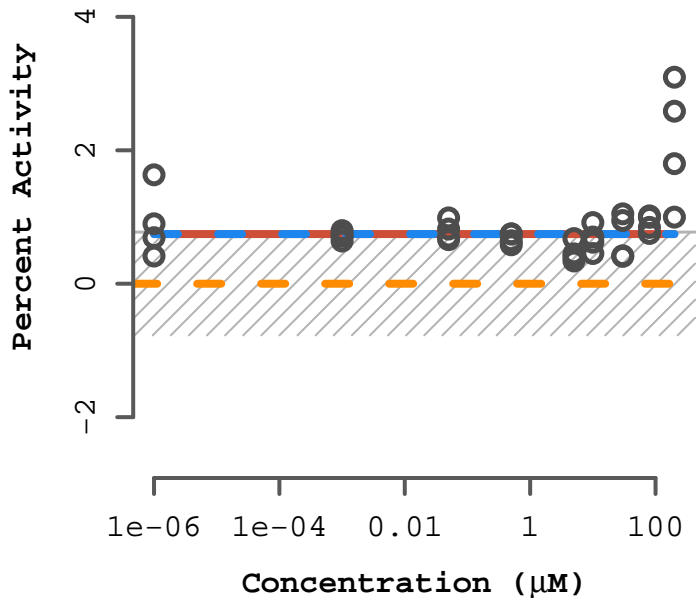

ASSAY: AEID3096 (CCTE\_Deisenroth\_DEVTOX\_RUES2-GLR\_Bra\_

NAME: Busulfan

CHID: 20910 CASRN: 55-98-1

SPID(S): ES211\_18\_18

M4ID: 42676080

HILL MODEL (in red):

|      |        |     |      |
|------|--------|-----|------|
|      | tp     | ga  | gw   |
| val: | 0.745  | -7  | 6.59 |
| sd:  | 0.0493 | 262 | 1650 |

GAIN-LOSS MODEL (in blue):

|      |       |     |     |     |     |
|------|-------|-----|-----|-----|-----|
|      | tp    | ga  | gw  | la  | lw  |
| val: | 0.745 | -7  | 6.5 | 2.9 | 18  |
| sd:  | NaN   | NaN | NaN | NaN | NaN |

|       |        |       |       |
|-------|--------|-------|-------|
|       | CNST   | HILL  | GNLS  |
| AIC:  | 108.43 | 46.22 | 50.22 |
| PROB: | 0      | 0.88  | 0.12  |
| RMSE: | 1.05   | 0.58  | 0.58  |

MAX\_MEAN: 2.12 MAX\_MED: 2.19 BMAD: 0.258

COFF: 0.774 HIT-CALL: 0 FITC: 20 ACTP: 1

FLAGS: 8; 12

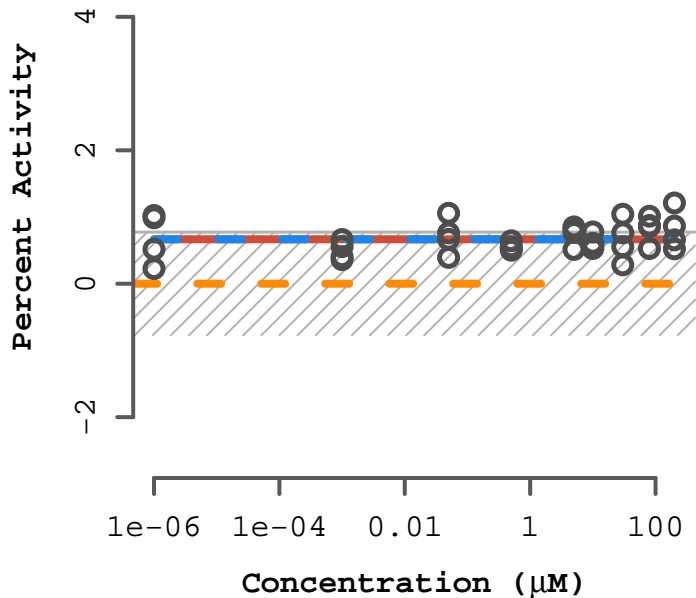

ASSAY: AEID3096 (CCTE\_Deisenroth\_DEVTOX\_RUES2-GLR\_Bra\_

NAME: Nicotinic acid

CHID: 20932 CASRN: 59-67-6

SPID(S): ES211\_48\_48

M4ID: 42676105

HILL MODEL (in red):

|      | tp     | ga  | gw   |
|------|--------|-----|------|
| val: | 0.666  | -7  | 7.14 |
| sd:  | 0.0401 | 341 | 2200 |

GAIN-LOSS MODEL (in blue):

|      | tp     | ga  | gw   | la   | lw   |
|------|--------|-----|------|------|------|
| val: | 0.666  | -7  | 6.91 | 4    | 4.97 |
| sd:  | 0.0401 | 299 | 1930 | 2130 | 6200 |

|       | CNST  | HILL | GNLS  |
|-------|-------|------|-------|
| AIC:  | 87.47 | 7.87 | 11.87 |
| PROB: | 0     | 0.88 | 0.12  |
| RMSE: | 0.72  | 0.23 | 0.23  |

MAX\_MEAN: 0.818 MAX\_MED: 0.865 BMAD: 0.258

COFF: 0.774 HIT-CALL: 0 FITC: 20 ACTP: 1

FLAGS: 8; 12

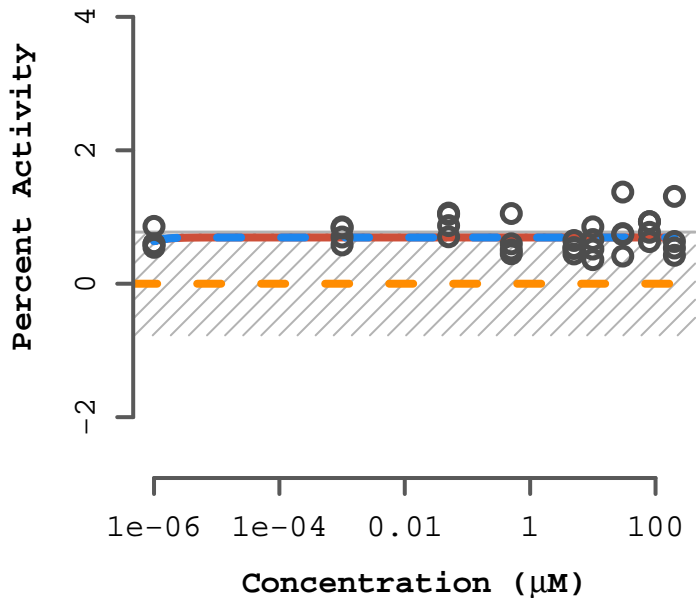

ASSAY: AEID3096 (CCTE\_Deisenroth\_DEVTOX\_RUES2-GLR\_Bra

NAME: 1,2-Propylene glycol

CHID: 21206 CASRN: 57-55-6

SPID(S): ES211\_1\_1

M4ID: 42676067

HILL MODEL (in red):

|      | tp     | ga    | gw   |
|------|--------|-------|------|
| val: | 0.693  | -6.44 | 2.37 |
| sd:  | 0.0415 | 7.99  | 42.6 |

GAIN-LOSS MODEL (in blue):

|      | tp    | ga    | gw   | la   | lw   |
|------|-------|-------|------|------|------|
| val: | 0.693 | -6.39 | 2.73 | 3.11 | 17.8 |
| sd:  | NaN   | NaN   | NaN  | NaN  | NaN  |

|       | CNST  | HILL | GNLS  |
|-------|-------|------|-------|
| AIC:  | 91.07 | 6.96 | 10.96 |
| PROB: | 0     | 0.88 | 0.12  |
| RMSE: | 0.76  | 0.24 | 0.24  |

MAX\_MEAN: 0.919 MAX\_MED: 0.955 BMAD: 0.258

COFF: 0.774 HIT-CALL: 0 FITC: 20 ACTP: 1

FLAGS: 8; 12

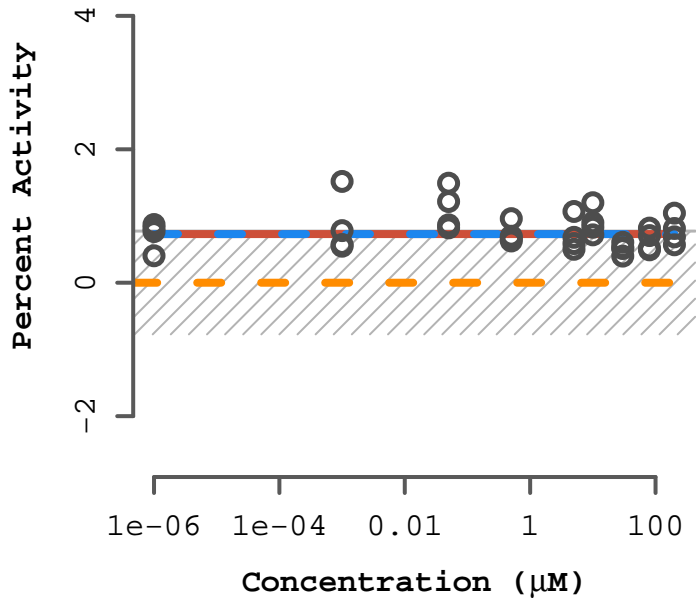

ASSAY: AEID3096 (CCTE\_Deisenroth\_DEVTOX\_RUES2-GLR\_Bra\_

NAME: Saccharin

CHID: 21251 CASRN: 81-07-2

SPID(S): ES211\_54\_54

M4ID: 42676094

HILL MODEL (in red):

|      | tp     | ga    | gw   |
|------|--------|-------|------|
| val: | 0.729  | -6.97 | 7.42 |
| sd:  | 0.0396 | 305   | 1930 |

GAIN-LOSS MODEL (in blue):

|      | tp     | ga  | gw   | la   | lw    |
|------|--------|-----|------|------|-------|
| val: | 0.729  | -7  | 6.62 | 3.59 | 7.12  |
| sd:  | 0.0396 | 234 | 1470 | 5020 | 27900 |

|       | CNST  | HILL  | GNLS  |
|-------|-------|-------|-------|
| AIC:  | 96.42 | 12.96 | 16.96 |
| PROB: | 0     | 0.88  | 0.12  |
| RMSE: | 0.82  | 0.27  | 0.27  |

MAX\_MEAN: 1.1 MAX\_MED: 1.04 BMAD: 0.258

COFF: 0.774 HIT-CALL: 0 FITC: 20 ACTP: 1

FLAGS: 8; 12

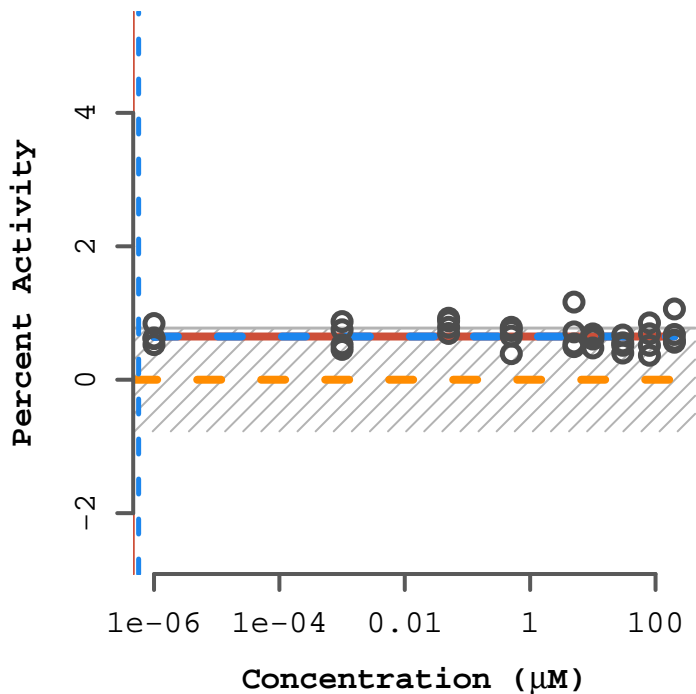

ASSAY: AEID3096 (CCTE\_Deisenroth\_DEVTOX\_RUES2-GLR\_Bra\_

NAME: Dimethyl phthalate

CHID: 22455 CASRN: 131-11-3

SPID(S): ES211\_30\_30

M4ID: 42676098

HILL MODEL (in red):

|      | tp     | ga    | gw   |
|------|--------|-------|------|
| val: | 0.648  | -6.35 | 5.65 |
| sd:  | 0.0324 | 0.873 | 15.1 |

GAIN-LOSS MODEL (in blue):

|      | tp    | ga    | gw | la  | lw |
|------|-------|-------|----|-----|----|
| val: | 0.648 | -6.25 | 8  | 4.3 | 17 |
| sd:  | NA    | NA    | NA | NA  | NA |

|       | CNST  | HILL   | GNLS  |
|-------|-------|--------|-------|
| AIC:  | 84.67 | -13.08 | -9.08 |
| PROB: | 0     | 0.88   | 0.12  |
| RMSE: | 0.69  | 0.18   | 0.18  |

MAX\_MEAN: 0.821 MAX\_MED: 0.835 BMAD: 0.258

COFF: 0.774 HIT-CALL: 0 FITC: 20 ACTP: 1

FLAGS: 12

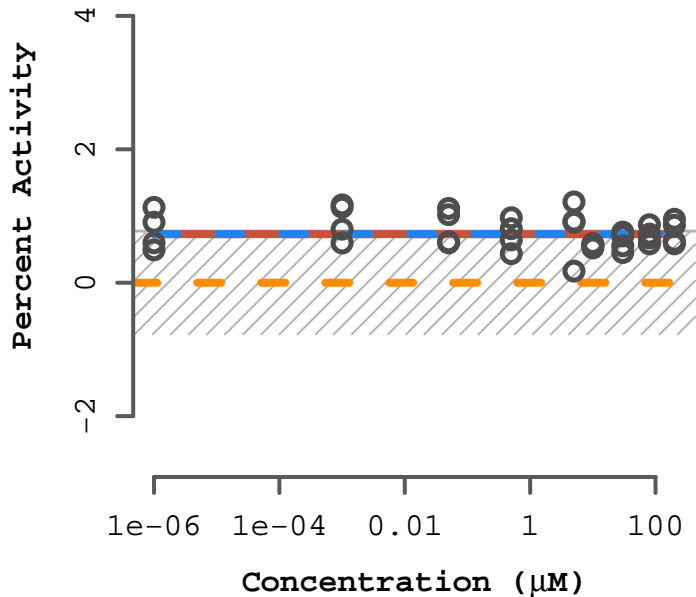

ASSAY: AEID3096 (CCTE\_Deisenroth\_DEVTOX\_RUES2-GLR\_Bra\_

NAME: Thalidomide

CHID: 22524 CASRN: 50-35-1

SPID(S): ES211\_62\_62

M4ID: 42676106

HILL MODEL (in red):

|      | tp     | ga  | gw   |
|------|--------|-----|------|
| val: | 0.728  | -7  | 6.92 |
| sd:  | 0.0416 | 289 | 1860 |

GAIN-LOSS MODEL (in blue):

|      | tp    | ga    | gw   | la | lw |
|------|-------|-------|------|----|----|
| val: | 0.728 | -6.94 | 7.78 | 4  | 18 |
| sd:  | NA    | NA    | NA   | NA | NA |

|       | CNST  | HILL | GNLS  |
|-------|-------|------|-------|
| AIC:  | 93.79 | 9.97 | 13.97 |
| PROB: | 0     | 0.88 | 0.12  |
| RMSE: | 0.78  | 0.24 | 0.24  |

MAX\_MEAN: 0.925 MAX\_MED: 0.968 BMAD: 0.258

COFF: 0.774 HIT-CALL: 0 FITC: 20 ACTP: 1

FLAGS: 8; 12

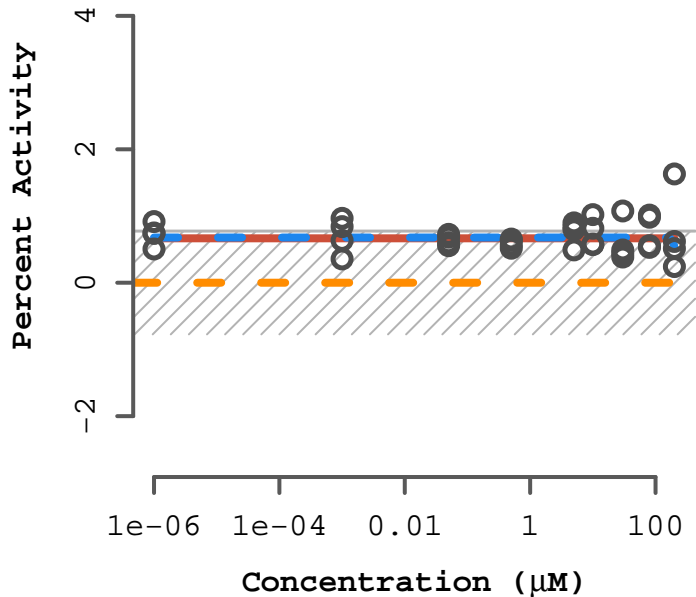

ASSAY: AEID3096 (CCTE\_Deisenroth\_DEVTOX\_RUES2-GLR\_Bra\_

NAME: Valproic acid

CHID: 23733 CASRN: 99-66-1

SPID(S): ES211\_63\_63

M4ID: 42676056

HILL MODEL (in red):

|      | tp     | ga  | gw   |
|------|--------|-----|------|
| val: | 0.666  | -7  | 7.4  |
| sd:  | 0.0382 | 225 | 1420 |

GAIN-LOSS MODEL (in blue):

|      | tp     | ga    | gw   | la     | lw   |
|------|--------|-------|------|--------|------|
| val: | 0.678  | -6.99 | 8    | 2.34   | 15.9 |
| sd:  | 0.0392 | 465   | 2120 | 0.0417 | 19.6 |

|       | CNST  | HILL | GNLS  |
|-------|-------|------|-------|
| AIC:  | 89.32 | 8.3  | 11.01 |
| PROB: | 0     | 0.8  | 0.2   |
| RMSE: | 0.74  | 0.26 | 0.27  |

MAX\_MEAN: 0.771 MAX\_MED: 0.815 BMAD: 0.258

COFF: 0.774 HIT-CALL: 0 FITC: 20 ACTP: 1

FLAGS: 12

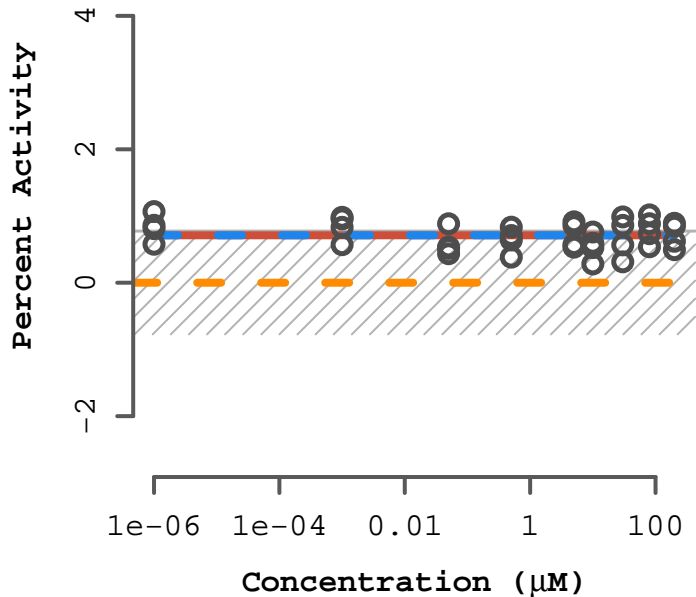

ASSAY: AEID3096 (CCTE\_Deisenroth\_DEVTOX\_RUES2-GLR\_Bra\_

NAME: Salicylic acid

CHID: 26368 CASRN: 69-72-7

SPID(S): ES211\_55\_55

M4ID: 42676043

HILL MODEL (in red):

|      | tp     | ga  | gw   |
|------|--------|-----|------|
| val: | 0.711  | -7  | 7.39 |
| sd:  | 0.0386 | 173 | 1090 |

GAIN-LOSS MODEL (in blue):

|      | tp     | ga  | gw   | la   | lw   |
|------|--------|-----|------|------|------|
| val: | 0.711  | -7  | 7.23 | 3.96 | 4.33 |
| sd:  | 0.0386 | 156 | 1010 | 1440 | 3590 |

|       | CNST  | HILL | GNLS |
|-------|-------|------|------|
| AIC:  | 89.56 | 1.52 | 5.52 |
| PROB: | 0     | 0.88 | 0.12 |
| RMSE: | 0.73  | 0.21 | 0.21 |

MAX\_MEAN: 0.835 MAX\_MED: 0.894 BMAD: 0.258

COFF: 0.774 HIT-CALL: 0 FITC: 20 ACTP: 1

FLAGS: 8; 12



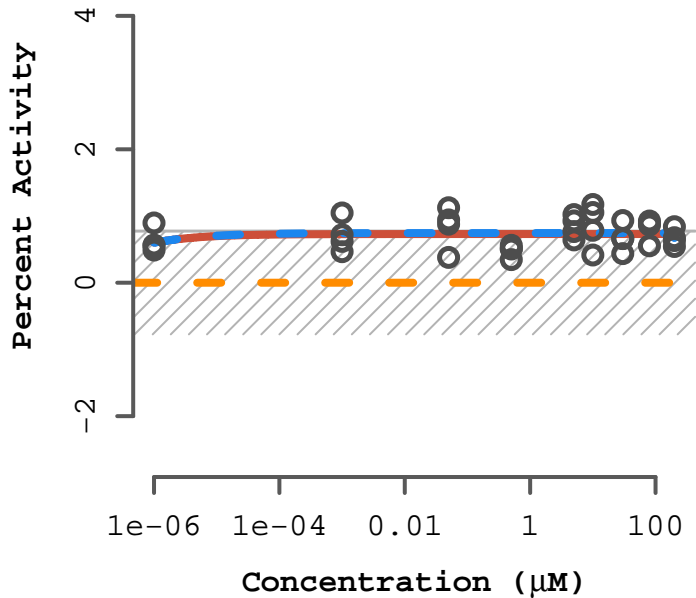

ASSAY: AEID3096 (CCTE\_Deisenroth\_DEVTOX\_RUES2-GLR\_Bra\_

NAME: Penicillin G potassium

CHID: 45106 CASRN: 113-98-4

SPID(S): ES211\_49\_49

M4ID: 42676074

HILL MODEL (in red):

|      |      |     |       |
|------|------|-----|-------|
|      | tp   | ga  | gw    |
| val: | 0.73 | -7  | 0.674 |
| sd:  | NaN  | NaN | NaN   |

GAIN-LOSS MODEL (in blue):

|      |       |       |       |      |     |
|------|-------|-------|-------|------|-----|
|      | tp    | ga    | gw    | la   | lw  |
| val: | 0.745 | -6.99 | 0.627 | 2.35 | 18  |
| sd:  | NaN   | NaN   | NaN   | NaN  | NaN |

|       |       |      |      |
|-------|-------|------|------|
|       | CNST  | HILL | GNLS |
| AIC:  | 91.42 | 5.9  | 9.42 |
| PROB: | 0     | 0.85 | 0.15 |
| RMSE: | 0.76  | 0.22 | 0.22 |

MAX\_MEAN: 0.857 MAX\_MED: 0.92 BMAD: 0.258

COFF: 0.774 HIT-CALL: 0 FITC: 20 ACTP: 1

FLAGS: 8; 12

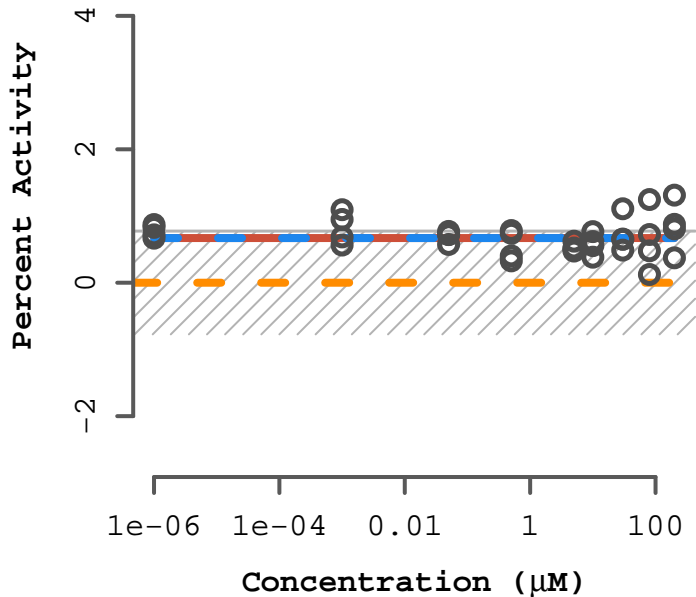

ASSAY: AEID3096 (CCTE\_Deisenroth\_DEVTOX\_RUES2-GLR\_Bra\_

NAME: Lenalidomide

CHID: 46664 CASRN: 191732-72-6

SPID(S): ES211\_41\_41

M4ID: 42676064

HILL MODEL (in red):

|      | tp     | ga  | gw   |
|------|--------|-----|------|
| val: | 0.67   | -7  | 7.49 |
| sd:  | 0.0378 | 181 | 1120 |

GAIN-LOSS MODEL (in blue):

|      | tp   | ga  | gw   | la   | lw  |
|------|------|-----|------|------|-----|
| val: | 0.67 | -7  | 7.53 | 2.94 | 18  |
| sd:  | NaN  | NaN | NaN  | NaN  | NaN |

|       | CNST  | HILL | GNLS  |
|-------|-------|------|-------|
| AIC:  | 88.38 | 9.24 | 13.24 |
| PROB: | 0     | 0.88 | 0.12  |
| RMSE: | 0.73  | 0.25 | 0.25  |

MAX\_MEAN: 0.843 MAX\_MED: 0.842 BMAD: 0.258

COFF: 0.774 HIT-CALL: 0 FITC: 20 ACTP: 1

FLAGS: 8; 12

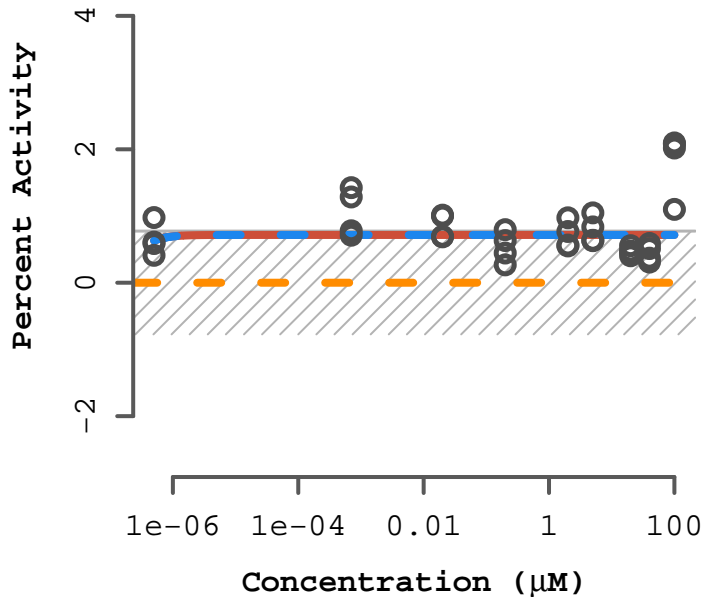

ASSAY: AEID3096 (CCTE\_Deisenroth\_DEVTOX\_RUES2-GLR\_Bra\_

NAME: Ketanserin tartrate

CHID: 1003945 CASRN: 83846-83-7

SPID(S): ES211\_40\_40

M4ID: 42676085

HILL MODEL (in red):

|      | tp    | ga    | gw   |
|------|-------|-------|------|
| val: | 0.716 | -6.71 | 2.15 |
| sd:  | NaN   | NaN   | NaN  |

GAIN-LOSS MODEL (in blue):

|      | tp    | ga    | gw   | la   | lw  |
|------|-------|-------|------|------|-----|
| val: | 0.716 | -6.74 | 1.99 | 2.98 | 11  |
| sd:  | NaN   | NaN   | NaN  | NaN  | NaN |

|       | CNST   | HILL  | GNLS  |
|-------|--------|-------|-------|
| AIC:  | 102.66 | 46.32 | 50.32 |
| PROB: | 0      | 0.88  | 0.12  |
| RMSE: | 0.93   | 0.47  | 0.47  |

MAX\_MEAN: 1.82      MAX\_MED: 2.05      BMAD: 0.258

COFF: 0.774    HIT-CALL: 0    FITC: 20    ACTP: 1

FLAGS: 8; 12

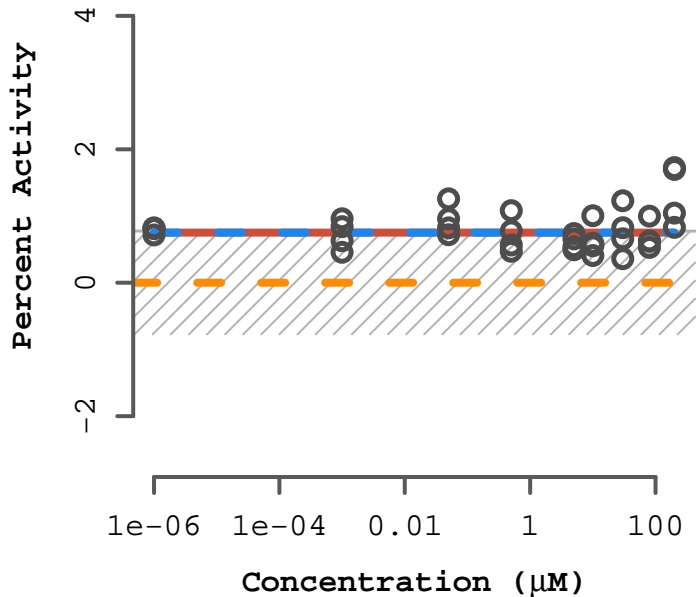

ASSAY: AEID3096 (CCTE\_Deisenroth\_DEVTOX\_RUES2-GLR\_Bra\_

NAME: (2R,3S)-2-(3,4-Dihydroxyphenyl)-3,4-dihydro-2H-

CHID: 1017388 CASRN: 225937-10-0

SPID(S): ES211\_22\_22

M4ID: 42676068

HILL MODEL (in red):

|      |        |     |      |
|------|--------|-----|------|
|      | tp     | ga  | gw   |
| val: | 0.751  | -7  | 6.94 |
| sd:  | 0.0442 | 197 | 1270 |

GAIN-LOSS MODEL (in blue):

|      |       |       |      |      |      |
|------|-------|-------|------|------|------|
|      | tp    | ga    | gw   | la   | lw   |
| val: | 0.751 | -6.96 | 7.95 | 4.29 | 16.6 |
| sd:  | NA    | NA    | NA   | NA   | NA   |

|       |       |       |       |
|-------|-------|-------|-------|
|       | CNST  | HILL  | GNLS  |
| AIC:  | 99.44 | 21.58 | 25.58 |
| PROB: | 0     | 0.88  | 0.12  |
| RMSE: | 0.86  | 0.31  | 0.31  |

MAX\_MEAN: 1.32 MAX\_MED: 1.37 BMAD: 0.258

COFF: 0.774 HIT-CALL: 0 FITC: 20 ACTP: 1

FLAGS: 8; 12

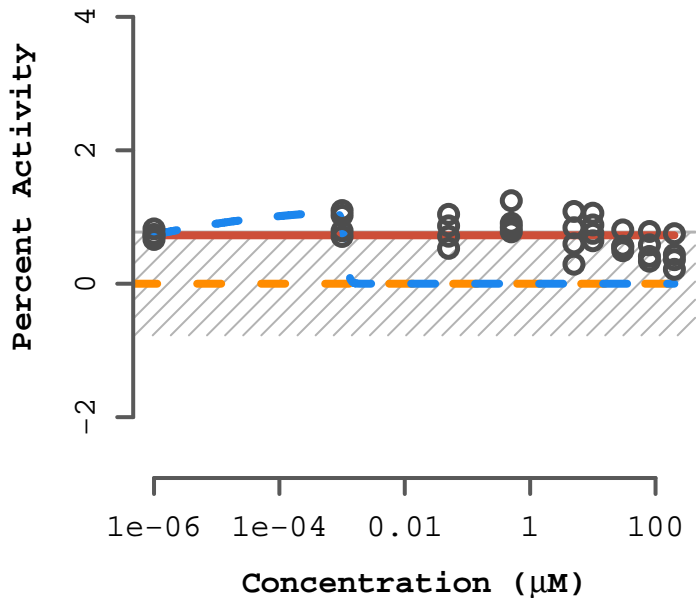

ASSAY: AEID3096 (CCTE\_Deisenroth\_DEVTOX\_RUES2-GLR\_Bra\_

NAME: 5,5-Diphenylhydantoin

CHID: 20541 CASRN: 57-41-0

SPID(S): ES211\_3\_3

M4ID: 42676082

HILL MODEL (in red):

|      | tp     | ga  | gw   |
|------|--------|-----|------|
| val: | 0.726  | -7  | 6.73 |
| sd:  | 0.0402 | 279 | 1740 |

GAIN-LOSS MODEL (in blue):

|      | tp   | ga   | gw    | la    | lw   |
|------|------|------|-------|-------|------|
| val: | 1.16 | -6.8 | 0.301 | -2.95 | 14.2 |
| sd:  | NaN  | NaN  | NaN   | NaN   | NaN  |

|       | CNST  | HILL | GNLS  |
|-------|-------|------|-------|
| AIC:  | 91.66 | 9.99 | 88.82 |
| PROB: | 0     | 1    | 0     |
| RMSE: | 0.76  | 0.24 | 0.65  |

MAX\_MEAN: 0.943 MAX\_MED: 0.909 BMAD: 0.258

COFF: 0.774 HIT-CALL: 0 FITC: 21 ACTP: 1

FLAGS: 8; 12

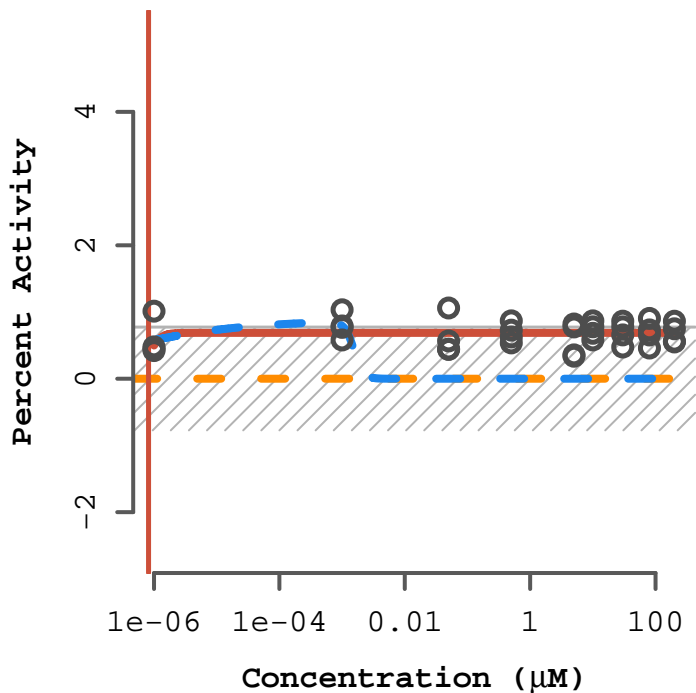

ASSAY: AEID3096 (CCTE\_Deisenroth\_DEVTOX\_RUES2-GLR\_Bra\_

NAME: Isoniazid

CHID: 20755 CASRN: 54-85-3

SPID(S): ES211\_39\_39

M4ID: 42676055

HILL MODEL (in red):

|      | tp    | ga     | gw   |
|------|-------|--------|------|
| val: | 0.687 | -6.09  | 4.82 |
| sd:  | 0.034 | 0.0838 | 4.77 |

GAIN-LOSS MODEL (in blue):

|      | tp    | ga    | gw   | la    | lw   |
|------|-------|-------|------|-------|------|
| val: | 0.876 | -6.69 | 0.42 | -2.81 | 5.98 |
| sd:  | NaN   | NaN   | NaN  | NaN   | NaN  |

|       | CNST  | HILL | GNLS  |
|-------|-------|------|-------|
| AIC:  | 86.11 | -7.4 | 86.08 |
| PROB: | 0     | 1    | 0     |
| RMSE: | 0.7   | 0.19 | 0.62  |

MAX\_MEAN: 0.794 MAX\_MED: 0.781 BMAD: 0.258

COFF: 0.774 HIT-CALL: 0 FITC: 21 ACTP: 1

FLAGS: 12

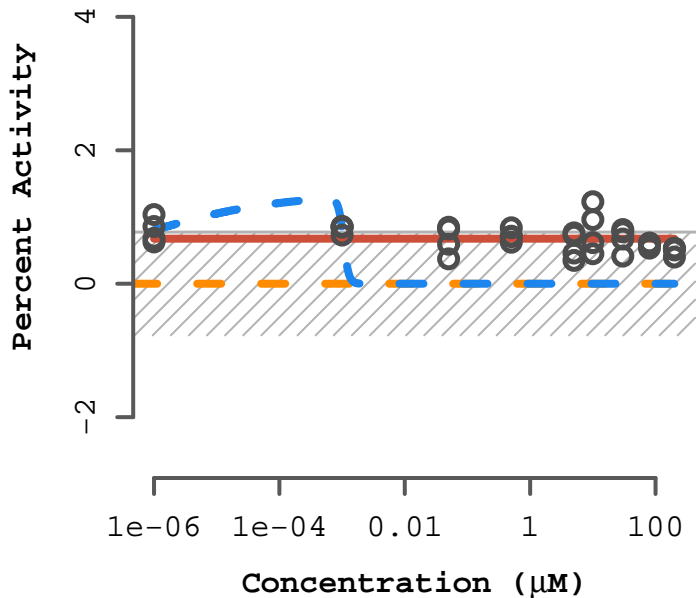

ASSAY: AEID3096 (CCTE\_Deisenroth\_DEVTOX\_RUES2-GLR\_Bra\_

NAME: Methyl dopa sesquihydrate

CHID: 20863 CASRN: 41372-08-1

SPID(S): ES211\_46\_46

M4ID: 42676079

HILL MODEL (in red):

|      | tp    | ga    | gw  |
|------|-------|-------|-----|
| val: | 0.675 | -6.98 | 7.4 |
| sd:  | 0.032 | 142   | 919 |

GAIN-LOSS MODEL (in blue):

|      | tp   | ga    | gw   | la    | lw   |
|------|------|-------|------|-------|------|
| val: | 1.36 | -6.42 | 0.38 | -2.98 | 10.5 |
| sd:  | NaN  | NaN   | NaN  | NaN   | NaN  |

|       | CNST  | HILL | GNLS  |
|-------|-------|------|-------|
| AIC:  | 86.93 | -7.1 | 82.87 |
| PROB: | 0     | 1    | 0     |
| RMSE: | 0.71  | 0.19 | 0.6   |

MAX\_MEAN: 0.823 MAX\_MED: 0.851 BMAD: 0.258

COFF: 0.774 HIT-CALL: 0 FITC: 21 ACTP: 1

FLAGS: 8; 12

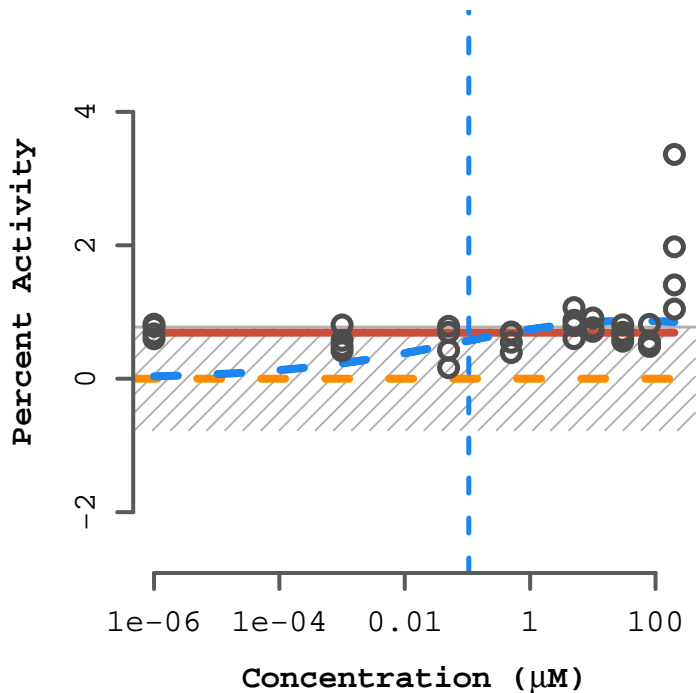

ASSAY: AEID3096 (CCTE\_Deisenroth\_DEVTOX\_RUES2-GLR\_Bra\_

NAME: MEHP

CHID: 25680 CASRN: 4376-20-9

SPID(S): ES211\_44\_44

M4ID: 42676069

HILL MODEL (in red):

|      | tp     | ga  | gw   |
|------|--------|-----|------|
| val: | 0.69   | -7  | 6.72 |
| sd:  | 0.0386 | 200 | 1270 |

GAIN-LOSS MODEL (in blue):

|      | tp   | ga     | gw  | la  | lw  |
|------|------|--------|-----|-----|-----|
| val: | 1.17 | -0.979 | 0.3 | 4.3 | 0.3 |
| sd:  | NaN  | NaN    | NaN | NaN | NaN |

|       | CNST   | HILL | GNLS  |
|-------|--------|------|-------|
| AIC:  | 100.53 | 29.4 | 57.24 |
| PROB: | 0      | 1    | 0     |
| RMSE: | 0.96   | 0.54 | 0.56  |

MAX\_MEAN: 1.95 MAX\_MED: 1.69 BMAD: 0.258

COFF: 0.774 HIT-CALL: 0 FITC: 21 ACTP: 1

FLAGS: 8; 12



Percent Activity

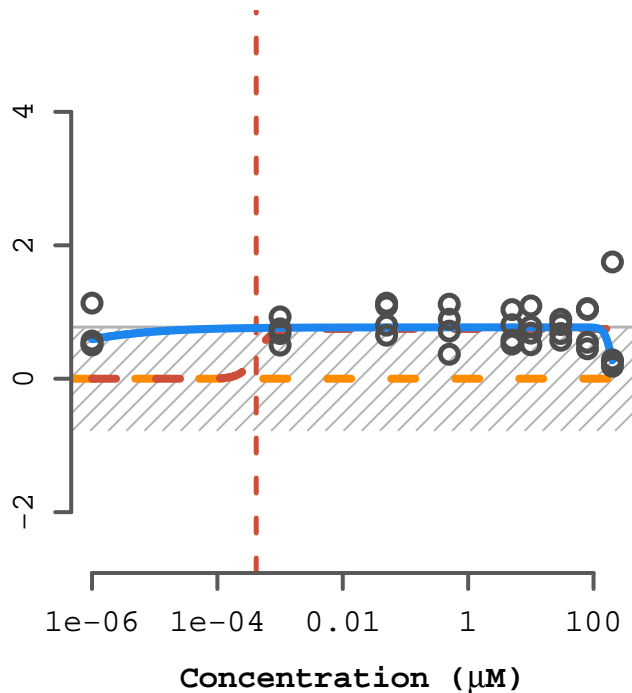

ASSAY: AEID3096 (CCTE\_Deisenroth\_DEVTOX\_RUES2-GLR\_Bra\_

NAME: Sulfasalazine

CHID: 21256 CASRN: 599-79-1

SPID(S): ES211\_59\_59

M4ID: 42676092

HILL MODEL (in red):

|      | tp     | ga    | gw   |
|------|--------|-------|------|
| val: | 0.746  | -3.38 | 3.55 |
| sd:  | 0.0651 | 17.4  | 162  |

GAIN-LOSS MODEL (in blue):

|      | tp     | ga   | gw    | la     | lw   |
|------|--------|------|-------|--------|------|
| val: | 0.77   | -7   | 0.522 | 2.27   | 8.42 |
| sd:  | 0.0571 | 4.75 | 2.66  | 0.0847 | 23.6 |

|       | CNST  | HILL  | GNLS  |
|-------|-------|-------|-------|
| AIC:  | 95.11 | 40.09 | 20.18 |
| PROB: | 0     | 0     | 1     |
| RMSE: | 0.81  | 0.38  | 0.33  |

MAX\_MEAN: 0.92 MAX\_MED: 0.948 BMAD: 0.258

COFF: 0.774 HIT-CALL: 0 FITC: 31 ACTP: 1

FLAGS: 8; 12

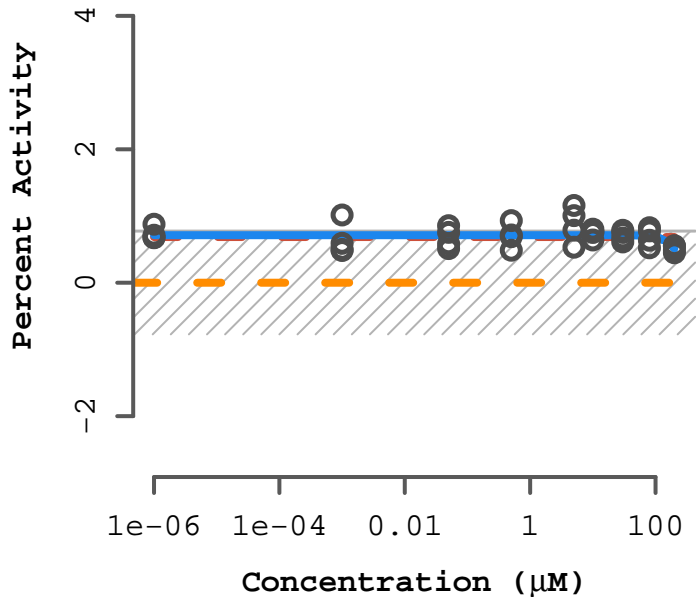

ASSAY: AEID3096 (CCTE\_Deisenroth\_DEVTOX\_RUES2-GLR\_Bra\_

NAME: Cyclophosphamide monohydrate

CHID: 24888 CASRN: 6055-19-2

SPID(S): ES211\_24\_24

M4ID: 42676086

HILL MODEL (in red):

|      | tp     | ga  | gw   |
|------|--------|-----|------|
| val: | 0.685  | -7  | 7.93 |
| sd:  | 0.0278 | 327 | 1600 |

GAIN-LOSS MODEL (in blue):

|      | tp     | ga  | gw   | la    | lw   |
|------|--------|-----|------|-------|------|
| val: | 0.712  | -7  | 7.02 | 2.43  | 3.18 |
| sd:  | 0.0288 | 197 | 1250 | 0.233 | 5.76 |

|       | CNST  | HILL   | GNLS   |
|-------|-------|--------|--------|
| AIC:  | 88.09 | -17.34 | -21.37 |
| PROB: | 0     | 0.12   | 0.88   |
| RMSE: | 0.72  | 0.17   | 0.15   |

MAX\_MEAN: 0.871 MAX\_MED: 0.897 BMAD: 0.258

COFF: 0.774 HIT-CALL: 0 FITC: 31 ACTP: 1

FLAGS: 12

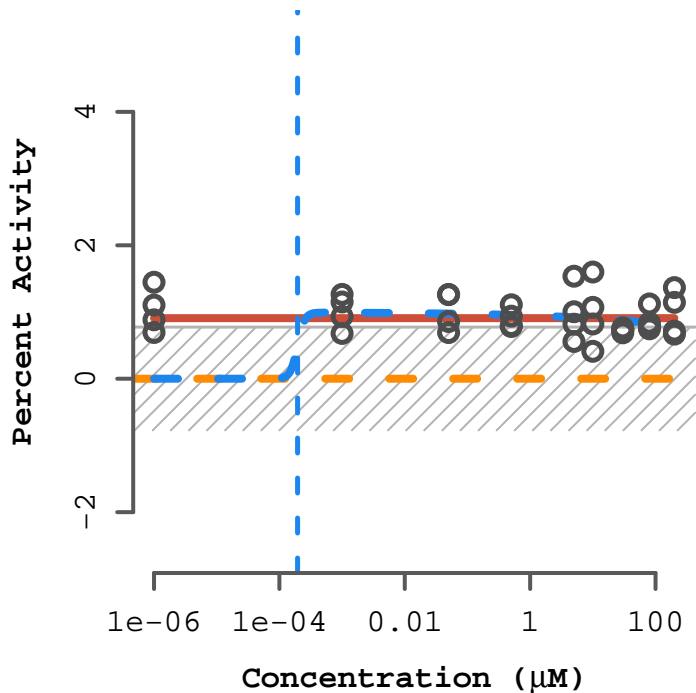

ASSAY: AEID3096 (CCTE\_Deisenroth\_DEVTOX\_RUES2-GLR\_Bra\_

NAME: Acrylamide

CHID: 20027 CASRN: 79-06-1

SPID(S): ES211\_10\_10

M4ID: 42676052

HILL MODEL (in red):

|      | tp     | ga    | gw   |
|------|--------|-------|------|
| val: | 0.908  | -6.98 | 7.28 |
| sd:  | 0.0478 | 188   | 1230 |

GAIN-LOSS MODEL (in blue):

|      | tp    | ga    | gw   | la   | lw    |
|------|-------|-------|------|------|-------|
| val: | 0.996 | -3.71 | 7.71 | 4.3  | 0.3   |
| sd:  | 0.236 | 76.3  | 829  | 2.88 | 0.634 |

|       | CNST   | HILL  | GNLS  |
|-------|--------|-------|-------|
| AIC:  | 110.38 | 20.93 | 49.77 |
| PROB: | 0      | 1     | 0     |
| RMSE: | 0.98   | 0.28  | 0.44  |

MAX\_MEAN: 1.03 MAX\_MED: 1.06 BMAD: 0.258

COFF: 0.774 HIT-CALL: 1 FITC: 36 ACTP: 1

FLAGS: 11; 18

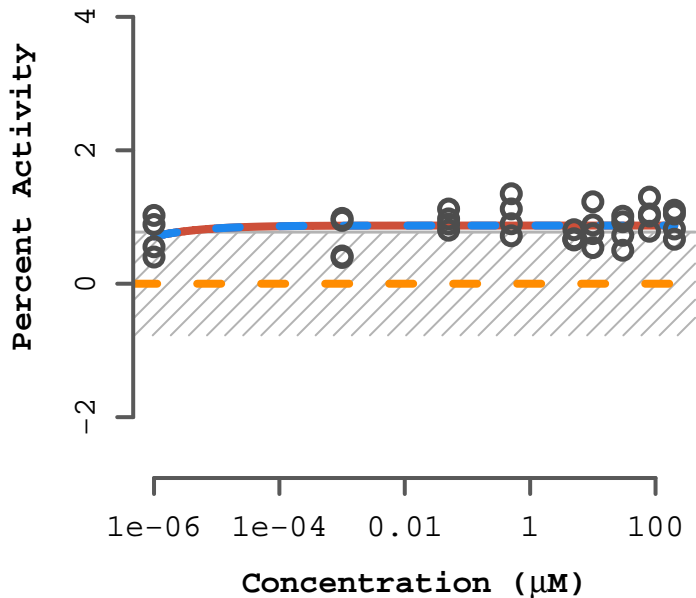

ASSAY: AEID3096 (CCTE\_Deisenroth\_DEVTOX\_RUES2-GLR\_Bra\_

NAME: Aspirin

CHID: 20108 CASRN: 50-78-2

SPID(S): ES211\_15\_15

M4ID: 42676063

HILL MODEL (in red):

|      |       |     |       |
|------|-------|-----|-------|
|      | tp    | ga  | gw    |
| val: | 0.872 | -7  | 0.644 |
| sd:  | NaN   | NaN | NaN   |

GAIN-LOSS MODEL (in blue):

|      |       |     |       |      |     |
|------|-------|-----|-------|------|-----|
|      | tp    | ga  | gw    | la   | lw  |
| val: | 0.872 | -7  | 0.644 | 4.16 | 6.4 |
| sd:  | NaN   | NaN | NaN   | NaN  | NaN |

|       |        |      |      |
|-------|--------|------|------|
|       | CNST   | HILL | GNLS |
| AIC:  | 102.99 | 10.1 | 14.1 |
| PROB: | 0      | 0.88 | 0.12 |
| RMSE: | 0.89   | 0.24 | 0.24 |

MAX\_MEAN: 1.04 MAX\_MED: 1.03 BMAD: 0.258

COFF: 0.774 HIT-CALL: 1 FITC: 36 ACTP: 1

FLAGS: 11; 18

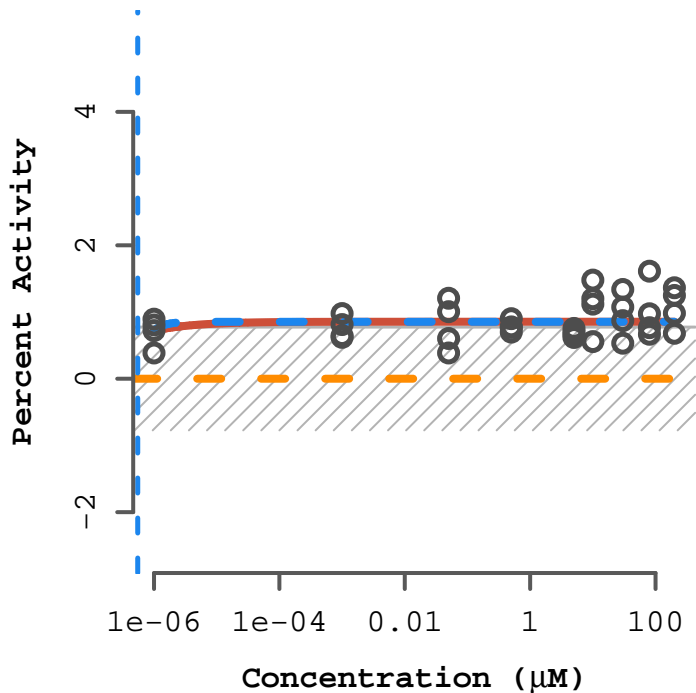

ASSAY: AEID3096 (CCTE\_Deisenroth\_DEVTOX\_RUES2-GLR\_Bra\_

NAME: Caffeine

CHID: 20232 CASRN: 58-08-2

SPID(S): ES211\_20\_20

M4ID: 42676076

HILL MODEL (in red):

|            |     |       |
|------------|-----|-------|
| tp         | ga  | gw    |
| val: 0.854 | -7  | 0.738 |
| sd: NaN    | NaN | NaN   |

GAIN-LOSS MODEL (in blue):

|            |       |     |      |      |
|------------|-------|-----|------|------|
| tp         | ga    | gw  | la   | lw   |
| val: 0.853 | -6.26 | 2.9 | 3.94 | 9.69 |
| sd: NA     | NA    | NA  | NA   | NA   |

|            |       |       |
|------------|-------|-------|
| CNST       | HILL  | GNLS  |
| AIC: 105.2 | 22.44 | 26.45 |
| PROB: 0    | 0.88  | 0.12  |
| RMSE: 0.92 | 0.29  | 0.29  |

MAX\_MEAN: 1.09 MAX\_MED: 1.16 BMAD: 0.258

COFF: 0.774 HIT-CALL: 1 FITC: 36 ACTP: 1

FLAGS: 11; 18

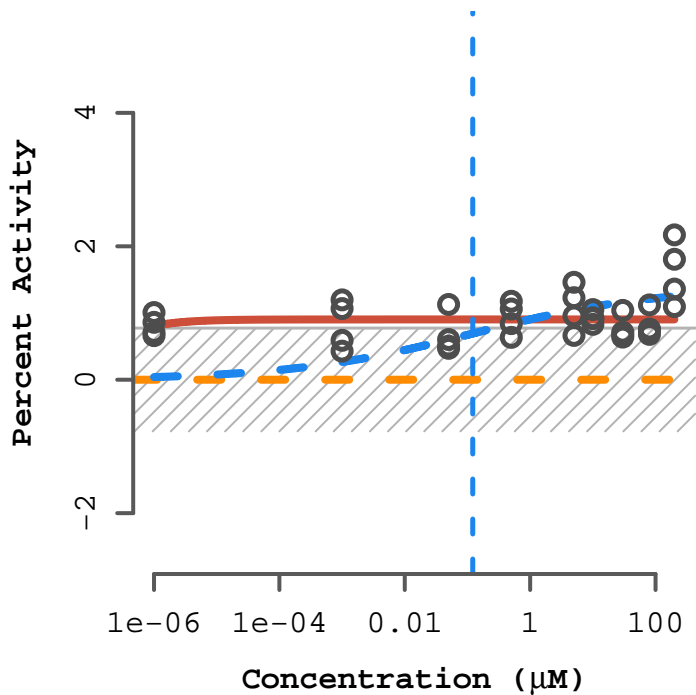

ASSAY: AEID3096 (CCTE\_Deisenroth\_DEVTOX\_RUES2-GLR\_Bra\_

NAME: Diphenhydramine hydrochloride

CHID: 20537 CASRN: 147-24-0

SPID(S): ES211\_31\_31

M4ID: 42676100

HILL MODEL (in red):

|      |       |     |       |
|------|-------|-----|-------|
|      | tp    | ga  | gw    |
| val: | 0.904 | -7  | 0.918 |
| sd:  | NaN   | NaN | NaN   |

GAIN-LOSS MODEL (in blue):

|      |      |        |     |      |      |
|------|------|--------|-----|------|------|
|      | tp   | ga     | gw  | la   | lw   |
| val: | 1.39 | -0.916 | 0.3 | 3.19 | 9.75 |
| sd:  | NaN  | NaN    | NaN | NaN  | NaN  |

|       |        |       |       |
|-------|--------|-------|-------|
|       | CNST   | HILL  | GNLS  |
| AIC:  | 110.79 | 32.07 | 61.58 |
| PROB: | 0      | 1     | 0     |
| RMSE: | 1.01   | 0.36  | 0.46  |

MAX\_MEAN: 1.61 MAX\_MED: 1.58 BMAD: 0.258

COFF: 0.774 HIT-CALL: 1 FITC: 36 ACTP: 1

FLAGS: 11; 18

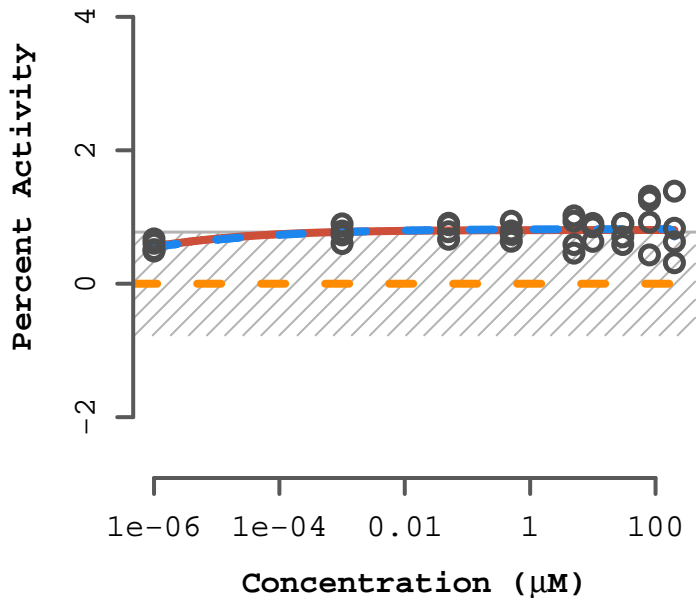

ASSAY: AEID3096 (CCTE\_Deisenroth\_DEVTOX\_RUES2-GLR\_Bra\_

NAME: Acyclovir

CHID: 22556 CASRN: 59277-89-3

SPID(S): ES211\_12\_12

M4ID: 42676054

HILL MODEL (in red):

|      | tp    | ga   | gw    |
|------|-------|------|-------|
| val: | 0.806 | -7   | 0.356 |
| sd:  | 0.055 | 1.53 | 0.602 |

GAIN-LOSS MODEL (in blue):

|      | tp   | ga  | gw    | la   | lw   |
|------|------|-----|-------|------|------|
| val: | 0.82 | -7  | 0.307 | 2.35 | 17.9 |
| sd:  | NaN  | NaN | NaN   | NaN  | NaN  |

|       | CNST  | HILL  | GNLS |
|-------|-------|-------|------|
| AIC:  | 96.69 | -1.33 | 2.02 |
| PROB: | 0     | 0.84  | 0.16 |
| RMSE: | 0.81  | 0.22  | 0.22 |

MAX\_MEAN: 0.981 MAX\_MED: 1.09 BMAD: 0.258

COFF: 0.774 HIT-CALL: 1 FITC: 36 ACTP: 1

FLAGS: 11; 18

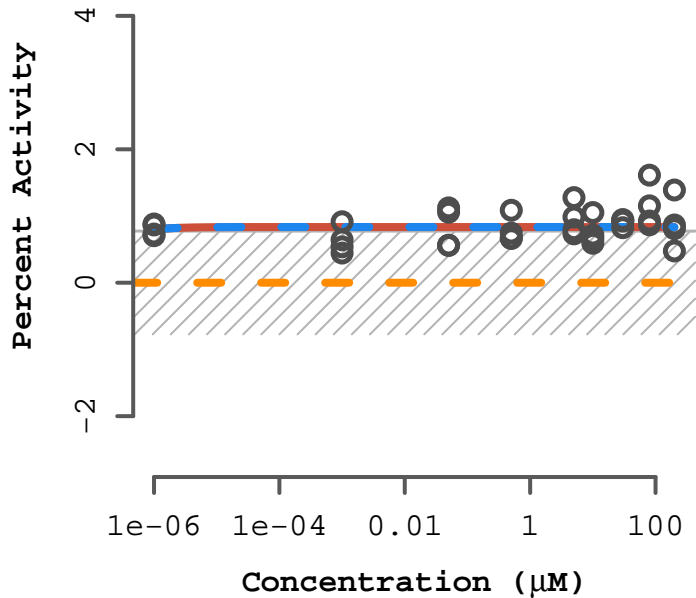

ASSAY: AEID3096 (CCTE\_Deisenroth\_DEVTOX\_RUES2-GLR\_Bra\_

NAME: Carbamazepine

CHID: 22731 CASRN: 298-46-4

SPID(S): ES211\_21\_21

M4ID: 42676095

HILL MODEL (in red):

|      | tp    | ga  | gw   |
|------|-------|-----|------|
| val: | 0.835 | -7  | 1.31 |
| sd:  | NaN   | NaN | NaN  |

GAIN-LOSS MODEL (in blue):

|      | tp    | ga  | gw  | la  | lw  |
|------|-------|-----|-----|-----|-----|
| val: | 0.835 | -7  | 1.3 | 2.5 | 13  |
| sd:  | NaN   | NaN | NaN | NaN | NaN |

|       | CNST   | HILL  | GNLS  |
|-------|--------|-------|-------|
| AIC:  | 103.09 | 10.08 | 14.08 |
| PROB: | 0      | 0.88  | 0.12  |
| RMSE: | 0.89   | 0.25  | 0.25  |

MAX\_MEAN: 1.14 MAX\_MED: 1.04 BMAD: 0.258

COFF: 0.774 HIT-CALL: 1 FITC: 36 ACTP: 1

FLAGS: 11; 18



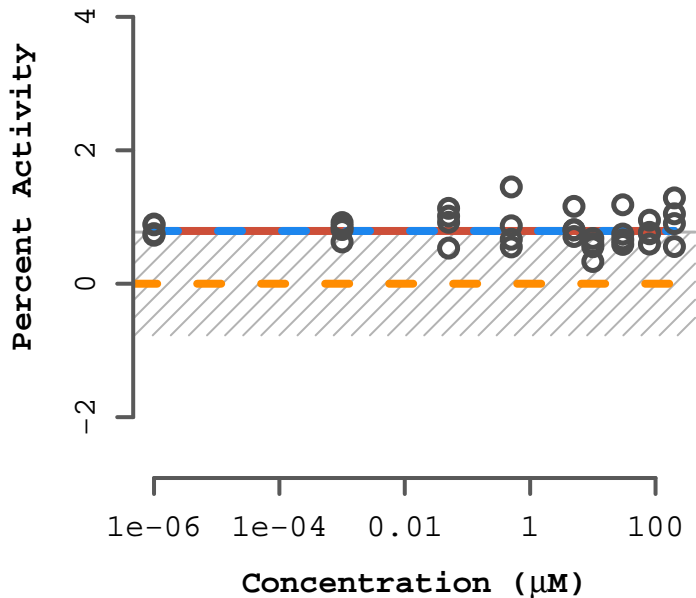

ASSAY: AEID3096 (CCTE\_Deisenroth\_DEVTOX\_RUES2-GLR\_Bra\_

NAME: Warfarin

CHID: 23742 CASRN: 81-81-2

SPID(S): ES211\_65\_65

M4ID: 42676078

HILL MODEL (in red):

|      |        |     |      |
|------|--------|-----|------|
|      | tp     | ga  | gw   |
| val: | 0.791  | -7  | 6.87 |
| sd:  | 0.0368 | 201 | 1280 |

GAIN-LOSS MODEL (in blue):

|      |        |     |      |      |      |
|------|--------|-----|------|------|------|
|      | tp     | ga  | gw   | la   | lw   |
| val: | 0.791  | -7  | 7.05 | 4.29 | 4.08 |
| sd:  | 0.0368 | 227 | 1450 | 1320 | 2710 |

|       |       |      |      |
|-------|-------|------|------|
|       | CNST  | HILL | GNLS |
| AIC:  | 99.59 | 5.22 | 9.22 |
| PROB: | 0     | 0.88 | 0.12 |
| RMSE: | 0.85  | 0.23 | 0.23 |

MAX\_MEAN: 0.949 MAX\_MED: 0.975 BMAD: 0.258

COFF: 0.774 HIT-CALL: 1 FITC: 36 ACTP: 1

FLAGS: 11; 18

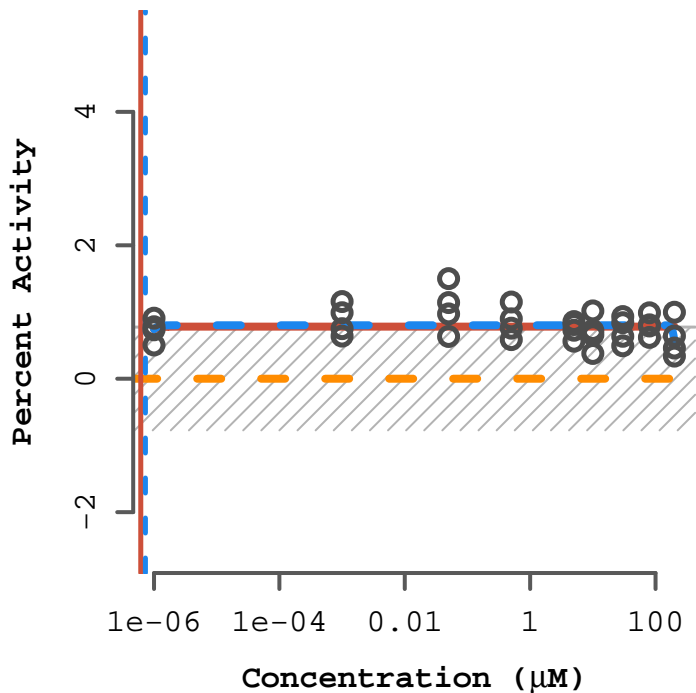

ASSAY: AEID3096 (CCTE\_Deisenroth\_DEVTOX\_RUES2-GLR\_Bra\_

NAME: Stavudine

CHID: 23819 CASRN: 3056-17-5

SPID(S): ES211\_58\_58

M4ID: 42676047

HILL MODEL (in red):

|      | tp    | ga    | gw   |
|------|-------|-------|------|
| val: | 0.781 | -6.21 | 6.01 |
| sd:  | NaN   | NaN   | NaN  |

GAIN-LOSS MODEL (in blue):

|      | tp    | ga    | gw  | la   | lw  |
|------|-------|-------|-----|------|-----|
| val: | 0.801 | -6.14 | 8   | 2.32 | 18  |
| sd:  | NaN   | NaN   | NaN | NaN  | NaN |

|       | CNST  | HILL | GNLS |
|-------|-------|------|------|
| AIC:  | 97.56 | 7.33 | 8.28 |
| PROB: | 0     | 0.62 | 0.38 |
| RMSE: | 0.82  | 0.24 | 0.23 |

MAX\_MEAN: 1.06 MAX\_MED: 1.06 BMAD: 0.258

COFF: 0.774 HIT-CALL: 1 FITC: 36 ACTP: 1

FLAGS: 11; 18

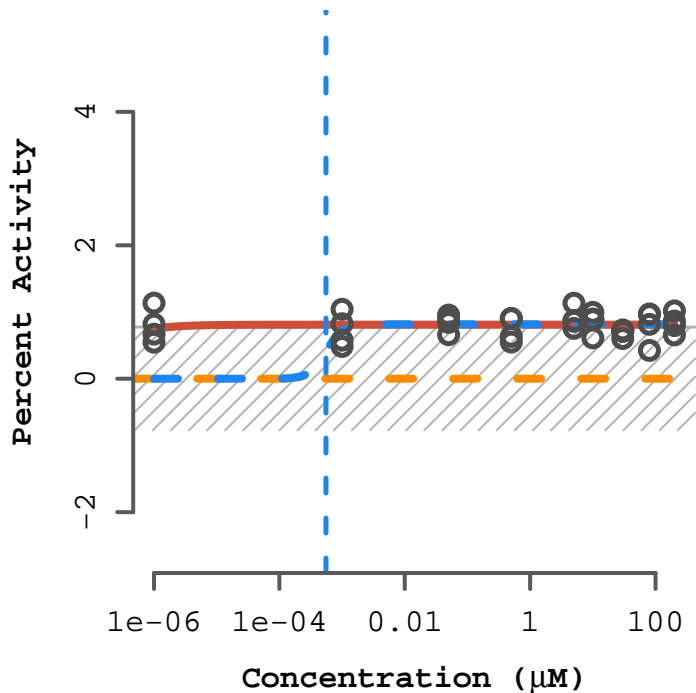

ASSAY: AEID3096 (CCTE\_Deisenroth\_DEVTOX\_RUES2-GLR\_Bra\_

NAME: D-Camphor

CHID: 24721 CASRN: 464-49-3

SPID(S): ES211\_27\_27

M4ID: 42676088

HILL MODEL (in red):

|      | tp   | ga  | gw   |
|------|------|-----|------|
| val: | 0.81 | -7  | 1.08 |
| sd:  | NaN  | NaN | NaN  |

GAIN-LOSS MODEL (in blue):

|      | tp     | ga    | gw   | la   | lw   |
|------|--------|-------|------|------|------|
| val: | 0.815  | -3.26 | 3.35 | 3.7  | 5.41 |
| sd:  | 0.0399 | 8.09  | 105  | 1170 | 4540 |

|       | CNST  | HILL   | GNLS  |
|-------|-------|--------|-------|
| AIC:  | 97.63 | -11.84 | 21.48 |
| PROB: | 0     | 1      | 0     |
| RMSE: | 0.82  | 0.18   | 0.32  |

MAX\_MEAN: 0.906 MAX\_MED: 0.891 BMAD: 0.258

COFF: 0.774 HIT-CALL: 1 FITC: 36 ACTP: 1

FLAGS: 11; 18

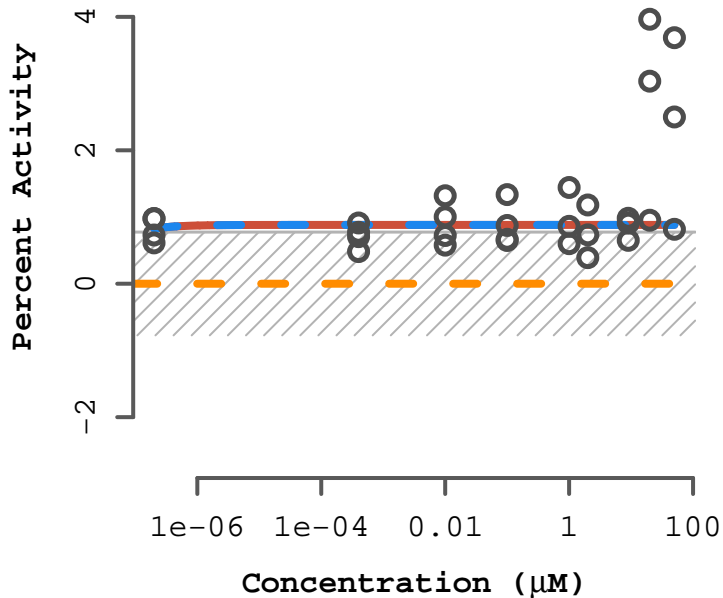

ASSAY: AEID3096 (CCTE\_Deisenroth\_DEVTOX\_RUES2-GLR\_Bra\_

NAME: Ritanserin

CHID: 42594 CASRN: 87051-43-2

SPID(S): ES211\_53\_53

M4ID: 42676107

HILL MODEL (in red):

|      |       |      |      |
|------|-------|------|------|
|      | tp    | ga   | gw   |
| val: | 0.881 | -7.7 | 1.17 |
| sd:  | NaN   | NaN  | NaN  |

GAIN-LOSS MODEL (in blue):

|      |       |      |      |      |      |
|------|-------|------|------|------|------|
|      | tp    | ga   | gw   | la   | lw   |
| val: | 0.881 | -7.7 | 1.17 | 3.31 | 4.98 |
| sd:  | NaN   | NaN  | NaN  | NaN  | NaN  |

|       |        |       |       |
|-------|--------|-------|-------|
|       | CNST   | HILL  | GNLS  |
| AIC:  | 111.82 | 69.44 | 73.44 |
| PROB: | 0      | 0.88  | 0.12  |
| RMSE: | 1.46   | 0.92  | 0.92  |

MAX\_MEAN: 2.65 MAX\_MED: 3.04 BMAD: 0.258

COFF: 0.774 HIT-CALL: 1 FITC: 36 ACTP: 1

FLAGS: 10; 11; 18

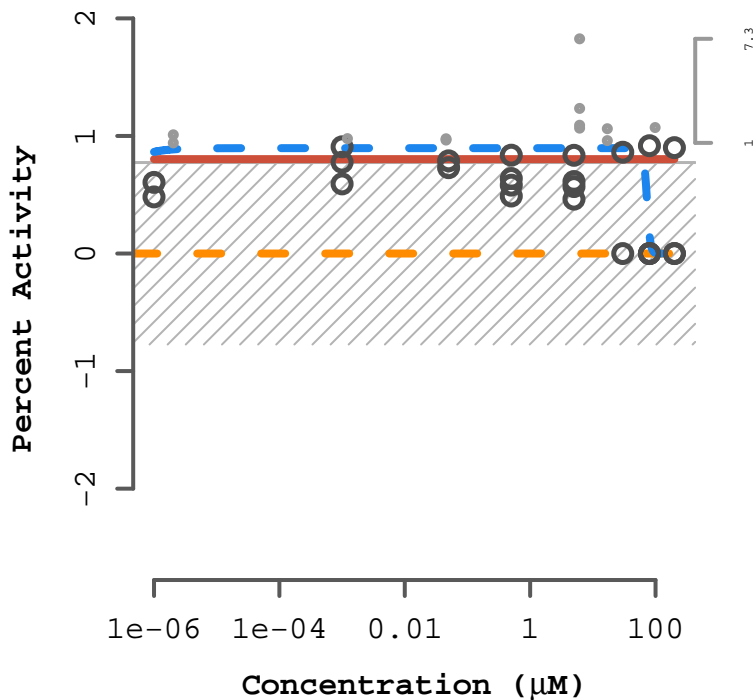

ASSAY: AEID3096 (CCTE\_Deisenroth\_DEVTOX\_RUES2-GLR\_Bra\_

NAME: Tegaserod maleate

CHID: 904761 CASRN: 189188-57-6

SPID(S): ES211\_61\_61

M4ID: 42676045 BRK

HILL MODEL (in red):

|      | tp    | ga  | gw   |
|------|-------|-----|------|
| val: | 0.803 | -7  | 6.11 |
| sd:  | 0.106 | 238 | 1420 |

GAIN-LOSS MODEL (in blue):

|      | tp    | ga    | gw   | la   | lw   |
|------|-------|-------|------|------|------|
| val: | 0.896 | -6.89 | 1.61 | 1.86 | 16.7 |
| sd:  | NaN   | NaN   | NaN  | NaN  | NaN  |

|       | CNST   | HILL  | GNLS  |
|-------|--------|-------|-------|
| AIC:  | 125.37 | 95.67 | 95.96 |
| PROB: | 0      | 0.54  | 0.46  |
| RMSE: | 1.63   | 1.27  | 1.25  |

MAX\_MEAN: 3.57 MAX\_MED: 2.57 BMAD: 0.258

COFF: 0.774 HIT-CALL: 1 FITC: 36 ACTP: 1

FLAGS: 10; 11; 18

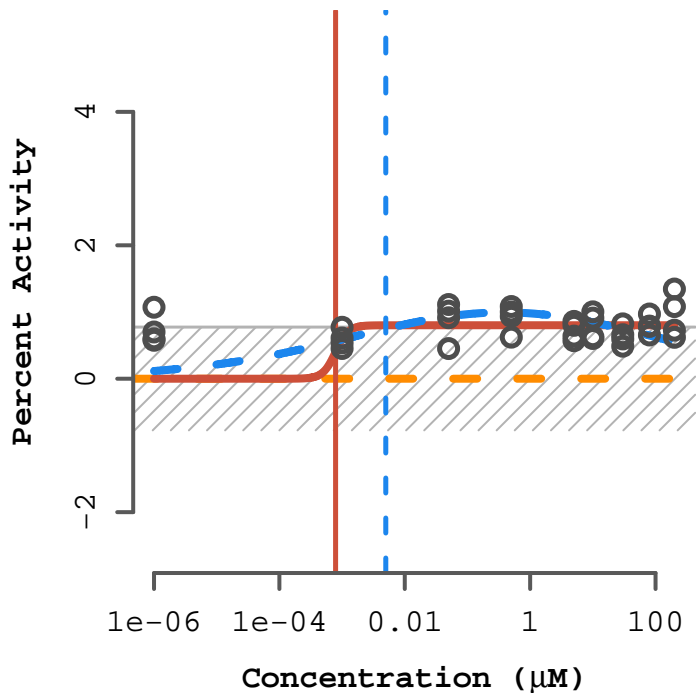

ASSAY: AEID3096 (CCTE\_Deisenroth\_DEVTOX\_RUES2-GLR\_Bra\_

NAME: 6-Propyl-2-thiouracil

CHID: 21209 CASRN: 51-52-5

SPID(S): ES211\_8\_8

M4ID: 42676073

HILL MODEL (in red):

|      | tp     | ga   | gw   |
|------|--------|------|------|
| val: | 0.801  | -3.1 | 4.3  |
| sd:  | 0.0489 | 1.81 | 75.3 |

GAIN-LOSS MODEL (in blue):

|      | tp   | ga   | gw  | la   | lw  |
|------|------|------|-----|------|-----|
| val: | 1.61 | -2.3 | 0.3 | 1.47 | 0.3 |
| sd:  | NaN  | NaN  | NaN | NaN  | NaN |

|       | CNST  | HILL  | GNLS  |
|-------|-------|-------|-------|
| AIC:  | 96.29 | 23.62 | 29.15 |
| PROB: | 0     | 0.94  | 0.06  |
| RMSE: | 0.81  | 0.32  | 0.32  |

MAX\_MEAN: 0.944 MAX\_MED: 0.969 BMAD: 0.258

COFF: 0.774 HIT-CALL: 1 FITC: 37 ACTP: 1

FLAGS: 11

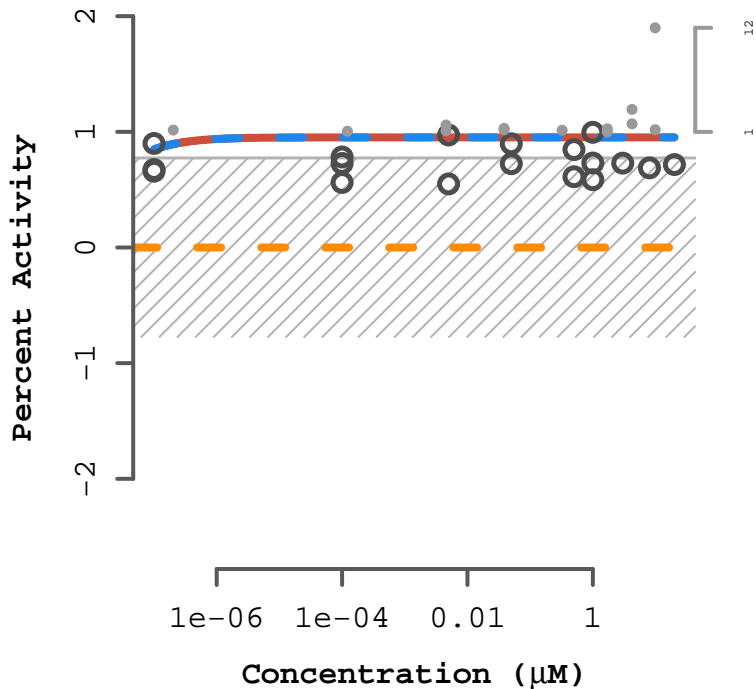

ASSAY: AEID3096 (CCTE\_Deisenroth\_DEVTOX\_RUES2-GLR\_Bra\_

NAME: Cyclopamine

CHID: 43709 CASRN: 4449-51-8

SPID(S): ES211\_23\_23

M4ID: 42676072 BRK

HILL MODEL (in red):

|      |       |     |      |
|------|-------|-----|------|
|      | tp    | ga  | gw   |
| val: | 0.952 | -8  | 0.91 |
| sd:  | NaN   | NaN | NaN  |

GAIN-LOSS MODEL (in blue):

|      |       |    |      |      |      |
|------|-------|----|------|------|------|
|      | tp    | ga | gw   | la   | lw   |
| val: | 0.952 | -8 | 0.91 | 3.22 | 17.9 |
| sd:  | NA    | NA | NA   | NA   | NA   |

|       |        |       |       |
|-------|--------|-------|-------|
|       | CNST   | HILL  | GNLS  |
| AIC:  | 119.61 | 71.14 | 75.14 |
| PROB: | 0      | 0.88  | 0.12  |
| RMSE: | 2.5    | 2.11  | 2.11  |

MAX\_MEAN: 4.76 MAX\_MED: 1.9 BMAD: 0.258

COFF: 0.774 HIT-CALL: 1 FITC: 40 ACTP: 1

FLAGS: 10; 18

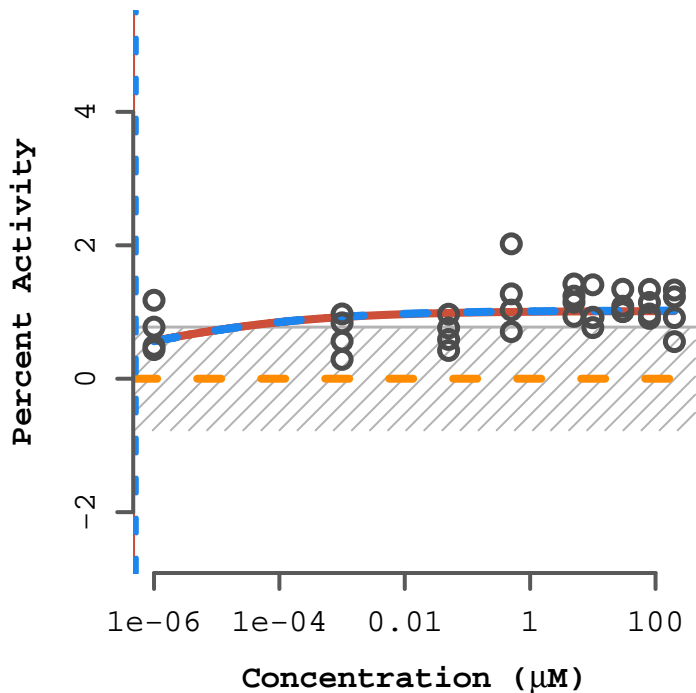

ASSAY: AEID3096 (CCTE\_Deisenroth\_DEVTOX\_RUES2-GLR\_Bra\_

NAME: Methotrexate hydrate(1:x)

CHID: 1017640 CASRN: 133073-73-1

SPID(S): ES211\_45\_45

M4ID: 42676066

HILL MODEL (in red):

|      | tp   | ga    | gw  |
|------|------|-------|-----|
| val: | 1.02 | -6.34 | 0.3 |
| sd:  | NaN  | NaN   | NaN |

GAIN-LOSS MODEL (in blue):

|      | tp   | ga    | gw  | la   | lw   |
|------|------|-------|-----|------|------|
| val: | 1.02 | -6.28 | 0.3 | 4.16 | 5.05 |
| sd:  | NaN  | NaN   | NaN | NaN  | NaN  |

|       | CNST   | HILL  | GNLS  |
|-------|--------|-------|-------|
| AIC:  | 113.13 | 28.07 | 32.05 |
| PROB: | 0      | 0.88  | 0.12  |
| RMSE: | 1.03   | 0.33  | 0.32  |

MAX\_MEAN: 1.26      MAX\_MED: 1.19      BMAD: 0.258

COFF: 0.774    HIT-CALL: 1    FITC: 40    ACTP: 1

FLAGS: 18



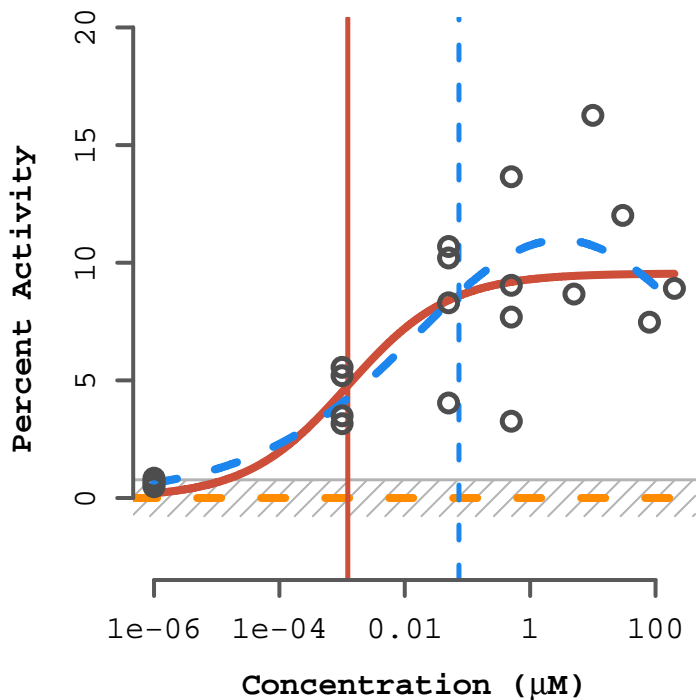

ASSAY: AEID3096 (CCTE\_Deisenroth\_DEVTOX\_RUES2-GLR\_Bra\_

NAME: Actinomycin D

CHID: 20031 CASRN: 50-76-0

SPID(S): ES211\_11\_11

M4ID: 42676101

HILL MODEL (in red):

|      | tp   | ga    | gw    |
|------|------|-------|-------|
| val: | 9.55 | -2.91 | 0.538 |
| sd:  | 1.21 | 0.36  | 0.504 |

GAIN-LOSS MODEL (in blue):

|      | tp   | ga    | gw  | la   | lw  |
|------|------|-------|-----|------|-----|
| val: | 19.2 | -1.14 | 0.3 | 2.12 | 0.3 |
| sd:  | NaN  | NaN   | NaN | NaN  | NaN |

|       | CNST  | HILL  | GNLS   |
|-------|-------|-------|--------|
| AIC:  | 151.5 | 106.5 | 110.95 |
| PROB: | 0     | 0.9   | 0.1    |
| RMSE: | 8     | 2.65  | 2.63   |

MAX\_MEAN: 16.3 MAX\_MED: 16.3 BMAD: 0.258

COFF: 0.774 HIT-CALL: 1 FITC: 41 ACTP: 1

FLAGS: 10

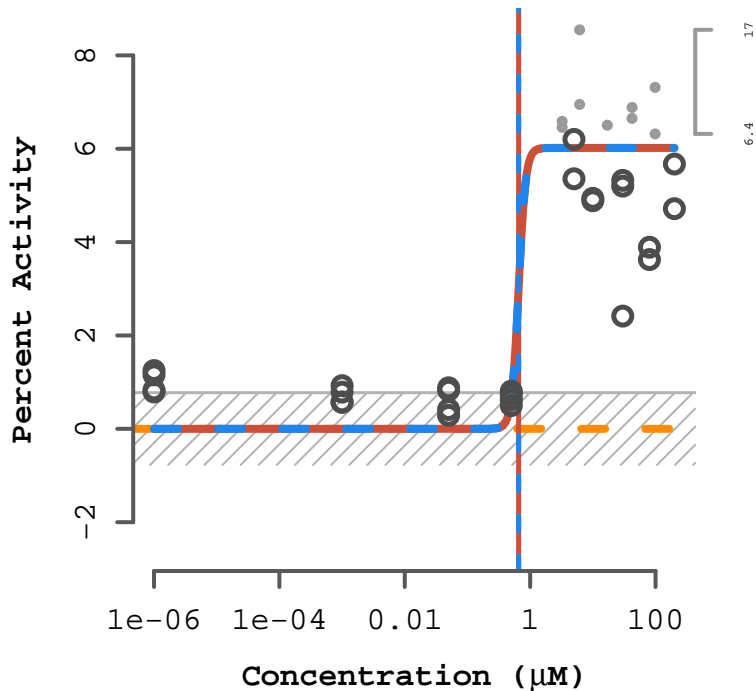

ASSAY: AEID3096 (CCTE\_Deisenroth\_DEVTOX\_RUES2-GLR\_Bra\_

NAME: Diethylstilbestrol

CHID: 20465 CASRN: 56-53-1

SPID(S): ES211\_29\_29

M4ID: 42676042 BRK

HILL MODEL (in red):

|      | tp    | ga     | gw   |
|------|-------|--------|------|
| val: | 6.02  | -0.184 | 7.69 |
| sd:  | 0.414 | 4.17   | 273  |

GAIN-LOSS MODEL (in blue):

|      | tp    | ga     | gw   | la    | lw     |
|------|-------|--------|------|-------|--------|
| val: | 6.02  | -0.183 | 7.65 | 4.1   | 5.56   |
| sd:  | 0.414 | 4.56   | 296  | 74700 | 230000 |

|       | CNST   | HILL   | GNLS   |
|-------|--------|--------|--------|
| AIC:  | 227.65 | 156.68 | 160.68 |
| PROB: | 0      | 0.88   | 0.12   |
| RMSE: | 5.62   | 2.49   | 2.49   |

MAX\_MEAN: 9.15 MAX\_MED: 7.2 BMAD: 0.258

COFF: 0.774 HIT-CALL: 1 FITC: 41 ACTP: 1

FLAGS: 10

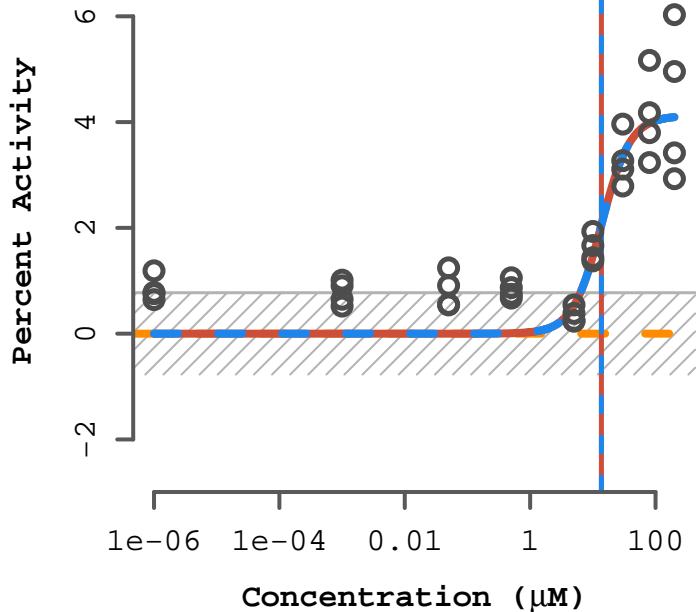

ASSAY: AEID3096 (CCTE\_Deisenroth\_DEVTOX\_RUES2-GLR\_Bra\_

NAME: 5-Fluorouracil

CHID: 20634 CASRN: 51-21-8

SPID(S): ES211\_5\_5

M4ID: 42676057

HILL MODEL (in red):

|      |       |       |       |
|------|-------|-------|-------|
|      | tp    | ga    | gw    |
| val: | 4.12  | 1.14  | 1.89  |
| sd:  | 0.497 | 0.114 | 0.677 |

GAIN-LOSS MODEL (in blue):

|      |       |       |       |      |       |
|------|-------|-------|-------|------|-------|
|      | tp    | ga    | gw    | la   | lw    |
| val: | 4.12  | 1.14  | 1.89  | 3.47 | 6.49  |
| sd:  | 0.497 | 0.114 | 0.677 | 1930 | 10700 |

|       |        |       |       |
|-------|--------|-------|-------|
|       | CNST   | HILL  | GNLS  |
| AIC:  | 169.28 | 94.53 | 98.53 |
| PROB: | 0      | 0.88  | 0.12  |
| RMSE: | 2.45   | 0.76  | 0.76  |

MAX\_MEAN: 4.33 MAX\_MED: 4.19 BMAD: 0.258

COFF: 0.774 HIT-CALL: 1 FITC: 41 ACTP: 1

FLAGS:

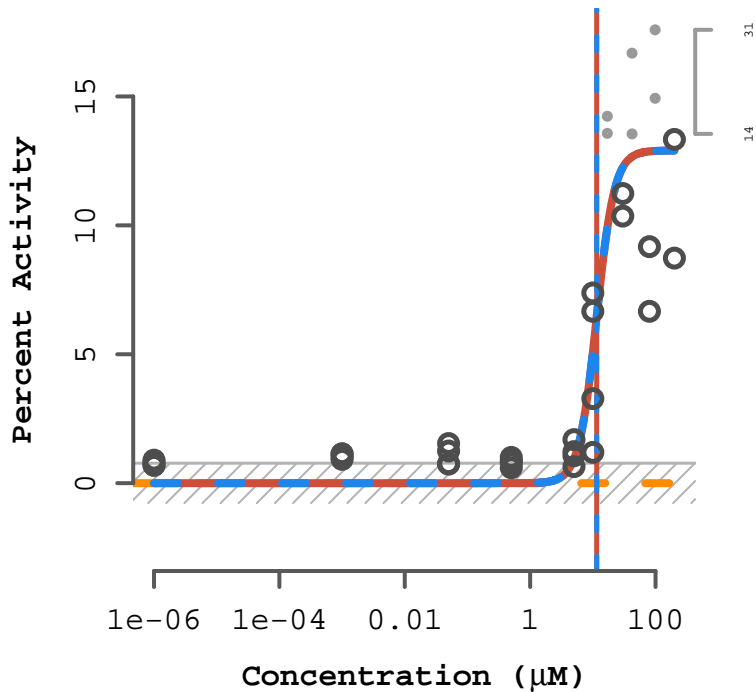

ASSAY: AEID3096 (CCTE\_Deisenroth\_DEVTOX\_RUES2-GLR\_Bra\_

NAME: all-trans-Retinoic acid

CHID: 21239 CASRN: 302-79-4

SPID(S): ES211\_13\_13

M4ID: 42676058 BRK

HILL MODEL (in red):

|      | tp   | ga    | gw   |
|------|------|-------|------|
| val: | 12.9 | 1.06  | 3.05 |
| sd:  | 1.19 | 0.078 | 1.32 |

GAIN-LOSS MODEL (in blue):

|      | tp   | ga   | gw   | la   | lw   |
|------|------|------|------|------|------|
| val: | 12.9 | 1.06 | 3.05 | 4.21 | 7.71 |
| sd:  | NaN  | NaN  | NaN  | NaN  | NaN  |

|       | CNST   | HILL   | GNLS   |
|-------|--------|--------|--------|
| AIC:  | 260.82 | 193.55 | 197.55 |
| PROB: | 0      | 0.88   | 0.12   |
| RMSE: | 9.79   | 4.38   | 4.38   |

MAX\_MEAN: 18.1 MAX\_MED: 16.4 BMAD: 0.258

COFF: 0.774 HIT-CALL: 1 FITC: 41 ACTP: 1

FLAGS: 10

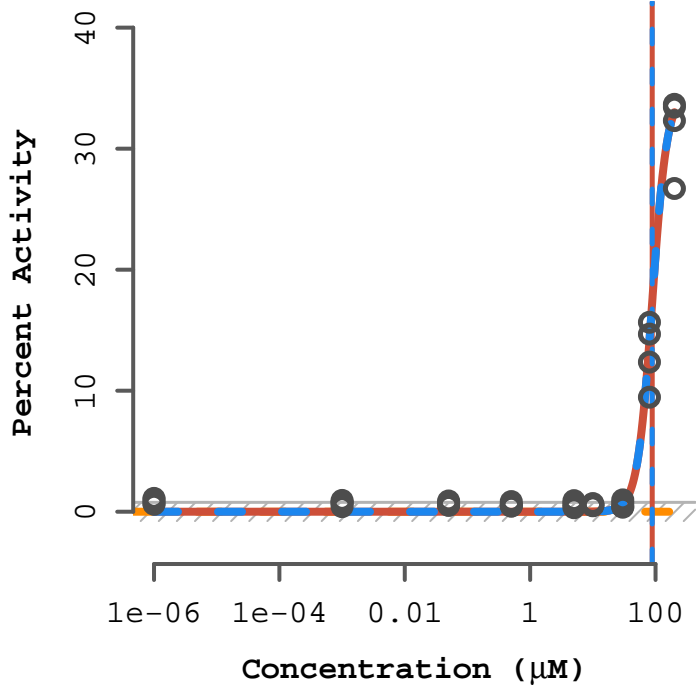

ASSAY: AEID3096 (CCTE\_Deisenroth\_DEVTOX\_RUES2-GLR\_Bra\_

NAME: Rifampicin

CHID: 21244 CASRN: 13292-46-1

SPID(S): ES211\_52\_52

M4ID: 42676041

HILL MODEL (in red):

|      |      |        |      |
|------|------|--------|------|
|      | tp   | ga     | gw   |
| val: | 34.7 | 1.95   | 3.67 |
| sd:  | 1.89 | 0.0294 | 0.91 |

GAIN-LOSS MODEL (in blue):

|      |      |        |      |       |        |
|------|------|--------|------|-------|--------|
|      | tp   | ga     | gw   | la    | lw     |
| val: | 34.7 | 1.95   | 3.67 | 2.89  | 18     |
| sd:  | 1.89 | 0.0294 | 0.91 | 21800 | 589000 |

|       |        |        |        |
|-------|--------|--------|--------|
|       | CNST   | HILL   | GNLS   |
| AIC:  | 256.11 | 118.41 | 122.41 |
| PROB: | 0      | 0.88   | 0.12   |
| RMSE: | 11.46  | 1.49   | 1.49   |

MAX\_MEAN: 31.5 MAX\_MED: 32.9 BMAD: 0.258

COFF: 0.774 HIT-CALL: 1 FITC: 41 ACTP: 1

FLAGS: 10

Percent Activity

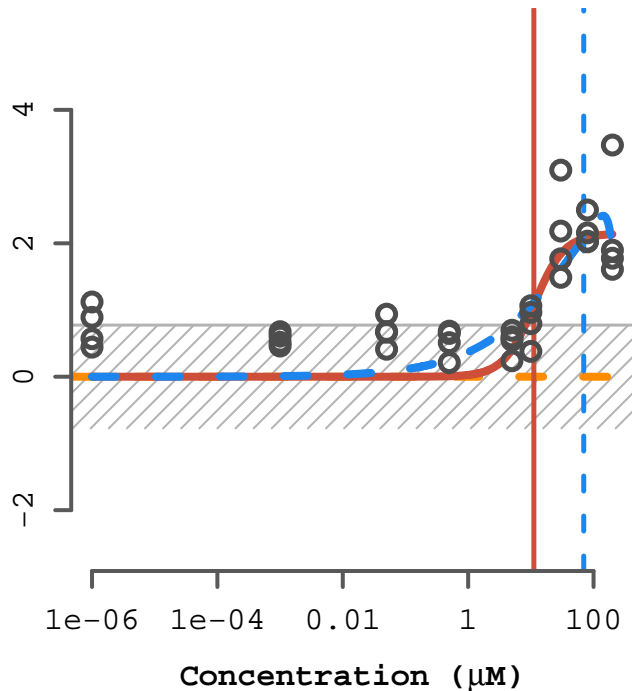

ASSAY: AEID3096 (CCTE\_Deisenroth\_DEVTOX\_RUES2-GLR\_Bra\_

NAME: 5-Bromo-2'-deoxyuridine

CHID: 33105 CASRN: 59-14-3

SPID(S): ES211\_4\_4

M4ID: 42676104

HILL MODEL (in red):

|      | tp    | ga    | gw    |
|------|-------|-------|-------|
| val: | 2.15  | 1.05  | 1.81  |
| sd:  | 0.214 | 0.106 | 0.824 |

GAIN-LOSS MODEL (in blue):

|      | tp   | ga   | gw    | la     | lw   |
|------|------|------|-------|--------|------|
| val: | 4.17 | 1.84 | 0.549 | 2.35   | 7.59 |
| sd:  | 2.83 | 1.15 | 0.379 | 0.0768 | 11.7 |

|       | CNST   | HILL  | GNLS  |
|-------|--------|-------|-------|
| AIC:  | 130.66 | 72.65 | 74.37 |
| PROB: | 0      | 0.7   | 0.3   |
| RMSE: | 1.41   | 0.57  | 0.58  |

MAX\_MEAN: 2.19 MAX\_MED: 2.09 BMAD: 0.258

COFF: 0.774 HIT-CALL: 1 FITC: 41 ACTP: 1

FLAGS:

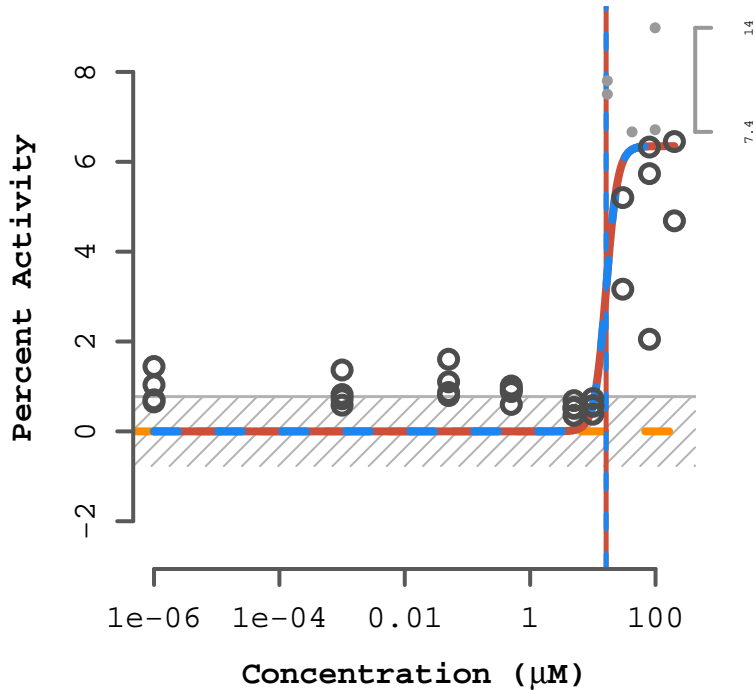

ASSAY: AEID3096 (CCTE\_Deisenroth\_DEVTOX\_RUES2-GLR\_Bra\_

NAME: Imatinib mesylate

CHID: 40502 CASRN: 220127-57-1

SPID(S): ES211\_37\_37

M4ID: 42676053 BRK

HILL MODEL (in red):

|      | tp    | ga    | gw   |
|------|-------|-------|------|
| val: | 6.35  | 1.21  | 4.63 |
| sd:  | 0.536 | 0.222 | 5.27 |

GAIN-LOSS MODEL (in blue):

|      | tp    | ga    | gw   | la   | lw   |
|------|-------|-------|------|------|------|
| val: | 6.35  | 1.21  | 4.63 | 3.73 | 5.76 |
| sd:  | 0.536 | 0.222 | 5.27 | 1660 | 6700 |

|       | CNST   | HILL   | GNLS   |
|-------|--------|--------|--------|
| AIC:  | 204.32 | 147.88 | 151.88 |
| PROB: | 0      | 0.88   | 0.12   |
| RMSE: | 4.48   | 2.03   | 2.03   |

MAX\_MEAN: 8.22 MAX\_MED: 7.53 BMAD: 0.258

COFF: 0.774 HIT-CALL: 1 FITC: 41 ACTP: 1

FLAGS: 10

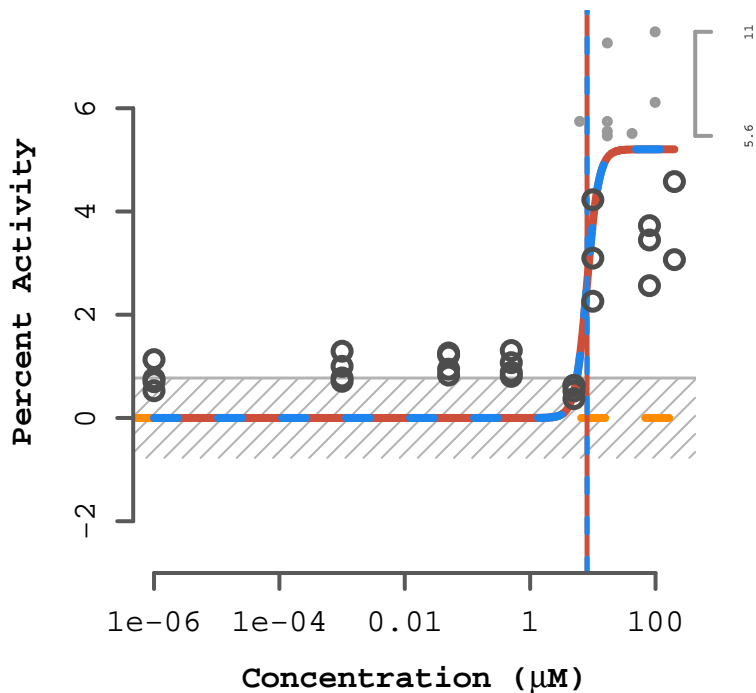

ASSAY: AEID3096 (CCTE\_Deisenroth\_DEVTOX\_RUES2-GLR\_Bra\_

NAME: Gefitinib

CHID: 41034 CASRN: 184475-35-2

SPID(S): ES211\_34\_34

M4ID: 42676093 BRK

HILL MODEL (in red):

|      | tp    | ga     | gw   |
|------|-------|--------|------|
| val: | 5.2   | 0.908  | 4.61 |
| sd:  | 0.523 | 0.0665 | 1.92 |

GAIN-LOSS MODEL (in blue):

|      | tp  | ga    | gw   | la   | lw   |
|------|-----|-------|------|------|------|
| val: | 5.2 | 0.908 | 4.61 | 4.27 | 17.3 |
| sd:  | NA  | NA    | NA   | NA   | NA   |

|       | CNST   | HILL   | GNLS   |
|-------|--------|--------|--------|
| AIC:  | 201.81 | 145.25 | 149.25 |
| PROB: | 0      | 0.88   | 0.12   |
| RMSE: | 4.05   | 1.81   | 1.81   |

MAX\_MEAN: 7.12 MAX\_MED: 6.09 BMAD: 0.258

COFF: 0.774 HIT-CALL: 1 FITC: 41 ACTP: 1

FLAGS: 10



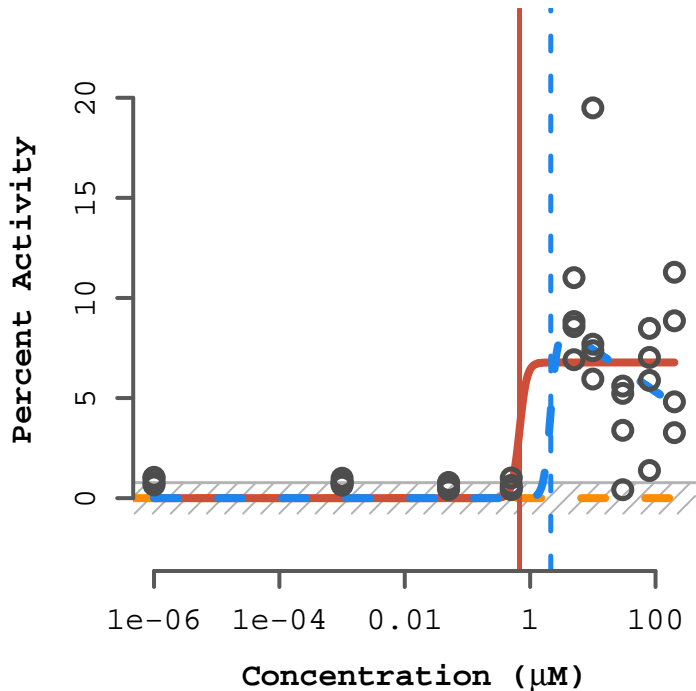

ASSAY: AEID3096 (CCTE\_Deisenroth\_DEVTOX\_RUES2-GLR\_Bra\_

NAME: Sorafenib

CHID: 41128 CASRN: 284461-73-0

SPID(S): ES211\_57\_57

M4ID: 42676051

HILL MODEL (in red):

|      | tp    | ga    | gw   |
|------|-------|-------|------|
| val: | 6.78  | -0.17 | 7.43 |
| sd:  | 0.528 | 3.29  | 186  |

GAIN-LOSS MODEL (in blue):

|      | tp   | ga    | gw   | la   | lw  |
|------|------|-------|------|------|-----|
| val: | 12.3 | 0.329 | 8    | 1.6  | 0.3 |
| sd:  | 25.2 | 1.34  | 29.3 | 6.28 | 0.6 |

|       | CNST   | HILL   | GNLS  |
|-------|--------|--------|-------|
| AIC:  | 232.01 | 173.73 | 174.5 |
| PROB: | 0      | 0.6    | 0.4   |
| RMSE: | 6.07   | 3.01   | 2.92  |

MAX\_MEAN: 10.1 MAX\_MED: 8.7 BMAD: 0.258

COFF: 0.774 HIT-CALL: 1 FITC: 41 ACTP: 1

FLAGS: 10

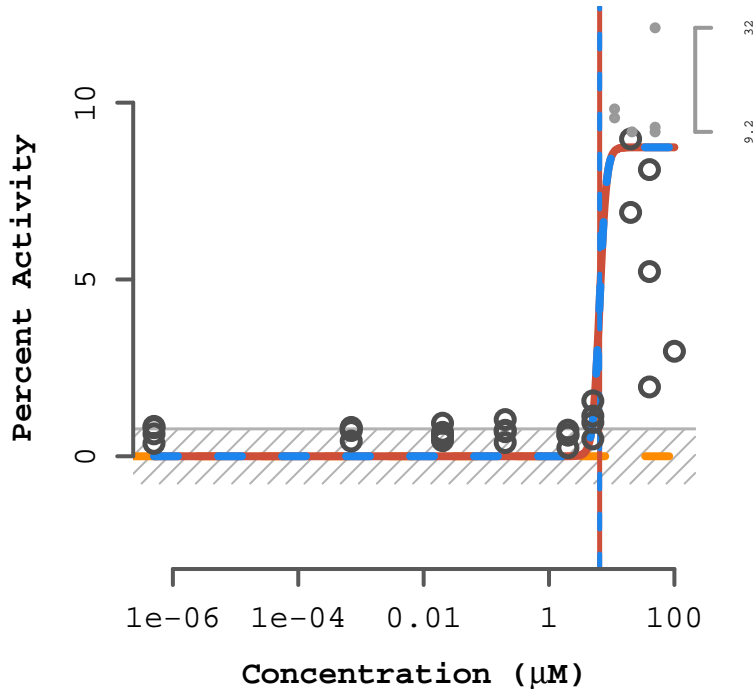

ASSAY: AEID3096 (CCTE\_Deisenroth\_DEVTOX\_RUES2-GLR\_Bra

NAME: Vandetanib

CHID: 46681 CASRN: 443913-73-3

SPID(S): ES211\_64\_64

M4ID: 42676081 BRK

HILL MODEL (in red):

|      | tp    | ga    | gw |
|------|-------|-------|----|
| val: | 8.74  | 0.808 | 8  |
| sd:  | 0.588 | 0.569 | 42 |

GAIN-LOSS MODEL (in blue):

|      | tp    | ga    | gw   | la   | lw   |
|------|-------|-------|------|------|------|
| val: | 8.74  | 0.808 | 8    | 2.78 | 10.6 |
| sd:  | 0.588 | 0.579 | 42.7 | 662  | 8950 |

|       | CNST   | HILL   | GNLS   |
|-------|--------|--------|--------|
| AIC:  | 226.71 | 168.97 | 172.97 |
| PROB: | 0      | 0.88   | 0.12   |
| RMSE: | 7.29   | 4.41   | 4.41   |

MAX\_MEAN: 13.7 MAX\_MED: 10.6 BMAD: 0.258

COFF: 0.774 HIT-CALL: 1 FITC: 41 ACTP: 1

FLAGS: 10

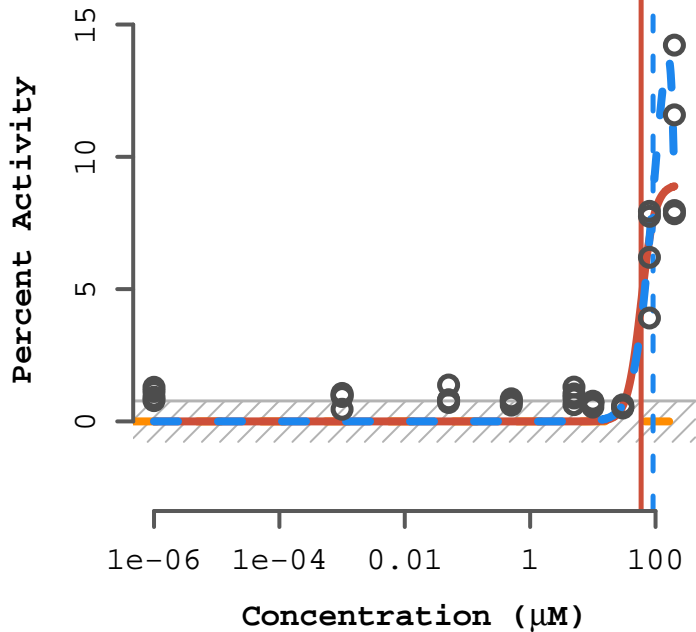

ASSAY: AEID3096 (CCTE\_Deisenroth\_DEVTOX\_RUES2-GLR\_Bra\_

NAME: Esomeprazole magnesium hydrate

CHID: 746660 CASRN: 668985-31-7

SPID(S): ES211\_43\_43

M4ID: 42676083

HILL MODEL (in red):

|      | tp   | ga     | gw   |
|------|------|--------|------|
| val: | 8.96 | 1.77   | 3.95 |
| sd:  | 1.14 | 0.0644 | 1.1  |

GAIN-LOSS MODEL (in blue):

|      | tp   | ga   | gw   | la   | lw   |
|------|------|------|------|------|------|
| val: | 17.1 | 1.96 | 2.94 | 2.31 | 12.9 |
| sd:  | NaN  | NaN  | NaN  | NaN  | NaN  |

|       | CNST  | HILL   | GNLS   |
|-------|-------|--------|--------|
| AIC:  | 194.2 | 126.47 | 130.35 |
| PROB: | 0     | 0.87   | 0.13   |
| RMSE: | 4.28  | 1.38   | 1.38   |

MAX\_MEAN: 10.4      MAX\_MED: 9.78      BMAD: 0.258

COFF: 0.774    HIT-CALL: 1    FITC: 41    ACTP: 1

FLAGS: 10

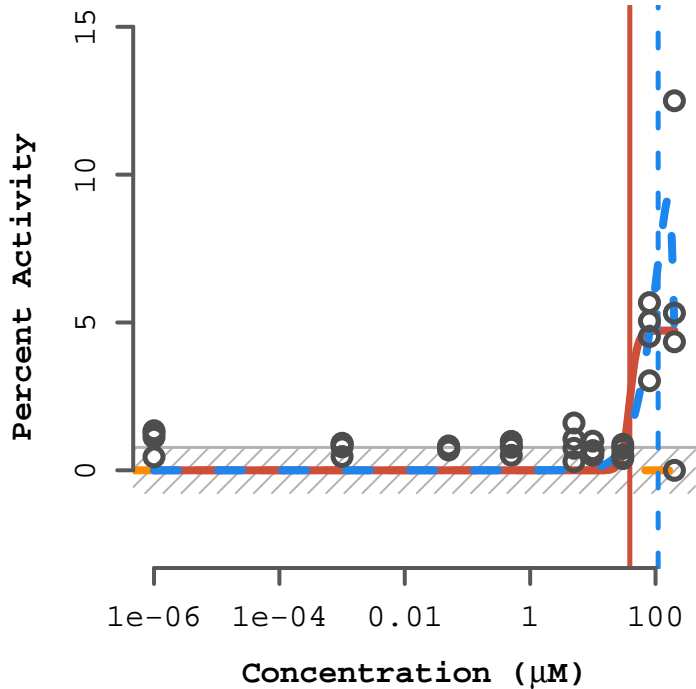

ASSAY: AEID3096 (CCTE\_Deisenroth\_DEVTOX\_RUES2-GLR\_Bra

NAME: Mianserin hydrochloride

CHID: 944145 CASRN: 21535-47-7

SPID(S): ES211\_47\_47

M4ID: 42676075

HILL MODEL (in red):

|      | tp   | ga   | gw   |
|------|------|------|------|
| val: | 4.73 | 1.59 | 7.17 |
| sd:  | 1.27 | 1.2  | 75.6 |

GAIN-LOSS MODEL (in blue):

|      | tp  | ga   | gw   | la   | lw  |
|------|-----|------|------|------|-----|
| val: | 14  | 2.04 | 2.16 | 2.29 | 14  |
| sd:  | NaN | NaN  | NaN  | NaN  | NaN |

|       | CNST  | HILL   | GNLS   |
|-------|-------|--------|--------|
| AIC:  | 163.6 | 126.57 | 130.01 |
| PROB: | 0     | 0.85   | 0.15   |
| RMSE: | 2.94  | 1.72   | 1.71   |

MAX\_MEAN: 5.54      MAX\_MED: 4.83      BMAD: 0.258

COFF: 0.774    HIT-CALL: 1    FITC: 41    ACTP: 1

FLAGS: 10

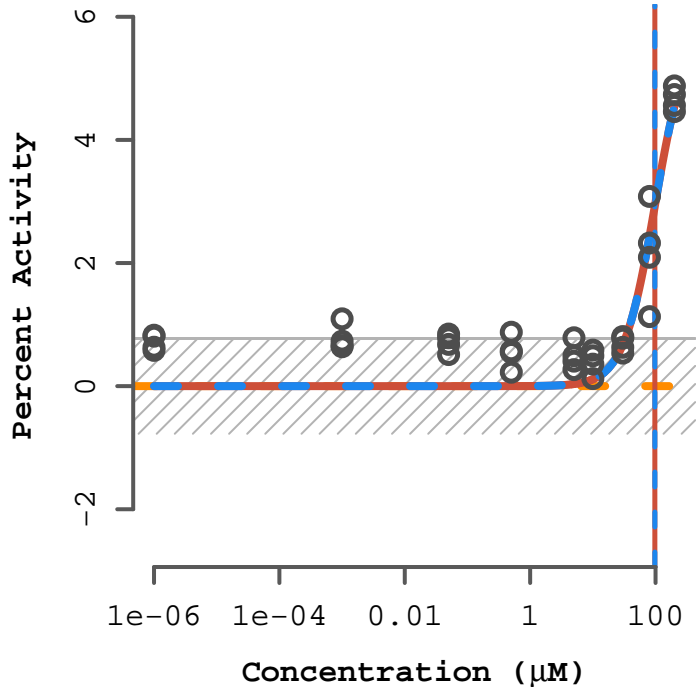

ASSAY: AEID3096 (CCTE\_Deisenroth\_DEVTOX\_RUES2-GLR\_Bra\_

NAME: 4-Hydroxybenzoic acid butyl ester

CHID: 20209 CASRN: 94-26-8

SPID(S): ES211\_19\_19

M4ID: 42676062

HILL MODEL (in red):

|      |      |       |       |
|------|------|-------|-------|
|      | tp   | ga    | gw    |
| val: | 5.85 | 1.99  | 1.73  |
| sd:  | 1.08 | 0.123 | 0.457 |

GAIN-LOSS MODEL (in blue):

|      |      |       |       |      |      |
|------|------|-------|-------|------|------|
|      | tp   | ga    | gw    | la   | lw   |
| val: | 5.85 | 1.99  | 1.73  | 4.06 | 4.76 |
| sd:  | 1.08 | 0.123 | 0.457 | 1440 | 3910 |

|       |        |      |      |
|-------|--------|------|------|
|       | CNST   | HILL | GNLS |
| AIC:  | 138.74 | 75   | 79   |
| PROB: | 0      | 0.88 | 0.12 |
| RMSE: | 1.82   | 0.58 | 0.58 |

MAX\_MEAN: 4.66 MAX\_MED: 4.65 BMAD: 0.258

COFF: 0.774 HIT-CALL: 1 FITC: 42 ACTP: 1

FLAGS:

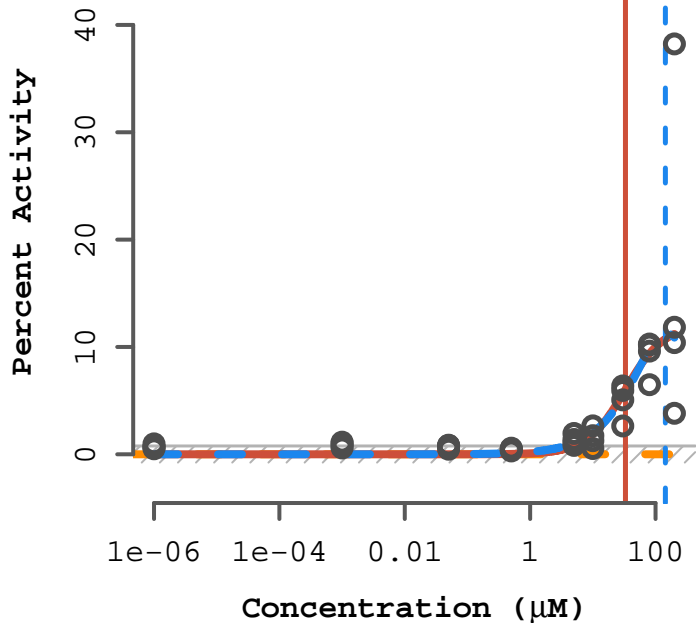

ASSAY: AEID3096 (CCTE\_Deisenroth\_DEVTOX\_RUES2-GLR\_Bra\_

NAME: Lovastatin

CHID: 20784 CASRN: 75330-75-5

SPID(S): ES211\_42\_42

M4ID: 42676060

HILL MODEL (in red):

|      | tp   | ga    | gw    |
|------|------|-------|-------|
| val: | 12.1 | 1.52  | 1.41  |
| sd:  | 1.22 | 0.093 | 0.285 |

GAIN-LOSS MODEL (in blue):

|      | tp  | ga   | gw    | la   | lw   |
|------|-----|------|-------|------|------|
| val: | 31  | 2.16 | 0.995 | 2.41 | 1.72 |
| sd:  | NaN | NaN  | NaN   | NaN  | NaN  |

|       | CNST   | HILL   | GNLS   |
|-------|--------|--------|--------|
| AIC:  | 224.93 | 148.19 | 150.62 |
| PROB: | 0      | 0.77   | 0.23   |
| RMSE: | 7.83   | 4.77   | 4.81   |

MAX\_MEAN: 16.1 MAX\_MED: 11.1 BMAD: 0.258

COFF: 0.774 HIT-CALL: 1 FITC: 42 ACTP: 1

FLAGS: 10

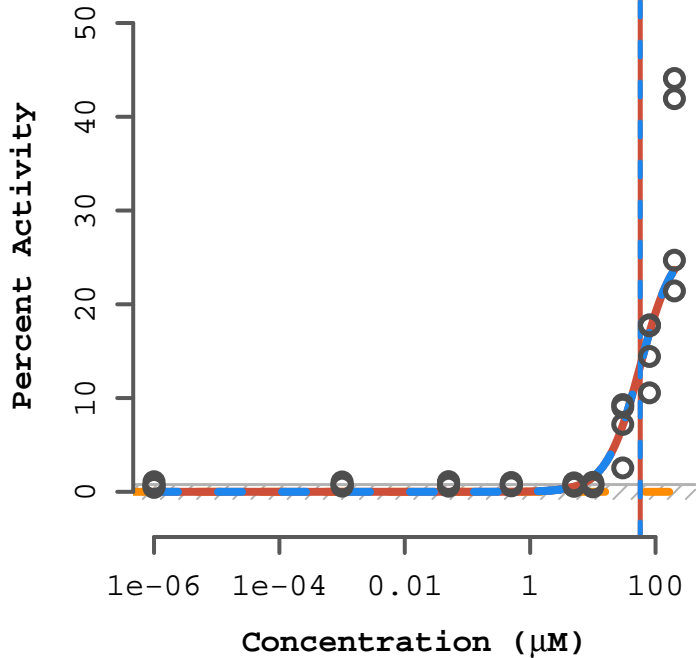

ASSAY: AEID3096 (CCTE\_Deisenroth\_DEVTOX\_RUES2-GLR\_Bra\_

NAME: 13-cis Retinoic acid

CHID: 23177 CASRN: 4759-48-2

SPID(S): ES211\_2\_2

M4ID: 42676048

HILL MODEL (in red):

|      | tp   | ga     | gw    |
|------|------|--------|-------|
| val: | 26.9 | 1.76   | 1.6   |
| sd:  | 3.3  | 0.0969 | 0.249 |

GAIN-LOSS MODEL (in blue):

|      | tp   | ga     | gw    | la   | lw   |
|------|------|--------|-------|------|------|
| val: | 26.9 | 1.76   | 1.6   | 4.14 | 4.14 |
| sd:  | 3.3  | 0.0969 | 0.249 | 949  | 2160 |

|       | CNST   | HILL   | GNLS   |
|-------|--------|--------|--------|
| AIC:  | 273.14 | 176.76 | 180.76 |
| PROB: | 0      | 0.88   | 0.12   |
| RMSE: | 12.87  | 4.85   | 4.85   |

MAX\_MEAN: 33 MAX\_MED: 33.3 BMAD: 0.258

COFF: 0.774 HIT-CALL: 1 FITC: 42 ACTP: 1

FLAGS: 10

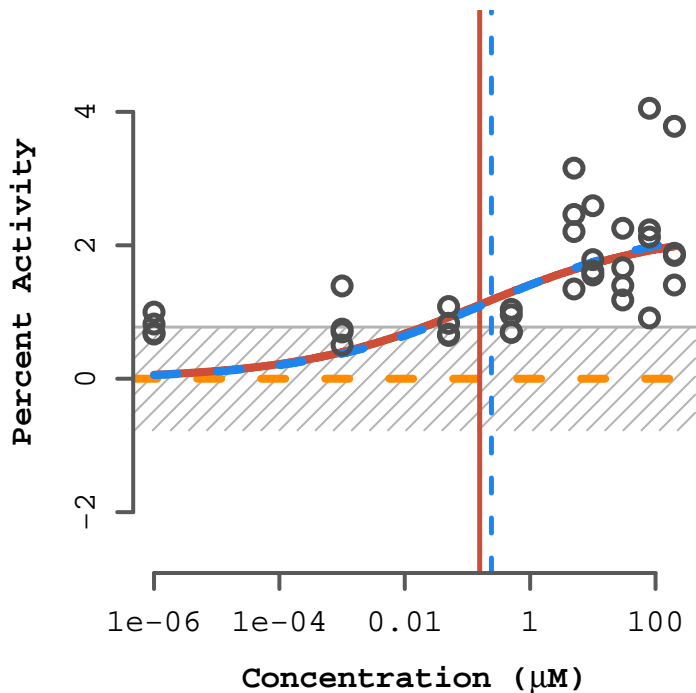

ASSAY: AEID3096 (CCTE\_Deisenroth\_DEVTOX\_RUES2-GLR\_Bra\_

NAME: Cytarabine hydrochloride

CHID: 24891 CASRN: 69-74-9

SPID(S): ES211\_25\_25

M4ID: 42676099

HILL MODEL (in red):

|      | tp   | ga     | gw  |
|------|------|--------|-----|
| val: | 2.22 | -0.805 | 0.3 |
| sd:  | NaN  | NaN    | NaN |

GAIN-LOSS MODEL (in blue):

|      | tp   | ga     | gw  | la   | lw   |
|------|------|--------|-----|------|------|
| val: | 2.32 | -0.618 | 0.3 | 2.38 | 13.3 |
| sd:  | NaN  | NaN    | NaN | NaN  | NaN  |

|       | CNST   | HILL  | GNLS  |
|-------|--------|-------|-------|
| AIC:  | 148.22 | 84.96 | 88.83 |
| PROB: | 0      | 0.87  | 0.13  |
| RMSE: | 1.75   | 0.72  | 0.72  |

MAX\_MEAN: 2.33 MAX\_MED: 2.33 BMAD: 0.258

COFF: 0.774 HIT-CALL: 1 FITC: 42 ACTP: 1

FLAGS:



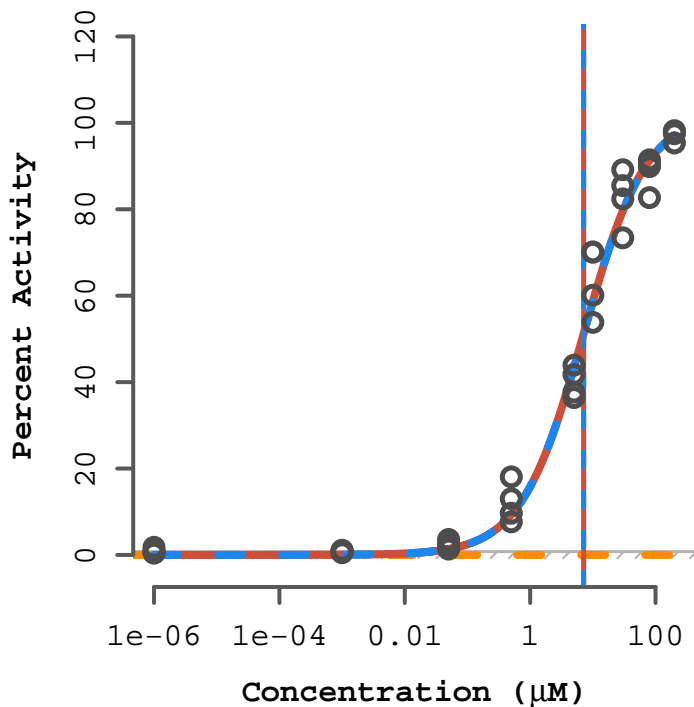

ASSAY: AEID3096 (CCTE\_Deisenroth\_DEVTOX\_RUES2-GLR\_Bra\_

NAME: Adriamycin hydrochloride

CHID: 30636 CASRN: 25316-40-9

SPID(S): ES211\_67\_67

M4ID: 42676061

HILL MODEL (in red):

|      |      |        |        |
|------|------|--------|--------|
|      | tp   | ga     | gw     |
| val: | 102  | 0.853  | 0.867  |
| sd:  | 2.75 | 0.0488 | 0.0841 |

GAIN-LOSS MODEL (in blue):

|      |      |        |        |        |        |
|------|------|--------|--------|--------|--------|
|      | tp   | ga     | gw     | la     | lw     |
| val: | 102  | 0.853  | 0.867  | 3.52   | 11.4   |
| sd:  | 2.75 | 0.0488 | 0.0841 | 106000 | 653000 |

|       |        |        |        |
|-------|--------|--------|--------|
|       | CNST   | HILL   | GNLS   |
| AIC:  | 399.74 | 214.15 | 218.15 |
| PROB: | 0      | 0.88   | 0.12   |
| RMSE: | 57.79  | 4.51   | 4.51   |

MAX\_MEAN: 97.3 MAX\_MED: 97.8 BMAD: 0.258

COFF: 0.774 HIT-CALL: 1 FITC: 42 ACTP: 1

FLAGS: 10

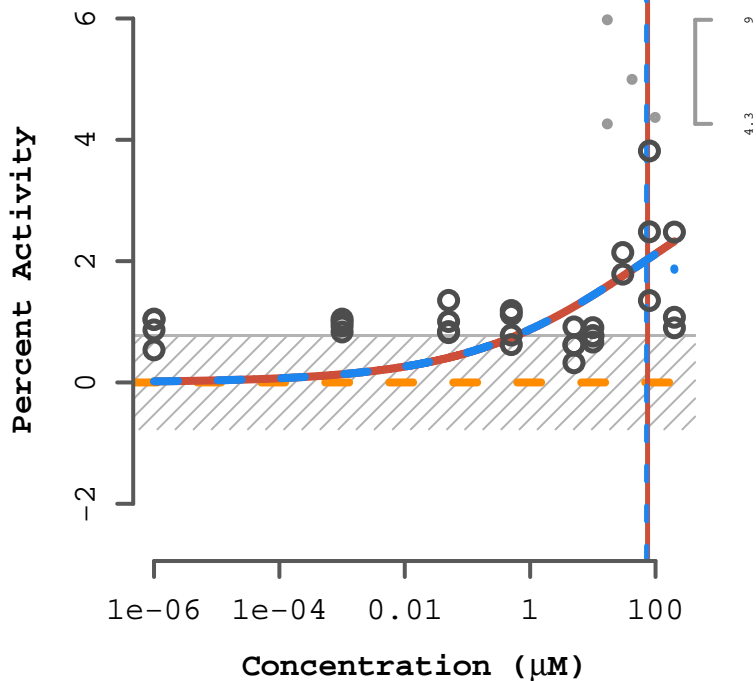

ASSAY: AEID3096 (CCTE\_Deisenroth\_DEVTOX\_RUES2-GLR\_Bra\_

NAME: Amiodarone hydrochloride

CHID: 37185 CASRN: 19774-82-4

SPID(S): ES211\_14\_14

M4ID: 42676096 BRK

HILL MODEL (in red):

|      | tp   | ga   | gw  |
|------|------|------|-----|
| val: | 4.06 | 1.87 | 0.3 |
| sd:  | NaN  | NaN  | NaN |

GAIN-LOSS MODEL (in blue):

|      | tp   | ga   | gw  | la   | lw   |
|------|------|------|-----|------|------|
| val: | 4.04 | 1.86 | 0.3 | 2.34 | 16.1 |
| sd:  | NaN  | NaN  | NaN | NaN  | NaN  |

|       | CNST   | HILL   | GNLS   |
|-------|--------|--------|--------|
| AIC:  | 158.84 | 129.65 | 133.16 |
| PROB: | 0      | 0.85   | 0.15   |
| RMSE: | 2.45   | 1.67   | 1.67   |

MAX\_MEAN: 4.3 MAX\_MED: 3.22 BMAD: 0.258

COFF: 0.774 HIT-CALL: 1 FITC: 42 ACTP: 1

FLAGS: 10

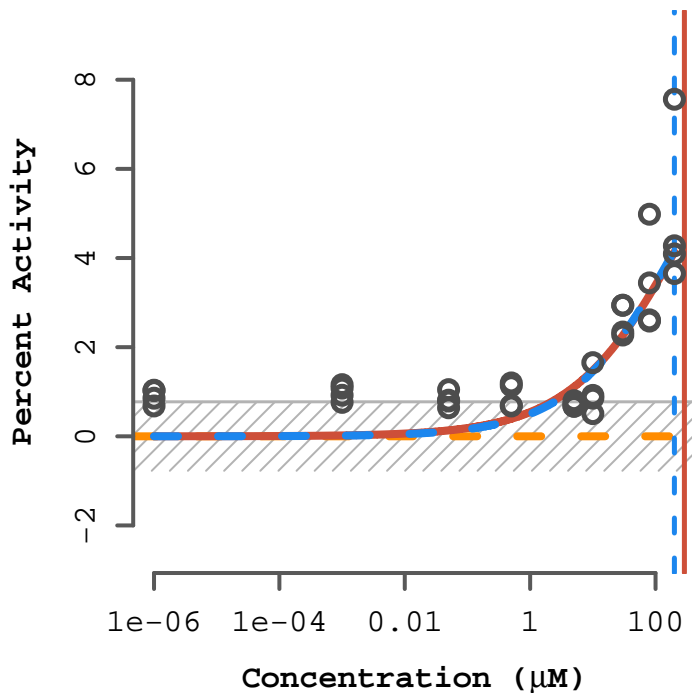

ASSAY: AEID3096 (CCTE\_Deisenroth\_DEVTOX\_RUES2-GLR\_Bra\_

NAME: 6-aminopyridine-3-carboxamide

CHID: 51446 CASRN: 329-89-5

SPID(S): ES211\_7\_7

M4ID: 42676090

HILL MODEL (in red):

|      |      |      |       |
|------|------|------|-------|
|      | tp   | ga   | gw    |
| val: | 9.08 | 2.46 | 0.486 |
| sd:  | 6.51 | 1.25 | 0.21  |

GAIN-LOSS MODEL (in blue):

|      |      |     |       |      |    |
|------|------|-----|-------|------|----|
|      | tp   | ga  | gw    | la   | lw |
| val: | 8.34 | 2.3 | 0.518 | 3.61 | 14 |
| sd:  | NA   | NA  | NA    | NA   | NA |

|       |        |       |        |
|-------|--------|-------|--------|
|       | CNST   | HILL  | GNLS   |
| AIC:  | 164.36 | 99.53 | 103.72 |
| PROB: | 0      | 0.89  | 0.11   |
| RMSE: | 2.38   | 0.91  | 0.91   |

MAX\_MEAN: 4.9 MAX\_MED: 4.18 BMAD: 0.258

COFF: 0.774 HIT-CALL: 1 FITC: 42 ACTP: 1

FLAGS: 10

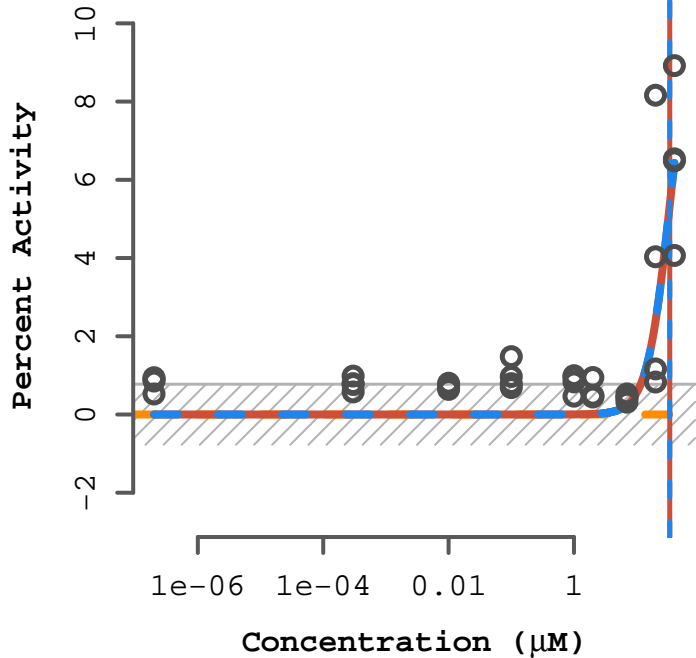

ASSAY: AEID3096 (CCTE\_Deisenroth\_DEVTOX\_RUES2-GLR\_Bra\_

NAME: Dorsomorphin

CHID: 1006988 CASRN: 866405-64-3

SPID(S): ES211\_6\_6

M4ID: 42676084

HILL MODEL (in red):

|      | tp   | ga    | gw   |
|------|------|-------|------|
| val: | 10.7 | 1.53  | 2.39 |
| sd:  | 8.1  | 0.299 | 1.9  |

GAIN-LOSS MODEL (in blue):

|      | tp   | ga    | gw   | la  | lw   |
|------|------|-------|------|-----|------|
| val: | 10.7 | 1.53  | 2.39 | 3.6 | 3.51 |
| sd:  | 8.1  | 0.299 | 1.9  | 989 | 1760 |

|       | CNST   | HILL   | GNLS   |
|-------|--------|--------|--------|
| AIC:  | 161.29 | 123.14 | 127.14 |
| PROB: | 0      | 0.88   | 0.12   |
| RMSE: | 2.8    | 1.37   | 1.37   |

MAX\_MEAN: 6.5      MAX\_MED: 6.51      BMAD: 0.258

COFF: 0.774    HIT-CALL: 1    FITC: 42    ACTP: 1

FLAGS: 10

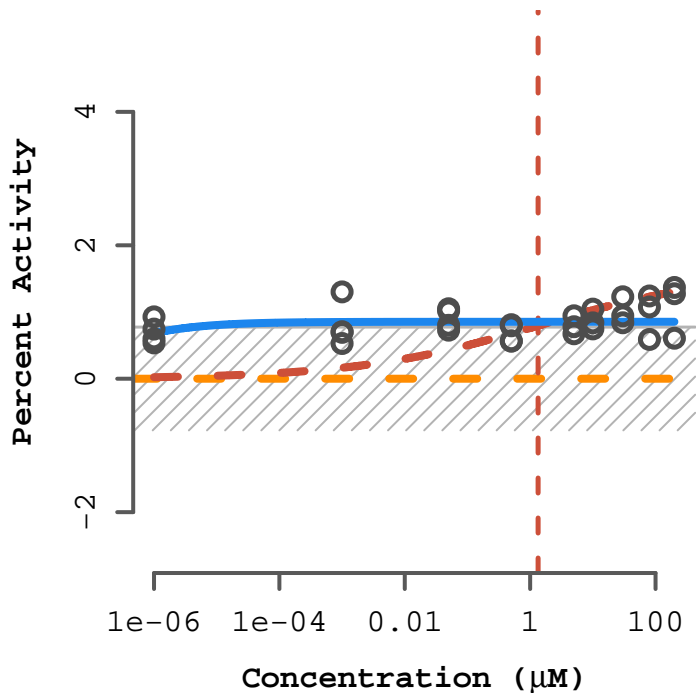

ASSAY: AEID3096 (CCTE\_Deisenroth\_DEVTOX\_RUES2-GLR\_Bra\_

NAME: Folic acid

CHID: 22519 CASRN: 59-30-3

SPID(S): ES211\_33\_33

M4ID: 42676044

HILL MODEL (in red):

|      | tp   | ga    | gw  |
|------|------|-------|-----|
| val: | 1.59 | 0.127 | 0.3 |
| sd:  | NaN  | NaN   | NaN |

GAIN-LOSS MODEL (in blue):

|      | tp    | ga | gw    | la   | lw   |
|------|-------|----|-------|------|------|
| val: | 0.853 | -7 | 0.608 | 4.27 | 17.8 |
| sd:  | NA    | NA | NA    | NA   | NA   |

|       | CNST  | HILL  | GNLS  |
|-------|-------|-------|-------|
| AIC:  | 89.21 | 47.51 | 13.03 |
| PROB: | 0     | 0     | 1     |
| RMSE: | 0.89  | 0.45  | 0.24  |

MAX\_MEAN: 1.08 MAX\_MED: 1.27 BMAD: 0.258

COFF: 0.774 HIT-CALL: 1 FITC: 45 ACTP: 1

FLAGS: 11; 18

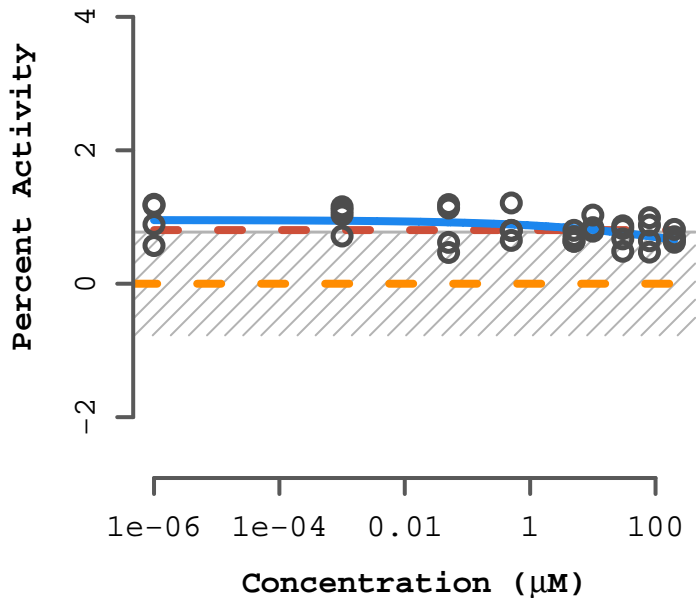

ASSAY: AEID3096 (CCTE\_Deisenroth\_DEVTOX\_RUES2-GLR\_Bra\_

NAME: Ibuprofen

CHID: 20732 CASRN: 15687-27-1

SPID(S): ES211\_36\_36

M4ID: 42676091

HILL MODEL (in red):

|      | tp     | ga  | gw   |
|------|--------|-----|------|
| val: | 0.804  | -7  | 7.35 |
| sd:  | 0.0381 | 161 | 1030 |

GAIN-LOSS MODEL (in blue):

|      | tp    | ga   | gw  | la   | lw  |
|------|-------|------|-----|------|-----|
| val: | 0.955 | -6.7 | 7.4 | 3.46 | 0.3 |
| sd:  | NaN   | NaN  | NaN | NaN  | NaN |

|       | CNST   | HILL | GNLS |
|-------|--------|------|------|
| AIC:  | 100.17 | 3.72 | 1.47 |
| PROB: | 0      | 0.24 | 0.76 |
| RMSE: | 0.85   | 0.22 | 0.2  |

MAX\_MEAN: 1 MAX\_MED: 1.07 BMAD: 0.258

COFF: 0.774 HIT-CALL: 1 FITC: 49 ACTP: 1

FLAGS: 18

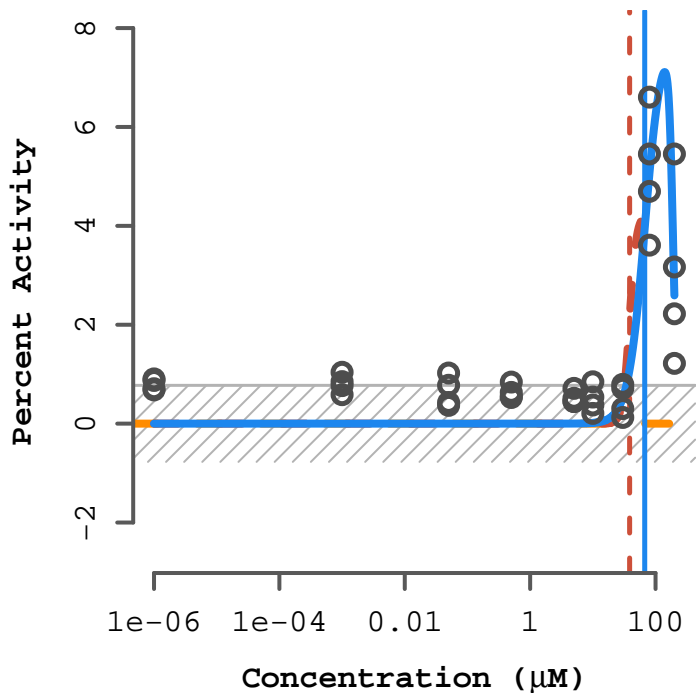

ASSAY: AEID3096 (CCTE\_Deisenroth\_DEVTOX\_RUES2-GLR\_Bra\_

NAME: Bisphenol A

CHID: 20182 CASRN: 80-05-7

SPID(S): ES211\_16\_16

M4ID: 42676059

HILL MODEL (in red):

|      | tp    | ga     | gw   |
|------|-------|--------|------|
| val: | 4.24  | 1.59   | 8    |
| sd:  | 0.556 | 0.0838 | 5.61 |

GAIN-LOSS MODEL (in blue):

|      | tp   | ga    | gw   | la     | lw   |
|------|------|-------|------|--------|------|
| val: | 7.92 | 1.83  | 3.29 | 2.28   | 12.5 |
| sd:  | 23.2 | 0.947 | 5.58 | 0.0231 | 66.3 |

|       | CNST   | HILL   | GNLS   |
|-------|--------|--------|--------|
| AIC:  | 148.11 | 108.64 | 103.71 |
| PROB: | 0      | 0.08   | 0.92   |
| RMSE: | 2.16   | 0.99   | 0.86   |

MAX\_MEAN: 5.09 MAX\_MED: 5.08 BMAD: 0.258

COFF: 0.774 HIT-CALL: 1 FITC: 50 ACTP: 1

FLAGS: 10

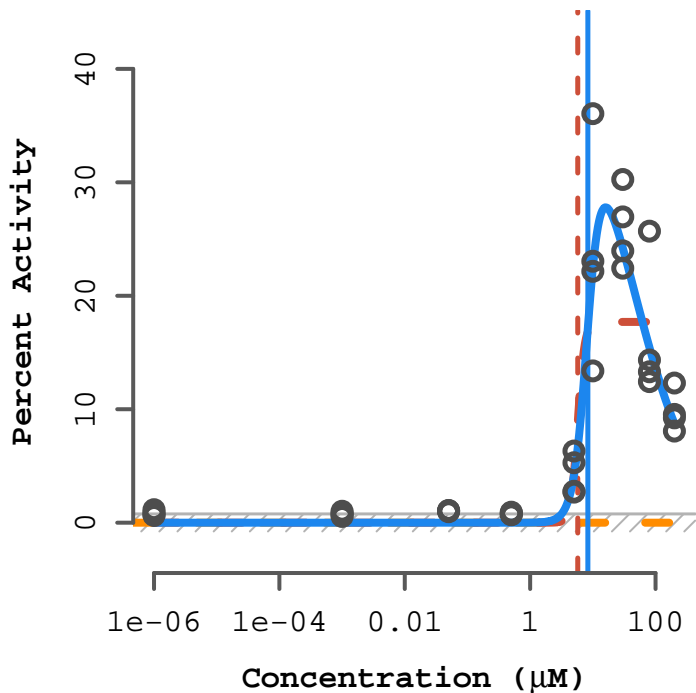

ASSAY: AEID3096 (CCTE\_Deisenroth\_DEVTOX\_RUES2-GLR\_Bra

NAME: 1-(p-Chlorobenzoyl)-5-methoxy-2-methyl-Indole-

CHID: 20740 CASRN: 53-86-1

SPID(S): ES211\_38\_38

M4ID: 42676077

HILL MODEL (in red):

|      | tp   | ga     | gw   |
|------|------|--------|------|
| val: | 17.7 | 0.759  | 8    |
| sd:  | 2.26 | 0.0415 | 4.36 |

GAIN-LOSS MODEL (in blue):

|      | tp   | ga     | gw    | la    | lw    |
|------|------|--------|-------|-------|-------|
| val: | 43.3 | 0.921  | 4.04  | 1.61  | 0.858 |
| sd:  | 14   | 0.0404 | 0.542 | 0.335 | 0.187 |

|       | CNST  | HILL   | GNLS   |
|-------|-------|--------|--------|
| AIC:  | 291.3 | 229.42 | 186.49 |
| PROB: | 0     | 0      | 1      |
| RMSE: | 13.85 | 5.59   | 3.62   |

MAX\_MEAN: 25.9 MAX\_MED: 25.5 BMAD: 0.258

COFF: 0.774 HIT-CALL: 1 FITC: 50 ACTP: 1

FLAGS: 10



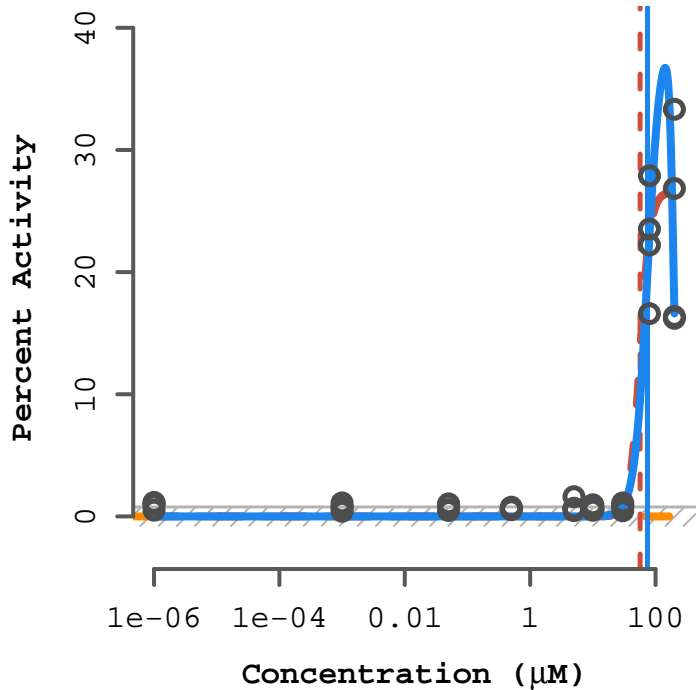

ASSAY: AEID3096 (CCTE\_Deisenroth\_DEVTOX\_RUES2-GLR\_Bra\_

NAME: Retinol

CHID: 23556 CASRN: 68-26-8

SPID(S): ES211\_51\_51

M4ID: 42676071

HILL MODEL (in red):

|      |      |        |       |
|------|------|--------|-------|
|      | tp   | ga     | gw    |
| val: | 26.6 | 1.75   | 5.38  |
| sd:  | 1.21 | 0.0304 | 0.794 |

GAIN-LOSS MODEL (in blue):

|      |      |        |       |        |      |
|------|------|--------|-------|--------|------|
|      | tp   | ga     | gw    | la     | lw   |
| val: | 40   | 1.87   | 4.21  | 2.29   | 12.2 |
| sd:  | 9.43 | 0.0457 | 0.998 | 0.0239 | 21   |

|       |        |        |        |
|-------|--------|--------|--------|
|       | CNST   | HILL   | GNLS   |
| AIC:  | 261.81 | 164.91 | 161.86 |
| PROB: | 0      | 0.18   | 0.82   |
| RMSE: | 11.16  | 3.07   | 3.6    |

MAX\_MEAN: 23.2 MAX\_MED: 22.9 BMAD: 0.258

COFF: 0.774 HIT-CALL: 1 FITC: 50 ACTP: 1

FLAGS: 10

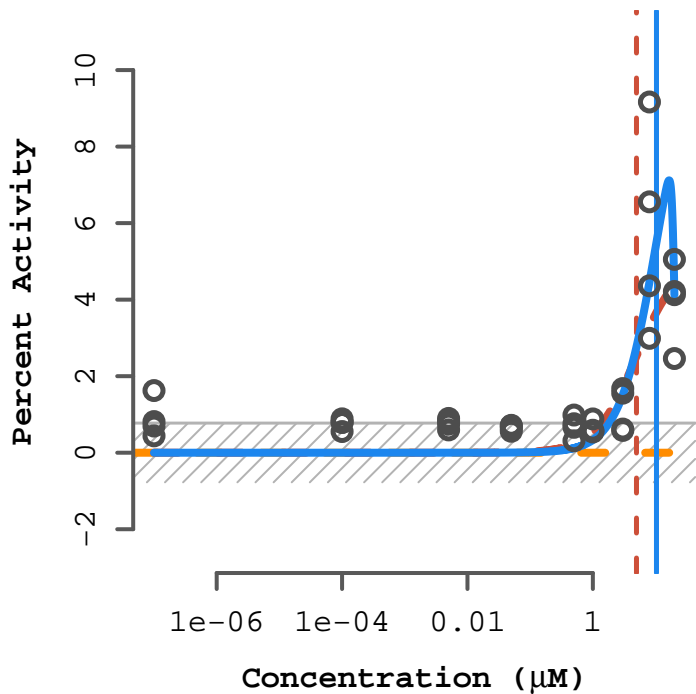

ASSAY: AEID3096 (CCTE\_Deisenroth\_DEVTOX\_RUES2-GLR\_Bra\_

NAME: Ziprasidone

CHID: 23753 CASRN: 146939-27-7

SPID(S): ES211\_66\_66

M4ID: 42676046

HILL MODEL (in red):

|      | tp   | ga    | gw   |
|------|------|-------|------|
| val: | 5.04 | 0.696 | 1.34 |
| sd:  | 1.96 | 0.363 | 1.25 |

GAIN-LOSS MODEL (in blue):

|      | tp  | ga   | gw   | la  | lw   |
|------|-----|------|------|-----|------|
| val: | 11  | 1.02 | 1.48 | 1.3 | 17.9 |
| sd:  | NaN | NaN  | NaN  | NaN | NaN  |

|       | CNST   | HILL   | GNLS  |
|-------|--------|--------|-------|
| AIC:  | 161.94 | 114.79 | 114.7 |
| PROB: | 0      | 0.49   | 0.51  |
| RMSE: | 2.59   | 1.34   | 1.14  |

MAX\_MEAN: 5.77 MAX\_MED: 5.46 BMAD: 0.258

COFF: 0.774 HIT-CALL: 1 FITC: 51 ACTP: 1

FLAGS: 10

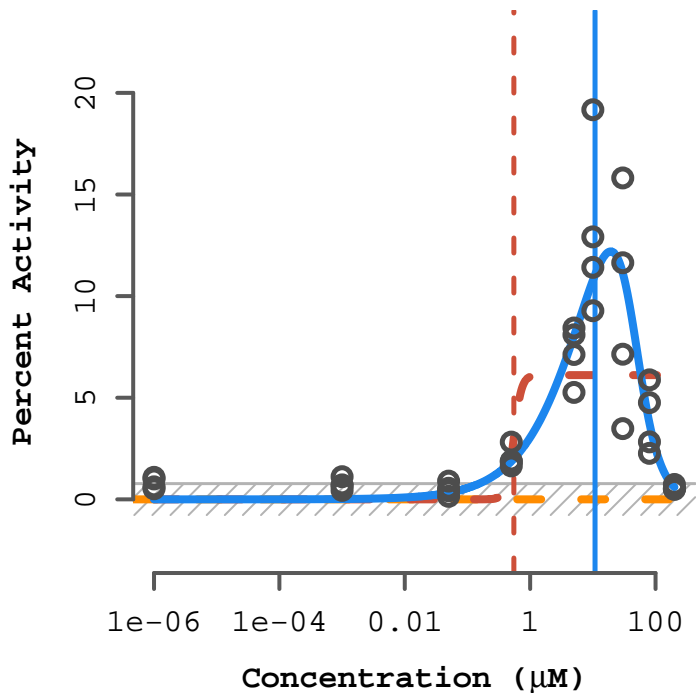

ASSAY: AEID3096 (CCTE\_Deisenroth\_DEVTOX\_RUES2-GLR\_Bra

NAME: Dasatinib

CHID: 40979 CASRN: 302962-49-8

SPID(S): ES211\_26\_26

M4ID: 42676040

HILL MODEL (in red):

|      | tp    | ga    | gw   |
|------|-------|-------|------|
| val: | 6.11  | -0.26 | 7.22 |
| sd:  | 0.915 | 2.82  | 493  |

GAIN-LOSS MODEL (in blue):

|      | tp | ga    | gw    | la    | lw    |
|------|----|-------|-------|-------|-------|
| val: | 23 | 1.04  | 0.789 | 1.64  | 2.31  |
| sd:  | 12 | 0.505 | 0.174 | 0.126 | 0.484 |

|       | CNST   | HILL   | GNLS   |
|-------|--------|--------|--------|
| AIC:  | 233.91 | 202.71 | 156.69 |
| PROB: | 0      | 0      | 1      |
| RMSE: | 6.48   | 3.93   | 2.35   |

MAX\_MEAN: 13.2 MAX\_MED: 12.2 BMAD: 0.258

COFF: 0.774 HIT-CALL: 1 FITC: 51 ACTP: 1

FLAGS: 10

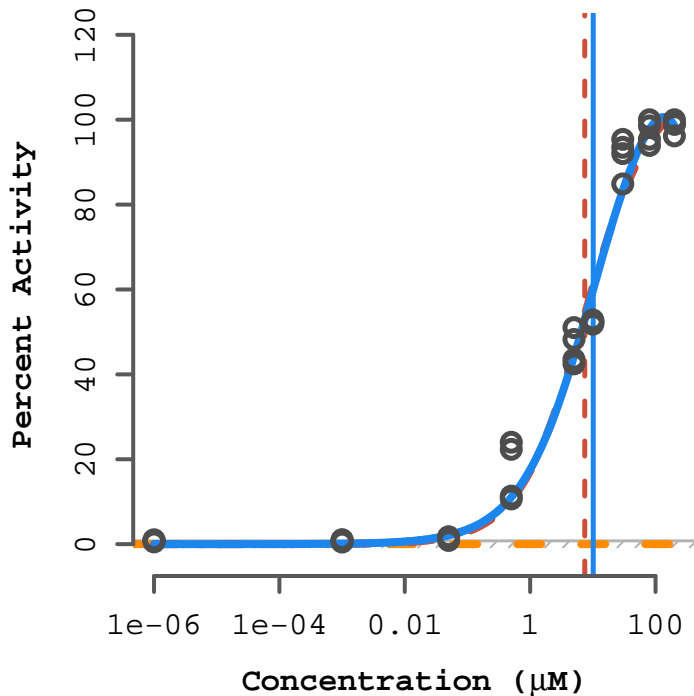

ASSAY: AEID3096 (CCTE\_Deisenroth\_DEVTOX\_RUES2-GLR\_Bra\_

NAME: Sunitinib malate

CHID: 46492 CASRN: 341031-54-7

SPID(S): ES211\_60\_60

M4ID: 42676102

HILL MODEL (in red):

|      |      |        |        |
|------|------|--------|--------|
|      | tp   | ga     | gw     |
| val: | 108  | 0.871  | 0.829  |
| sd:  | 3.88 | 0.0659 | 0.0944 |

GAIN-LOSS MODEL (in blue):

|      |      |       |        |       |      |
|------|------|-------|--------|-------|------|
|      | tp   | ga    | gw     | la    | lw   |
| val: | 120  | 1.01  | 0.761  | 2.78  | 2.04 |
| sd:  | 12.8 | 0.137 | 0.0805 | 0.461 | 2.5  |

|       |        |        |        |
|-------|--------|--------|--------|
|       | CNST   | HILL   | GNLS   |
| AIC:  | 402.64 | 232.51 | 228.05 |
| PROB: | 0      | 0.1    | 0.9    |
| RMSE: | 60.31  | 5.65   | 5.13   |

MAX\_MEAN: 98.5 MAX\_MED: 99 BMAD: 0.258

COFF: 0.774 HIT-CALL: 1 FITC: 51 ACTP: 1

FLAGS: 10
