# Supplementary material for: The DevTox Germ Layer Reporter Platform: An Assay Adaptation of the Human Pluripotent Stem Cell Test
Source: MDPI journal article supplement (doi:10.3390/toxics10070392), 2022-07-13
Supplement: s1 [file s1]

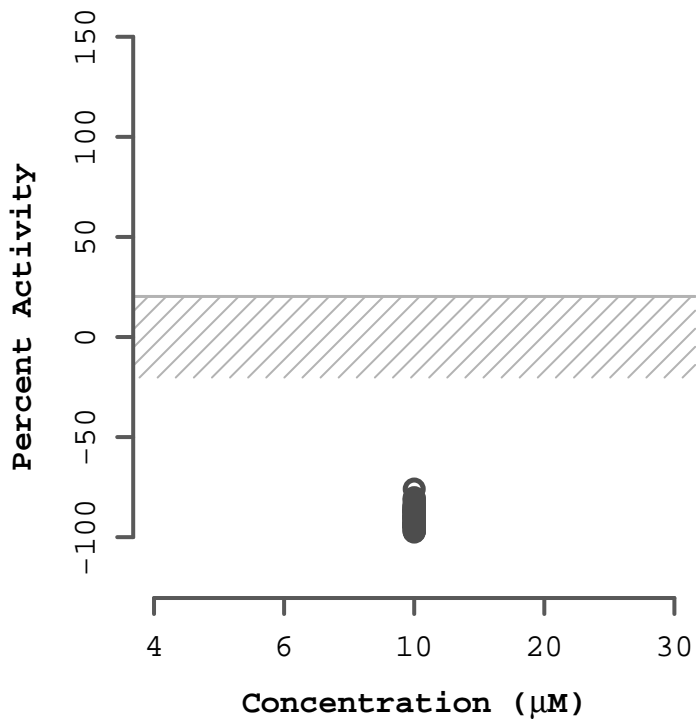

ASSAY: AEID3093 (CCTE\_Deisenroth\_DEVTOX\_RUES2-GLR\_Sox)

NAME: SB-431542

CHID: 42693 CASRN: 301836-41-9

SPID(S): ES211\_56\_56

M4ID: 42675855

HILL MODEL: Not applicable.

GAIN-LOSS MODEL: Not applicable.

|       | CNST | HILL | GNLS |
|-------|------|------|------|
| AIC:  | NA   | NA   | NA   |
| PROB: | NA   | NA   | NA   |
| RMSE: | NA   | NA   | NA   |

MAX\_MEAN: -90 MAX\_MED: -90.4 BMAD: 6.75

COFF: 20.3 HIT-CALL: -1 FITC: 2 ACTP: NA

FLAGS:

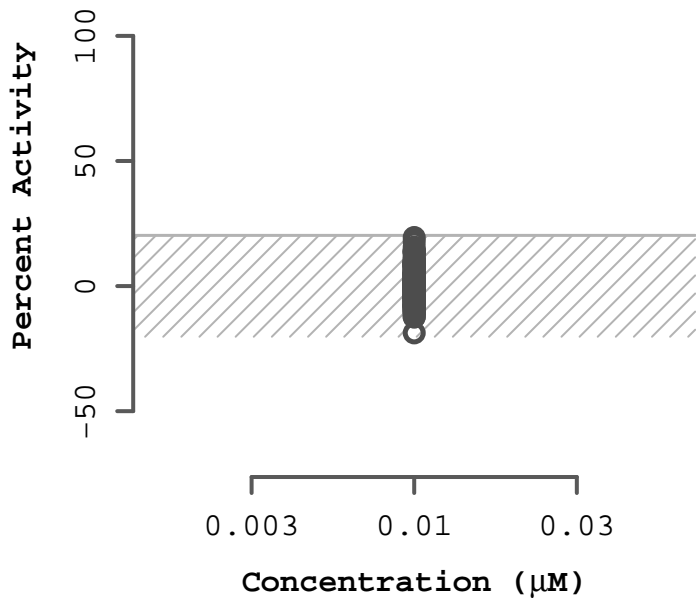

ASSAY: AEID3093 (CCTE\_Deisenroth\_DEVTOX\_RUES2-GLR\_Sox)

NAME: DMSO (spid not in DB)

CHID: NA CASRN: NA

SPID(S): DMSO

M4ID: 42675870

HILL MODEL: Not applicable.

GAIN-LOSS MODEL: Not applicable.

|       | CNST | HILL | GNLS |
|-------|------|------|------|
| AIC:  | NA   | NA   | NA   |
| PROB: | NA   | NA   | NA   |
| RMSE: | NA   | NA   | NA   |

MAX\_MEAN: 0.5 MAX\_MED:  $-5.73\text{e-}15$  BMAD: 6.75

COFF: 20.3 HIT-CALL: -1 FITC: 2 ACTP: NA

FLAGS:

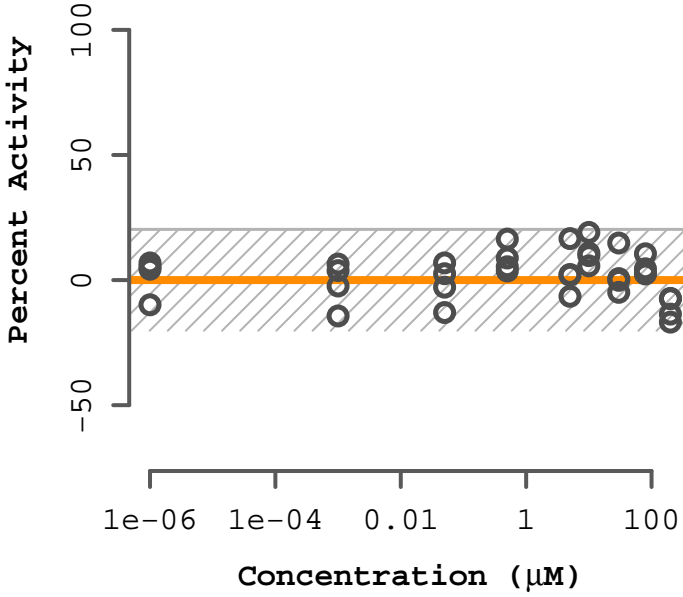

ASSAY: AEID3093 (CCTE\_Deisenroth\_DEVTOX\_RUES2-GLR\_Sox)

NAME: Acetaminophen

CHID: 20006 CASRN: 103-90-2

SPID(S): ES211\_9\_9

M4ID: 42675840

HILL MODEL: Not applicable.

GAIN-LOSS MODEL: Not applicable.

|       |        |      |      |
|-------|--------|------|------|
|       | CNST   | HILL | GNLS |
| AIC:  | 266.51 | NA   | NA   |
| PROB: | 1      | NA   | NA   |
| RMSE: | 9.09   | NA   | NA   |

MAX\_MEAN: 11.3      MAX\_MED: 10.3      BMAD: 6.75

COFF: 20.3      HIT-CALL: 0      FITC: 4      ACTP: 0

FLAGS:

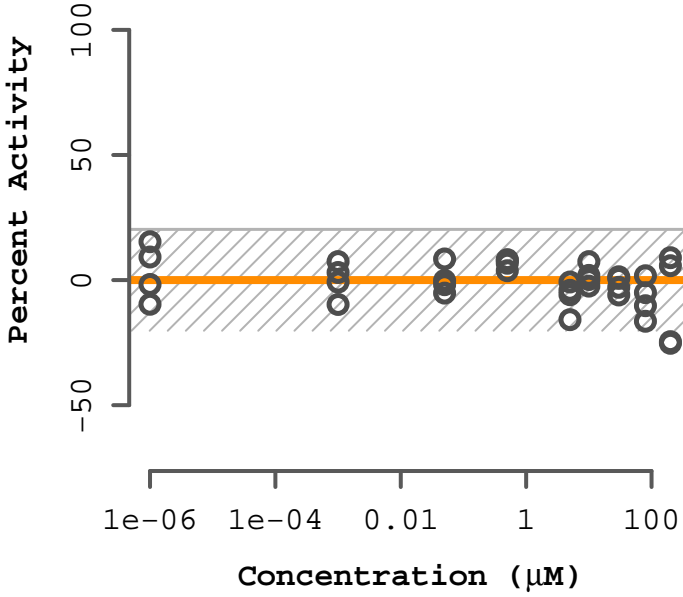

ASSAY: AEID3093 (CCTE\_Deisenroth\_DEVTOX\_RUES2-GLR\_Sox)

NAME: Acrylamide

CHID: 20027 CASRN: 79-06-1

SPID(S): ES211\_10\_10

M4ID: 42675899

HILL MODEL: Not applicable.

GAIN-LOSS MODEL: Not applicable.

|       |        |      |      |
|-------|--------|------|------|
|       | CNST   | HILL | GNLS |
| AIC:  | 262.31 | NA   | NA   |
| PROB: | 1      | NA   | NA   |
| RMSE: | 9.19   | NA   | NA   |

MAX\_MEAN: 6.64 MAX\_MED: 7.31 BMAD: 6.75

COFF: 20.3 HIT-CALL: 0 FITC: 4 ACTP: 0

FLAGS:

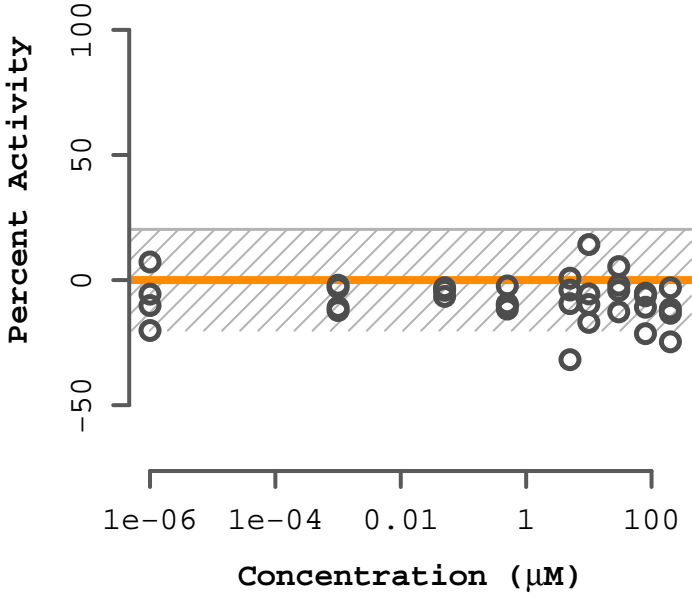

ASSAY: AEID3093 (CCTE\_Deisenroth\_DEVTOX\_RUES2-GLR\_Sox)

NAME: Aspirin

CHID: 20108 CASRN: 50-78-2

SPID(S): ES211\_15\_15

M4ID: 42675837

HILL MODEL: Not applicable.

GAIN-LOSS MODEL: Not applicable.

|       |        |      |      |
|-------|--------|------|------|
|       | CNST   | HILL | GNLS |
| AIC:  | 281.49 | NA   | NA   |
| PROB: | 1      | NA   | NA   |
| RMSE: | 11.54  | NA   | NA   |

MAX\_MEAN: -3.36      MAX\_MED: -3.07      BMAD: 6.75

COFF: 20.3      HIT-CALL: 0      FITC: 4      ACTP: 0

FLAGS:

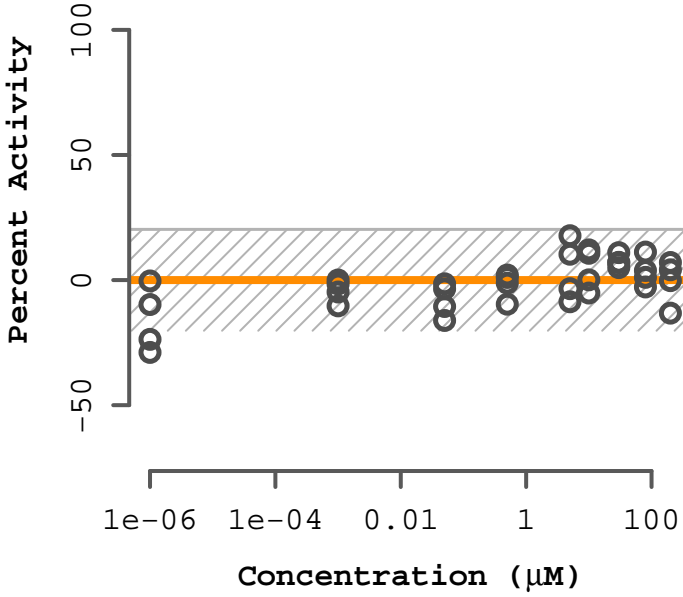

ASSAY: AEID3093 (CCTE\_Deisenroth\_DEVTOX\_RUES2-GLR\_Sox)

NAME: Boric acid (H3BO3)

CHID: 20194 CASRN: 10043-35-3

SPID(S): ES211\_17\_17

M4ID: 42675883

HILL MODEL: Not applicable.

GAIN-LOSS MODEL: Not applicable.

|       | CNST  | HILL | GNLS |
|-------|-------|------|------|
| AIC:  | 268.7 | NA   | NA   |
| PROB: | 1     | NA   | NA   |
| RMSE: | 9.92  | NA   | NA   |

MAX\_MEAN: 7.53      MAX\_MED: 7.06      BMAD: 6.75

COFF: 20.3      HIT-CALL: 0      FITC: 4      ACTP: 0

FLAGS:

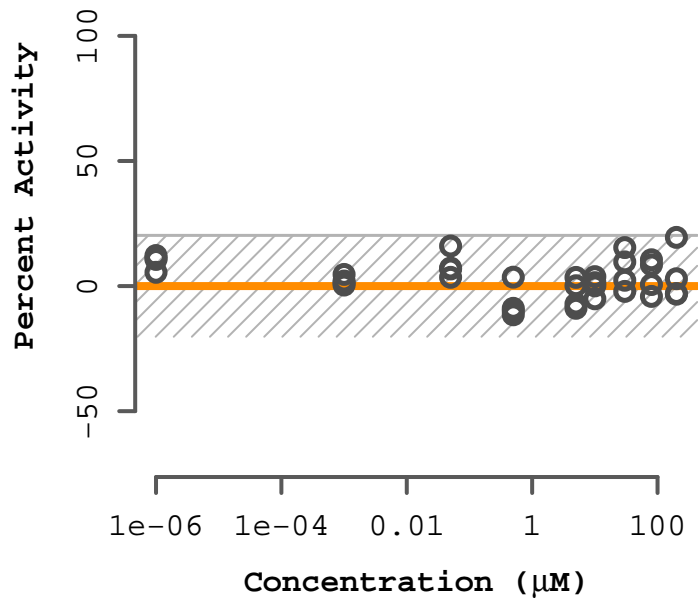

ASSAY: AEID3093 (CCTE\_Deisenroth\_DEVTOX\_RUES2-GLR\_Sox)

**NAME:** Caffeine

CHID: 20232 CASRN: 58-08-2

SPID(S): ES211\_20\_20

**M4ID: 42675867**

HILL MODEL: Not applicable.

**GAIN-LOSS MODEL:** Not applicable.

|       | CNST   | HILL | GNLS |
|-------|--------|------|------|
| AIC:  | 255.63 | NA   | NA   |
| PROB: | 1      | NA   | NA   |
| RMSE: | 7.94   | NA   | NA   |

MAX MEAN: 9.91      MAX MED: 11      BMAD: 6.75

COFF: 20.3 HIT-CALL: 0 FITC: 4 ACTP: 0

**FLAGS :**

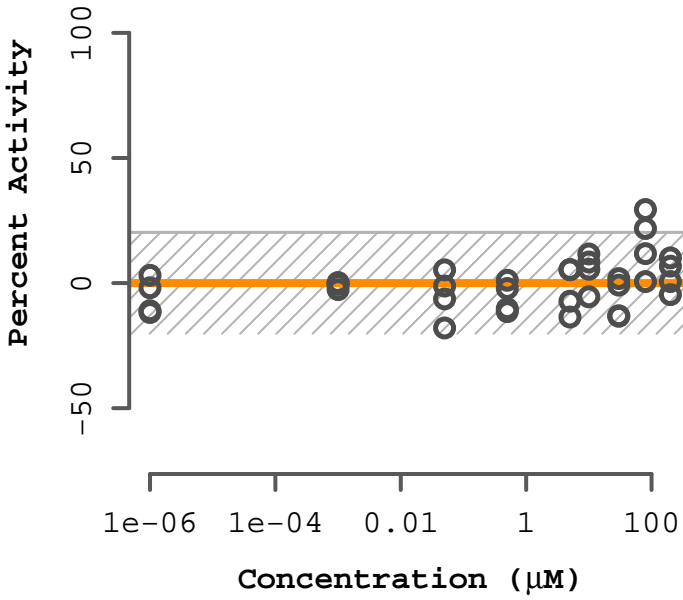

ASSAY: AEID3093 (CCTE\_Deisenroth\_DEVTOX\_RUES2-GLR\_Sox)

NAME: Ethylene glycol  
CHID: 20597 CASRN: 107-21-1  
SPID(S): ES211\_32\_32  
M4ID: 42675871

HILL MODEL: Not applicable.

GAIN-LOSS MODEL: Not applicable.

|       |        |      |      |
|-------|--------|------|------|
|       | CNST   | HILL | GNLS |
| AIC:  | 268.12 | NA   | NA   |
| PROB: | 1      | NA   | NA   |
| RMSE: | 9.82   | NA   | NA   |

|                |               |            |
|----------------|---------------|------------|
| MAX_MEAN: 15.9 | MAX_MED: 16.8 | BMAD: 6.75 |
|----------------|---------------|------------|

|            |             |         |         |
|------------|-------------|---------|---------|
| COFF: 20.3 | HIT-CALL: 0 | FITC: 4 | ACTP: 0 |
|------------|-------------|---------|---------|

FLAGS:



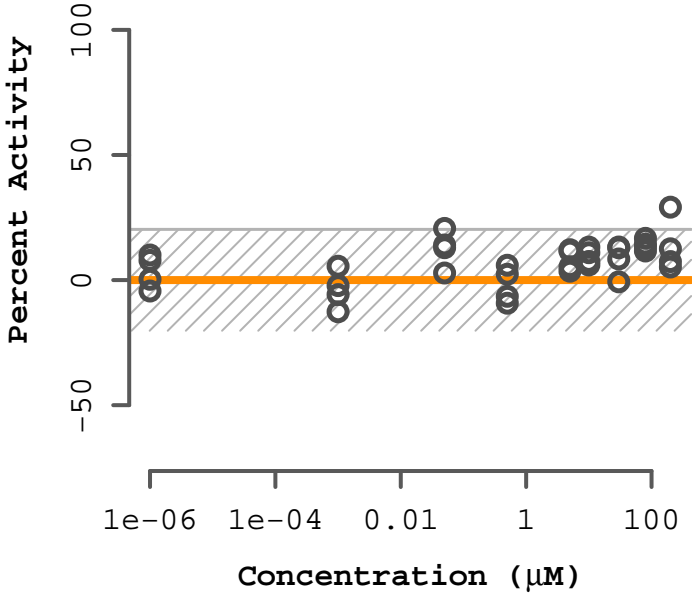

ASSAY: AEID3093 (CCTE\_Deisenroth\_DEVTOX\_RUES2-GLR\_Sox)

NAME: Isoniazid

CHID: 20755 CASRN: 54-85-3

SPID(S): ES211\_39\_39

M4ID: 42675850

HILL MODEL: Not applicable.

GAIN-LOSS MODEL: Not applicable.

|       |        |      |      |
|-------|--------|------|------|
|       | CNST   | HILL | GNLS |
| AIC:  | 280.85 | NA   | NA   |
| PROB: | 1      | NA   | NA   |
| RMSE: | 11.04  | NA   | NA   |

MAX\_MEAN: 14 MAX\_MED: 13.9 BMAD: 6.75

COFF: 20.3 HIT-CALL: 0 FITC: 4 ACTP: 0

FLAGS:

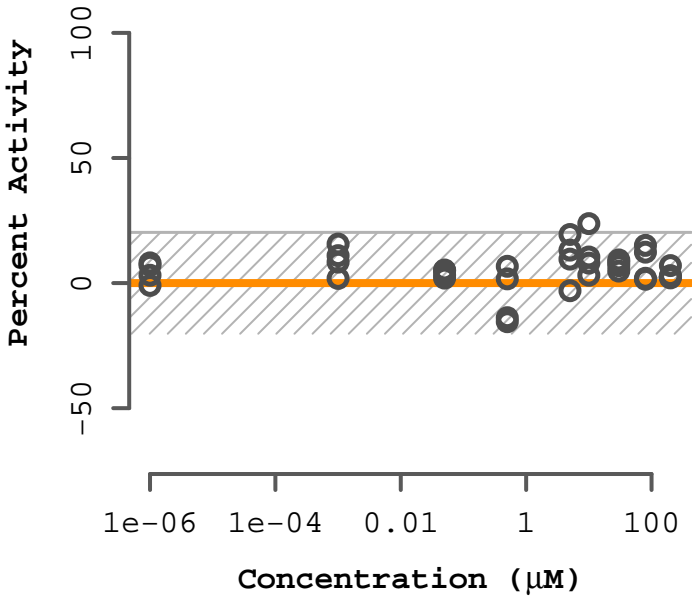

ASSAY: AEID3093 (CCTE\_Deisenroth\_DEVTOX\_RUES2-GLR\_Sox)

NAME: Nicotinic acid  
CHID: 20932 CASRN: 59-67-6  
SPID(S): ES211\_48\_48  
M4ID: 42675842

HILL MODEL: Not applicable.

GAIN-LOSS MODEL: Not applicable.

|       |        |      |      |
|-------|--------|------|------|
|       | CNST   | HILL | GNLS |
| AIC:  | 267.87 | NA   | NA   |
| PROB: | 1      | NA   | NA   |
| RMSE: | 9.41   | NA   | NA   |

MAX\_MEAN: 11.3      MAX\_MED: 11.4      BMAD: 6.75

COFF: 20.3      HIT-CALL: 0      FITC: 4      ACTP: 0

FLAGS:

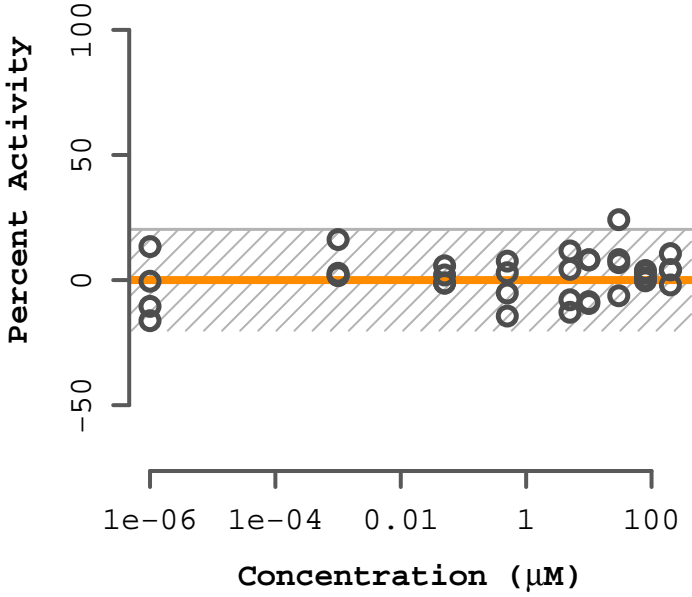

ASSAY: AEID3093 (CCTE\_Deisenroth\_DEVTOX\_RUES2-GLR\_Sox)

NAME: 1,2-Propylene glycol  
CHID: 21206 CASRN: 57-55-6  
SPID(S): ES211\_1\_1  
M4ID: 42675841

HILL MODEL: Not applicable.

GAIN-LOSS MODEL: Not applicable.

|       |        |      |      |
|-------|--------|------|------|
|       | CNST   | HILL | GNLS |
| AIC:  | 261.77 | NA   | NA   |
| PROB: | 1      | NA   | NA   |
| RMSE: | 8.75   | NA   | NA   |

MAX\_MEAN: 8.27      MAX\_MED: 7.58      BMAD: 6.75

COFF: 20.3      HIT-CALL: 0      FITC: 4      ACTP: 0

FLAGS:

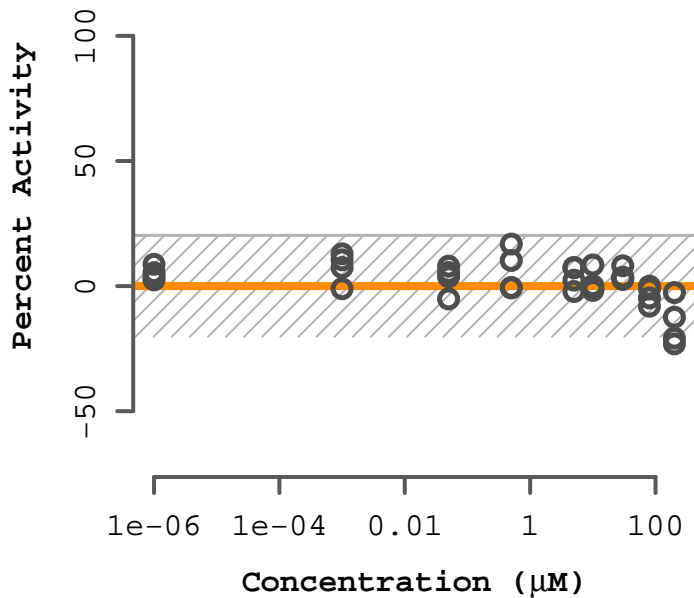

ASSAY: AEID3093 (CCTE\_Deisenroth\_DEVTOX\_RUES2-GLR\_Sox)

NAME: 6-Propyl-2-thiouracil

CHID: 21209 CASRN: 51-52-5

SPID(S): ES211\_8\_8

M4ID: 42675860

HILL MODEL: Not applicable.

GAIN-LOSS MODEL: Not applicable.

|       |        |      |      |
|-------|--------|------|------|
|       | CNST   | HILL | GNLS |
| AIC:  | 255.62 | NA   | NA   |
| PROB: | 1      | NA   | NA   |
| RMSE: | 8.32   | NA   | NA   |

MAX\_MEAN: 7.44 MAX\_MED: 8.97 BMAD: 6.75

COFF: 20.3 HIT-CALL: 0 FITC: 4 ACTP: 0

FLAGS:

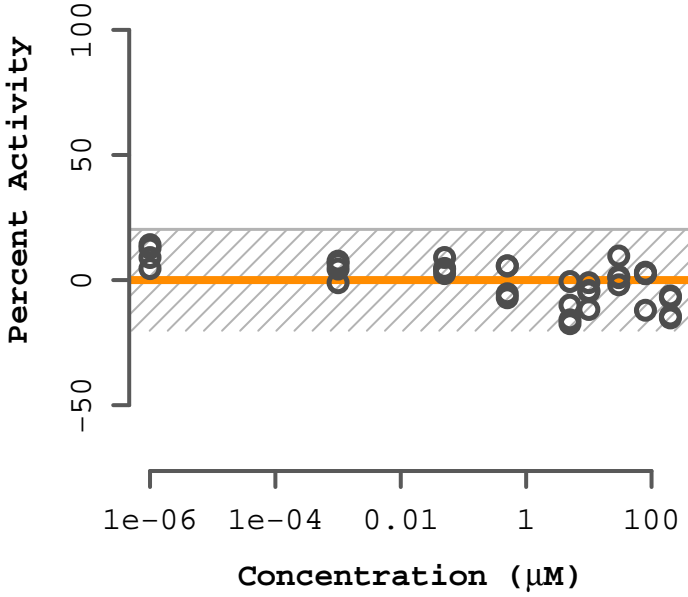

ASSAY: AEID3093 (CCTE\_Deisenroth\_DEVTOX\_RUES2-GLR\_Sox)

NAME: Saccharin

CHID: 21251 CASRN: 81-07-2

SPID(S): ES211\_54\_54

M4ID: 42675881

HILL MODEL: Not applicable.

GAIN-LOSS MODEL: Not applicable.

|       |        |      |      |
|-------|--------|------|------|
|       | CNST   | HILL | GNLS |
| AIC:  | 260.05 | NA   | NA   |
| PROB: | 1      | NA   | NA   |
| RMSE: | 8.31   | NA   | NA   |

MAX\_MEAN: 10.2 MAX\_MED: 10.9 BMAD: 6.75

COFF: 20.3 HIT-CALL: 0 FITC: 4 ACTP: 0

FLAGS:

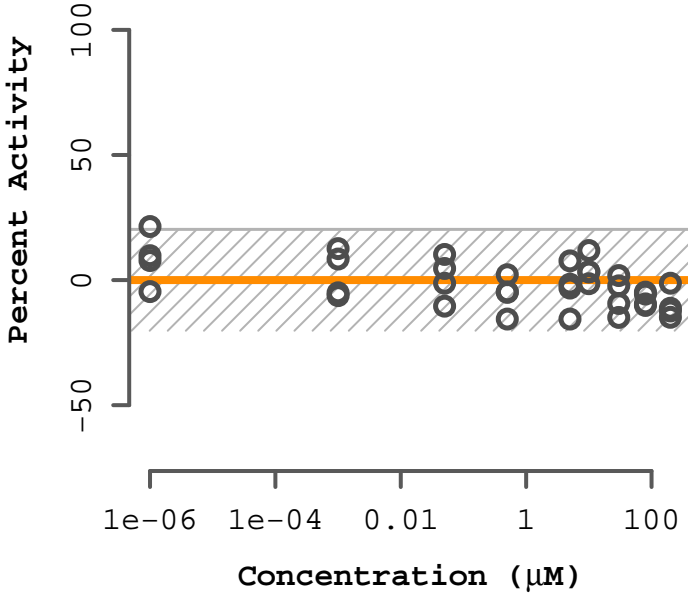

ASSAY: AEID3093 (CCTE\_Deisenroth\_DEVTOX\_RUES2-GLR\_Sox)

NAME: Sulfasalazine  
CHID: 21256 CASRN: 599-79-1  
SPID(S): ES211\_59\_59  
M4ID: 42675897

HILL MODEL: Not applicable.

GAIN-LOSS MODEL: Not applicable.

|       |        |      |      |
|-------|--------|------|------|
|       | CNST   | HILL | GNLS |
| AIC:  | 267.25 | NA   | NA   |
| PROB: | 1      | NA   | NA   |
| RMSE: | 9.14   | NA   | NA   |

MAX\_MEAN: 8.6      MAX\_MED: 8.79      BMAD: 6.75

COFF: 20.3      HIT-CALL: 0      FITC: 4      ACTP: 0

FLAGS:

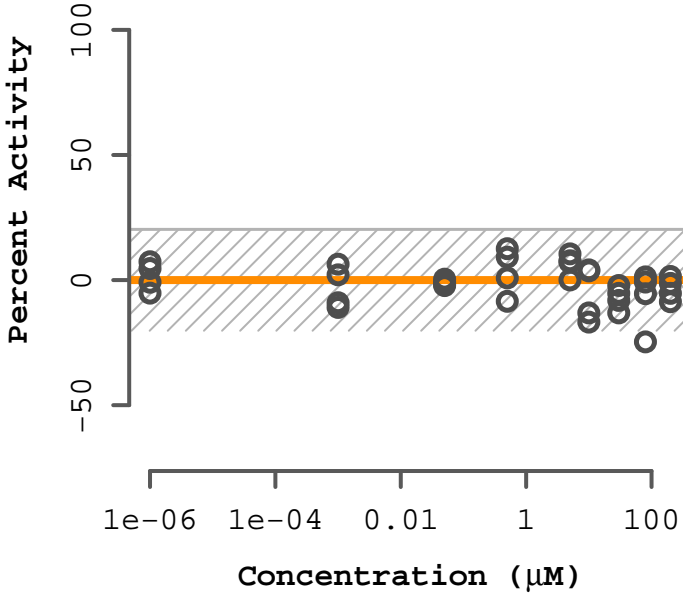

ASSAY: AEID3093 (CCTE\_Deisenroth\_DEVTOX\_RUES2-GLR\_Sox)

NAME: Dimethyl phthalate

CHID: 22455 CASRN: 131-11-3

SPID(S): ES211\_30\_30

M4ID: 42675847

HILL MODEL: Not applicable.

GAIN-LOSS MODEL: Not applicable.

|       |        |      |      |
|-------|--------|------|------|
|       | CNST   | HILL | GNLS |
| AIC:  | 255.23 | NA   | NA   |
| PROB: | 1      | NA   | NA   |
| RMSE: | 8.16   | NA   | NA   |

MAX\_MEAN: 6.35      MAX\_MED: 7.43      BMAD: 6.75

COFF: 20.3      HIT-CALL: 0      FITC: 4      ACTP: 0

FLAGS:

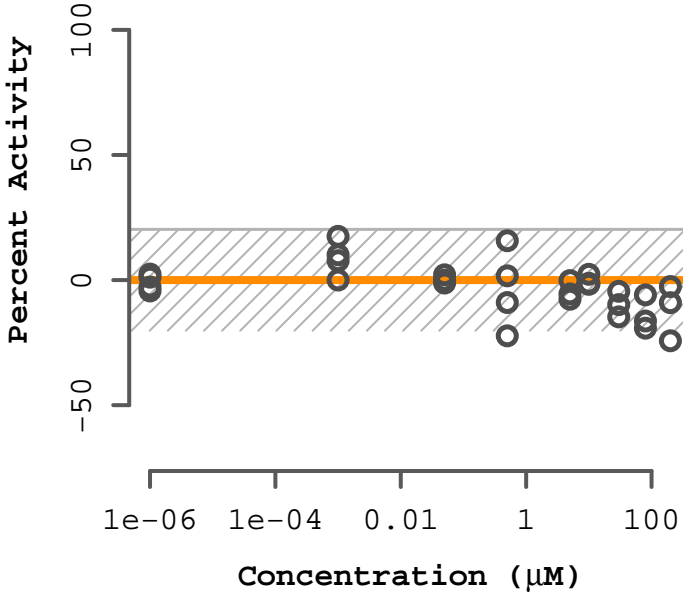

ASSAY: AEID3093 (CCTE\_Deisenroth\_DEVTOX\_RUES2-GLR\_Sox)

NAME: Folic acid

CHID: 22519 CASRN: 59-30-3

SPID(S): ES211\_33\_33

M4ID: 42675891

HILL MODEL: Not applicable.

GAIN-LOSS MODEL: Not applicable.

|       |        |      |      |
|-------|--------|------|------|
|       | CNST   | HILL | GNLS |
| AIC:  | 232.24 | NA   | NA   |
| PROB: | 1      | NA   | NA   |
| RMSE: | 10.02  | NA   | NA   |

MAX\_MEAN: 8.84 MAX\_MED: 8.92 BMAD: 6.75

COFF: 20.3 HIT-CALL: 0 FITC: 4 ACTP: 0

FLAGS:



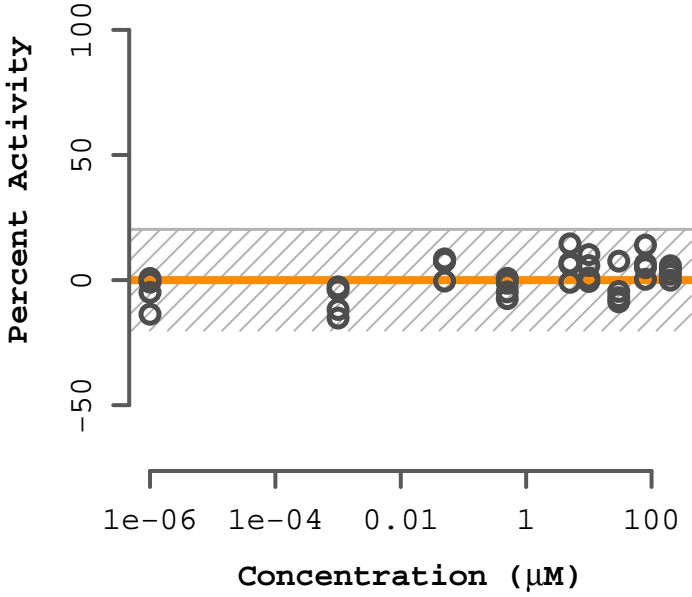

ASSAY: AEID3093 (CCTE\_Deisenroth\_DEVTOX\_RUES2-GLR\_Sox)

NAME: Acyclovir  
CHID: 22556 CASRN: 59277-89-3  
SPID(S): ES211\_12\_12  
M4ID: 42675852

HILL MODEL: Not applicable.

GAIN-LOSS MODEL: Not applicable.

|       |       |      |      |
|-------|-------|------|------|
|       | CNST  | HILL | GNLS |
| AIC:  | 248.4 | NA   | NA   |
| PROB: | 1     | NA   | NA   |
| RMSE: | 7.13  | NA   | NA   |

MAX\_MEAN: 6.68      MAX\_MED: 7.67      BMAD: 6.75

COFF: 20.3      HIT-CALL: 0      FITC: 4      ACTP: 0

FLAGS:

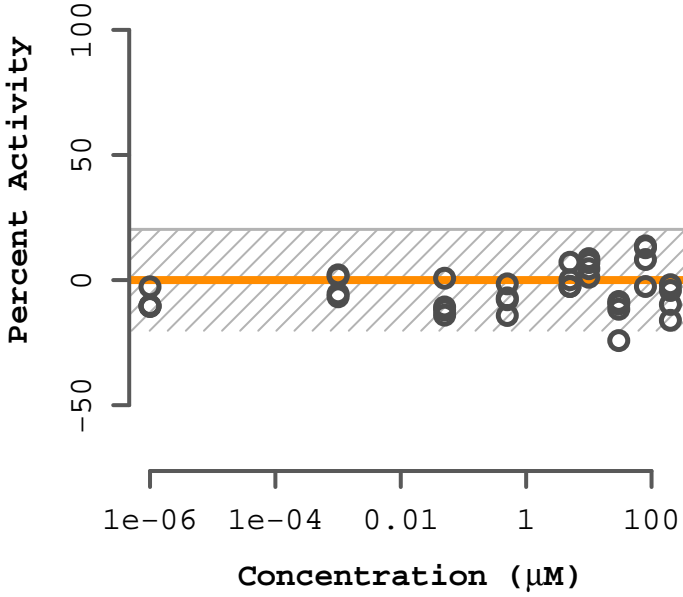

ASSAY: AEID3093 (CCTE\_Deisenroth\_DEVTOX\_RUES2-GLR\_Sox)

NAME: Stavudine

CHID: 23819 CASRN: 3056-17-5

SPID(S): ES211\_58\_58

M4ID: 42675890

HILL MODEL: Not applicable.

GAIN-LOSS MODEL: Not applicable.

|       |        |      |      |
|-------|--------|------|------|
|       | CNST   | HILL | GNLS |
| AIC:  | 267.68 | NA   | NA   |
| PROB: | 1      | NA   | NA   |
| RMSE: | 9.25   | NA   | NA   |

MAX\_MEAN: 8.07 MAX\_MED: 10.6 BMAD: 6.75

COFF: 20.3 HIT-CALL: 0 FITC: 4 ACTP: 0

FLAGS:

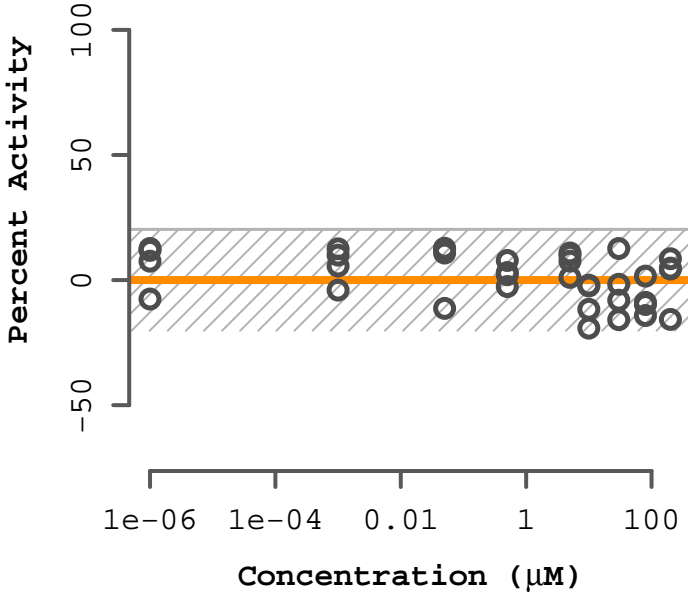

ASSAY: AEID3093 (CCTE\_Deisenroth\_DEVTOX\_RUES2-GLR\_Sox)

NAME: D-Camphor

CHID: 24721 CASRN: 464-49-3

SPID(S): ES211\_27\_27

M4ID: 42675884

HILL MODEL: Not applicable.

GAIN-LOSS MODEL: Not applicable.

|       |        |      |      |
|-------|--------|------|------|
|       | CNST   | HILL | GNLS |
| AIC:  | 273.16 | NA   | NA   |
| PROB: | 1      | NA   | NA   |
| RMSE: | 9.67   | NA   | NA   |

MAX\_MEAN: 7.36      MAX\_MED: 11.6      BMAD: 6.75

COFF: 20.3      HIT-CALL: 0      FITC: 4      ACTP: 0

FLAGS:

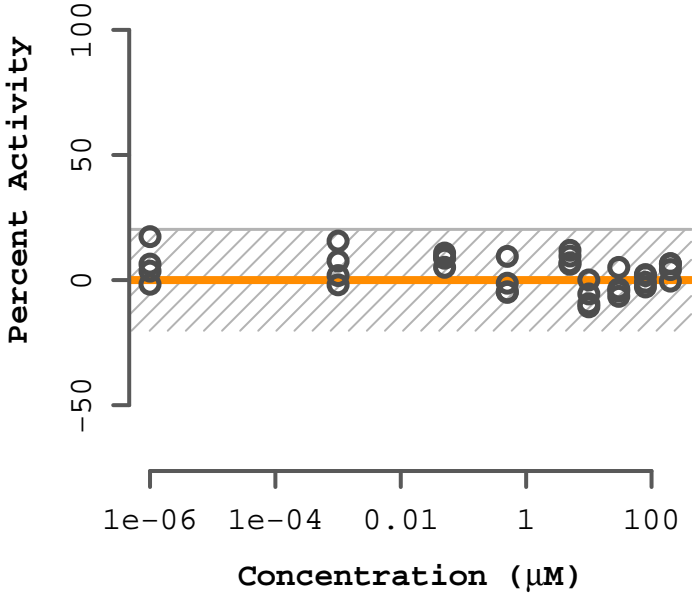

ASSAY: AEID3093 (CCTE\_Deisenroth\_DEVTOX\_RUES2-GLR\_Sox)

NAME: Cyclophosphamide monohydrate

CHID: 24888 CASRN: 6055-19-2

SPID(S): ES211\_24\_24

M4ID: 42675863

HILL MODEL: Not applicable.

GAIN-LOSS MODEL: Not applicable.

|       | CNST   | HILL | GNLS |
|-------|--------|------|------|
| AIC:  | 249.82 | NA   | NA   |
| PROB: | 1      | NA   | NA   |
| RMSE: | 7.23   | NA   | NA   |

|                |               |            |
|----------------|---------------|------------|
| MAX_MEAN: 8.69 | MAX_MED: 8.98 | BMAD: 6.75 |
|----------------|---------------|------------|

|            |             |         |         |
|------------|-------------|---------|---------|
| COFF: 20.3 | HIT-CALL: 0 | FITC: 4 | ACTP: 0 |
|------------|-------------|---------|---------|

FLAGS:

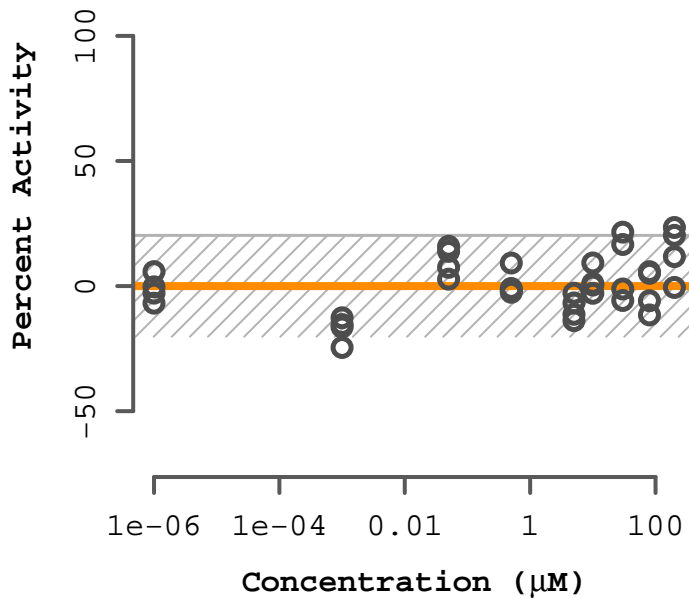

ASSAY: AEID3093 (CCTE\_Deisenroth\_DEVTOX\_RUES2-GLR\_Sox)

NAME: Hydroxyurea

CHID: 25438 CASRN: 127-07-1

SPID(S): ES211\_35\_35

M4ID: 42675845

HILL MODEL: Not applicable.

GAIN-LOSS MODEL: Not applicable.

|       |               |      |      |
|-------|---------------|------|------|
|       | <b>CNST</b>   | HILL | GNLS |
| AIC:  | <b>280.55</b> | NA   | NA   |
| PROB: | <b>1</b>      | NA   | NA   |
| RMSE: | <b>11.22</b>  | NA   | NA   |

MAX\_MEAN: 13.7 MAX\_MED: 16 BMAD: 6.75

COFF: 20.3 HIT-CALL: 0 FITC: 4 ACTP: 0

FLAGS:

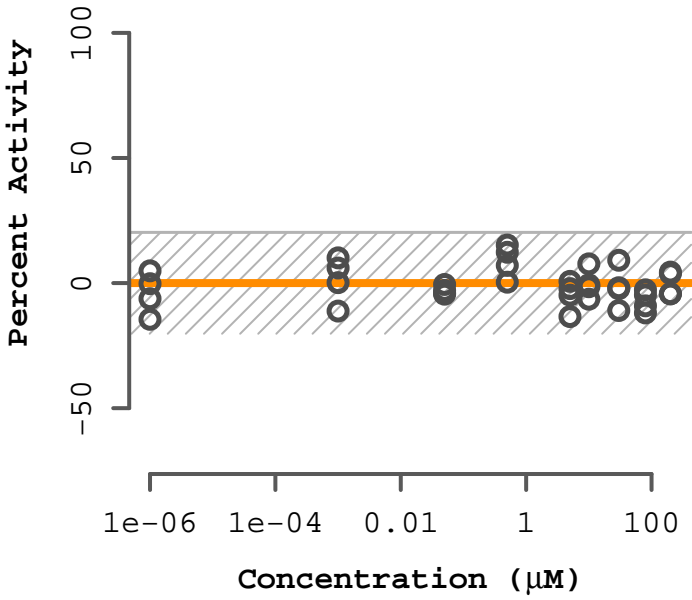

ASSAY: AEID3093 (CCTE\_Deisenroth\_DEVTOX\_RUES2-GLR\_Sox)

NAME: Salicylic acid  
CHID: 26368 CASRN: 69-72-7  
SPID(S): ES211\_55\_55  
M4ID: 42675879

HILL MODEL: Not applicable.

GAIN-LOSS MODEL: Not applicable.

|       |        |      |      |
|-------|--------|------|------|
|       | CNST   | HILL | GNLS |
| AIC:  | 248.94 | NA   | NA   |
| PROB: | 1      | NA   | NA   |
| RMSE: | 7.19   | NA   | NA   |

MAX\_MEAN: 8.74 MAX\_MED: 9.69 BMAD: 6.75

COFF: 20.3 HIT-CALL: 0 FITC: 4 ACTP: 0

FLAGS:

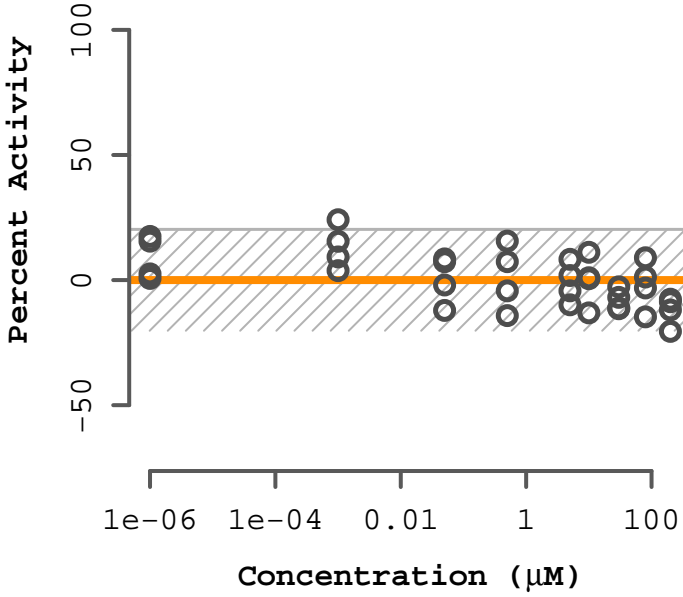

ASSAY: AEID3093 (CCTE\_Deisenroth\_DEVTOX\_RUES2-GLR\_Sox)

NAME: Penicillin G potassium  
CHID: 45106 CASRN: 113-98-4  
SPID(S): ES211\_49\_49  
M4ID: 42675894

HILL MODEL: Not applicable.

GAIN-LOSS MODEL: Not applicable.

|       |        |      |      |
|-------|--------|------|------|
|       | CNST   | HILL | GNLS |
| AIC:  | 278.39 | NA   | NA   |
| PROB: | 1      | NA   | NA   |
| RMSE: | 10.63  | NA   | NA   |

MAX\_MEAN: 13.2 MAX\_MED: 12.4 BMAD: 6.75

COFF: 20.3 HIT-CALL: 0 FITC: 4 ACTP: 0

FLAGS:

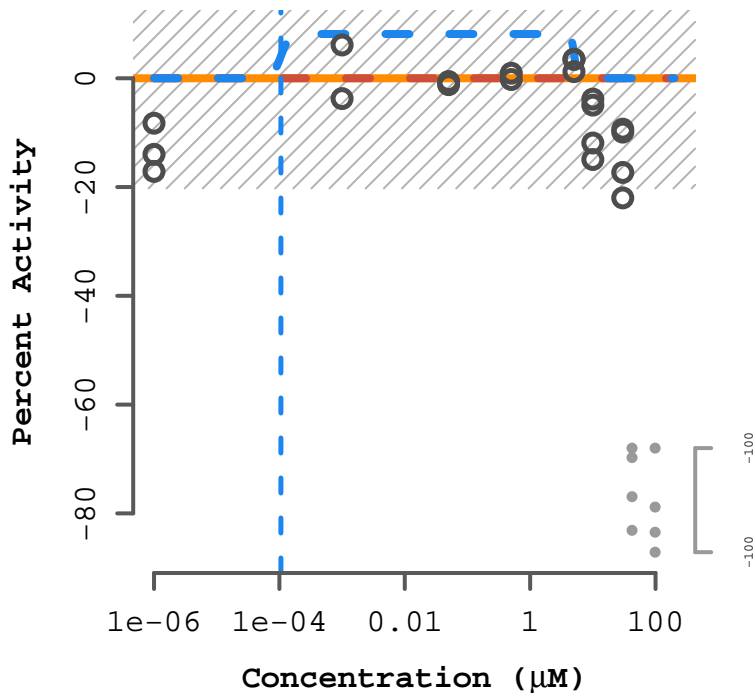

ASSAY: AEID3093 (CCTE\_Deisenroth\_DEVTOX\_RUES2-GLR\_Sox)

NAME: Bisphenol A

CHID: 20182 CASRN: 80-05-7

SPID(S): ES211\_16\_16

M4ID: 42675846 BRK

HILL MODEL (in red):

|      | tp    | ga  | gw   |
|------|-------|-----|------|
| val: | 0.853 | 2.8 | 7.98 |
| sd:  | NaN   | NaN | NaN  |

GAIN-LOSS MODEL (in blue):

|      | tp   | ga    | gw   | la    | lw   |
|------|------|-------|------|-------|------|
| val: | 8.14 | -3.98 | 6.59 | 0.705 | 17.4 |
| sd:  | 7.31 | 994   | 6710 | 0.319 | 757  |

|       | CNST   | HILL   | GNLS  |
|-------|--------|--------|-------|
| AIC:  | 377.01 | 383.01 | 385.7 |
| PROB: | 0.94   | 0.05   | 0.01  |
| RMSE: | 49.11  | 49.11  | 48.86 |

MAX\_MEAN: 9.9 MAX\_MED: 10.7 BMAD: 6.75

COFF: 20.3 HIT-CALL: 0 FITC: 7 ACTP: 0.06

FLAGS: 10



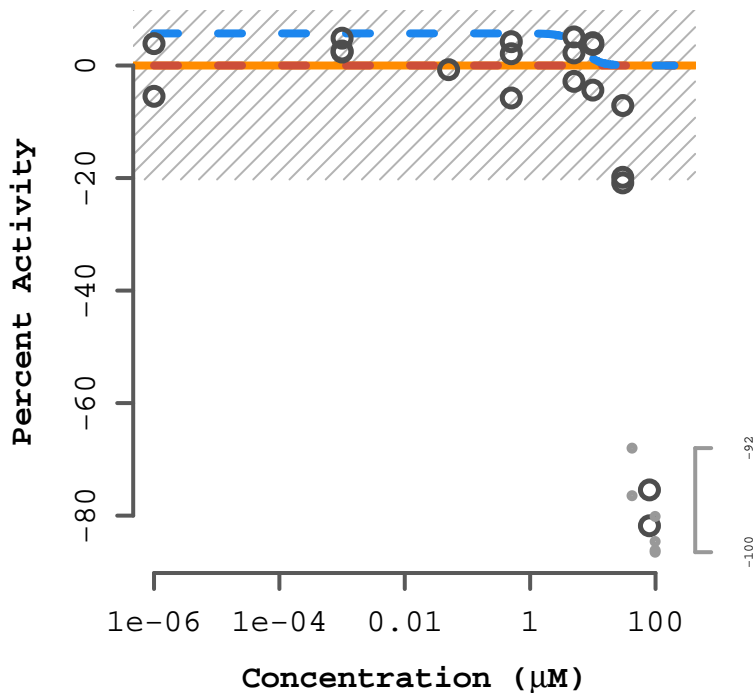

ASSAY: AEID3093 (CCTE\_Deisenroth\_DEVTOX\_RUES2-GLR\_Sox)

NAME: 4-Hydroxybenzoic acid butyl ester

CHID: 20209 CASRN: 94-26-8

SPID(S): ES211\_19\_19

M4ID: 42675858 BRK

HILL MODEL (in red):

|      | tp       | ga   | gw   |
|------|----------|------|------|
| val: | 1.87e-05 | 2.79 | 4.58 |
| sd:  | NaN      | NaN  | NaN  |

GAIN-LOSS MODEL (in blue):

|      | tp   | ga    | gw   | la    | lw   |
|------|------|-------|------|-------|------|
| val: | 5.71 | -6.54 | 7.75 | 0.827 | 3.21 |
| sd:  | NaN  | NaN   | NaN  | NaN   | NaN  |

|       | CNST   | HILL   | GNLS   |
|-------|--------|--------|--------|
| AIC:  | 369.23 | 375.23 | 377.98 |
| PROB: | 0.94   | 0.05   | 0.01   |
| RMSE: | 45.27  | 45.27  | 45.09  |

MAX\_MEAN: 8.67 MAX\_MED: 10.2 BMAD: 6.75

COFF: 20.3 HIT-CALL: 0 FITC: 7 ACTP: 0.06

FLAGS: 10

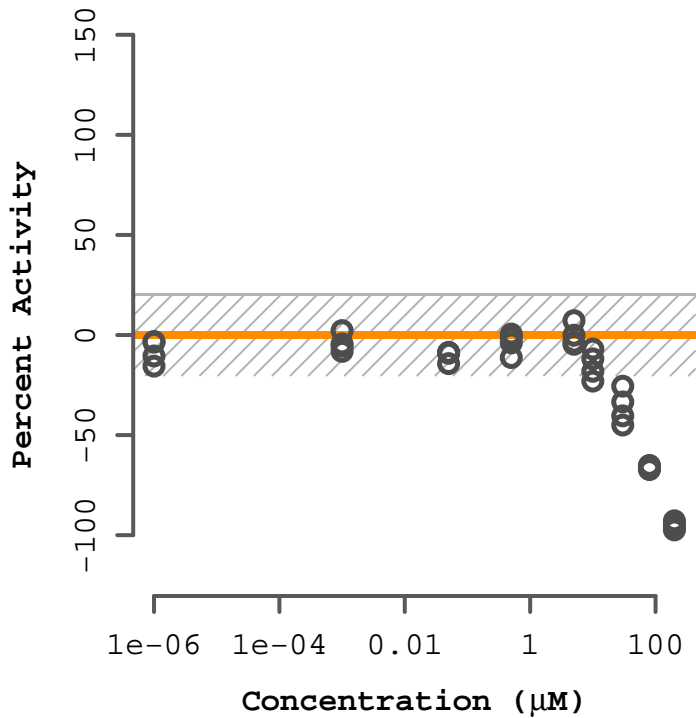

ASSAY: AEID3093 (CCTE\_Deisenroth\_DEVTOX\_RUES2-GLR\_Sox)

NAME: Diphenhydramine hydrochloride

CHID: 20537 CASRN: 147-24-0

SPID(S): ES211\_31\_31

M4ID: 42675880

HILL MODEL: Failed to converge.

GAIN-LOSS MODEL: Failed to converge.

|       |        |      |      |
|-------|--------|------|------|
|       | CNST   | HILL | GNLS |
| AIC:  | 367.59 | NA   | NA   |
| PROB: | 1      | NA   | NA   |
| RMSE: | 41.28  | NA   | NA   |

MAX\_MEAN: -0.267 MAX\_MED: -1.82 BMAD: 6.75

COFF: 20.3 HIT-CALL: 0 FITC: 7 ACTP: 0

FLAGS: 10

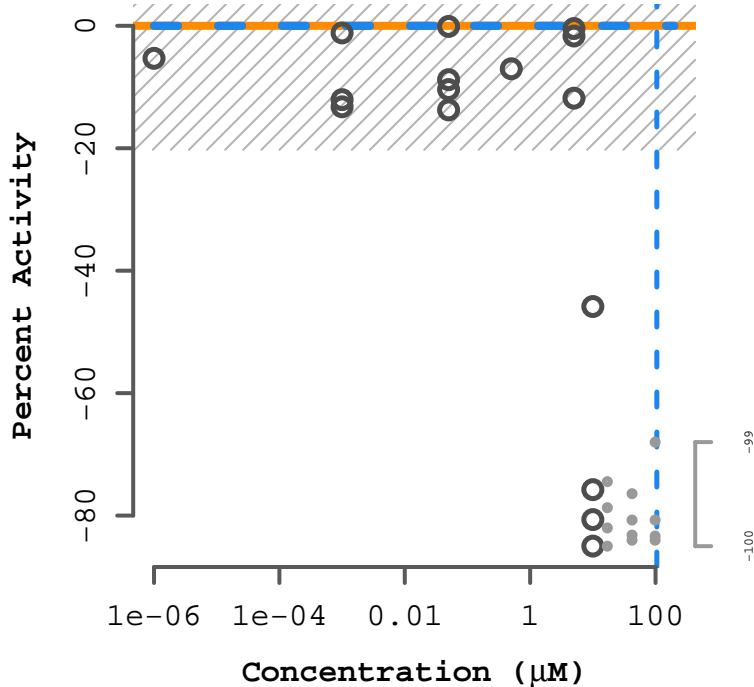

ASSAY: AEID3093 (CCTE\_Deisenroth\_DEVTOX\_RUES2-GLR\_Sox)

NAME: 5-Fluorouracil

CHID: 20634 CASRN: 51-21-8

SPID(S): ES211\_5\_5

M4ID: 42675878 BRK

HILL MODEL (in red):

|      | tp       | ga   | gw   |
|------|----------|------|------|
| val: | 1.77e-07 | 2.77 | 2.94 |
| sd:  | NaN      | NaN  | NaN  |

GAIN-LOSS MODEL (in blue):

|      | tp       | ga   | gw     | la   | lw     |
|------|----------|------|--------|------|--------|
| val: | 9.09e-09 | 2.02 | 7.97   | 2.28 | 12.3   |
| sd:  | 0.000332 | 7900 | 330000 | 1800 | 673000 |

|       | CNST   | HILL   | GNLS   |
|-------|--------|--------|--------|
| AIC:  | 405.86 | 411.86 | 415.86 |
| PROB: | 0.95   | 0.05   | 0.01   |
| RMSE: | 63.9   | 63.9   | 63.9   |

MAX\_MEAN: 3.38 MAX\_MED: 4.48 BMAD: 6.75

COFF: 20.3 HIT-CALL: 0 FITC: 7 ACTP: 0.05

FLAGS: 10

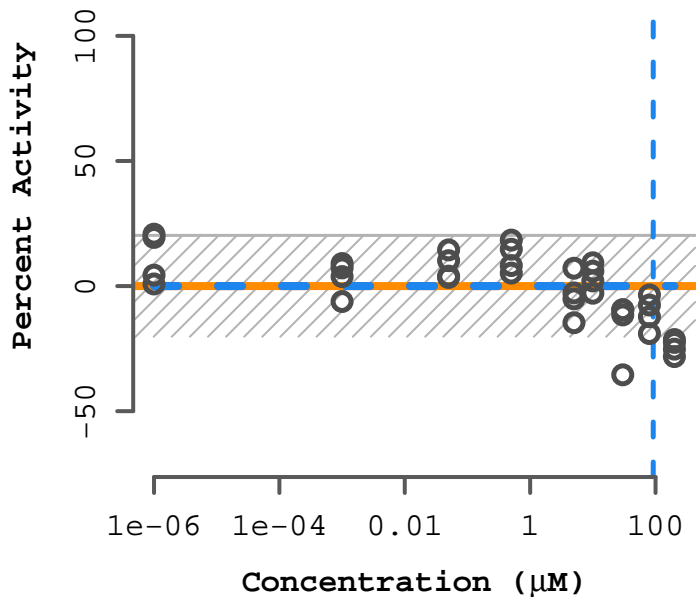

ASSAY: AEID3093 (CCTE\_Deisenroth\_DEVTOX\_RUES2-GLR\_Sox)

NAME: Ibuprofen

CHID: 20732 CASRN: 15687-27-1

SPID(S): ES211\_36\_36

M4ID: 42675896

HILL MODEL (in red):

|      | tp   | ga   | gw   |
|------|------|------|------|
| val: | 0.24 | 2.79 | 7.99 |
| sd:  | NaN  | NaN  | NaN  |

GAIN-LOSS MODEL (in blue):

|      | tp       | ga   | gw    | la   | lw     |
|------|----------|------|-------|------|--------|
| val: | 5.18e-08 | 1.96 | 5.73  | 2.22 | 13.9   |
| sd:  | 0.000318 | 1030 | 85000 | 1100 | 185000 |

|       | CNST   | HILL   | GNLS   |
|-------|--------|--------|--------|
| AIC:  | 295.77 | 301.77 | 305.77 |
| PROB: | 0.95   | 0.05   | 0.01   |
| RMSE: | 13.92  | 13.92  | 13.92  |

MAX\_MEAN: 11.6 MAX\_MED: 11.9 BMAD: 6.75

COFF: 20.3 HIT-CALL: 0 FITC: 7 ACTP: 0.05

FLAGS:

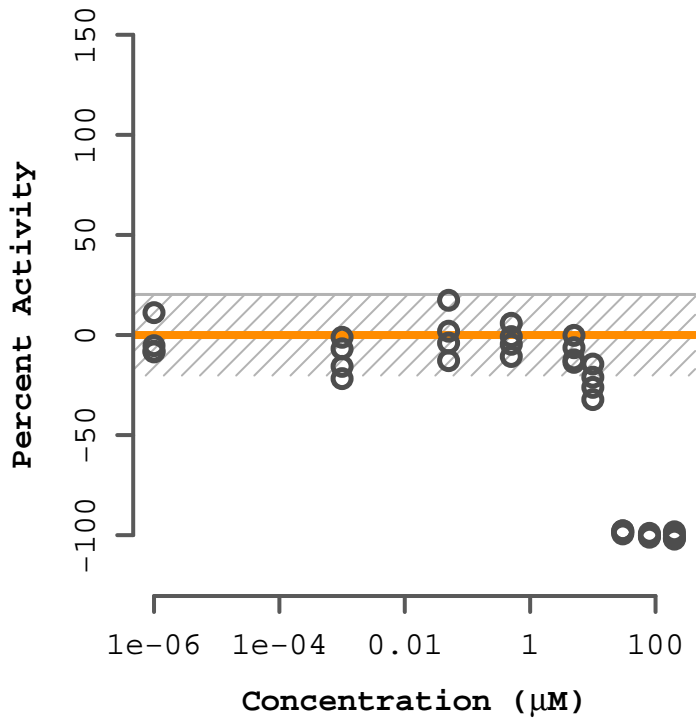

ASSAY: AEID3093 (CCTE\_Deisenroth\_DEVTOX\_RUES2-GLR\_Sox)

NAME: 1-(p-Chlorobenzoyl)-5-methoxy-2-methyl-Indole-

CHID: 20740 CASRN: 53-86-1

SPID(S): ES211\_38\_38

M4ID: 42675889

HILL MODEL: Failed to converge.

GAIN-LOSS MODEL: Failed to converge.

|       |        |      |      |
|-------|--------|------|------|
|       | CNST   | HILL | GNLS |
| AIC:  | 397.37 | NA   | NA   |
| PROB: | 1      | NA   | NA   |
| RMSE: | 58.6   | NA   | NA   |

MAX\_MEAN: 0.625 MAX\_MED: -1.03 BMAD: 6.75

COFF: 20.3 HIT-CALL: 0 FITC: 7 ACTP: 0

FLAGS: 10

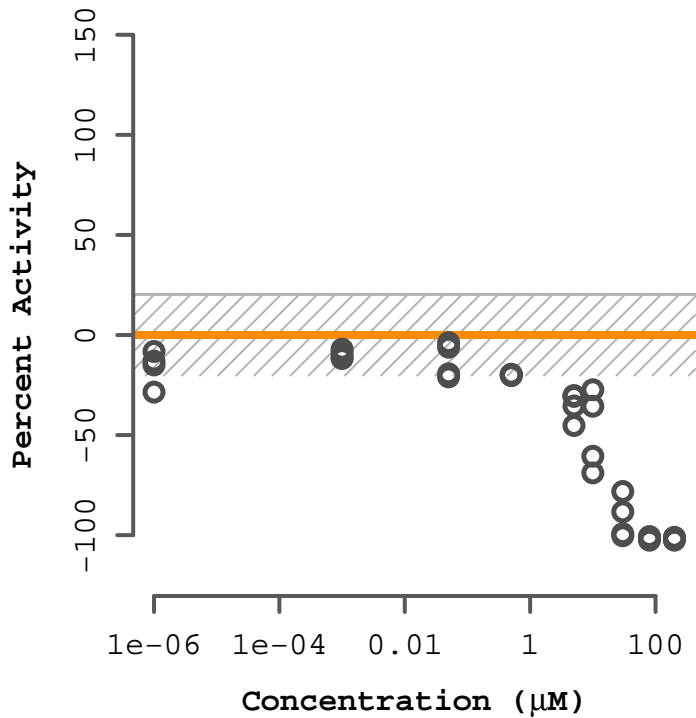

ASSAY: AEID3093 (CCTE\_Deisenroth\_DEVTOX\_RUES2-GLR\_Sox)

NAME: Lovastatin

CHID: 20784 CASRN: 75330-75-5

SPID(S): ES211\_42\_42

M4ID: 42675853

HILL MODEL: Failed to converge.

GAIN-LOSS MODEL: Failed to converge.

|       |        |      |      |
|-------|--------|------|------|
|       | CNST   | HILL | GNLS |
| AIC:  | 403.65 | NA   | NA   |
| PROB: | 1      | NA   | NA   |
| RMSE: | 61.47  | NA   | NA   |

MAX\_MEAN: -9.76 MAX\_MED: -10.1 BMAD: 6.75

COFF: 20.3 HIT-CALL: 0 FITC: 7 ACTP: 0

FLAGS: 10

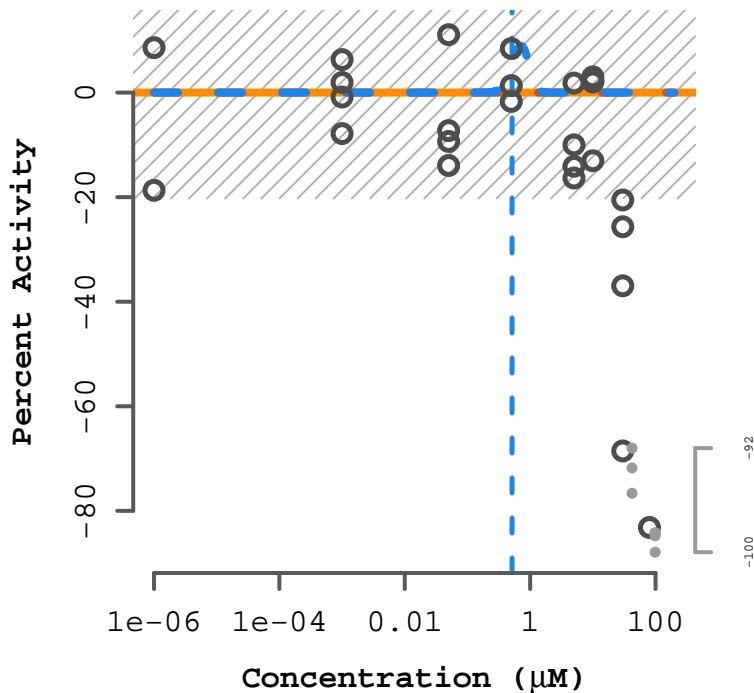

ASSAY: AEID3093 (CCTE\_Deisenroth\_DEVTOX\_RUES2-GLR\_Sox)

NAME: Busulfan

CHID: 20910 CASRN: 55-98-1

SPID(S): ES211\_18\_18

M4ID: 42675864 BRK

HILL MODEL (in red):

|      | tp    | ga  | gw   |
|------|-------|-----|------|
| val: | 0.298 | 2.8 | 7.93 |
| sd:  | NaN   | NaN | NaN  |

GAIN-LOSS MODEL (in blue):

|      | tp   | ga     | gw   | la      | lw   |
|------|------|--------|------|---------|------|
| val: | 11.1 | -0.289 | 6.04 | -0.0228 | 8.54 |
| sd:  | 2520 | 33.8   | 2030 | 92.6    | 1290 |

|       | CNST   | HILL   | GNLS   |
|-------|--------|--------|--------|
| AIC:  | 378.91 | 384.91 | 388.79 |
| PROB: | 0.95   | 0.05   | 0.01   |
| RMSE: | 48.2   | 48.2   | 48.17  |

MAX\_MEAN: 7.27 MAX\_MED: 12.6 BMAD: 6.75

COFF: 20.3 HIT-CALL: 0 FITC: 7 ACTP: 0.05

FLAGS: 10

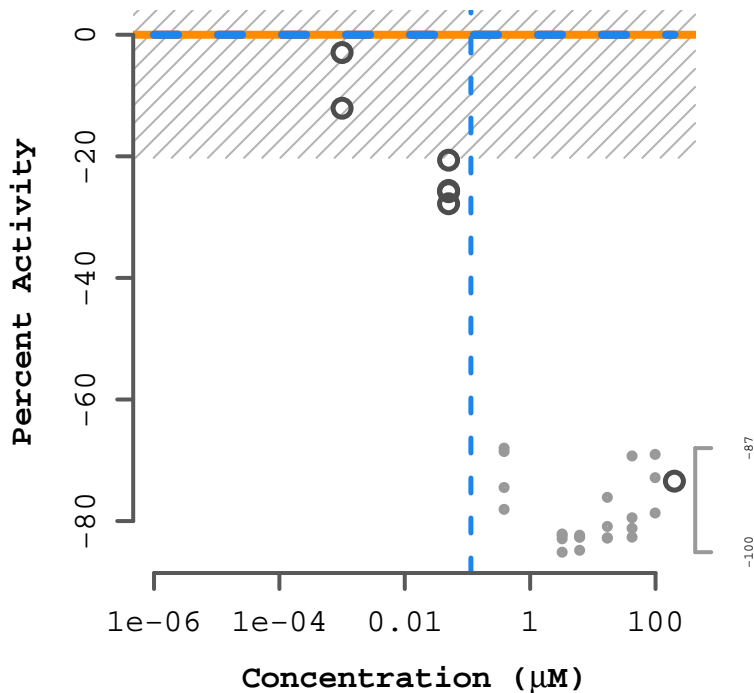

ASSAY: AEID3093 (CCTE\_Deisenroth\_DEVTOX\_RUES2-GLR\_Sox)

NAME: all-trans-Retinoic acid

CHID: 21239 CASRN: 302-79-4

SPID(S): ES211\_13\_13

M4ID: 42675895 BRK

HILL MODEL (in red):

|      | tp    | ga  | gw   |
|------|-------|-----|------|
| val: | 0.462 | 2.8 | 7.79 |
| sd:  | NaN   | NaN | NaN  |

GAIN-LOSS MODEL (in blue):

|      | tp      | ga     | gw   | la     | lw   |
|------|---------|--------|------|--------|------|
| val: | 0.00531 | -0.945 | 5.84 | -0.695 | 7.49 |
| sd:  | NaN     | NaN    | NaN  | NaN    | NaN  |

|       | CNST   | HILL   | GNLS   |
|-------|--------|--------|--------|
| AIC:  | 425.46 | 431.46 | 435.46 |
| PROB: | 0.95   | 0.05   | 0.01   |
| RMSE: | 79.17  | 79.17  | 79.17  |

MAX\_MEAN: 4.3 MAX\_MED: 3.82 BMAD: 6.75

COFF: 20.3 HIT-CALL: 0 FITC: 7 ACTP: 0.05

FLAGS: 10



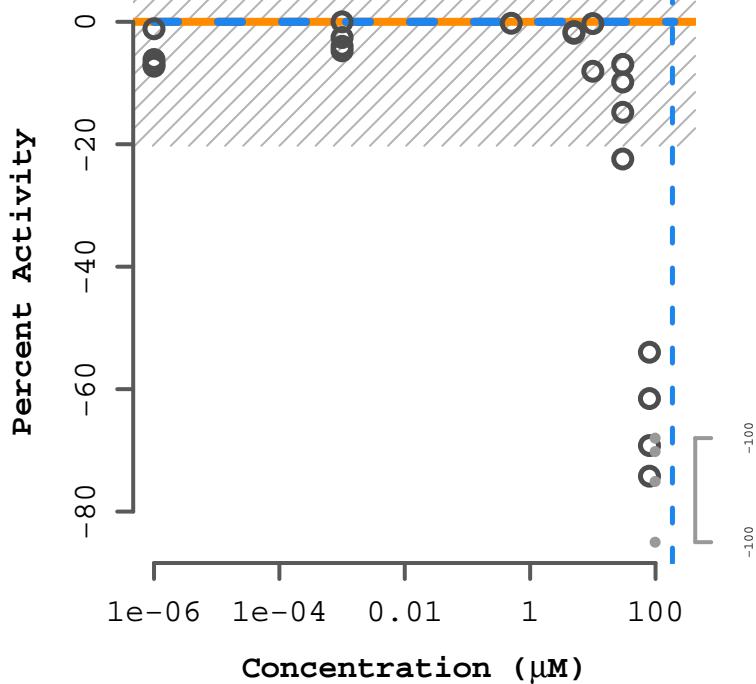

ASSAY: AEID3093 (CCTE\_Deisenroth\_DEVTOX\_RUES2-GLR\_Sox)

NAME: Rifampicin

CHID: 21244 CASRN: 13292-46-1

SPID(S): ES211\_52\_52

M4ID: 42675885 BRK

HILL MODEL (in red):

|      |          |      |      |
|------|----------|------|------|
|      | tp       | ga   | gw   |
| val: | 2.85e-08 | 2.73 | 1.19 |
| sd:  | NaN      | NaN  | NaN  |

GAIN-LOSS MODEL (in blue):

|      |          |      |      |      |      |
|------|----------|------|------|------|------|
|      | tp       | ga   | gw   | la   | lw   |
| val: | 6.63e-08 | 2.27 | 7.54 | 2.53 | 0.67 |
| sd:  | NaN      | NaN  | NaN  | NaN  | NaN  |

|       |        |        |        |
|-------|--------|--------|--------|
|       | CNST   | HILL   | GNLS   |
| AIC:  | 359.69 | 365.69 | 369.69 |
| PROB: | 0.95   | 0.05   | 0.01   |
| RMSE: | 40.9   | 40.9   | 40.9   |

MAX\_MEAN: 7.3 MAX\_MED: 7.36 BMAD: 6.75

COFF: 20.3 HIT-CALL: 0 FITC: 7 ACTP: 0.05

FLAGS: 10

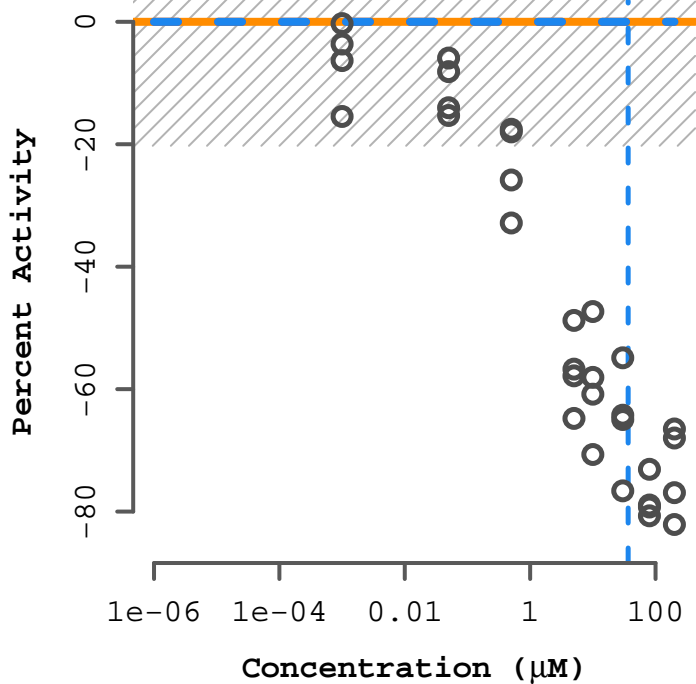

ASSAY: AEID3093 (CCTE\_Deisenroth\_DEVTOX\_RUES2-GLR\_Sox)

NAME: Thalidomide

CHID: 22524 CASRN: 50-35-1

SPID(S): ES211\_62\_62

M4ID: 42675868

HILL MODEL (in red):

|      | tp       | ga   | gw   |
|------|----------|------|------|
| val: | 7.67e-07 | 2.69 | 2.67 |
| sd:  | NaN      | NaN  | NaN  |

GAIN-LOSS MODEL (in blue):

|      | tp       | ga    | gw     | la   | lw     |
|------|----------|-------|--------|------|--------|
| val: | 1.78e-08 | 1.56  | 4.16   | 1.83 | 5.38   |
| sd:  | 0.000223 | 12800 | 328000 | 8690 | 494000 |

|       | CNST   | HILL   | GNLS   |
|-------|--------|--------|--------|
| AIC:  | 392.55 | 398.55 | 402.55 |
| PROB: | 0.95   | 0.05   | 0.01   |
| RMSE: | 51.11  | 51.11  | 51.11  |

MAX\_MEAN: 4.62 MAX\_MED: 3.35 BMAD: 6.75

COFF: 20.3 HIT-CALL: 0 FITC: 7 ACTP: 0.05

FLAGS: 10

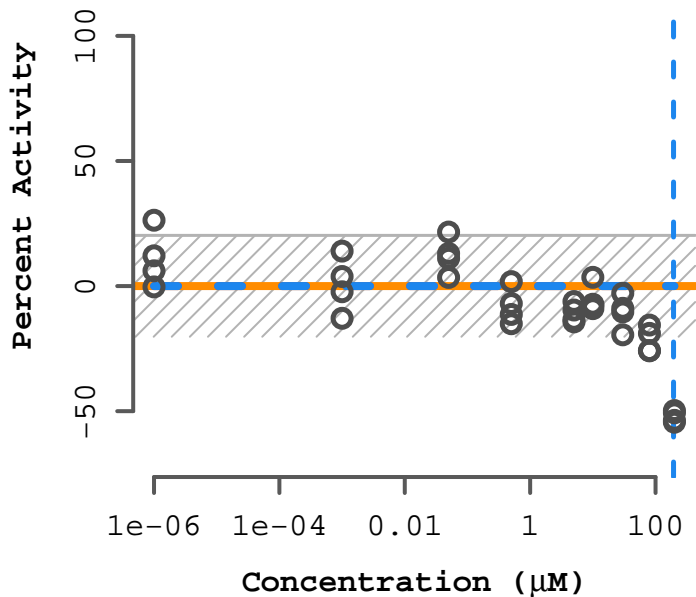

ASSAY: AEID3093 (CCTE\_Deisenroth\_DEVTOX\_RUES2-GLR\_Sox)

NAME: Carbamazepine

CHID: 22731 CASRN: 298-46-4

SPID(S): ES211\_21\_21

M4ID: 42675843

HILL MODEL (in red):

|      | tp   | ga  | gw   |
|------|------|-----|------|
| val: | 13.3 | 2.8 | 7.98 |
| sd:  | NaN  | NaN | NaN  |

GAIN-LOSS MODEL (in blue):

|      | tp       | ga   | gw   | la   | lw   |
|------|----------|------|------|------|------|
| val: | 4.14e-09 | 2.29 | 7.81 | 2.69 | 11.8 |
| sd:  | NA       | NA   | NA   | NA   | NA   |

|       | CNST   | HILL   | GNLS   |
|-------|--------|--------|--------|
| AIC:  | 321.73 | 327.73 | 331.73 |
| PROB: | 0.95   | 0.05   | 0.01   |
| RMSE: | 21.44  | 21.44  | 21.44  |

MAX\_MEAN: 12.3 MAX\_MED: 12.1 BMAD: 6.75

COFF: 20.3 HIT-CALL: 0 FITC: 7 ACTP: 0.05

FLAGS: 10

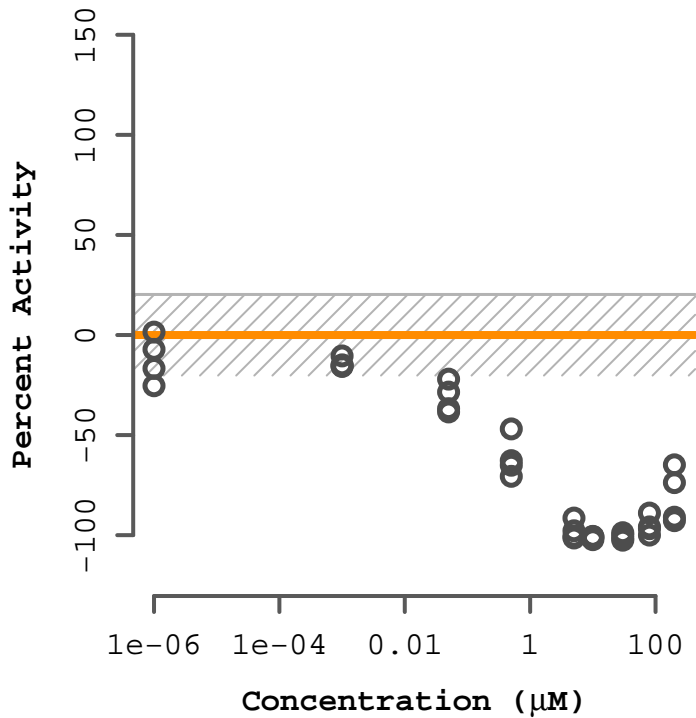

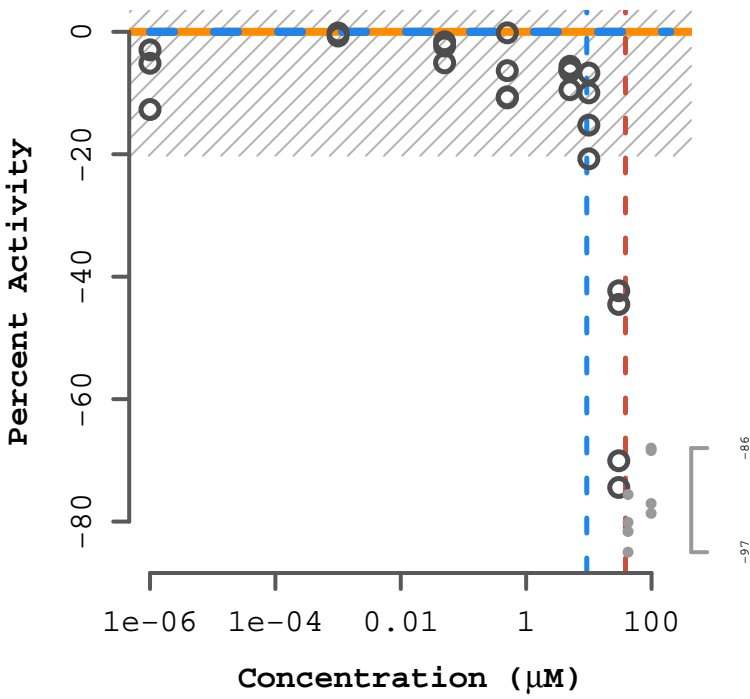

ASSAY: AEID3093 (CCTE\_Deisenroth\_DEVTOX\_RUES2-GLR\_Sox)

NAME: Retinol  
CHID: 23556 CASRN: 68-26-8  
SPID(S): ES211\_51\_51  
M4ID: 42675861 BRK

HILL MODEL (in red):  
tp ga gw  
val: 1.8e-08 1.58 0.926  
sd: NaN NaN NaN

GAIN-LOSS MODEL (in blue):  
tp ga gw la lw  
val: 2.52e-08 0.967 2.08 1.45 5.79  
sd: NaN NaN NaN NaN NaN

|       | CNST   | HILL   | GNLS   |
|-------|--------|--------|--------|
| AIC:  | 380.89 | 386.89 | 390.89 |
| PROB: | 0.95   | 0.05   | 0.01   |
| RMSE: | 48.22  | 48.22  | 48.22  |

MAX\_MEAN: 1.1 MAX\_MED: 1.06 BMAD: 6.75

COFF: 20.3 HIT-CALL: 0 FITC: 7 ACTP: 0.05

FLAGS: 10

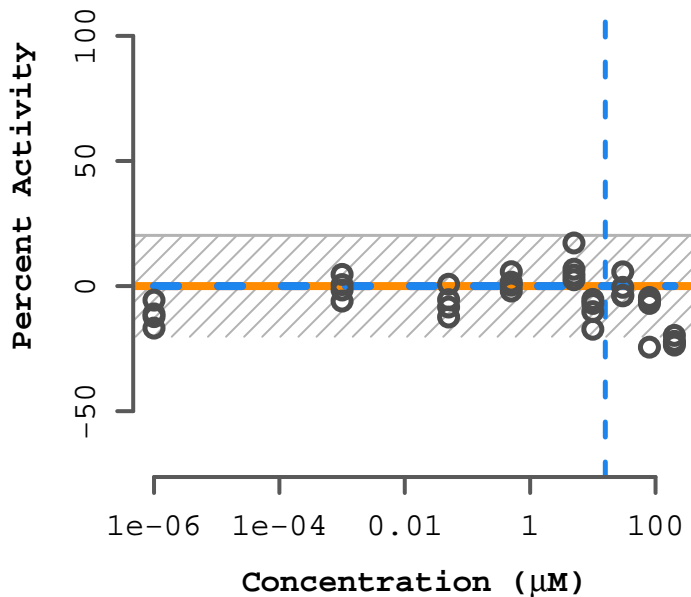

ASSAY: AEID3093 (CCTE\_Deisenroth\_DEVTOX\_RUES2-GLR\_Sox)

NAME: Valproic acid

CHID: 23733 CASRN: 99-66-1

SPID(S): ES211\_63\_63

M4ID: 42675869

HILL MODEL (in red):

|      | tp       | ga   | gw  |
|------|----------|------|-----|
| val: | 9.92e-07 | 2.79 | 3.8 |
| sd:  | NaN      | NaN  | NaN |

GAIN-LOSS MODEL (in blue):

|      | tp       | ga  | gw   | la   | lw   |
|------|----------|-----|------|------|------|
| val: | 9.32e-09 | 1.2 | 3.93 | 1.53 | 6.08 |
| sd:  | NaN      | NaN | NaN  | NaN  | NaN  |

|       | CNST   | HILL   | GNLS   |
|-------|--------|--------|--------|
| AIC:  | 278.68 | 284.68 | 288.68 |
| PROB: | 0.95   | 0.05   | 0.01   |
| RMSE: | 11.16  | 11.16  | 11.16  |

MAX\_MEAN: 7.73 MAX\_MED: 5.59 BMAD: 6.75

COFF: 20.3 HIT-CALL: 0 FITC: 7 ACTP: 0.05

FLAGS:

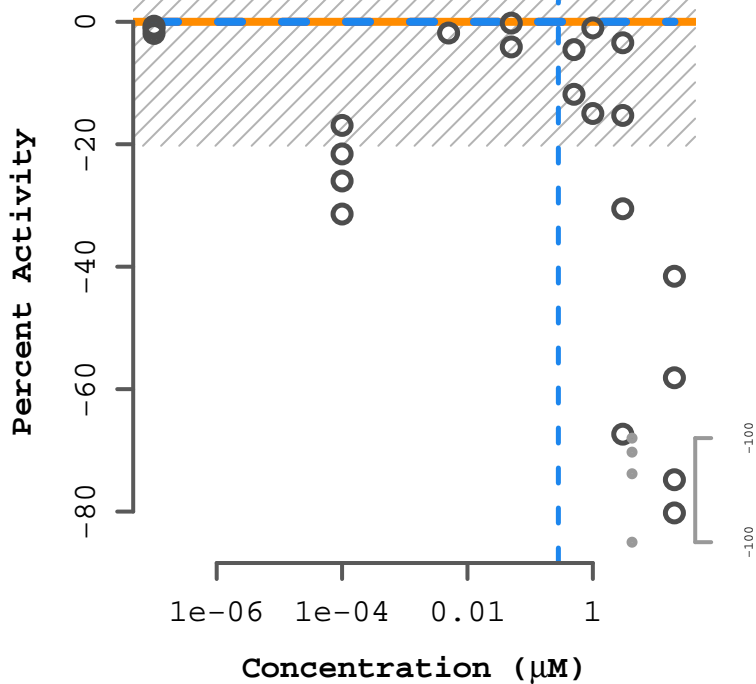

ASSAY: AEID3093 (CCTE\_Deisenroth\_DEVTOX\_RUES2-GLR\_Sox)

NAME: Ziprasidone

CHID: 23753 CASRN: 146939-27-7

SPID(S): ES211\_66\_66

M4ID: 42675836 BRK

HILL MODEL (in red):

|      | tp      | ga   | gw   |
|------|---------|------|------|
| val: | 2.3e-07 | 1.78 | 1.34 |
| sd:  | NaN     | NaN  | NaN  |

GAIN-LOSS MODEL (in blue):

|      | tp       | ga    | gw     | la     | lw      |
|------|----------|-------|--------|--------|---------|
| val: | 3.43e-08 | -0.55 | 2.64   | -0.155 | 5.69    |
| sd:  | 0.0116   | 34600 | 254000 | 40600  | 1390000 |

|       | CNST   | HILL   | GNLS   |
|-------|--------|--------|--------|
| AIC:  | 368.85 | 374.85 | 378.85 |
| PROB: | 0.95   | 0.05   | 0.01   |
| RMSE: | 43.15  | 43.15  | 43.15  |

MAX\_MEAN: 3.27 MAX\_MED: 4.35 BMAD: 6.75

COFF: 20.3 HIT-CALL: 0 FITC: 7 ACTP: 0.05

FLAGS: 10

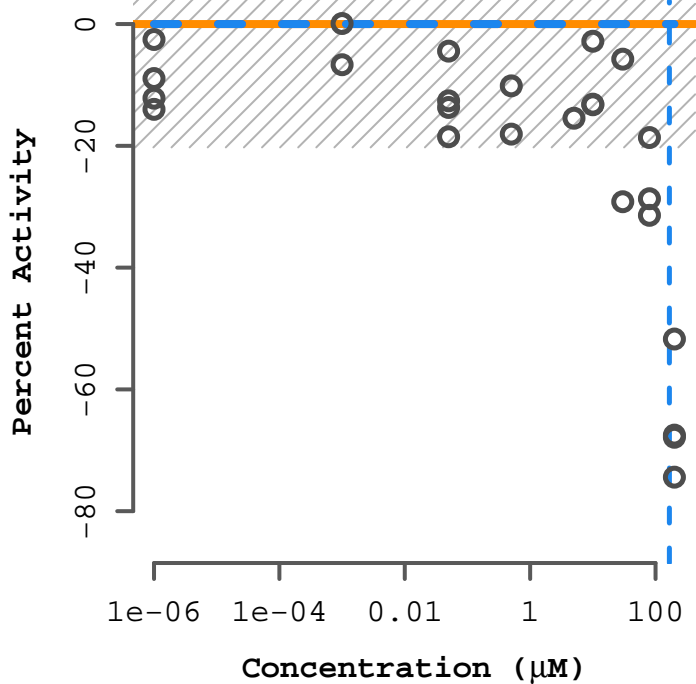

ASSAY: AEID3093 (CCTE\_Deisenroth\_DEVTOX\_RUES2-GLR\_Sox)

NAME: MEHP

CHID: 25680 CASRN: 4376-20-9

SPID(S): ES211\_44\_44

M4ID: 42675839

HILL MODEL (in red):

|      | tp    | ga  | gw   |
|------|-------|-----|------|
| val: | 0.352 | 2.8 | 7.98 |
| sd:  | NaN   | NaN | NaN  |

GAIN-LOSS MODEL (in blue):

|      | tp       | ga   | gw   | la   | lw   |
|------|----------|------|------|------|------|
| val: | 2.32e-08 | 2.22 | 4.89 | 3.93 | 9.84 |
| sd:  | NA       | NA   | NA   | NA   | NA   |

|       | CNST   | HILL   | GNLS   |
|-------|--------|--------|--------|
| AIC:  | 330.17 | 336.17 | 340.17 |
| PROB: | 0.95   | 0.05   | 0.01   |
| RMSE: | 25.62  | 25.62  | 25.62  |

MAX\_MEAN: 6.64 MAX\_MED: 12.4 BMAD: 6.75

COFF: 20.3 HIT-CALL: 0 FITC: 7 ACTP: 0.05

FLAGS: 10



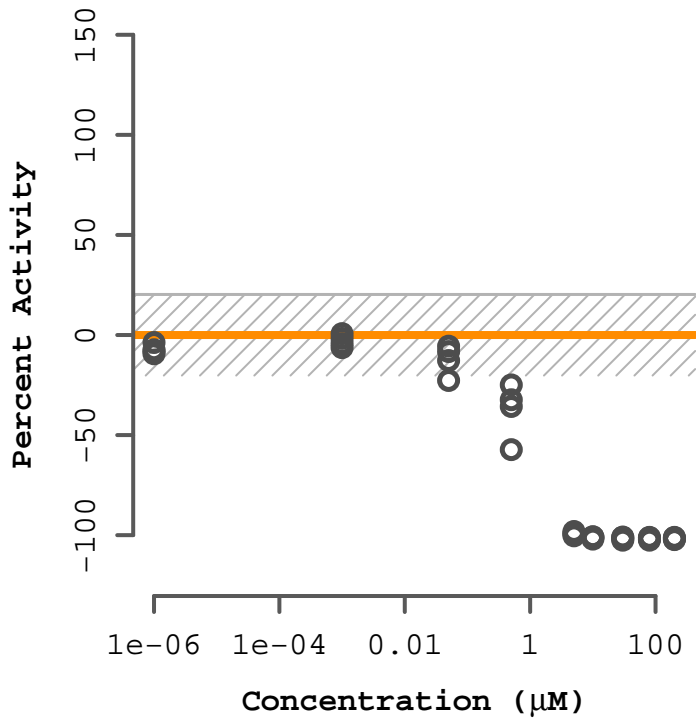

ASSAY: AEID3093 (CCTE\_Deisenroth\_DEVTOX\_RUES2-GLR\_Sox)

NAME: 5-Bromo-2'-deoxyuridine

CHID: 33105 CASRN: 59-14-3

SPID(S): ES211\_4\_4

M4ID: 42675882

HILL MODEL: Failed to converge.

GAIN-LOSS MODEL: Failed to converge.

|       |        |      |      |
|-------|--------|------|------|
|       | CNST   | HILL | GNLS |
| AIC:  | 448.66 | NA   | NA   |
| PROB: | 1      | NA   | NA   |
| RMSE: | 76.67  | NA   | NA   |

|           |       |          |       |       |      |
|-----------|-------|----------|-------|-------|------|
| MAX_MEAN: | -2.88 | MAX_MED: | -2.98 | BMAD: | 6.75 |
|-----------|-------|----------|-------|-------|------|

|       |      |           |   |       |   |       |   |
|-------|------|-----------|---|-------|---|-------|---|
| COFF: | 20.3 | HIT-CALL: | 0 | FITC: | 7 | ACTP: | 0 |
|-------|------|-----------|---|-------|---|-------|---|

FLAGS: 10

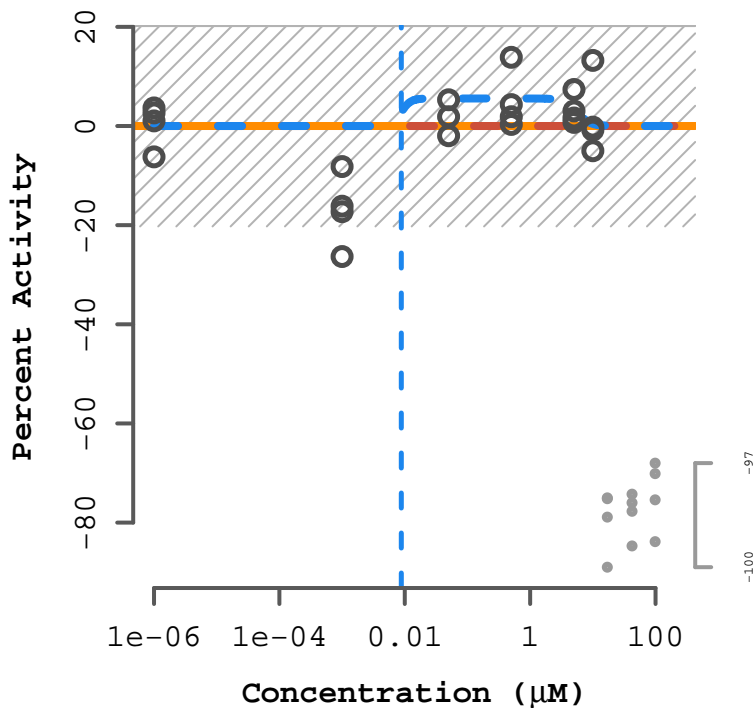

ASSAY: AEID3093 (CCTE\_Deisenroth\_DEVTOX\_RUES2-GLR\_Sox)

NAME: Amiodarone hydrochloride

CHID: 37185 CASRN: 19774-82-4

SPID(S): ES211\_14\_14

M4ID: 42675849 BRK

HILL MODEL (in red):

|      | tp   | ga  | gw   |
|------|------|-----|------|
| val: | 15.2 | 2.8 | 7.96 |
| sd:  | NaN  | NaN | NaN  |

GAIN-LOSS MODEL (in blue):

|      | tp   | ga    | gw   | la   | lw   |
|------|------|-------|------|------|------|
| val: | 5.55 | -2.06 | 5.94 | 0.75 | 4.21 |
| sd:  | 13.9 | 85.8  | 574  | 1.76 | 26.6 |

|       | CNST   | HILL   | GNLS   |
|-------|--------|--------|--------|
| AIC:  | 396.09 | 402.09 | 405.89 |
| PROB: | 0.95   | 0.05   | 0.01   |
| RMSE: | 58.16  | 58.16  | 58.09  |

MAX\_MEAN: 6.18 MAX\_MED: 3.59 BMAD: 6.75

COFF: 20.3 HIT-CALL: 0 FITC: 7 ACTP: 0.05

FLAGS: 10

Percent Activity

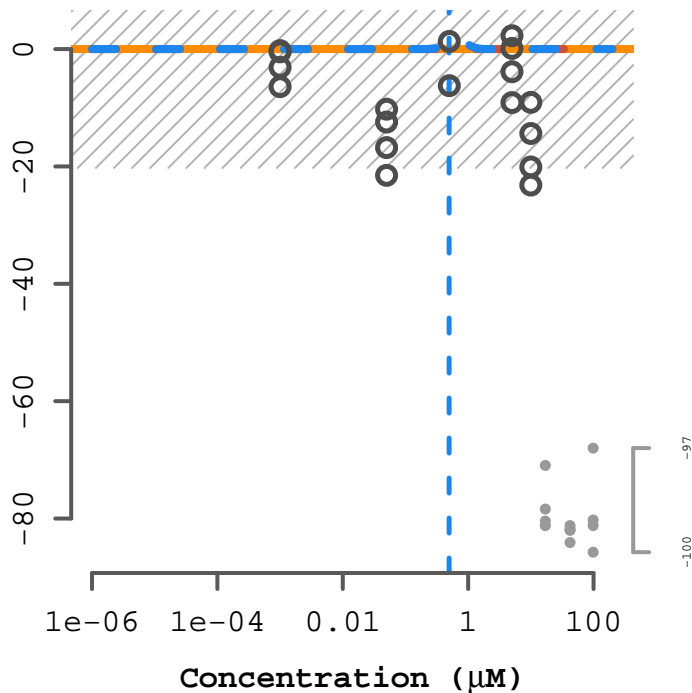

ASSAY: AEID3093 (CCTE\_Deisenroth\_DEVTOX\_RUES2-GLR\_Sox)

NAME: Imatinib mesylate

CHID: 40502 CASRN: 220127-57-1

SPID(S): ES211\_37\_37

M4ID: 42675892 BRK

HILL MODEL (in red):

|      | tp    | ga  | gw   |
|------|-------|-----|------|
| val: | 0.157 | 2.8 | 7.85 |
| sd:  | NaN   | NaN | NaN  |

GAIN-LOSS MODEL (in blue):

|      | tp  | ga     | gw   | la      | lw   |
|------|-----|--------|------|---------|------|
| val: | 2.8 | -0.304 | 5.68 | -0.0514 | 6.72 |
| sd:  | NaN | NaN    | NaN  | NaN     | NaN  |

|       | CNST   | HILL   | GNLS   |
|-------|--------|--------|--------|
| AIC:  | 396.96 | 402.96 | 406.95 |
| PROB: | 0.95   | 0.05   | 0.01   |
| RMSE: | 58.73  | 58.73  | 58.73  |

MAX\_MEAN: 7.83 MAX\_MED: 8.88 BMAD: 6.75

COFF: 20.3 HIT-CALL: 0 FITC: 7 ACTP: 0.05

FLAGS: 10

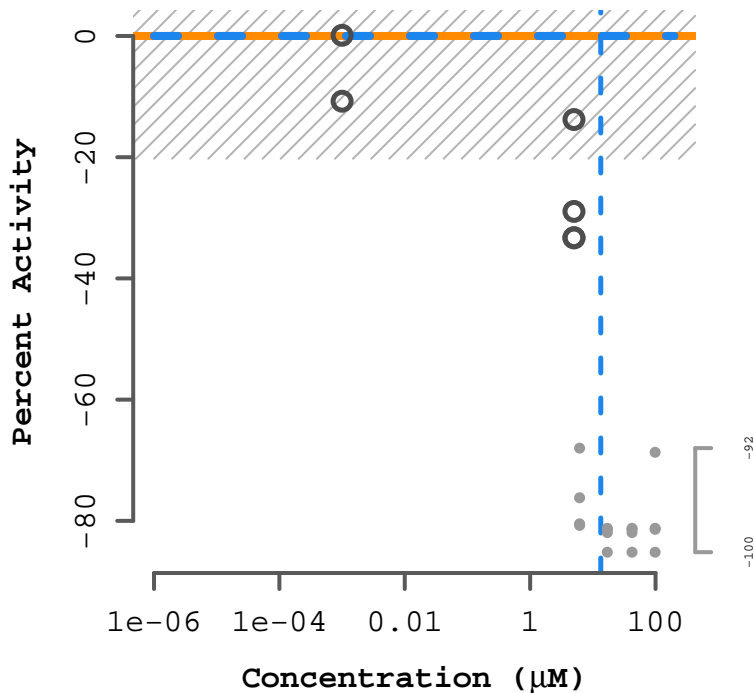

ASSAY: AEID3093 (CCTE\_Deisenroth\_DEVTOX\_RUES2-GLR\_Sox)

NAME: Gefitinib

CHID: 41034 CASRN: 184475-35-2

SPID(S): ES211\_34\_34

M4ID: 42675876 BRK

HILL MODEL (in red):

|      | tp    | ga  | gw   |
|------|-------|-----|------|
| val: | 0.656 | 2.8 | 7.91 |
| sd:  | NaN   | NaN | NaN  |

GAIN-LOSS MODEL (in blue):

|      | tp       | ga   | gw   | la   | lw   |
|------|----------|------|------|------|------|
| val: | 1.64e-07 | 1.13 | 7.19 | 1.38 | 6.88 |
| sd:  | NaN      | NaN  | NaN  | NaN  | NaN  |

|       | CNST  | HILL  | GNLS  |
|-------|-------|-------|-------|
| AIC:  | 411.1 | 417.1 | 421.1 |
| PROB: | 0.95  | 0.05  | 0.01  |
| RMSE: | 67.66 | 67.66 | 67.66 |

MAX\_MEAN: 10.5 MAX\_MED: 7.83 BMAD: 6.75

COFF: 20.3 HIT-CALL: 0 FITC: 7 ACTP: 0.05

FLAGS: 10

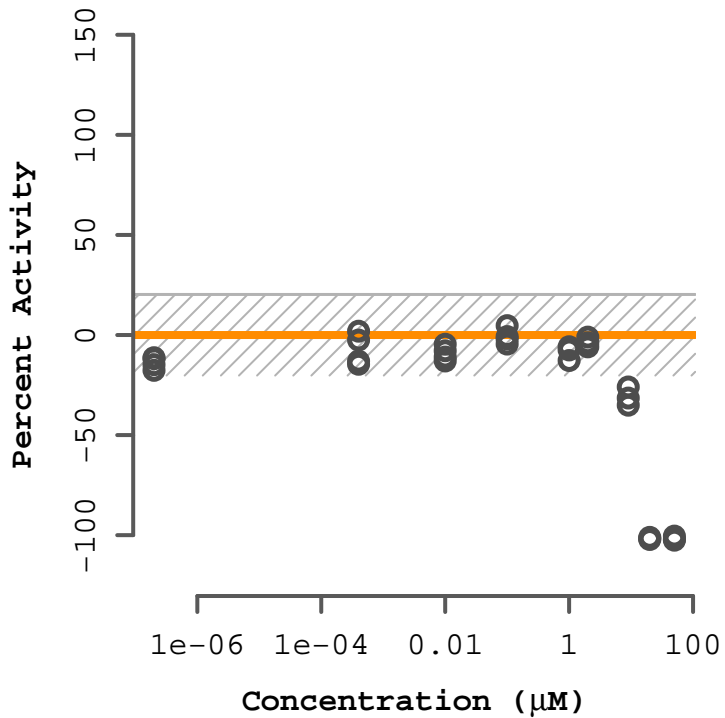

ASSAY: AEID3093 (CCTE\_Deisenroth\_DEVTOX\_RUES2-GLR\_Sox)

NAME: Ritanserin

CHID: 42594 CASRN: 87051-43-2

SPID(S): ES211\_53\_53

M4ID: 42675856

HILL MODEL: Failed to converge.

GAIN-LOSS MODEL: Failed to converge.

|       |        |      |      |
|-------|--------|------|------|
|       | CNST   | HILL | GNLS |
| AIC:  | 319.97 | NA   | NA   |
| PROB: | 1      | NA   | NA   |
| RMSE: | 46.41  | NA   | NA   |

MAX\_MEAN: -0.644 MAX\_MED: -1.38 BMAD: 6.75

COFF: 20.3 HIT-CALL: 0 FITC: 7 ACTP: 0

FLAGS: 10

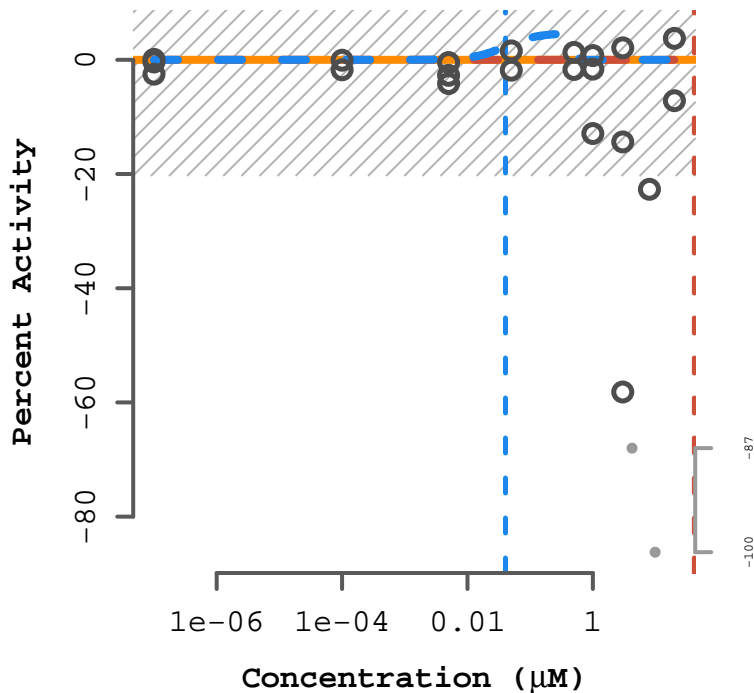

ASSAY: AEID3093 (CCTE\_Deisenroth\_DEVTOX\_RUES2-GLR\_Sox)

NAME: Cyclopamine

CHID: 43709 CASRN: 4449-51-8

SPID(S): ES211\_23\_23

M4ID: 42675838 BRK

HILL MODEL (in red):

|      | tp       | ga   | gw   |
|------|----------|------|------|
| val: | 4.15e-08 | 1.62 | 1.63 |
| sd:  | NaN      | NaN  | NaN  |

GAIN-LOSS MODEL (in blue):

|      | tp   | ga    | gw   | la     | lw  |
|------|------|-------|------|--------|-----|
| val: | 4.67 | -1.39 | 1.72 | -0.304 | 17  |
| sd:  | 296  | 36.3  | 54   | 2.85   | 632 |

|       | CNST  | HILL  | GNLS  |
|-------|-------|-------|-------|
| AIC:  | 261.4 | 267.4 | 270.6 |
| PROB: | 0.94  | 0.05  | 0.01  |
| RMSE: | 26.99 | 26.99 | 26.96 |

MAX\_MEAN: 3.34 MAX\_MED: 3.36 BMAD: 6.75

COFF: 20.3 HIT-CALL: 0 FITC: 7 ACTP: 0.06

FLAGS: 10

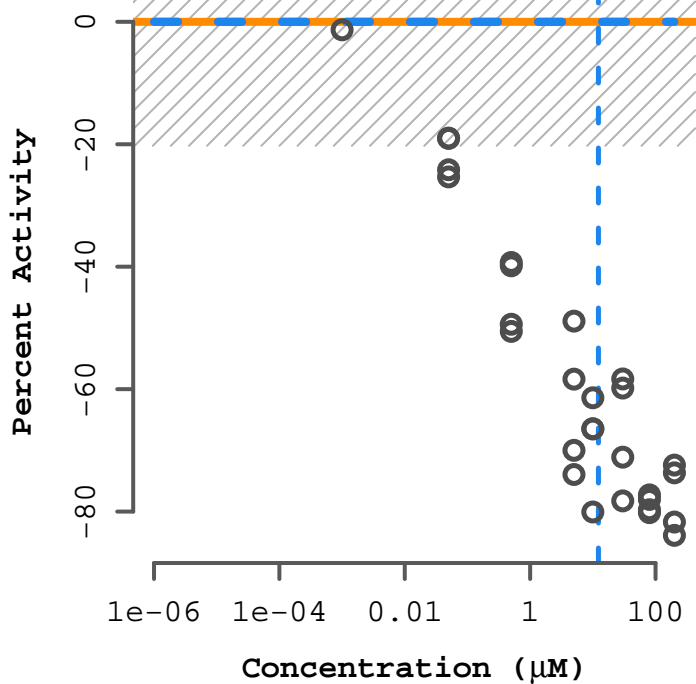

ASSAY: AEID3093 (CCTE\_Deisenroth\_DEVTOX\_RUES2-GLR\_Sox)

NAME: Lenalidomide

CHID: 46664 CASRN: 191732-72-6

SPID(S): ES211\_41\_41

M4ID: 42675877

HILL MODEL (in red):

|      |         |      |      |
|------|---------|------|------|
|      | tp      | ga   | gw   |
| val: | 0.00239 | 2.78 | 7.08 |
| sd:  | NaN     | NaN  | NaN  |

GAIN-LOSS MODEL (in blue):

|      |         |      |      |      |      |
|------|---------|------|------|------|------|
|      | tp      | ga   | gw   | la   | lw   |
| val: | 3.4e-07 | 1.09 | 5.42 | 1.35 | 13.6 |
| sd:  | NaN     | NaN  | NaN  | NaN  | NaN  |

|       |        |        |        |
|-------|--------|--------|--------|
|       | CNST   | HILL   | GNLS   |
| AIC:  | 400.18 | 406.18 | 410.18 |
| PROB: | 0.95   | 0.05   | 0.01   |
| RMSE: | 56.09  | 56.09  | 56.09  |

MAX\_MEAN: 10.3 MAX\_MED: 9.38 BMAD: 6.75

COFF: 20.3 HIT-CALL: 0 FITC: 7 ACTP: 0.05

FLAGS: 10

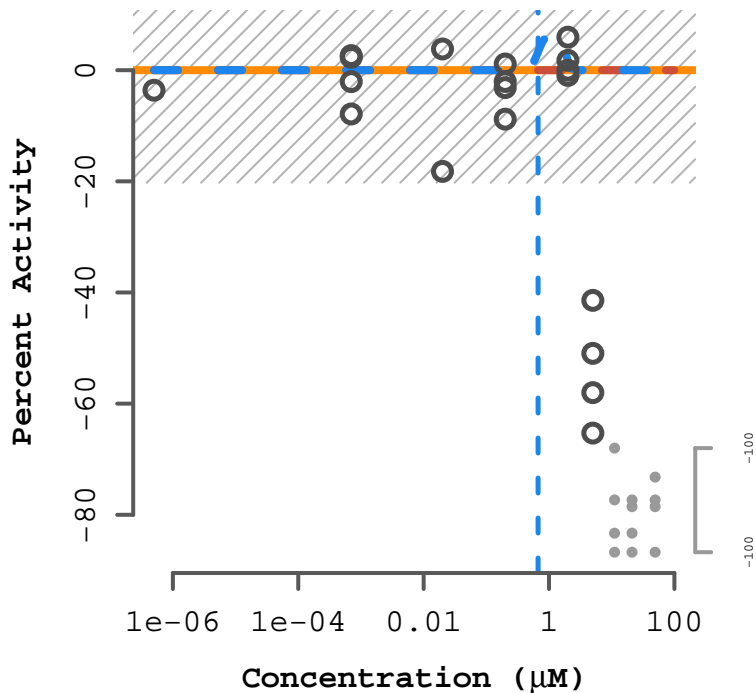

ASSAY: AEID3093 (CCTE\_Deisenroth\_DEVTOX\_RUES2-GLR\_Sox)

NAME: Vandetanib

CHID: 46681 CASRN: 443913-73-3

SPID(S): ES211\_64\_64

M4ID: 42675848 BRK

HILL MODEL (in red):

|      | tp    | ga  | gw   |
|------|-------|-----|------|
| val: | 0.288 | 2.5 | 7.88 |
| sd:  | NaN   | NaN | NaN  |

GAIN-LOSS MODEL (in blue):

|      | tp   | ga     | gw   | la    | lw   |
|------|------|--------|------|-------|------|
| val: | 6.57 | -0.174 | 7.48 | 0.264 | 12.4 |
| sd:  | 1630 | 56.3   | 803  | 12.8  | 812  |

|       | CNST   | HILL   | GNLS   |
|-------|--------|--------|--------|
| AIC:  | 402.56 | 408.56 | 412.56 |
| PROB: | 0.95   | 0.05   | 0.01   |
| RMSE: | 61.64  | 61.64  | 61.63  |

MAX\_MEAN: 7.33 MAX\_MED: 9.78 BMAD: 6.75

COFF: 20.3 HIT-CALL: 0 FITC: 7 ACTP: 0.05

FLAGS: 10



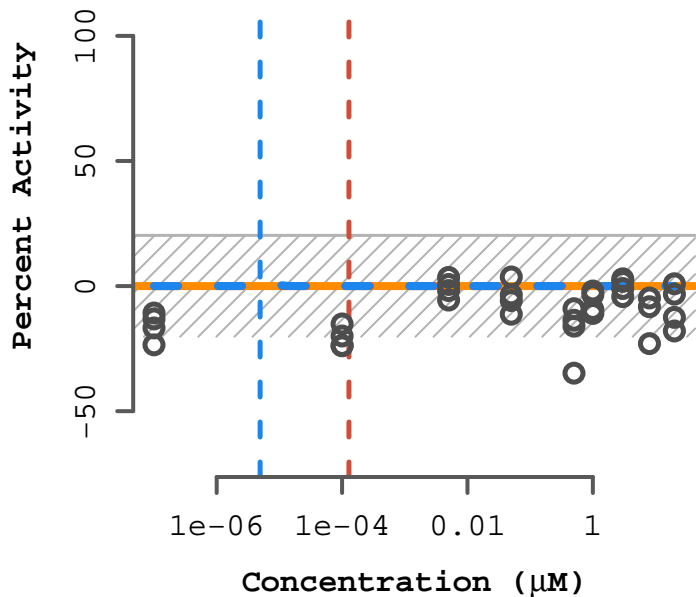

ASSAY: AEID3093 (CCTE\_Deisenroth\_DEVTOX\_RUES2-GLR\_Sox)

NAME: Dexamethasone sodium phosphate

CHID: 47429 CASRN: 2392-39-4

SPID(S): ES211\_28\_28

M4ID: 42675857

HILL MODEL (in red):

|      |          |       |        |
|------|----------|-------|--------|
|      | tp       | ga    | gw     |
| val: | 2.26e-10 | -3.89 | 1.54   |
| sd:  | 4.43e-05 | 27300 | 390000 |

GAIN-LOSS MODEL (in blue):

|      |       |       |      |     |      |
|------|-------|-------|------|-----|------|
|      | tp    | ga    | gw   | la  | lw   |
| val: | 0.945 | -5.31 | 4.14 | -5  | 6.91 |
| sd:  | NaN   | NaN   | NaN  | NaN | NaN  |

|       |        |        |        |
|-------|--------|--------|--------|
|       | CNST   | HILL   | GNLS   |
| AIC:  | 283.94 | 289.94 | 293.94 |
| PROB: | 0.95   | 0.05   | 0.01   |
| RMSE: | 13.32  | 13.32  | 13.32  |

MAX\_MEAN: -0.0942 MAX\_MED: 0.457 BMAD: 6.75

COFF: 20.3 HIT-CALL: 0 FITC: 7 ACTP: 0.05

FLAGS:

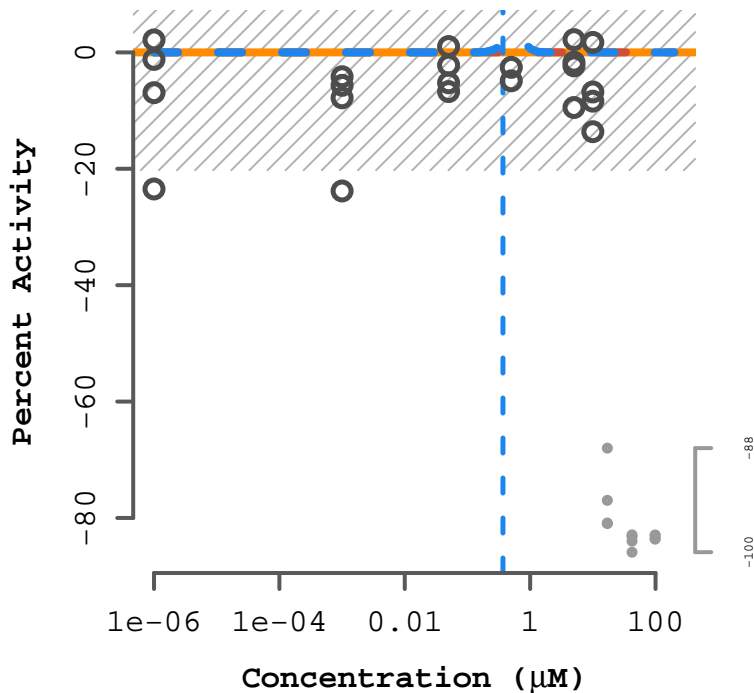

ASSAY: AEID3093 (CCTE\_Deisenroth\_DEVTOX\_RUES2-GLR\_Sox)

NAME: 6-aminopyridine-3-carboxamide

CHID: 51446 CASRN: 329-89-5

SPID(S): ES211\_7\_7

M4ID: 42675865 BRK

HILL MODEL (in red):

|      | tp      | ga   | gw   |
|------|---------|------|------|
| val: | 3.1e-05 | 2.75 | 5.36 |
| sd:  | NaN     | NaN  | NaN  |

GAIN-LOSS MODEL (in blue):

|      | tp   | ga     | gw   | la      | lw   |
|------|------|--------|------|---------|------|
| val: | 3.37 | -0.434 | 5.33 | -0.0899 | 6.49 |
| sd:  | 406  | 50     | 572  | 76.8    | 1110 |

|       | CNST   | HILL   | GNLS   |
|-------|--------|--------|--------|
| AIC:  | 395.36 | 401.36 | 405.34 |
| PROB: | 0.95   | 0.05   | 0.01   |
| RMSE: | 57.69  | 57.69  | 57.69  |

MAX\_MEAN: 2.7 MAX\_MED: 3 BMAD: 6.75

COFF: 20.3 HIT-CALL: 0 FITC: 7 ACTP: 0.05

FLAGS: 10

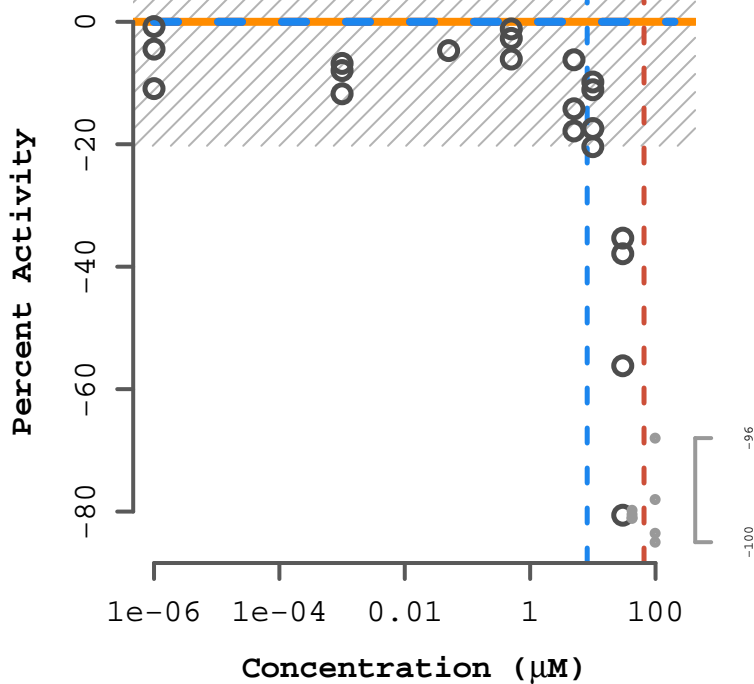

ASSAY: AEID3093 (CCTE\_Deisenroth\_DEVTOX\_RUES2-GLR\_Sox)

NAME: Esomeprazole magnesium hydrate

CHID: 746660 CASRN: 668985-31-7

SPID(S): ES211\_43\_43

M4ID: 42675898 BRK

HILL MODEL (in red):

|      | tp       | ga   | gw   |
|------|----------|------|------|
| val: | 2.46e-09 | 1.82 | 2.21 |
| sd:  | NaN      | NaN  | NaN  |

GAIN-LOSS MODEL (in blue):

|      | tp       | ga    | gw     | la    | lw      |
|------|----------|-------|--------|-------|---------|
| val: | 4.79e-09 | 0.91  | 2.15   | 1.18  | 6.28    |
| sd:  | 0.00206  | 10500 | 995000 | 19300 | 1290000 |

|       | CNST   | HILL   | GNLS   |
|-------|--------|--------|--------|
| AIC:  | 384.57 | 390.57 | 394.57 |
| PROB: | 0.95   | 0.05   | 0.01   |
| RMSE: | 51.46  | 51.46  | 51.46  |

MAX\_MEAN: 0.101 MAX\_MED: 1.23 BMAD: 6.75

COFF: 20.3 HIT-CALL: 0 FITC: 7 ACTP: 0.05

FLAGS: 10

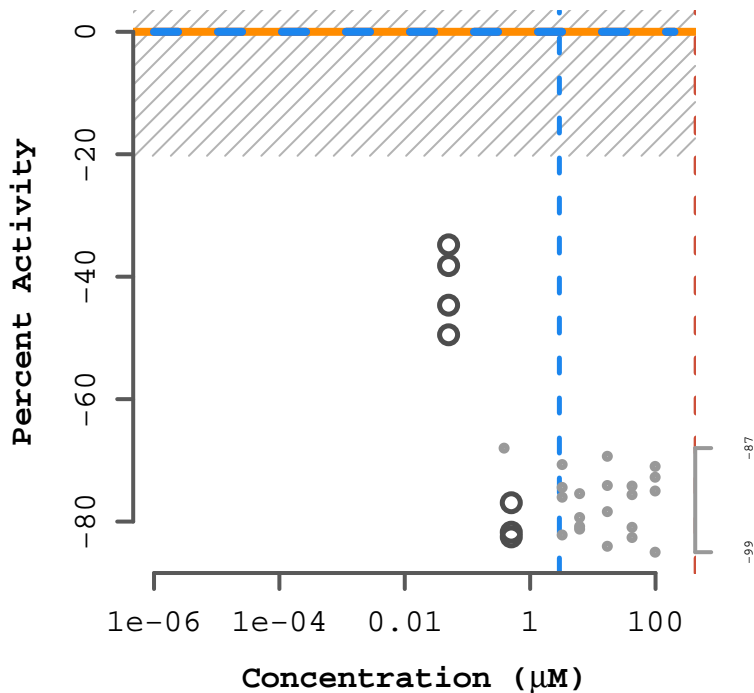

ASSAY: AEID3093 (CCTE\_Deisenroth\_DEVTOX\_RUES2-GLR\_Sox)

NAME: Pomalidomide

CHID: 893458 CASRN: 19171-19-8

SPID(S): ES211\_50\_50

M4ID: 42675862 BRK

HILL MODEL (in red):

|      | tp       | ga   | gw   |
|------|----------|------|------|
| val: | 3.29e-06 | 2.65 | 6.28 |
| sd:  | NaN      | NaN  | NaN  |

GAIN-LOSS MODEL (in blue):

|      | tp      | ga    | gw   | la    | lw   |
|------|---------|-------|------|-------|------|
| val: | 1.6e-07 | 0.467 | 6.75 | 0.889 | 11.4 |
| sd:  | NaN     | NaN   | NaN  | NaN   | NaN  |

|       | CNST   | HILL   | GNLS   |
|-------|--------|--------|--------|
| AIC:  | 423.35 | 429.35 | 433.35 |
| PROB: | 0.95   | 0.05   | 0.01   |
| RMSE: | 76.56  | 76.56  | 76.56  |

MAX\_MEAN: 8.72 MAX\_MED: 7.3 BMAD: 6.75

COFF: 20.3 HIT-CALL: 0 FITC: 7 ACTP: 0.05

FLAGS: 10

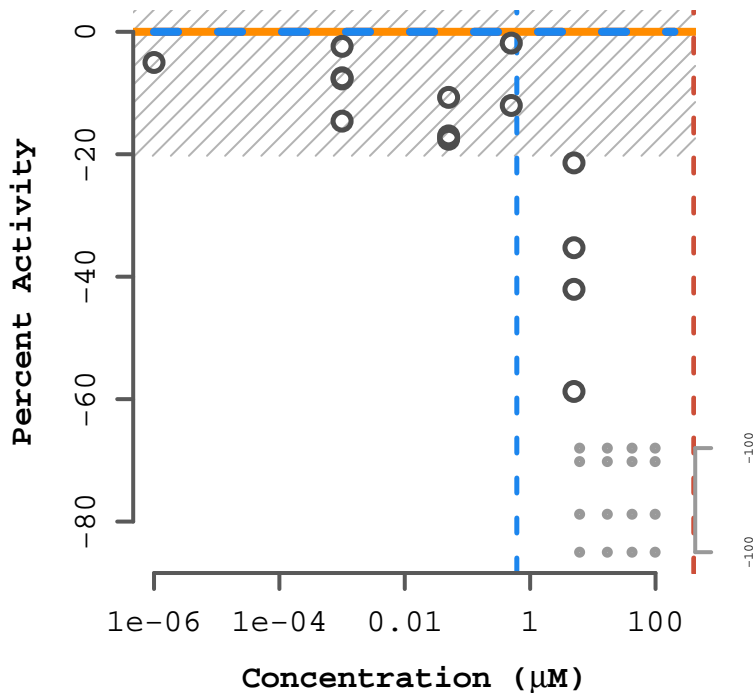

ASSAY: AEID3093 (CCTE\_Deisenroth\_DEVTOX\_RUES2-GLR\_Sox)

NAME: Tegaserod maleate

CHID: 904761 CASRN: 189188-57-6

SPID(S): ES211\_61\_61

M4ID: 42675893 BRK

HILL MODEL (in red):

|      | tp       | ga   | gw   |
|------|----------|------|------|
| val: | 8.57e-07 | 2.61 | 2.43 |
| sd:  | NaN      | NaN  | NaN  |

GAIN-LOSS MODEL (in blue):

|      | tp       | ga     | gw   | la    | lw   |
|------|----------|--------|------|-------|------|
| val: | 2.12e-05 | -0.213 | 6.44 | 0.249 | 6.19 |
| sd:  | NaN      | NaN    | NaN  | NaN   | NaN  |

|       | CNST   | HILL   | GNLS   |
|-------|--------|--------|--------|
| AIC:  | 413.53 | 419.53 | 423.53 |
| PROB: | 0.95   | 0.05   | 0.01   |
| RMSE: | 69.54  | 69.54  | 69.54  |

MAX\_MEAN: 6.89 MAX\_MED: 6.94 BMAD: 6.75

COFF: 20.3 HIT-CALL: 0 FITC: 7 ACTP: 0.05

FLAGS: 10

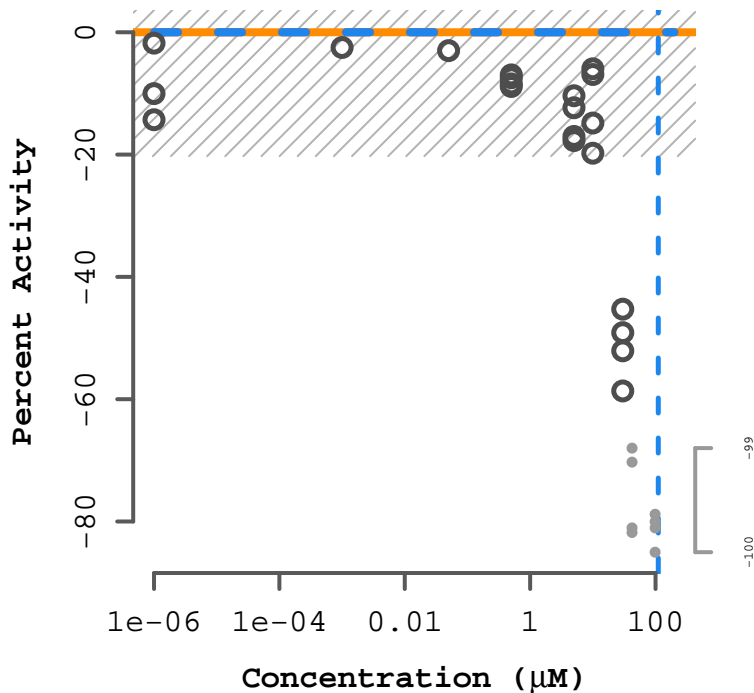

ASSAY: AEID3093 (CCTE\_Deisenroth\_DEVTOX\_RUES2-GLR\_Sox)

NAME: Mianserin hydrochloride

CHID: 944145 CASRN: 21535-47-7

SPID(S): ES211\_47\_47

M4ID: 42675903 BRK

HILL MODEL (in red):

|      | tp    | ga  | gw   |
|------|-------|-----|------|
| val: | 0.074 | 2.8 | 7.78 |
| sd:  | NaN   | NaN | NaN  |

GAIN-LOSS MODEL (in blue):

|      | tp       | ga   | gw    | la   | lw   |
|------|----------|------|-------|------|------|
| val: | 9.22e-10 | 2.04 | 0.857 | 2.36 | 17.9 |
| sd:  | NaN      | NaN  | NaN   | NaN  | NaN  |

|       | CNST   | HILL   | GNLS   |
|-------|--------|--------|--------|
| AIC:  | 384.33 | 390.33 | 394.33 |
| PROB: | 0.95   | 0.05   | 0.01   |
| RMSE: | 51.11  | 51.11  | 51.11  |

MAX\_MEAN: 2.7 MAX\_MED: 3.98 BMAD: 6.75

COFF: 20.3 HIT-CALL: 0 FITC: 7 ACTP: 0.05

FLAGS: 10

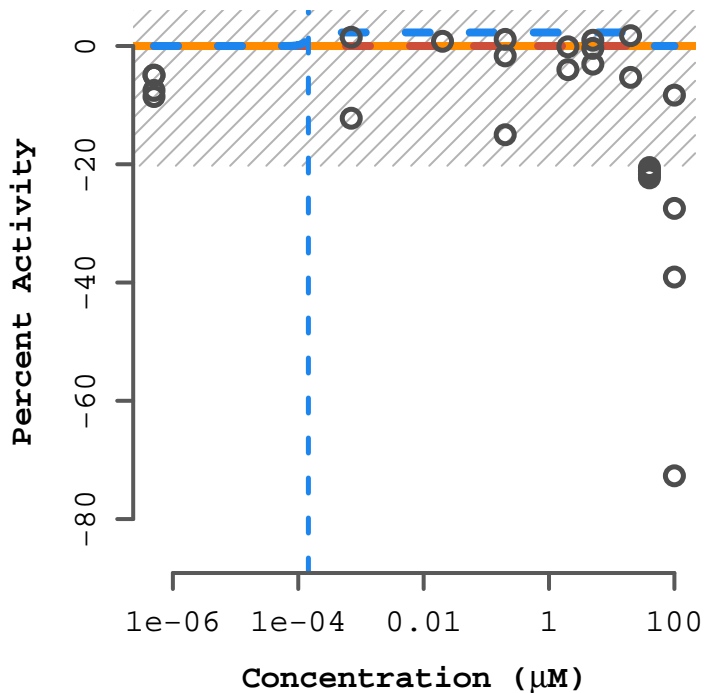

ASSAY: AEID3093 (CCTE\_Deisenroth\_DEVTOX\_RUES2-GLR\_Sox)

NAME: Ketanserin tartrate

CHID: 1003945 CASRN: 83846-83-7

SPID(S): ES211\_40\_40

M4ID: 42675874

HILL MODEL (in red):

|      | tp     | ga   | gw   |
|------|--------|------|------|
| val: | 0.0744 | 2.49 | 7.96 |
| sd:  | NaN    | NaN  | NaN  |

GAIN-LOSS MODEL (in blue):

|      | tp   | ga    | gw   | la    | lw   |
|------|------|-------|------|-------|------|
| val: | 2.29 | -3.84 | 7.22 | 1.43  | 18   |
| sd:  | 2.03 | 235   | 2480 | 0.562 | 66.5 |

|       | CNST  | HILL  | GNLS   |
|-------|-------|-------|--------|
| AIC:  | 295.8 | 301.8 | 304.58 |
| PROB: | 0.94  | 0.05  | 0.01   |
| RMSE: | 17.34 | 17.34 | 17.26  |

MAX\_MEAN: 5.18      MAX\_MED: 5.62      BMAD: 6.75

COFF: 20.3      HIT-CALL: 0      FITC: 7      ACTP: 0.06

FLAGS:

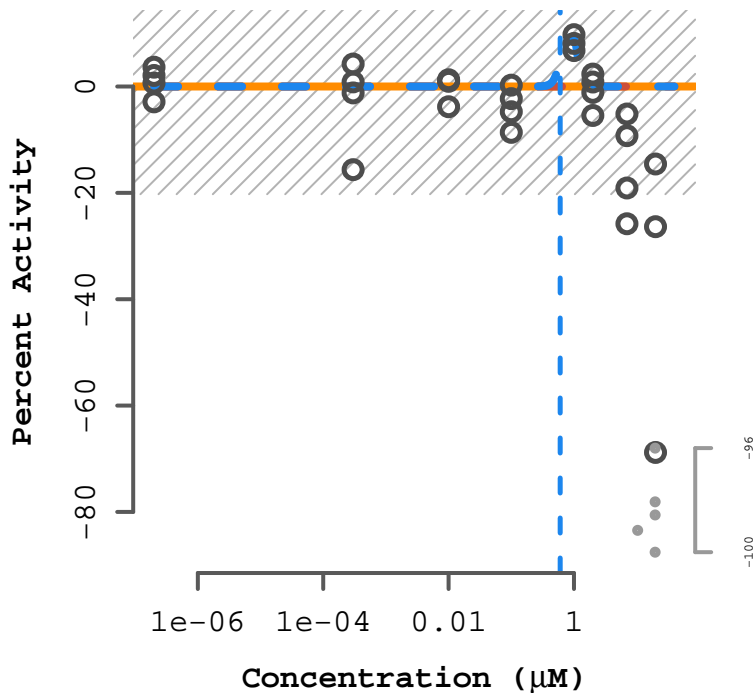

ASSAY: AEID3093 (CCTE\_Deisenroth\_DEVTOX\_RUES2-GLR\_Sox)

NAME: Dorsomorphin

CHID: 1006988 CASRN: 866405-64-3

SPID(S): ES211\_6\_6

M4ID: 42675888 BRK

HILL MODEL (in red):

|      | tp     | ga   | gw   |
|------|--------|------|------|
| val: | 0.0027 | 2.08 | 7.45 |
| sd:  | NaN    | NaN  | NaN  |

GAIN-LOSS MODEL (in blue):

|      | tp  | ga    | gw  | la     | lw   |
|------|-----|-------|-----|--------|------|
| val: | 9.8 | -0.22 | 8   | 0.0662 | 17.9 |
| sd:  | NaN | NaN   | NaN | NaN    | NaN  |

|       | CNST   | HILL   | GNLS   |
|-------|--------|--------|--------|
| AIC:  | 351.83 | 357.83 | 360.33 |
| PROB: | 0.94   | 0.05   | 0.01   |
| RMSE: | 39.9   | 39.9   | 39.79  |

MAX\_MEAN: 9.04 MAX\_MED: 8.93 BMAD: 6.75

COFF: 20.3 HIT-CALL: 0 FITC: 7 ACTP: 0.06

FLAGS: 10



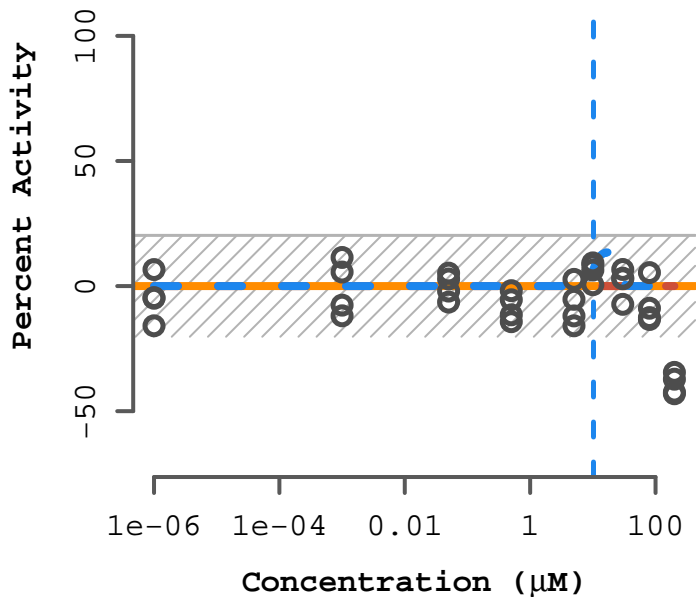

ASSAY: AEID3093 (CCTE\_Deisenroth\_DEVTOX\_RUES2-GLR\_Sox)

NAME: (2R,3S)-2-(3,4-Dihydroxyphenyl)-3,4-dihydro-2H-

CHID: 1017388 CASRN: 225937-10-0

SPID(S): ES211\_22\_22

M4ID: 42675887

HILL MODEL (in red):

|      | tp    | ga  | gw   |
|------|-------|-----|------|
| val: | 0.117 | 2.8 | 7.97 |
| sd:  | NaN   | NaN | NaN  |

GAIN-LOSS MODEL (in blue):

|      | tp   | ga   | gw  | la   | lw   |
|------|------|------|-----|------|------|
| val: | 13.7 | 1.01 | 8   | 1.41 | 13.6 |
| sd:  | NaN  | NaN  | NaN | NaN  | NaN  |

|       | CNST  | HILL  | GNLS   |
|-------|-------|-------|--------|
| AIC:  | 295   | 301   | 303.25 |
| PROB: | 0.94  | 0.05  | 0.02   |
| RMSE: | 15.42 | 15.42 | 15.28  |

MAX\_MEAN: 6.18 MAX\_MED: 7.45 BMAD: 6.75

COFF: 20.3 HIT-CALL: 0 FITC: 7 ACTP: 0.06

FLAGS:

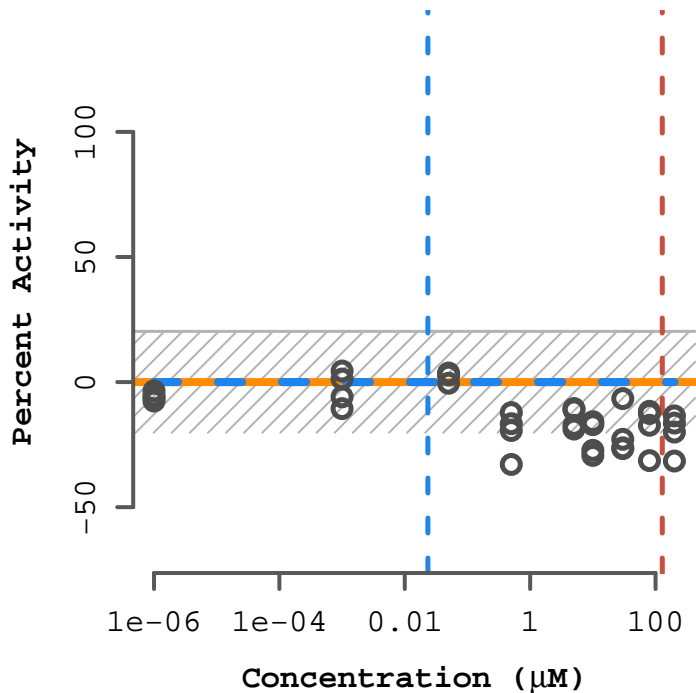

ASSAY: AEID3093 (CCTE\_Deisenroth\_DEVTOX\_RUES2-GLR\_Sox)

NAME: Methotrexate hydrate(1:x)  
 CHID: 1017640 CASRN: 133073-73-1  
 SPID(S): ES211\_45\_45  
 M4ID: 42675859

HILL MODEL (in red):

|      | tp       | ga   | gw   |
|------|----------|------|------|
| val: | 8.02e-10 | 2.11 | 1.36 |
| sd:  | NaN      | NaN  | NaN  |

GAIN-LOSS MODEL (in blue):

|      | tp       | ga    | gw    | la    | lw    |
|------|----------|-------|-------|-------|-------|
| val: | 1.55e-08 | -1.63 | 0.509 | -1.32 | 0.443 |
| sd:  | NaN      | NaN   | NaN   | NaN   | NaN   |

|       | CNST   | HILL   | GNLS   |
|-------|--------|--------|--------|
| AIC:  | 313.19 | 319.19 | 323.19 |
| PROB: | 0.95   | 0.05   | 0.01   |
| RMSE: | 17.19  | 17.19  | 17.19  |

MAX\_MEAN: 2.23      MAX\_MED: 2.87      BMAD: 6.75

COFF: 20.3      HIT-CALL: 0      FITC: 7      ACTP: 0.05

FLAGS:

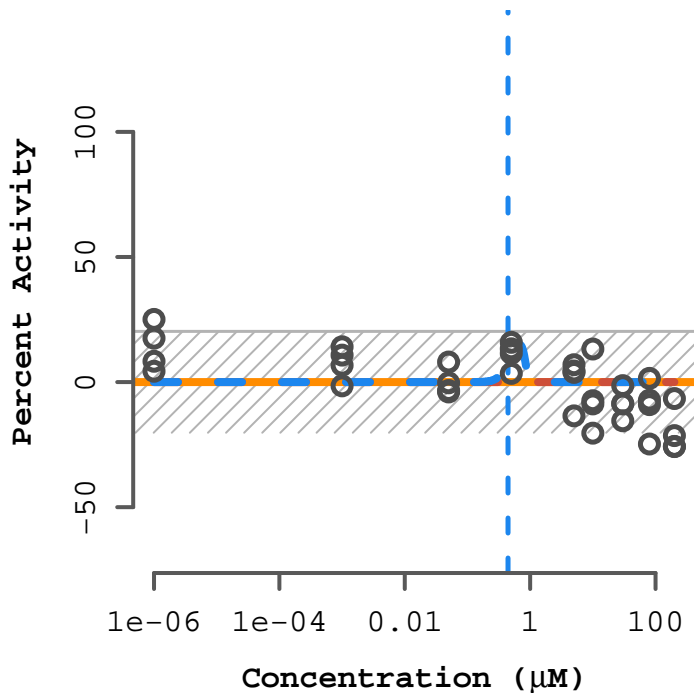

ASSAY: AEID3093 (CCTE\_Deisenroth\_DEVTOX\_RUES2-GLR\_Sox)

NAME: Methyl dopa sesquihydrate

CHID: 20863 CASRN: 41372-08-1

SPID(S): ES211\_46\_46

M4ID: 42675866

HILL MODEL (in red):

|      | tp       | ga   | gw   |
|------|----------|------|------|
| val: | 1.17e-08 | 2.79 | 1.73 |
| sd:  | NaN      | NaN  | NaN  |

GAIN-LOSS MODEL (in blue):

|      | tp  | ga     | gw   | la      | lw    |
|------|-----|--------|------|---------|-------|
| val: | 17  | -0.353 | 5.52 | -0.0782 | 15.5  |
| sd:  | 854 | 8.83   | 544  | 192     | 13400 |

|       | CNST   | HILL   | GNLS   |
|-------|--------|--------|--------|
| AIC:  | 291.48 | 297.48 | 297.09 |
| PROB: | 0.9    | 0.04   | 0.05   |
| RMSE: | 12.91  | 12.91  | 12.38  |

MAX\_MEAN: 13.8 MAX\_MED: 12.9 BMAD: 6.75

COFF: 20.3 HIT-CALL: 0 FITC: 9 ACTP: 0.1

FLAGS:

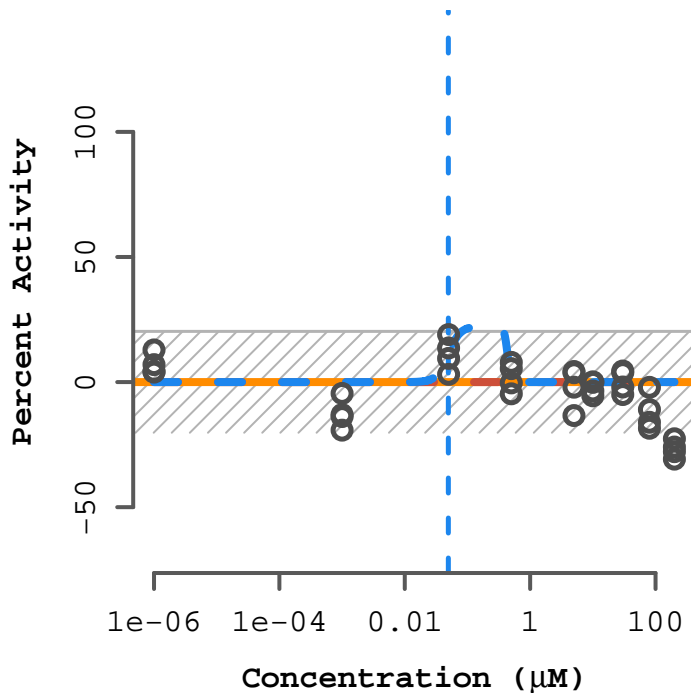

ASSAY: AEID3093 (CCTE\_Deisenroth\_DEVTOX\_RUES2-GLR\_Sox)

NAME: Warfarin

CHID: 23742 CASRN: 81-81-2

SPID(S): ES211\_65\_65

M4ID: 42675873

HILL MODEL (in red):

|      | tp   | ga  | gw  |
|------|------|-----|-----|
| val: | 2.57 | 2.8 | 8   |
| sd:  | NaN  | NaN | NaN |

GAIN-LOSS MODEL (in blue):

|      | tp   | ga    | gw   | la     | lw   |
|------|------|-------|------|--------|------|
| val: | 22.3 | -1.31 | 4.64 | -0.361 | 16.2 |
| sd:  | NaN  | NaN   | NaN  | NaN    | NaN  |

|       | CNST   | HILL   | GNLS   |
|-------|--------|--------|--------|
| AIC:  | 286.97 | 292.97 | 291.72 |
| PROB: | 0.87   | 0.04   | 0.08   |
| RMSE: | 12.59  | 12.59  | 11.99  |

MAX\_MEAN: 11.3 MAX\_MED: 11.6 BMAD: 6.75

COFF: 20.3 HIT-CALL: 0 FITC: 10 ACTP: 0.13

FLAGS:

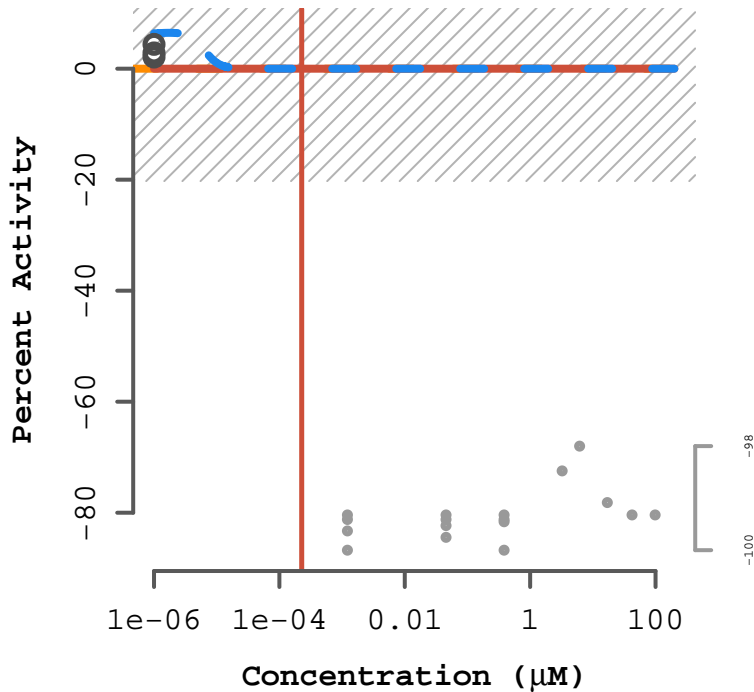

ASSAY: AEID3093 (CCTE\_Deisenroth\_DEVTOX\_RUES2-GLR\_Sox)

NAME: Actinomycin D

CHID: 20031 CASRN: 50-76-0

SPID(S): ES211\_11\_11

M4ID: 42675875 BRK

HILL MODEL (in red):

|      | tp       | ga    | gw   |
|------|----------|-------|------|
| val: | 2.27e-08 | -3.64 | 1.38 |
| sd:  | NaN      | NaN   | NaN  |

GAIN-LOSS MODEL (in blue):

|      | tp   | ga  | gw   | la    | lw   |
|------|------|-----|------|-------|------|
| val: | 6.67 | -7  | 1.3  | -5.19 | 3.7  |
| sd:  | 770  | 965 | 1260 | 1470  | 3600 |

|       | CNST   | HILL   | GNLS   |
|-------|--------|--------|--------|
| AIC:  | 501.14 | 261.53 | 265.51 |
| PROB: | 0      | 0.88   | 0.12   |
| RMSE: | 91.05  | 91.05  | 91.01  |

MAX\_MEAN: 6.35 MAX\_MED: 3.62 BMAD: 6.75

COFF: 20.3 HIT-CALL: 0 FITC: 13 ACTP: 1

FLAGS: 10

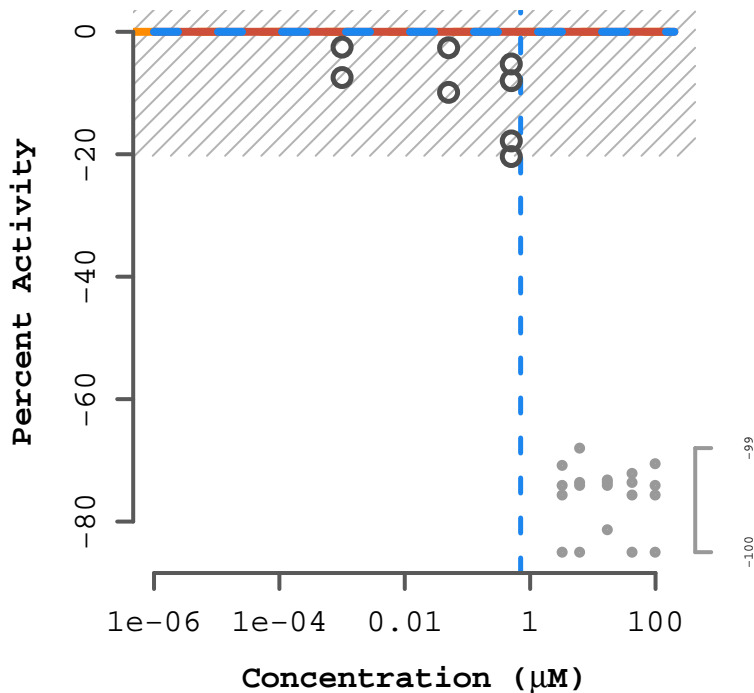

ASSAY: AEID3093 (CCTE\_Deisenroth\_DEVTOX\_RUES2-GLR\_Sox)

NAME: Diethylstilbestrol

CHID: 20465 CASRN: 56-53-1

SPID(S): ES211\_29\_29

M4ID: 42675854 BRK

HILL MODEL (in red):

|      | tp       | ga   | gw   |
|------|----------|------|------|
| val: | 6.46e-07 | 2.79 | 3.26 |
| sd:  | NaN      | NaN  | NaN  |

GAIN-LOSS MODEL (in blue):

|      | tp       | ga     | gw   | la   | lw   |
|------|----------|--------|------|------|------|
| val: | 7.05e-07 | -0.152 | 1.14 | 0.12 | 4.67 |
| sd:  | NaN      | NaN    | NaN  | NaN  | NaN  |

|       | CNST   | HILL   | GNLS   |
|-------|--------|--------|--------|
| AIC:  | 440.17 | 426.95 | 430.95 |
| PROB: | 0      | 0.88   | 0.12   |
| RMSE: | 75.79  | 75.79  | 75.79  |

MAX\_MEAN: 6.93 MAX\_MED: 6.73 BMAD: 6.75

COFF: 20.3 HIT-CALL: 0 FITC: 13 ACTP: 1

FLAGS: 10

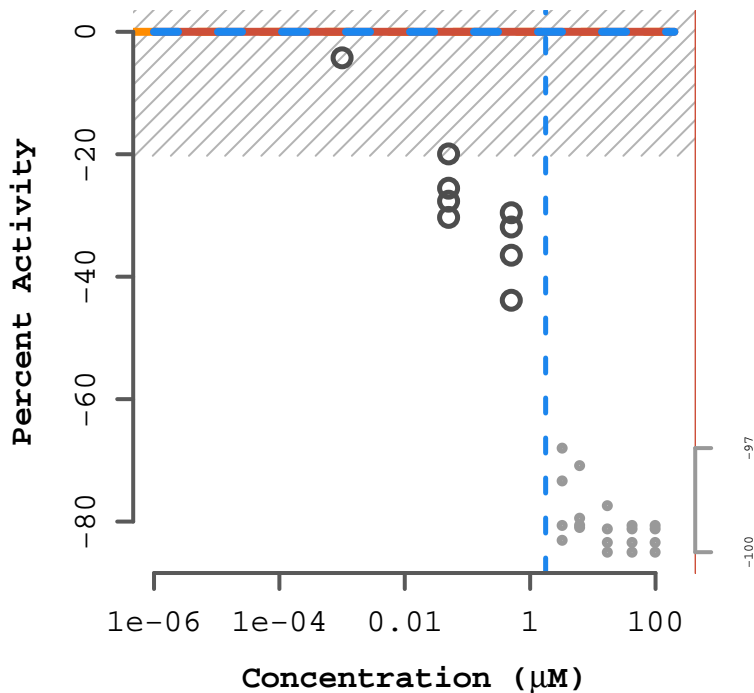

ASSAY: AEID3093 (CCTE\_Deisenroth\_DEVTOX\_RUES2-GLR\_Sox)

NAME: Dasatinib

CHID: 40979 CASRN: 302962-49-8

SPID(S): ES211\_26\_26

M4ID: 42675844 BRK

HILL MODEL (in red):

|      | tp       | ga   | gw   |
|------|----------|------|------|
| val: | 1.12e-07 | 2.66 | 1.03 |
| sd:  | NaN      | NaN  | NaN  |

GAIN-LOSS MODEL (in blue):

|      | tp       | ga    | gw   | la    | lw   |
|------|----------|-------|------|-------|------|
| val: | 2.44e-07 | 0.247 | 2.65 | 0.508 | 4.95 |
| sd:  | NaN      | NaN   | NaN  | NaN   | NaN  |

|       | CNST   | HILL   | GNLS   |
|-------|--------|--------|--------|
| AIC:  | 432.03 | 428.43 | 432.43 |
| PROB: | 0.13   | 0.77   | 0.1    |
| RMSE: | 76.76  | 76.76  | 76.76  |

MAX\_MEAN: 5.98 MAX\_MED: 3.77 BMAD: 6.75

COFF: 20.3 HIT-CALL: 0 FITC: 13 ACTP: 0.87

FLAGS: 10

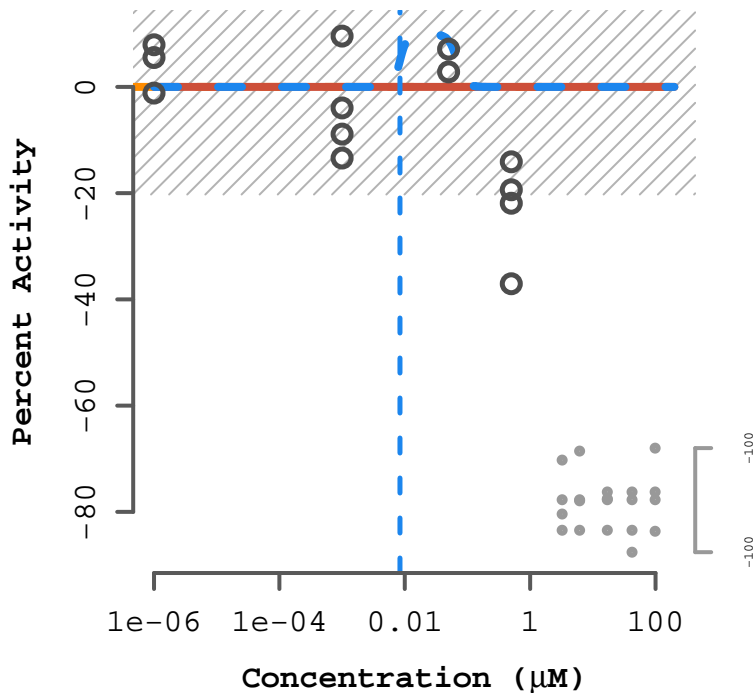

ASSAY: AEID3093 (CCTE\_Deisenroth\_DEVTOX\_RUES2-GLR\_Sox)

NAME: Sorafenib

CHID: 41128 CASRN: 284461-73-0

SPID(S): ES211\_57\_57

M4ID: 42675902 BRK

HILL MODEL (in red):

|      | tp       | ga   | gw   |
|------|----------|------|------|
| val: | 0.000281 | 2.78 | 5.33 |
| sd:  | NaN      | NaN  | NaN  |

GAIN-LOSS MODEL (in blue):

|      | tp   | ga    | gw    | la    | lw   |
|------|------|-------|-------|-------|------|
| val: | 9.88 | -2.08 | 7.87  | -1.17 | 6.56 |
| sd:  | 531  | 2840  | 24300 | 27.7  | 632  |

|       | CNST   | HILL  | GNLS   |
|-------|--------|-------|--------|
| AIC:  | 501.52 | 427.5 | 431.42 |
| PROB: | 0      | 0.88  | 0.12   |
| RMSE: | 76.16  | 76.16 | 76.11  |

MAX\_MEAN: 8.73 MAX\_MED: 9.19 BMAD: 6.75

COFF: 20.3 HIT-CALL: 0 FITC: 13 ACTP: 1

FLAGS: 10



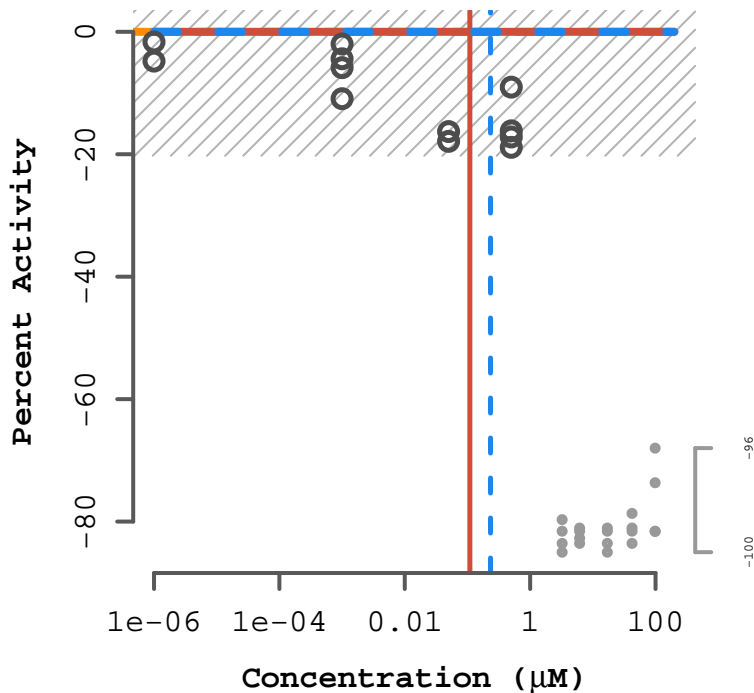

ASSAY: AEID3093 (CCTE\_Deisenroth\_DEVTOX\_RUES2-GLR\_Sox)

NAME: Sunitinib malate

CHID: 46492 CASRN: 341031-54-7

SPID(S): ES211\_60\_60

M4ID: 42675901 BRK

HILL MODEL (in red):

|      | tp       | ga     | gw    |
|------|----------|--------|-------|
| val: | 2.65e-09 | -0.962 | 0.629 |
| sd:  | NaN      | NaN    | NaN   |

GAIN-LOSS MODEL (in blue):

|      | tp       | ga     | gw    | la  | lw   |
|------|----------|--------|-------|-----|------|
| val: | 5.43e-09 | -0.632 | 0.434 | 1.5 | 5.09 |
| sd:  | NaN      | NaN    | NaN   | NaN | NaN  |

|       | CNST   | HILL   | GNLS   |
|-------|--------|--------|--------|
| AIC:  | 446.04 | 426.88 | 430.88 |
| PROB: | 0      | 0.88   | 0.12   |
| RMSE: | 75.66  | 75.66  | 75.66  |

MAX\_MEAN: 0.538 MAX\_MED: 0.596 BMAD: 6.75

COFF: 20.3 HIT-CALL: 0 FITC: 13 ACTP: 1

FLAGS: 10

Percent Activity

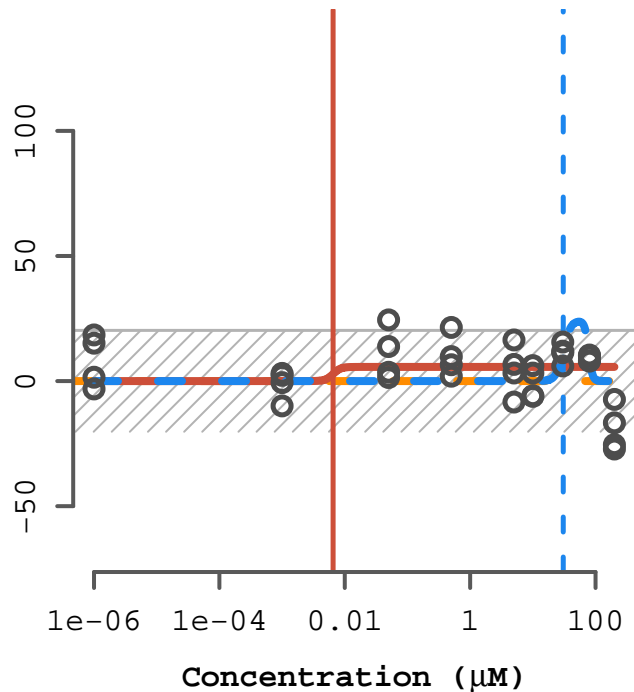

ASSAY: AEID3093 (CCTE\_Deisenroth\_DEVTOX\_RUES2-GLR\_Sox)

NAME: 5,5-Diphenylhydantoin

CHID: 20541 CASRN: 57-41-0

SPID(S): ES211\_3\_3

M4ID: 42675900

HILL MODEL (in red):

|      | tp   | ga    | gw  |
|------|------|-------|-----|
| val: | 5.66 | -2.19 | 7.3 |
| sd:  | 1.94 | 76.2  | 655 |

GAIN-LOSS MODEL (in blue):

|      | tp   | ga   | gw   | la   | lw   |
|------|------|------|------|------|------|
| val: | 24.2 | 1.49 | 7.39 | 1.89 | 14.1 |
| sd:  | NaN  | NaN  | NaN  | NaN  | NaN  |

|       | CNST   | HILL   | GNLS   |
|-------|--------|--------|--------|
| AIC:  | 285.71 | 284.82 | 285.26 |
| PROB: | 0.26   | 0.41   | 0.33   |
| RMSE: | 12.05  | 11.73  | 11.03  |

MAX\_MEAN: 11.2 MAX\_MED: 11.7 BMAD: 6.75

COFF: 20.3 HIT-CALL: 0 FITC: 16 ACTP: 0.74

FLAGS: 12

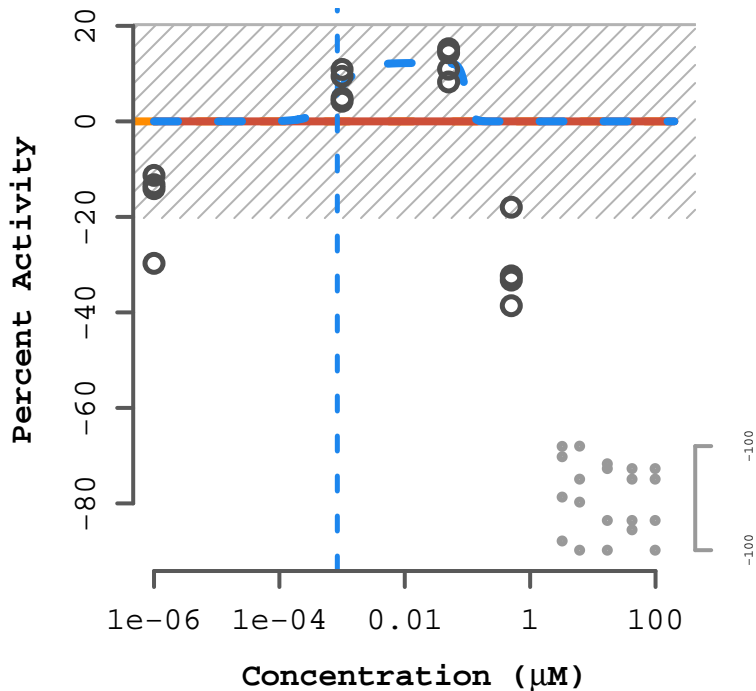

ASSAY: AEID3093 (CCTE\_Deisenroth\_DEVTOX\_RUES2-GLR\_Sox)

NAME: Cytarabine hydrochloride

CHID: 24891 CASRN: 69-74-9

SPID(S): ES211\_25\_25

M4ID: 42675886 BRK

HILL MODEL (in red):

|      | tp   | ga  | gw   |
|------|------|-----|------|
| val: | 18.3 | 2.8 | 7.41 |
| sd:  | NaN  | NaN | NaN  |

GAIN-LOSS MODEL (in blue):

|      | tp   | ga    | gw   | la    | lw   |
|------|------|-------|------|-------|------|
| val: | 12.2 | -3.08 | 2.35 | -1.02 | 9.02 |
| sd:  | 334  | 25.6  | 725  | 308   | 3910 |

|       | CNST  | HILL   | GNLS   |
|-------|-------|--------|--------|
| AIC:  | 512.8 | 428.35 | 432.14 |
| PROB: | 0     | 0.87   | 0.13   |
| RMSE: | 76.84 | 76.84  | 76.69  |

MAX\_MEAN: 12.2 MAX\_MED: 12.7 BMAD: 6.75

COFF: 20.3 HIT-CALL: 0 FITC: 18 ACTP: 1

FLAGS: 10; 12

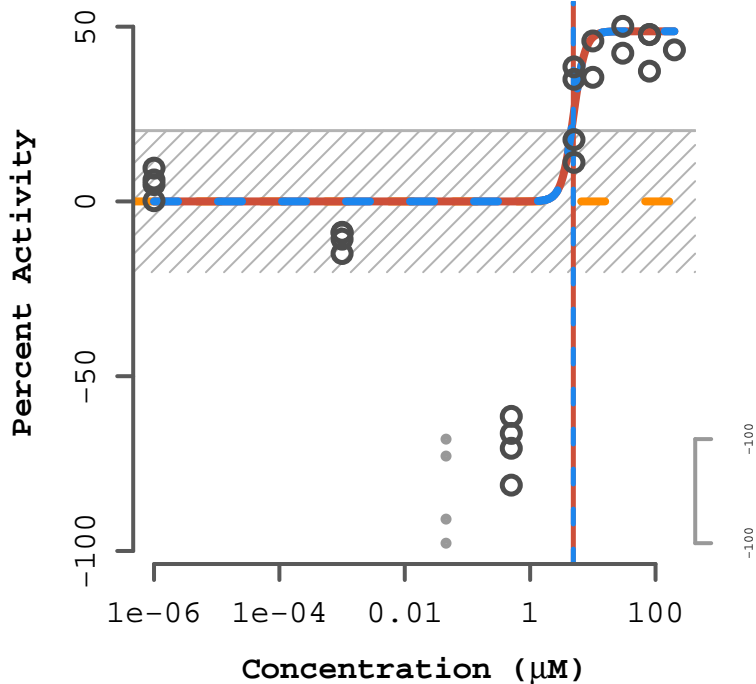

ASSAY: AEID3093 (CCTE\_Deisenroth\_DEVTOX\_RUES2-GLR\_Sox)

NAME: Adriamycin hydrochloride

CHID: 30636 CASRN: 25316-40-9

SPID(S): ES211\_67\_67

M4ID: 42675872 BRK

HILL MODEL (in red):

|      | tp   | ga     | gw   |
|------|------|--------|------|
| val: | 48.7 | 0.689  | 4.61 |
| sd:  | 5.54 | 0.0868 | 9.21 |

GAIN-LOSS MODEL (in blue):

|      | tp   | ga    | gw   | la  | lw   |
|------|------|-------|------|-----|------|
| val: | 48.7 | 0.689 | 4.61 | 4.2 | 8.17 |
| sd:  | NA   | NA    | NA   | NA  | NA   |

|       | CNST   | HILL   | GNLS   |
|-------|--------|--------|--------|
| AIC:  | 394.89 | 367.26 | 371.26 |
| PROB: | 0      | 0.88   | 0.12   |
| RMSE: | 53.29  | 41.67  | 41.67  |

MAX\_MEAN: 50.4 MAX\_MED: 51.7 BMAD: 6.75

COFF: 20.3 HIT-CALL: 1 FITC: 41 ACTP: 1

FLAGS: 10; 17
