# Supplementary material for: The DevTox Germ Layer Reporter Platform: An Assay Adaptation of the Human Pluripotent Stem Cell Test
Source: MDPI journal article supplement (doi:10.3390/toxics10070392), 2022-07-13
Supplement: s1 [file s1]

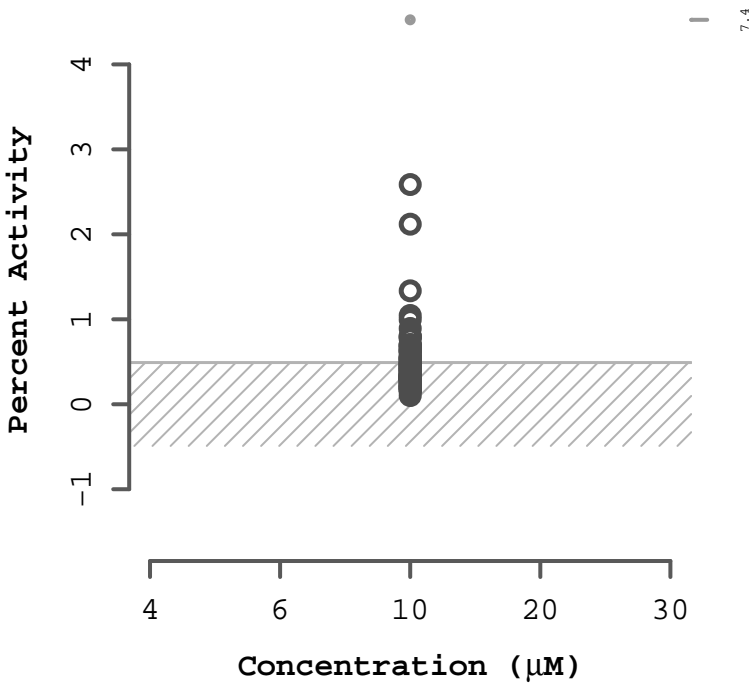

ASSAY: AEID3095 (CCTE\_Deisenroth\_DEVTOX\_RUES2-GLR\_Sox:

NAME: SB-431542

CHID: 42693 CASRN: 301836-41-9

SPID(S): ES211\_56\_56

M4ID: 42675976 BRK

HILL MODEL: Not applicable.

GAIN-LOSS MODEL: Not applicable.

|       | CNST | HILL | GNLS |
|-------|------|------|------|
| AIC:  | NA   | NA   | NA   |
| PROB: | NA   | NA   | NA   |
| RMSE: | NA   | NA   | NA   |

MAX\_MEAN: 0.547 MAX\_MED: 0.394 BMAD: 0.164

COFF: 0.491 HIT-CALL: -1 FITC: 2 ACTP: NA

FLAGS:

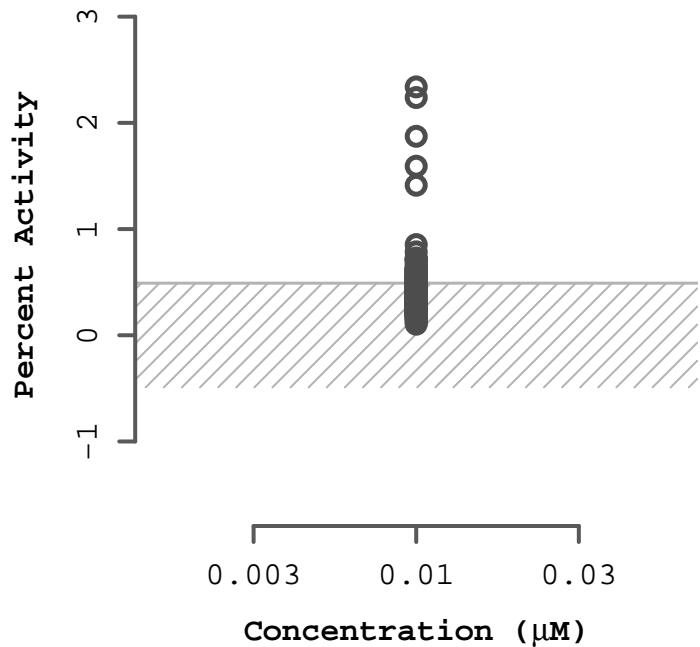

ASSAY: AEID3095 (CCTE\_Deisenroth\_DEVTOX\_RUES2-GLR\_Sox:

NAME: DMSO (spid not in DB)

CHID: NA CASRN: NA

SPID(S): DMSO

M4ID: 42675979

HILL MODEL: Not applicable.

GAIN-LOSS MODEL: Not applicable.

|       | CNST | HILL | GNLS |
|-------|------|------|------|
| AIC:  | NA   | NA   | NA   |
| PROB: | NA   | NA   | NA   |
| RMSE: | NA   | NA   | NA   |

MAX\_MEAN: 0.432 MAX\_MED: 0.387 BMAD: 0.164

COFF: 0.491 HIT-CALL: -1 FITC: 2 ACTP: NA

FLAGS:

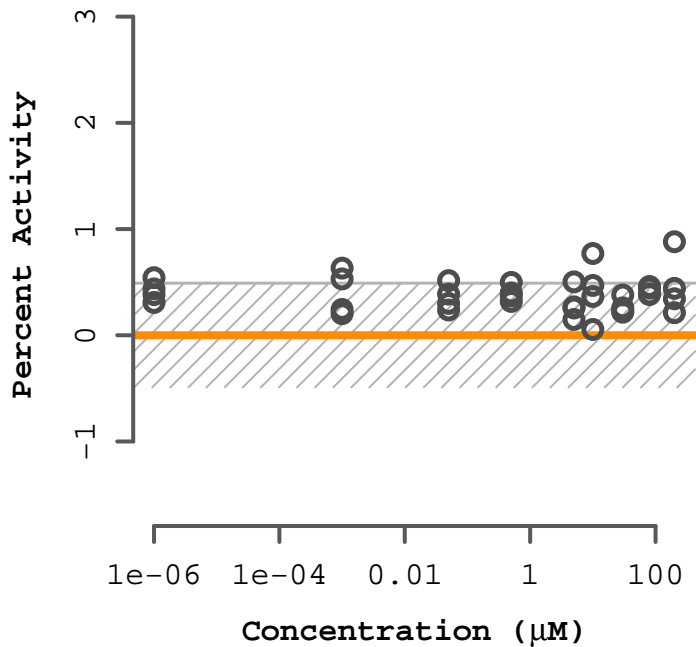

ASSAY: AEID3095 (CCTE\_Deisenroth\_DEVTOX\_RUES2-GLR\_Sox:

NAME: Acrylamide

CHID: 20027 CASRN: 79-06-1

SPID(S): ES211\_10\_10

M4ID: 42676034

HILL MODEL: Not applicable.

GAIN-LOSS MODEL: Not applicable.

|       |       |      |      |
|-------|-------|------|------|
|       | CNST  | HILL | GNLS |
| AIC:  | 47.06 | NA   | NA   |
| PROB: | 1     | NA   | NA   |
| RMSE: | 0.42  | NA   | NA   |

MAX\_MEAN: 0.47 MAX\_MED: 0.417 BMAD: 0.164

COFF: 0.491 HIT-CALL: 0 FITC: 4 ACTP: 0

FLAGS:

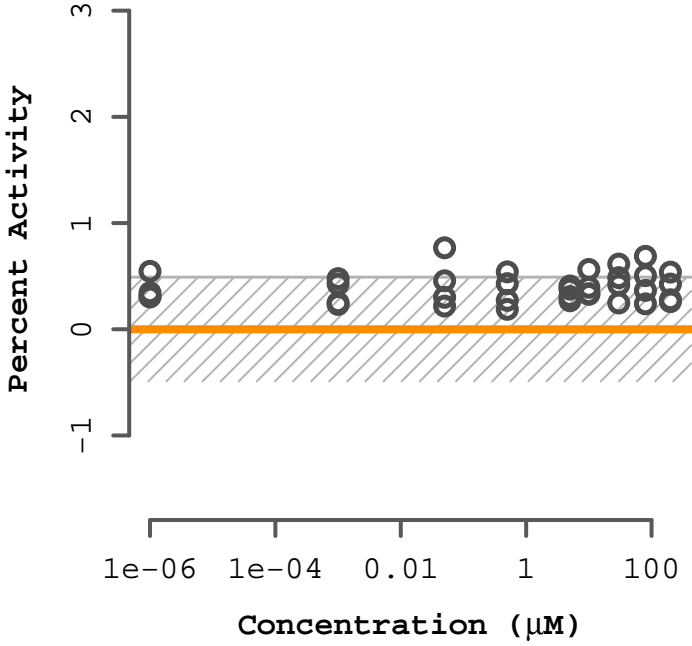

ASSAY: AEID3095 (CCTE\_Deisenroth\_DEVTOX\_RUES2-GLR\_Sox:

NAME: Boric acid ( $\text{H}_3\text{BO}_3$ )  
CHID: 20194 CASRN: 10043-35-3  
SPID(S): ES211\_17\_17  
M4ID: 42676001

HILL MODEL: Not applicable.

GAIN-LOSS MODEL: Not applicable.

|       | CNST  | HILL | GNLS |
|-------|-------|------|------|
| AIC:  | 47.77 | NA   | NA   |
| PROB: | 1     | NA   | NA   |
| RMSE: | 0.42  | NA   | NA   |

MAX\_MEAN: 0.45      MAX\_MED: 0.453      BMAD: 0.164

COFF: 0.491    HIT-CALL: 0    FITC: 4    ACTP: 0

FLAGS:

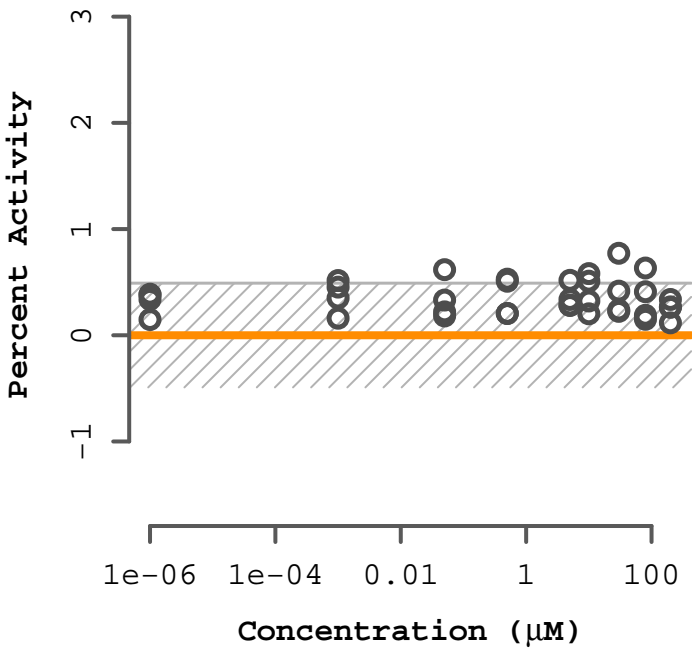

ASSAY: AEID3095 (CCTE\_Deisenroth\_DEVTOX\_RUES2-GLR\_Sox:

NAME: Caffeine

CHID: 20232 CASRN: 58-08-2

SPID(S): ES211\_20\_20

M4ID: 42676002

HILL MODEL: Not applicable.

GAIN-LOSS MODEL: Not applicable.

|       |       |      |      |
|-------|-------|------|------|
|       | CNST  | HILL | GNLS |
| AIC:  | 41.07 | NA   | NA   |
| PROB: | 1     | NA   | NA   |
| RMSE: | 0.38  | NA   | NA   |

MAX\_MEAN: 0.413 MAX\_MED: 0.416 BMAD: 0.164

COFF: 0.491 HIT-CALL: 0 FITC: 4 ACTP: 0

FLAGS:

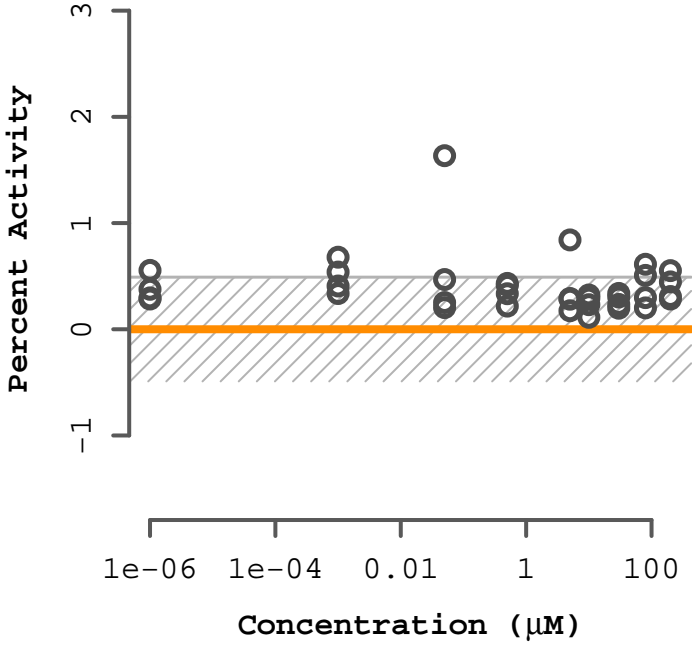

ASSAY: AEID3095 (CCTE\_Deisenroth\_DEVTOX\_RUES2-GLR\_Sox:

NAME: Thalidomide

CHID: 22524 CASRN: 50-35-1

SPID(S): ES211\_62\_62

M4ID: 42676014

HILL MODEL: Not applicable.

GAIN-LOSS MODEL: Not applicable.

|       |       |      |      |
|-------|-------|------|------|
|       | CNST  | HILL | GNLS |
| AIC:  | 50.29 | NA   | NA   |
| PROB: | 1     | NA   | NA   |
| RMSE: | 0.47  | NA   | NA   |

MAX\_MEAN: 0.64 MAX\_MED: 0.473 BMAD: 0.164

COFF: 0.491 HIT-CALL: 0 FITC: 4 ACTP: 0

FLAGS:

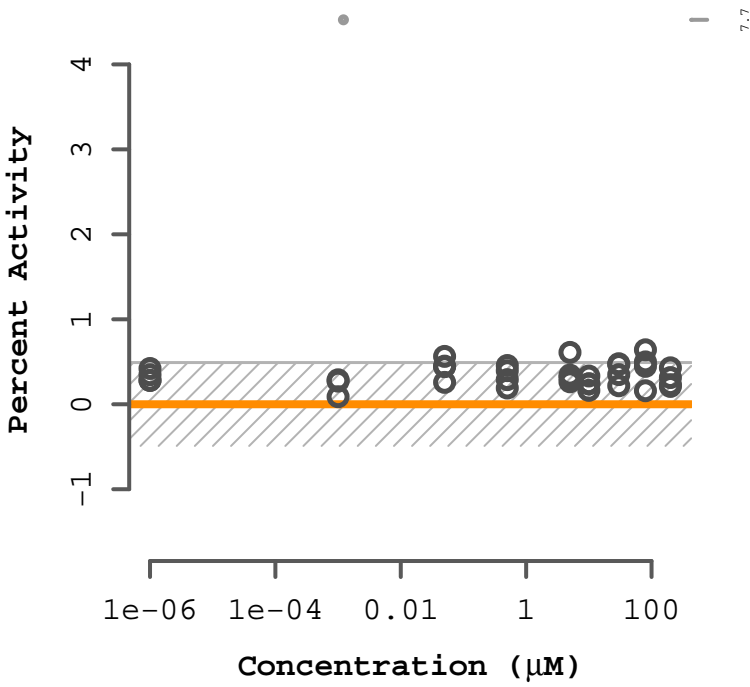

ASSAY: AEID3095 (CCTE\_Deisenroth\_DEVTOX\_RUES2-GLR\_Sox:

NAME: Acyclovir

CHID: 22556 CASRN: 59277-89-3

SPID(S): ES211\_12\_12

M4ID: 42675982 BRK

HILL MODEL: Not applicable.

GAIN-LOSS MODEL: Not applicable.

|       | CNST  | HILL | GNLS |
|-------|-------|------|------|
| AIC:  | 61.14 | NA   | NA   |
| PROB: | 1     | NA   | NA   |
| RMSE: | 1.33  | NA   | NA   |

MAX\_MEAN: 2.09 MAX\_MED: 0.473 BMAD: 0.164

COFF: 0.491 HIT-CALL: 0 FITC: 4 ACTP: 0

FLAGS: 10

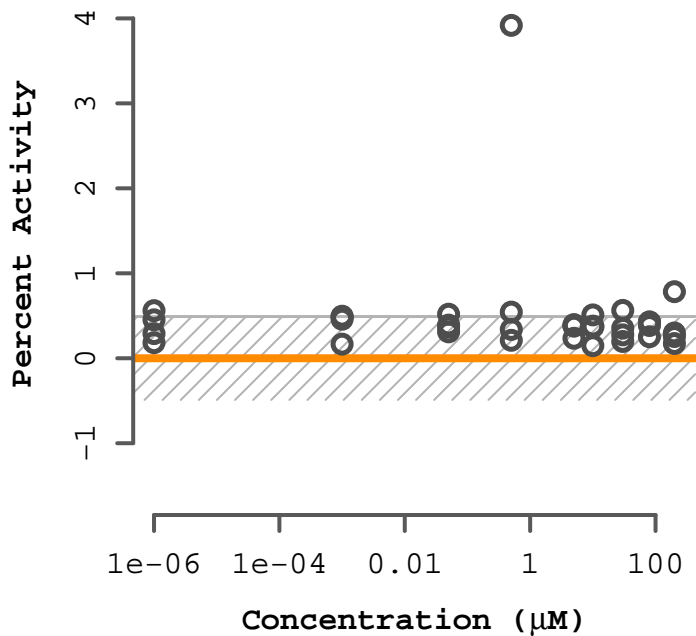

ASSAY: AEID3095 (CCTE\_Deisenroth\_DEVTOX\_RUES2-GLR\_Sox:

NAME: Valproic acid

CHID: 23733 CASRN: 99-66-1

SPID(S): ES211\_63\_63

M4ID: 42676018

HILL MODEL: Not applicable.

GAIN-LOSS MODEL: Not applicable.

|       |       |      |      |
|-------|-------|------|------|
|       | CNST  | HILL | GNLS |
| AIC:  | 59.36 | NA   | NA   |
| PROB: | 1     | NA   | NA   |
| RMSE: | 0.76  | NA   | NA   |

MAX\_MEAN: 1.25 MAX\_MED: 0.475 BMAD: 0.164

COFF: 0.491 HIT-CALL: 0 FITC: 4 ACTP: 0

FLAGS: 10



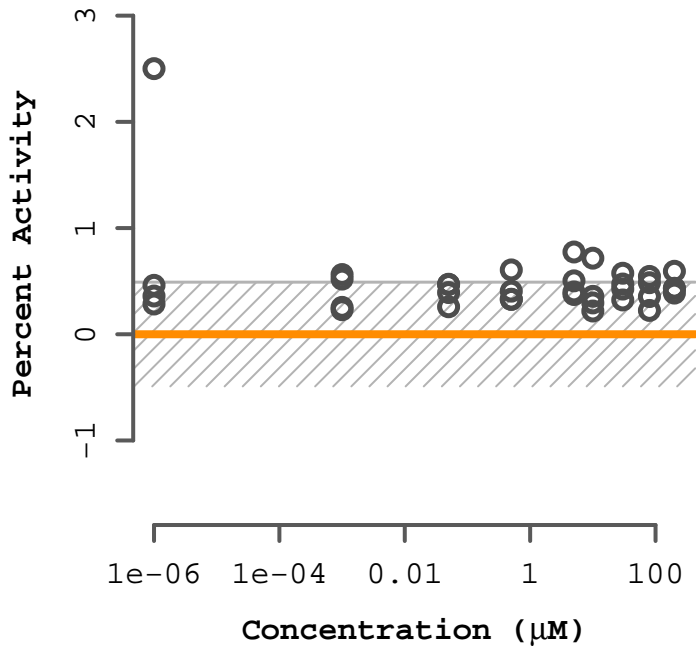

ASSAY: AEID3095 (CCTE\_Deisenroth\_DEVTOX\_RUES2-GLR\_Sox:

NAME: D-Camphor

CHID: 24721 CASRN: 464-49-3

SPID(S): ES211\_27\_27

M4ID: 42676032

HILL MODEL: Not applicable.

GAIN-LOSS MODEL: Not applicable.

|       |       |      |      |
|-------|-------|------|------|
|       | CNST  | HILL | GNLS |
| AIC:  | 62.84 | NA   | NA   |
| PROB: | 1     | NA   | NA   |
| RMSE: | 0.6   | NA   | NA   |

MAX\_MEAN: 0.902 MAX\_MED: 0.451 BMAD: 0.164

COFF: 0.491 HIT-CALL: 0 FITC: 4 ACTP: 0

FLAGS: 10

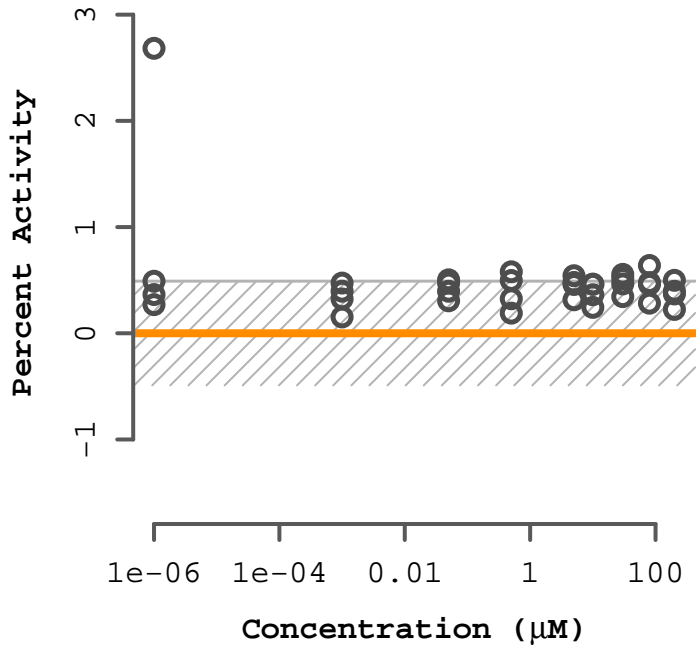

ASSAY: AEID3095 (CCTE\_Deisenroth\_DEVTOX\_RUES2-GLR\_Sox:

NAME: Cyclophosphamide monohydrate

CHID: 24888 CASRN: 6055-19-2

SPID(S): ES211\_24\_24

M4ID: 42675991

HILL MODEL: Not applicable.

GAIN-LOSS MODEL: Not applicable.

|       |       |      |      |
|-------|-------|------|------|
|       | CNST  | HILL | GNLS |
| AIC:  | 60.94 | NA   | NA   |
| PROB: | 1     | NA   | NA   |
| RMSE: | 0.61  | NA   | NA   |

MAX\_MEAN: 0.952 MAX\_MED: 0.491 BMAD: 0.164

COFF: 0.491 HIT-CALL: 0 FITC: 4 ACTP: 0

FLAGS: 10

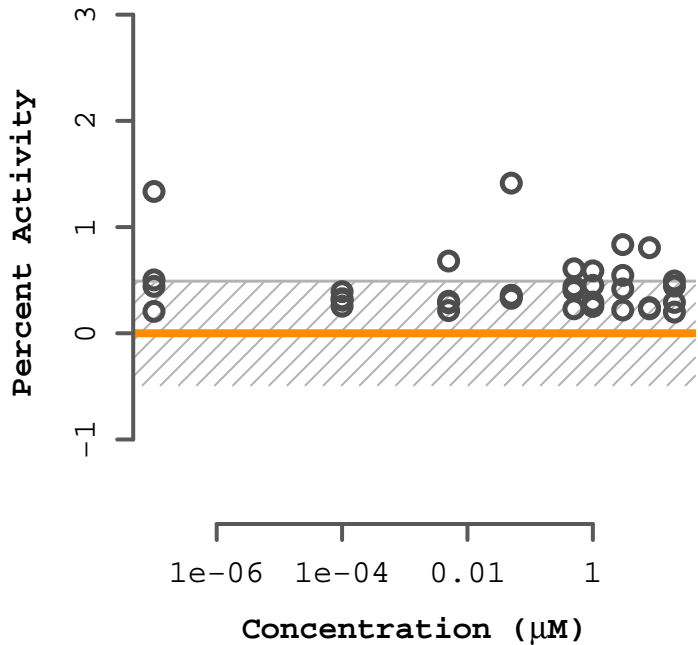

ASSAY: AEID3095 (CCTE\_Deisenroth\_DEVTOX\_RUES2-GLR\_Sox:

NAME: Dexamethasone sodium phosphate

CHID: 47429 CASRN: 2392-39-4

SPID(S): ES211\_28\_28

M4ID: 42675983

HILL MODEL: Not applicable.

GAIN-LOSS MODEL: Not applicable.

|       |       |      |      |
|-------|-------|------|------|
|       | CNST  | HILL | GNLS |
| AIC:  | 58.18 | NA   | NA   |
| PROB: | 1     | NA   | NA   |
| RMSE: | 0.53  | NA   | NA   |

MAX\_MEAN: 0.622 MAX\_MED: 0.482 BMAD: 0.164

COFF: 0.491 HIT-CALL: 0 FITC: 4 ACTP: 0

FLAGS: 10

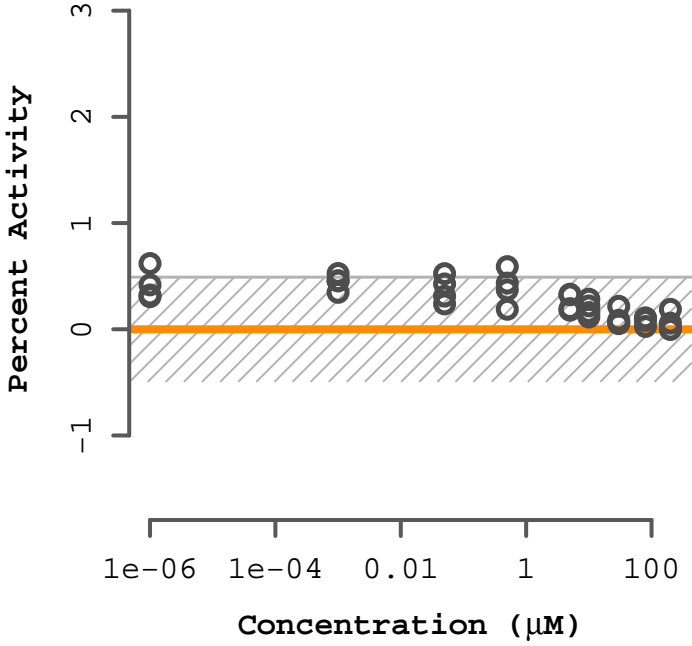

ASSAY: AEID3095 (CCTE\_Deisenroth\_DEVTOX\_RUES2-GLR\_Sox:

NAME: (2R,3S)-2-(3,4-Dihydroxyphenyl)-3,4-dihydro-2H-

CHID: 1017388 CASRN: 225937-10-0

SPID(S): ES211\_22\_22

M4ID: 42676008

HILL MODEL: Not applicable.

GAIN-LOSS MODEL: Not applicable.

|       |       |      |      |
|-------|-------|------|------|
|       | CNST  | HILL | GNLS |
| AIC:  | 24.33 | NA   | NA   |
| PROB: | 1     | NA   | NA   |
| RMSE: | 0.31  | NA   | NA   |

MAX\_MEAN: 0.447      MAX\_MED: 0.456      BMAD: 0.164

COFF: 0.491    HIT-CALL: 0      FITC: 4      ACTP: 0

FLAGS:

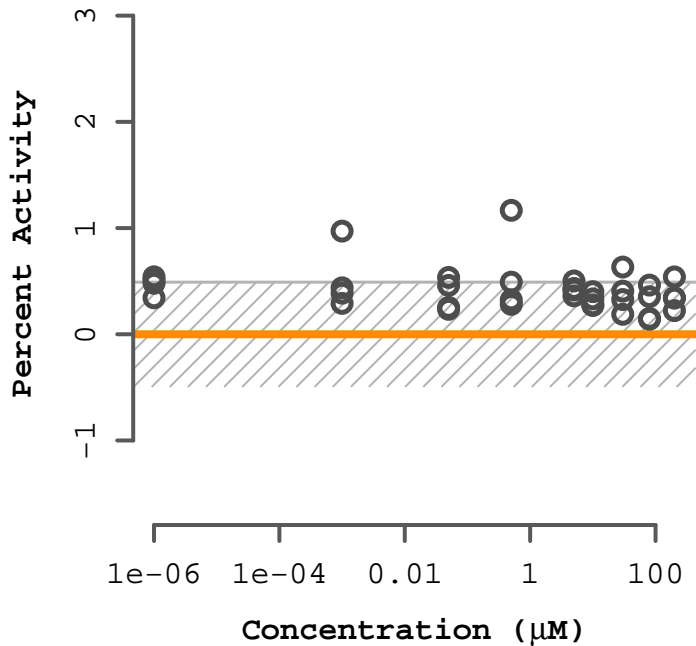

ASSAY: AEID3095 (CCTE\_Deisenroth\_DEVTOX\_RUES2-GLR\_Sox:

NAME: Warfarin

CHID: 23742 CASRN: 81-81-2

SPID(S): ES211\_65\_65

M4ID: 42675989

HILL MODEL: Failed to converge.

GAIN-LOSS MODEL: Failed to converge.

|       |       |      |      |
|-------|-------|------|------|
|       | CNST  | HILL | GNLS |
| AIC:  | 52.25 | NA   | NA   |
| PROB: | 1     | NA   | NA   |
| RMSE: | 0.46  | NA   | NA   |

MAX\_MEAN: 0.566 MAX\_MED: 0.495 BMAD: 0.164

COFF: 0.491 HIT-CALL: 0 FITC: 7 ACTP: 0

FLAGS:

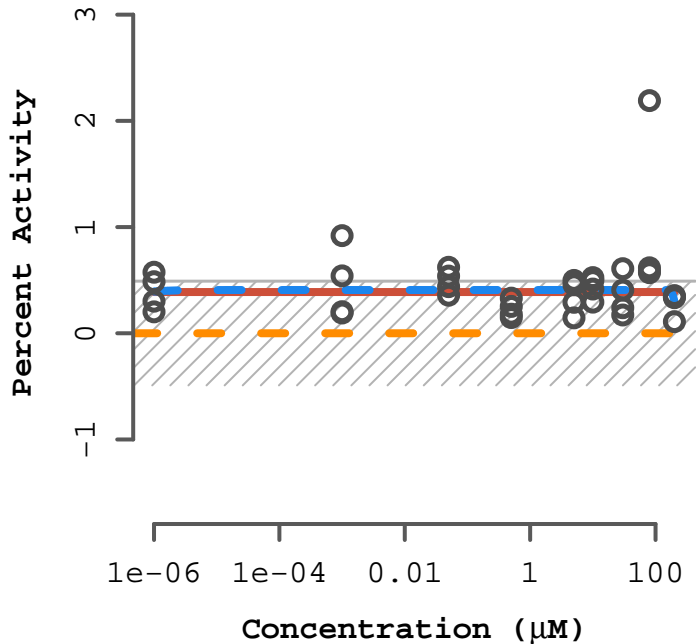

ASSAY: AEID3095 (CCTE\_Deisenroth\_DEVTOX\_RUES2-GLR\_Sox)

NAME: Acetaminophen

CHID: 20006 CASRN: 103-90-2

SPID(S): ES211\_9\_9

M4ID: 42676004

HILL MODEL (in red):

|      | tp    | ga    | gw   |
|------|-------|-------|------|
| val: | 0.388 | -6.87 | 7.68 |
| sd:  | NaN   | NaN   | NaN  |

GAIN-LOSS MODEL (in blue):

|      | tp     | ga    | gw   | la     | lw   |
|------|--------|-------|------|--------|------|
| val: | 0.407  | -6.85 | 1.67 | 2.33   | 16.4 |
| sd:  | 0.0388 | 129   | 254  | 0.0333 | 21.4 |

|       | CNST  | HILL | GNLS |
|-------|-------|------|------|
| AIC:  | 58.94 | 5.06 | 7.57 |
| PROB: | 0     | 0.78 | 0.22 |
| RMSE: | 0.56  | 0.35 | 0.34 |

MAX\_MEAN: 0.992 MAX\_MED: 0.603 BMAD: 0.164

COFF: 0.491 HIT-CALL: 0 FITC: 15 ACTP: 1

FLAGS: 12

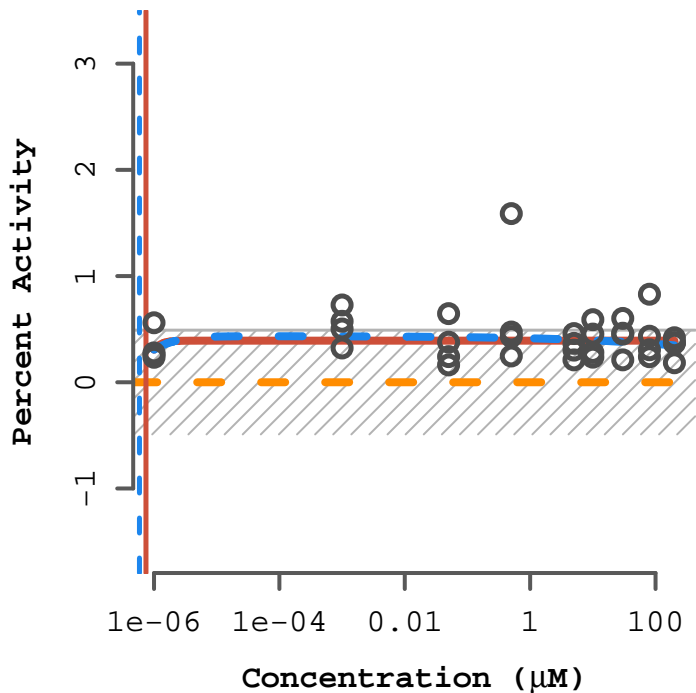

ASSAY: AEID3095 (CCTE\_Deisenroth\_DEVTOX\_RUES2-GLR\_Sox:

NAME: Isoniazid

CHID: 20755 CASRN: 54-85-3

SPID(S): ES211\_39\_39

M4ID: 42675985

HILL MODEL (in red):

|      | tp     | ga    | gw   |
|------|--------|-------|------|
| val: | 0.392  | -6.13 | 4.36 |
| sd:  | 0.0302 | 0.718 | 24.7 |

GAIN-LOSS MODEL (in blue):

|      | tp    | ga    | gw   | la   | lw  |
|------|-------|-------|------|------|-----|
| val: | 0.435 | -6.23 | 1.64 | 4.29 | 0.3 |
| sd:  | NaN   | NaN   | NaN  | NaN  | NaN |

|       | CNST | HILL  | GNLS  |
|-------|------|-------|-------|
| AIC:  | 55.7 | -7.19 | -3.96 |
| PROB: | 0    | 0.83  | 0.17  |
| RMSE: | 0.5  | 0.25  | 0.25  |

MAX\_MEAN: 0.685 MAX\_MED: 0.538 BMAD: 0.164

COFF: 0.491 HIT-CALL: 0 FITC: 15 ACTP: 1

FLAGS: 12

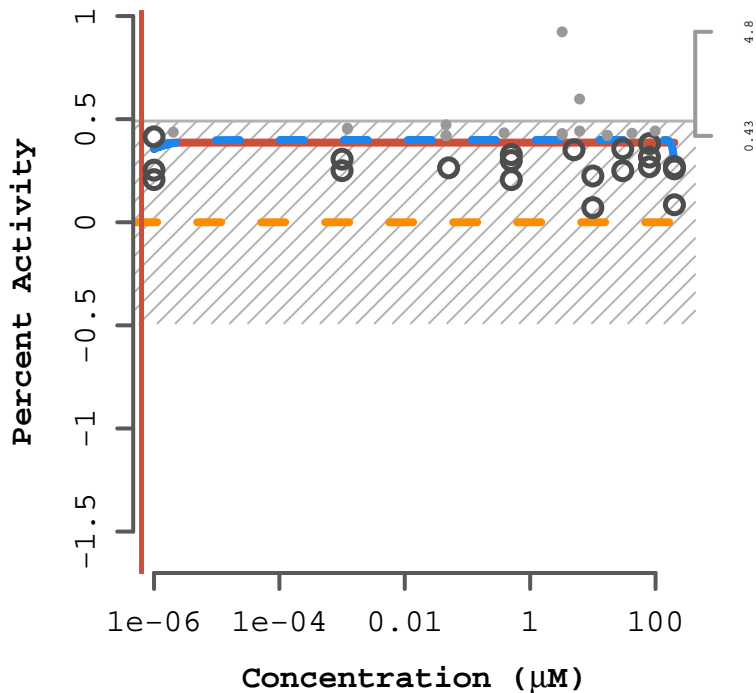

ASSAY: AEID3095 (CCTE\_Deisenroth\_DEVTOX\_RUES2-GLR\_Sox:

NAME: Stavudine

CHID: 23819 CASRN: 3056-17-5

SPID(S): ES211\_58\_58

M4ID: 42676038 BRK

HILL MODEL (in red):

|      | tp    | ga   | gw   |
|------|-------|------|------|
| val: | 0.386 | -6.2 | 5.33 |
| sd:  | NaN   | NaN  | NaN  |

GAIN-LOSS MODEL (in blue):

|      | tp     | ga    | gw   | la     | lw   |
|------|--------|-------|------|--------|------|
| val: | 0.399  | -6.56 | 1.62 | 2.32   | 17.8 |
| sd:  | 0.0401 | 24.1  | 69.7 | 0.0326 | 28.7 |

|       | CNST  | HILL | GNLS  |
|-------|-------|------|-------|
| AIC:  | 74.35 | 29.3 | 32.22 |
| PROB: | 0     | 0.81 | 0.19  |
| RMSE: | 0.97  | 0.8  | 0.8   |

MAX\_MEAN: 1.54 MAX\_MED: 0.512 BMAD: 0.164

COFF: 0.491 HIT-CALL: 0 FITC: 15 ACTP: 1

FLAGS: 8; 10; 12



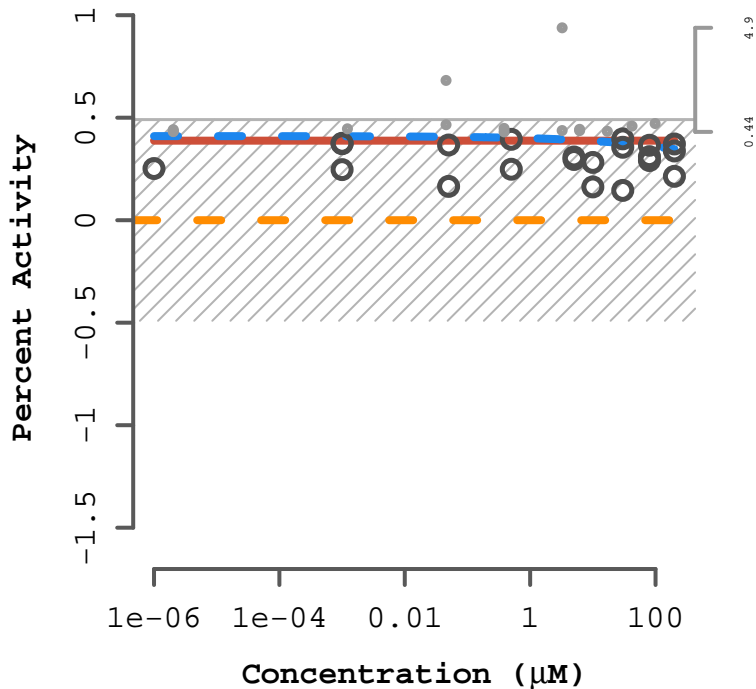

ASSAY: AEID3095 (CCTE\_Deisenroth\_DEVTOX\_RUES2-GLR\_Sox:

NAME: Hydroxyurea

CHID: 25438 CASRN: 127-07-1

SPID(S): ES211\_35\_35

M4ID: 42676007 BRK

HILL MODEL (in red):

|      | tp     | ga    | gw   |
|------|--------|-------|------|
| val: | 0.388  | -6.95 | 7.58 |
| sd:  | 0.0301 | 226   | 1460 |

GAIN-LOSS MODEL (in blue):

|      | tp     | ga    | gw   | la   | lw    |
|------|--------|-------|------|------|-------|
| val: | 0.41   | -6.83 | 7.38 | 4.3  | 0.368 |
| sd:  | 0.0615 | 100   | 722  | 4.35 | 0.859 |

|       | CNST  | HILL  | GNLS |
|-------|-------|-------|------|
| AIC:  | 76.54 | 24.26 | 27.9 |
| PROB: | 0     | 0.86  | 0.14 |
| RMSE: | 1.02  | 0.86  | 0.85 |

MAX\_MEAN: 1.5 MAX\_MED: 0.557 BMAD: 0.164

COFF: 0.491 HIT-CALL: 0 FITC: 15 ACTP: 1

FLAGS: 10; 12

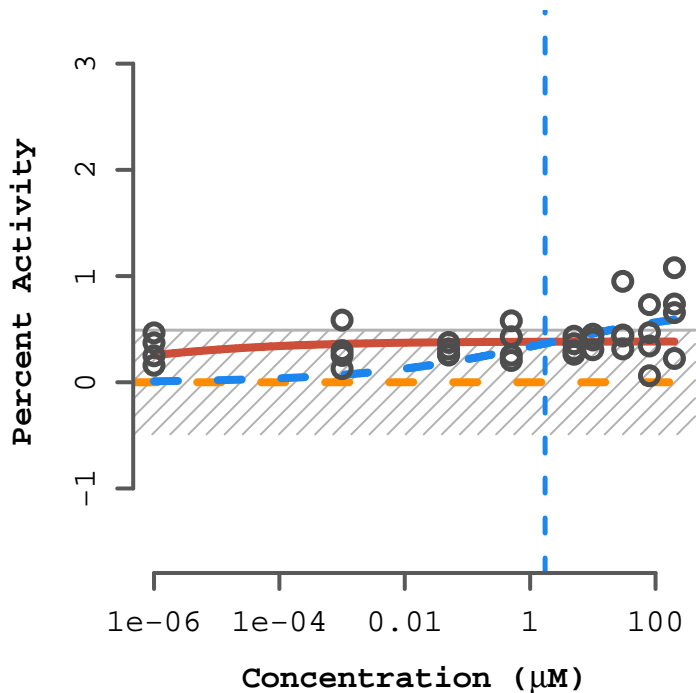

ASSAY: AEID3095 (CCTE\_Deisenroth\_DEVTOX\_RUES2-GLR\_Sox:

NAME: Lenalidomide

CHID: 46664 CASRN: 191732-72-6

SPID(S): ES211\_41\_41

M4ID: 42675993

HILL MODEL (in red):

|      | tp    | ga  | gw  |
|------|-------|-----|-----|
| val: | 0.384 | -7  | 0.3 |
| sd:  | NaN   | NaN | NaN |

GAIN-LOSS MODEL (in blue):

|      | tp    | ga    | gw  | la  | lw   |
|------|-------|-------|-----|-----|------|
| val: | 0.731 | 0.238 | 0.3 | 4.3 | 9.63 |
| sd:  | NA    | NA    | NA  | NA  | NA   |

|       | CNST | HILL | GNLS  |
|-------|------|------|-------|
| AIC:  | 52.1 | -7   | 10.87 |
| PROB: | 0    | 1    | 0     |
| RMSE: | 0.46 | 0.21 | 0.23  |

MAX\_MEAN: 0.674 MAX\_MED: 0.697 BMAD: 0.164

COFF: 0.491 HIT-CALL: 0 FITC: 16 ACTP: 1

FLAGS: 12

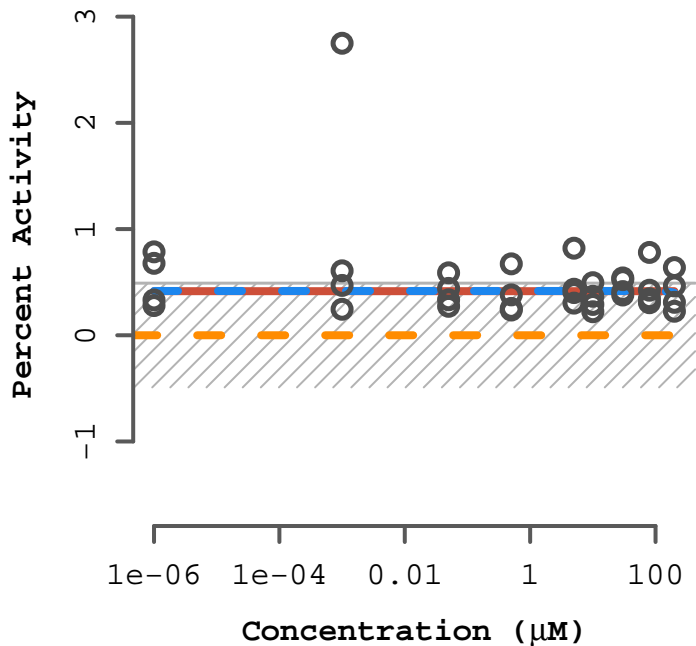

ASSAY: AEID3095 (CCTE\_Deisenroth\_DEVTOX\_RUES2-GLR\_Sox:

NAME: Ethylene glycol

CHID: 20597 CASRN: 107-21-1

SPID(S): ES211\_32\_32

M4ID: 42676026

HILL MODEL (in red):

|      | tp     | ga  | gw   |
|------|--------|-----|------|
| val: | 0.415  | -7  | 6.97 |
| sd:  | 0.0306 | 233 | 1510 |

GAIN-LOSS MODEL (in blue):

|      | tp     | ga    | gw   | la   | lw   |
|------|--------|-------|------|------|------|
| val: | 0.417  | -6.97 | 7.95 | 2.64 | 3.94 |
| sd:  | 0.0328 | 412   | 2140 | 6.09 | 71   |

|       | CNST  | HILL | GNLS |
|-------|-------|------|------|
| AIC:  | 66.31 | 3.47 | 7.44 |
| PROB: | 0     | 0.88 | 0.12 |
| RMSE: | 0.65  | 0.42 | 0.42 |

MAX\_MEAN: 1.02 MAX\_MED: 0.539 BMAD: 0.164

COFF: 0.491 HIT-CALL: 0 FITC: 20 ACTP: 1

FLAGS: 8; 12

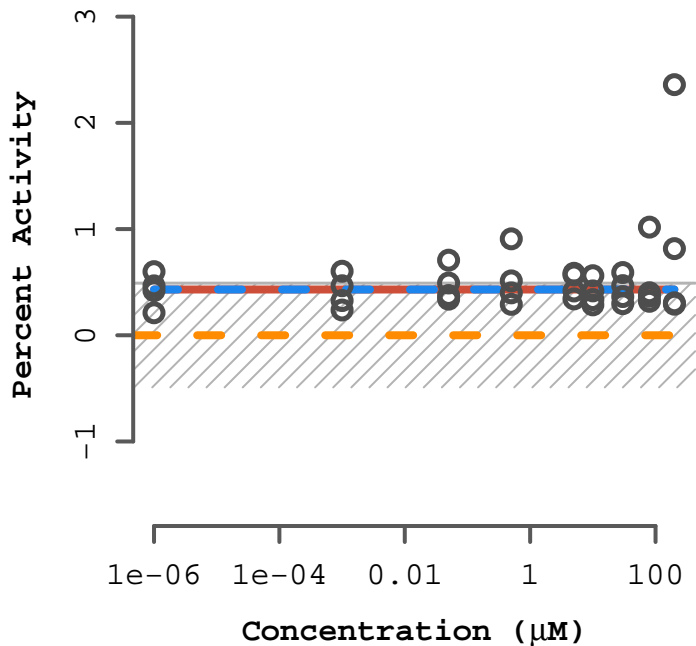

ASSAY: AEID3095 (CCTE\_Deisenroth\_DEVTOX\_RUES2-GLR\_Sox:

NAME: Ibuprofen

CHID: 20732 CASRN: 15687-27-1

SPID(S): ES211\_36\_36

M4ID: 42676025

HILL MODEL (in red):

|      | tp     | ga  | gw   |
|------|--------|-----|------|
| val: | 0.431  | -7  | 6.07 |
| sd:  | 0.0291 | 290 | 1690 |

GAIN-LOSS MODEL (in blue):

|      | tp    | ga | gw   | la   | lw   |
|------|-------|----|------|------|------|
| val: | 0.431 | -7 | 6.42 | 3.44 | 17.8 |
| sd:  | NA    | NA | NA   | NA   | NA   |

|       | CNST  | HILL | GNLS |
|-------|-------|------|------|
| AIC:  | 68.34 | 2.51 | 6.51 |
| PROB: | 0     | 0.88 | 0.12 |
| RMSE: | 0.63  | 0.37 | 0.37 |

MAX\_MEAN: 0.944 MAX\_MED: 0.561 BMAD: 0.164

COFF: 0.491 HIT-CALL: 0 FITC: 20 ACTP: 1

FLAGS: 8; 12

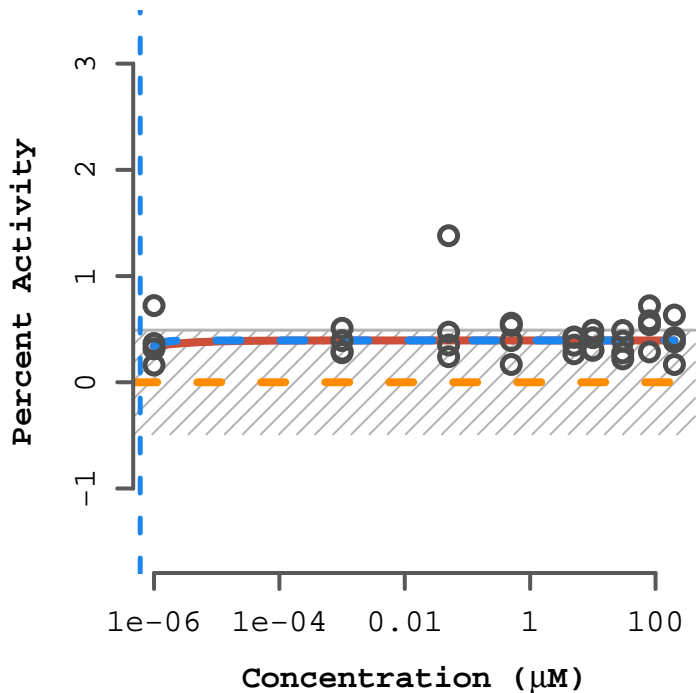

ASSAY: AEID3095 (CCTE\_Deisenroth\_DEVTOX\_RUES2-GLR\_Sox)

NAME: Nicotinic acid  
 CHID: 20932 CASRN: 59-67-6  
 SPID(S): ES211\_48\_48  
 M4ID: 42676024

HILL MODEL (in red):

|      | tp    | ga  | gw    |
|------|-------|-----|-------|
| val: | 0.394 | -7  | 0.793 |
| sd:  | NaN   | NaN | NaN   |

GAIN-LOSS MODEL (in blue):

|      | tp    | ga    | gw   | la  | lw   |
|------|-------|-------|------|-----|------|
| val: | 0.394 | -6.22 | 3.65 | 3.8 | 4.69 |
| sd:  | NaN   | NaN   | NaN  | NaN | NaN  |

|       | CNST  | HILL   | GNLS   |
|-------|-------|--------|--------|
| AIC:  | 54.25 | -15.04 | -11.04 |
| PROB: | 0     | 0.88   | 0.12   |
| RMSE: | 0.47  | 0.22   | 0.22   |

MAX\_MEAN: 0.611 MAX\_MED: 0.561 BMAD: 0.164

COFF: 0.491 HIT-CALL: 0 FITC: 20 ACTP: 1

FLAGS: 12

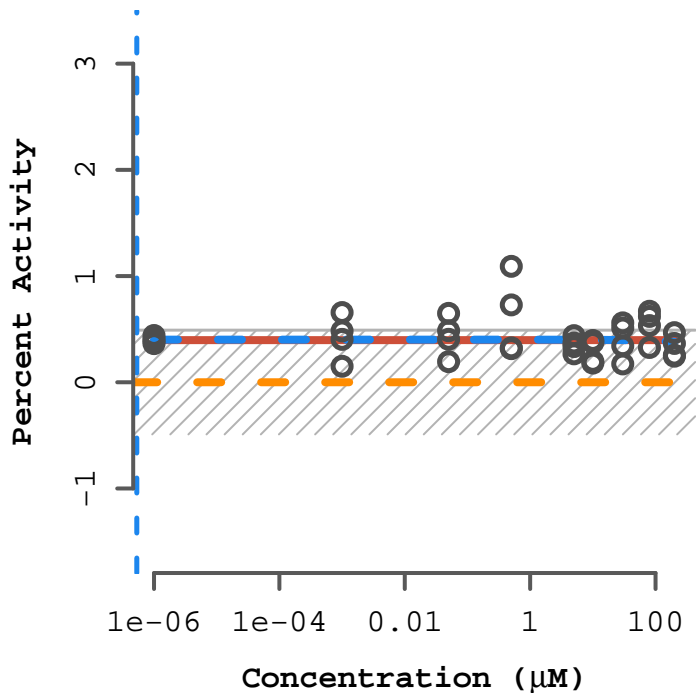

ASSAY: AEID3095 (CCTE\_Deisenroth\_DEVTOX\_RUES2-GLR\_Sox:

NAME: 1,2-Propylene glycol  
CHID: 21206 CASRN: 57-55-6  
SPID(S): ES211\_1\_1  
M4ID: 42675977

HILL MODEL (in red):

|      | tp     | ga  | gw   |
|------|--------|-----|------|
| val: | 0.397  | -7  | 6.18 |
| sd:  | 0.0268 | 266 | 1560 |

GAIN-LOSS MODEL (in blue):

|      | tp    | ga    | gw  | la   | lw    |
|------|-------|-------|-----|------|-------|
| val: | 0.401 | -6.27 | 8   | 3.74 | 0.866 |
| sd:  | NaN   | NaN   | NaN | NaN  | NaN   |

|       | CNST  | HILL   | GNLS   |
|-------|-------|--------|--------|
| AIC:  | 53.71 | -15.24 | -11.36 |
| PROB: | 0     | 0.87   | 0.13   |
| RMSE: | 0.46  | 0.19   | 0.19   |

MAX\_MEAN: 0.616 MAX\_MED: 0.577 BMAD: 0.164

COFF: 0.491 HIT-CALL: 0 FITC: 20 ACTP: 1

FLAGS: 8; 12

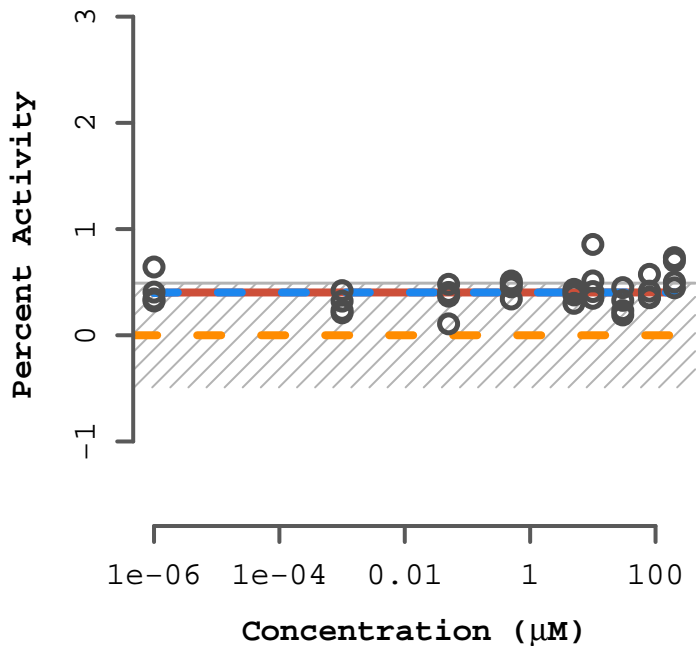

ASSAY: AEID3095 (CCTE\_Deisenroth\_DEVTOX\_RUES2-GLR\_Sox:

NAME: 6-Propyl-2-thiouracil

CHID: 21209 CASRN: 51-52-5

SPID(S): ES211\_8\_8

M4ID: 42675975

HILL MODEL (in red):

|      | tp    | ga    | gw   |
|------|-------|-------|------|
| val: | 0.403 | -6.71 | 2.58 |
| sd:  | NaN   | NaN   | NaN  |

GAIN-LOSS MODEL (in blue):

|      | tp     | ga    | gw   | la   | lw   |
|------|--------|-------|------|------|------|
| val: | 0.403  | -6.49 | 3.79 | 4.12 | 4.71 |
| sd:  | 0.0227 | 3.89  | 31.2 | 1510 | 3900 |

|       | CNST  | HILL   | GNLS   |
|-------|-------|--------|--------|
| AIC:  | 52.26 | -29.16 | -25.16 |
| PROB: | 0     | 0.88   | 0.12   |
| RMSE: | 0.44  | 0.15   | 0.15   |

MAX\_MEAN: 0.595 MAX\_MED: 0.601 BMAD: 0.164

COFF: 0.491 HIT-CALL: 0 FITC: 20 ACTP: 1

FLAGS: 12

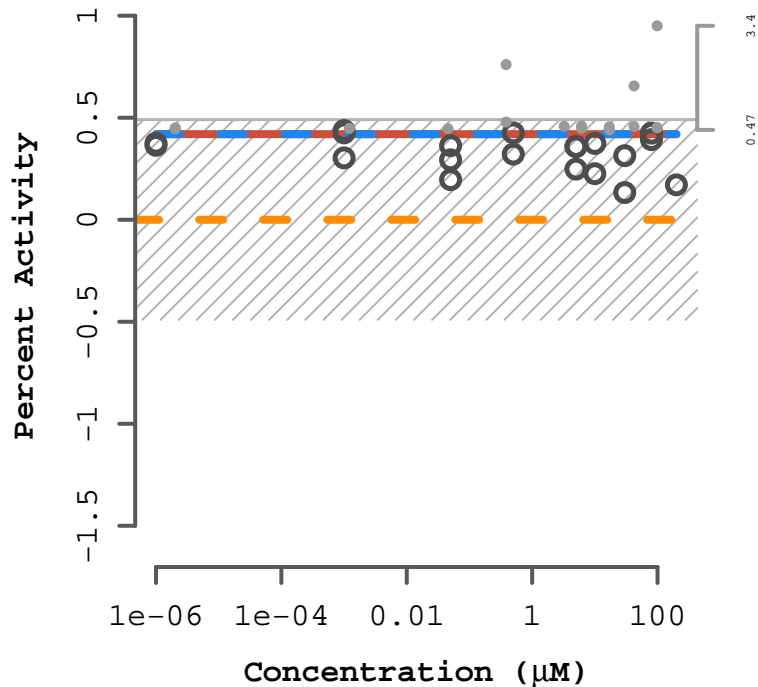

ASSAY: AEID3095 (CCTE\_Deisenroth\_DEVTOX\_RUES2-GLR\_Sox:

NAME: Dimethyl phthalate

CHID: 22455 CASRN: 131-11-3

SPID(S): ES211\_30\_30

M4ID: 42675997 BRK

HILL MODEL (in red):

|      | tp     | ga  | gw   |
|------|--------|-----|------|
| val: | 0.419  | -7  | 6.71 |
| sd:  | 0.0285 | 236 | 1500 |

GAIN-LOSS MODEL (in blue):

|      | tp     | ga  | gw   | la   | lw   |
|------|--------|-----|------|------|------|
| val: | 0.419  | -7  | 6.79 | 4.1  | 4.22 |
| sd:  | 0.0285 | 251 | 1600 | 1430 | 3320 |

|       | CNST  | HILL  | GNLS  |
|-------|-------|-------|-------|
| AIC:  | 78.45 | 23.41 | 27.41 |
| PROB: | 0     | 0.88  | 0.12  |
| RMSE: | 0.84  | 0.63  | 0.63  |

MAX\_MEAN: 1.15 MAX\_MED: 0.556 BMAD: 0.164

COFF: 0.491 HIT-CALL: 0 FITC: 20 ACTP: 1

FLAGS: 8; 10; 12



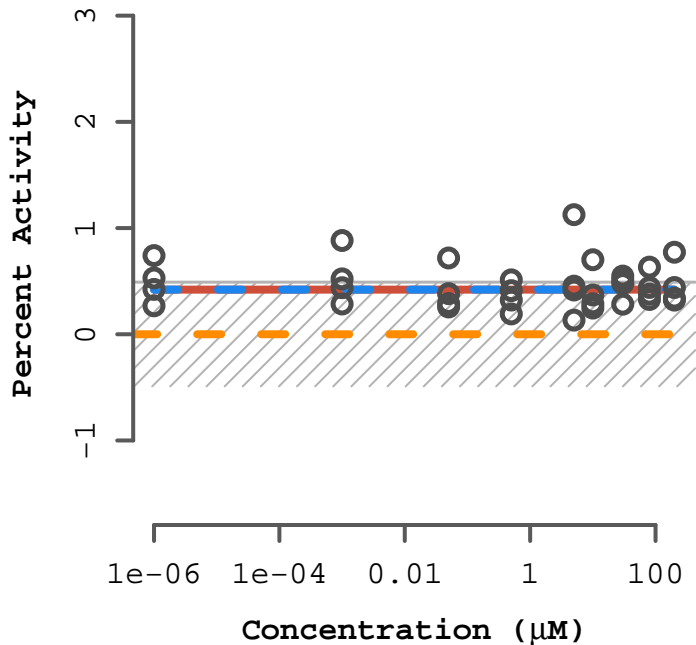

ASSAY: AEID3095 (CCTE\_Deisenroth\_DEVTOX\_RUES2-GLR\_Sox:

NAME: Salicylic acid

CHID: 26368 CASRN: 69-72-7

SPID(S): ES211\_55\_55

M4ID: 42676010

HILL MODEL (in red):

|      | tp     | ga  | gw   |
|------|--------|-----|------|
| val: | 0.42   | -7  | 7.07 |
| sd:  | 0.0297 | 223 | 1440 |

GAIN-LOSS MODEL (in blue):

|      | tp     | ga  | gw   | la   | lw    |
|------|--------|-----|------|------|-------|
| val: | 0.42   | -7  | 6.87 | 3.03 | 10.6  |
| sd:  | 0.0297 | 197 | 1270 | 2600 | 37600 |

|       | CNST  | HILL  | GNLS  |
|-------|-------|-------|-------|
| AIC:  | 59.59 | -7.36 | -3.36 |
| PROB: | 0     | 0.88  | 0.12  |
| RMSE: | 0.5   | 0.21  | 0.21  |

MAX\_MEAN: 0.533 MAX\_MED: 0.494 BMAD: 0.164

COFF: 0.491 HIT-CALL: 0 FITC: 20 ACTP: 1

FLAGS: 12

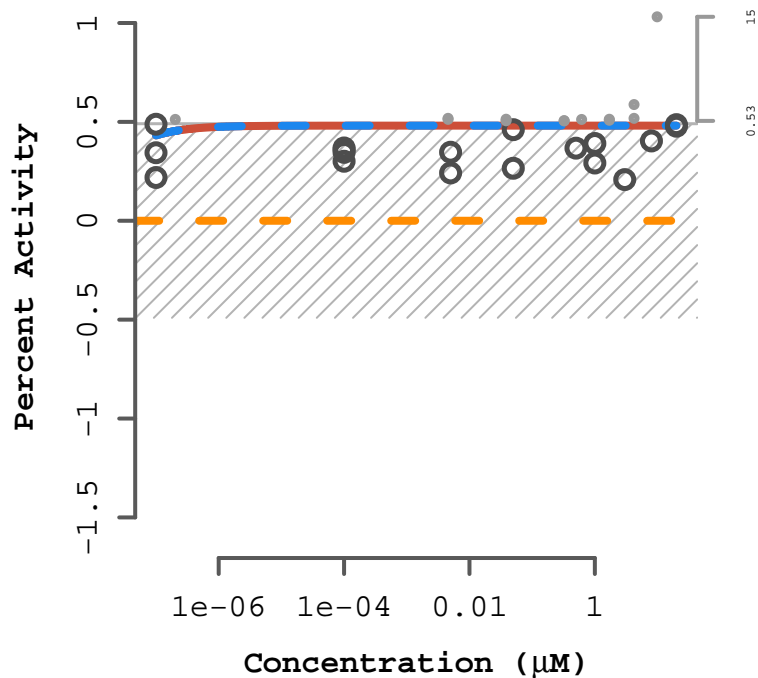

ASSAY: AEID3095 (CCTE\_Deisenroth\_DEVTOX\_RUES2-GLR\_Sox)

NAME: Cyclopamine

CHID: 43709 CASRN: 4449-51-8

SPID(S): ES211\_23\_23

M4ID: 42675992 BRK

HILL MODEL (in red):

|      |       |     |       |
|------|-------|-----|-------|
|      | tp    | ga  | gw    |
| val: | 0.481 | -8  | 0.939 |
| sd:  | NaN   | NaN | NaN   |

GAIN-LOSS MODEL (in blue):

|      |       |    |       |      |    |
|------|-------|----|-------|------|----|
|      | tp    | ga | gw    | la   | lw |
| val: | 0.481 | -8 | 0.942 | 3.29 | 18 |
| sd:  | NA    | NA | NA    | NA   | NA |

|       |       |       |       |
|-------|-------|-------|-------|
|       | CNST  | HILL  | GNLS  |
| AIC:  | 90.06 | 50.95 | 54.95 |
| PROB: | 0     | 0.88  | 0.12  |
| RMSE: | 2.78  | 2.64  | 2.64  |

MAX\_MEAN: 5.31 MAX\_MED: 0.885 BMAD: 0.164

COFF: 0.491 HIT-CALL: 0 FITC: 20 ACTP: 1

FLAGS: 8; 10; 12

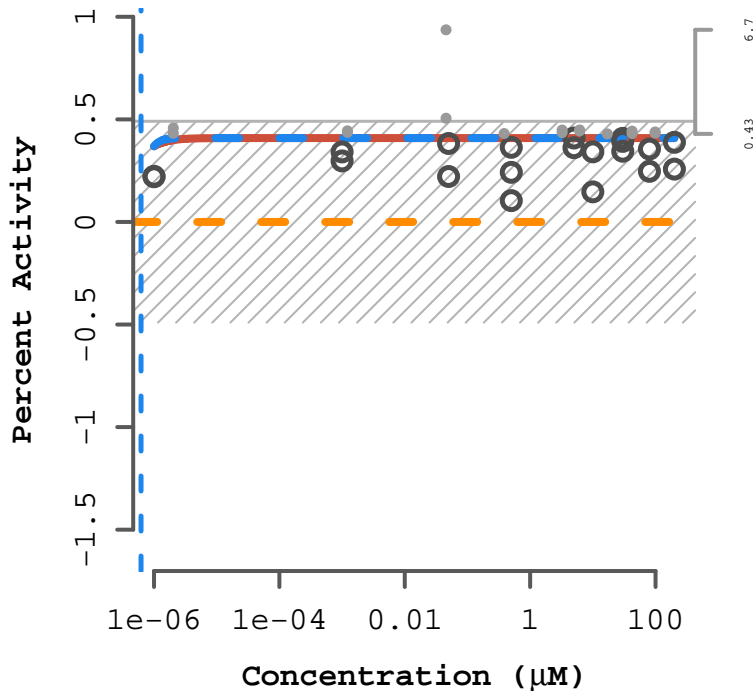

ASSAY: AEID3095 (CCTE\_Deisenroth\_DEVTOX\_RUES2-GLR\_Sox)

NAME: Penicillin G potassium  
 CHID: 45106 CASRN: 113-98-4  
 SPID(S): ES211\_49\_49  
 M4ID: 42675978 BRK

HILL MODEL (in red):

|      | tp     | ga    | gw   |
|------|--------|-------|------|
| val: | 0.409  | -6.45 | 2.12 |
| sd:  | 0.0318 | 14    | 65.5 |

GAIN-LOSS MODEL (in blue):

|      | tp    | ga    | gw   | la   | lw   |
|------|-------|-------|------|------|------|
| val: | 0.409 | -6.21 | 4.65 | 3.86 | 4.65 |
| sd:  | NaN   | NaN   | NaN  | NaN  | NaN  |

|       | CNST  | HILL  | GNLS  |
|-------|-------|-------|-------|
| AIC:  | 75.61 | 19.94 | 23.94 |
| PROB: | 0     | 0.88  | 0.12  |
| RMSE: | 1.22  | 1.07  | 1.07  |

MAX\_MEAN: 2.17 MAX\_MED: 0.88 BMAD: 0.164

COFF: 0.491 HIT-CALL: 0 FITC: 20 ACTP: 1

FLAGS: 10; 12

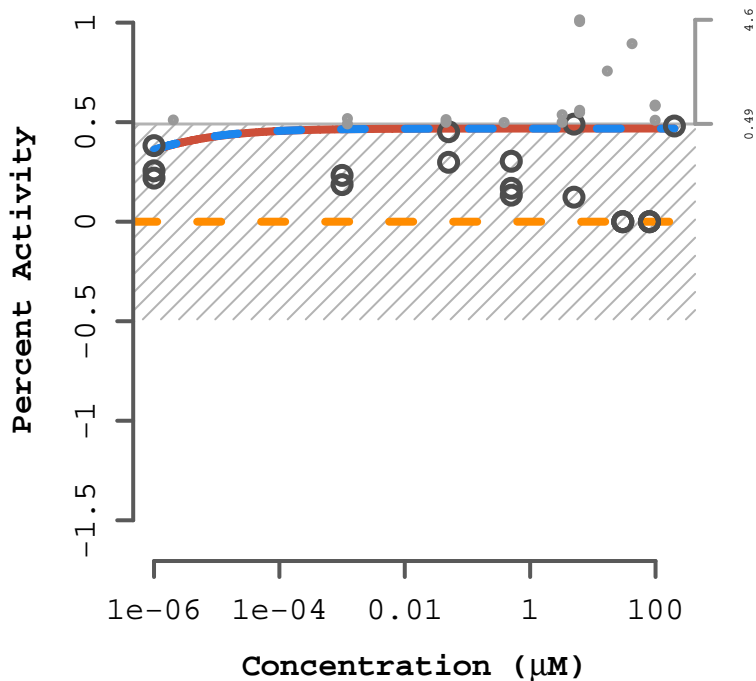

ASSAY: AEID3095 (CCTE\_Deisenroth\_DEVTOX\_RUES2-GLR\_Sox)

NAME: Tegaserod maleate

CHID: 904761 CASRN: 189188-57-6

SPID(S): ES211\_61\_61

M4ID: 42676033 BRK

HILL MODEL (in red):

|      |       |     |       |
|------|-------|-----|-------|
|      | tp    | ga  | gw    |
| val: | 0.468 | -7  | 0.521 |
| sd:  | NaN   | NaN | NaN   |

GAIN-LOSS MODEL (in blue):

|      |       |     |       |      |      |
|------|-------|-----|-------|------|------|
|      | tp    | ga  | gw    | la   | lw   |
| val: | 0.468 | -7  | 0.532 | 3.16 | 17.9 |
| sd:  | NaN   | NaN | NaN   | NaN  | NaN  |

|       |        |       |       |
|-------|--------|-------|-------|
|       | CNST   | HILL  | GNLS  |
| AIC:  | 110.47 | 95.18 | 99.18 |
| PROB: | 0      | 0.88  | 0.12  |
| RMSE: | 1.41   | 1.21  | 1.21  |

MAX\_MEAN: 2.78 MAX\_MED: 2.79 BMAD: 0.164

COFF: 0.491 HIT-CALL: 0 FITC: 20 ACTP: 1

FLAGS: 8; 10; 12

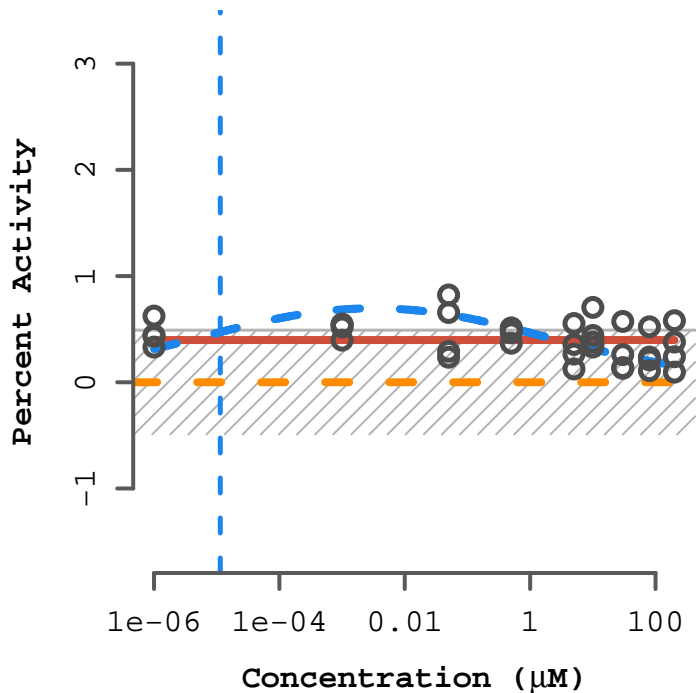

ASSAY: AEID3095 (CCTE\_Deisenroth\_DEVTOX\_RUES2-GLR\_Sox:

NAME: 5,5-Diphenylhydantoin  
CHID: 20541 CASRN: 57-41-0  
SPID(S): ES211\_3\_3  
M4ID: 42676005

HILL MODEL (in red):

|      | tp     | ga  | gw   |
|------|--------|-----|------|
| val: | 0.397  | -7  | 7.08 |
| sd:  | 0.0316 | 207 | 1340 |

GAIN-LOSS MODEL (in blue):

|      | tp    | ga    | gw  | la      | lw  |
|------|-------|-------|-----|---------|-----|
| val: | 0.977 | -4.94 | 0.3 | -0.0432 | 0.3 |
| sd:  | NaN   | NaN   | NaN | NaN     | NaN |

|       | CNST  | HILL   | GNLS  |
|-------|-------|--------|-------|
| AIC:  | 50.79 | -10.16 | -1.85 |
| PROB: | 0     | 0.98   | 0.02  |
| RMSE: | 0.44  | 0.18   | 0.2   |

MAX\_MEAN: 0.502 MAX\_MED: 0.532 BMAD: 0.164

COFF: 0.491 HIT-CALL: 0 FITC: 21 ACTP: 1

FLAGS: 12

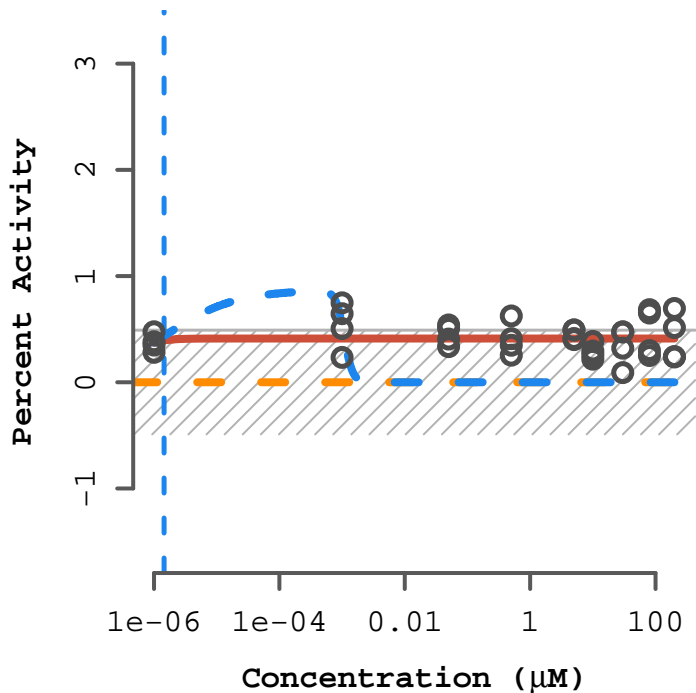

ASSAY: AEID3095 (CCTE\_Deisenroth\_DEVTOX\_RUES2-GLR\_Sox:

NAME: Carbamazepine

CHID: 22731 CASRN: 298-46-4

SPID(S): ES211\_21\_21

M4ID: 42676015

HILL MODEL (in red):

|      |       |       |      |
|------|-------|-------|------|
|      | tp    | ga    | gw   |
| val: | 0.412 | -6.41 | 2.35 |
| sd:  | NaN   | NaN   | NaN  |

GAIN-LOSS MODEL (in blue):

|      |       |       |       |       |      |
|------|-------|-------|-------|-------|------|
|      | tp    | ga    | gw    | la    | lw   |
| val: | 0.869 | -5.84 | 0.777 | -2.97 | 6.58 |
| sd:  | NaN   | NaN   | NaN   | NaN   | NaN  |

|       |       |        |       |
|-------|-------|--------|-------|
|       | CNST  | HILL   | GNLS  |
| AIC:  | 52.41 | -21.11 | 51.36 |
| PROB: | 0     | 1      | 0     |
| RMSE: | 0.44  | 0.15   | 0.39  |

MAX\_MEAN: 0.534 MAX\_MED: 0.576 BMAD: 0.164

COFF: 0.491 HIT-CALL: 0 FITC: 21 ACTP: 1

FLAGS: 12

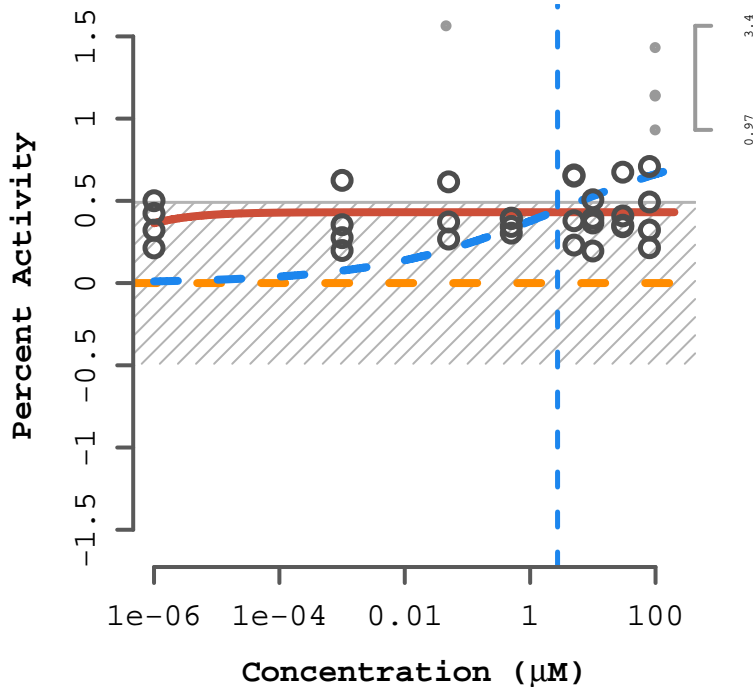

ASSAY: AEID3095 (CCTE\_Deisenroth\_DEVTOX\_RUES2-GLR\_Sox:

NAME: MEHP

CHID: 25680 CASRN: 4376-20-9

SPID(S): ES211\_44\_44

M4ID: 42676011 BRK

HILL MODEL (in red):

|      |       |     |       |
|------|-------|-----|-------|
|      | tp    | ga  | gw    |
| val: | 0.431 | -7  | 0.735 |
| sd:  | NaN   | NaN | NaN   |

GAIN-LOSS MODEL (in blue):

|      |       |       |     |     |      |
|------|-------|-------|-----|-----|------|
|      | tp    | ga    | gw  | la  | lw   |
| val: | 0.887 | 0.437 | 0.3 | 4.3 | 5.17 |
| sd:  | NaN   | NaN   | NaN | NaN | NaN  |

|       |       |      |       |
|-------|-------|------|-------|
|       | CNST  | HILL | GNLS  |
| AIC:  | 88.56 | 49.9 | 64.44 |
| PROB: | 0     | 1    | 0     |
| RMSE: | 0.95  | 0.73 | 0.73  |

MAX\_MEAN: 1.85 MAX\_MED: 1.77 BMAD: 0.164

COFF: 0.491 HIT-CALL: 0 FITC: 21 ACTP: 1

FLAGS: 8; 10; 12

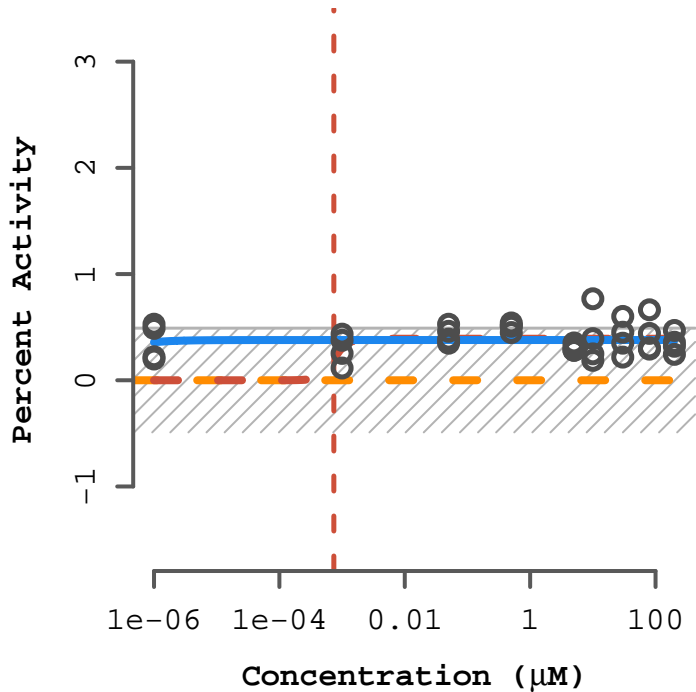

ASSAY: AEID3095 (CCTE\_Deisenroth\_DEVTOX\_RUES2-GLR\_Sox:

NAME: Aspirin

CHID: 20108 CASRN: 50-78-2

SPID(S): ES211\_15\_15

M4ID: 42675995

HILL MODEL (in red):

|      | tp    | ga    | gw   |
|------|-------|-------|------|
| val: | 0.391 | -3.13 | 4.08 |
| sd:  | NaN   | NaN   | NaN  |

GAIN-LOSS MODEL (in blue):

|      | tp    | ga  | gw   | la   | lw   |
|------|-------|-----|------|------|------|
| val: | 0.379 | -7  | 1.25 | 4.14 | 7.43 |
| sd:  | NaN   | NaN | NaN  | NaN  | NaN  |

|       | CNST  | HILL   | GNLS   |
|-------|-------|--------|--------|
| AIC:  | 46.95 | -14.87 | -25.11 |
| PROB: | 0     | 0.01   | 0.99   |
| RMSE: | 0.41  | 0.18   | 0.14   |

MAX\_MEAN: 0.503 MAX\_MED: 0.512 BMAD: 0.164

COFF: 0.491 HIT-CALL: 0 FITC: 24 ACTP: 1

FLAGS:



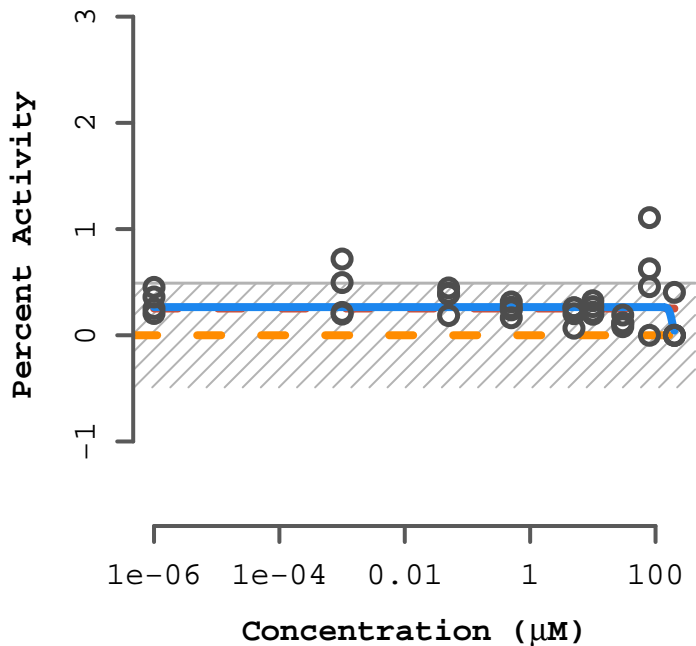

ASSAY: AEID3095 (CCTE\_Deisenroth\_DEVTOX\_RUES2-GLR\_Sox)

NAME: Rifampicin

CHID: 21244 CASRN: 13292-46-1

SPID(S): ES211\_52\_52

M4ID: 42676039

HILL MODEL (in red):

|      | tp     | ga  | gw   |
|------|--------|-----|------|
| val: | 0.252  | -7  | 7.1  |
| sd:  | 0.0293 | 242 | 1570 |

GAIN-LOSS MODEL (in blue):

|      | tp     | ga  | gw   | la     | lw   |
|------|--------|-----|------|--------|------|
| val: | 0.265  | -7  | 6.29 | 2.26   | 17.8 |
| sd:  | 0.0281 | 143 | 877  | 0.0925 | 43.4 |

|       | CNST  | HILL  | GNLS  |
|-------|-------|-------|-------|
| AIC:  | 30.51 | -6.63 | -7.76 |
| PROB: | 0     | 0.36  | 0.64  |
| RMSE: | 0.36  | 0.22  | 0.21  |

MAX\_MEAN: 0.548 MAX\_MED: 0.542 BMAD: 0.164

COFF: 0.491 HIT-CALL: 0 FITC: 24 ACTP: 1

FLAGS:

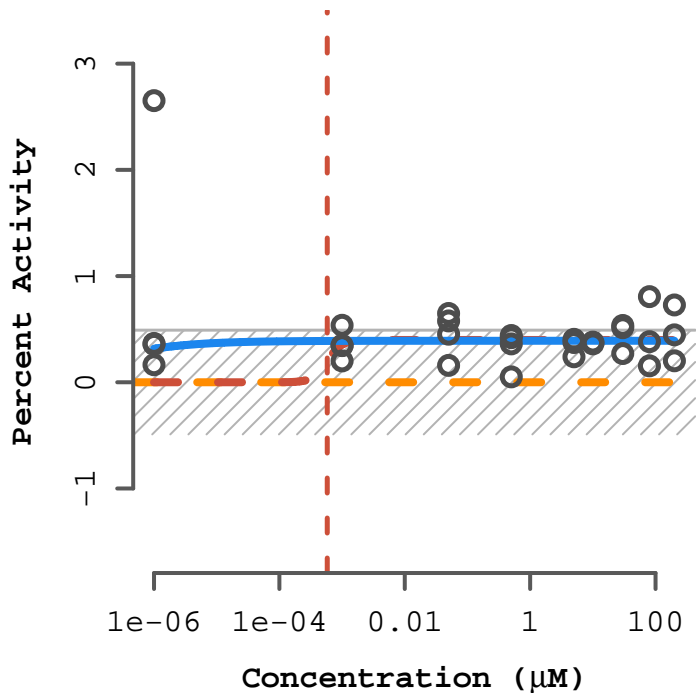

ASSAY: AEID3095 (CCTE\_Deisenroth\_DEVTOX\_RUES2-GLR\_Sox:

NAME: Folic acid

CHID: 22519 CASRN: 59-30-3

SPID(S): ES211\_33\_33

M4ID: 42676016

HILL MODEL (in red):

|      | tp    | ga    | gw   |
|------|-------|-------|------|
| val: | 0.398 | -3.24 | 3.83 |
| sd:  | NaN   | NaN   | NaN  |

GAIN-LOSS MODEL (in blue):

|      | tp    | ga  | gw    | la   | lw   |
|------|-------|-----|-------|------|------|
| val: | 0.391 | -7  | 0.625 | 4.12 | 4.27 |
| sd:  | NaN   | NaN | NaN   | NaN  | NaN  |

|       | CNST  | HILL  | GNLS |
|-------|-------|-------|------|
| AIC:  | 52.89 | 14.09 | 8.86 |
| PROB: | 0     | 0.07  | 0.93 |
| RMSE: | 0.63  | 0.51  | 0.45 |

MAX\_MEAN: 0.885 MAX\_MED: 0.515 BMAD: 0.164

COFF: 0.491 HIT-CALL: 0 FITC: 26 ACTP: 1

FLAGS: 8; 12

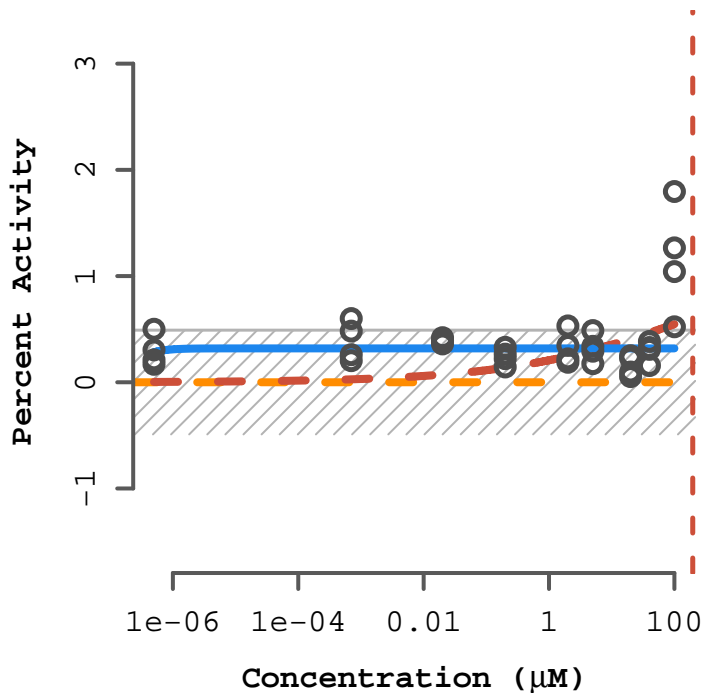

ASSAY: AEID3095 (CCTE\_Deisenroth\_DEVTOX\_RUES2-GLR\_Sox:

NAME: Ketanserin tartrate

CHID: 1003945 CASRN: 83846-83-7

SPID(S): ES211\_40\_40

M4ID: 42675996

HILL MODEL (in red):

|      | tp   | ga   | gw  |
|------|------|------|-----|
| val: | 1.22 | 2.29 | 0.3 |
| sd:  | NaN  | NaN  | NaN |

GAIN-LOSS MODEL (in blue):

|      | tp    | ga    | gw   | la   | lw |
|------|-------|-------|------|------|----|
| val: | 0.319 | -6.71 | 2.17 | 2.98 | 18 |
| sd:  | NA    | NA    | NA   | NA   | NA |

|       | CNST  | HILL | GNLS  |
|-------|-------|------|-------|
| AIC:  | 52.43 | 30.8 | 10.58 |
| PROB: | 0     | 0    | 1     |
| RMSE: | 0.52  | 0.35 | 0.34  |

MAX\_MEAN: 1.16 MAX\_MED: 1.15 BMAD: 0.164

COFF: 0.491 HIT-CALL: 0 FITC: 27 ACTP: 1

FLAGS: 12

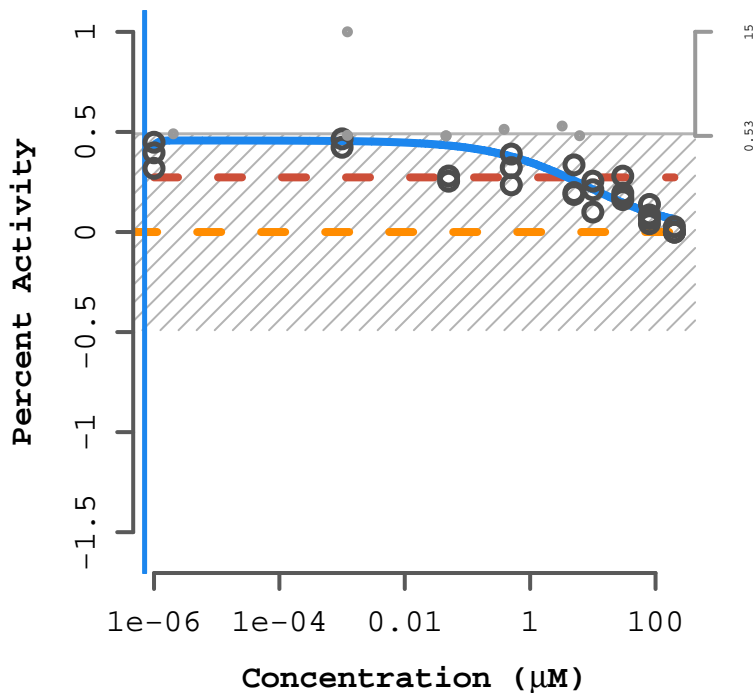

ASSAY: AEID3095 (CCTE\_Deisenroth\_DEVTOX\_RUES2-GLR\_Sox:

NAME: Methylidopa sesquihydrate

CHID: 20863 CASRN: 41372-08-1

SPID(S): ES211\_46\_46

M4ID: 42676003 BRK

HILL MODEL (in red):

|      | tp     | ga  | gw   |
|------|--------|-----|------|
| val: | 0.273  | -7  | 6.79 |
| sd:  | 0.0424 | 172 | 1110 |

GAIN-LOSS MODEL (in blue):

|      | tp    | ga    | gw   | la    | lw    |
|------|-------|-------|------|-------|-------|
| val: | 0.458 | -6.15 | 7.95 | 0.897 | 0.562 |
| sd:  | NaN   | NaN   | NaN  | NaN   | NaN   |

|       | CNST  | HILL  | GNLS  |
|-------|-------|-------|-------|
| AIC:  | 76.36 | 54.07 | 32.15 |
| PROB: | 0     | 0     | 1     |
| RMSE: | 2.49  | 2.42  | 2.39  |

MAX\_MEAN: 4.03 MAX\_MED: 0.534 BMAD: 0.164

COFF: 0.491 HIT-CALL: 0 FITC: 29 ACTP: 1

FLAGS: 10; 12

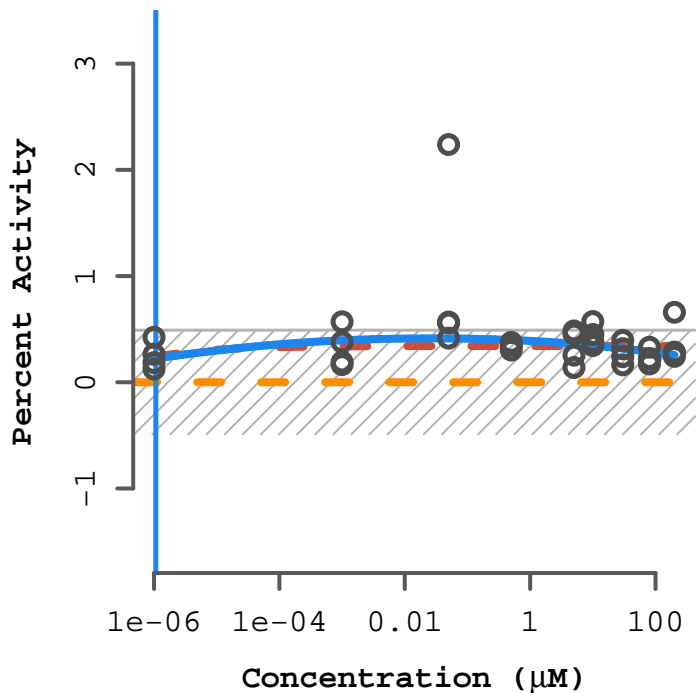

ASSAY: AEID3095 (CCTE\_Deisenroth\_DEVTOX\_RUES2-GLR\_Sox:

NAME: Saccharin

CHID: 21251 CASRN: 81-07-2

SPID(S): ES211\_54\_54

M4ID: 42675986

HILL MODEL (in red):

|      | tp    | ga    | gw   |
|------|-------|-------|------|
| val: | 0.341 | -6.64 | 0.57 |
| sd:  | 0.027 | 1.86  | 1.54 |

GAIN-LOSS MODEL (in blue):

|      | tp    | ga    | gw  | la   | lw    |
|------|-------|-------|-----|------|-------|
| val: | 0.453 | -5.97 | 0.3 | 2.68 | 0.314 |
| sd:  | NaN   | NaN   | NaN | NaN  | NaN   |

|       | CNST | HILL   | GNLS   |
|-------|------|--------|--------|
| AIC:  | 48.9 | -11.69 | -12.25 |
| PROB: | 0    | 0.43   | 0.57   |
| RMSE: | 0.52 | 0.34   | 0.33   |

MAX\_MEAN: 0.945 MAX\_MED: 0.563 BMAD: 0.164

COFF: 0.491 HIT-CALL: 0 FITC: 29 ACTP: 1

FLAGS: 12

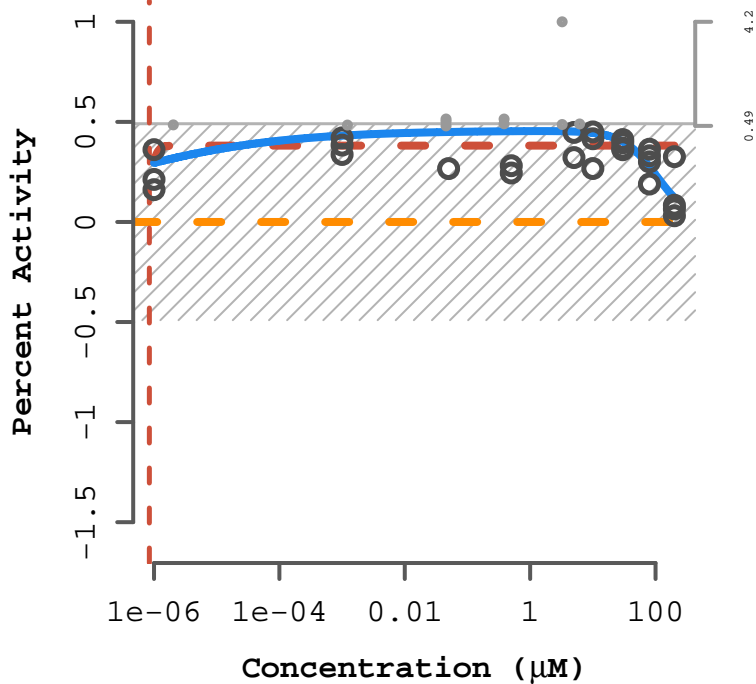

ASSAY: AEID3095 (CCTE\_Deisenroth\_DEVTOX\_RUES2-GLR\_Sox)

NAME: Sulfasalazine

CHID: 21256 CASRN: 599-79-1

SPID(S): ES211\_59\_59

M4ID: 42675981 BRK

HILL MODEL (in red):

|      | tp     | ga    | gw   |
|------|--------|-------|------|
| val: | 0.381  | -6.07 | 7.96 |
| sd:  | 0.0306 | 0.081 | 9.53 |

GAIN-LOSS MODEL (in blue):

|      | tp    | ga    | gw    | la    | lw   |
|------|-------|-------|-------|-------|------|
| val: | 0.457 | -6.81 | 0.32  | 2.02  | 1.59 |
| sd:  | 0.063 | 1.41  | 0.409 | 0.147 | 1.05 |

|       | CNST  | HILL | GNLS  |
|-------|-------|------|-------|
| AIC:  | 62.08 | 6.66 | -4.95 |
| PROB: | 0     | 0    | 1     |
| RMSE: | 0.81  | 0.66 | 0.64  |

MAX\_MEAN: 1.38 MAX\_MED: 0.57 BMAD: 0.164

COFF: 0.491 HIT-CALL: 0 FITC: 29 ACTP: 1

FLAGS: 8; 10; 12

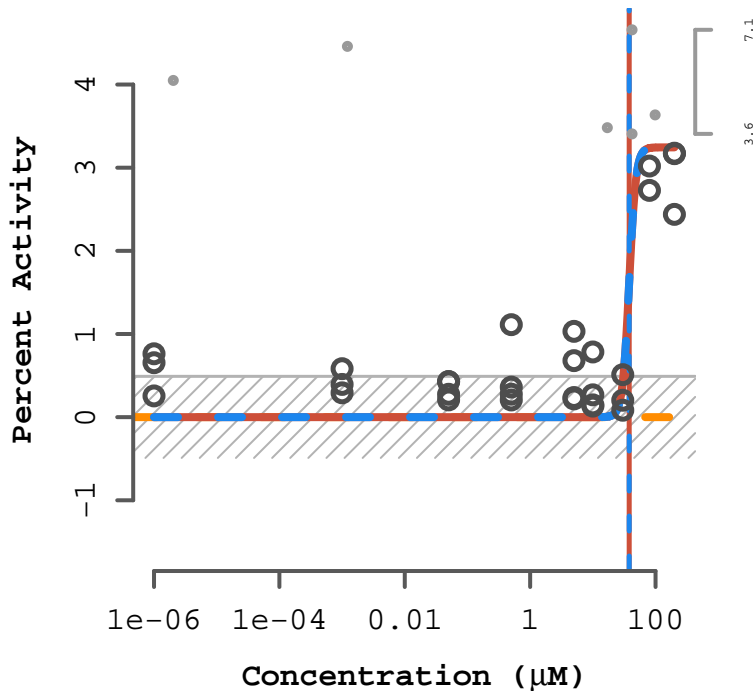

ASSAY: AEID3095 (CCTE\_Deisenroth\_DEVTOX\_RUES2-GLR\_Sox)

NAME: Bisphenol A

CHID: 20182 CASRN: 80-05-7

SPID(S): ES211\_16\_16

M4ID: 42676031 BRK

HILL MODEL (in red):

|      | tp    | ga    | gw   |
|------|-------|-------|------|
| val: | 3.24  | 1.58  | 8    |
| sd:  | 0.287 | 0.306 | 23.4 |

GAIN-LOSS MODEL (in blue):

|      | tp   | ga   | gw  | la  | lw   |
|------|------|------|-----|-----|------|
| val: | 3.24 | 1.58 | 8   | 4.3 | 4.19 |
| sd:  | NaN  | NaN  | NaN | NaN | NaN  |

|       | CNST   | HILL   | GNLS   |
|-------|--------|--------|--------|
| AIC:  | 161.85 | 120.88 | 124.88 |
| PROB: | 0      | 0.88   | 0.12   |
| RMSE: | 2.45   | 1.72   | 1.72   |

MAX\_MEAN: 4.11 MAX\_MED: 3.32 BMAD: 0.164

COFF: 0.491 HIT-CALL: 1 FITC: 41 ACTP: 1

FLAGS: 10

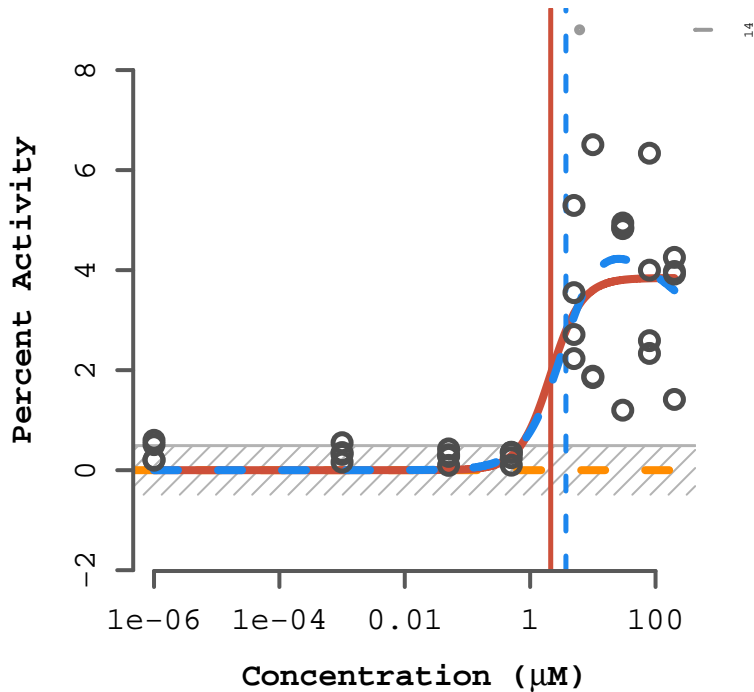

ASSAY: AEID3095 (CCTE\_Deisenroth\_DEVTOX\_RUES2-GLR\_Sox)

NAME: Diethylstilbestrol

CHID: 20465 CASRN: 56-53-1

SPID(S): ES211\_29\_29

M4ID: 42675973 BRK

HILL MODEL (in red):

|      | tp    | ga    | gw    |
|------|-------|-------|-------|
| val: | 3.84  | 0.328 | 1.74  |
| sd:  | 0.391 | 0.239 | 0.856 |

GAIN-LOSS MODEL (in blue):

|      | tp   | ga    | gw    | la   | lw   |
|------|------|-------|-------|------|------|
| val: | 6.4  | 0.571 | 1.39  | 2.67 | 0.3  |
| sd:  | 33.8 | 0.872 | 0.762 | 14.6 | 2.37 |

|       | CNST  | HILL   | GNLS   |
|-------|-------|--------|--------|
| AIC:  | 191.9 | 135.95 | 139.41 |
| PROB: | 0     | 0.85   | 0.15   |
| RMSE: | 3.71  | 2.1    | 2.06   |

MAX\_MEAN: 6.09 MAX\_MED: 4.84 BMAD: 0.164

COFF: 0.491 HIT-CALL: 1 FITC: 41 ACTP: 1

FLAGS: 10



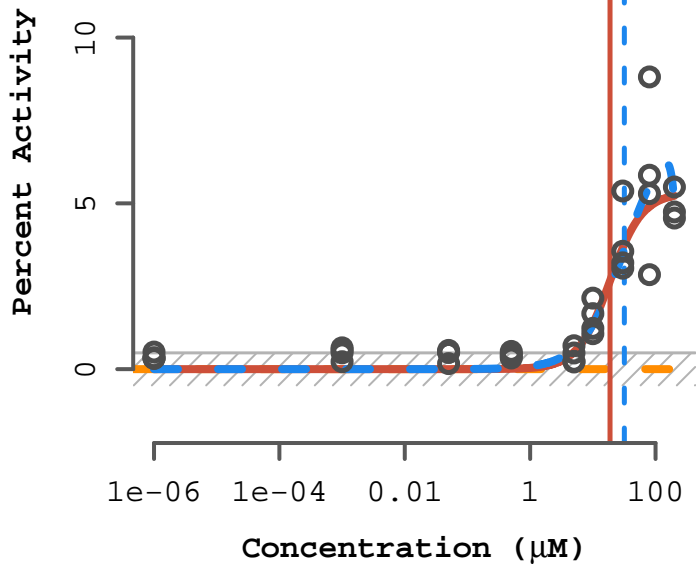

ASSAY: AEID3095 (CCTE\_Deisenroth\_DEVTOX\_RUES2-GLR\_Sox:

NAME: 5-Fluorouracil  
 CHID: 20634 CASRN: 51-21-8  
 SPID(S): ES211\_5\_5  
 M4ID: 42676009

HILL MODEL (in red):

|      | tp    | ga     | gw    |
|------|-------|--------|-------|
| val: | 5.33  | 1.27   | 1.68  |
| sd:  | 0.417 | 0.0806 | 0.337 |

GAIN-LOSS MODEL (in blue):

|      | tp   | ga    | gw    | la     | lw   |
|------|------|-------|-------|--------|------|
| val: | 7.23 | 1.5   | 1.28  | 2.35   | 9.49 |
| sd:  | 2.13 | 0.246 | 0.374 | 0.0223 | 6.4  |

|       | CNST   | HILL   | GNLS   |
|-------|--------|--------|--------|
| AIC:  | 186.07 | 104.22 | 105.55 |
| PROB: | 0      | 0.66   | 0.34   |
| RMSE: | 3.48   | 1.41   | 1.42   |

MAX\_MEAN: 6.64 MAX\_MED: 5.57 BMAD: 0.164

COFF: 0.491 HIT-CALL: 1 FITC: 41 ACTP: 1

FLAGS: 10

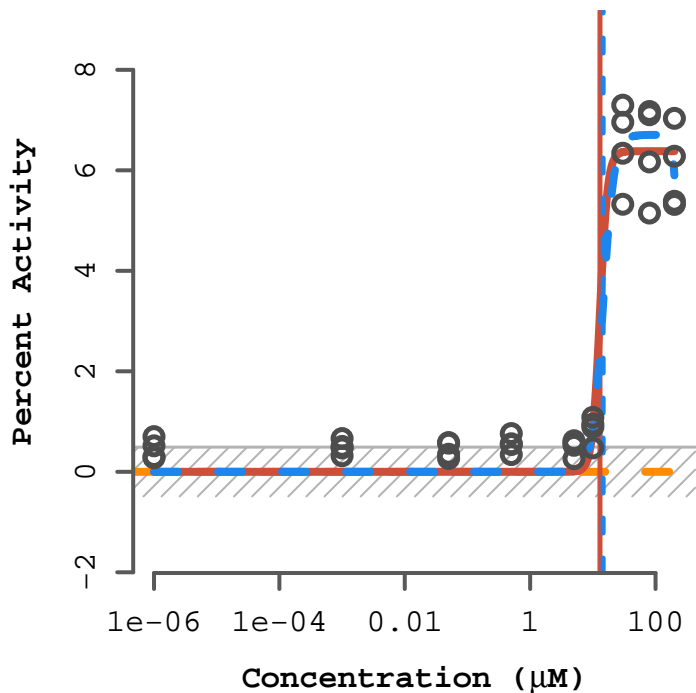

ASSAY: AEID3095 (CCTE\_Deisenroth\_DEVTOX\_RUES2-GLR\_Sox:

NAME: 1-(p-Chlorobenzoyl)-5-methoxy-2-methyl-Indole-

CHID: 20740 CASRN: 53-86-1

SPID(S): ES211\_38\_38

M4ID: 42675984

HILL MODEL (in red):

|      | tp    | ga    | gw   |
|------|-------|-------|------|
| val: | 6.38  | 1.11  | 7.06 |
| sd:  | 0.244 | 0.138 | 8.65 |

GAIN-LOSS MODEL (in blue):

|      | tp   | ga   | gw   | la   | lw   |
|------|------|------|------|------|------|
| val: | 6.71 | 1.16 | 4.96 | 2.38 | 11.1 |
| sd:  | NaN  | NaN  | NaN  | NaN  | NaN  |

|       | CNST   | HILL  | GNLS  |
|-------|--------|-------|-------|
| AIC:  | 196.95 | 78.33 | 79.93 |
| PROB: | 0      | 0.69  | 0.31  |
| RMSE: | 3.69   | 0.6   | 0.59  |

MAX\_MEAN: 6.48 MAX\_MED: 6.65 BMAD: 0.164

COFF: 0.491 HIT-CALL: 1 FITC: 41 ACTP: 1

FLAGS: 10

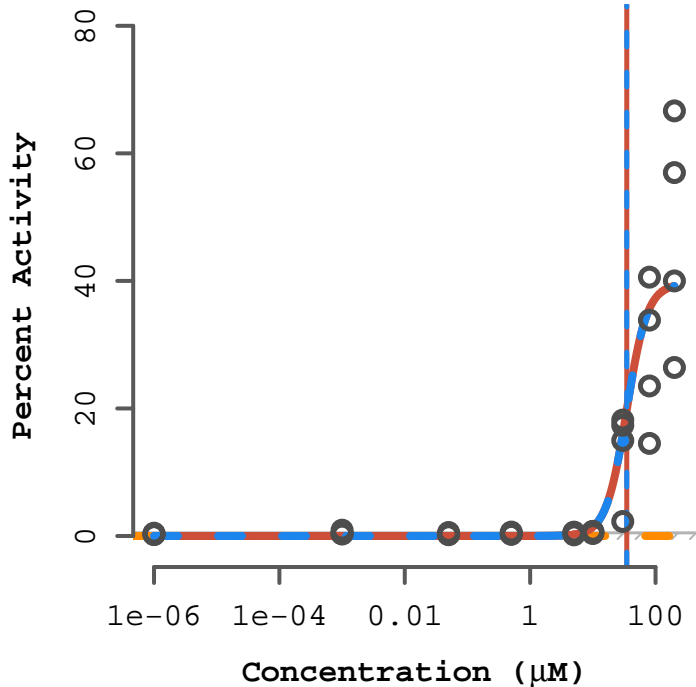

ASSAY: AEID3095 (CCTE\_Deisenroth\_DEVTOX\_RUES2-GLR\_Sox:

NAME: 13-cis Retinoic acid

CHID: 23177 CASRN: 4759-48-2

SPID(S): ES211\_2\_2

M4ID: 42676022

HILL MODEL (in red):

|      | tp   | ga     | gw    |
|------|------|--------|-------|
| val: | 39.6 | 1.54   | 2.65  |
| sd:  | 2.26 | 0.0406 | 0.586 |

GAIN-LOSS MODEL (in blue):

|      | tp   | ga   | gw   | la   | lw   |
|------|------|------|------|------|------|
| val: | 39.6 | 1.54 | 2.65 | 3.38 | 13.9 |
| sd:  | NA   | NA   | NA   | NA   | NA   |

|       | CNST  | HILL   | GNLS   |
|-------|-------|--------|--------|
| AIC:  | 324.4 | 226.05 | 230.05 |
| PROB: | 0     | 0.88   | 0.12   |
| RMSE: | 20.01 | 7.56   | 7.56   |

MAX\_MEAN: 47.5 MAX\_MED: 48.5 BMAD: 0.164

COFF: 0.491 HIT-CALL: 1 FITC: 41 ACTP: 1

FLAGS: 10

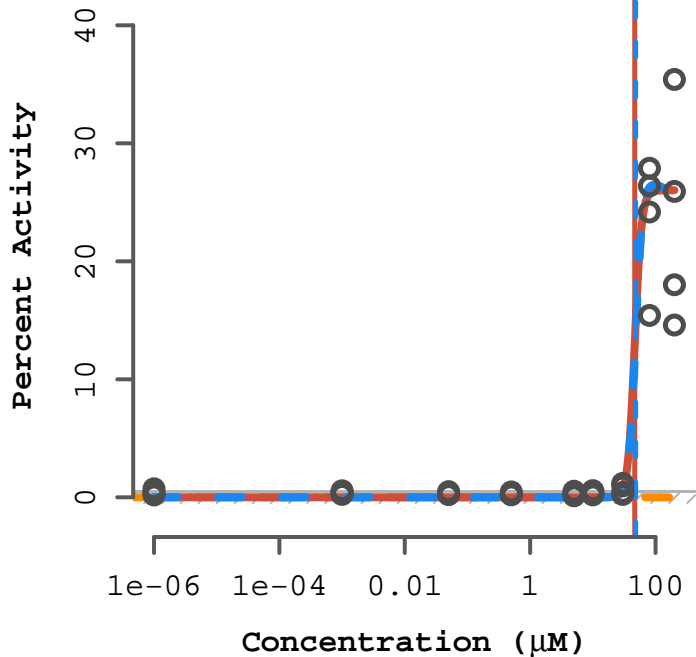

ASSAY: AEID3095 (CCTE\_Deisenroth\_DEVTOX\_RUES2-GLR\_Sox:

NAME: Retinol

CHID: 23556 CASRN: 68-26-8

SPID(S): ES211\_51\_51

M4ID: 42676028

HILL MODEL (in red):

|      | tp    | ga     | gw   |
|------|-------|--------|------|
| val: | 26    | 1.67   | 8    |
| sd:  | 0.589 | 0.0477 | 1.96 |

GAIN-LOSS MODEL (in blue):

|      | tp  | ga   | gw   | la   | lw    |
|------|-----|------|------|------|-------|
| val: | 29  | 1.68 | 7.68 | 4.15 | 0.479 |
| sd:  | NaN | NaN  | NaN  | NaN  | NaN   |

|       | CNST   | HILL   | GNLS   |
|-------|--------|--------|--------|
| AIC:  | 264.23 | 151.73 | 154.93 |
| PROB: | 0      | 0.83   | 0.17   |
| RMSE: | 11.51  | 3.33   | 3.36   |

MAX\_MEAN: 23.5 MAX\_MED: 25.3 BMAD: 0.164

COFF: 0.491 HIT-CALL: 1 FITC: 41 ACTP: 1

FLAGS: 10

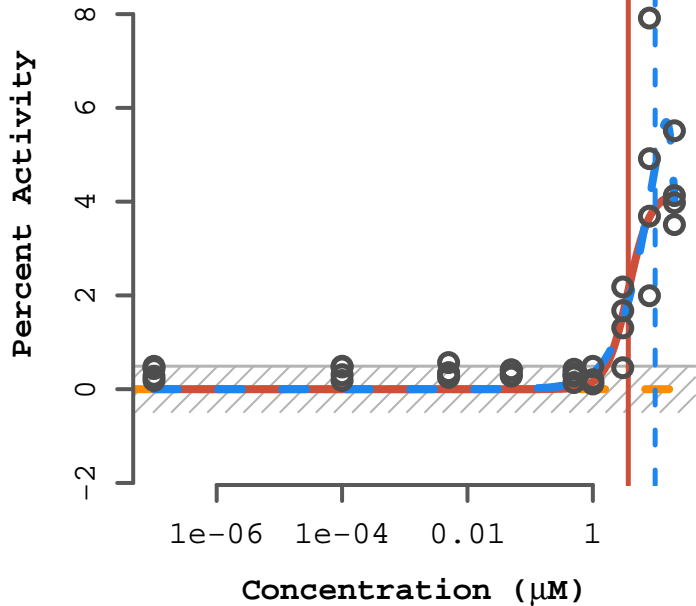

ASSAY: AEID3095 (CCTE\_Deisenroth\_DEVTOX\_RUES2-GLR\_Sox)

NAME: Ziprasidone

CHID: 23753 CASRN: 146939-27-7

SPID(S): ES211\_66\_66

M4ID: 42676019

HILL MODEL (in red):

|      | tp    | ga     | gw   |
|------|-------|--------|------|
| val: | 4.2   | 0.565  | 2.47 |
| sd:  | 0.341 | 0.0669 | 1.19 |

GAIN-LOSS MODEL (in blue):

|      | tp   | ga    | gw    | la     | lw   |
|------|------|-------|-------|--------|------|
| val: | 9.5  | 0.994 | 1.43  | 1.32   | 7.81 |
| sd:  | 15.9 | 0.886 | 0.721 | 0.0217 | 40   |

|       | CNST   | HILL | GNLS  |
|-------|--------|------|-------|
| AIC:  | 152.42 | 79.9 | 82.18 |
| PROB: | 0      | 0.76 | 0.24  |
| RMSE: | 2.31   | 0.9  | 0.86  |

MAX\_MEAN: 4.63 MAX\_MED: 4.3 BMAD: 0.164

COFF: 0.491 HIT-CALL: 1 FITC: 41 ACTP: 1

FLAGS: 10

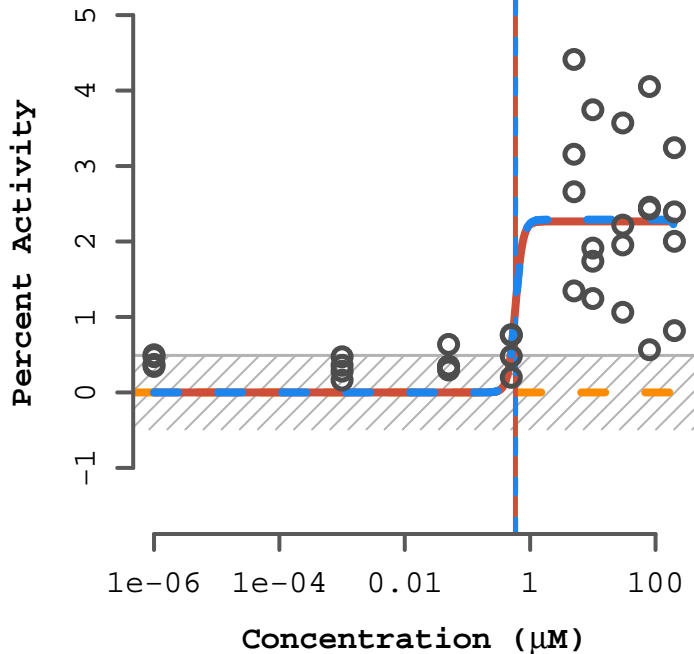

ASSAY: AEID3095 (CCTE\_Deisenroth\_DEVTOX\_RUES2-GLR\_Sox)

NAME: Cytarabine hydrochloride

CHID: 24891 CASRN: 69-74-9

SPID(S): ES211\_25\_25

M4ID: 42676000

HILL MODEL (in red):

|      | tp    | ga     | gw   |
|------|-------|--------|------|
| val: | 2.27  | -0.235 | 7.39 |
| sd:  | 0.202 | 2.31   | 258  |

GAIN-LOSS MODEL (in blue):

|      | tp   | ga     | gw   | la   | lw  |
|------|------|--------|------|------|-----|
| val: | 2.29 | -0.231 | 7.12 | 2.41 | 13  |
| sd:  | NaN  | NaN    | NaN  | NaN  | NaN |

|       | CNST   | HILL | GNLS   |
|-------|--------|------|--------|
| AIC:  | 153.45 | 96.1 | 100.06 |
| PROB: | 0      | 0.88 | 0.12   |
| RMSE: | 1.95   | 0.83 | 0.83   |

MAX\_MEAN: 2.89      MAX\_MED: 2.91      BMAD: 0.164

COFF: 0.491    HIT-CALL: 1    FITC: 41    ACTP: 1

FLAGS: 10

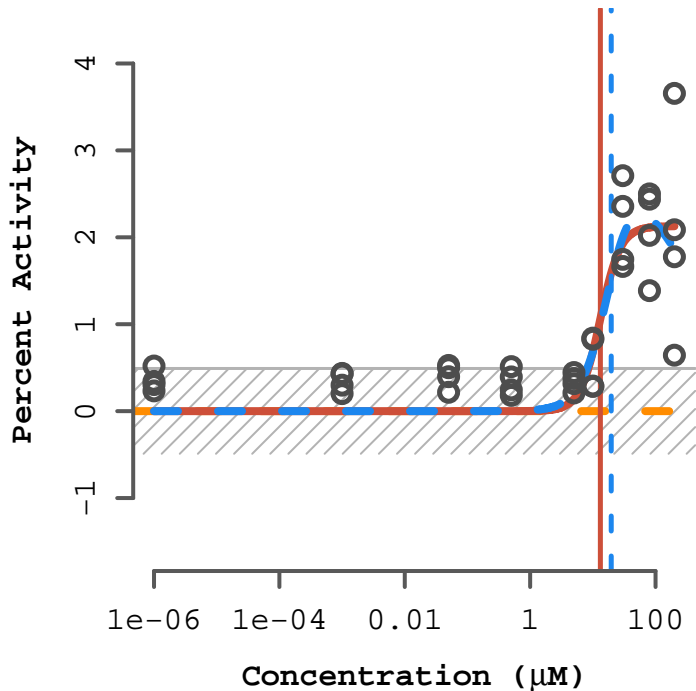

ASSAY: AEID3095 (CCTE\_Deisenroth\_DEVTOX\_RUES2-GLR\_Sox)

NAME: 5-Bromo-2'-deoxyuridine

CHID: 33105 CASRN: 59-14-3

SPID(S): ES211\_4\_4

M4ID: 42675994

HILL MODEL (in red):

|      | tp    | ga     | gw   |
|------|-------|--------|------|
| val: | 2.13  | 1.12   | 2.72 |
| sd:  | 0.179 | 0.0751 | 1.19 |

GAIN-LOSS MODEL (in blue):

|      | tp   | ga    | gw    | la   | lw    |
|------|------|-------|-------|------|-------|
| val: | 4.39 | 1.29  | 2.01  | 2.04 | 0.477 |
| sd:  | 8.04 | 0.233 | 0.736 | 3.32 | 0.842 |

|       | CNST   | HILL  | GNLS  |
|-------|--------|-------|-------|
| AIC:  | 121.96 | 58.39 | 60.62 |
| PROB: | 0      | 0.75  | 0.25  |
| RMSE: | 1.32   | 0.5   | 0.5   |

MAX\_MEAN: 2.12 MAX\_MED: 2.23 BMAD: 0.164

COFF: 0.491 HIT-CALL: 1 FITC: 41 ACTP: 1

FLAGS: 10

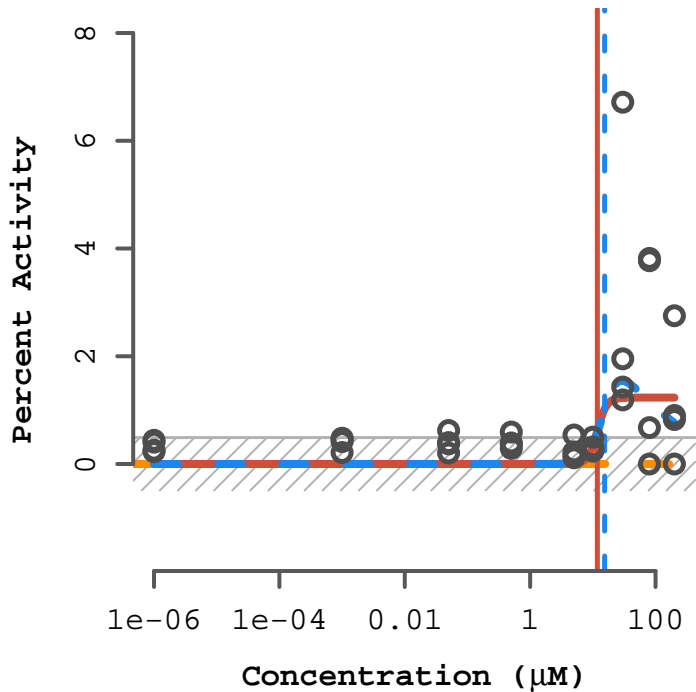

ASSAY: AEID3095 (CCTE\_Deisenroth\_DEVTOX\_RUES2-GLR\_Sox)

NAME: Amiodarone hydrochloride

CHID: 37185 CASRN: 19774-82-4

SPID(S): ES211\_14\_14

M4ID: 42675988

HILL MODEL (in red):

|      | tp    | ga    | gw   |
|------|-------|-------|------|
| val: | 1.23  | 1.07  | 5.81 |
| sd:  | 0.269 | 0.132 | 11.6 |

GAIN-LOSS MODEL (in blue):

|      | tp   | ga    | gw   | la   | lw    |
|------|------|-------|------|------|-------|
| val: | 3.44 | 1.19  | 3.72 | 1.44 | 0.636 |
| sd:  | 9.09 | 0.304 | 5.09 | 3.41 | 0.923 |

|       | CNST   | HILL  | GNLS  |
|-------|--------|-------|-------|
| AIC:  | 116.26 | 99.56 | 100.6 |
| PROB: | 0      | 0.63  | 0.37  |
| RMSE: | 1.62   | 1.21  | 1.18  |

MAX\_MEAN: 2.82 MAX\_MED: 2.22 BMAD: 0.164

COFF: 0.491 HIT-CALL: 1 FITC: 41 ACTP: 1

FLAGS: 10



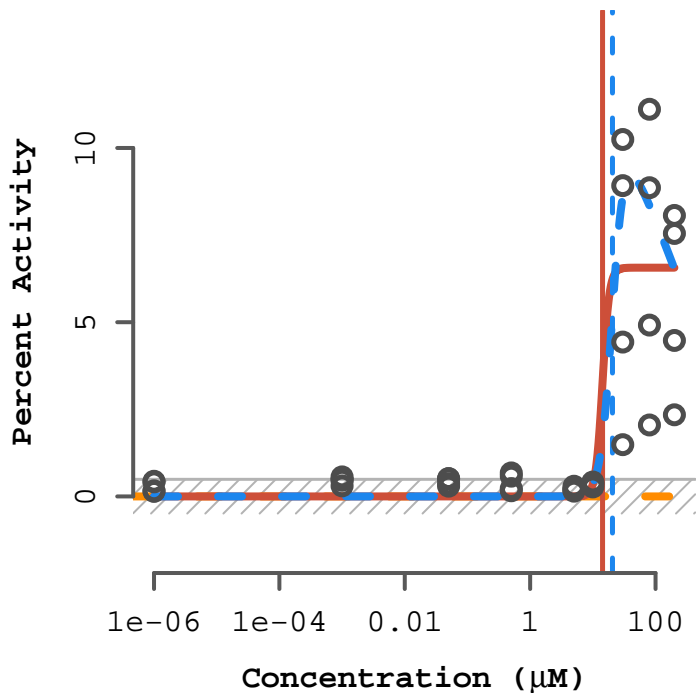

ASSAY: AEID3095 (CCTE\_Deisenroth\_DEVTOX\_RUES2-GLR\_Sox)

NAME: Imatinib mesylate

CHID: 40502 CASRN: 220127-57-1

SPID(S): ES211\_37\_37

M4ID: 42676027

HILL MODEL (in red):

|      | tp   | ga    | gw   |
|------|------|-------|------|
| val: | 6.56 | 1.15  | 8    |
| sd:  | 1.44 | 0.375 | 19.4 |

GAIN-LOSS MODEL (in blue):

|      | tp   | ga    | gw   | la   | lw    |
|------|------|-------|------|------|-------|
| val: | 13.3 | 1.31  | 4.72 | 2.27 | 0.611 |
| sd:  | 68.4 | 0.412 | 3.73 | 7.35 | 4.04  |

|       | CNST   | HILL   | GNLS   |
|-------|--------|--------|--------|
| AIC:  | 193.94 | 147.79 | 150.43 |
| PROB: | 0      | 0.79   | 0.21   |
| RMSE: | 4.04   | 1.88   | 2.1    |

MAX\_MEAN: 6.74      MAX\_MED: 6.89      BMAD: 0.164

COFF: 0.491    HIT-CALL: 1    FITC: 41    ACTP: 1

FLAGS: 10

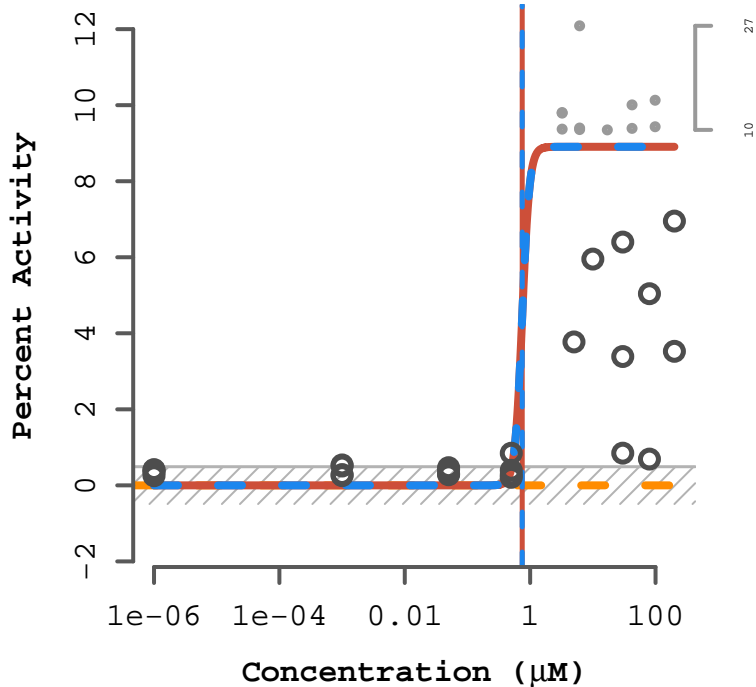

ASSAY: AEID3095 (CCTE\_Deisenroth\_DEVTOX\_RUES2-GLR\_Sox)

NAME: Sorafenib

CHID: 41128 CASRN: 284461-73-0

SPID(S): ES211\_57\_57

M4ID: 42676017 BRK

HILL MODEL (in red):

|      | tp    | ga     | gw  |
|------|-------|--------|-----|
| val: | 8.9   | -0.126 | 7.4 |
| sd:  | 0.983 | 4.71   | 200 |

GAIN-LOSS MODEL (in blue):

|      | tp    | ga     | gw   | la   | lw    |
|------|-------|--------|------|------|-------|
| val: | 8.91  | -0.127 | 7.41 | 3.19 | 7.87  |
| sd:  | 0.983 | 4.75   | 202  | 1890 | 17000 |

|       | CNST   | HILL   | GNLS   |
|-------|--------|--------|--------|
| AIC:  | 251.27 | 205.91 | 209.91 |
| PROB: | 0      | 0.88   | 0.12   |
| RMSE: | 8.16   | 4.44   | 4.44   |

MAX\_MEAN: 13.6 MAX\_MED: 11.9 BMAD: 0.164

COFF: 0.491 HIT-CALL: 1 FITC: 41 ACTP: 1

FLAGS: 10

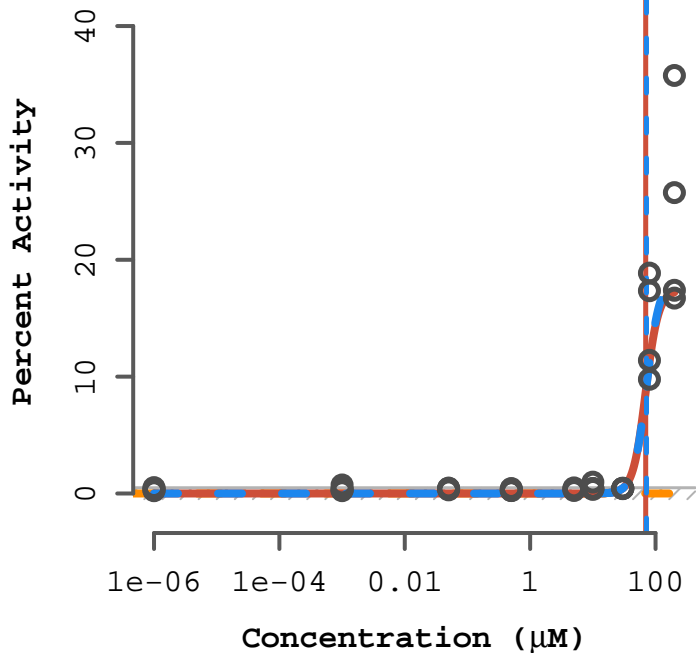

ASSAY: AEID3095 (CCTE\_Deisenroth\_DEVTOX\_RUES2-GLR\_Sox:

NAME: Esomeprazole magnesium hydrate

CHID: 746660 CASRN: 668985-31-7

SPID(S): ES211\_43\_43

M4ID: 42676036

HILL MODEL (in red):

|      |       |        |       |
|------|-------|--------|-------|
|      | tp    | ga     | gw    |
| val: | 17.4  | 1.84   | 4.31  |
| sd:  | 0.478 | 0.0177 | 0.675 |

GAIN-LOSS MODEL (in blue):

|      |      |      |      |      |      |
|------|------|------|------|------|------|
|      | tp   | ga   | gw   | la   | lw   |
| val: | 18.3 | 1.86 | 4.22 | 2.38 | 16.9 |
| sd:  | NaN  | NaN  | NaN  | NaN  | NaN  |

|       |        |        |        |
|-------|--------|--------|--------|
|       | CNST   | HILL   | GNLS   |
| AIC:  | 254.05 | 143.75 | 147.75 |
| PROB: | 0      | 0.88   | 0.12   |
| RMSE: | 9.74   | 3.8    | 3.8    |

MAX\_MEAN: 23.9 MAX\_MED: 21.6 BMAD: 0.164

COFF: 0.491 HIT-CALL: 1 FITC: 41 ACTP: 1

FLAGS: 10

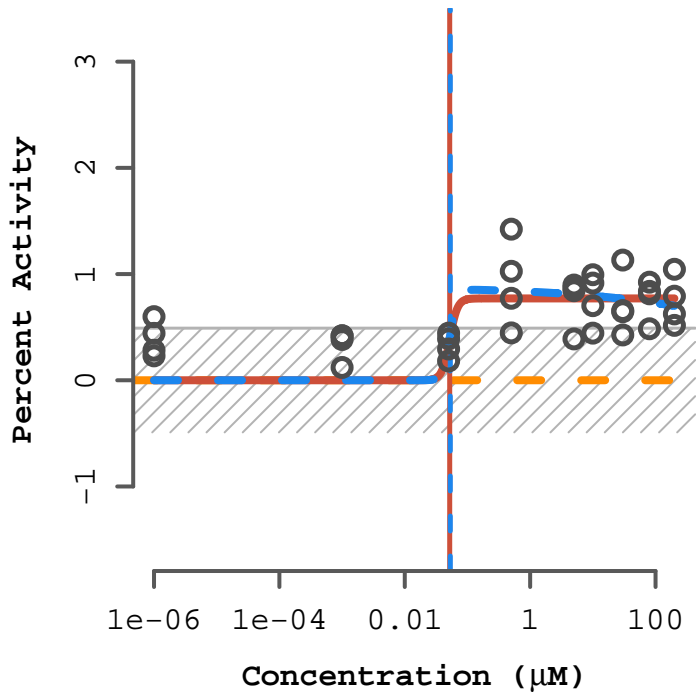

ASSAY: AEID3095 (CCTE\_Deisenroth\_DEVTOX\_RUES2-GLR\_Sox:

NAME: Methotrexate hydrate(1:x)  
 CHID: 1017640 CASRN: 133073-73-1  
 SPID(S): ES211\_45\_45  
 M4ID: 42675999

HILL MODEL (in red):

|      | tp     | ga    | gw   |
|------|--------|-------|------|
| val: | 0.771  | -1.28 | 7.06 |
| sd:  | 0.0558 | 0.636 | 250  |

GAIN-LOSS MODEL (in blue):

|      | tp    | ga    | gw   | la  | lw  |
|------|-------|-------|------|-----|-----|
| val: | 0.876 | -1.27 | 7.58 | 4.3 | 0.3 |
| sd:  | NaN   | NaN   | NaN  | NaN | NaN |

|       | CNST  | HILL  | GNLS  |
|-------|-------|-------|-------|
| AIC:  | 84.36 | 20.48 | 24.08 |
| PROB: | 0     | 0.86  | 0.14  |
| RMSE: | 0.7   | 0.28  | 0.27  |

MAX\_MEAN: 0.917      MAX\_MED: 0.899      BMAD: 0.164

COFF: 0.491    HIT-CALL: 1    FITC: 41    ACTP: 1

FLAGS:

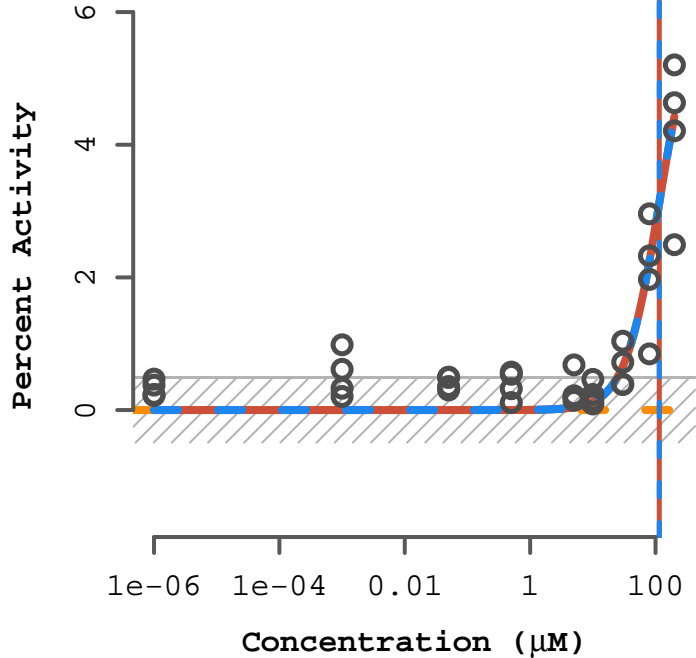

ASSAY: AEID3095 (CCTE\_Deisenroth\_DEVTOX\_RUES2-GLR\_Sox)

NAME: 4-Hydroxybenzoic acid butyl ester

CHID: 20209 CASRN: 94-26-8

SPID(S): ES211\_19\_19

M4ID: 42675998

HILL MODEL (in red):

|      | tp   | ga    | gw    |
|------|------|-------|-------|
| val: | 6.25 | 2.06  | 1.6   |
| sd:  | 1.72 | 0.181 | 0.435 |

GAIN-LOSS MODEL (in blue):

|      | tp   | ga    | gw    | la   | lw   |
|------|------|-------|-------|------|------|
| val: | 6.25 | 2.06  | 1.6   | 3.62 | 5.96 |
| sd:  | 1.72 | 0.181 | 0.435 | 944  | 4270 |

|       | CNST  | HILL  | GNLS  |
|-------|-------|-------|-------|
| AIC:  | 126.3 | 63.74 | 67.74 |
| PROB: | 0     | 0.88  | 0.12  |
| RMSE: | 1.65  | 0.56  | 0.56  |

MAX\_MEAN: 4.14 MAX\_MED: 4.42 BMAD: 0.164

COFF: 0.491 HIT-CALL: 1 FITC: 42 ACTP: 1

FLAGS: 10

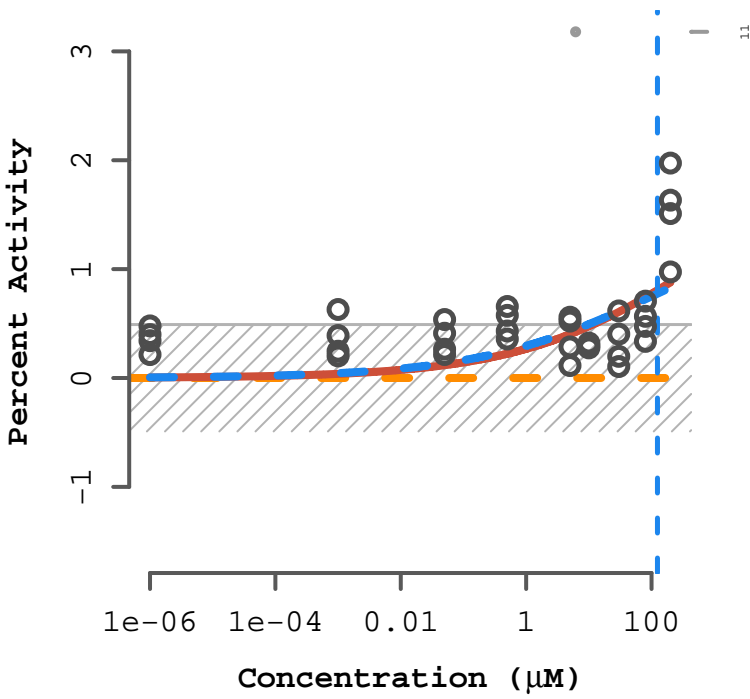

ASSAY: AEID3095 (CCTE\_Deisenroth\_DEVTOX\_RUES2-GLR\_Sox)

NAME: Diphenhydramine hydrochloride  
CHID: 20537 CASRN: 147-24-0  
SPID(S): ES211\_31\_31  
M4ID: 42676021 BRK

HILL MODEL (in red):

|      | tp   | ga   | gw     |
|------|------|------|--------|
| val: | 2.12 | 2.8  | 0.3    |
| sd:  | 2.51 | 2.99 | 0.0674 |

GAIN-LOSS MODEL (in blue):

|      | tp   | ga   | gw  | la   | lw   |
|------|------|------|-----|------|------|
| val: | 1.55 | 2.09 | 0.3 | 3.79 | 5.64 |
| sd:  | NaN  | NaN  | NaN | NaN  | NaN  |

|       | CNST  | HILL  | GNLS  |
|-------|-------|-------|-------|
| AIC:  | 94.39 | 66.92 | 71.24 |
| PROB: | 0     | 0.9   | 0.1   |
| RMSE: | 1.91  | 1.76  | 1.75  |

MAX\_MEAN: 2.92      MAX\_MED: 1.57      BMAD: 0.164

COFF: 0.491    HIT-CALL: 1    FITC: 42    ACTP: 1

FLAGS: 10

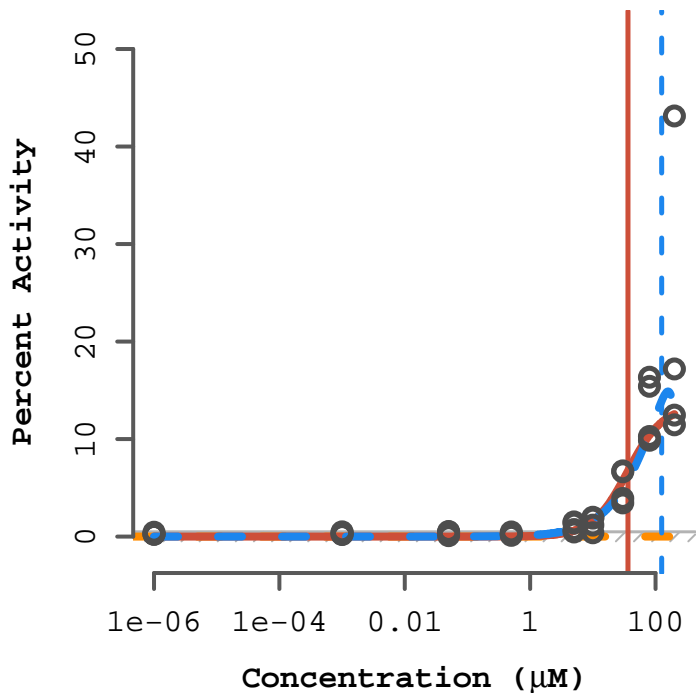

ASSAY: AEID3095 (CCTE\_Deisenroth\_DEVTOX\_RUES2-GLR\_Sox:

NAME: Lovastatin

CHID: 20784 CASRN: 75330-75-5

SPID(S): ES211\_42\_42

M4ID: 42676020

HILL MODEL (in red):

|      | tp   | ga     | gw    |
|------|------|--------|-------|
| val: | 13.5 | 1.56   | 1.55  |
| sd:  | 1.21 | 0.0899 | 0.266 |

GAIN-LOSS MODEL (in blue):

|      | tp   | ga  | gw   | la   | lw   |
|------|------|-----|------|------|------|
| val: | 28.1 | 2.1 | 1.09 | 2.35 | 8.09 |
| sd:  | NaN  | NaN | NaN  | NaN  | NaN  |

|       | CNST   | HILL   | GNLS   |
|-------|--------|--------|--------|
| AIC:  | 243.72 | 153.05 | 155.95 |
| PROB: | 0      | 0.81   | 0.19   |
| RMSE: | 9.55   | 5.36   | 5.37   |

MAX\_MEAN: 21.1 MAX\_MED: 14.8 BMAD: 0.164

COFF: 0.491 HIT-CALL: 1 FITC: 42 ACTP: 1

FLAGS: 10

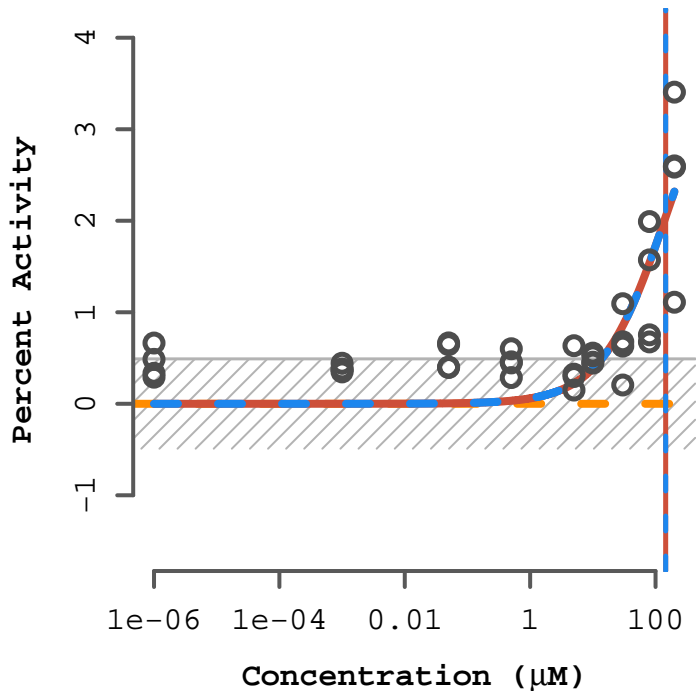

ASSAY: AEID3095 (CCTE\_Deisenroth\_DEVTOX\_RUES2-GLR\_Sox:

NAME: Busulfan

CHID: 20910 CASRN: 55-98-1

SPID(S): ES211\_18\_18

M4ID: 42676012

HILL MODEL (in red):

|      | tp   | ga    | gw    |
|------|------|-------|-------|
| val: | 4.09 | 2.16  | 0.846 |
| sd:  | 1.58 | 0.384 | 0.253 |

GAIN-LOSS MODEL (in blue):

|      | tp   | ga    | gw    | la   | lw   |
|------|------|-------|-------|------|------|
| val: | 4.09 | 2.16  | 0.846 | 4.18 | 3.69 |
| sd:  | 1.58 | 0.385 | 0.253 | 337  | 666  |

|       | CNST  | HILL  | GNLS  |
|-------|-------|-------|-------|
| AIC:  | 102.5 | 60.87 | 64.87 |
| PROB: | 0     | 0.88  | 0.12  |
| RMSE: | 1.07  | 0.49  | 0.49  |

MAX\_MEAN: 2.43      MAX\_MED: 2.59      BMAD: 0.164

COFF: 0.491    HIT-CALL: 1    FITC: 42    ACTP: 1

FLAGS:



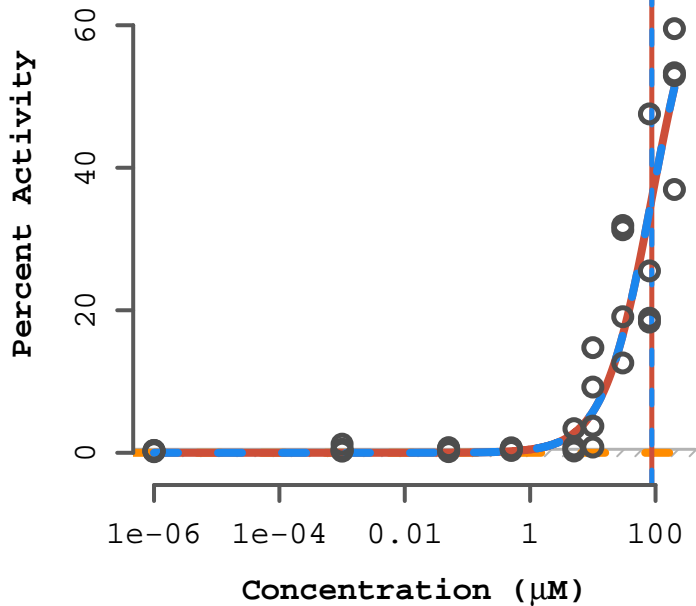

ASSAY: AEID3095 (CCTE\_Deisenroth\_DEVTOX\_RUES2-GLR\_Sox)

NAME: all-trans-Retinoic acid

CHID: 21239 CASRN: 302-79-4

SPID(S): ES211\_13\_13

M4ID: 42676029

HILL MODEL (in red):

|      |      |       |       |
|------|------|-------|-------|
|      | tp   | ga    | gw    |
| val: | 71.4 | 1.94  | 1.12  |
| sd:  | 20.1 | 0.311 | 0.233 |

GAIN-LOSS MODEL (in blue):

|      |      |       |       |      |      |
|------|------|-------|-------|------|------|
|      | tp   | ga    | gw    | la   | lw   |
| val: | 71.4 | 1.94  | 1.12  | 3.47 | 7.6  |
| sd:  | 20.1 | 0.311 | 0.233 | 1270 | 8260 |

|       |        |        |        |
|-------|--------|--------|--------|
|       | CNST   | HILL   | GNLS   |
| AIC:  | 328.72 | 240.72 | 244.72 |
| PROB: | 0      | 0.88   | 0.12   |
| RMSE: | 21.74  | 6.72   | 6.72   |

MAX\_MEAN: 50.7 MAX\_MED: 53.1 BMAD: 0.164

COFF: 0.491 HIT-CALL: 1 FITC: 42 ACTP: 1

FLAGS: 10

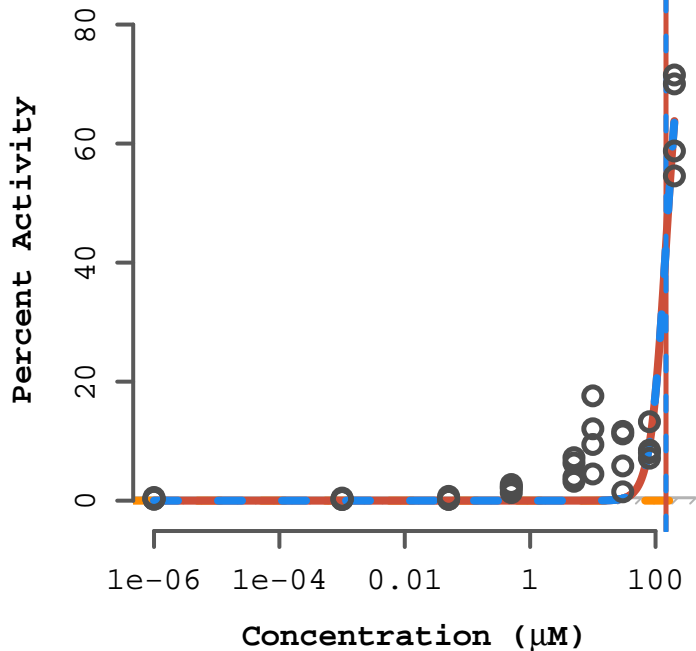

ASSAY: AEID3095 (CCTE\_Deisenroth\_DEVTOX\_RUES2-GLR\_Sox:

NAME: Dasatinib

CHID: 40979 CASRN: 302962-49-8

SPID(S): ES211\_26\_26

M4ID: 42675974

HILL MODEL (in red):

|      | tp   | ga   | gw   |
|------|------|------|------|
| val: | 85.8 | 2.17 | 3.44 |
| sd:  | NaN  | NaN  | NaN  |

GAIN-LOSS MODEL (in blue):

|      | tp   | ga   | gw   | la   | lw   |
|------|------|------|------|------|------|
| val: | 85.8 | 2.17 | 3.44 | 3.16 | 11.3 |
| sd:  | NaN  | NaN  | NaN  | NaN  | NaN  |

|       | CNST   | HILL   | GNLS   |
|-------|--------|--------|--------|
| AIC:  | 299.98 | 233.63 | 237.63 |
| PROB: | 0      | 0.88   | 0.12   |
| RMSE: | 22.25  | 5.8    | 5.8    |

MAX\_MEAN: 63.7 MAX\_MED: 64.4 BMAD: 0.164

COFF: 0.491 HIT-CALL: 1 FITC: 42 ACTP: 1

FLAGS: 10

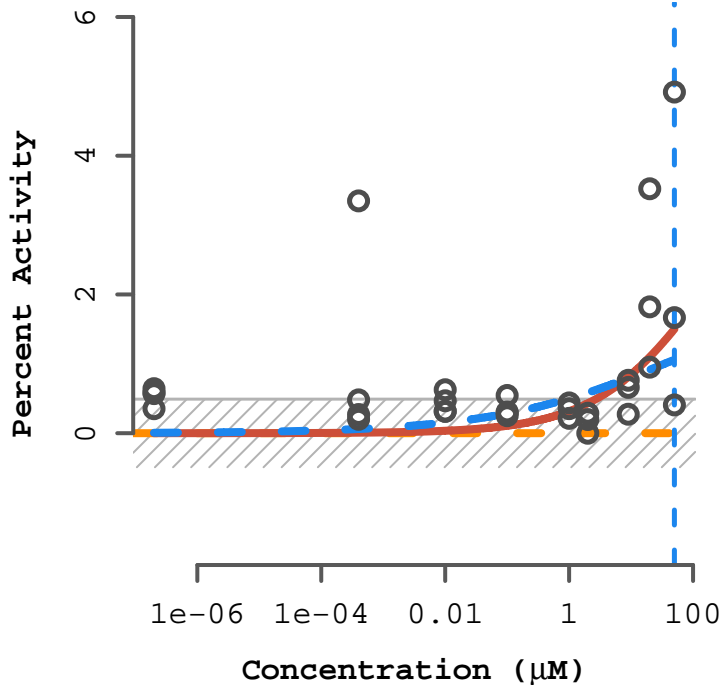

ASSAY: AEID3095 (CCTE\_Deisenroth\_DEVTOX\_RUES2-GLR\_Sox)

NAME: Ritanserin

CHID: 42594 CASRN: 87051-43-2

SPID(S): ES211\_53\_53

M4ID: 42675980

HILL MODEL (in red):

|      |      |      |       |
|------|------|------|-------|
|      | tp   | ga   | gw    |
| val: | 4.15 | 2.2  | 0.493 |
| sd:  | 7.48 | 3.09 | 0.561 |

GAIN-LOSS MODEL (in blue):

|      |      |     |     |      |      |
|------|------|-----|-----|------|------|
|      | tp   | ga  | gw  | la   | lw   |
| val: | 2.12 | 1.7 | 0.3 | 3.45 | 7.86 |
| sd:  | NaN  | NaN | NaN | NaN  | NaN  |

|       |       |              |       |
|-------|-------|--------------|-------|
|       | CNST  | <b>HILL</b>  | GNLS  |
| AIC:  | 95.45 | <b>80.89</b> | 85.31 |
| PROB: | 0     | <b>0.9</b>   | 0.1   |
| RMSE: | 1.39  | <b>1.04</b>  | 1.09  |

MAX\_MEAN: 2.33      MAX\_MED: 1.82      BMAD: 0.164

COFF: 0.491    HIT-CALL: 1    FITC: 42    ACTP: 1

FLAGS: 10

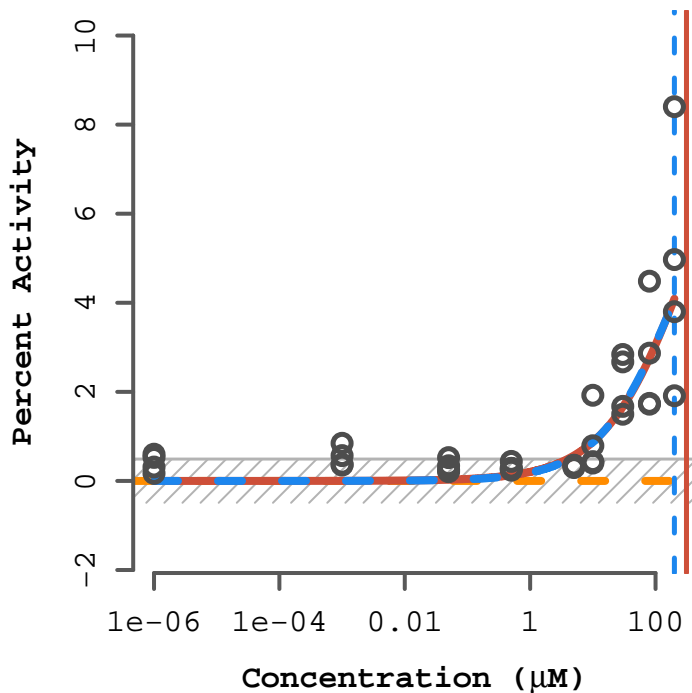

ASSAY: AEID3095 (CCTE\_Deisenroth\_DEVTOX\_RUES2-GLR\_Sox)

NAME: 6-aminopyridine-3-carboxamide

CHID: 51446 CASRN: 329-89-5

SPID(S): ES211\_7\_7

M4ID: 42676013

HILL MODEL (in red):

|      | tp   | ga   | gw    |
|------|------|------|-------|
| val: | 9.6  | 2.49 | 0.668 |
| sd:  | 28.2 | 3.39 | 0.631 |

GAIN-LOSS MODEL (in blue):

|      | tp   | ga   | gw    | la   | lw   |
|------|------|------|-------|------|------|
| val: | 8.13 | 2.3  | 0.709 | 3.67 | 5.06 |
| sd:  | 15.5 | 2.22 | 0.552 | 542  | 2030 |

|       | CNST   | HILL  | GNLS  |
|-------|--------|-------|-------|
| AIC:  | 149.89 | 95.21 | 99.22 |
| PROB: | 0      | 0.88  | 0.12  |
| RMSE: | 2.21   | 1     | 1     |

MAX\_MEAN: 4.77 MAX\_MED: 4.39 BMAD: 0.164

COFF: 0.491 HIT-CALL: 1 FITC: 42 ACTP: 1

FLAGS: 10

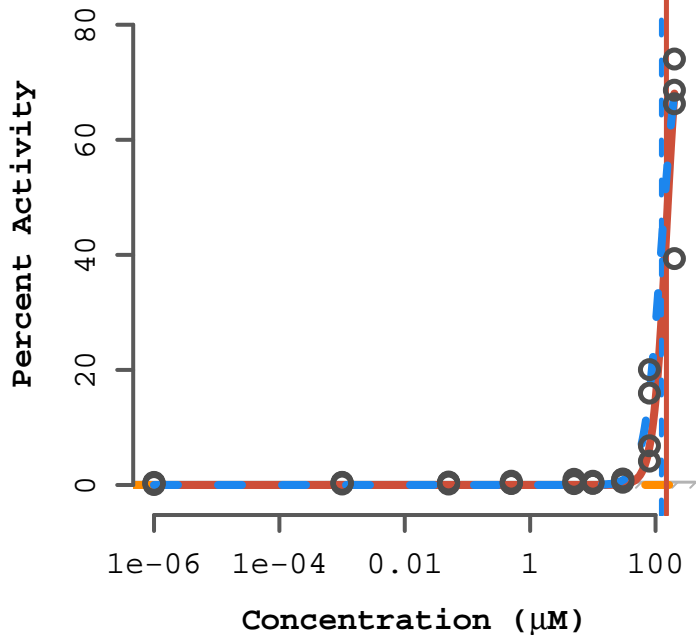

ASSAY: AEID3095 (CCTE\_Deisenroth\_DEVTOX\_RUES2-GLR\_Sox:

NAME: Pomalidomide

CHID: 893458 CASRN: 19171-19-8

SPID(S): ES211\_50\_50

M4ID: 42675987

HILL MODEL (in red):

|      |      |         |       |
|------|------|---------|-------|
|      | tp   | ga      | gw    |
| val: | 88.9 | 2.17    | 4.04  |
| sd:  | 2.48 | 0.00953 | 0.232 |

GAIN-LOSS MODEL (in blue):

|      |      |      |      |      |      |
|------|------|------|------|------|------|
|      | tp   | ga   | gw   | la   | lw   |
| val: | 83.3 | 2.09 | 3.25 | 4.07 | 1.16 |
| sd:  | NaN  | NaN  | NaN  | NaN  | NaN  |

|       |        |               |       |
|-------|--------|---------------|-------|
|       | CNST   | <b>HILL</b>   | GNLS  |
| AIC:  | 274.19 | <b>166.49</b> | 169.9 |
| PROB: | 0      | <b>0.85</b>   | 0.15  |
| RMSE: | 21.64  | <b>5.63</b>   | 5.56  |

MAX\_MEAN: 62.1 MAX\_MED: 67.4 BMAD: 0.164

COFF: 0.491 HIT-CALL: 1 FITC: 42 ACTP: 1

FLAGS: 10

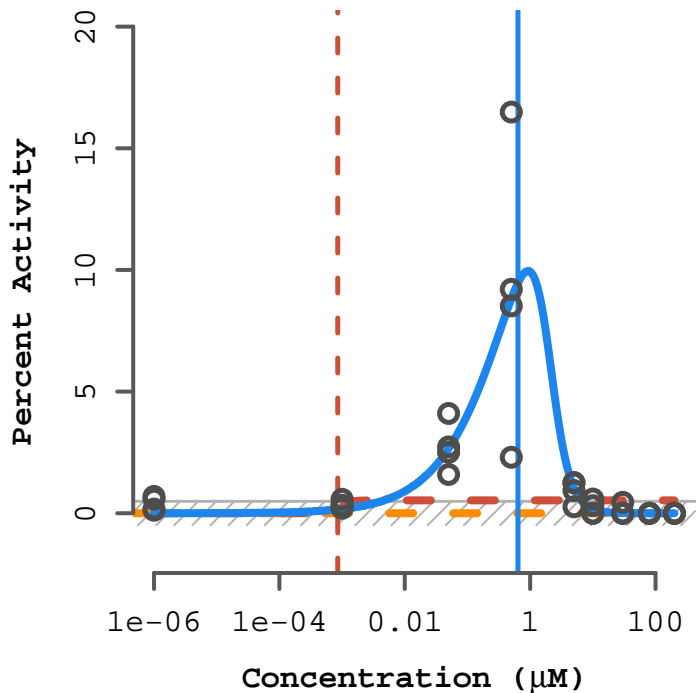

ASSAY: AEID3095 (CCTE\_Deisenroth\_DEVTOX\_RUES2-GLR\_Sox)

NAME: Adriamycin hydrochloride

CHID: 30636 CASRN: 25316-40-9

SPID(S): ES211\_67\_67

M4ID: 42676030

HILL MODEL (in red):

|      | tp    | ga    | gw   |
|------|-------|-------|------|
| val: | 0.529 | -3.07 | 4.45 |
| sd:  | 0.215 | 4.01  | 260  |

GAIN-LOSS MODEL (in blue):

|      | tp   | ga     | gw    | la    | lw   |
|------|------|--------|-------|-------|------|
| val: | 19.8 | -0.194 | 0.731 | 0.285 | 2.81 |
| sd:  | 11   | 0.629  | 0.174 | 0.187 | 1.15 |

|       | CNST   | HILL   | GNLS  |
|-------|--------|--------|-------|
| AIC:  | 155.86 | 154.12 | 87.17 |
| PROB: | 0      | 0      | 1     |
| RMSE: | 3.63   | 3.44   | 1.72  |

MAX\_MEAN: 9.13 MAX\_MED: 8.86 BMAD: 0.164

COFF: 0.491 HIT-CALL: 1 FITC: 50 ACTP: 1

FLAGS: 10

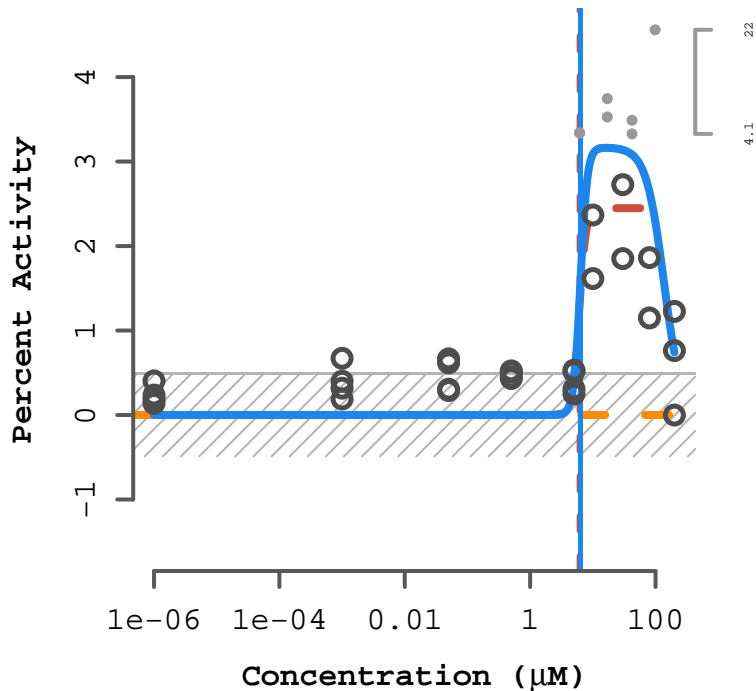

ASSAY: AEID3095 (CCTE\_Deisenroth\_DEVTOX\_RUES2-GLR\_Sox:

NAME: Gefitinib

CHID: 41034 CASRN: 184475-35-2

SPID(S): ES211\_34\_34

M4ID: 42675972 BRK

HILL MODEL (in red):

|      | tp    | ga     | gw   |
|------|-------|--------|------|
| val: | 2.45  | 0.781  | 8    |
| sd:  | 0.448 | 0.0778 | 5.92 |

GAIN-LOSS MODEL (in blue):

|      | tp    | ga    | gw   | la    | lw   |
|------|-------|-------|------|-------|------|
| val: | 3.17  | 0.803 | 8    | 2.13  | 3.06 |
| sd:  | 0.705 | 0.142 | 10.1 | 0.197 | 3.13 |

|       | CNST   | HILL   | GNLS   |
|-------|--------|--------|--------|
| AIC:  | 181.75 | 156.73 | 151.14 |
| PROB: | 0      | 0.06   | 0.94   |
| RMSE: | 4.59   | 3.74   | 3.89   |

MAX\_MEAN: 5.99 MAX\_MED: 4.85 BMAD: 0.164

COFF: 0.491 HIT-CALL: 1 FITC: 50 ACTP: 1

FLAGS: 10

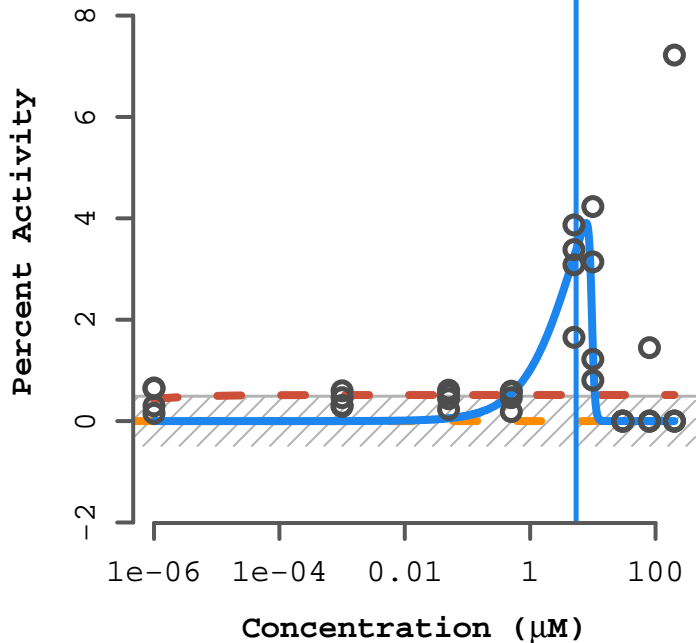

ASSAY: AEID3095 (CCTE\_Deisenroth\_DEVTOX\_RUES2-GLR\_Sox)

NAME: Sunitinib malate

CHID: 46492 CASRN: 341031-54-7

SPID(S): ES211\_60\_60

M4ID: 42676035

HILL MODEL (in red):

|      | tp    | ga  | gw    |
|------|-------|-----|-------|
| val: | 0.514 | -7  | 0.741 |
| sd:  | NaN   | NaN | NaN   |

GAIN-LOSS MODEL (in blue):

|      | tp   | ga    | gw   | la    | lw  |
|------|------|-------|------|-------|-----|
| val: | 6.74 | 0.733 | 1.03 | 0.983 | 18  |
| sd:  | NaN  | NaN   | NaN  | NaN   | NaN |

|       | CNST   | HILL   | GNLS  |
|-------|--------|--------|-------|
| AIC:  | 132.23 | 125.23 | 97.06 |
| PROB: | 0      | 0      | 1     |
| RMSE: | 1.87   | 1.65   | 1.4   |

MAX\_MEAN: 3 MAX\_MED: 3.23 BMAD: 0.164

COFF: 0.491 HIT-CALL: 1 FITC: 50 ACTP: 1

FLAGS: 10



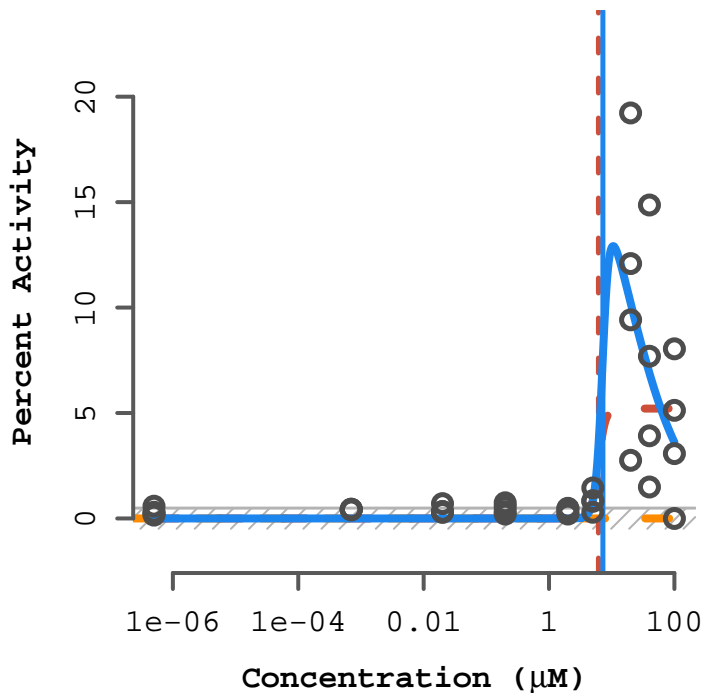

ASSAY: AEID3095 (CCTE\_Deisenroth\_DEVTOX\_RUES2-GLR\_Sox)

NAME: Vandetanib

CHID: 46681 CASRN: 443913-73-3

SPID(S): ES211\_64\_64

M4ID: 42676006

HILL MODEL (in red):

|      | tp   | ga    | gw   |
|------|------|-------|------|
| val: | 5.21 | 0.788 | 7.97 |
| sd:  | 1.17 | 0.7   | 62.8 |

GAIN-LOSS MODEL (in blue):

|      | tp   | ga    | gw   | la   | lw    |
|------|------|-------|------|------|-------|
| val: | 23.1 | 0.859 | 7.98 | 1.19 | 0.906 |
| sd:  | 23.4 | 0.628 | 31.2 | 0.9  | 0.449 |

|       | CNST   | HILL   | GNLS   |
|-------|--------|--------|--------|
| AIC:  | 203.88 | 175.35 | 169.54 |
| PROB: | 0      | 0.05   | 0.95   |
| RMSE: | 5.32   | 3.44   | 2.8    |

MAX\_MEAN: 10.9 MAX\_MED: 10.8 BMAD: 0.164

COFF: 0.491 HIT-CALL: 1 FITC: 50 ACTP: 1

FLAGS: 10

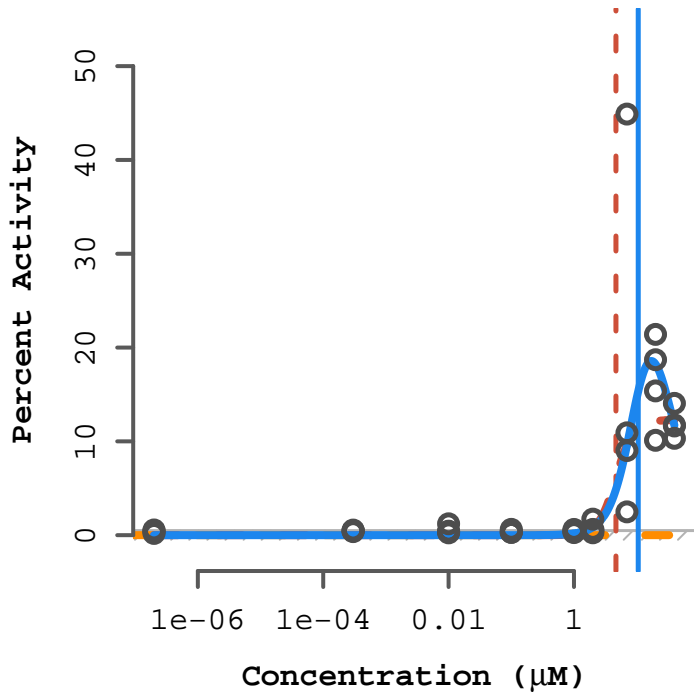

ASSAY: AEID3095 (CCTE\_Deisenroth\_DEVTOX\_RUES2-GLR\_Sox)

NAME: Dorsomorphin

CHID: 1006988 CASRN: 866405-64-3

SPID(S): ES211\_6\_6

M4ID: 42675990

HILL MODEL (in red):

|      | tp    | ga     | gw    |
|------|-------|--------|-------|
| val: | 12.3  | 0.669  | 3.17  |
| sd:  | 0.814 | 0.0624 | 0.713 |

GAIN-LOSS MODEL (in blue):

|      | tp   | ga    | gw   | la    | lw    |
|------|------|-------|------|-------|-------|
| val: | 38.7 | 1.03  | 2.27 | 1.39  | 1.59  |
| sd:  | 11.5 | 0.113 | 0.55 | 0.136 | 0.466 |

|       | CNST   | HILL   | GNLS   |
|-------|--------|--------|--------|
| AIC:  | 261.96 | 174.11 | 165.95 |
| PROB: | 0      | 0.02   | 0.98   |
| RMSE: | 10.48  | 6.36   | 6.23   |

MAX\_MEAN: 16.8      MAX\_MED: 17      BMAD: 0.164

COFF: 0.491    HIT-CALL: 1    FITC: 50    ACTP: 1

FLAGS: 10

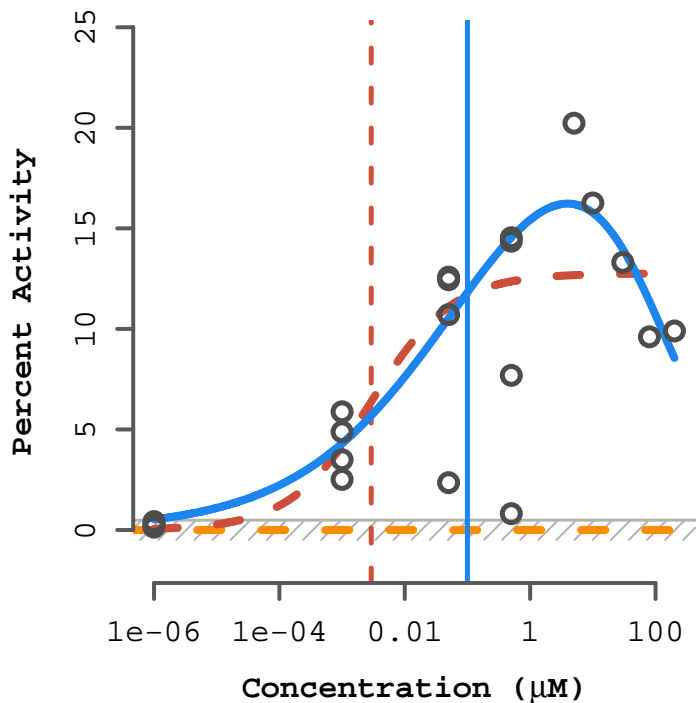

ASSAY: AEID3095 (CCTE\_Deisenroth\_DEVTOX\_RUES2-GLR\_Sox)

NAME: Actinomycin D

CHID: 20031 CASRN: 50-76-0

SPID(S): ES211\_11\_11

M4ID: 42676037

HILL MODEL (in red):

|      | tp   | ga    | gw    |
|------|------|-------|-------|
| val: | 12.8 | -2.54 | 0.667 |
| sd:  | 1.53 | 0.38  | 0.342 |

GAIN-LOSS MODEL (in blue):

|      | tp   | ga   | gw    | la    | lw    |
|------|------|------|-------|-------|-------|
| val: | 24   | -1   | 0.33  | 1.98  | 0.622 |
| sd:  | 19.4 | 2.19 | 0.158 | 0.844 | 0.356 |

|       | CNST   | HILL   | GNLS   |
|-------|--------|--------|--------|
| AIC:  | 159.74 | 121.87 | 119.45 |
| PROB: | 0      | 0.23   | 0.77   |
| RMSE: | 9.83   | 4.02   | 4.02   |

MAX\_MEAN: 20.2 MAX\_MED: 20.2 BMAD: 0.164

COFF: 0.491 HIT-CALL: 1 FITC: 51 ACTP: 1

FLAGS: 10

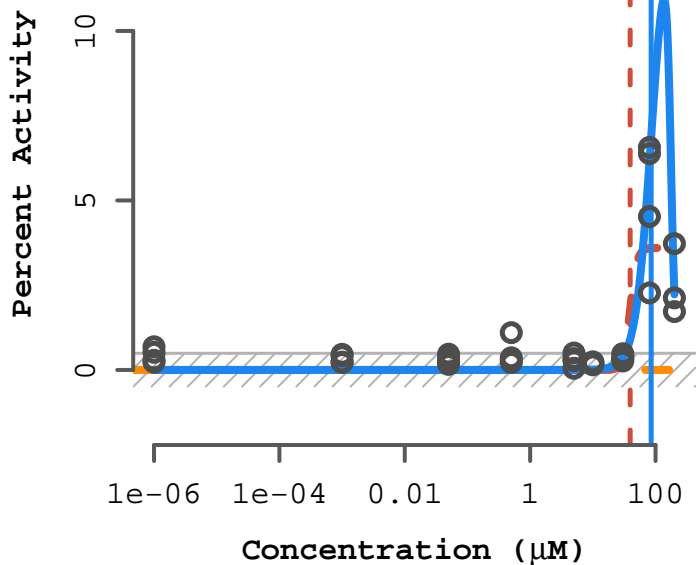

ASSAY: AEID3095 (CCTE\_Deisenroth\_DEVTOX\_RUES2-GLR\_Sox)

NAME: Mianserin hydrochloride

CHID: 944145 CASRN: 21535-47-7

SPID(S): ES211\_47\_47

M4ID: 42676023

HILL MODEL (in red):

|      | tp    | ga     | gw   |
|------|-------|--------|------|
| val: | 3.6   | 1.6    | 8    |
| sd:  | 0.671 | 0.0868 | 5.57 |

GAIN-LOSS MODEL (in blue):

|      | tp   | ga   | gw   | la   | lw   |
|------|------|------|------|------|------|
| val: | 13.7 | 1.93 | 3.43 | 2.24 | 11.9 |
| sd:  | NaN  | NaN  | NaN  | NaN  | NaN  |

|       | CNST   | HILL   | GNLS  |
|-------|--------|--------|-------|
| AIC:  | 147.02 | 108.78 | 99.19 |
| PROB: | 0      | 0.01   | 0.99  |
| RMSE: | 2.72   | 1.59   | 1.74  |

MAX\_MEAN: 4.94 MAX\_MED: 5.45 BMAD: 0.164

COFF: 0.491 HIT-CALL: 1 FITC: 51 ACTP: 1

FLAGS: 10
