# Supplementary material for: The DevTox Germ Layer Reporter Platform: An Assay Adaptation of the Human Pluripotent Stem Cell Test
Source: MDPI journal article supplement (doi:10.3390/toxics10070392), 2022-07-13
Supplement: s1 [file s1]

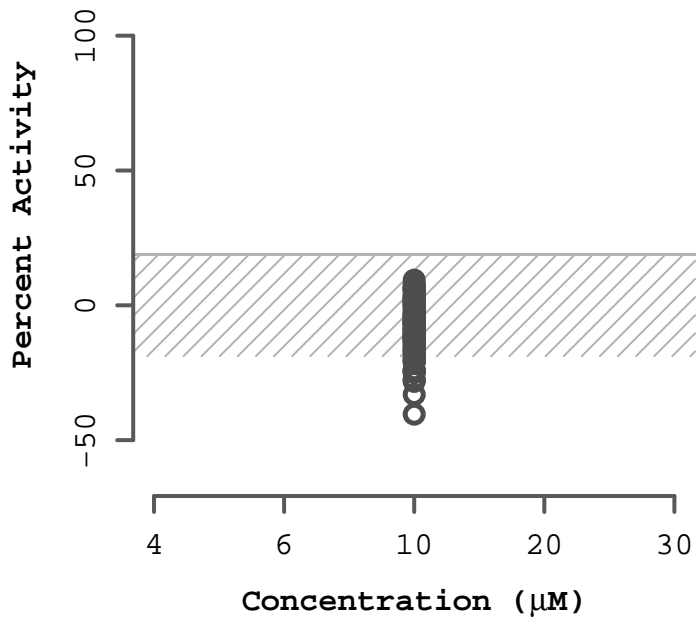

ASSAY: AEID3097 (CCTE\_Deisenroth\_DEVTOX\_RUES2-GLR\_Cel.

NAME: SB-431542

CHID: 42693 CASRN: 301836-41-9

SPID(S): ES211\_56\_56

M4ID: 42676119

HILL MODEL: Not applicable.

GAIN-LOSS MODEL: Not applicable.

|       | CNST | HILL | GNLS |
|-------|------|------|------|
| AIC:  | NA   | NA   | NA   |
| PROB: | NA   | NA   | NA   |
| RMSE: | NA   | NA   | NA   |

MAX\_MEAN: -8.7 MAX\_MED: -8.21 BMAD: 6.29

COFF: 18.9 HIT-CALL: -1 FITC: 2 ACTP: NA

FLAGS:

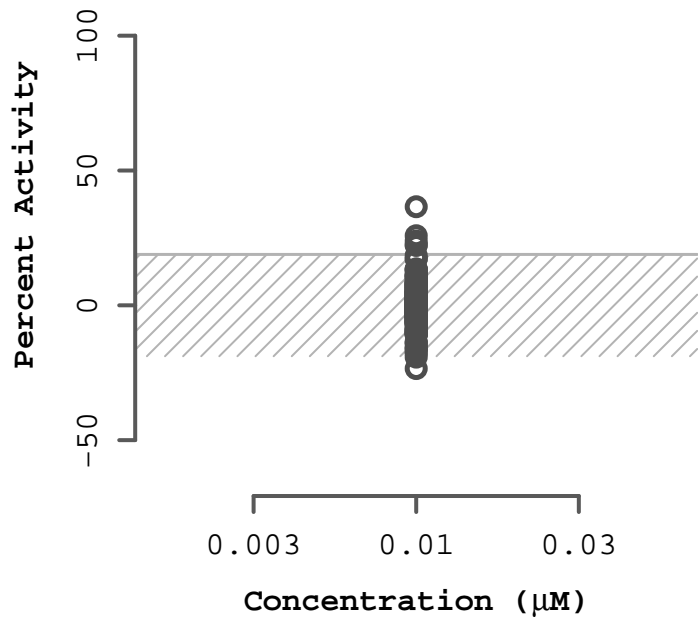

ASSAY: AEID3097 (CCTE\_Deisenroth\_DEVTOX\_RUES2-GLR\_Cel.

NAME: DMSO (spid not in DB)

CHID: NA CASRN: NA

SPID(S): DMSO

M4ID: 42676123

HILL MODEL: Not applicable.

GAIN-LOSS MODEL: Not applicable.

|       | CNST | HILL | GNLS |
|-------|------|------|------|
| AIC:  | NA   | NA   | NA   |
| PROB: | NA   | NA   | NA   |
| RMSE: | NA   | NA   | NA   |

MAX\_MEAN: 0.368 MAX\_MED: 0 BMAD: 6.29

COFF: 18.9 HIT-CALL: -1 FITC: 2 ACTP: NA

FLAGS:

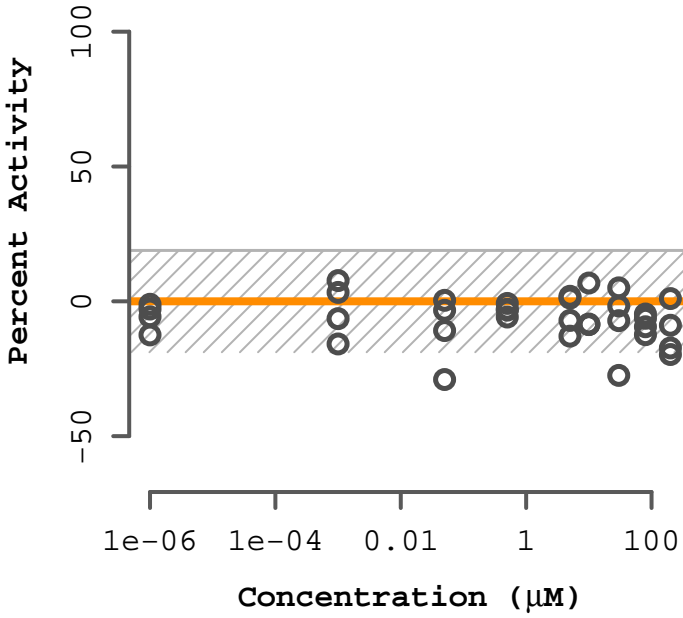

ASSAY: AEID3097 (CCTE\_Deisenroth\_DEVTOX\_RUES2-GLR\_Cel.

NAME: Acetaminophen  
CHID: 20006 CASRN: 103-90-2  
SPID(S): ES211\_9\_9  
M4ID: 42676147

HILL MODEL: Not applicable.

GAIN-LOSS MODEL: Not applicable.

|       |        |      |      |
|-------|--------|------|------|
|       | CNST   | HILL | GNLS |
| AIC:  | 272.43 | NA   | NA   |
| PROB: | 1      | NA   | NA   |
| RMSE: | 10.5   | NA   | NA   |

MAX\_MEAN: -2.8      MAX\_MED: -1.55      BMAD: 6.29

COFF: 18.9      HIT-CALL: 0      FITC: 4      ACTP: 0

FLAGS:

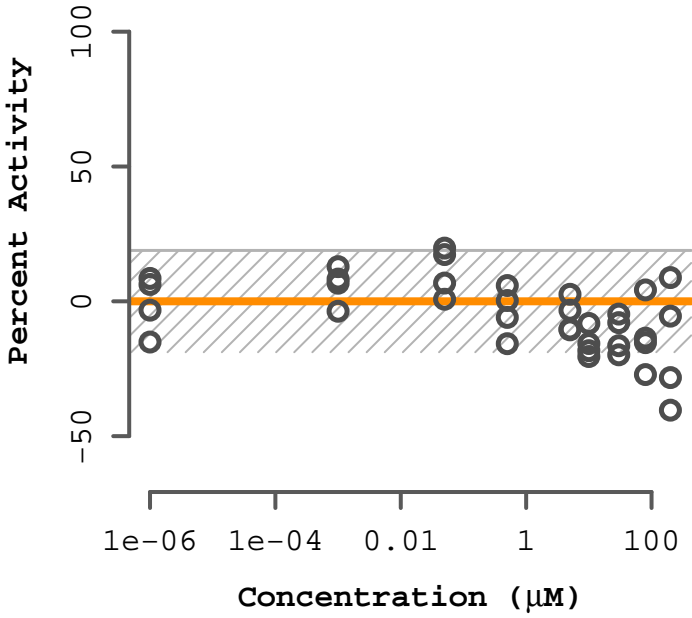

ASSAY: AEID3097 (CCTE\_Deisenroth\_DEVTOX\_RUES2-GLR\_Cel.

NAME: Acrylamide  
CHID: 20027 CASRN: 79-06-1  
SPID(S): ES211\_10\_10  
M4ID: 42676126

HILL MODEL: Not applicable.

GAIN-LOSS MODEL: Not applicable.

|       |        |      |      |
|-------|--------|------|------|
|       | CNST   | HILL | GNLS |
| AIC:  | 297.76 | NA   | NA   |
| PROB: | 1      | NA   | NA   |
| RMSE: | 14.39  | NA   | NA   |

MAX\_MEAN: 11.2      MAX\_MED: 12.1      BMAD: 6.29

COFF: 18.9      HIT-CALL: 0      FITC: 4      ACTP: 0

FLAGS:

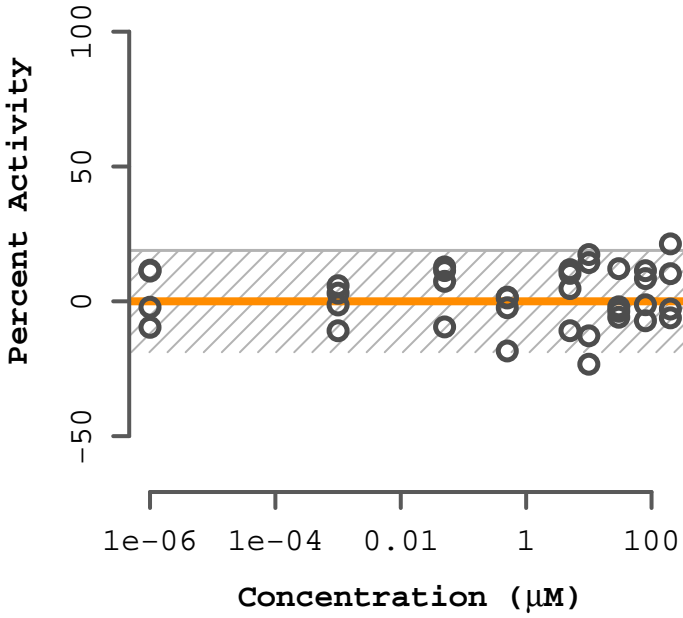

ASSAY: AEID3097 (CCTE\_Deisenroth\_DEVTOX\_RUES2-GLR\_Cel.

NAME: Aspirin  
CHID: 20108 CASRN: 50-78-2  
SPID(S): ES211\_15\_15  
M4ID: 42676143

HILL MODEL: Not applicable.

GAIN-LOSS MODEL: Not applicable.

|       |        |      |      |
|-------|--------|------|------|
|       | CNST   | HILL | GNLS |
| AIC:  | 277.55 | NA   | NA   |
| PROB: | 1      | NA   | NA   |
| RMSE: | 10.5   | NA   | NA   |

MAX\_MEAN: 5.66      MAX\_MED: 9.42      BMAD: 6.29

COFF: 18.9      HIT-CALL: 0      FITC: 4      ACTP: 0

FLAGS:

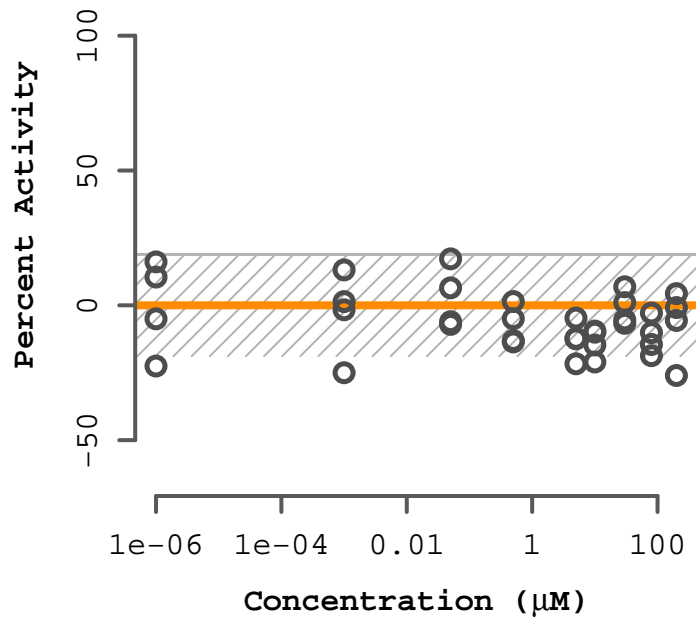

ASSAY: AEID3097 (CCTE\_Deisenroth\_DEVTOX\_RUES2-GLR\_Cel.

NAME: Boric acid ( $H_3BO_3$ )

CHID: 20194 CASRN: 10043-35-3

SPID(S): ES211\_17\_17

**M4ID: 42676161**

HILL MODEL: Not applicable.

**GAIN-LOSS MODEL:** Not applicable.

**CNST**                  **HILL**                  **GNLS**

**AIC: 289.92**      **NA**      **NA**

PROB: 1 NA NA

|             |    |    |
|-------------|----|----|
| RMSE: 12.55 | NA | NA |
|-------------|----|----|

MAX\_MEAN: 2.66      MAX\_MED: 2.75      BMAD: 6.29

COFF: 18.9 HIT-CALL: 0 FITC: 4 ACTP: 0

**FLAGS :**

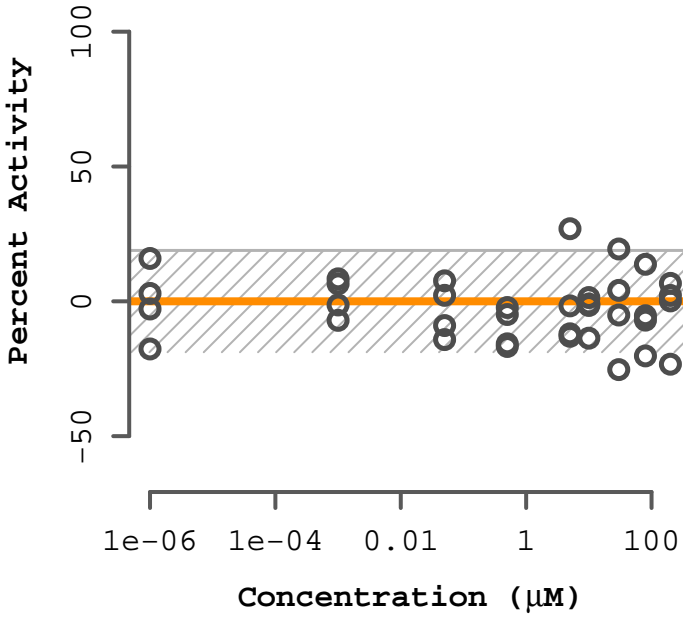

ASSAY: AEID3097 (CCTE\_Deisenroth\_DEVTOX\_RUES2-GLR\_Cel.

NAME: Caffeine  
CHID: 20232 CASRN: 58-08-2  
SPID(S): ES211\_20\_20  
M4ID: 42676116

HILL MODEL: Not applicable.

GAIN-LOSS MODEL: Not applicable.

|       |        |      |      |
|-------|--------|------|------|
|       | CNST   | HILL | GNLS |
| AIC:  | 285.32 | NA   | NA   |
| PROB: | 1      | NA   | NA   |
| RMSE: | 12.03  | NA   | NA   |

MAX\_MEAN: 1.62      MAX\_MED: 2.58      BMAD: 6.29

COFF: 18.9      HIT-CALL: 0      FITC: 4      ACTP: 0

FLAGS:

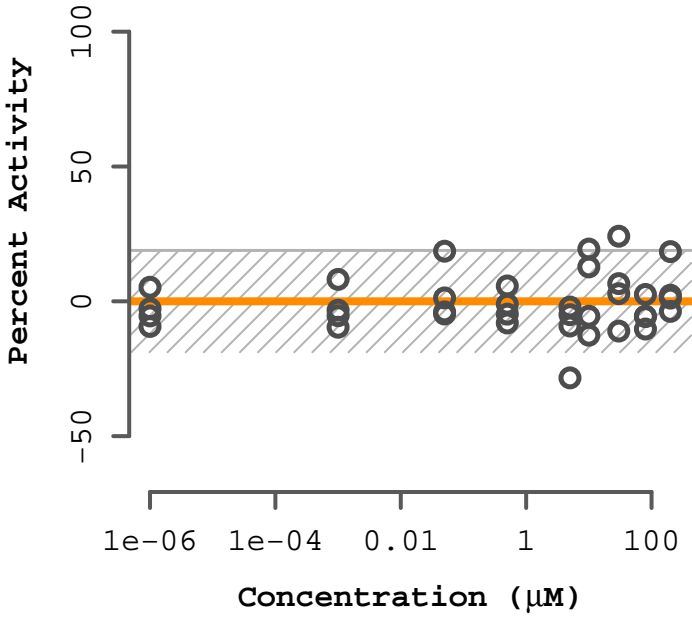

ASSAY: AEID3097 (CCTE\_Deisenroth\_DEVTOX\_RUES2-GLR\_Cel.

NAME: Ethylene glycol  
CHID: 20597 CASRN: 107-21-1  
SPID(S): ES211\_32\_32  
M4ID: 42676160

HILL MODEL: Not applicable.

GAIN-LOSS MODEL: Not applicable.

|       |        |      |      |
|-------|--------|------|------|
|       | CNST   | HILL | GNLS |
| AIC:  | 271.02 | NA   | NA   |
| PROB: | 1      | NA   | NA   |
| RMSE: | 10.26  | NA   | NA   |

MAX\_MEAN: 5.65      MAX\_MED: 4.72      BMAD: 6.29

COFF: 18.9      HIT-CALL: 0      FITC: 4      ACTP: 0

FLAGS:



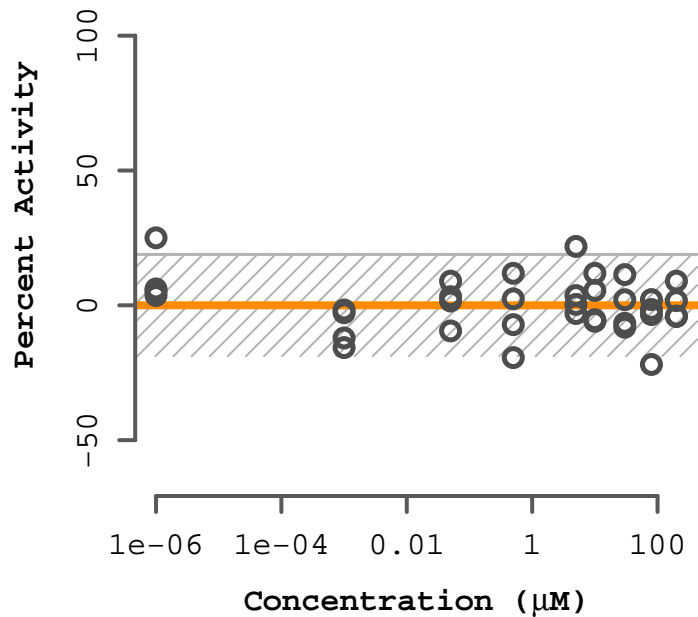

ASSAY: AEID3097 (CCTE\_Deisenroth\_DEVTOX\_RUES2-GLR\_Cel.

CHID: 20755 CASRN: 54-85-3

**M4ID: 42676153**

HILL MODEL: Not applicable.

|       | CNST   | HILL | GNLS |
|-------|--------|------|------|
| AIC:  | 267.93 | NA   | NA   |
| PROB: | 1      | NA   | NA   |
| RMSE: | 9.8    | NA   | NA   |

PROB: 1

**RMSE: 9.8**

HILL

NA

NA

NA

**G-NLS**

NA

NA

NA

MAX\_MEAN: 10                      MAX\_MED: 5.64                      BMAD: 6.29

MAX MED: 5.64

BMAD: 6.29

COFF: 18.9 HIT-CALL: 0 FITC: 4 ACTP: 0

HIT-CALL: 0

FIRC: 4

ACTP: 0

**FLAGS :**

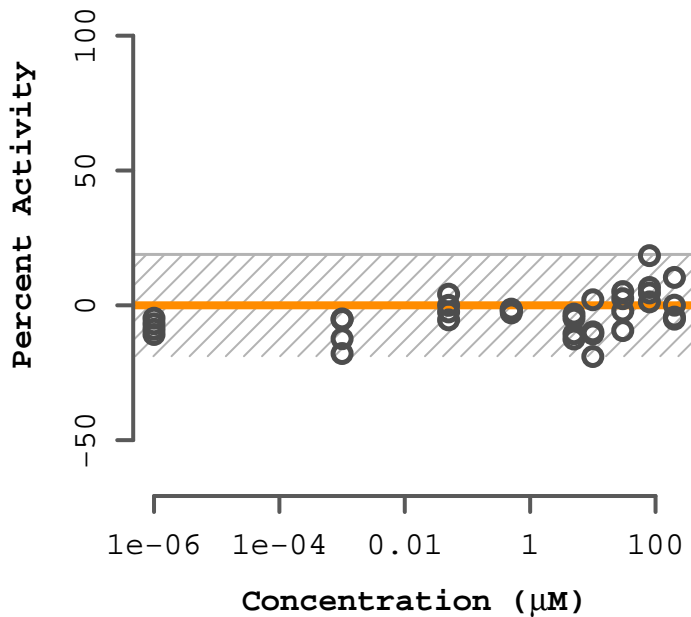

ASSAY: AEID3097 (CCTE\_Deisenroth\_DEVTOX\_RUES2-GLR\_Cel.

NAME: Methyl dopa sesquihydrate

CHID: 20863 CASRN: 41372-08-1

SPID(S): ES211\_46\_46

M4ID: 42676141

HILL MODEL: Not applicable.

GAIN-LOSS MODEL: Not applicable.

|       |        |      |      |
|-------|--------|------|------|
|       | CNST   | HILL | GNLS |
| AIC:  | 257.13 | NA   | NA   |
| PROB: | 1      | NA   | NA   |
| RMSE: | 8.19   | NA   | NA   |

MAX\_MEAN: 7.74 MAX\_MED: 5.62 BMAD: 6.29

COFF: 18.9 HIT-CALL: 0 FITC: 4 ACTP: 0

FLAGS:

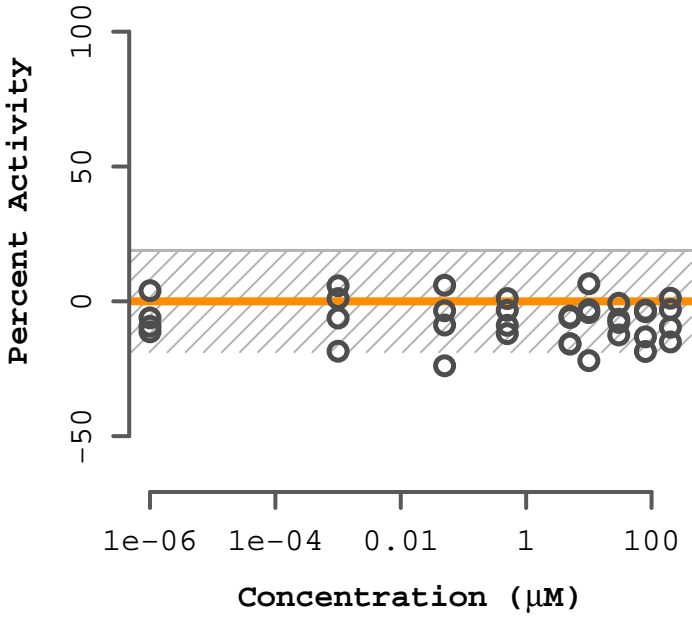

ASSAY: AEID3097 (CCTE\_Deisenroth\_DEVTOX\_RUES2-GLR\_Cel.

NAME: Nicotinic acid

CHID: 20932 CASRN: 59-67-6

SPID(S): ES211\_48\_48

M4ID: 42676134

HILL MODEL: Not applicable.

GAIN-LOSS MODEL: Not applicable.

|       |        |      |      |
|-------|--------|------|------|
|       | CNST   | HILL | GNLS |
| AIC:  | 274.93 | NA   | NA   |
| PROB: | 1      | NA   | NA   |
| RMSE: | 10.36  | NA   | NA   |

MAX\_MEAN: -4.47 MAX\_MED: -2.57 BMAD: 6.29

COFF: 18.9 HIT-CALL: 0 FITC: 4 ACTP: 0

FLAGS:

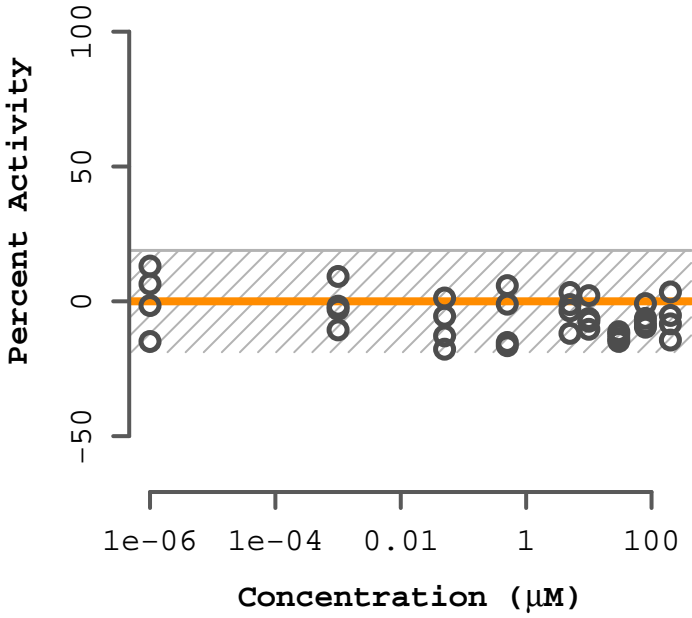

ASSAY: AEID3097 (CCTE\_Deisenroth\_DEVTOX\_RUES2-GLR\_Cel.

NAME: 1,2-Propylene glycol  
CHID: 21206 CASRN: 57-55-6  
SPID(S): ES211\_1\_1  
M4ID: 42676146

HILL MODEL: Not applicable.

GAIN-LOSS MODEL: Not applicable.

|       |        |      |      |
|-------|--------|------|------|
|       | CNST   | HILL | GNLS |
| AIC:  | 271.37 | NA   | NA   |
| PROB: | 1      | NA   | NA   |
| RMSE: | 9.53   | NA   | NA   |

MAX\_MEAN: 0.777 MAX\_MED: 2.45 BMAD: 6.29

COFF: 18.9 HIT-CALL: 0 FITC: 4 ACTP: 0

FLAGS:

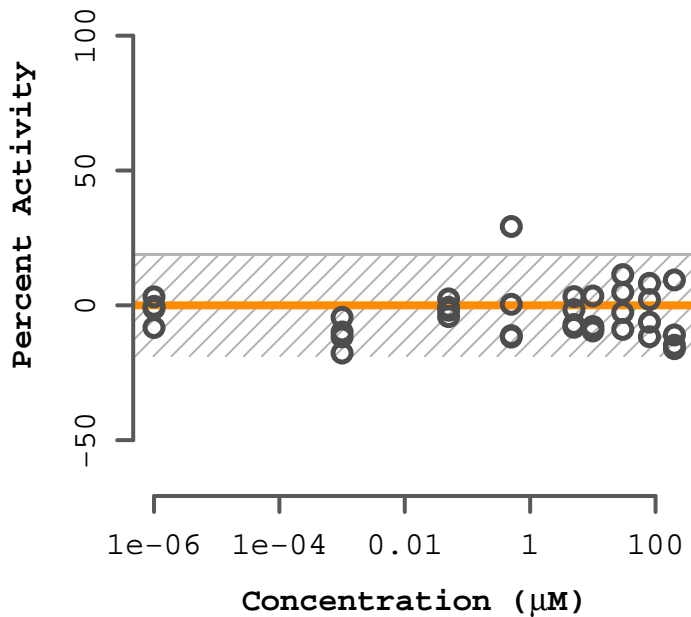

ASSAY: AEID3097 (CCTE\_Deisenroth\_DEVTOX\_RUES2-GLR\_Cel.

NAME: 6-Propyl-2-thiouracil

CHID: 21209 CASRN: 51-52-5

SPID(S): ES211\_8\_8

M4ID: 42676151

HILL MODEL: Not applicable.

GAIN-LOSS MODEL: Not applicable.

|       |        |      |      |
|-------|--------|------|------|
|       | CNST   | HILL | GNLS |
| AIC:  | 268.35 | NA   | NA   |
| PROB: | 1      | NA   | NA   |
| RMSE: | 9.63   | NA   | NA   |

MAX\_MEAN: 1.66 MAX\_MED: 1.1 BMAD: 6.29

COFF: 18.9 HIT-CALL: 0 FITC: 4 ACTP: 0

FLAGS:

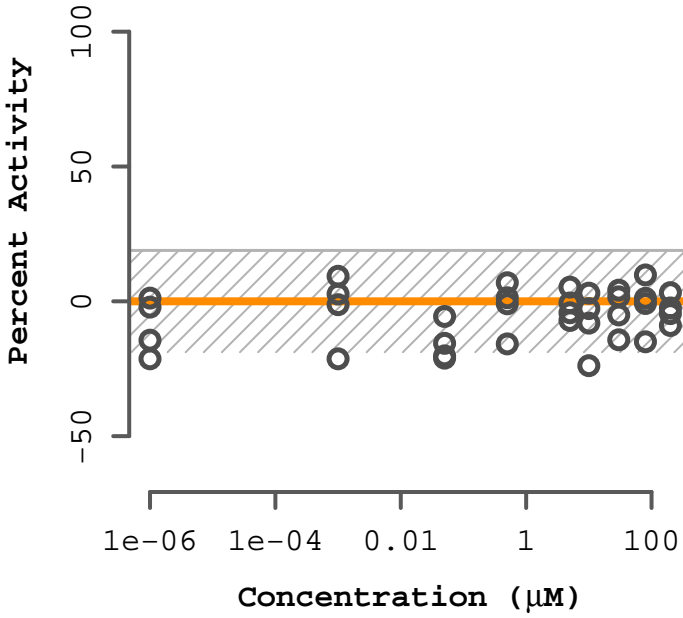

ASSAY: AEID3097 (CCTE\_Deisenroth\_DEVTOX\_RUES2-GLR\_Cel.

NAME: Saccharin

CHID: 21251 CASRN: 81-07-2

SPID(S): ES211\_54\_54

M4ID: 42676125

HILL MODEL: Not applicable.

GAIN-LOSS MODEL: Not applicable.

|       |        |      |      |
|-------|--------|------|------|
|       | CNST   | HILL | GNLS |
| AIC:  | 274.86 | NA   | NA   |
| PROB: | 1      | NA   | NA   |
| RMSE: | 10.64  | NA   | NA   |

MAX\_MEAN: -1.22 MAX\_MED: 0.748 BMAD: 6.29

COFF: 18.9 HIT-CALL: 0 FITC: 4 ACTP: 0

FLAGS:

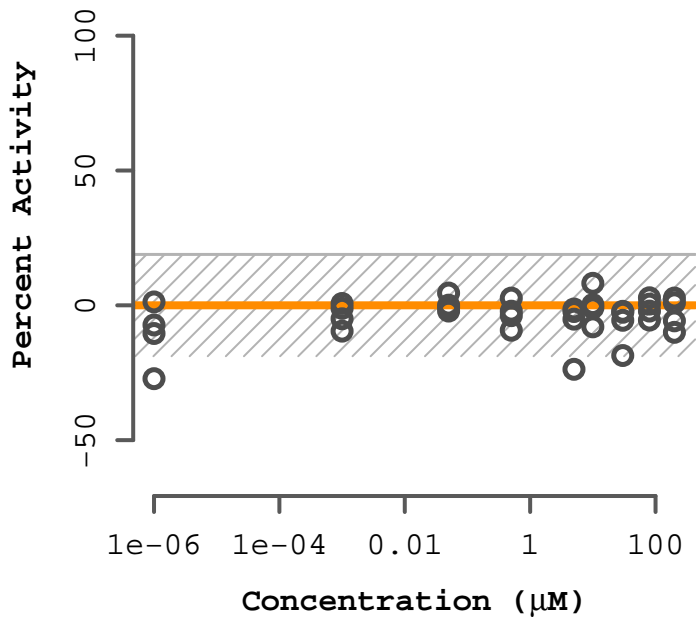

ASSAY: AEID3097 (CCTE\_Deisenroth\_DEVTOX\_RUES2-GLR\_Cel.

NAME: Sulfasalazine

CHID: 21256 CASRN: 599-79-1

SPID(S): ES211\_59\_59

M4ID: 42676138

HILL MODEL: Not applicable.

GAIN-LOSS MODEL: Not applicable.

|       |        |      |      |
|-------|--------|------|------|
|       | CNST   | HILL | GNLS |
| AIC:  | 247.51 | NA   | NA   |
| PROB: | 1      | NA   | NA   |
| RMSE: | 8.26   | NA   | NA   |

MAX\_MEAN: 0.441 MAX\_MED: -0.331 BMAD: 6.29

COFF: 18.9 HIT-CALL: 0 FITC: 4 ACTP: 0

FLAGS:

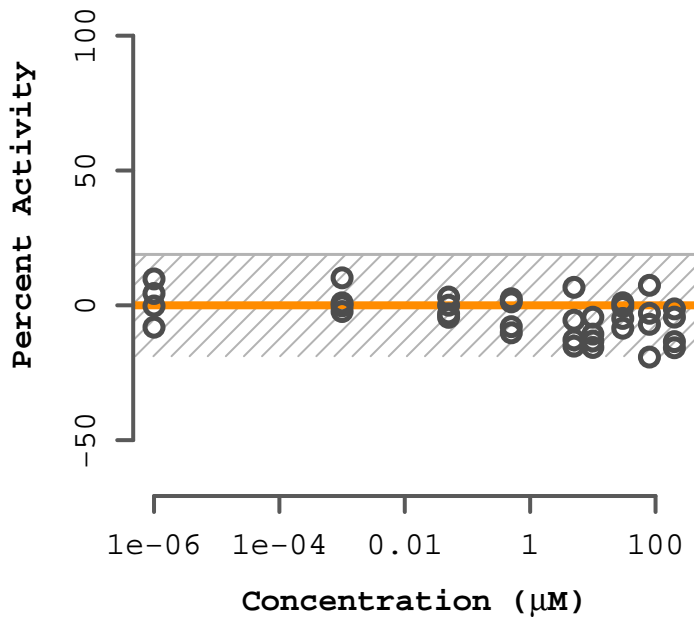

ASSAY: AEID3097 (CCTE\_Deisenroth\_DEVTOX\_RUES2-GLR\_Cel.

NAME: Dimethyl phthalate

CHID: 22455 CASRN: 131-11-3

SPID(S): ES211\_30\_30

M4ID: 42676122

HILL MODEL: Not applicable.

GAIN-LOSS MODEL: Not applicable.

|       |        |      |      |
|-------|--------|------|------|
|       | CNST   | HILL | GNLS |
| AIC:  | 260.09 | NA   | NA   |
| PROB: | 1      | NA   | NA   |
| RMSE: | 8.42   | NA   | NA   |

MAX\_MEAN: 2.16 MAX\_MED: 2.08 BMAD: 6.29

COFF: 18.9 HIT-CALL: 0 FITC: 4 ACTP: 0

FLAGS:



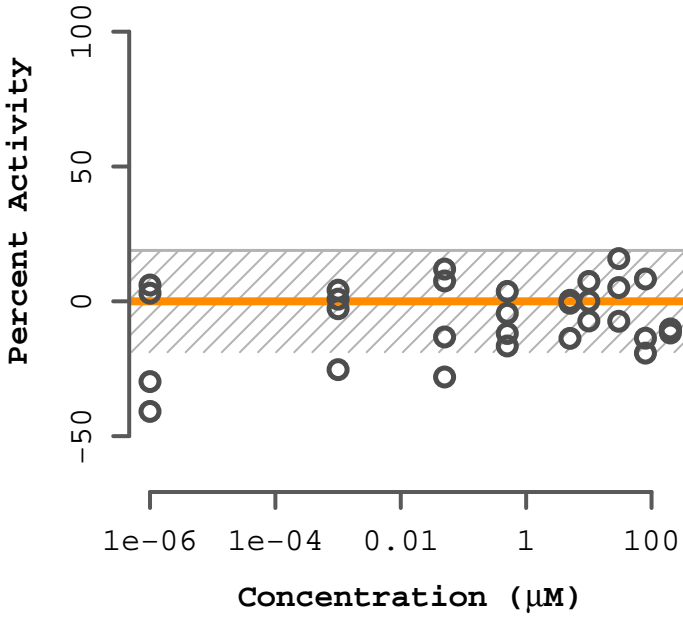

ASSAY: AEID3097 (CCTE\_Deisenroth\_DEVTOX\_RUES2-GLR\_Cel.

NAME: Folic acid

CHID: 22519 CASRN: 59-30-3

SPID(S): ES211\_33\_33

M4ID: 42676130

HILL MODEL: Not applicable.

GAIN-LOSS MODEL: Not applicable.

|       |        |      |      |
|-------|--------|------|------|
|       | CNST   | HILL | GNLS |
| AIC:  | 255.12 | NA   | NA   |
| PROB: | 1      | NA   | NA   |
| RMSE: | 14.46  | NA   | NA   |

MAX\_MEAN: 4.53 MAX\_MED: 5.12 BMAD: 6.29

COFF: 18.9 HIT-CALL: 0 FITC: 4 ACTP: 0

FLAGS:

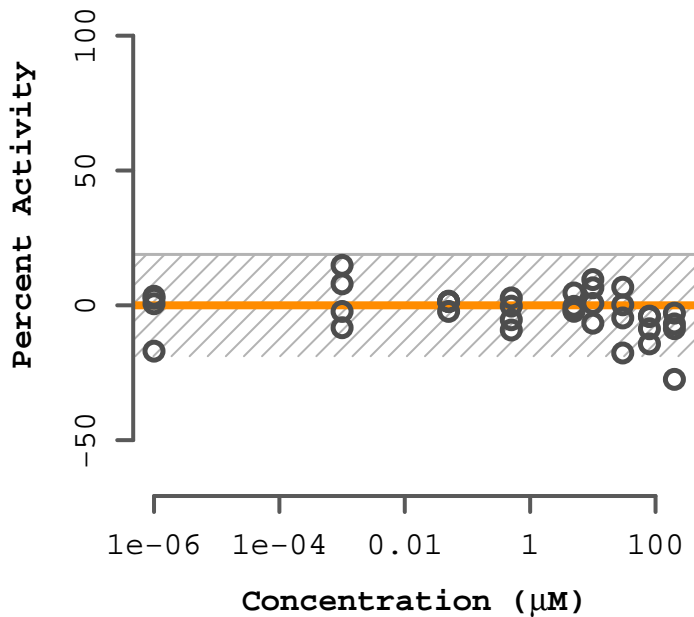

ASSAY: AEID3097 (CCTE\_Deisenroth\_DEVTOX\_RUES2-GLR\_Cel.

NAME: Acyclovir

CHID: 22556 CASRN: 59277-89-3

SPID(S): ES211\_12\_12

M4ID: 42676113

HILL MODEL: Not applicable.

GAIN-LOSS MODEL: Not applicable.

|       |        |      |      |
|-------|--------|------|------|
|       | CNST   | HILL | GNLS |
| AIC:  | 254.61 | NA   | NA   |
| PROB: | 1      | NA   | NA   |
| RMSE: | 8.47   | NA   | NA   |

MAX\_MEAN: 3.07 MAX\_MED: 3.62 BMAD: 6.29

COFF: 18.9 HIT-CALL: 0 FITC: 4 ACTP: 0

FLAGS:

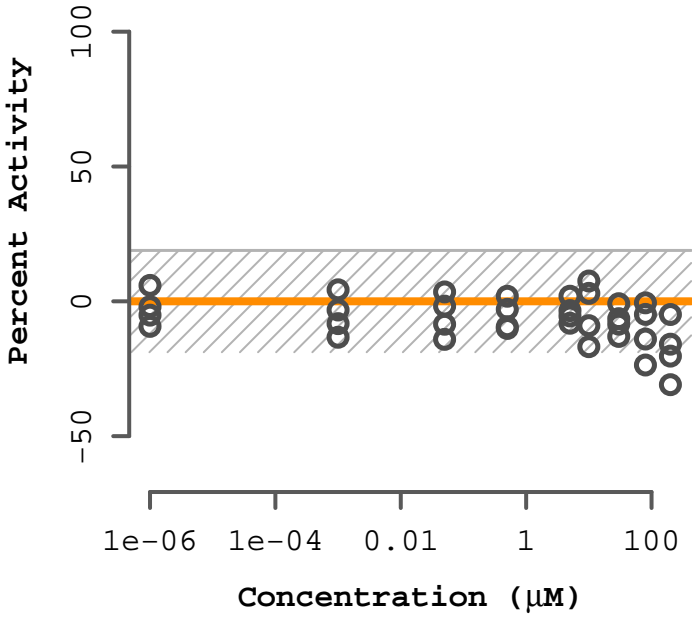

ASSAY: AEID3097 (CCTE\_Deisenroth\_DEVTOX\_RUES2-GLR\_Cel.

NAME: Valproic acid

CHID: 23733 CASRN: 99-66-1

SPID(S): ES211\_63\_63

M4ID: 42676171

HILL MODEL: Not applicable.

GAIN-LOSS MODEL: Not applicable.

|       |        |      |      |
|-------|--------|------|------|
|       | CNST   | HILL | GNLS |
| AIC:  | 275.23 | NA   | NA   |
| PROB: | 1      | NA   | NA   |
| RMSE: | 10.75  | NA   | NA   |

|                |                |            |
|----------------|----------------|------------|
| MAX_MEAN: -2.6 | MAX_MED: -3.02 | BMAD: 6.29 |
|----------------|----------------|------------|

|            |             |         |         |
|------------|-------------|---------|---------|
| COFF: 18.9 | HIT-CALL: 0 | FITC: 4 | ACTP: 0 |
|------------|-------------|---------|---------|

FLAGS:

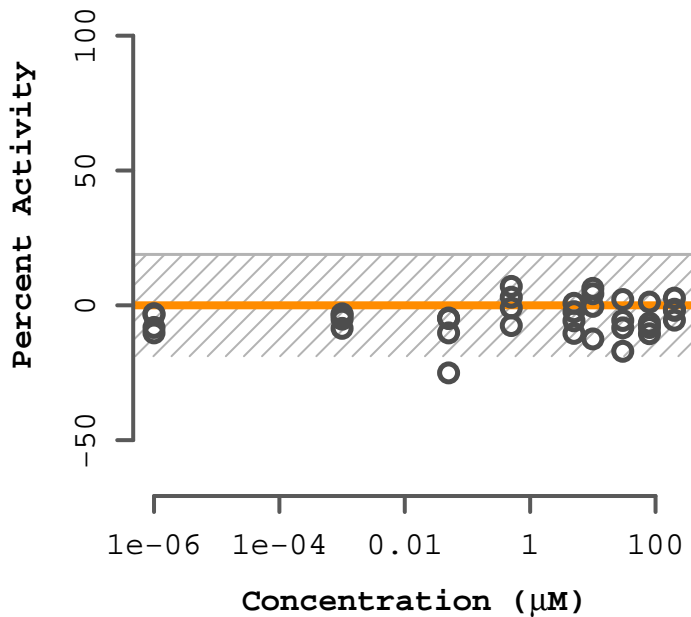

ASSAY: AEID3097 (CCTE\_Deisenroth\_DEVTOX\_RUES2-GLR\_Cel.

NAME: D-Camphor

CHID: 24721 CASRN: 464-49-3

SPID(S): ES211\_27\_27

M4ID: 42676128

HILL MODEL: Not applicable.

GAIN-LOSS MODEL: Not applicable.

|       |        |      |      |
|-------|--------|------|------|
|       | CNST   | HILL | GNLS |
| AIC:  | 252.32 | NA   | NA   |
| PROB: | 1      | NA   | NA   |
| RMSE: | 7.87   | NA   | NA   |

MAX\_MEAN: 0.405 MAX\_MED: 1.97 BMAD: 6.29

COFF: 18.9 HIT-CALL: 0 FITC: 4 ACTP: 0

FLAGS:

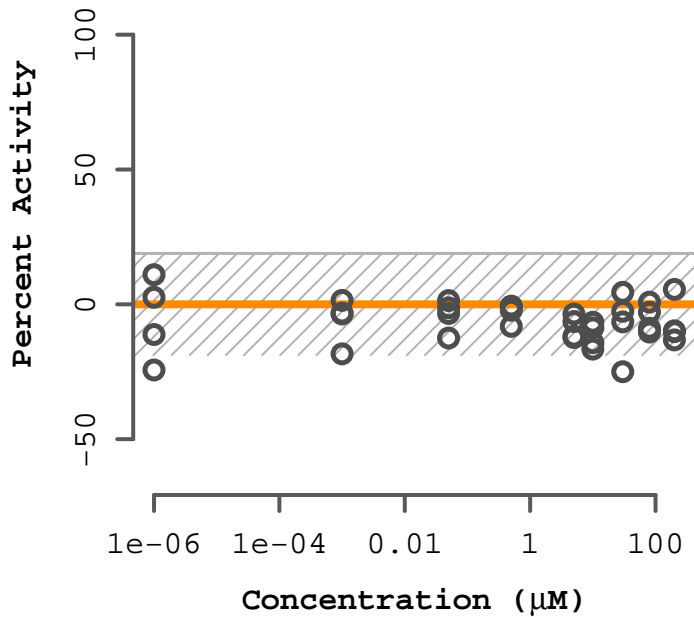

ASSAY: AEID3097 (CCTE\_Deisenroth\_DEVTOX\_RUES2-GLR\_Cel.

NAME: Salicylic acid

CHID: 26368 CASRN: 69-72-7

SPID(S): ES211\_55\_55

M4ID: 42676174

HILL MODEL: Not applicable.

GAIN-LOSS MODEL: Not applicable.

|       |       |      |      |
|-------|-------|------|------|
|       | CNST  | HILL | GNLS |
| AIC:  | 272.2 | NA   | NA   |
| PROB: | 1     | NA   | NA   |
| RMSE: | 10.11 | NA   | NA   |

MAX\_MEAN: -2.94 MAX\_MED: -1.48 BMAD: 6.29

COFF: 18.9 HIT-CALL: 0 FITC: 4 ACTP: 0

FLAGS:

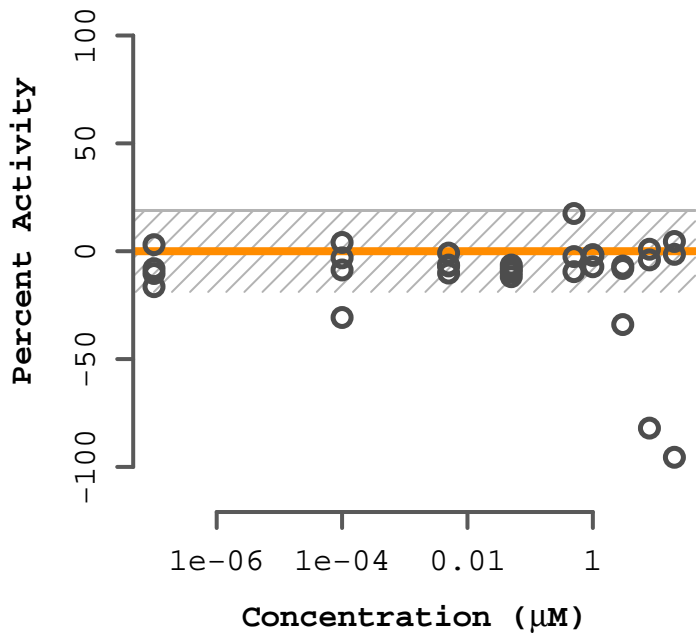

ASSAY: AEID3097 (CCTE\_Deisenroth\_DEVTOX\_RUES2-GLR\_Cel.

NAME: Cyclopamine

CHID: 43709 CASRN: 4449-51-8

SPID(S): ES211\_23\_23

M4ID: 42676156

HILL MODEL: Not applicable.

GAIN-LOSS MODEL: Not applicable.

|       |        |      |      |
|-------|--------|------|------|
|       | CNST   | HILL | GNLS |
| AIC:  | 266.73 | NA   | NA   |
| PROB: | 1      | NA   | NA   |
| RMSE: | 25.17  | NA   | NA   |

MAX\_MEAN: 1.86 MAX\_MED: -1.44 BMAD: 6.29

COFF: 18.9 HIT-CALL: 0 FITC: 4 ACTP: 0

FLAGS: 10

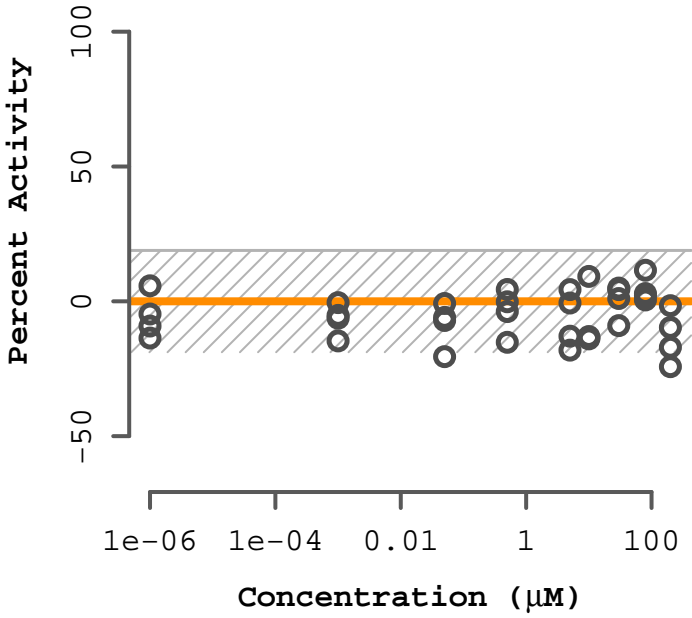

ASSAY: AEID3097 (CCTE\_Deisenroth\_DEVTOX\_RUES2-GLR\_Cel.

NAME: Penicillin G potassium  
CHID: 45106 CASRN: 113-98-4  
SPID(S): ES211\_49\_49  
M4ID: 42676168

HILL MODEL: Not applicable.

GAIN-LOSS MODEL: Not applicable.

|       |        |      |      |
|-------|--------|------|------|
|       | CNST   | HILL | GNLS |
| AIC:  | 274.19 | NA   | NA   |
| PROB: | 1      | NA   | NA   |
| RMSE: | 10.23  | NA   | NA   |

MAX\_MEAN: 4.27 MAX\_MED: 2.71 BMAD: 6.29

COFF: 18.9 HIT-CALL: 0 FITC: 4 ACTP: 0

FLAGS:

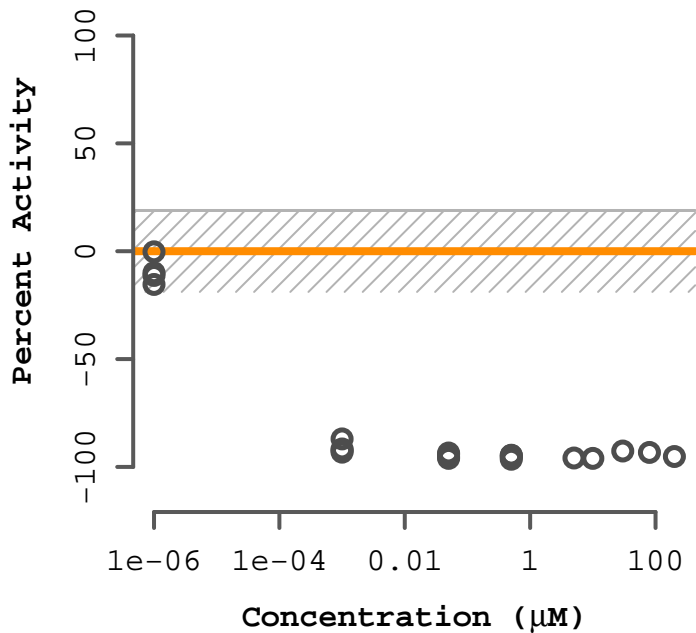

ASSAY: AEID3097 (CCTE\_Deisenroth\_DEVTOX\_RUES2-GLR\_Cel.

NAME: Actinomycin D

CHID: 20031 CASRN: 50-76-0

SPID(S): ES211\_11\_11

M4ID: 42676175

HILL MODEL: Failed to converge.

GAIN-LOSS MODEL: Failed to converge.

|       |        |      |      |
|-------|--------|------|------|
|       | CNST   | HILL | GNLS |
| AIC:  | 327.56 | NA   | NA   |
| PROB: | 1      | NA   | NA   |
| RMSE: | 84.69  | NA   | NA   |

MAX\_MEAN: -9.2 MAX\_MED: -10.6 BMAD: 6.29

COFF: 18.9 HIT-CALL: 0 FITC: 7 ACTP: 0

FLAGS: 10



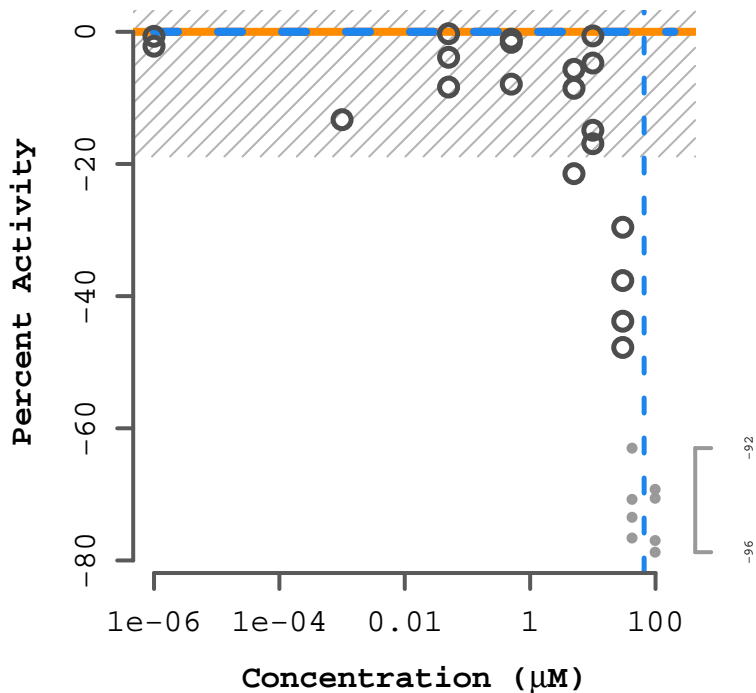

ASSAY: AEID3097 (CCTE\_Deisenroth\_DEVTOX\_RUES2-GLR\_Cel.

NAME: Bisphenol A

CHID: 20182 CASRN: 80-05-7

SPID(S): ES211\_16\_16

M4ID: 42676166 BRK

HILL MODEL (in red):

|      | tp       | ga   | gw   |
|------|----------|------|------|
| val: | 3.62e-05 | 2.76 | 5.04 |
| sd:  | NaN      | NaN  | NaN  |

GAIN-LOSS MODEL (in blue):

|      | tp       | ga   | gw  | la   | lw   |
|------|----------|------|-----|------|------|
| val: | 5.56e-08 | 1.82 | 5.9 | 2.32 | 8.88 |
| sd:  | NaN      | NaN  | NaN | NaN  | NaN  |

|       | CNST   | HILL   | GNLS   |
|-------|--------|--------|--------|
| AIC:  | 378.61 | 384.61 | 388.61 |
| PROB: | 0.95   | 0.05   | 0.01   |
| RMSE: | 47.32  | 47.32  | 47.32  |

MAX\_MEAN: 9.39 MAX\_MED: 8.13 BMAD: 6.29

COFF: 18.9 HIT-CALL: 0 FITC: 7 ACTP: 0.05

FLAGS: 10

Percent Activity

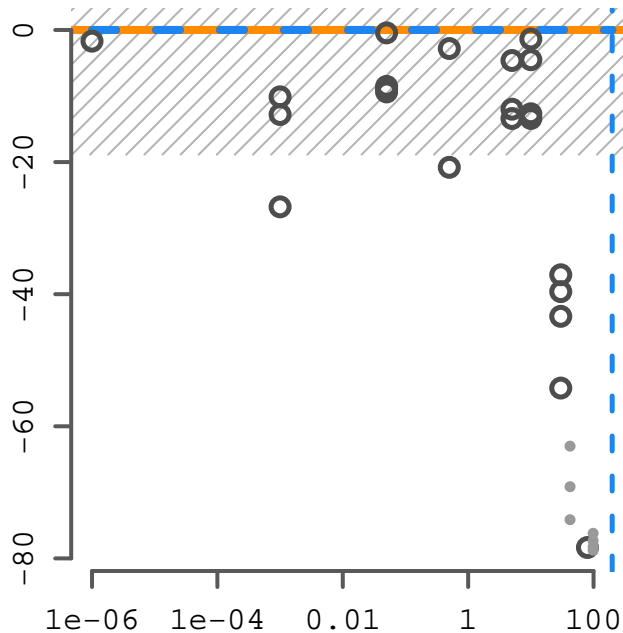

ASSAY: AEID3097 (CCTE\_Deisenroth\_DEVTOX\_RUES2-GLR\_Cel.

NAME: 4-Hydroxybenzoic acid butyl ester

CHID: 20209 CASRN: 94-26-8

SPID(S): ES211\_19\_19

M4ID: 42676150 BRK

HILL MODEL (in red):

|      | tp     | ga  | gw   |
|------|--------|-----|------|
| val: | 0.0225 | 2.8 | 7.72 |
| sd:  | NaN    | NaN | NaN  |

GAIN-LOSS MODEL (in blue):

|      | tp       | ga  | gw   | la   | lw   |
|------|----------|-----|------|------|------|
| val: | 2.73e-09 | 2.3 | 7.37 | 3.03 | 6.11 |
| sd:  | NA       | NA  | NA   | NA   | NA   |

|       | CNST   | HILL   | GNLS   |
|-------|--------|--------|--------|
| AIC:  | 376.27 | 382.27 | 386.27 |
| PROB: | 0.95   | 0.05   | 0.01   |
| RMSE: | 45.14  | 45.14  | 45.14  |

MAX\_MEAN: 8.92 MAX\_MED: 8.22 BMAD: 6.29

COFF: 18.9 HIT-CALL: 0 FITC: 7 ACTP: 0.05

FLAGS: 10

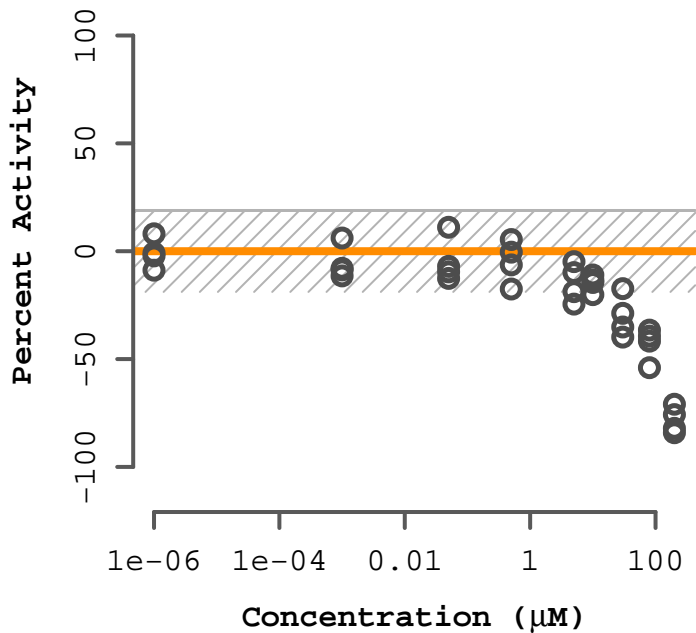

ASSAY: AEID3097 (CCTE\_Deisenroth\_DEVTOX\_RUES2-GLR\_Cel.

NAME: Diphenhydramine hydrochloride

CHID: 20537 CASRN: 147-24-0

SPID(S): ES211\_31\_31

M4ID: 42676136

HILL MODEL: Failed to converge.

GAIN-LOSS MODEL: Failed to converge.

|       |        |      |      |
|-------|--------|------|------|
|       | CNST   | HILL | GNLS |
| AIC:  | 352.61 | NA   | NA   |
| PROB: | 1      | NA   | NA   |
| RMSE: | 33.04  | NA   | NA   |

MAX\_MEAN: -0.907 MAX\_MED: -1.47 BMAD: 6.29

COFF: 18.9 HIT-CALL: 0 FITC: 7 ACTP: 0

FLAGS: 10

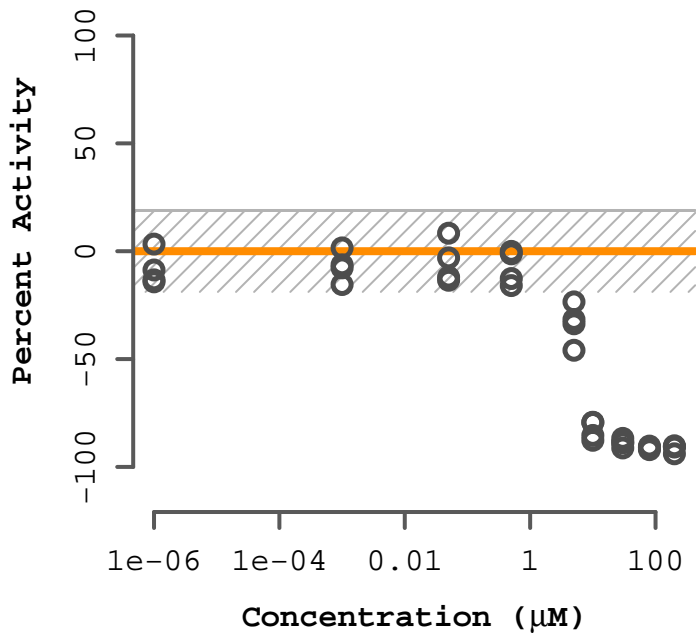

ASSAY: AEID3097 (CCTE\_Deisenroth\_DEVTOX\_RUES2-GLR\_Cel.

NAME: 5-Fluorouracil

CHID: 20634 CASRN: 51-21-8

SPID(S): ES211\_5\_5

M4ID: 42676169

HILL MODEL: Failed to converge.

GAIN-LOSS MODEL: Failed to converge.

|       |        |      |      |
|-------|--------|------|------|
|       | CNST   | HILL | GNLS |
| AIC:  | 403.55 | NA   | NA   |
| PROB: | 1      | NA   | NA   |
| RMSE: | 60.58  | NA   | NA   |

MAX\_MEAN: -5.03 MAX\_MED: -6.93 BMAD: 6.29

COFF: 18.9 HIT-CALL: 0 FITC: 7 ACTP: 0

FLAGS: 10

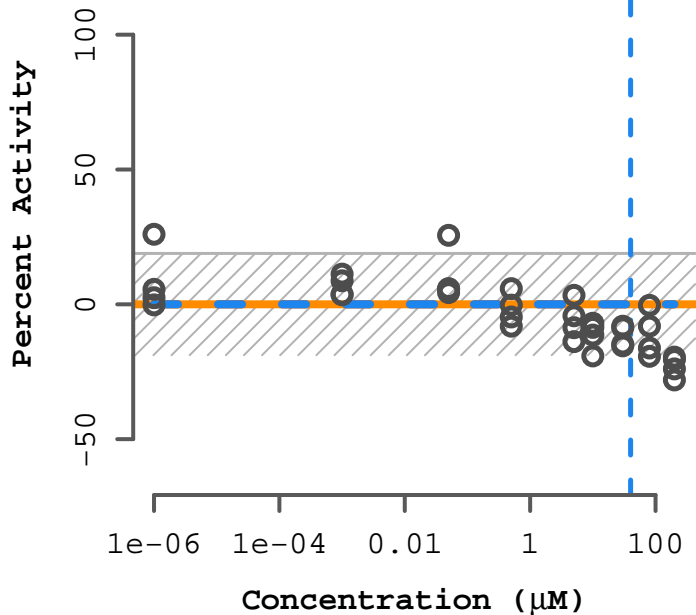

ASSAY: AEID3097 (CCTE\_Deisenroth\_DEVTOX\_RUES2-GLR\_Cel.

NAME: Ibuprofen

CHID: 20732 CASRN: 15687-27-1

SPID(S): ES211\_36\_36

M4ID: 42676158

HILL MODEL (in red):

|      | tp     | ga  | gw   |
|------|--------|-----|------|
| val: | 0.0788 | 2.8 | 7.97 |
| sd:  | NaN    | NaN | NaN  |

GAIN-LOSS MODEL (in blue):

|      | tp       | ga   | gw     | la   | lw     |
|------|----------|------|--------|------|--------|
| val: | 3.39e-08 | 1.6  | 6.99   | 1.86 | 9.04   |
| sd:  | 0.000131 | 2270 | 122000 | 966  | 173000 |

|       | CNST   | HILL   | GNLS   |
|-------|--------|--------|--------|
| AIC:  | 291.97 | 297.97 | 301.97 |
| PROB: | 0.95   | 0.05   | 0.01   |
| RMSE: | 13.09  | 13.09  | 13.09  |

MAX\_MEAN: 10.4 MAX\_MED: 6.24 BMAD: 6.29

COFF: 18.9 HIT-CALL: 0 FITC: 7 ACTP: 0.05

FLAGS:

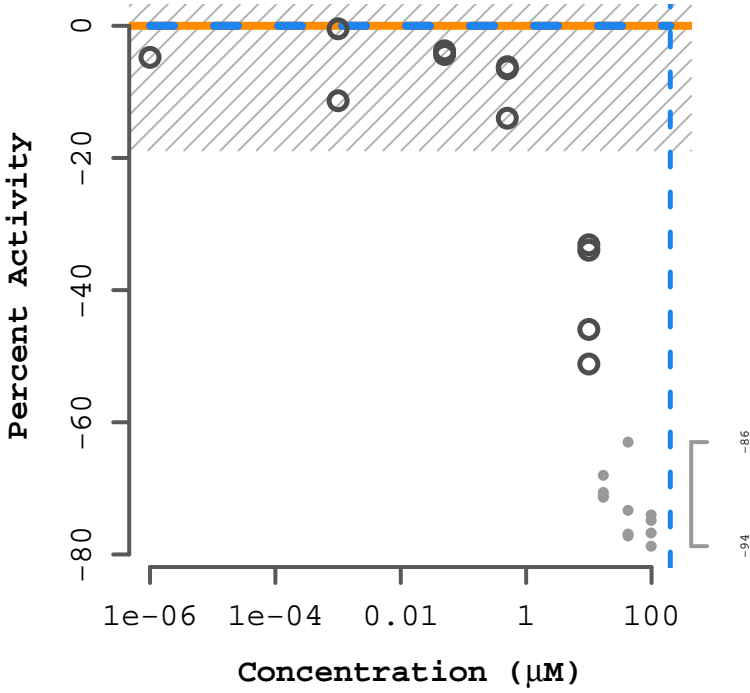

ASSAY: AEID3097 (CCTE\_Deisenroth\_DEVTOX\_RUES2-GLR\_Cel.

NAME: 1-(p-Chlorobenzoyl)-5-methoxy-2-methyl-Indole-

CHID: 20740 CASRN: 53-86-1

SPID(S): ES211\_38\_38

M4ID: 42676114 BRK

HILL MODEL (in red):

|      | tp     | ga   | gw   |
|------|--------|------|------|
| val: | 0.0031 | 2.79 | 6.83 |
| sd:  | NaN    | NaN  | NaN  |

GAIN-LOSS MODEL (in blue):

|      | tp       | ga  | gw   | la   | lw    |
|------|----------|-----|------|------|-------|
| val: | 2.63e-07 | 2.3 | 7.02 | 2.69 | 0.444 |
| sd:  | NaN      | NaN | NaN  | NaN  | NaN   |

|       | CNST   | HILL   | GNLS   |
|-------|--------|--------|--------|
| AIC:  | 393.92 | 399.92 | 403.92 |
| PROB: | 0.95   | 0.05   | 0.01   |
| RMSE: | 54.85  | 54.85  | 54.85  |

MAX\_MEAN: 7.75 MAX\_MED: 8.22 BMAD: 6.29

COFF: 18.9 HIT-CALL: 0 FITC: 7 ACTP: 0.05

FLAGS: 10

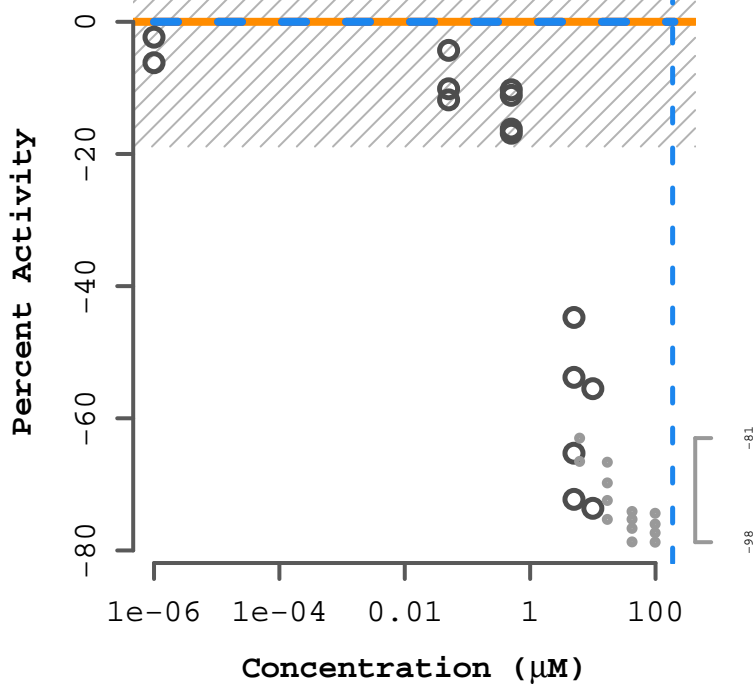

ASSAY: AEID3097 (CCTE\_Deisenroth\_DEVTOX\_RUES2-GLR\_Cel.

NAME: Lovastatin

CHID: 20784 CASRN: 75330-75-5

SPID(S): ES211\_42\_42

M4ID: 426761

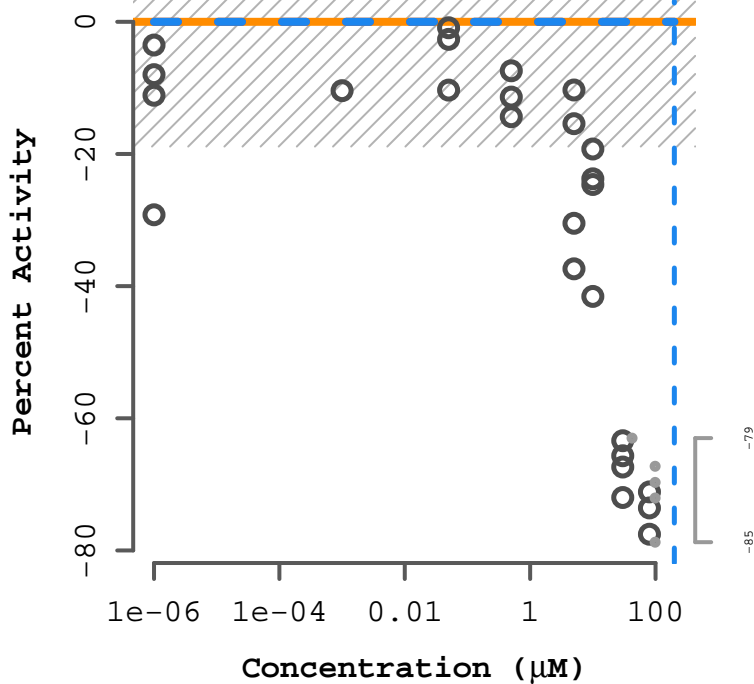

ASSAY: AEID3097 (CCTE\_Deisenroth\_DEVTOX\_RUES2-GLR\_Cel.

NAME: Busulfan

CHID: 20910 CASRN: 55-98-1

SPID(S): ES211\_18\_18

M4ID: 42676142 BRK

HILL MODEL (in red):

|      | tp       | ga   | gw   |
|------|----------|------|------|
| val: | 0.000557 | 2.77 | 6.36 |
| sd:  | NaN      | NaN  | NaN  |

GAIN-LOSS MODEL (in blue):

|      | tp       | ga  | gw   | la   | lw   |
|------|----------|-----|------|------|------|
| val: | 4.39e-08 | 2.3 | 6.92 | 4.24 | 4.77 |
| sd:  | NA       | NA  | NA   | NA   | NA   |

|       | CNST   | HILL   | GNLS   |
|-------|--------|--------|--------|
| AIC:  | 382.06 | 388.06 | 392.06 |
| PROB: | 0.95   | 0.05   | 0.01   |
| RMSE: | 46.1   | 46.1   | 46.1   |

MAX\_MEAN: 5.76 MAX\_MED: 7.6 BMAD: 6.29

COFF: 18.9 HIT-CALL: 0 FITC: 7 ACTP: 0.05

FLAGS: 10



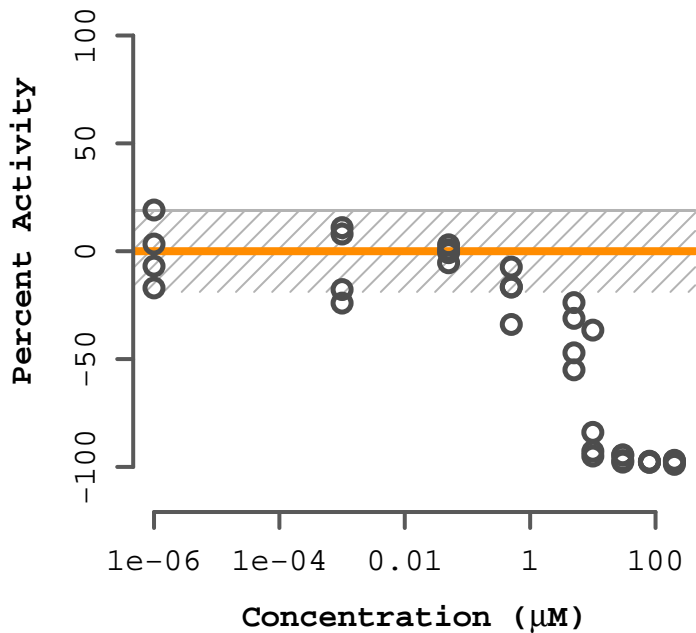

ASSAY: AEID3097 (CCTE\_Deisenroth\_DEVTOX\_RUES2-GLR\_Cel.

NAME: all-trans-Retinoic acid

CHID: 21239 CASRN: 302-79-4

SPID(S): ES211\_13\_13

M4ID: 42676110

HILL MODEL: Failed to converge.

GAIN-LOSS MODEL: Failed to converge.

|       |       |      |      |
|-------|-------|------|------|
|       | CNST  | HILL | GNLS |
| AIC:  | 408   | NA   | NA   |
| PROB: | 1     | NA   | NA   |
| RMSE: | 64.44 | NA   | NA   |

MAX\_MEAN: -0.355 MAX\_MED: -0.00578 BMAD: 6.29

COFF: 18.9 HIT-CALL: 0 FITC: 7 ACTP: 0

FLAGS: 10

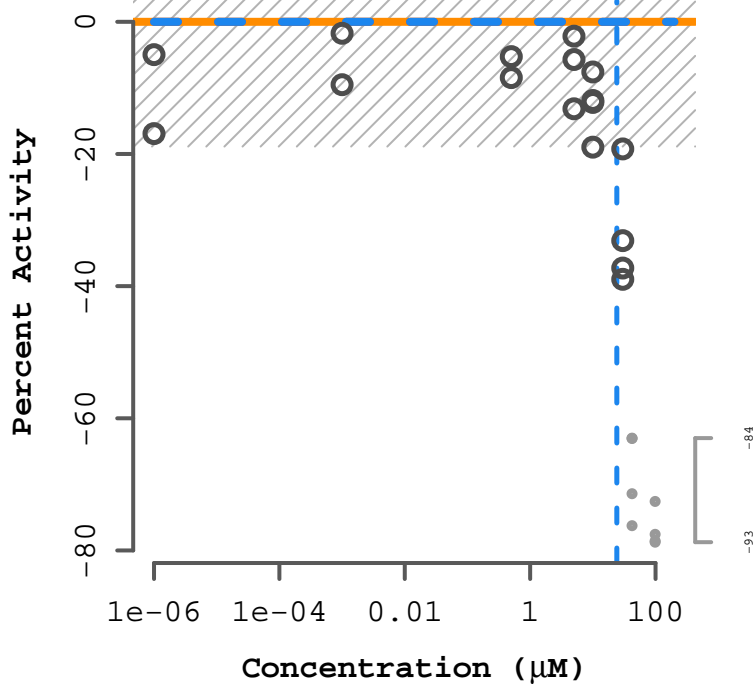

ASSAY: AEID3097 (CCTE\_Deisenroth\_DEVTOX\_RUES2-GLR\_Cel.

NAME: Rifampicin

CHID: 21244 CASRN: 13292-46-1

SPID(S): ES211\_52\_52

M4ID: 42676167 BRK

HILL MODEL (in red):

|      | tp       | ga   | gw   |
|------|----------|------|------|
| val: | 7.13e-06 | 2.79 | 4.41 |
| sd:  | NaN      | NaN  | NaN  |

GAIN-LOSS MODEL (in blue):

|      | tp       | ga   | gw   | la   | lw   |
|------|----------|------|------|------|------|
| val: | 1.82e-09 | 1.38 | 4.67 | 1.88 | 10.2 |
| sd:  | NaN      | NaN  | NaN  | NaN  | NaN  |

|       | CNST   | HILL   | GNLS   |
|-------|--------|--------|--------|
| AIC:  | 372.07 | 378.07 | 382.07 |
| PROB: | 0.95   | 0.05   | 0.01   |
| RMSE: | 44.16  | 44.16  | 44.16  |

MAX\_MEAN: 7.56 MAX\_MED: 5.58 BMAD: 6.29

COFF: 18.9 HIT-CALL: 0 FITC: 7 ACTP: 0.05

FLAGS: 10

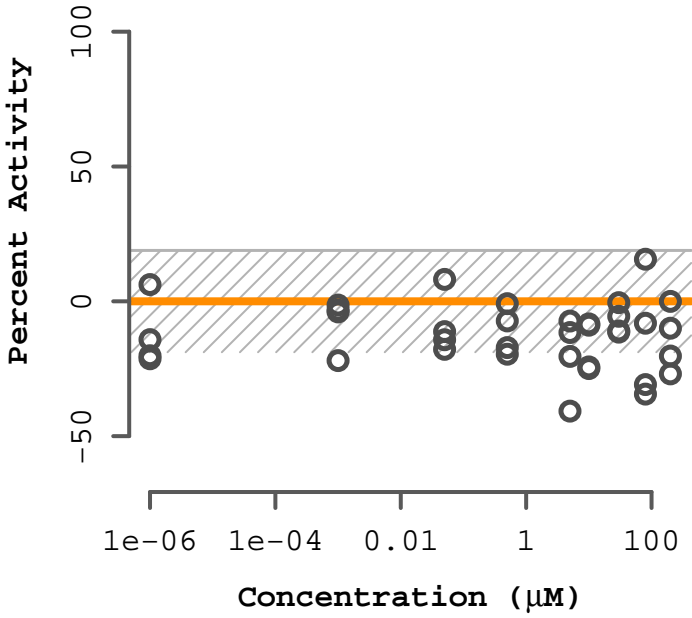

ASSAY: AEID3097 (CCTE\_Deisenroth\_DEVTOX\_RUES2-GLR\_Cel.

NAME: Thalidomide  
CHID: 22524 CASRN: 50-35-1  
SPID(S): ES211\_62\_62  
M4ID: 42676115

HILL MODEL: Failed to converge.

GAIN-LOSS MODEL: Failed to converge.

|       |        |      |      |
|-------|--------|------|------|
|       | CNST   | HILL | GNLS |
| AIC:  | 312.26 | NA   | NA   |
| PROB: | 1      | NA   | NA   |
| RMSE: | 17.19  | NA   | NA   |

MAX\_MEAN: -7.11 MAX\_MED: -3.59 BMAD: 6.29

COFF: 18.9 HIT-CALL: 0 FITC: 7 ACTP: 0

FLAGS:

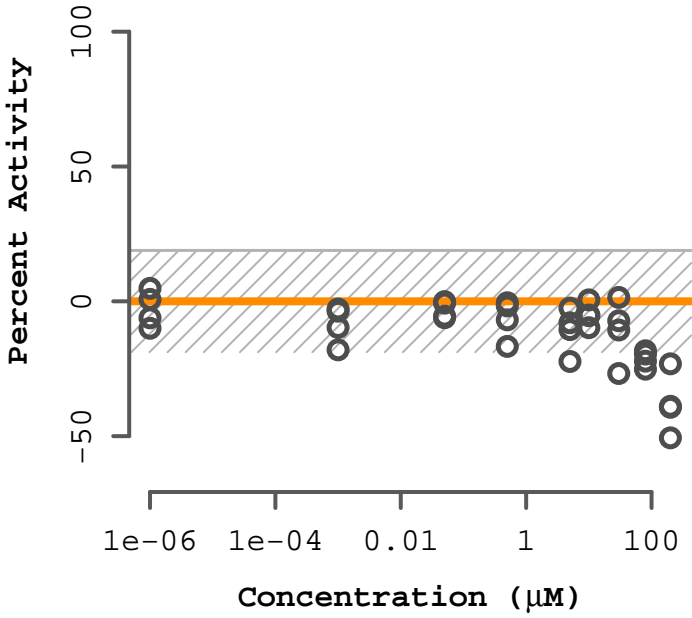

ASSAY: AEID3097 (CCTE\_Deisenroth\_DEVTOX\_RUES2-GLR\_Cel.

NAME: Carbamazepine  
CHID: 22731 CASRN: 298-46-4  
SPID(S): ES211\_21\_21  
M4ID: 42676145

HILL MODEL: Failed to converge.

GAIN-LOSS MODEL: Failed to converge.

|       |        |      |      |
|-------|--------|------|------|
|       | CNST   | HILL | GNLS |
| AIC:  | 306.42 | NA   | NA   |
| PROB: | 1      | NA   | NA   |
| RMSE: | 17.24  | NA   | NA   |

MAX\_MEAN: -2.64 MAX\_MED: -2.69 BMAD: 6.29

COFF: 18.9 HIT-CALL: 0 FITC: 7 ACTP: 0

FLAGS:

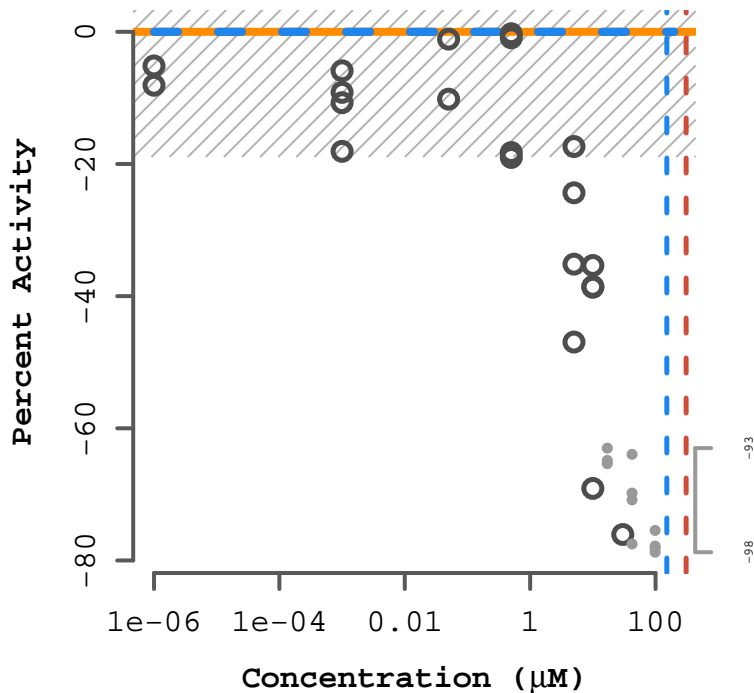

ASSAY: AEID3097 (CCTE\_Deisenroth\_DEVTOX\_RUES2-GLR\_Cel.

NAME: 13-cis Retinoic acid

CHID: 23177 CASRN: 4759-48-2

SPID(S): ES211\_2\_2

M4ID: 42676120 BRK

HILL MODEL (in red):

|      | tp      | ga   | gw   |
|------|---------|------|------|
| val: | 1.5e-07 | 2.49 | 1.51 |
| sd:  | NaN     | NaN  | NaN  |

GAIN-LOSS MODEL (in blue):

|      | tp       | ga   | gw   | la  | lw   |
|------|----------|------|------|-----|------|
| val: | 1.84e-08 | 2.18 | 1.75 | 2.7 | 5.95 |
| sd:  | NaN      | NaN  | NaN  | NaN | NaN  |

|       | CNST   | HILL   | GNLS   |
|-------|--------|--------|--------|
| AIC:  | 399.18 | 405.18 | 409.18 |
| PROB: | 0.95   | 0.05   | 0.01   |
| RMSE: | 58.18  | 58.18  | 58.18  |

MAX\_MEAN: 3.97 MAX\_MED: 2.18 BMAD: 6.29

COFF: 18.9 HIT-CALL: 0 FITC: 7 ACTP: 0.05

FLAGS: 10

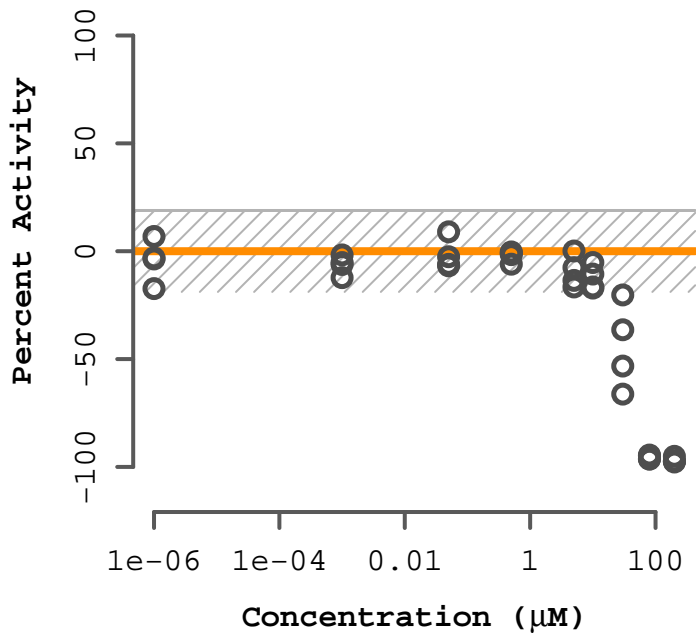

ASSAY: AEID3097 (CCTE\_Deisenroth\_DEVTOX\_RUES2-GLR\_Cel.

NAME: Retinol

CHID: 23556 CASRN: 68-26-8

SPID(S): ES211\_51\_51

M4ID: 42676148

HILL MODEL: Failed to converge.

GAIN-LOSS MODEL: Failed to converge.

|       |        |      |      |
|-------|--------|------|------|
|       | CNST   | HILL | GNLS |
| AIC:  | 379.94 | NA   | NA   |
| PROB: | 1      | NA   | NA   |
| RMSE: | 48.58  | NA   | NA   |

|           |       |          |      |       |      |
|-----------|-------|----------|------|-------|------|
| MAX_MEAN: | -1.59 | MAX_MED: | -1.2 | BMAD: | 6.29 |
|-----------|-------|----------|------|-------|------|

|       |      |           |   |       |   |       |   |
|-------|------|-----------|---|-------|---|-------|---|
| COFF: | 18.9 | HIT-CALL: | 0 | FITC: | 7 | ACTP: | 0 |
|-------|------|-----------|---|-------|---|-------|---|

FLAGS: 10

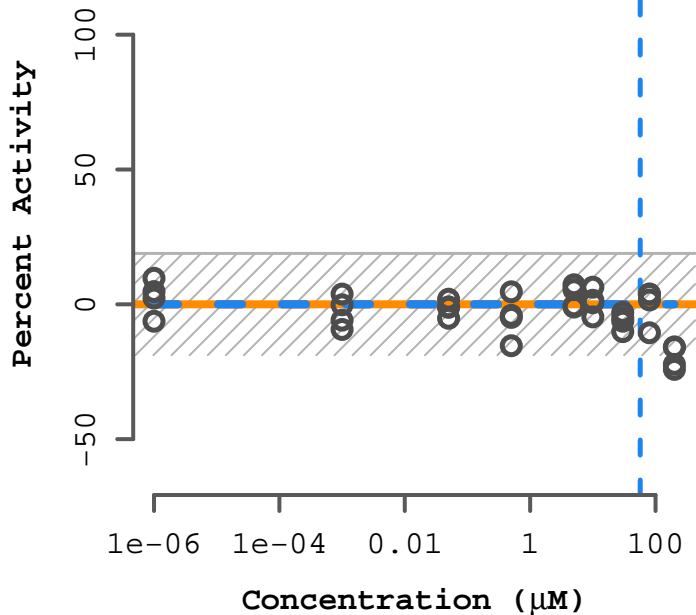

ASSAY: AEID3097 (CCTE\_Deisenroth\_DEVTOX\_RUES2-GLR\_Cel.

NAME: Warfarin

CHID: 23742 CASRN: 81-81-2

SPID(S): ES211\_65\_65

M4ID: 42676132

HILL MODEL (in red):

|      | tp     | ga   | gw   |
|------|--------|------|------|
| val: | 0.0557 | 2.79 | 7.99 |
| sd:  | NaN    | NaN  | NaN  |

GAIN-LOSS MODEL (in blue):

|      | tp       | ga   | gw   | la   | lw   |
|------|----------|------|------|------|------|
| val: | 8.68e-10 | 1.76 | 5.08 | 2.14 | 3.41 |
| sd:  | NaN      | NaN  | NaN  | NaN  | NaN  |

|       | CNST   | HILL   | GNLS   |
|-------|--------|--------|--------|
| AIC:  | 256.96 | 262.96 | 266.96 |
| PROB: | 0.95   | 0.05   | 0.01   |
| RMSE: | 8.62   | 8.62   | 8.62   |

MAX\_MEAN: 2.79 MAX\_MED: 3.54 BMAD: 6.29

COFF: 18.9 HIT-CALL: 0 FITC: 7 ACTP: 0.05

FLAGS:





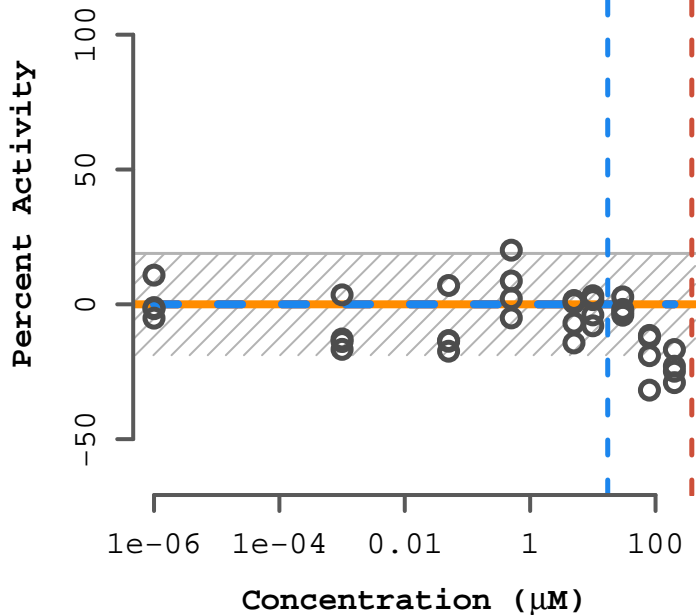

ASSAY: AEID3097 (CCTE\_Deisenroth\_DEVTOX\_RUES2-GLR\_Cel.

NAME: Stavudine

CHID: 23819 CASRN: 3056-17-5

SPID(S): ES211\_58\_58

M4ID: 42676137

HILL MODEL (in red):

|               |      |      |
|---------------|------|------|
| tp            | ga   | gw   |
| val: 7.22e-07 | 2.58 | 7.69 |
| sd: NaN       | NaN  | NaN  |

GAIN-LOSS MODEL (in blue):

|            |      |     |     |      |
|------------|------|-----|-----|------|
| tp         | ga   | gw  | la  | lw   |
| val: 4e-09 | 1.24 | 8   | 1.5 | 3.46 |
| sd: NaN    | NaN  | NaN | NaN | NaN  |

|       |        |        |        |
|-------|--------|--------|--------|
|       | CNST   | HILL   | GNLS   |
| AIC:  | 291.98 | 297.98 | 301.98 |
| PROB: | 0.95   | 0.05   | 0.01   |
| RMSE: | 13.25  | 13.25  | 13.25  |

MAX\_MEAN: 6.46 MAX\_MED: 5.39 BMAD: 6.29

COFF: 18.9 HIT-CALL: 0 FITC: 7 ACTP: 0.05

FLAGS:

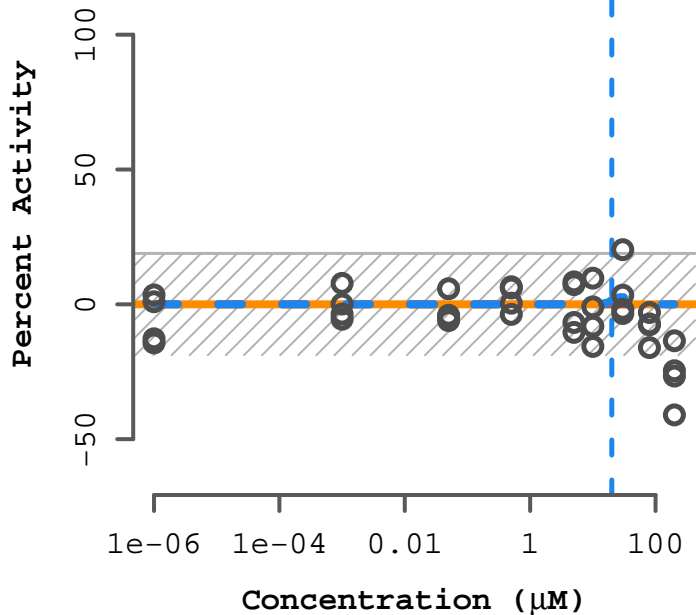

ASSAY: AEID3097 (CCTE\_Deisenroth\_DEVTOX\_RUES2-GLR\_Cel.

NAME: Cyclophosphamide monohydrate

CHID: 24888 CASRN: 6055-19-2

SPID(S): ES211\_24\_24

M4ID: 42676140

HILL MODEL (in red):

|      | tp       | ga   | gw   |
|------|----------|------|------|
| val: | 3.74e-08 | 2.74 | 4.17 |
| sd:  | NaN      | NaN  | NaN  |

GAIN-LOSS MODEL (in blue):

|      | tp   | ga   | gw   | la   | lw   |
|------|------|------|------|------|------|
| val: | 2.88 | 1.3  | 8    | 1.55 | 16.9 |
| sd:  | 21   | 2.23 | 56.4 | 3.33 | 585  |

|       | CNST   | HILL   | GNLS   |
|-------|--------|--------|--------|
| AIC:  | 280.31 | 286.31 | 290.02 |
| PROB: | 0.95   | 0.05   | 0.01   |
| RMSE: | 12.2   | 12.2   | 12.12  |

MAX\_MEAN: 4.61 MAX\_MED: 3.25 BMAD: 6.29

COFF: 18.9 HIT-CALL: 0 FITC: 7 ACTP: 0.05

FLAGS:

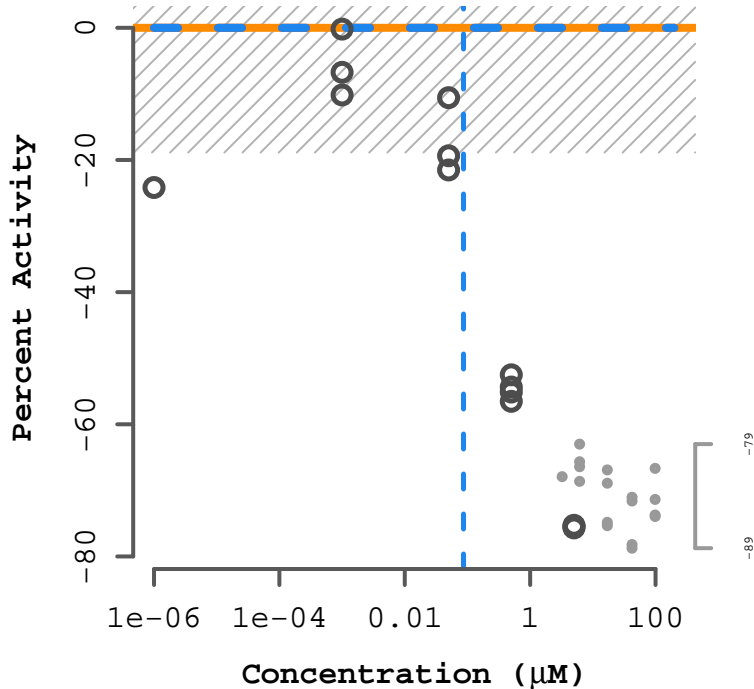

ASSAY: AEID3097 (CCTE\_Deisenroth\_DEVTOX\_RUES2-GLR\_Cel.

NAME: Cytarabine hydrochloride

CHID: 24891 CASRN: 69-74-9

SPID(S): ES211\_25\_25

M4ID: 42676157 BRK

HILL MODEL (in red):

|      | tp       | ga   | gw  |
|------|----------|------|-----|
| val: | 2.35e-06 | 2.78 | 4   |
| sd:  | NaN      | NaN  | NaN |

GAIN-LOSS MODEL (in blue):

|      | tp       | ga    | gw   | la     | lw   |
|------|----------|-------|------|--------|------|
| val: | 1.22e-06 | -1.06 | 5.75 | -0.706 | 6.24 |
| sd:  | NaN      | NaN   | NaN  | NaN    | NaN  |

|       | CNST   | HILL   | GNLS   |
|-------|--------|--------|--------|
| AIC:  | 410.86 | 416.86 | 420.86 |
| PROB: | 0.95   | 0.05   | 0.01   |
| RMSE: | 64.86  | 64.86  | 64.86  |

MAX\_MEAN: 0.428 MAX\_MED: 3.03 BMAD: 6.29

COFF: 18.9 HIT-CALL: 0 FITC: 7 ACTP: 0.05

FLAGS: 10

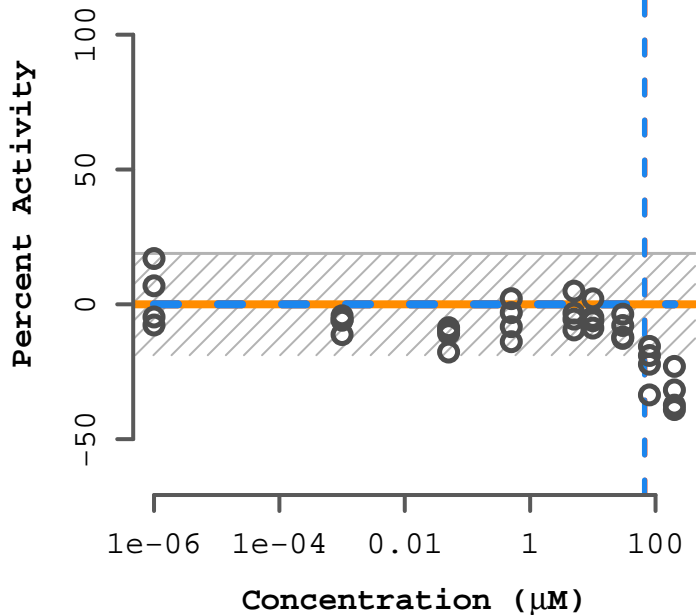

ASSAY: AEID3097 (CCTE\_Deisenroth\_DEVTOX\_RUES2-GLR\_Cel.

NAME: Hydroxyurea

CHID: 25438 CASRN: 127-07-1

SPID(S): ES211\_35\_35

M4ID: 42676139

HILL MODEL (in red):

|      | tp       | ga   | gw    |
|------|----------|------|-------|
| val: | 1.15e-09 | 1.83 | 0.72  |
| sd:  | 4.62e-05 | 4810 | 47300 |

GAIN-LOSS MODEL (in blue):

|      | tp       | ga   | gw  | la   | lw   |
|------|----------|------|-----|------|------|
| val: | 1.12e-08 | 1.82 | 1.7 | 2.16 | 5.41 |
| sd:  | NaN      | NaN  | NaN | NaN  | NaN  |

|       | CNST   | HILL   | GNLS   |
|-------|--------|--------|--------|
| AIC:  | 301.96 | 307.96 | 311.96 |
| PROB: | 0.95   | 0.05   | 0.01   |
| RMSE: | 15.68  | 15.68  | 15.68  |

MAX\_MEAN: 2.88 MAX\_MED: 1.1 BMAD: 6.29

COFF: 18.9 HIT-CALL: 0 FITC: 7 ACTP: 0.05

FLAGS:

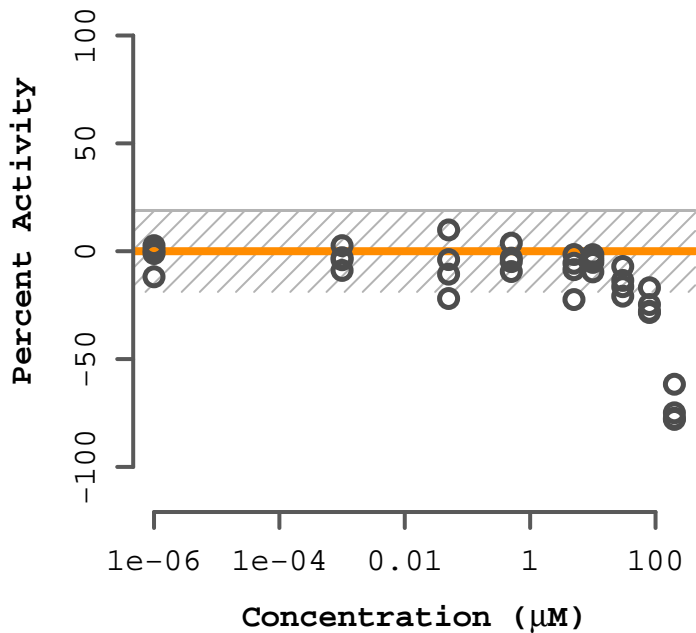

ASSAY: AEID3097 (CCTE\_Deisenroth\_DEVTOX\_RUES2-GLR\_Cel.

NAME: MEHP

CHID: 25680 CASRN: 4376-20-9

SPID(S): ES211\_44\_44

M4ID: 42676173

HILL MODEL: Failed to converge.

GAIN-LOSS MODEL: Failed to converge.

|       |        |      |      |
|-------|--------|------|------|
|       | CNST   | HILL | GNLS |
| AIC:  | 329.82 | NA   | NA   |
| PROB: | 1      | NA   | NA   |
| RMSE: | 27.25  | NA   | NA   |

MAX\_MEAN: -2.45 MAX\_MED: -0.279 BMAD: 6.29

COFF: 18.9 HIT-CALL: 0 FITC: 7 ACTP: 0

FLAGS: 10

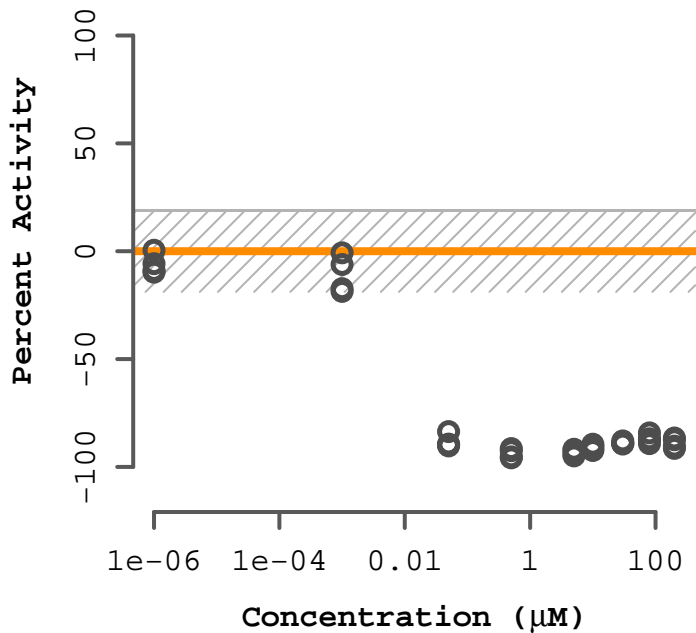

ASSAY: AEID3097 (CCTE\_Deisenroth\_DEVTOX\_RUES2-GLR\_Cel.

NAME: Adriamycin hydrochloride

CHID: 30636 CASRN: 25316-40-9

SPID(S): ES211\_67\_67

M4ID: 42676163

HILL MODEL: Failed to converge.

GAIN-LOSS MODEL: Failed to converge.

|       |        |      |      |
|-------|--------|------|------|
|       | CNST   | HILL | GNLS |
| AIC:  | 490.14 | NA   | NA   |
| PROB: | 1      | NA   | NA   |
| RMSE: | 79.67  | NA   | NA   |

MAX\_MEAN: -5.98 MAX\_MED: -7.33 BMAD: 6.29

COFF: 18.9 HIT-CALL: 0 FITC: 7 ACTP: 0

FLAGS: 10

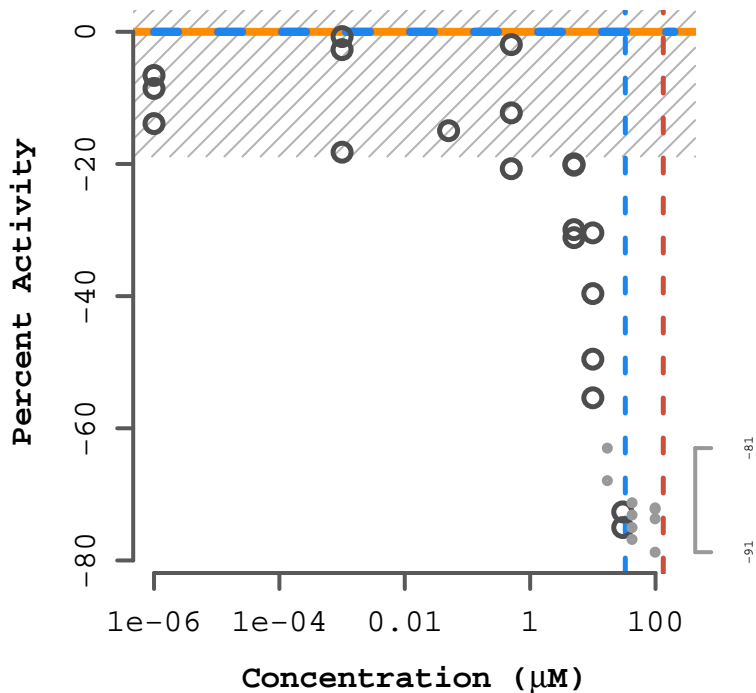

ASSAY: AEID3097 (CCTE\_Deisenroth\_DEVTOX\_RUES2-GLR\_Cel.

NAME: 5-Bromo-2'-deoxyuridine

CHID: 33105 CASRN: 59-14-3

SPID(S): ES211\_4\_4

M4ID: 42676149 BRK

HILL MODEL (in red):

|      | tp       | ga   | gw   |
|------|----------|------|------|
| val: | 3.51e-09 | 2.12 | 2.52 |
| sd:  | NaN      | NaN  | NaN  |

GAIN-LOSS MODEL (in blue):

|      | tp       | ga   | gw    | la   | lw     |
|------|----------|------|-------|------|--------|
| val: | 1.61e-07 | 1.52 | 4.96  | 1.79 | 17.1   |
| sd:  | 0.00174  | 637  | 68400 | 2950 | 441000 |

|       | CNST   | HILL   | GNLS   |
|-------|--------|--------|--------|
| AIC:  | 391.52 | 397.52 | 401.52 |
| PROB: | 0.95   | 0.05   | 0.01   |
| RMSE: | 52.26  | 52.26  | 52.26  |

MAX\_MEAN: 1.28 MAX\_MED: 2.62 BMAD: 6.29

COFF: 18.9 HIT-CALL: 0 FITC: 7 ACTP: 0.05

FLAGS: 10

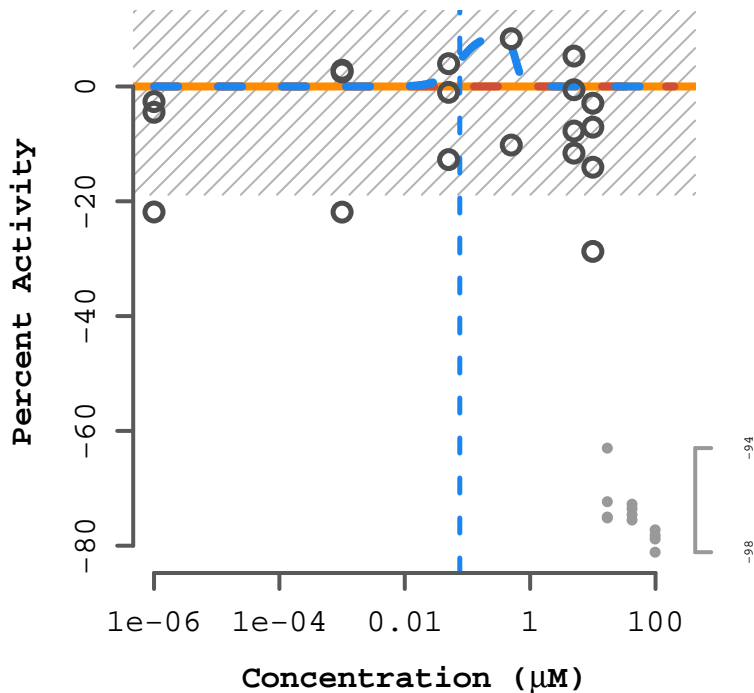

ASSAY: AEID3097 (CCTE\_Deisenroth\_DEVTOX\_RUES2-GLR\_Cel.

NAME: Amiodarone hydrochloride

CHID: 37185 CASRN: 19774-82-4

SPID(S): ES211\_14\_14

M4ID: 42676131 BRK

HILL MODEL (in red):

|      | tp    | ga  | gw   |
|------|-------|-----|------|
| val: | 0.155 | 2.8 | 7.85 |
| sd:  | NaN   | NaN | NaN  |

GAIN-LOSS MODEL (in blue):

|      | tp   | ga    | gw  | la     | lw   |
|------|------|-------|-----|--------|------|
| val: | 9.07 | -1.12 | 2.5 | -0.228 | 7.46 |
| sd:  | NaN  | NaN   | NaN | NaN    | NaN  |

|       | CNST  | HILL  | GNLS   |
|-------|-------|-------|--------|
| AIC:  | 394.9 | 400.9 | 404.76 |
| PROB: | 0.95  | 0.05  | 0.01   |
| RMSE: | 56.63 | 56.63 | 56.58  |

MAX\_MEAN: 6.91 MAX\_MED: 9.03 BMAD: 6.29

COFF: 18.9 HIT-CALL: 0 FITC: 7 ACTP: 0.05

FLAGS: 10



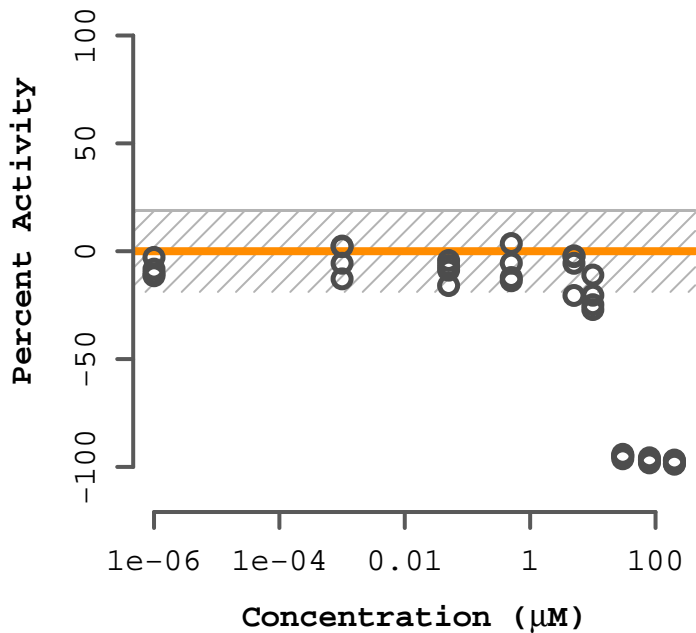

ASSAY: AEID3097 (CCTE\_Deisenroth\_DEVTOX\_RUES2-GLR\_Cel.

NAME: Imatinib mesylate

CHID: 40502 CASRN: 220127-57-1

SPID(S): ES211\_37\_37

M4ID: 42676108

HILL MODEL: Failed to converge.

GAIN-LOSS MODEL: Failed to converge.

|       |        |      |      |
|-------|--------|------|------|
|       | CNST   | HILL | GNLS |
| AIC:  | 394.76 | NA   | NA   |
| PROB: | 1      | NA   | NA   |
| RMSE: | 56.66  | NA   | NA   |

MAX\_MEAN: -3.45 MAX\_MED: -1.7 BMAD: 6.29

COFF: 18.9 HIT-CALL: 0 FITC: 7 ACTP: 0

FLAGS: 10

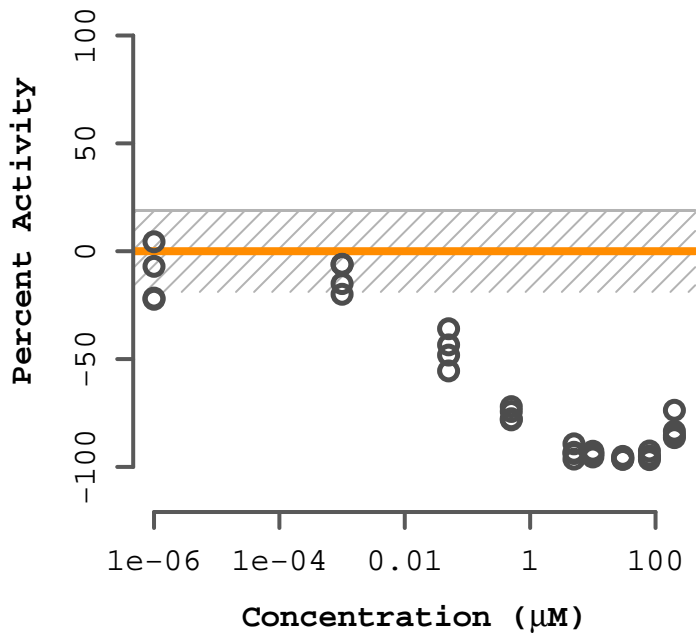

ASSAY: AEID3097 (CCTE\_Deisenroth\_DEVTOX\_RUES2-GLR\_Cel.

NAME: Dasatinib

CHID: 40979 CASRN: 302962-49-8

SPID(S): ES211\_26\_26

M4ID: 42676118

HILL MODEL: Failed to converge.

GAIN-LOSS MODEL: Failed to converge.

|       |        |      |      |
|-------|--------|------|------|
|       | CNST   | HILL | GNLS |
| AIC:  | 422.07 | NA   | NA   |
| PROB: | 1      | NA   | NA   |
| RMSE: | 75.12  | NA   | NA   |

MAX\_MEAN: -11.6 MAX\_MED: -10.6 BMAD: 6.29

COFF: 18.9 HIT-CALL: 0 FITC: 7 ACTP: 0

FLAGS: 10

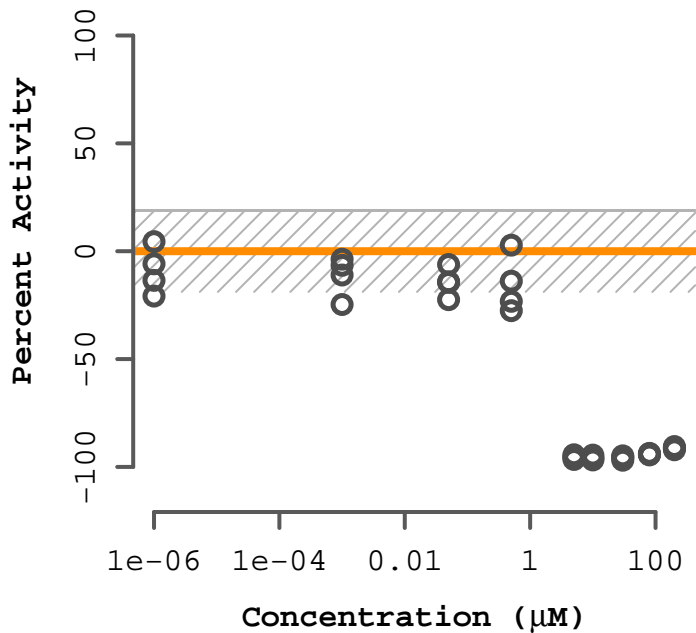

ASSAY: AEID3097 (CCTE\_Deisenroth\_DEVTOX\_RUES2-GLR\_Cel.

NAME: Sorafenib

CHID: 41128 CASRN: 284461-73-0

SPID(S): ES211\_57\_57

M4ID: 42676127

HILL MODEL: Failed to converge.

GAIN-LOSS MODEL: Failed to converge.

|       |        |      |      |
|-------|--------|------|------|
|       | CNST   | HILL | GNLS |
| AIC:  | 416.98 | NA   | NA   |
| PROB: | 1      | NA   | NA   |
| RMSE: | 71.16  | NA   | NA   |

MAX\_MEAN: -8.91 MAX\_MED: -8.77 BMAD: 6.29

COFF: 18.9 HIT-CALL: 0 FITC: 7 ACTP: 0

FLAGS: 10

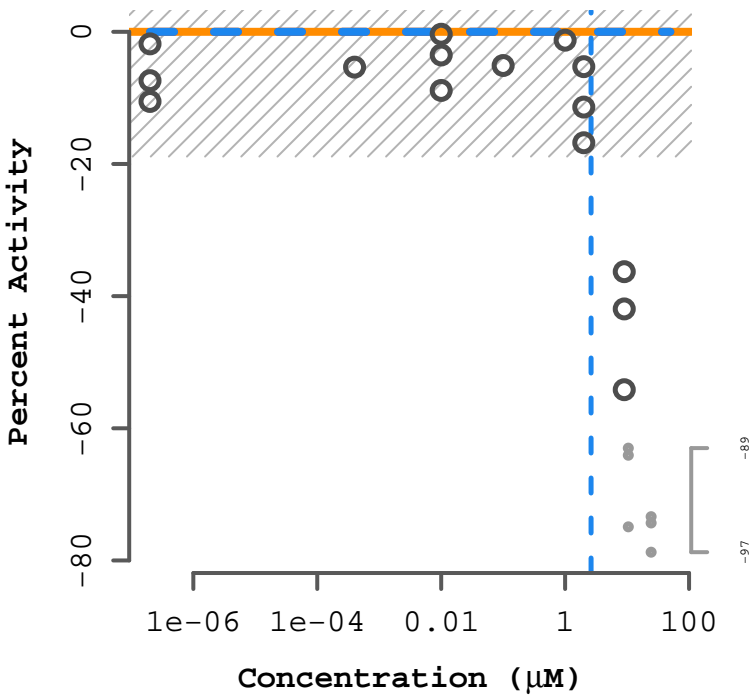

ASSAY: AEID3097 (CCTE\_Deisenroth\_DEVTOX\_RUES2-GLR\_Cel.

NAME: Ritanserin  
CHID: 42594 CASRN: 87051-43-2  
SPID(S): ES211\_53\_53  
M4ID: 42676124 BRK

HILL MODEL (in red):  
tp ga gw  
val: 6.76e-06 2.17 4.8  
sd: NaN NaN NaN

GAIN-LOSS MODEL (in blue):  
tp ga gw la lw  
val: 2.14e-08 0.419 6.49 0.845 10.5  
sd: NaN NaN NaN NaN NaN

|       | CNST  | HILL  | GNLS  |
|-------|-------|-------|-------|
| AIC:  | 319.9 | 325.9 | 329.9 |
| PROB: | 0.95  | 0.05  | 0.01  |
| RMSE: | 44.13 | 44.13 | 44.13 |

MAX\_MEAN: 9.3 MAX\_MED: 9.13 BMAD: 6.29

COFF: 18.9 HIT-CALL: 0 FITC: 7 ACTP: 0.05

FLAGS: 10

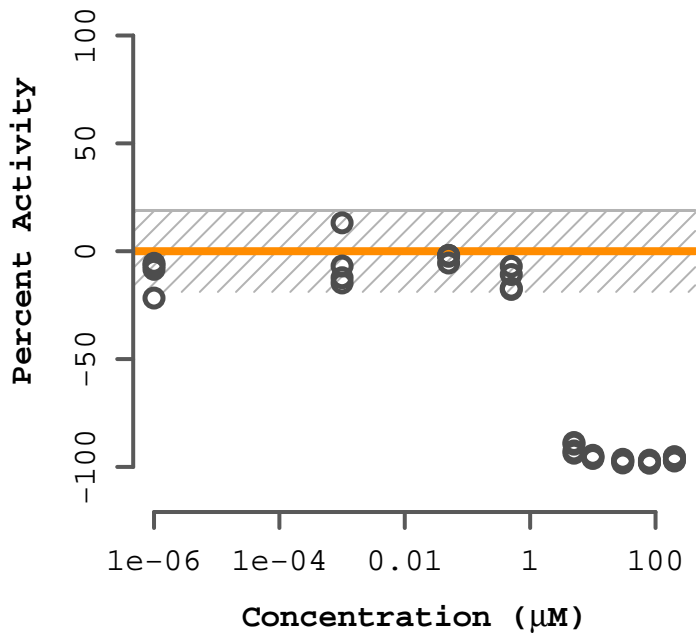

ASSAY: AEID3097 (CCTE\_Deisenroth\_DEVTOX\_RUES2-GLR\_Cel.

NAME: Sunitinib malate

CHID: 46492 CASRN: 341031-54-7

SPID(S): ES211\_60\_60

M4ID: 42676159

HILL MODEL: Failed to converge.

GAIN-LOSS MODEL: Failed to converge.

|       |        |      |      |
|-------|--------|------|------|
|       | CNST   | HILL | GNLS |
| AIC:  | 416.93 | NA   | NA   |
| PROB: | 1      | NA   | NA   |
| RMSE: | 71.6   | NA   | NA   |

MAX\_MEAN: -2.92 MAX\_MED: -2.16 BMAD: 6.29

COFF: 18.9 HIT-CALL: 0 FITC: 7 ACTP: 0

FLAGS: 10

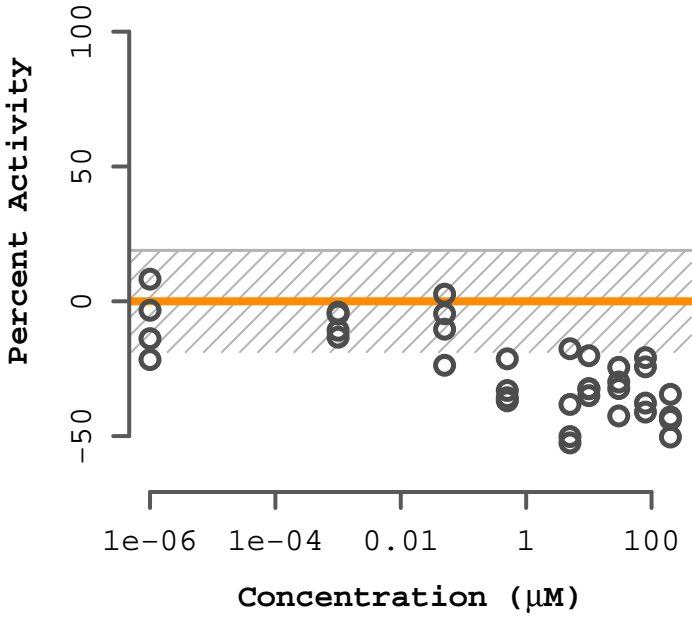

ASSAY: AEID3097 (CCTE\_Deisenroth\_DEVTOX\_RUES2-GLR\_Cel.

NAME: Lenalidomide  
CHID: 46664 CASRN: 191732-72-6  
SPID(S): ES211\_41\_41  
M4ID: 42676154

HILL MODEL: Failed to converge.

GAIN-LOSS MODEL: Failed to converge.

|       |        |      |      |
|-------|--------|------|------|
|       | CNST   | HILL | GNLS |
| AIC:  | 355.18 | NA   | NA   |
| PROB: | 1      | NA   | NA   |
| RMSE: | 30.14  | NA   | NA   |

MAX\_MEAN: -7.64 MAX\_MED: -7.48 BMAD: 6.29

COFF: 18.9 HIT-CALL: 0 FITC: 7 ACTP: 0

FLAGS: 10

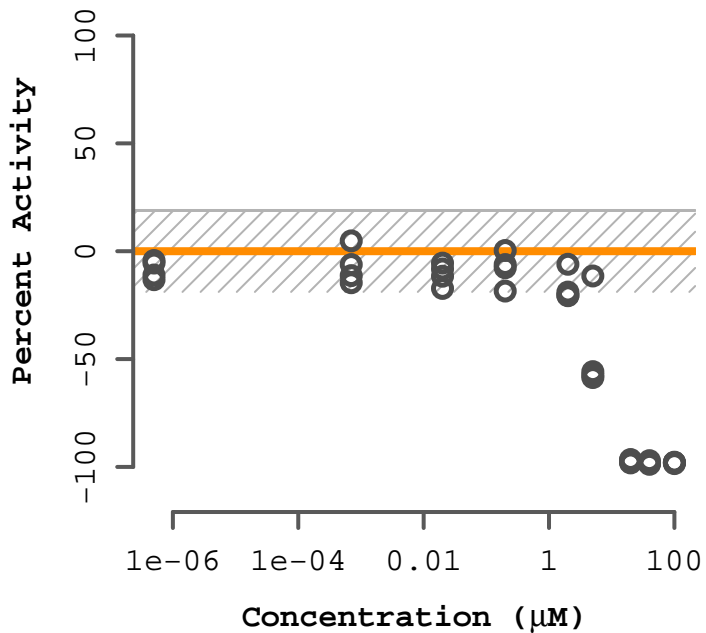

ASSAY: AEID3097 (CCTE\_Deisenroth\_DEVTOX\_RUES2-GLR\_Cel.

NAME: Vandetanib

CHID: 46681 CASRN: 443913-73-3

SPID(S): ES211\_64\_64

M4ID: 42676112

HILL MODEL: Failed to converge.

GAIN-LOSS MODEL: Failed to converge.

|       |        |      |      |
|-------|--------|------|------|
|       | CNST   | HILL | GNLS |
| AIC:  | 400.29 | NA   | NA   |
| PROB: | 1      | NA   | NA   |
| RMSE: | 59.58  | NA   | NA   |

|           |       |          |      |       |      |
|-----------|-------|----------|------|-------|------|
| MAX_MEAN: | -6.81 | MAX_MED: | -6.9 | BMAD: | 6.29 |
|-----------|-------|----------|------|-------|------|

|       |      |           |   |       |   |       |   |
|-------|------|-----------|---|-------|---|-------|---|
| COFF: | 18.9 | HIT-CALL: | 0 | FITC: | 7 | ACTP: | 0 |
|-------|------|-----------|---|-------|---|-------|---|

FLAGS: 10

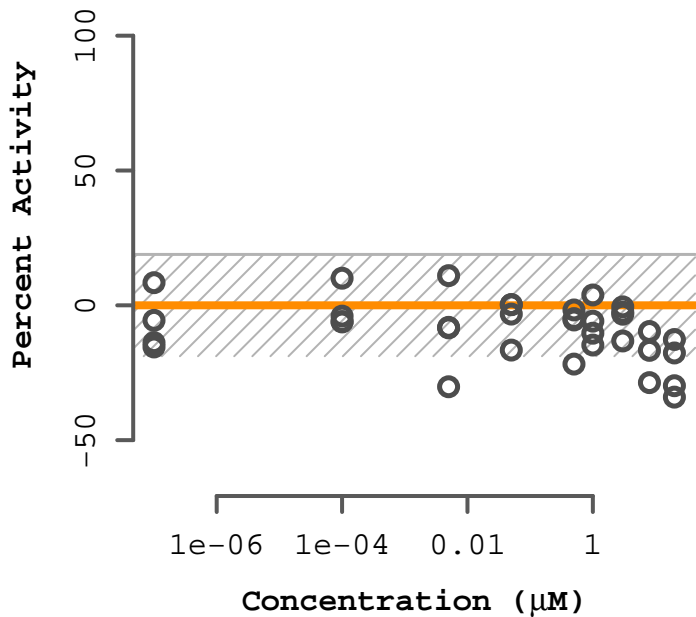

ASSAY: AEID3097 (CCTE\_Deisenroth\_DEVTOX\_RUES2-GLR\_Cel.

NAME: Dexamethasone sodium phosphate

CHID: 47429 CASRN: 2392-39-4

SPID(S): ES211\_28\_28

M4ID: 42676121

HILL MODEL: Failed to converge.

GAIN-LOSS MODEL: Failed to converge.

|       | CNST   | HILL | GNLS |
|-------|--------|------|------|
| AIC:  | 287.46 | NA   | NA   |
| PROB: | 1      | NA   | NA   |
| RMSE: | 14.13  | NA   | NA   |

MAX\_MEAN: -1.52 MAX\_MED: -1.5 BMAD: 6.29

COFF: 18.9 HIT-CALL: 0 FITC: 7 ACTP: 0

FLAGS:



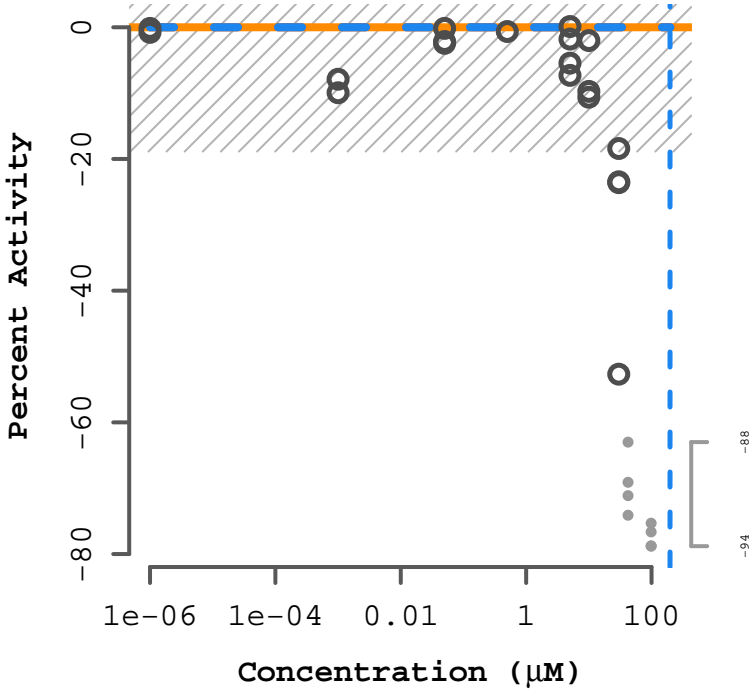

ASSAY: AEID3097 (CCTE\_Deisenroth\_DEVTOX\_RUES2-GLR\_Cel.

NAME: Esomeprazole magnesium hydrate

CHID: 746660 CASRN: 668985-31-7

SPID(S): ES211\_43\_43

M4ID: 42676165 BRK

HILL MODEL (in red):

|      | tp    | ga  | gw   |
|------|-------|-----|------|
| val: | 0.213 | 2.8 | 7.93 |
| sd:  | NaN   | NaN | NaN  |

GAIN-LOSS MODEL (in blue):

|      | tp       | ga  | gw   | la  | lw   |
|------|----------|-----|------|-----|------|
| val: | 7.89e-09 | 2.3 | 7.68 | 4.3 | 9.01 |
| sd:  | NA       | NA  | NA   | NA  | NA   |

|       | CNST   | HILL   | GNLS   |
|-------|--------|--------|--------|
| AIC:  | 373.34 | 379.34 | 383.34 |
| PROB: | 0.95   | 0.05   | 0.01   |
| RMSE: | 45.47  | 45.47  | 45.47  |

MAX\_MEAN: 7.03 MAX\_MED: 6.51 BMAD: 6.29

COFF: 18.9 HIT-CALL: 0 FITC: 7 ACTP: 0.05

FLAGS: 10

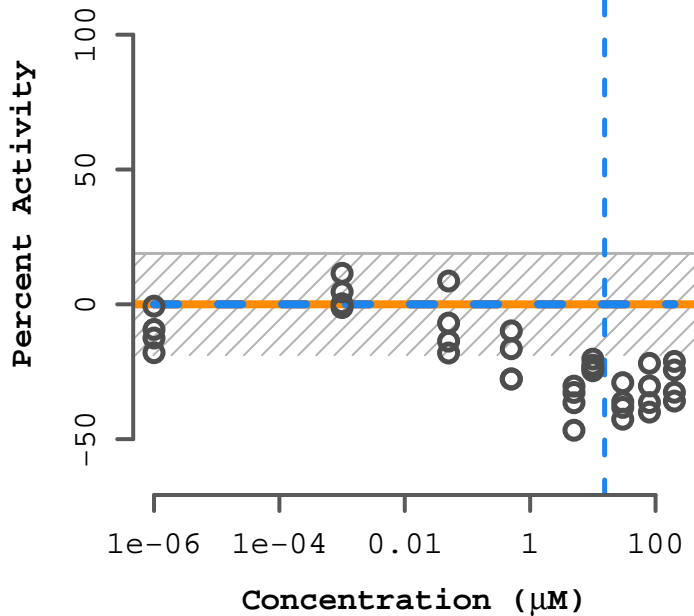

ASSAY: AEID3097 (CCTE\_Deisenroth\_DEVTOX\_RUES2-GLR\_Cel.

NAME: Pomalidomide

CHID: 893458 CASRN: 19171-19-8

SPID(S): ES211\_50\_50

M4ID: 42676155

HILL MODEL (in red):

|      | tp       | ga   | gw   |
|------|----------|------|------|
| val: | 9.84e-09 | 2.67 | 2.57 |
| sd:  | NaN      | NaN  | NaN  |

GAIN-LOSS MODEL (in blue):

|      | tp       | ga   | gw   | la   | lw   |
|------|----------|------|------|------|------|
| val: | 1.86e-08 | 1.19 | 3.76 | 1.49 | 2.63 |
| sd:  | NaN      | NaN  | NaN  | NaN  | NaN  |

|       | CNST   | HILL   | GNLS   |
|-------|--------|--------|--------|
| AIC:  | 343.99 | 349.99 | 353.99 |
| PROB: | 0.95   | 0.05   | 0.01   |
| RMSE: | 25.81  | 25.81  | 25.81  |

MAX\_MEAN: 3.8 MAX\_MED: 2.43 BMAD: 6.29

COFF: 18.9 HIT-CALL: 0 FITC: 7 ACTP: 0.05

FLAGS: 10

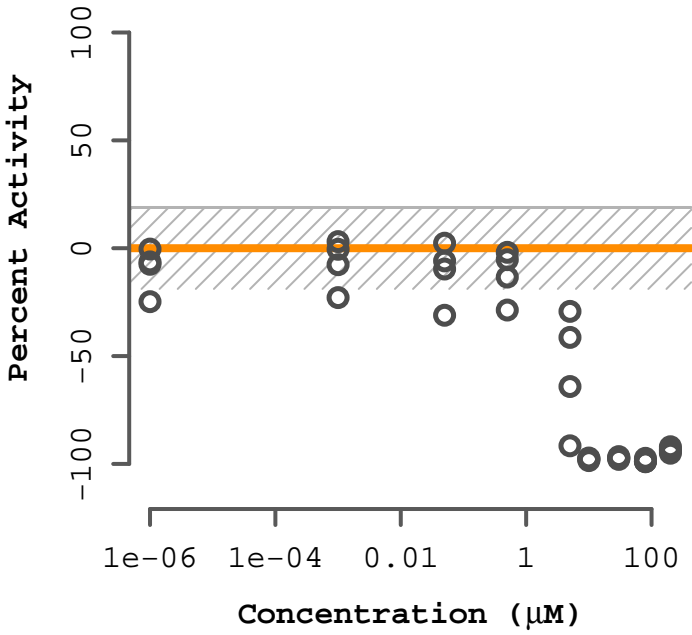

ASSAY: AEID3097 (CCTE\_Deisenroth\_DEVTOX\_RUES2-GLR\_Cel.

NAME: Tegaserod maleate  
CHID: 904761 CASRN: 189188-57-6  
SPID(S): ES211\_61\_61  
M4ID: 42676109

HILL MODEL: Failed to converge.

GAIN-LOSS MODEL: Failed to converge.

|       |        |      |      |
|-------|--------|------|------|
|       | CNST   | HILL | GNLS |
| AIC:  | 413.04 | NA   | NA   |
| PROB: | 1      | NA   | NA   |
| RMSE: | 68.38  | NA   | NA   |

MAX\_MEAN: -6.97      MAX\_MED: -4.05      BMAD: 6.29

COFF: 18.9      HIT-CALL: 0      FITC: 7      ACTP: 0

FLAGS: 10

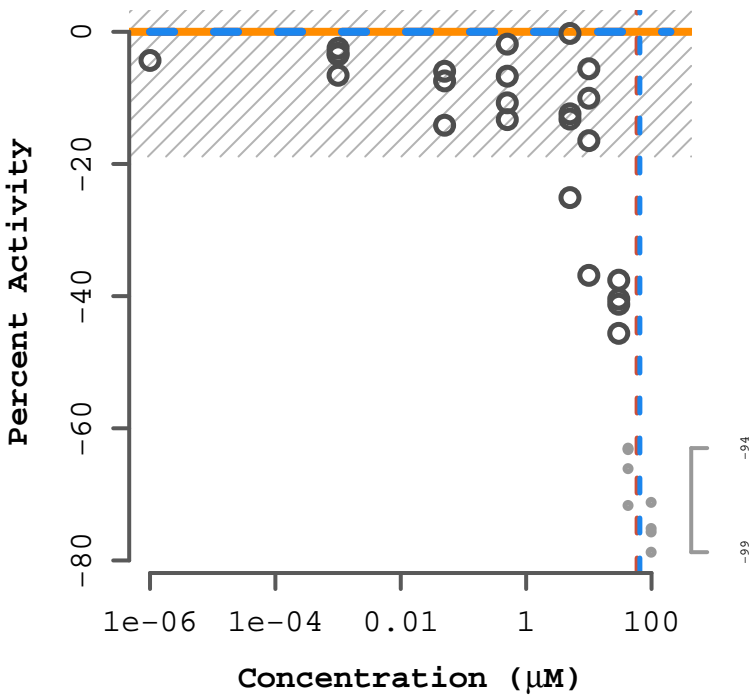

ASSAY: AEID3097 (CCTE\_Deisenroth\_DEVTOX\_RUES2-GLR\_Cel.

NAME: Mianserin hydrochloride  
CHID: 944145 CASRN: 21535-47-7  
SPID(S): ES211\_47\_47  
M4ID: 42676117 BRK

HILL MODEL (in red):

|      | tp       | ga   | gw     |
|------|----------|------|--------|
| val: | 2.23e-08 | 1.77 | 1.49   |
| sd:  | 0.000915 | 1540 | 167000 |

GAIN-LOSS MODEL (in blue):

|      | tp       | ga   | gw   | la   | lw   |
|------|----------|------|------|------|------|
| val: | 1.38e-08 | 1.81 | 1.23 | 2.56 | 5.17 |
| sd:  | NaN      | NaN  | NaN  | NaN  | NaN  |

|       | CNST   | HILL   | GNLS   |
|-------|--------|--------|--------|
| AIC:  | 380.54 | 386.54 | 390.54 |
| PROB: | 0.95   | 0.05   | 0.01   |
| RMSE: | 48.52  | 48.52  | 48.52  |

MAX\_MEAN: 3.09      MAX\_MED: 0.606      BMAD: 6.29

COFF: 18.9      HIT-CALL: 0      FITC: 7      ACTP: 0.05

FLAGS: 10

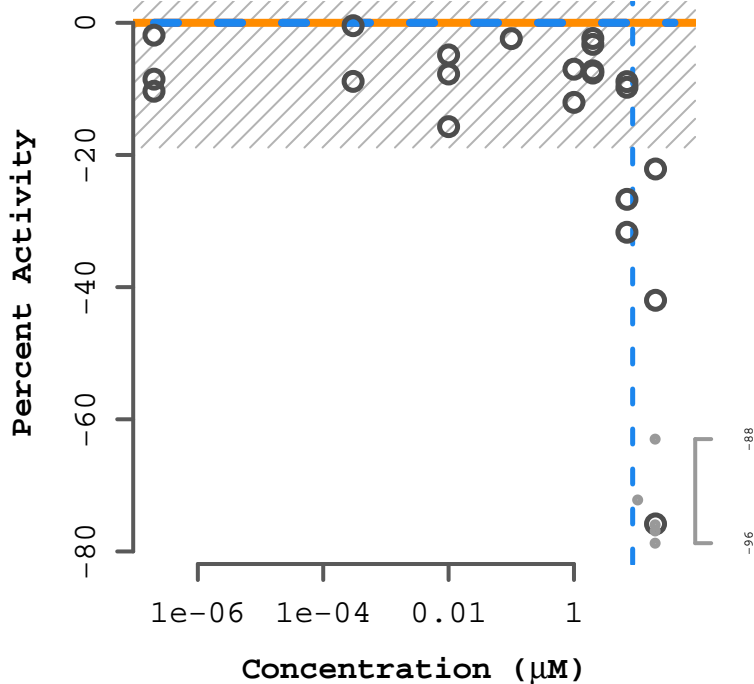

ASSAY: AEID3097 (CCTE\_Deisenroth\_DEVTOX\_RUES2-GLR\_Cel.

NAME: Dorsomorphin

CHID: 1006988 CASRN: 866405-64-3

SPID(S): ES211\_6\_6

M4ID: 42676164 BRK

HILL MODEL (in red):

|      | tp      | ga  | gw   |
|------|---------|-----|------|
| val: | 0.00122 | 2.1 | 7.18 |
| sd:  | NaN     | NaN | NaN  |

GAIN-LOSS MODEL (in blue):

|      | tp       | ga    | gw  | la   | lw   |
|------|----------|-------|-----|------|------|
| val: | 2.85e-08 | 0.936 | 8   | 1.21 | 9.59 |
| sd:  | NaN      | NaN   | NaN | NaN  | NaN  |

|       | CNST   | HILL   | GNLS   |
|-------|--------|--------|--------|
| AIC:  | 356.44 | 362.44 | 366.44 |
| PROB: | 0.95   | 0.05   | 0.01   |
| RMSE: | 39.1   | 39.1   | 39.1   |

MAX\_MEAN: 5.29 MAX\_MED: 4.29 BMAD: 6.29

COFF: 18.9 HIT-CALL: 0 FITC: 7 ACTP: 0.05

FLAGS: 10

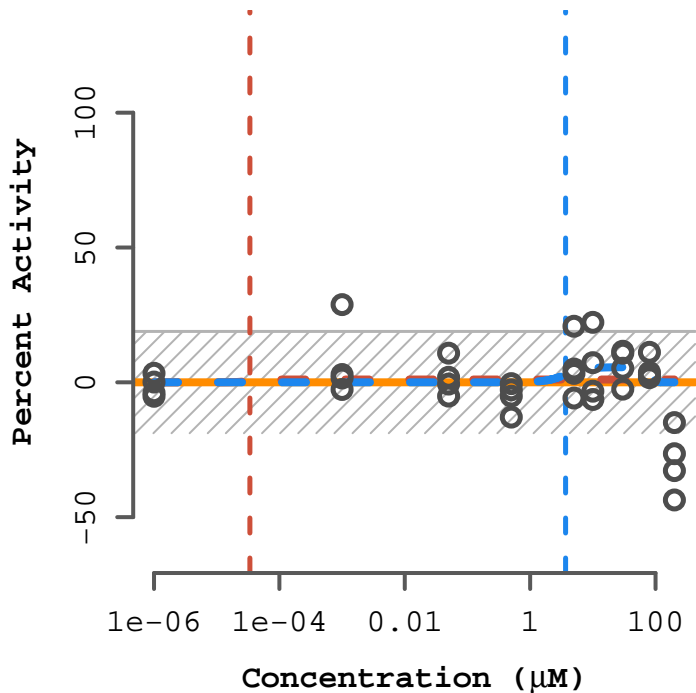

ASSAY: AEID3097 (CCTE\_Deisenroth\_DEVTOX\_RUES2-GLR\_Cel.

NAME: (2R,3S)-2-(3,4-Dihydroxyphenyl)-3,4-dihydro-2H-

CHID: 1017388 CASRN: 225937-10-0

SPID(S): ES211\_22\_22

M4ID: 42676135

HILL MODEL (in red):

|      | tp   | ga    | gw   |
|------|------|-------|------|
| val: | 1.04 | -4.47 | 4.26 |
| sd:  | 1.83 | 366   | 1050 |

GAIN-LOSS MODEL (in blue):

|      | tp   | ga    | gw   | la   | lw   |
|------|------|-------|------|------|------|
| val: | 5.61 | 0.566 | 2.75 | 1.94 | 17.3 |
| sd:  | NaN  | NaN   | NaN  | NaN  | NaN  |

|       | CNST   | HILL   | GNLS   |
|-------|--------|--------|--------|
| AIC:  | 285.31 | 290.99 | 290.97 |
| PROB: | 0.9    | 0.05   | 0.05   |
| RMSE: | 13.62  | 13.69  | 13.14  |

MAX\_MEAN: 7.68 MAX\_MED: 8.02 BMAD: 6.29

COFF: 18.9 HIT-CALL: 0 FITC: 7 ACTP: 0.1

FLAGS:

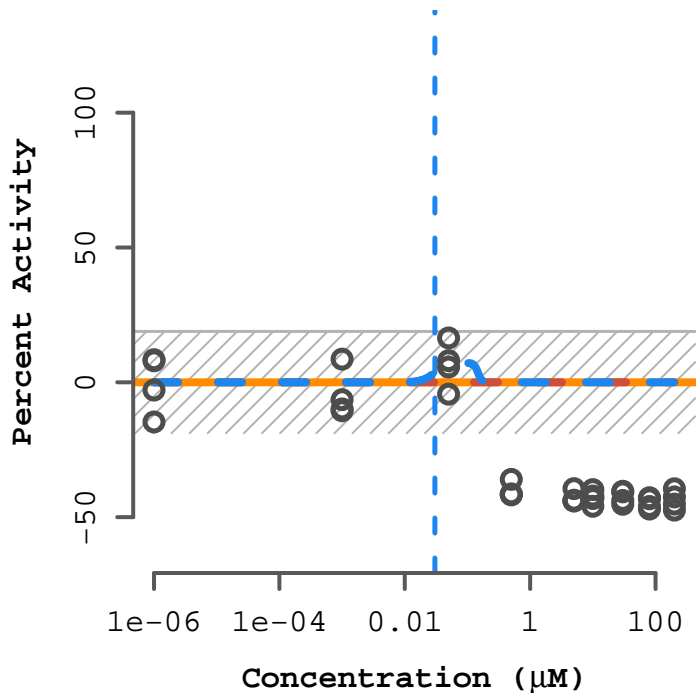

ASSAY: AEID3097 (CCTE\_Deisenroth\_DEVTOX\_RUES2-GLR\_Cel.

NAME: Methotrexate hydrate(1:x)  
 CHID: 1017640 CASRN: 133073-73-1  
 SPID(S): ES211\_45\_45  
 M4ID: 42676144

HILL MODEL (in red):

|      | tp       | ga  | gw   |
|------|----------|-----|------|
| val: | 1.66e-05 | 2.8 | 4.55 |
| sd:  | NaN      | NaN | NaN  |

GAIN-LOSS MODEL (in blue):

|      | tp   | ga    | gw   | la     | lw    |
|------|------|-------|------|--------|-------|
| val: | 7.23 | -1.52 | 4.27 | -0.833 | 14    |
| sd:  | 1030 | 125   | 1020 | 487    | 12800 |

|       | CNST   | HILL   | GNLS  |
|-------|--------|--------|-------|
| AIC:  | 367.68 | 373.68 | 377.5 |
| PROB: | 0.95   | 0.05   | 0.01  |
| RMSE: | 35.4   | 35.4   | 35.34 |

MAX\_MEAN: 6.46      MAX\_MED: 6.87      BMAD: 6.29

COFF: 18.9      HIT-CALL: 0      FITC: 7      ACTP: 0.05

FLAGS: 10

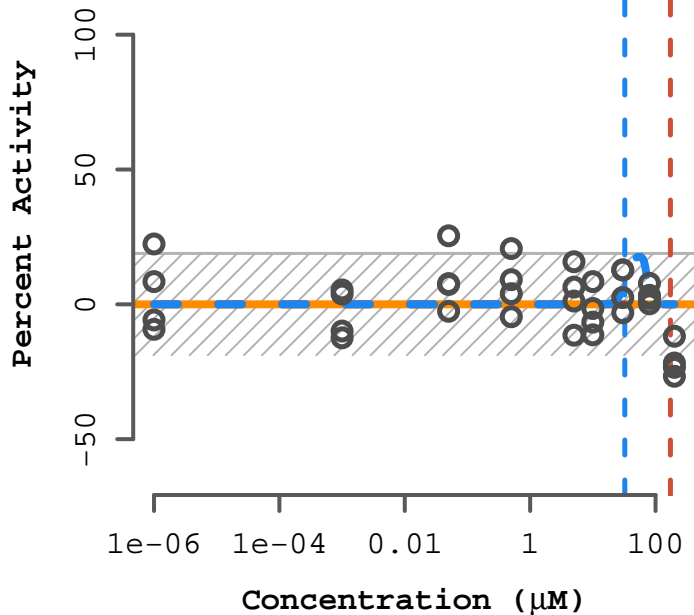

ASSAY: AEID3097 (CCTE\_Deisenroth\_DEVTOX\_RUES2-GLR\_Cel.

NAME: 5,5-Diphenylhydantoin  
 CHID: 20541 CASRN: 57-41-0  
 SPID(S): ES211\_3\_3  
 M4ID: 42676111

HILL MODEL (in red):

|      | tp       | ga   | gw    |
|------|----------|------|-------|
| val: | 4.99e-08 | 2.24 | 0.377 |
| sd:  | NaN      | NaN  | NaN   |

GAIN-LOSS MODEL (in blue):

|      | tp  | ga   | gw   | la   | lw   |
|------|-----|------|------|------|------|
| val: | 18  | 1.51 | 7.79 | 1.87 | 17.4 |
| sd:  | NaN | NaN  | NaN  | NaN  | NaN  |

|       | CNST   | HILL   | GNLS   |
|-------|--------|--------|--------|
| AIC:  | 285.61 | 291.61 | 293.59 |
| PROB: | 0.94   | 0.05   | 0.02   |
| RMSE: | 12.09  | 12.09  | 11.85  |

MAX\_MEAN: 9.49 MAX\_MED: 7.63 BMAD: 6.29

COFF: 18.9 HIT-CALL: 0 FITC: 9 ACTP: 0.06

FLAGS:



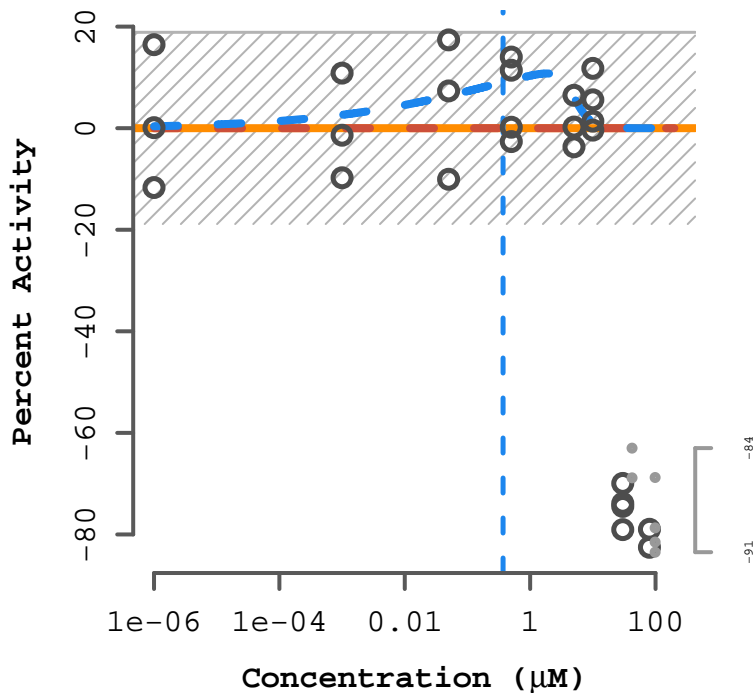

ASSAY: AEID3097 (CCTE\_Deisenroth\_DEVTOX\_RUES2-GLR\_Cel.

NAME: 6-aminopyridine-3-carboxamide

CHID: 51446 CASRN: 329-89-5

SPID(S): ES211\_7\_7

M4ID: 42676172 BRK

HILL MODEL (in red):

|      | tp       | ga   | gw   |
|------|----------|------|------|
| val: | 4.69e-06 | 2.75 | 4.18 |
| sd:  | NaN      | NaN  | NaN  |

GAIN-LOSS MODEL (in blue):

|      | tp   | ga     | gw  | la    | lw   |
|------|------|--------|-----|-------|------|
| val: | 18.1 | -0.432 | 0.3 | 0.694 | 3.33 |
| sd:  | NaN  | NaN    | NaN | NaN   | NaN  |

|       | CNST   | HILL   | GNLS   |
|-------|--------|--------|--------|
| AIC:  | 384.81 | 390.81 | 394.22 |
| PROB: | 0.94   | 0.05   | 0.01   |
| RMSE: | 48.93  | 48.93  | 48.73  |

MAX\_MEAN: 9.62 MAX\_MED: 12.4 BMAD: 6.29

COFF: 18.9 HIT-CALL: 0 FITC: 9 ACTP: 0.06

FLAGS: 10

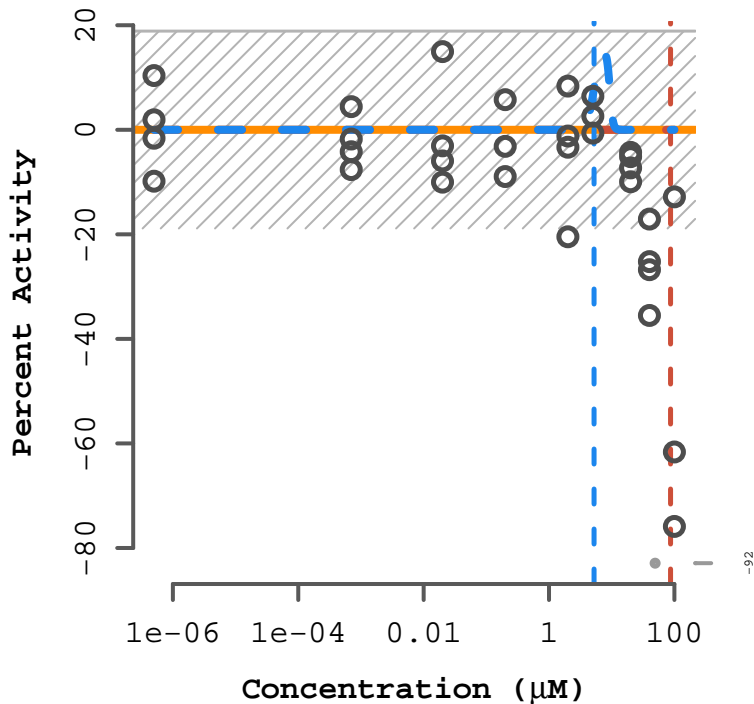

ASSAY: AEID3097 (CCTE\_Deisenroth\_DEVTOX\_RUES2-GLR\_Cel.

NAME: Ketanserin tartrate

CHID: 1003945 CASRN: 83846-83-7

SPID(S): ES211\_40\_40

M4ID: 42676133 BRK

HILL MODEL (in red):

|      | tp       | ga   | gw    |
|------|----------|------|-------|
| val: | 9.22e-09 | 1.94 | 1.64  |
| sd:  | 4.84e-05 | 4050 | 37600 |

GAIN-LOSS MODEL (in blue):

|      | tp   | ga    | gw   | la    | lw   |
|------|------|-------|------|-------|------|
| val: | 15.8 | 0.718 | 7.85 | 0.969 | 17.8 |
| sd:  | 396  | 2.42  | 49.8 | 33.1  | 1770 |

|       | CNST   | HILL   | GNLS   |
|-------|--------|--------|--------|
| AIC:  | 320.52 | 326.52 | 329.53 |
| PROB: | 0.94   | 0.05   | 0.01   |
| RMSE: | 25.47  | 25.47  | 25.36  |

MAX\_MEAN: 7.16 MAX\_MED: 4.52 BMAD: 6.29

COFF: 18.9 HIT-CALL: 0 FITC: 9 ACTP: 0.06

FLAGS: 10

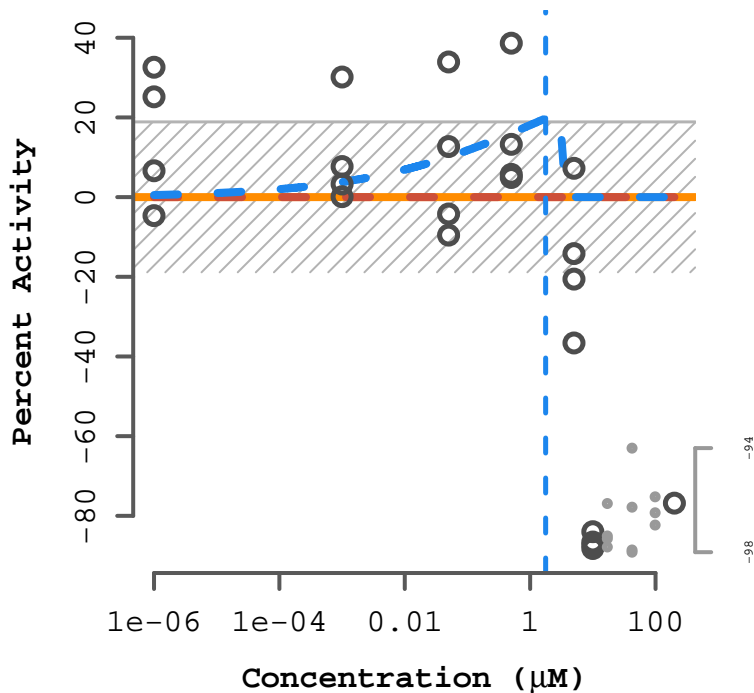

ASSAY: AEID3097 (CCTE\_Deisenroth\_DEVTOX\_RUES2-GLR\_Cel.

NAME: Gefitinib

CHID: 41034 CASRN: 184475-35-2

SPID(S): ES211\_34\_34

M4ID: 42676129 BRK

HILL MODEL (in red):

|      | tp    | ga  | gw   |
|------|-------|-----|------|
| val: | 0.929 | 2.8 | 7.94 |
| sd:  | NaN   | NaN | NaN  |

GAIN-LOSS MODEL (in blue):

|      | tp   | ga    | gw  | la    | lw   |
|------|------|-------|-----|-------|------|
| val: | 39.5 | 0.247 | 0.3 | 0.519 | 17.9 |
| sd:  | NaN  | NaN   | NaN | NaN   | NaN  |

|       | CNST   | HILL   | GNLS   |
|-------|--------|--------|--------|
| AIC:  | 407.33 | 413.33 | 416.74 |
| PROB: | 0.94   | 0.05   | 0.01   |
| RMSE: | 63.76  | 63.76  | 63.42  |

MAX\_MEAN: 15.6 MAX\_MED: 15.9 BMAD: 6.29

COFF: 18.9 HIT-CALL: 0 FITC: 10 ACTP: 0.06

FLAGS: 10

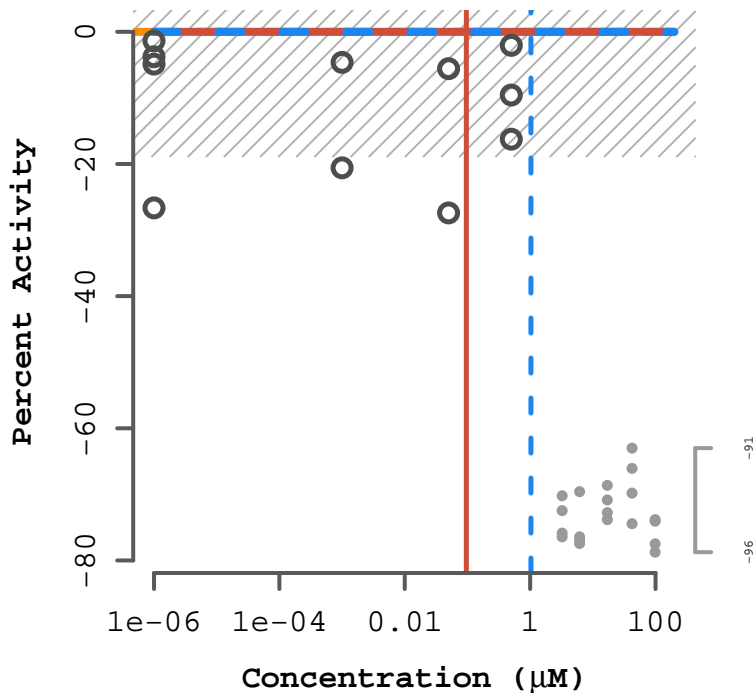

ASSAY: AEID3097 (CCTE\_Deisenroth\_DEVTOX\_RUES2-GLR\_Cel.

NAME: Diethylstilbestrol

CHID: 20465 CASRN: 56-53-1

SPID(S): ES211\_29\_29

M4ID: 42676152 BRK

HILL MODEL (in red):

|      | tp       | ga    | gw    |
|------|----------|-------|-------|
| val: | 7.73e-10 | -1.02 | 0.507 |
| sd:  | NaN      | NaN   | NaN   |

GAIN-LOSS MODEL (in blue):

|      | tp       | ga     | gw    | la   | lw     |
|------|----------|--------|-------|------|--------|
| val: | 4.16e-08 | 0.0123 | 1.29  | 1.1  | 4.03   |
| sd:  | 0.000695 | 110000 | 22500 | 5690 | 965000 |

|       | CNST   | HILL   | GNLS   |
|-------|--------|--------|--------|
| AIC:  | 436.24 | 422.54 | 426.54 |
| PROB: | 0      | 0.88   | 0.12   |
| RMSE: | 71.09  | 71.09  | 71.09  |

MAX\_MEAN: -1.55 MAX\_MED: 0.78 BMAD: 6.29

COFF: 18.9 HIT-CALL: 0 FITC: 13 ACTP: 1

FLAGS: 10
