# Supplementary material for: The DevTox Germ Layer Reporter Platform: An Assay Adaptation of the Human Pluripotent Stem Cell Test
Source: Toxics. 2022 Jul 13;10(7):392. doi: 10.3390/toxics10070392 (PMC9321663; doi:10.3390/toxics10070392)
Supplement: Supplementary file 1 [file toxics-10-00392-s001.zip]

Archive with 10 entries (10 files):
- AEID3093_L6_CCTE_Deisenroth_DEVTOX_RUES2-GLR_Sox17_up_210917.pdf
- AEID3094_L6_CCTE_Deisenroth_DEVTOX_RUES2-GLR_Sox17_dn_210917.pdf
- AEID3095_L6_CCTE_Deisenroth_DEVTOX_RUES2-GLR_Sox2_up_210917.pdf
- AEID3096_L6_CCTE_Deisenroth_DEVTOX_RUES2-GLR_Bra_up_210917.pdf
- AEID3097_L6_CCTE_Deisenroth_DEVTOX_RUES2-GLR_CellCount_up_210917.pdf
- AEID3098_L6_CCTE_Deisenroth_DEVTOX_RUES2-GLR_CellCount_dn_210917.pdf
- Gamble_DevTox GLR_Sup Fig_v1.pdf
- Gamble_DevTox GLR_Sup Tables_v1.xlsx
- Gamble_DevTox GLR_Tables_v1.xlsx
- README_Gamble_DevTox GLR_Sup Data_v1.pdf
