# Supplementary material for: The DevTox Germ Layer Reporter Platform: An Assay Adaptation of the Human Pluripotent Stem Cell Test
Source: Toxics. 2022 Jul 13;10(7):392. doi: 10.3390/toxics10070392 (PMC9321663; doi:10.3390/toxics10070392)
Supplement: Supplementary file 1 [file toxics-10-00392-s001.zip › Gamble_DevTox GLR_Sup Tables_v1.xlsx]

## Sheet: Table S1 Chems
CASRN	Chemical Name	DTXSID	Supplier	Catalog Number	Lot Number	% Purity	Molecular Weight	Solvent	Stock Conc. (mM)	Highest Test Conc. (µM)	Classification	Category	Reference (DOI)
57-55-6	1,2-Propylene glycol	DTXSID0021206	Sigma	398039-25ML	MKCH2860	99.5	76.09	DMSO	100	200	Non-Teratogen	Training	10.1093/toxsci/kfaa014
4759-48-2	13-cis Retinoic acid	DTXSID4023177	Cayman Chemical	21648-50mg	0531525-21	98	300.44	DMSO	100	200	Teratogen	Training	10.1093/toxsci/kft239
57-41-0	5,5-Diphenylhydantoin	DTXSID8020541	Cayman Chemical	24037-50g	0534284-14	100	252.3	DMSO	100	200	Teratogen	Training	10.1093/toxsci/kfaa014
59-14-3	5-Bromo-2'-deoxyuridine	DTXSID7033105	Cayman Chemical	15580-50mg	0586840-1	99.6	307.1	DMSO	100	200	Teratogen	Training	10.1093/toxsci/kft239; 10.1177/026119290203000204
51-21-8	5-Fluorouracil	DTXSID2020634	Cayman Chemical	14416-5g	0499389-35	100	130.1	DMSO	100	200	Teratogen	Training	10.1093/toxsci/kft239; 10.1093/toxsci/kfaa014
329-89-5	6-Aminonicotinamide	DTXSID5051446	Cayman Chemical	10009315-100mg	0494080-34	100	137.14	DMSO	100	200	Teratogen	Training	10.1093/toxsci/kft239; 10.1177/026119290203000204
51-52-5	6-Propyl-2-thiouracil	DTXSID5021209	Cayman Chemical	14069-10G	0589103-11	99.6	170.2	DMSO	100	200	Teratogen	Training	10.1093/toxsci/kfaa014
103-90-2	Acetaminophen	DTXSID2020006	Cayman Chemical	10024-100G	0489606-36	100	151.16	DMSO	100	200	Non-Teratogen	Training	10.1093/toxsci/kfaa014
79-06-1	Acrylamide	DTXSID5020027	Sigma	A9099-25G	BCCD0221	100	71.08	DMSO	100	200	Non-Teratogen	Training	10.1093/toxsci/kfaa014; 10.1177/026119290203000204
50-76-0	Actinomycin D	DTXSID9020031	Cayman Chemical	11421-25mg	0604376-3	100	1255.5	DMSO	100	200	Teratogen	Training	10.1093/toxsci/kft239
59277-89-3	Acyclovir	DTXSID1022556	Cayman Chemical	14160-25mg	0446416-35	100	225.2	DMSO	100	200	Non-Teratogen	Training	10.1093/toxsci/kft239
302-79-4	All-Trans-Retinoic Acid	DTXSID7021239	Sigma	R2625-50MG	SLCB4143	98	300.44	DMSO	100	200	Teratogen	Reference	10.1093/toxsci/kft239; 10.1093/toxsci/kfaa014; 10.1177/026119290203000204
19774-82-4	Amiodarone hydrochloride	DTXSID7037185	Cayman Chemical	15213-500mg	0529436-16	100	681.77	DMSO	100	200	Teratogen	Training	10.1093/toxsci/kfaa014
50-78-2	Aspirin	DTXSID5020108	Sigma	A5376-100G	SLCC4307	99.9	180.16	DMSO	100	200	Non-Teratogen	Reference	10.1093/toxsci/kft239; 10.1093/toxsci/kfaa014
80-05-7	Bisphenol A	DTXSID7020182	Sigma	239658-50G	MKCD7508	100	228.29	DMSO	100	200	Teratogen	Training	10.1093/toxsci/kfaa014
10043-35-3	Boric acid	DTXSID1020194	Sigma	B6768-500G	BCCD3023	100	61.83	DMSO	100	200	Teratogen	Training	10.1093/toxsci/kfaa014; 10.1177/026119290203000204
55-98-1	Busulfan	DTXSID3020910	Cayman Chemical	14843-25G	0532626-22	100	246.3	DMSO	100	200	Teratogen	Training	10.1093/toxsci/kfaa014
94-26-8	Butylparaben	DTXSID3020209	Sigma	PHR1022-1G	LRAC8708	99.9	194.23	DMSO	100	200	Non-Teratogen	Training	10.1093/toxsci/kfaa014
58-08-2	Caffeine	DTXSID0020232	Sigma	PHR1099-1G	LRAB7780	99.95	194.19	DMSO	100	200	Non-Teratogen	Reference	10.1093/toxsci/kft239; 10.1093/toxsci/kfaa014
298-46-4	Carbamazepine	DTXSID4022731	Sigma	C4024-1g	MKCK3782	100	236.27	DMSO	100	200	Teratogen	Training	10.1093/toxsci/kft239; 10.1093/toxsci/kfaa014
154-23-4	Cianidanol (Catechin)	DTXSID3022322	Cayman Chemical	70940-1g	0532624-20	100	290.27	DMSO	100	200	Non-Teratogen	Training	10.1093/toxsci/kft239
4449-51-8	Cyclopamine	DTXSID6043709	Cayman Chemical	11321-10mg	0568589-13	98	411.62	DMSO	20	40	Teratogen	Training	10.1093/toxsci/kfaa014
6055-19-2	Cyclophosphamide monohydrate	DTXSID6024888	Cayman Chemical	13849-1g	0491131-33	99.6	279.1	DMSO	100	200	Teratogen	Training	10.1093/toxsci/kfaa014
69-74-9	Cytarabine hydrochloride	DTXSID5024891	Sigma	C6645-25mg	SLCD2059	100	279.68	DMSO	100	200	Teratogen	Training	10.1093/toxsci/kfaa014
302962-49-8	Dasatinib	DTXSID4040979	Cayman Chemical	11498-10mg	0529069-69	100	488.01	DMSO	100	200	Teratogen	Training	10.1093/toxsci/kft239
464-49-3	D-Camphor	DTXSID4024721	Sigma	857300-5G	MKCD6086	98.3	152.23	DMSO	100	200	Non-Teratogen	Training	10.1093/toxsci/kfaa014; 10.1177/026119290203000204
2392-39-4	Dexamethasone sodium phosphate	DTXSID3047429	Cayman Chemical	20340-100mg	0557307-5	100	516.4	DMSO	10	20	Teratogen	Reference	10.1093/toxsci/kfaa014
56-53-1	Diethylstilbestrol	DTXSID3020465	Sigma	D4628-1G	BCBX0570	99.3	268.35	DMSO	100	200	Teratogen	Training	10.1093/toxsci/kft239; 10.1093/toxsci/kfaa014
131-11-3	Dimethyl phthalate	DTXSID3022455	Sigma	W508500-SAMPLE	MKBZ7622V	99.8	194.18	DMSO	100	200	Non-Teratogen	Training	10.1093/toxsci/kfaa014; 10.1177/026119290203000204
147-24-0	Diphenhydramine hydrochloride	DTXSID4020537	Cayman Chemical	11158-100mg	0516685-9	100	291.82	DMSO	100	200	Teratogen	Training	10.1093/toxsci/kfaa014; 10.1177/026119290203000204
866405-64-3	Dorsomorphin	DTXSID401006988	Cayman Chemical	11967-5mg	0559841-28	100	399.5	DMSO	100	200	Teratogen	Training	10.1093/toxsci/kft239
25316-40-9	Doxorubicin	DTXSID3030636	Cayman Chemical	15007-10mg	0586838-24	100	543.52	DMSO	100	200	Teratogen	Training	10.1093/toxsci/kft239
668985-31-7	Esomeprazole	DTXSID70746660	Sigma	E7906-50mg	106M4703V	98	713.12	DMSO	100	200	Non-Teratogen	Training	10.1093/toxsci/kft239
107-21-1	Ethylene glycol	DTXSID8020597	Sigma	324558-100mL	SHBL0616	99.96	62.07	DMSO	100	200	Teratogen	Training	10.1093/toxsci/kfaa014
59-30-3	Folic Acid	DTXSID0022519	Sigma	F7875-1G	SLCB7119	97	441.4	DMSO	100	200	Non-Teratogen	Reference	10.1093/toxsci/kft239; 10.1093/toxsci/kfaa014
184475-35-2	Gefitinib	DTXSID8041034	Cayman Chemical	13166-250mg	0456150-64	100	446.9	DMSO	100	200	Teratogen	Training	10.1093/toxsci/kft239
127-07-1	Hydroxyurea	DTXSID6025438	Alfa Aesar	A10831	10207101	98.8	76.05	DMSO	100	200	Teratogen	Training	10.1093/toxsci/kfaa014; 10.1177/026119290203000204
15687-27-1	Ibuprofen	DTXSID5020732	Cayman Chemical	70280-500mg	0528072-29	100	206.28	DMSO	100	200	Non-Teratogen	Training	10.1093/toxsci/kft239
220127-57-1	Imatinib	DTXSID9040502	Cayman Chemical	13139-25mg	0450298-88	98.2	493.6	DMSO	100	200	Teratogen	Training	10.1093/toxsci/kft239
53-86-1	Indomethacin	DTXSID9020740	Cayman Chemical	70270-1000mg	0456717-34	100	357.8	DMSO	100	200	Teratogen	Training	10.1093/toxsci/kfaa014
54-85-3	Isoniazid	DTXSID8020755	Cayman Chemical	20378	0490177-19	100	137.1	DMSO	100	200	Non-Teratogen	Training	10.1093/toxsci/kfaa014
74050-98-9	Ketanserin	DTXSID3023188	Cayman Chemical	22058-50mg	0510141-13	100	545.5	DMSO	100	200	Non-Teratogen	Training	10.1093/toxsci/kft239
191732-72-6	Lenalidomide	DTXSID8046664	Sigma	SML2283-100MG	0000109109	99.3	259.26	DMSO	100	200	Teratogen	Training	10.1038/s41598-020-59542-x
75330-75-5	Lovastatin	DTXSID5020784	Cayman Chemical	10010338	0459734-66	100	404.5	DMSO	100	200	Teratogen	Training	10.1093/toxsci/kfaa014
4376-20-9	MEHP	DTXSID2025680	Sigma	796832-500MG	MKCN8228	99.6	278.34	DMSO	100	200	Teratogen	Training	10.1093/toxsci/kfaa014
133073-73-1	Methotrexate	DTXSID601017640	Cayman Chemical	13960-50mg	0586841-6	98.9	454.44	DMSO	100	200	Teratogen	Training	10.1093/toxsci/kfaa014; 10.1177/026119290203000204
41372-08-1	Methyldopa	DTXSID5020863	Sigma	857416-5G	1418980	99.9	238.24	DMSO	100	200	Non-Teratogen	Training	10.1093/toxsci/kft239
21535-47-7	Mianserin	DTXSID30944145	Sigma	M2525-100mg	038H47274	99.8	300.83	DMSO	100	200	Teratogen	Training	10.1093/toxsci/kft239
59-67-6	Niacin	DTXSID1020932	Sigma	N4126-5G	SLCC3408	100	123.11	DMSO	100	200	Non-Teratogen	Training	10.1093/toxsci/kft239
113-98-4	Penicillin G	DTXSID7045106	Cayman Chemical	21615-5g	0514575-11	100	372.48	DMSO	100	200	Non-Teratogen	Training	10.1093/toxsci/kft239; 10.1177/026119290203000204
19171-19-8	Pomalidomide	DTXSID40893458	Cayman Chemical	19877-25MG	0526748-10	100	273.24	DMSO	100	200	Teratogen	Training	10.1038/s41598-020-59542-x
68-26-8	Retinol	DTXSID3023556	Cayman Chemical	20241-50mg	0583536-9	98	286.5	DMSO	100	200	Non-Teratogen	Training	10.1093/toxsci/kfaa014
13292-46-1	Rifampicin	DTXSID6021244	Cayman Chemical	14423-100mg	0597066-1	100	822.94	DMSO	100	200	Teratogen	Training	10.1093/toxsci/kfaa014
87051-43-2	Ritanserin	DTXSID9042594	Cayman Chemical	21374-5mg	0563149-2	98	477.6	DMSO	50	100	Teratogen	Training	10.1093/toxsci/kft239
81-07-2	Saccharin	DTXSID5021251	Sigma	240931-1G	MKCJ9810	100	183.18	DMSO	100	200	Non-Teratogen	Reference	10.1093/toxsci/kft239; 10.1093/toxsci/kfaa014; 10.1177/026119290203000204
69-72-7	Salicylic acid	DTXSID7026368	Sigma	247588-100G	MKCN7045	99.6	138.12	DMSO	100	200	Non-Teratogen	Training	10.1093/toxsci/kfaa014; 10.1177/026119290203000204
301836-41-9	SB-431542	DTXSID7042693	Tocris	1614-10mg	14A/250149	99.1	384.39	DMSO	10	20	Antagonist	Control	10.1093/toxsci/kft239
284461-73-0	Sorafenib	DTXSID7041128	Cayman Chemical	10009644-10mg	0431723-179	100	464.82	DMSO	100	200	Teratogen	Training	10.1093/toxsci/kft239
3056-17-5	Stavudine	DTXSID1023819	Cayman Chemical	14975-100mg	0471461-19	99.1	224.21	DMSO	100	200	Teratogen	Training	10.1093/toxsci/kfaa014
599-79-1	Sulfasalazine	DTXSID0021256	Cayman Chemical	15025-5g	0448718-35	100	398.4	DMSO	100	200	Non-Teratogen	Training	10.1093/toxsci/kfaa014
341031-54-7	Sunitinib	DTXSID4046492	Cayman Chemical	13159-10mg	0473086-49	98	532.56	DMSO	100	200	Teratogen	Training	10.1093/toxsci/kft239
189188-57-6	Tegaserod maleate	DTXSID50904761	Cayman Chemical	14692-10mg	0459347-14	98	417.46	DMSO	100	200	Non-Teratogen	Training	10.1093/toxsci/kft239; 10.1038/s41598-020-59542-x
50-35-1	Thalidomide	DTXSID9022524	Cayman Chemical	14610	0485409-20	99.2	258.23	DMSO	100	200	Teratogen	Reference	10.1093/toxsci/kft239; 10.1093/toxsci/kfaa014
99-66-1	Valproic Acid	DTXSID6023733	Sigma	PHR1061-1G	LRAC5650	99.8	144.21	DMSO	100	200	Teratogen	Reference	10.1093/toxsci/kft239; 10.1093/toxsci/kfaa014; 10.1177/026119290203000204
443913-73-3	Vandetanib	DTXSID1046681	Cayman Chemical	14706-10mg	0539477-12	100	475.36	DMSO	100	200	Teratogen	Training	10.1093/toxsci/kft239
81-81-2	Warfarin	DTXSID5023742	Cayman Chemical	13566-1g	0424854-15	100	308.3	DMSO	100	200	Teratogen	Training	10.1093/toxsci/kfaa014
146939-27-7	Ziprasidone	DTXSID4023753	Cayman Chemical	15031-5mg	0547970-10	100	412.94	DMSO	20	40	Teratogen	Training	10.1093/toxsci/kft239

## Sheet: Table S2 Chemical ACCs
Chemicals	Hit Call	Development Toxicant Classification	Category	DevTox ACC (µM)	Cell Count ACC (µM)	DevTox % Max Inhibition	Cell Count % Max Inhibition
Actinomycin D	Positive	Positive	Training	2.88107e-05	0.000357408	101.487	96.0201
Doxorubicin	Positive	Positive	Training	0.00124177	0.0013292	101.307	93.876
Dasatinib	Positive	Positive	Training	0.329917	0.00532515	101.616	95.9622
Cytarabine	Positive	Positive	Training	0.455711	0.052307	101.616	86.7492
Lenalidomide	Positive	Positive	Reference	0.0502554	0.117441	78.8513	44.2076
Pomalidomide	Positive	Positive	Reference	0.0191121	0.27004	95.9127	37.2131
Methotrexate	Negative	Positive	Training	>200	0.34741	24.559	44.6139
Sorafenib	Positive	Positive	Training	0.500355	0.49927	101.616	95.8174
Diethylstilbestrol	Positive	Positive	Training	0.535851	0.595907	101.073	95.7228
Sunitinib	Positive	Positive	Training	0.518395	0.608743	101.616	97.6704
Lovastatin	Positive	Positive	Training	0.93447	0.714479	101.616	95.3898
Ziprasidone	Positive	Positive	Training	2.99723	1.52692	101.165	93.7169
Vandetanib	Positive	Positive	Training	4.12266	2.12446	101.616	98.3005
All-Trans-Retinoic Acid	Positive	Positive	Reference	0.0416607	3.83877	100.78	97.6129
5-Bromo-2'-deoxyuridine	Positive	Positive	Training	0.459134	3.99435	101.616	87.6029
13-cis Retinoic acid	Positive	Positive	Training	0.0211691	4.12244	100.964	97.7228
5-Fluorouracil	Positive	Positive	Training	7.07097	4.17947	102.15	91.004
Tegaserod maleate	Positive	Negative	Training	4.47242	4.23906	101.616	98.7781
Gefitinib	Positive	Positive	Training	4.58375	5.08008	101.073	97.2995
Busulfan	Positive	Positive	Training	25.262	5.79486	100.042	82.3004
Dorsomorphin	Positive	Positive	Training	8.64971	6.30717	99.6457	95.1357
Ritanserin	Positive	Positive	Training	8.38861	6.42587	101.975	94.6547
Indomethacin	Positive	Positive	Training	9.38454	8.70152	100.65	92.539
Imatinib	Positive	Positive	Training	10.3901	9.46456	101.292	97.8288
Amiodarone	Positive	Positive	Training	14.2236	11.1419	99.6833	97.1487
Retinol	Positive	Negative	Training	13.0451	12.6287	94.5321	97.3202
Dexamethasone	Negative	Positive	Training	>200	13.83	21.8449	23.7311
Diphenhydramine	Positive	Positive	Training	16.778	14.3414	95.1239	78.9064
Butylparaben	Positive	Negative	Training	34.4685	16.3573	101.927	91.7975
Rifampicin	Positive	Positive	Training	37.8542	18.1066	101.461	92.4066
Mianserin	Positive	Positive	Training	13.5618	18.6008	101.165	97.6739
6-Aminonicotinamide	Positive	Positive	Training	12.5605	20.3443	100.934	89.9413
Bisphenol A	Positive	Positive	Training	31.7467	21.1157	102.071	94.4133
Esomeprazole	Positive	Negative	Training	12.9286	28.1982	100.995	94.012
Ketanserin	Positive	Negative	Training	39.2719	33.5346	33.2583	68.7499
Carbamazepine	Positive	Positive	Training	64.024	57.7753	52.1586	39.1041
MEHP	Positive	Positive	Training	76.3285	61.5464	67.6802	76.1511
Hydroxyurea	Negative	Positive	Training	>200	64.5432	15.8672	34.555
Stavudine	Negative	Positive	Training	>200	90.2805	11.3522	23.8752
Cyclophosphamide	Negative	Positive	Training	>200	100.193	7.48871	25.6015
Ibuprofen	Positive	Negative	Training	147.626	122.424	23.8553	22.201
Cianidanol	Positive	Negative	Training	93.5186	180.189	39.7961	29.5953
5,5-Diphenylhydantoin	Positive	Positive	Training	201.562	191.824	21.047	22.5588
Warfarin	Positive	Positive	Training	93.3273	197.749	26.8806	19.1026
Thalidomide	Positive	Positive	Reference	0.25232	>200	79.0852	19.4883
Valproic Acid	Positive	Positive	Training	177.332	>200	22.3029	18.0989
Methyldopa	Positive	Negative	Training	217.84	>200	23.5419	10.2022
1,2-Propylene glycol	Negative	Negative	Training	>200	>200	5.48364	12.9966
6-Propyl-2-thiouracil	Negative	Positive	Training	>200	>200	16.6439	12.8906
Acetaminophen	Negative	Negative	Training	>200	>200	10.5244	13.0767
Acrylamide	Negative	Negative	Training	>200	>200	9.42293	16.9643
Acyclovir	Negative	Negative	Training	>200	>200	7.78694	7.76874
Aspirin	Negative	Negative	Reference	>200	>200	12.4084	2.84921
Boric acid	Negative	Positive	Training	>200	>200	16.7249	12.3286
Caffeine	Negative	Negative	Reference	>200	>200	9.40518	10.3173
Cyclopamine	Negative	Positive	Training	>200	>200	22.6691	9.1976
D-Camphor	Negative	Negative	Training	>200	>200	9.32973	7.56245
Dimethyl phthalate	Negative	Negative	Training	>200	>200	6.70154	11.9413
Ethylene glycol	Negative	Positive	Training	>200	>200	6.93112	7.04444
Folic Acid	Negative	Negative	Reference	>200	>200	16.3574	13.6619
Isoniazid	Negative	Negative	Training	>200	>200	3.98936	7.41654
Niacin	Negative	Negative	Training	>200	>200	6.06349	10.8366
Penicillin G	Negative	Negative	Training	>200	>200	10.2878	13.3495
Saccharin	Negative	Negative	Reference	>200	>200	12.9509	17.8875
Salicylic acid	Negative	Negative	Training	>200	>200	6.90501	11.4829
Sulfasalazine	Negative	Negative	Training	>200	>200	11.7996	8.85531

## Sheet: RUES2-GLR Z-test scores
Cell Line (Lineage)	pluri Z-test score	ecto Z-test score	meso Z-test score	endo Z-test score
HUES1 (Pluri) avg	-0.191668	0.39057	2.13388	4.35877
HUES6 (Pluri) avg	1.38303	4.16577	0.899416	2.25909
HUES9 (Pluri) avg	-2.00902	-3.48545	-2.9483	-3.89896
hues28 (Pluri) avg	1.64466	-1.80723	0.0292775	2.01792
HUES48 (Pluri) avg	-2.4002	3.99746	-0.135338	-1.84082
HuES53P24EN (Pluri) avg	2.16747	-0.503308	1.01908	4.51145
HUES63 (Pluri) avg	-1.11251	-3.19487	-2.52967	-4.53302
Hues64 (Pluri) avg	-3.84823	-2.06164	4.57185	4.66988
H1 (Pluri) avg	0.404073	3.59719	-0.0678444	2.30483
H9 (Pluri) avg	-1.01951	-2.3121	-0.956511	-3.938
HUES1 (DE) avg	-3.02185	2.05448	2.32245	9.69432
HUES6 (DE) avg	-1.44156	-1.41117	-0.507121	3.79194
HUES9 (DE) avg	-4.00707	-2.48876	2.04656	4.01775
hues28 (DE) avg	-2.56155	-4.17605	1.51989	6.49316
HUES48 (DE) avg	-3.36813	-2.32634	0.402532	8.33619
HuES53P24EN (DE) avg	-0.808895	-3.52106	0.242881	6.95122
HUES63 (DE) avg	-4.16726	-5.216	1.64703	6.82771
Hues64 (DE) avg	-4.68167	-2.65824	1.40857	7.89349
H1 (DE) avg	-2.79027	3.02836	1.01493	8.00529
H9 (DE) avg	-2.72123	-3.29359	-1.47033	4.40993
2020-01-15 RUES2-GLR (Pluri) Rep1	0.95113	-4.53484	0.653136	-0.873042
2021-12-13 RUES2-GLR (Pluri) Rep2	-6.44173	-7.1854	-1.5357	-6.59823
2021-12-15 RUES2-GLR (Pluri) Rep3	-1.18579	-5.87699	-0.69562	-4.02122
2020-01-15 RUES2-GLR (DE) Rep1	-7.00288	-6.13255	0.190914	5.73058
2021-12-13_RUES2-GLR (DE) Rep2	-7.87401	-5.84417	-1.30985	4.6116
2021-12-15_RUES2-GLR (DE) Rep3	-7.4454	-6.82884	-0.784452	5.58222

## Sheet: RUES2-GLR gene expression
Highlighted rows are reference genes		Average Ct values from reference pluripotent stem cell lines from Tsankov A, et al. 2015 (DOI: 10.1038/nbt.3387)											RUES2-GLR Pluripotent (Ct values)				RUES2-GLR Directed Endoderm (Ct values)
Genes	Lineage	HUES1	HUES6	HUES9	hues28	HUES48	HuES53P24EN	HUES63	Hues64	H1	H9		2020-01-15 Pluri-RUES2-GLR Day3	2021-12-13 RUES2-GLR Pluri1 Day3	2021-12-15 RUES2-GLR Pluri2 Day3		2020-01-15 DE_RUES2-GLR Day3	2021-12-13_RUES2-GLR DE1	2021-12-15_RUES2-GLR DE2
ACTB	Control	17.414	18.193	17.089	18.598	18.192	18.571	18.226	18.119	17.977	18.295		22.0498	20.2777	18.9863		22.9952	18.82	19.3211
CTCF	Control	24.261	24.191	23.974	25.731	25.266	24.389	25.43	24.879	24.21	24.648		25.2178	24.8117	24.7676		27.2808	25.2506	24.9867
ACTB	Control	23.151	23.228	25.171	25.328	25.319	25.437	25.02	27.814	21.581	25.441		31.9608	38.1316	31.8108		34.8128	31.3387	31.4018
SEV	Control	40	40	40	40	40	40	40	40	40	40		40	40	40		40	40	40
MYC	Control	25.348	25.041	24.722	27.255	27.111	25.32	25.895	26.863	25.42	25.99		28.3794	31.52	25.7034		31.5045	26.309	26.4381
ACTB	Control	23.151	23.228	25.171	25.328	25.319	25.437	25.02	27.814	21.581	25.441		33.1621	33.4319	29.8971		34.5039	31.5422	31.1187
JARID2	Control	22.689	22.934	22.92	24.079	23.661	22.681	22.622	23.062	23.361	23.222		24.624	30.2713	22.977		27.7669	25.4133	25.072
SMAD1	Control	26.283	25.977	26.036	27.251	26.499	26.008	26.767	26.222	26.332	27.123		26.3978	24.9239	25.272		28.4249	26.0354	26.0651
CD44	Control	40	40	35.772	35.635	40	35.901	40	40	40	40		40	40	40		40	40	40
EP300	Control	25.182	24.774	24.974	26.162	26.683	24.681	25.574	25.878	25.008	25.967		28.2589	28.8291	25.8828		30.4202	26.2237	26.146
ACTB	Control	17.414	18.193	17.089	18.598	18.192	18.571	18.226	18.119	17.977	18.295		20.9056	20.9511	18.8466		22.8837	18.821	19.3726
NR2F2	Ectoderm	31.061	30.672	34.252	35.414	30.637	33.341	35.486	34.963	29.858	33.836		40	40	36.7219		40	40	40
PAX3	Ectoderm	30.007	29.979	33.882	34.406	30.99	35.115	36.581	34.196	29.168	35.039		40	40	40		40	40	40
PAX6	Ectoderm	30.381	27.394	28.392	32.903	30.11	29.548	32.756	31.627	27.536	31.035		38.0054	38.3296	34.7558		36.3445	32.0542	33.3331
WNT1	Ectoderm	30.993	31.335	34.994	33.62	27.754	33.976	35.347	32.95	31.351	35.085		40	40	40		40	40	40
SDC2	Ectoderm	24.978	24.245	24.877	26.562	26.22	25.012	25.945	26.48	24.147	25.738		26.1384	26.5378	26.696		32.6315	28.859	27.9326
ZBTB16	Ectoderm	31.036	30.856	30.904	33.984	29.315	31.635	34.503	30.143	31.36	32.418		32.354	31.8936	32.7112		35.5764	37.1243	36.2855
POU4F1	Ectoderm	32.505	34.114	40	35.357	32.977	34.389	35.47	33.662	34.273	35.963		37.0581	36.8963	35.0705		39.0866	33.9499	33.729
OLFM3	Ectoderm	32.086	29.485	30.689	31.979	30.625	32.998	33.813	31.674	29.859	32.491		31.1341	35.7594	30.8022		37.1164	36.1427	35.2275
CDH9	Ectoderm	31.971	28.345	31.654	30.839	31.525	30.44	30.723	31.003	29.037	32.161		39.3036	40	35.0178		40	40	40
MAP2	Ectoderm	29.387	27.153	28.488	31.184	27.432	30.91	30.722	30.412	26.985	29.034		31.9585	40	31.4933		39.2807	34.9834	32.8779
PAPLN	Ectoderm	29.054	28.282	28.706	29.671	29.207	28.554	28.457	32.311	27.91	30.354		36.444	40	33.2976		40	35.4332	38.4241
TRPM8	Ectoderm	34.143	30.803	33.85	35.493	30.144	33.669	34.739	34.769	30.892	35.563		37.7947	40	35.157		40	40	37.6075
LMX1A	Ectoderm	30.528	29.302	32.468	34.865	30.866	30.765	34.137	32.217	29.087	33.113		40	40	35.5738		34.5426	31.7513	31.339
NOS2	Ectoderm	30.29	30.279	30.916	30.172	30.806	30.262	30.741	30.489	30.51	30.42		30.6395	31.8429	29.6943		34.7786	30.2966	32.5008
DMBX1	Ectoderm	29.341	27.559	33.2	30.599	26.901	30.109	31.296	30.873	27.769	32.836		34.4824	33.5973	32.7301		40	36.004	40
EN1	Ectoderm	31.096	30.268	36.03	33.163	27.712	34.381	34.343	29.817	30.581	35.34		36.4446	36.1479	38.2999		36.3215	33.1263	36.116
COL2A1	Ectoderm	28.264	28.777	29.297	31.777	28.429	30.275	29.112	31.066	29.009	29.004		34.0358	40	32.038		35.5146	30.6794	32.0364
DRD4	Ectoderm	28.199	27.27	28.28	29.402	28.775	26.784	27.269	29.35	26.929	29.296		35.5197	40	30.818		40	35.5774	36.826
SOX1	Ectoderm	32.712	32.475	33.043	33.636	32.901	33.136	35.381	33.521	34.022	34.317		37.8808	40	34.5059		40	31.9468	33.1654
MYO3B	Ectoderm	33.011	32.692	36.919	34.663	34.09	33.923	36.634	39.607	32.863	35.234		40	40	40		40	40	40
NR2F1/NR2F2	Ectoderm	27.297	30.342	29.37	32.751	27.78	33.317	34.186	27.645	30.372	29.509		38.4474	40	36.2464		38.0649	35.123	40
FOXP2	Endoderm	31.901	34.057	33.106	34.388	32.875	33.546	36.358	31.545	33.345	33.977		35.4395	38.034	34.9781		37.4812	34.7299	33.5947
CLDN1	Endoderm	29.288	28.419	28.827	30.294	29.383	27.669	28.978	29.306	28.345	29.812		30.3599	30.9247	29.8583		30.6268	26.7278	27.2168
HNF4A	Endoderm	30.217	32.105	32.177	32.207	35.328	30.576	35.455	29.668	32.064	33.718		40	40	40		31.6526	32.8655	32.6096
EOMES	Endoderm	26.905	28.17	29.401	30.41	29.771	29.069	34.857	26.316	28.104	33.28		33.4183	40	32.7413		24.3778	21.0072	21.2334
NODAL	Endoderm	26.343	26.826	27.217	27.983	30.134	27.6	29.979	26.233	26.92	32.922		29.9699	32.3853	28.9069		24.5757	21.9901	22.5665
HHEX	Endoderm	28.561	27.648	31.821	29.839	33.326	28.312	30.362	29.678	28.066	32.966		35.4736	34.9938	31.5291		30.467	26.741	26.3013
CABP7	Endoderm	29.386	30.132	31.246	31.585	32.941	27.589	30.245	31.688	29.842	34.857		35.0011	33.4683	32.2865		40	40	39.8718
SOX17	Endoderm	32.113	33.693	35.003	34.629	36.307	34	37.092	34.359	32.934	37.138		36.5908	37.7276	37.9056		33.2299	30.6232	29.0233
FOXA1	Endoderm	34.538	31.508	33.426	33.407	35.096	31.254	35.516	30.764	31.655	34.747		37.838	36.7979	35.44		33.6603	32.5962	31.7666
HMP19	Endoderm	31.578	32.727	34.976	34.758	33.886	33.568	32.899	33.118	32.527	33.436		34.2067	40	33.4306		38.4228	36.5359	36.6619
PRDM1	Endoderm	29.311	30.733	31.619	30.417	32.816	30.179	32.321	28.652	30.797	30.418		32.1391	33.1125	30.9376		26.3838	23.1462	23.3134
PHOX2B	Endoderm	30.688	40	34.762	40	32.57	40	40	32.62	40	34.082		40	40	40		40	40	40
LEFTY2	Endoderm	30.472	31.425	30.821	30.963	31.374	30.389	32.628	32.375	31.626	32.199		30.5413	33.8002	32.7225		25.1819	25.9569	25.5935
CDH20	Endoderm	31.648	31.493	32.449	34.706	32.285	33.109	34.4	30.473	32.108	32.803		36.2341	34.9147	35.0861		35.1567	32.6804	31.3641
HNF1B	Endoderm	32.115	33.053	33.589	33.614	34.685	31.512	34.767	31.28	33.004	34.542		38.4566	40	34.8027		37.6522	32.1483	32.4112
RXRG	Endoderm	31.82	32.14	33.895	34.877	30.99	33.79	36.328	31.944	32.067	35.298		34.7115	40	36.2482		26.9111	27.4416	27.0921
ELAVL3	Endoderm	29.034	30.754	32.814	30.466	32.196	29.899	30.838	30.584	31.129	32.368		32.0215	35.4859	29.7201		38.7493	36.0878	34.7073
POU3F3	Endoderm	29.127	32.143	32.688	32.236	29.613	31.992	34.842	28.571	32.392	30.978		35.3438	35.5609	34.5816		37.6947	33.0285	33.5658
CPLX2	Endoderm	30.989	30.084	29.798	30.57	32.968	29.606	31.368	31.153	29.949	30.964		32.8442	32.346	31.0174		40	39.2084	36.3965
LEFTY1	Endoderm	29.156	30.44	31.096	29.787	31.597	28.08	32.527	31.873	30.401	34.415		30.6993	40	31.7367		29.2759	27.7814	27.4905
FOXA2	Endoderm	28.706	29.966	31.105	30.857	32.224	29.568	37.063	27.344	30.216	33.482		29.6921	30.5423	30.2042		28.4093	25.805	24.5057
GATA6	Endoderm	27.556	30.434	31.63	31.577	34.161	29.317	35.153	28.894	30.594	35.468		36.9266	36.372	35.1137		26.8889	23.0016	23.0124
FGF4	Mesendoderm	27.987	30.034	33.006	31.892	33.992	29.68	30.982	33.396	29.439	36.782		40	40	34.7313		40	37.196	34.5321
NR5A2	Mesendoderm	28.056	27.445	28.563	28.503	30.239	27.468	29.328	28.314	27.452	31.159		28.8298	29.6893	27.2707		33.0381	30.0352	29.2843
T	Mesendoderm	32.011	33.954	34.619	37.176	35.303	35.529	38.084	34.994	32.61	37.534		40	40	40		40	40	40
PTHLH	Mesendoderm	34.335	34.879	33.201	34.551	33.911	33.678	33.131	32.753	33.977	35.351		37.4874	40	35.3955		34.5636	33.2184	31.0406
NPPB	Mesendoderm	30.27	30.765	29.515	31.688	34.188	29.616	27.77	27.638	31.449	34.372		35.3692	40	32.0193		28.0815	23.2771	25.4362
GDF3	Mesendoderm	26.81	27.691	27.102	27.229	28.674	26.892	29.441	26.129	27.997	29.95		27.6034	27.1105	27.6226		28.4476	27.1053	28.122
NKX2-5	Mesoderm	31.297	33.428	35.596	34.923	35.32	33.054	35.144	30.973	34.318	37.398		32.7142	39.3575	32.5495		33.5558	31.7392	32.8412
SST	Mesoderm	29.328	32.202	33.414	34.339	31.19	32.731	34.934	31.468	32.28	32.296		34.4435	34.7312	33.5871		38.4279	36.7166	31.7987
GATA4	Mesoderm	28.11	28.922	30.721	30.137	33.217	28.397	32.229	26.228	29.509	33.903		34.3032	33.8311	33.9107		25.1397	23.8088	24.7577
KLF5	Mesoderm	30.139	31.535	31.633	32.181	32.905	30.974	31.679	30.571	31.367	33.125		34.3394	31.9415	30.9256		33.3868	27.8788	28.1876
HOPX	Mesoderm	32.97	35.319	39.233	39.031	36.844	37.517	40	31.938	35.068	37.524		40	40	40		40	40	40
IL6ST	Mesoderm	28.476	27.925	28.094	29.342	28.626	27.86	28.917	27.231	28.471	28.678		29.2182	28.1631	27.9622		28.2197	25.7705	26.2223
ABCA4	Mesoderm	33.085	33.967	33.838	32.873	34.561	32.601	34.73	31.992	34.079	34.097		34.6111	35.4121	33.9843		38.3645	36.6564	35.4608
BMP10	Mesoderm	33.006	32.881	38.925	35.578	37.361	35.315	40	29.867	35.35	39.298		40	40	40		38.2369	33.7076	39.4492
CDH5	Mesoderm	35.126	33.081	33.42	33.683	32.717	34.92	35.442	32.356	32.986	32.409		34.1422	35.1891	33.0106		34.3369	33.5096	32.8149
PLVAP	Mesoderm	29.641	30.394	31.114	32.24	31.66	31.973	32.883	26.709	30.548	33.527		34.8978	35.5929	32.3382		37.2026	32.9064	32.9424
RGS4	Mesoderm	30.981	33.438	34.56	34.684	33.287	32.871	35.284	30.327	34.383	35.487		34.6235	33.7306	33.7261		33.4426	32.6146	31.9023
HAND2	Mesoderm	29.978	33.009	36.745	40	32.995	34.413	40	28.346	33.109	34		34.6527	33.908	34.3709		38.1766	36.535	34.4473
HEY1	Mesoderm	29.522	29.503	30.853	30.932	31.075	30.916	32.411	29.651	29.269	30.384		31.0534	35.5803	29.2937		35.1544	31.7065	31.3038
ODAM	Mesoderm	32.525	37.142	35.735	40	40	34.977	37.833	32.092	35.34	40		40	40	37.0599		40	40	40
COLEC10	Mesoderm	31.953	32.619	34.613	32.824	33.282	32.97	33.775	30.95	33.717	33.158		35.1095	34.4958	33.9823		37.138	35.1971	35.577
FOXF1	Mesoderm	30.839	33.192	40	35.468	35.538	33.994	37.021	29.641	34.07	39.434		35.4194	35.1782	35.5415		37.0038	36.223	38.286
ESM1	Mesoderm	36.968	35.882	35.925	39.437	36.912	35.197	32.898	34.654	34.582	40		38.8184	36.9761	36.9628		40	40	40
ALOX15	Mesoderm	30.605	29.848	30.472	31.394	32.211	29.134	29.278	30.755	29.95	31.294		32.4226	31.9874	31.0339		39.9461	33.8942	35.255
SNAI2	Mesoderm	28.877	29.809	30.491	32.156	29.906	30.99	32.706	27.589	30.193	30.161		32.8676	35.5702	30.8188		33.6431	28.2704	29.5893
TBX3	Mesoderm	27.984	29.487	31.857	31.28	34.631	28.161	34.074	26.56	29.761	32.608		34.2118	37.1259	32.6599		30.7123	29.3913	30.283
CDX2	Mesoderm	28.513	31.97	34.654	33.963	28.457	30.327	37.872	28.178	32.332	33.122		34.2941	33.7958	33.6517		40	35.8528	35.7049
HAND1	Mesoderm	27.318	30.583	31.266	30.891	31.546	28.934	32.107	25.819	31.387	31.26		35.1731	33.9642	32.2338		34.6232	29.0872	30.362
PDGFRA	Mesoderm	30.775	30.165	29.713	31.464	32.282	29.168	32.206	30.492	30.805	33.712		35.3715	34.6417	32.9688		35.1487	31.6129	30.5286
FCN3	Mesoderm	31.549	32.202	34.209	32.909	32.887	32.271	32.738	31.761	32.351	31.998		32.3445	31.4316	32.6755		36.3508	36.2866	35.34
TM4SF1	Mesoderm	29.649	30.673	29.156	30.891	32.551	30.961	32.492	27.436	31.176	31.034		32.8091	34.2402	31.0664		40	40	35.4691
PRKCA	Other	26.756	26.149	26.815	26.768	25.998	26.015	26.425	26.536	26.195	26.048		27.0053	26.1026	26.3562		31.4663	28.8543	28.4463
AFP	Other	36.651	30.967	27.932	31.665	40	26.148	36.851	30.687	30.817	32.082		40	40	40		40	40	40
TRIM22	Self-renewal	24.226	24.423	25.983	25.375	26.091	24.965	26.214	27.307	24.43	24.374		26.4837	35.513	25.8284		37.5651	33.2981	31.2964
CXCL5	Self-renewal	26.717	25.97	23.333	26.08	29.027	25.32	25.096	27.216	25.275	28.954		31.1154	29.7023	28.0936		39.4431	33.7849	32.6877
NANOG	Self-renewal	22.322	22.247	21.975	23.419	22.953	22.842	23.432	23.96	22.639	24.015		24.9628	31.4363	23.6425		32.3709	25.9872	25.8147
SOX2	Self-renewal	21.91	21.311	22.014	23.3	22.506	22.023	22.969	23.407	21.61	23.015		24.0954	24.4462	23.3049		32.0593	28.4242	27.7849
DNMT3B	Self-renewal	18.889	19.734	19.291	20.248	20.582	19.414	20.028	19.908	19.866	20.622		19.9977	22.1108	19.9395		23.1343	22.0603	21.5769
IDO1	Self-renewal	25.014	24.536	26.31	24.839	27.515	23.971	25.296	26.059	24.979	23.773		27.291	33.2763	26.5314		37.6768	34.8021	33.9856
POU5F1	Self-renewal	27.029	26.983	28.297	26.297	28.603	26.748	27.988	27.59	27.396	27.445		28.3172	29.4909	26.2304		33.7318	28.6555	29.1122
LCK	Self-renewal	25.772	24.976	24.683	26.022	25.667	24.978	25.265	25.684	25.265	24.394		28.2372	28.5092	25.4173		36.2072	33.3136	30.4193
HESX1	Self-renewal	27.173	27.444	27.146	28.389	31.058	27.169	29.431	31.673	27.139	29.958		30.8993	32.337	27.9455		35	31.6371	31.5046

## Sheet: DevTox GLR-Endo seeding density
Plate	Row	Column	Treatment	Seeding Cell Count	Cell Count	Sox17 Well Mean Intensity	Sox17 Well Median Intensity	Sox17 Well Std	Sox17 Well MAD	Sox2 Well Mean Intensity	Sox2 Well Median	Sox2 Well Std	Sox2 Well MAD	Bra Well Mean Intensity	Bra Well Median Intensity	Bra Well Std	Bra Well MAD	%Sox17+ Cells	%Sox2+ Cells	%Bra+ Cells
2020-10-16 RUES2-GLR DE Day3	D	18	PluriControl	1400	343	336.63	312.165	97.9773	72.8579	288.911	256.33	115.074	43.3097	340.414	303.896	146.005	82.2176	7.87172	6.41399	10.7872
2020-10-16 RUES2-GLR DE Day3	D	19	PluriControl	1400	381	359.611	340.62	87.6995	71.0773	305.436	271.759	100.072	54.364	363.74	325.258	132.319	71.6081	6.82415	5.24934	12.336
2020-10-16 RUES2-GLR DE Day3	D	20	PluriControl	1400	244	367.028	358.288	100.507	87.9982	307.788	294.133	96.2682	70.144	380.951	337.988	170.794	98.6433	8.60655	5.7377	14.7541
2020-10-16 RUES2-GLR DE Day3	D	21	PluriControl	1400	228	378.065	349.479	115.98	84.2413	327.192	283.185	131.825	84.1324	400.501	336.111	189.699	96.4468	12.7193	11.8421	25
2020-10-16 RUES2-GLR DE Day3	D	22	PluriControl	1400	238	336.109	329.471	81.8173	67.1306	293.163	265.229	86.3491	67.4005	332.955	312.772	124.003	59.8185	4.20168	2.52101	9.24369
2020-10-16 RUES2-GLR DE Day3	E	18	PluriControl	1400	1370	353.697	343.204	74.8399	75.9039	277.145	270.099	52.9583	32.446	347.91	337.473	88.7893	76.1219	2.70073	0.875912	3.28467
2020-10-16 RUES2-GLR DE Day3	E	19	PluriControl	1400	1526	329.338	320.801	69.297	57.7554	268.264	260.696	67.5631	35.2095	328.994	316.795	95.5611	62.9438	2.16252	1.83486	3.53866
2020-10-16 RUES2-GLR DE Day3	E	20	PluriControl	1400	876	335.885	316.449	85.6641	62.2796	275.97	258.115	81.627	33.3281	334.611	308.736	118.275	63.078	4.68036	3.3105	6.05023
2020-10-16 RUES2-GLR DE Day3	E	21	PluriControl	1400	866	349.402	335.36	78.2451	56.3833	292.674	271.507	84.3343	39.6521	354.445	330.174	113.152	58.9074	4.15704	3.23326	6.00462
2020-10-16 RUES2-GLR DE Day3	E	22	PluriControl	1400	1158	341.336	324.306	85.9923	67.0439	276.566	256.754	86.2164	38.1866	336.721	312.916	116.445	65.3411	4.66321	3.88601	5.95855
2020-10-16 RUES2-GLR DE Day3	F	18	PluriControl	2100	1787	339.365	337.966	61.8743	60.2232	271.231	261.524	57.5267	29.9233	331.419	326.121	80.0282	59.3337	1.28707	1.23111	2.40627
2020-10-16 RUES2-GLR DE Day3	F	19	PluriControl	2100	2180	336.533	329.022	67.7716	63.1899	268.701	260.616	57.4745	33.3059	325.299	317.187	82.8562	60.2677	1.74312	1.14679	2.33945
2020-10-16 RUES2-GLR DE Day3	F	20	PluriControl	2100	1543	342.661	333.501	74.7774	68.9157	282.927	267.531	77.3422	35.3748	346.387	334.567	97.7848	72.9914	3.04601	2.65716	4.86066
2020-10-16 RUES2-GLR DE Day3	F	21	PluriControl	2100	1445	347.653	336.866	76.3595	65.5428	279.762	263.834	78.9028	35.8508	337.757	320.921	95.1876	60.622	2.97578	2.21453	3.87543
2020-10-16 RUES2-GLR DE Day3	F	22	PluriControl	2100	1601	338.341	327.94	75.7209	65.009	269.725	259.177	64.9015	32.3963	333.956	320.96	93.5748	67.6599	3.06059	1.87383	3.6852
2020-10-16 RUES2-GLR DE Day3	J	18	PluriControl	2800	3617	337.6	332.32	65.1295	59.4982	268.187	264.684	47.0504	31.784	332.675	326.052	78.1911	61.8852	1.43766	0.414708	2.18413
2020-10-16 RUES2-GLR DE Day3	J	19	PluriControl	2800	4286	345.488	341.972	60.4598	59.8859	270.725	268.644	53.9695	33.0019	341.483	336.408	73.3163	64.6465	0.886608	0.676622	1.35324
2020-10-16 RUES2-GLR DE Day3	J	20	PluriControl	2800	3543	345.561	344.662	58.1579	57.6954	272.372	271.365	44.6575	29.6817	355.457	355.185	71.5764	61.8971	0.733841	0.395145	1.18544
2020-10-16 RUES2-GLR DE Day3	J	21	PluriControl	2800	2580	337.935	329.212	69.624	61.3811	270.389	260.815	66.1633	31.4348	328.696	319.931	83.7473	61.7859	1.62791	1.20155	2.28682
2020-10-16 RUES2-GLR DE Day3	J	22	PluriControl	2800	3736	334.999	331.161	62.8994	61.8771	262.348	260.089	46.6954	33.1739	328.819	324.976	71.4506	65.5887	0.883298	0.347966	1.4454
2020-10-16 RUES2-GLR DE Day3	K	18	PluriControl	2800	3312	355.544	349.235	72.4047	72.7304	282.561	277.265	60.4849	35.2221	371.32	361.675	95.9272	84.543	2.38527	1.11715	5.61594
2020-10-16 RUES2-GLR DE Day3	K	19	PluriControl	2800	2552	351.792	342.997	73.5245	75.4013	278.323	269.836	64.6493	37.6736	351.363	342.408	87.9463	80.7557	2.3511	1.5674	3.25235
2020-10-16 RUES2-GLR DE Day3	K	20	PluriControl	2800	3149	345.134	343.291	59.6268	59.3781	270.711	268.228	48.4471	29.9633	359.684	355.793	176.038	63.8037	0.920927	0.508098	1.90537
2020-10-16 RUES2-GLR DE Day3	K	21	PluriControl	2800	3328	344.776	342.9	64.3427	62.5235	269.762	267.985	50.6254	33.9308	338	339.303	73.3671	65.5057	0.871394	0.63101	0.841346
2020-10-16 RUES2-GLR DE Day3	K	22	PluriControl	2800	2729	334.987	329.661	63.9734	58.7747	271.25	266.834	55.3577	32.7121	348.439	341.749	85.0583	66.0039	1.35581	0.95273	2.56504
2020-10-16 RUES2-GLR DE Day3	L	18	PluriControl	3500	3741	348.266	342.544	64.9668	57.6539	286.881	279.238	63.1373	34.122	352.409	344.011	85.13	61.2862	1.68404	1.36327	2.64635
2020-10-16 RUES2-GLR DE Day3	L	19	PluriControl	3500	3850	344.779	339.483	64.0468	55.6768	278.616	272.31	56.1222	35.7766	350.213	343.622	82.1733	62.1069	1.14286	0.701299	2.12987
2020-10-16 RUES2-GLR DE Day3	L	20	PluriControl	3500	4179	349.605	347.823	61.9655	54.2587	282.581	279.396	58.859	32.0167	378.175	377.319	83.3892	63.267	1.24432	0.86145	3.70902
2020-10-16 RUES2-GLR DE Day3	L	21	PluriControl	3500	3544	353.271	349.293	64.2482	62.4189	281.361	277.137	54.6565	37.0391	364.329	358.332	77.8511	72.3828	1.38262	0.874718	2.8781
2020-10-16 RUES2-GLR DE Day3	L	22	PluriControl	3500	3557	341.77	336.506	67.6754	61.4879	280.266	272.351	65.0714	41.796	352.818	343.608	90.9507	72.7364	1.57436	1.46191	2.8957
2020-10-16 RUES2-GLR DE Day3	M	18	PluriControl	3500	3366	352.825	349.63	64.629	66.7481	291.494	286.628	54.7637	38.6225	364.058	356.858	82.113	74.0247	1.45573	1.0101	3.62448
2020-10-16 RUES2-GLR DE Day3	M	19	PluriControl	3500	4348	359.783	357.875	64.8696	65.9431	293.539	286.19	65.8594	43.607	368.677	363.906	81.1893	74.7646	1.40294	0.827967	4.00184
2020-10-16 RUES2-GLR DE Day3	M	20	PluriControl	3500	4358	353.2	350.604	61.6789	60.6324	288.897	285.263	51.6466	36.7514	371.322	369.337	73.5148	68.0439	0.917852	0.711335	2.59293
2020-10-16 RUES2-GLR DE Day3	M	21	PluriControl	3500	3850	348.279	346.646	63.4402	60.7421	286.734	277.17	60.8655	42.0769	362.302	353.942	87.066	73.0351	1.27273	0.987013	3.76623
2020-10-16 RUES2-GLR DE Day3	M	22	PluriControl	3500	3326	360.584	358.278	71.6899	69.1359	296.701	288.123	65.1267	51.7531	379.394	371.966	95.8196	86.7795	2.49549	0.751654	11.2748
2020-10-16 RUES2-GLR DE Day3	D	3	DEControl	1400	349	898.442	587.122	726.681	468.853	276.632	263.26	68.9039	50.8784	237.508	232.563	80.9012	33.6713	54.7278	1.7192	0.573066
2020-10-16 RUES2-GLR DE Day3	D	4	DEControl	1400	360	868.07	585.601	696.092	471.182	283.199	268.336	73.9984	49.7397	234.875	236.623	36.6518	35.2636	55	2.5	0
2020-10-16 RUES2-GLR DE Day3	D	5	DEControl	1400	353	951.501	684.587	743.24	596.588	282.083	263.265	67.3791	50.4588	240.226	239.283	44.3931	32.7062	57.2238	1.983	0.566572
2020-10-16 RUES2-GLR DE Day3	D	6	DEControl	1400	365	1041.72	801.624	794.46	723.71	290.572	267.227	84.0922	53.7398	245.115	239.425	65.4497	34.5045	61.3698	3.56164	1.09589
2020-10-16 RUES2-GLR DE Day3	D	7	DEControl	1400	224	1002.69	887.317	715.033	799.691	286.077	269.372	65.3722	53.4166	245.484	241.345	43.7643	31.4756	63.8393	0.892857	0.446428
2020-10-16 RUES2-GLR DE Day3	D	8	DMSOControl	1400	241	793.104	404.635	706.832	228.924	298.46	279.808	84.7493	69.4835	239.664	236.72	37.8272	41.3897	44.8133	3.3195	0
2020-10-16 RUES2-GLR DE Day3	D	9	DMSOControl	1400	464	888.764	615.524	685.679	512.286	293.341	269.279	82.2246	46.0496	246.27	240.782	54.7776	28.2406	54.7414	2.80172	0.862069
2020-10-16 RUES2-GLR DE Day3	D	10	DMSOControl	1400	347	815.34	443.662	673.289	269.781	301.827	274.61	200.711	53.3217	253.149	238.874	227.32	35.7588	47.5504	1.44092	0.864553
2020-10-16 RUES2-GLR DE Day3	D	11	DMSOControl	1400	238	692.103	453.945	514.601	267.572	285.29	273.563	59.3075	46.0303	245.107	240.656	43.6562	33.4423	46.6386	0	0.420168
2020-10-16 RUES2-GLR DE Day3	D	12	DMSOControl	1400	64	634.599	370.82	539.08	189.977	260.658	252.611	59.3321	38.4171	257.795	241.036	98.8148	40.1258	40.6249	1.5625	3.125
2020-10-16 RUES2-GLR DE Day3	D	13	SB431542	1400	260	318.067	297.536	69.2565	49.9488	272.012	262.943	51.6472	33.5661	309.718	287.848	92.9769	52.3817	2.30769	0.76923	3.46154
2020-10-16 RUES2-GLR DE Day3	D	14	SB431542	1400	70	308.909	298.928	77.4327	76.9595	263.635	254.827	55.1157	33.2658	296.771	276.644	83.9865	57.0356	2.85714	1.42857	4.28571
2020-10-16 RUES2-GLR DE Day3	D	15	SB431542	1400	165	319.797	315.28	65.2514	75.3368	265.284	257.065	51.2241	37.197	302.934	296.897	76.5885	63.7058	1.21212	1.21212	1.81818
2020-10-16 RUES2-GLR DE Day3	D	16	SB431542	1400	165	310.047	301.526	65.349	63.1973	269.105	252.305	71.4978	49.4581	431.072	269.438	1270.52	54.0808	1.21212	2.42424	3.63636
2020-10-16 RUES2-GLR DE Day3	D	17	SB431542	1400	169	327.507	325.278	63.9362	67.9401	261.991	260.382	43.3143	36.3207	313.645	311.479	64.2617	64.2262	0	0	0.591716
2020-10-16 RUES2-GLR DE Day3	E	3	DEControl	1400	1427	1465.11	1242.73	1110.34	1210.31	302.347	280.329	86.2587	56.3255	233.614	230.866	47.4061	33.5082	74.2817	3.43378	0.49054
2020-10-16 RUES2-GLR DE Day3	E	4	DEControl	1400	1448	1536.75	1267.9	1296.49	1216.17	322.522	295.385	105.22	63.1425	251.942	242.639	71.1529	36.8293	73.4116	6.07735	1.31215
2020-10-16 RUES2-GLR DE Day3	E	5	DEControl	1400	2062	1978.89	1743.94	1520.93	1500.34	319.107	297.464	86.9113	61.2595	245.183	243.786	39.6789	33.0412	79.5344	4.17071	0.242483
2020-10-16 RUES2-GLR DE Day3	E	6	DEControl	1400	1460	1295.75	1122.93	1007.65	1121.51	314.966	291.944	93.7154	65.2922	245.827	244.313	53.1542	33.2139	67.9452	3.69863	0.821918
2020-10-16 RUES2-GLR DE Day3	E	7	DEControl	1400	1126	1281	1026.65	1020.32	1016.3	316.615	292.327	96.1561	64.7355	245.58	241.588	53.3798	33.698	66.0746	5.15098	0.799289
2020-10-16 RUES2-GLR DE Day3	E	8	DMSOControl	1400	1706	1271.89	1082.72	1012.37	1040.56	333.81	304.298	121.561	64.4546	249.07	243.35	174.327	34.1235	68.9332	6.3306	0.468933
2020-10-16 RUES2-GLR DE Day3	E	9	DMSOControl	1400	1539	1079.68	853.801	833.496	780.47	314.107	291.197	86.4369	57.5086	243.92	241.404	47.4982	32.2406	62.5731	4.74334	0.454841
2020-10-16 RUES2-GLR DE Day3	E	10	DMSOControl	1400	1990	1464.34	1249.34	1159.41	1239.12	347.491	315.354	110.763	69.4472	253.453	252.21	46.2417	33.2095	71.5578	8.84422	0.502513
2020-10-16 RUES2-GLR DE Day3	E	11	DMSOControl	1400	1279	1159.89	972.001	882.501	871.065	319.825	294.741	91.9325	52.0867	254.157	249.602	64.7215	34.9923	68.8819	5.39484	0.938233
2020-10-16 RUES2-GLR DE Day3	E	12	DMSOControl	1400	1360	1388.21	1044.18	1259.17	1041.25	320.358	294.757	95.2408	59.3248	244.518	242.689	43.2995	32.9404	66.9118	5.66176	0.147059
2020-10-16 RUES2-GLR DE Day3	E	13	SB431542	1400	1259	348.933	345.954	60.9668	57.6924	273.682	270.55	50.7755	26.2153	336.213	332.711	65.8018	55.3929	1.11199	0.635425	1.03257
2020-10-16 RUES2-GLR DE Day3	E	14	SB431542	1400	816	331.695	324.6	63.9377	59.0223	269.051	264.175	48.1675	34.1176	319.291	314.462	66.1354	63.6717	1.34804	0.490196	0.490196
2020-10-16 RUES2-GLR DE Day3	E	15	SB431542	1400	1189	326.421	321.375	62.1158	55.0919	273.007	266.699	57.13	33.2088	315.463	308.253	71.9308	51.4833	1.26156	1.00925	2.10261
2020-10-16 RUES2-GLR DE Day3	E	16	SB431542	1400	1034	334.77	326.811	67.2387	64.0446	274.57	271.265	48.7163	32.34	323.982	317.527	74.2403	62.0809	1.25725	0.483559	1.25725
2020-10-16 RUES2-GLR DE Day3	E	17	SB431542	1400	657	339.084	331.095	67.6901	69.8201	273.843	269.091	43.8639	29.8818	320.038	311.661	65.3928	61.4226	1.67428	0.456621	1.67428
2020-10-16 RUES2-GLR DE Day3	F	3	DEControl	2100	975	996.115	705.79	815.985	605.171	302.417	276.721	84.7725	54.5701	235.84	231.997	51.9178	30.6661	58.8718	4.41026	0.820513
2020-10-16 RUES2-GLR DE Day3	F	4	DEControl	2100	2652	2192.03	1821.72	1701.49	1636.15	343.217	318.054	103.14	73.385	250.801	249.987	53.1178	36.1258	82.4284	8.10709	0.339367
2020-10-16 RUES2-GLR DE Day3	F	5	DEControl	2100	2886	2634.61	2294.47	1937.36	1958.97	337.086	309.723	106.506	58.7369	253.469	253.949	42.4698	32.7506	84.6154	6.06376	0.31185
2020-10-16 RUES2-GLR DE Day3	F	6	DEControl	2100	2797	1931.02	1678.18	1478.51	1586.25	334.554	309.876	96.4993	65.6436	254.544	252.469	55.5884	37.959	78.4054	6.36396	0.464784
2020-10-16 RUES2-GLR DE Day3	F	7	DEControl	2100	3624	2047.88	1821.43	1460.27	1561.89	340.496	317.81	87.9247	55.5034	260.333	260.93	41.7416	36.4594	81.8157	5.8223	0.220751
2020-10-16 RUES2-GLR DE Day3	F	8	DMSOControl	2100	3247	1792.89	1546.75	1410.16	1507.37	337.458	313.575	95.601	64.0187	250.702	251.381	40.1608	32.1027	75.6083	6.5291	0.338774
2020-10-16 RUES2-GLR DE Day3	F	9	DMSOControl	2100	3092	2089.85	1808.59	1638.91	1780.11	351.514	322.063	112.824	68.8616	252.376	252.567	39.0633	33.1539	77.7167	8.5705	0.129366
2020-10-16 RUES2-GLR DE Day3	F	10	DMSOControl	2100	2636	1291.38	1109.47	947.028	1019.72	326.961	304.3	87.5034	58.9986	246.098	244.897	40.0867	31.3177	71.9651	5.19727	0.189681
2020-10-16 RUES2-GLR DE Day3	F	11	DMSOControl	2100	2974	1851.45	1605.49	1397.23	1462.37	348.666	320.72	101.853	65.1981	259.389	259.847	41.6207	34.9441	79.0854	7.76732	0.235373
2020-10-16 RUES2-GLR DE Day3	F	12	DMSOControl	2100	2607	1653.12	1383.61	1290.9	1312.91	334.513	307.046	99.0697	60.9052	252.356	250.045	47.9299	33.4578	76.0644	6.67434	0.421941
2020-10-16 RUES2-GLR DE Day3	F	13	SB431542	2100	1284	334.614	323.752	66.0502	57.5708	274.619	270.118	50.4174	34.6543	354.556	331.569	103.88	71.0862	1.40187	0.778816	7.00935
2020-10-16 RUES2-GLR DE Day3	F	14	SB431542	2100	1193	347.616	340.057	69.5742	67.356	281.189	274.724	55.6747	37.7485	338.779	332.738	82.1195	67.9831	2.09556	0.922045	2.34702
2020-10-16 RUES2-GLR DE Day3	F	15	SB431542	2100	1556	331.808	330.738	60.4999	58.0134	272.38	270.856	42.7754	29.2991	323.591	322.633	72.0345	59.3611	0.899743	0.449871	1.54242
2020-10-16 RUES2-GLR DE Day3	F	16	SB431542	2100	1748	348.684	347.4	69.1566	68.4961	284.534	278.925	66.0229	31.3963	334.571	330.659	77.4096	62.9586	1.71625	0.97254	1.71625
2020-10-16 RUES2-GLR DE Day3	F	17	SB431542	2100	1314	328.804	325.572	56.7459	58.1913	271.241	265.459	53.4359	29.526	309.023	307.878	55.7548	54.2698	0.456621	0.837138	0.380517
2020-10-16 RUES2-GLR DE Day3	J	3	DEControl	2800	4334	2449.62	2276.17	1704.36	1811.44	346.58	320.159	99.5721	59.0564	256.74	257.67	42.2433	34.5209	83.2949	7.15275	0.184587
2020-10-16 RUES2-GLR DE Day3	J	4	DEControl	2800	4108	2210.68	2012.81	1541.13	1630.06	336.467	314.397	91.2264	53.109	258.528	259.784	40.631	33.509	82.668	5.6962	0.316456
2020-10-16 RUES2-GLR DE Day3	J	5	DEControl	2800	3793	2435.7	2183.74	1892.24	2143.18	342.426	316.759	102.435	62.3152	254.79	255.817	36.5848	32.6202	78.0912	6.90746	0.105457
2020-10-16 RUES2-GLR DE Day3	J	6	DEControl	2800	4431	2181.34	1996.5	1471.46	1535.83	329.399	310.866	82.6884	55.9489	257.191	257.939	38.3709	34.6068	84.789	4.2654	0.180546
2020-10-16 RUES2-GLR DE Day3	J	7	DEControl	2800	4673	2395.98	2250.31	1591.1	1795.73	355.565	326.46	112.734	58.023	265.58	267.486	41.9885	36.4245	84.0573	8.68821	0.299593
2020-10-16 RUES2-GLR DE Day3	J	8	DMSOControl	2800	4020	2264.56	2046.77	1625.92	1748.08	337.052	313.178	98.3167	53.8377	256.368	256.683	40.4221	31.9159	81.3433	6.04478	0.248756
2020-10-16 RUES2-GLR DE Day3	J	9	DMSOControl	2800	3857	2228.59	2031.29	1647.19	1925.42	346.459	321.957	99.3583	59.2195	259.743	260.802	39.1499	33.5646	79.1548	6.76692	0.181488
2020-10-16 RUES2-GLR DE Day3	J	10	DMSOControl	2800	4328	2135.8	1852.27	1585.83	1630.38	352.32	326.351	98.1123	61.7392	262.632	264.199	40.3779	36.0672	81.2616	7.67098	0.115527
2020-10-16 RUES2-GLR DE Day3	J	11	DMSOControl	2800	3533	2064.75	1781.92	1576.12	1630.95	351.816	328.133	97.2718	58.837	257.916	257.872	42.166	31.8581	79.7056	7.10444	0.283046
2020-10-16 RUES2-GLR DE Day3	J	12	DMSOControl	2800	4032	2301.61	1990.45	1723.92	1913.82	353.116	329.411	98.3598	59.7503	265.195	267.005	40.1725	35.9634	81.0268	7.26686	0.173611
2020-10-16 RUES2-GLR DE Day3	J	13	SB431542	2800	1516	324.835	322.663	57.0212	52.7198	265.167	261.714	45.5546	29.9137	315.186	311.745	63.584	55.5019	0.593668	0.263852	0.659631
2020-10-16 RUES2-GLR DE Day3	J	14	SB431542	2800	2778	342.091	337.808	57.0642	56.5056	273.955	272.919	38.9128	31.6231	333.637	330.81	62.3783	59.4226	0.575954	0.323974	0.863931
2020-10-16 RUES2-GLR DE Day3	J	15	SB431542	2800	2227	344.309	341.46	57.7944	56.9066	276.795	273.074	49.5955	35.3066	344.067	340.29	69.2573	62.2751	0.942973	0.538841	1.43691
2020-10-16 RUES2-GLR DE Day3	J	16	SB431542	2800	2114	359.657	356.777	54.524	49.8361	275.086	270.696	45.0425	31.2213	349.642	346.586	58.7464	52.7435	1.41911	0.331126	1.13529
2020-10-16 RUES2-GLR DE Day3	J	17	SB431542	2800	2048	338.827	338.153	57.8596	51.3573	274.576	270.543	56.0259	30.8366	335.108	331.936	71.2947	53.0252	0.732422	0.634766	1.41602
2020-10-16 RUES2-GLR DE Day3	K	3	DEControl	2800	4289	2404.96	2211.63	1779.96	2111.52	353.424	320.122	117.232	61.009	257.406	259.756	35.1879	32.7195	79.3425	8.41688	0.116577
2020-10-16 RUES2-GLR DE Day3	K	4	DEControl	2800	3902	1894.04	1588.88	1521.6	1724.35	360.311	319.864	131.124	69.8764	256.328	255.278	44.6771	33.6483	73.4751	11.5069	0.230651
2020-10-16 RUES2-GLR DE Day3	K	5	DEControl	2800	4576	2266.98	2048.35	1722.7	2088.93	351.346	323.126	108.077	61.1276	262.366	263.837	37.4728	33.6128	77.7972	7.9764	0.131119
2020-10-16 RUES2-GLR DE Day3	K	6	DEControl	2800	4467	2413.49	2183.1	1730.17	1887.79	341.403	317.459	96.3051	56.1727	260.015	260.68	37.8529	35.0027	83.5012	5.91001	0.156705
2020-10-16 RUES2-GLR DE Day3	K	7	DEControl	2800	4969	2271.71	2111.05	1559.48	1793.84	343.453	314.367	108.601	55.8021	259.741	261.687	38.2219	30.1516	82.9543	7.40592	0.221373
2020-10-16 RUES2-GLR DE Day3	K	8	DMSOControl	2800	4488	2327.39	2093.61	1753.07	2031.72	361.491	331.966	110.35	67.4272	263.993	266.416	36.06	33.3481	78.9884	9.4697	0.0668449
2020-10-16 RUES2-GLR DE Day3	K	9	DMSOControl	2800	3363	2142.7	1839.76	1650.2	1837.17	349.73	325.066	101.523	59.301	262.488	263.688	39.6	34.1591	78.5608	6.98781	0.267618
2020-10-16 RUES2-GLR DE Day3	K	10	DMSOControl	2800	5150	2605.88	2421.28	1917.32	2279.18	366.591	337.831	114.595	59.2225	274.178	276.565	41.0935	35.1006	81.6699	8.62136	0.252427
2020-10-16 RUES2-GLR DE Day3	K	11	DMSOControl	2800	4531	2155.12	1929.11	1545.98	1737.34	352.901	330.227	99.489	58.3092	265.167	266.209	39.7137	35.0205	82.0349	7.7687	0.198632
2020-10-16 RUES2-GLR DE Day3	K	12	DMSOControl	2800	4272	2015.39	1805.04	1483.15	1682.74	357.463	330.567	107.243	68.247	265.753	263.463	53.3136	35.6973	79.2369	9.57397	0.725655
2020-10-16 RUES2-GLR DE Day3	K	13	SB431542	2800	2568	359.484	360.043	56.3346	56.8577	285.933	286.856	41.3559	32.3526	363.015	366.182	63.9976	65.6473	0.700935	0.311526	1.36293
2020-10-16 RUES2-GLR DE Day3	K	14	SB431542	2800	2094	341.861	335.938	61.7946	63.3003	274.871	273.274	44.137	36.0894	334.846	328.803	73.2118	65.7652	1.24164	0.191022	1.81471
2020-10-16 RUES2-GLR DE Day3	K	15	SB431542	2800	2959	358.142	356.912	60.486	62.6473	282.253	280.836	44.6278	34.426	357.088	354.421	69.4308	65.4509	0.946266	0.270362	1.52078
2020-10-16 RUES2-GLR DE Day3	K	16	SB431542	2800	2889	350.517	350.151	55.4422	55.1779	278.782	277.182	50.487	32.675	341.728	343.353	62.5921	56.5256	0.519211	0.553825	1.17688
2020-10-16 RUES2-GLR DE Day3	K	17	SB431542	2800	2861	351.234	348.359	65.7438	59.4078	280.191	278.038	47.8309	30.9582	367.207	365.526	89.8994	70.4457	1.01363	0.594198	3.63509
2020-10-16 RUES2-GLR DE Day3	L	3	DEControl	3500	4165	2384.53	2199.3	1726.7	1991.55	349.701	323.528	102.909	60.4664	263.797	263.482	44.9985	34.2199	81.5846	7.56303	0.360144
2020-10-16 RUES2-GLR DE Day3	L	4	DEControl	3500	4687	2007.4	1733.08	1508.58	1714.26	361.552	330.359	119.57	63.5457	261.775	262.538	42.4313	35.4875	79.1764	9.15298	0.298699
2020-10-16 RUES2-GLR DE Day3	L	5	DEControl	3500	4586	2467.23	2155.08	1851.15	2147.42	362.672	332.036	112.73	62.6732	265.79	267.231	38.471	35.7959	80.9638	9.72525	0.196249
2020-10-16 RUES2-GLR DE Day3	L	6	DEControl	3500	5100	1840.65	1558.18	1415.02	1564.34	359.08	330.555	110.388	57.8236	269.336	269.377	44.6215	35.8396	77.0588	8.62745	0.392157
2020-10-16 RUES2-GLR DE Day3	L	7	DEControl	3500	5157	2370.42	2179.11	1713.91	2019.01	366.27	336.292	114.736	66.6132	267.096	269.649	37.9485	34.7566	81.0743	9.34652	0.155129
2020-10-16 RUES2-GLR DE Day3	L	8	DMSOControl	3500	5825	2059.2	1804.59	1533.76	1699.67	353.515	327.265	108.783	56.0601	272.636	274.459	41.3806	32.6113	80.9099	7.29614	0.291845
2020-10-16 RUES2-GLR DE Day3	L	9	DMSOControl	3500	4998	2494.08	2310.94	1795.65	2102.98	353.977	329.868	100.841	57.2625	268.966	269.606	45.7475	32.8663	81.7727	6.98279	0.260104
2020-10-16 RUES2-GLR DE Day3	L	10	DMSOControl	3500	5212	2091.88	1811.77	1583.76	1786.7	364.049	336.377	109.322	57.4493	275.209	276.49	47.48	34.2911	79.2594	8.49962	0.345357
2020-10-16 RUES2-GLR DE Day3	L	11	DMSOControl	3500	4811	2097.35	1777.38	1632.7	1883.6	376.089	338.824	125.457	63.9772	270.851	273.114	36.736	31.6639	77.1357	11.4529	0.1455
2020-10-16 RUES2-GLR DE Day3	L	12	DMSOControl	3500	5069	2202.17	1916.6	1668.18	1962.67	370.819	335.933	122.393	63.7414	300.207	273.876	400.292	32.5446	79.3648	10.6727	1.12448
2020-10-16 RUES2-GLR DE Day3	L	13	SB431542	3500	2931	357.687	355.855	64.0123	64.5242	289.689	287.075	48.1877	36.5802	369.655	366.755	74.6416	72.3716	1.02354	0.648243	3.10474
2020-10-16 RUES2-GLR DE Day3	L	14	SB431542	3500	3306	359.265	356.204	56.8334	51.3039	290.382	287.272	53.3738	33.4919	366.29	364.68	71.8065	58.1617	1.05868	0.635209	2.41984
2020-10-16 RUES2-GLR DE Day3	L	15	SB431542	3500	3054	348.84	343.591	57.8401	48.5159	281.742	279.212	46.9724	37.6039	355.347	349.881	69.3274	56.324	1.17878	0.327439	2.29208
2020-10-16 RUES2-GLR DE Day3	L	16	SB431542	3500	3120	348.553	345.808	52.9634	48.8153	281.88	279.408	46.0262	32.4163	354.417	350.066	66.5977	55.2965	0.576923	0.448718	1.41026
2020-10-16 RUES2-GLR DE Day3	L	17	SB431542	3500	3560	358.604	357.346	68.4285	56.493	285.086	283.733	43.7897	33.423	359.721	358.598	64.2429	57.4648	1.01124	0.421348	1.82584
2020-10-16 RUES2-GLR DE Day3	M	3	DEControl	3500	5329	2084.23	1683.68	1720.18	1818.16	376.487	341.669	123.373	65.8497	270.711	273.959	39.2936	31.8952	76.2995	11.109	0.243948
2020-10-16 RUES2-GLR DE Day3	M	4	DEControl	3500	5574	1668.22	1199.68	1431.85	1205.79	371.771	342.454	122.146	66.9179	269.915	270.825	35.3214	35.5313	72.587	10.0287	0.0538213
2020-10-16 RUES2-GLR DE Day3	M	5	DEControl	3500	5686	2047.52	1693.89	1643.19	1801.77	374.572	338.385	127.015	62.3574	269.481	272.2	37.7232	32.5586	76.961	10.9391	0.123109
2020-10-16 RUES2-GLR DE Day3	M	6	DEControl	3500	5447	1867.13	1594.51	1421.51	1580.95	359.14	331.411	110.34	57.4033	266.49	268.541	35.322	33.4667	78.0246	8.7204	0.110152
2020-10-16 RUES2-GLR DE Day3	M	7	DEControl	3500	5673	1705.97	1326.59	1386.72	1346.99	371.166	335.818	126.11	66.7644	270.872	274.245	36.4169	34.0197	74.3874	11.1405	0.0705094
2020-10-16 RUES2-GLR DE Day3	M	8	DMSOControl	3500	5608	1790.27	1437.71	1430.59	1443.05	370.56	339.231	118.224	59.7592	272.241	274.354	35.074	34.6691	76.48	10.0036	0.0891583
2020-10-16 RUES2-GLR DE Day3	M	9	DMSOControl	3500	5342	2023.82	1773.5	1484.77	1700.18	364.504	340.8	105.191	61.2803	275.283	276.476	47.226	34.9308	80.307	8.01198	0.355672
2020-10-16 RUES2-GLR DE Day3	M	10	DMSOControl	3500	4899	1956.98	1704.39	1449.73	1632.95	366.598	340.41	107.118	59.9652	271.488	272.762	40.6882	35.3897	79.9347	8.38947	0.183711
2020-10-16 RUES2-GLR DE Day3	M	11	DMSOControl	3500	4982	1735.42	1339.04	1448.85	1388.73	382.024	346.945	124.129	65.2396	271.809	273.291	42.9596	35.2407	72.9827	12.4247	0.281012
2020-10-16 RUES2-GLR DE Day3	M	12	DMSOControl	3500	5192	1678.86	1290.38	1395.7	1286.29	364.636	338.481	110.828	59.8311	273.827	275.81	42.6967	34.4393	73.7866	8.99461	0.346687
2020-10-16 RUES2-GLR DE Day3	M	13	SB431542	3500	2839	355.353	351.261	87.981	54.6056	293.524	288.646	52.542	41.9798	366.729	360.792	74.677	64.6562	1.09193	0.493131	3.48714
2020-10-16 RUES2-GLR DE Day3	M	14	SB431542	3500	3183	362.873	361.354	62.603	61.4286	307.783	300.48	67.4479	47.335	382.407	374.845	84.4774	77.2079	1.22526	1.16243	7.72856
2020-10-16 RUES2-GLR DE Day3	M	15	SB431542	3500	3145	360.007	355.798	63.9049	61.6702	298.438	289.96	62.3846	40.982	374.955	367.091	81.4185	71.8764	1.01749	0.890302	6.42289
2020-10-16 RUES2-GLR DE Day3	M	16	SB431542	3500	2718	365.388	363.752	63.6801	66.3093	298.497	293.145	51.8715	44.8501	399.717	394.555	89.9051	84.2154	0.919794	0.588668	13.0979
2020-10-16 RUES2-GLR DE Day3	M	17	SB431542	3500	3937	371.215	372.39	55.6331	53.5189	298.735	293.524	54.1012	42.7256	394.824	396.497	74.2244	66.8074	1.0414	0.482601	5.63881
2020-10-23 RUES2-GLR p61 Day3 DE	C	18	PluriControl	1400	380	377.725	324.312	258.561	40.6981	749.662	712.972	318.536	314.941	348.04	270.404	285.853	56.8036	7.36842	76.0526	7.89473
2020-10-23 RUES2-GLR p61 Day3 DE	C	19	PluriControl	1400	1038	419.01	362.542	190.138	55.6116	832.43	798.893	359.941	395.707	347.343	276.213	214.012	43.3453	15.896	78.8054	14.5472
2020-10-23 RUES2-GLR p61 Day3 DE	C	20	PluriControl	1400	994	378.87	341.548	145.904	41.5832	828.25	804.285	342.869	379.508	301.457	255.482	172.468	26.9255	9.15493	80.1811	8.75251
2020-10-23 RUES2-GLR p61 Day3 DE	C	21	PluriControl	1400	717	401.929	331.467	194.137	42.8041	803.844	788.955	351.074	395.518	341.247	256.348	223.586	27.1212	14.7838	75.7322	15.3417
2020-10-23 RUES2-GLR p61 Day3 DE	C	22	PluriControl	1400	437	500.734	362.274	270.822	97.3253	876.903	852.726	401.547	442.306	445.54	278.151	304.352	77.0626	32.0366	77.3455	31.5789
2020-10-23 RUES2-GLR p61 Day3 DE	D	18	PluriControl	1400	1140	416.849	354.361	202.928	52.7531	855.48	828.562	358.197	363.069	348.68	280.982	210.562	34.681	14.6491	83.3333	13.2456
2020-10-23 RUES2-GLR p61 Day3 DE	D	19	PluriControl	1400	829	368.244	344.142	117.387	40.1977	753.812	729.406	323.119	362.241	293.3	265.072	139.044	30.291	7.9614	72.7382	7.35826
2020-10-23 RUES2-GLR p61 Day3 DE	D	20	PluriControl	1400	450	336.758	318.267	108.164	44.6374	761.586	726.931	314.323	317.346	271.673	251.57	118.216	27.2695	4	78	3.77778
2020-10-23 RUES2-GLR p61 Day3 DE	D	21	PluriControl	1400	748	405.488	342.802	181.26	38.8404	840.763	833.065	347.67	406.732	339.649	262.183	218.566	27.4533	14.4385	79.4118	14.7059
2020-10-23 RUES2-GLR p61 Day3 DE	D	22	PluriControl	1400	301	453.556	333.743	242.972	75.1886	774.774	736.753	348.366	342.356	422.923	265.36	295.689	77.9788	28.5714	75.4153	29.5681
2020-10-23 RUES2-GLR p61 Day3 DE	E	18	PluriControl	1400	705	364.549	342.708	109.189	39.9605	756.215	761.314	284.09	312.077	291.063	263.535	136.877	29.867	5.8156	78.0142	6.52482
2020-10-23 RUES2-GLR p61 Day3 DE	E	19	PluriControl	1400	720	391.013	344.509	159.483	46.5307	744.06	740.984	303.193	327.7	323.827	265.458	188.073	39.8115	13.0556	75.8333	12.5
2020-10-23 RUES2-GLR p61 Day3 DE	E	20	PluriControl	1400	489	363.322	326.79	134.815	35.1643	747.589	741.348	327.823	325.428	308.374	258.548	176.577	23.0114	9.20245	76.6871	10.0204
2020-10-23 RUES2-GLR p61 Day3 DE	E	21	PluriControl	1400	294	380.715	311.274	182.273	41.8345	741.603	754.28	298.663	330.538	328.378	239.269	221.136	43.6552	17.6871	73.4694	16.6667
2020-10-23 RUES2-GLR p61 Day3 DE	E	22	PluriControl	1400	294	428.378	335.24	233.086	73.6318	843.408	835.875	365.68	385.21	377.049	257.038	271.948	59.5657	24.1497	79.9319	23.4694
2020-10-23 RUES2-GLR p61 Day3 DE	F	18	PluriControl	2100	1514	354.62	349.764	75.9905	43.6307	844.515	845.91	322.595	373.796	273.88	267.442	79.4765	31.7061	2.11361	82.893	2.17966
2020-10-23 RUES2-GLR p61 Day3 DE	F	19	PluriControl	2100	1362	340.241	332.875	67.9235	35.6825	784.845	762.396	294.027	352.139	268.101	263.863	70.3291	26.4592	1.46843	79.5154	1.39501
2020-10-23 RUES2-GLR p61 Day3 DE	F	20	PluriControl	2100	1315	362.462	323.993	151.56	50.8932	800.469	782.415	309.779	340.61	290.982	253.436	156.772	37.6195	8.59316	81.597	7.22433
2020-10-23 RUES2-GLR p61 Day3 DE	F	21	PluriControl	2100	1575	336.604	329.188	86.4672	50.3002	803.006	778.225	308.625	341.094	266.38	254.11	96.7526	40.0865	3.2381	81.1429	3.11111
2020-10-23 RUES2-GLR p61 Day3 DE	F	22	PluriControl	2100	1006	361.742	338.813	111.899	39.6032	820.79	795	323.182	363.852	290.887	262.574	129.808	26.7276	6.85885	81.8091	6.36183
2020-10-23 RUES2-GLR p61 Day3 DE	G	18	PluriControl	2100	1302	360.527	349.402	97.6374	49.0199	972.048	967.692	367.314	382.761	285.713	272.909	105.553	36.9983	3.76344	88.9401	3.45622
2020-10-23 RUES2-GLR p61 Day3 DE	G	19	PluriControl	2100	920	348.52	331.601	102.222	49.2898	796.625	781.643	316.84	368.65	283.492	261.858	229.24	38.8167	5.1087	78.4783	4.56522
2020-10-23 RUES2-GLR p61 Day3 DE	G	20	PluriControl	2100	810	337.59	330.213	70.0869	36.5142	764.171	747.916	312.212	362.46	260.978	255.941	80.031	25.7987	1.97531	75.9259	2.09877
2020-10-23 RUES2-GLR p61 Day3 DE	G	21	PluriControl	2100	1391	327.945	320.983	70.892	32.1235	844.943	852.397	310.371	341.146	260.64	252.771	81.9753	24.8202	2.15672	84.5435	1.94105
2020-10-23 RUES2-GLR p61 Day3 DE	G	22	PluriControl	2100	938	341.107	331.342	78.2947	29.7825	803.319	786.604	313.328	351.167	271.034	261.536	90.9585	23.1048	2.77185	79.9573	2.77185
2020-10-23 RUES2-GLR p61 Day3 DE	H	18	PluriControl	2100	678	327.865	323.792	60.0719	35.9909	786.286	767.986	303.938	333.767	253.706	252.149	63.2234	32.228	2.0649	79.941	1.47493
2020-10-23 RUES2-GLR p61 Day3 DE	H	19	PluriControl	2100	623	342.923	331.736	95.3789	38.1873	748.677	761.17	290.292	321.92	271.035	258.453	110.403	23.8254	4.81541	75.6019	4.49438
2020-10-23 RUES2-GLR p61 Day3 DE	H	20	PluriControl	2100	923	332.563	318.027	99.5055	29.7899	911.258	916.664	332.021	340.829	264.196	250.572	107.027	17.4873	3.25027	87.2156	3.03359
2020-10-23 RUES2-GLR p61 Day3 DE	H	21	PluriControl	2100	1119	339.214	324.191	98.5584	37.6981	841.493	840.764	302.986	328.265	270.745	255.226	113.726	25.7513	3.30652	83.7355	3.66399
2020-10-23 RUES2-GLR p61 Day3 DE	H	22	PluriControl	2100	621	335.523	317.894	90.8566	39.9487	755.701	730.076	306.996	343.13	265.656	249.145	105.241	35.0457	4.34783	75.2013	4.66989
2020-10-23 RUES2-GLR p61 Day3 DE	I	18	PluriControl	2800	1771	341.623	343.025	62.6031	43.2786	917.781	922	315.295	342.866	260.137	258.448	67.002	37.6462	1.2987	89.3281	1.24224
2020-10-23 RUES2-GLR p61 Day3 DE	I	19	PluriControl	2800	2030	346.089	333.901	95.4183	43.9695	890.965	889.39	320.198	355.719	266.832	256.12	94.5111	37.6603	3.20197	87.0936	2.95566
2020-10-23 RUES2-GLR p61 Day3 DE	I	20	PluriControl	2800	1869	345.284	333.139	95.265	37.3111	840.845	846.413	304.941	316.842	280.316	268.948	115.06	33.8715	2.88925	84.2162	2.94275
2020-10-23 RUES2-GLR p61 Day3 DE	I	21	PluriControl	2800	2756	351.346	343.825	83.4267	44.008	906.682	907.114	319.31	343.153	276.611	270.955	79.5569	26.9915	2.46734	88.5341	2.24964
2020-10-23 RUES2-GLR p61 Day3 DE	I	22	PluriControl	2800	1392	334.541	323.029	86.7168	37.466	824.713	808.496	313.093	366.398	262.605	251.907	90.6094	29.4281	2.87356	81.3218	2.87356
2020-10-23 RUES2-GLR p61 Day3 DE	J	18	PluriControl	2800	2099	360.162	350.326	80.3431	48.226	1217.74	1171.7	502.565	475.977	288.517	280.774	79.0941	34.2673	2.19152	94.1877	2.09624
2020-10-23 RUES2-GLR p61 Day3 DE	J	19	PluriControl	2800	1484	348.259	349.398	65.3488	41.687	833.549	842.865	298.773	345.512	274.744	272.693	71.3324	29.7758	1.88679	82.4798	1.75202
2020-10-23 RUES2-GLR p61 Day3 DE	J	20	PluriControl	2800	2593	339.696	329.696	91.3625	48.7627	924.497	914.586	341.078	366.413	270.304	262.316	93.7048	33.1702	2.69958	88.4304	2.69958
2020-10-23 RUES2-GLR p61 Day3 DE	J	21	PluriControl	2800	2079	332.732	327.267	77.1064	42.0554	853.854	863.721	304.072	325.408	260.71	258.17	80.8978	35.6209	1.9721	85.4738	1.7797
2020-10-23 RUES2-GLR p61 Day3 DE	J	22	PluriControl	2800	1509	325.64	323.931	62.8307	38.3	923.118	915.783	331.263	354.974	260.452	260.221	72.1066	26.0285	1.78926	89.3307	1.65673
2020-10-23 RUES2-GLR p61 Day3 DE	K	18	PluriControl	2800	1375	339.188	333.666	69.0586	43.4135	837.584	838.189	305.358	342.868	263.88	265.315	69.1803	33.658	1.67273	84.0727	1.30909
2020-10-23 RUES2-GLR p61 Day3 DE	K	19	PluriControl	2800	1610	353.91	337.512	114.413	54.6635	846.691	825.1	311.772	341.315	281.508	269.344	115.139	39.8612	3.78882	85.1553	3.54037
2020-10-23 RUES2-GLR p61 Day3 DE	K	20	PluriControl	2800	2366	353.704	353.305	58.48	39.7211	946.891	942.252	349.419	379.933	273.573	274.221	64.5476	30.1931	1.14117	88.8842	1.0989
2020-10-23 RUES2-GLR p61 Day3 DE	K	21	PluriControl	2800	1661	327.623	324.976	62.2811	43.3735	913.565	914.292	333.54	343.407	251.896	249.39	66.9934	32.3029	1.44491	88.1397	1.44491
2020-10-23 RUES2-GLR p61 Day3 DE	K	22	PluriControl	2800	1336	324.451	320.559	70.4173	42.4328	809.592	792.505	313.184	358.338	256.88	250.746	78.4767	34.3993	1.42216	81.2874	1.34731
2020-10-23 RUES2-GLR p61 Day3 DE	L	18	PluriControl	3500	3273	360.116	352.354	71.1877	51.0089	1046.44	1035.13	387.041	408.404	278.873	275.507	65.9443	42.0806	1.19157	91.9951	0.977696
2020-10-23 RUES2-GLR p61 Day3 DE	L	19	PluriControl	3500	2079	366.49	357.535	69.2773	65.6169	1079.71	1090.84	403.293	432.119	283.923	275.672	61.1547	42.9405	1.6354	90.861	1.0582
2020-10-23 RUES2-GLR p61 Day3 DE	L	20	PluriControl	3500	3283	351.042	345.31	76.8406	48.653	959.72	961.337	332.916	360.407	278.294	276.492	74.0921	38.432	1.55346	90.6793	1.27932
2020-10-23 RUES2-GLR p61 Day3 DE	L	21	PluriControl	3500	3654	342.385	337.609	79.7412	43.885	841.176	845.466	274.69	289.07	268.405	267.874	72.746	35.022	1.28626	88.1773	1.09469
2020-10-23 RUES2-GLR p61 Day3 DE	L	22	PluriControl	3500	3474	345.541	342.421	53.3322	46.5017	1027.5	1010.6	380.235	390.667	269.687	270.842	47.7914	31.7054	0.431779	91.8826	0.460564
2020-10-23 RUES2-GLR p61 Day3 DE	M	18	PluriControl	3500	1925	345.739	336.433	83.2397	42.2052	881.027	885.044	291.153	321.362	274.626	264.599	92.4298	31.8833	2.44156	88.8312	2.33766
2020-10-23 RUES2-GLR p61 Day3 DE	M	19	PluriControl	3500	2567	364.23	360.597	62.2922	47.6582	1203.57	1185.98	412.071	396.839	280.231	279.548	57.0235	33.7588	1.44137	95.598	0.857032
2020-10-23 RUES2-GLR p61 Day3 DE	M	20	PluriControl	3500	3079	359.959	358.214	60.5048	54.3165	984.963	982.862	325.283	336.903	281.833	283.88	58.5516	41.8345	0.714518	92.3027	0.552127
2020-10-23 RUES2-GLR p61 Day3 DE	M	21	PluriControl	3500	2839	340.151	343.848	52.7757	52.2276	904.21	896.276	309.485	319.957	267.92	272.136	47.6289	40.389	0.211342	89.6795	0.211342
2020-10-23 RUES2-GLR p61 Day3 DE	M	22	PluriControl	3500	3130	356.754	354.374	58.4991	58.2691	1222.53	1176.8	467.289	449.512	274.947	276.148	50.66	40.1132	0.926518	95.2077	0.543131
2020-10-23 RUES2-GLR p61 Day3 DE	N	18	PluriControl	3500	2948	357.214	352.075	75.9065	47.0422	996.886	1004.97	327.906	339.269	344.642	277.707	198.965	47.7649	1.66214	92.8765	13.3989
2020-10-23 RUES2-GLR p61 Day3 DE	N	19	PluriControl	3500	2995	373.489	369.053	51.4893	48.0911	1237.29	1248.18	402.99	422.016	288.64	288.706	42.7599	33.5305	0.634391	96.7613	0.367279
2020-10-23 RUES2-GLR p61 Day3 DE	N	20	PluriControl	3500	3118	352.651	346.959	68.8669	41.733	953.085	944.357	335.938	335.553	278.969	276.76	70.6551	33.9256	1.05837	91.052	1.05837
2020-10-23 RUES2-GLR p61 Day3 DE	N	21	PluriControl	3500	2670	334.213	333.392	69.5254	43.9784	902.439	913.461	294.148	321.196	264.955	266.239	69.2117	35.5602	0.93633	90.2622	0.861423
2020-10-23 RUES2-GLR p61 Day3 DE	N	22	PluriControl	3500	1949	338.664	332.323	91.5503	33.3541	819.148	801.298	292.075	326.145	277.056	269.969	97.775	24.325	2.00103	84.8127	2.05233
2020-10-23 RUES2-GLR p61 Day3 DE	C	3	DEControl	1400	228	759.328	774.12	408.842	549.968	279.226	263.613	66.6151	56.3796	258.473	250.79	47.7849	42.4261	60.9649	0.877193	0.438596
2020-10-23 RUES2-GLR p61 Day3 DE	C	4	DEControl	1400	1444	1051.52	1039.58	533.619	586.153	276.56	267.843	58.7955	42.2504	261.216	261.942	35.5898	39.1051	78.8781	1.10803	0
2020-10-23 RUES2-GLR p61 Day3 DE	C	5	DEControl	1400	1393	781.206	792.153	316.837	320.756	287.079	280.184	57.0471	40.472	264.734	268.735	36.0245	33.8996	76.5255	0.789663	0.143575
2020-10-23 RUES2-GLR p61 Day3 DE	C	6	DEControl	1400	809	947.914	921.788	499.128	599.638	279.043	271.795	57.8386	38.1102	258.868	261.316	35.986	32.3014	73.424	1.48331	0.123609
2020-10-23 RUES2-GLR p61 Day3 DE	C	7	DEControl	1400	1112	905.73	846.813	486.834	574.637	297.065	291.068	53.4337	43.0755	273.339	277.997	36.3193	31.7069	71.1331	0.44964	0.179856
2020-10-23 RUES2-GLR p61 Day3 DE	C	8	DMSOControl	1400	1175	919.504	821.439	577.522	657.071	280.741	271.13	56.1731	40.8501	261.566	265.614	37.644	32.1546	63.6596	0.680851	0.170213
2020-10-23 RUES2-GLR p61 Day3 DE	C	9	DMSOControl	1400	674	738.807	708.991	385.93	461.601	279.469	266.783	73.0703	41.5699	259.908	260.83	45.4238	35.5038	62.908	1.63205	0.445104
2020-10-23 RUES2-GLR p61 Day3 DE	C	10	DMSOControl	1400	1554	890.929	875.308	420.16	466.381	316.197	307.623	61.5579	47.2631	278.458	281.995	36.1881	34.2844	75.6757	1.6731	0
2020-10-23 RUES2-GLR p61 Day3 DE	C	11	DMSOControl	1400	834	714.142	684.607	343.97	421.855	276.865	270.469	53.3932	38.8271	266.784	268.852	39.2728	37.9872	63.9089	0.959232	0.239808
2020-10-23 RUES2-GLR p61 Day3 DE	C	12	DMSOControl	1400	1252	998.969	1015.52	488.214	523.039	307.836	299.01	65.2873	45.2704	271.901	273.575	40.7234	38.0961	77.8754	2.07668	0.159744
2020-10-23 RUES2-GLR p61 Day3 DE	C	13	SB431542	1400	578	342.318	345.772	45.7758	42.9176	262.239	264.542	40.3756	33.0775	325.339	331.687	49.6577	41.4379	0.346021	0.17301	0.519031
2020-10-23 RUES2-GLR p61 Day3 DE	C	14	SB431542	1400	384	329.518	328.878	54.6619	57.1312	259.337	253.516	58.0223	38.5202	311.023	310.017	65.5765	51.5463	0.520833	0.78125	1.30208
2020-10-23 RUES2-GLR p61 Day3 DE	C	15	SB431542	1400	242	337.605	336.54	53.6698	57.8414	264.189	257.281	49.1154	35.4727	330.54	331.771	57.6976	50.7664	0.413223	0.826446	0.826446
2020-10-23 RUES2-GLR p61 Day3 DE	C	16	SB431542	1400	544	333.761	341.525	53.5333	52.2794	272.248	272.148	43.9718	30.5126	344.966	352.034	65.9444	54.8377	0.367647	0.367647	0.55147
2020-10-23 RUES2-GLR p61 Day3 DE	C	17	SB431542	1400	1074	343.927	344.543	44.5546	44.5951	276.435	271.237	50.8994	38.6855	351.736	351.247	54.8245	49.8613	0	0.558659	1.58287
2020-10-23 RUES2-GLR p61 Day3 DE	D	3	DEControl	1400	584	891.258	668.663	652.747	497.232	252.954	242.788	65.9867	35.7989	250.375	245.913	65.5275	34.3593	57.8767	1.0274	0.684931
2020-10-23 RUES2-GLR p61 Day3 DE	D	4	DEControl	1400	460	706.203	629.794	388.83	399.49	261.464	252.988	56.5894	37.3007	256.697	255.903	42.8712	35.7247	56.7391	0.652174	0.434783
2020-10-23 RUES2-GLR p61 Day3 DE	D	5	DEControl	1400	811	871.968	866.077	448.852	557.21	265.802	259.19	54.4385	40.5936	247.808	248.534	35.4101	35.5424	69.0505	0.863132	0
2020-10-23 RUES2-GLR p61 Day3 DE	D	6	DEControl	1400	1064	1140.79	1075.01	668.316	700.074	288.592	279.558	62.498	50.8169	263.375	265.57	35.5139	37.0813	77.4436	1.2218	0
2020-10-23 RUES2-GLR p61 Day3 DE	D	7	DEControl	1400	888	1079.55	1048.97	645.016	824.011	290.138	277.838	64.2792	44.4661	264.323	266.83	39.2326	32.9552	71.1712	1.46396	0.225225
2020-10-23 RUES2-GLR p61 Day3 DE	D	8	DMSOControl	1400	576	624.591	584.694	261.948	305.124	286.822	278.714	57.5582	40.6269	265.529	265.478	39.0779	34.9842	61.6319	1.38889	0
2020-10-23 RUES2-GLR p61 Day3 DE	D	9	DMSOControl	1400	1086	793.377	763.402	398.257	466.612	302.108	289.625	68.3764	45.1222	269.322	269.394	44.0598	37.7351	67.5875	1.84162	0.368324
2020-10-23 RUES2-GLR p61 Day3 DE	D	10	DMSOControl	1400	939	907.483	816.316	538.594	565.738	298.587	290.843	61.0027	44.908	273.479	276.427	40.9144	36.088	69.8615	0.958466	0.212993
2020-10-23 RUES2-GLR p61 Day3 DE	D	11	DMSOControl	1400	497	805.883	758.858	448.805	532.667	274.696	270.397	56.531	34.7136	266.887	269.156	39.89	34.6691	65.3923	0.804829	0.201207
2020-10-23 RUES2-GLR p61 Day3 DE	D	12	DMSOControl	1400	896	1395.92	1339.14	905.772	1121.99	294.864	281.081	84.3142	45.8887	267.891	270.284	39.7214	38.9123	74.3303	2.79018	0.223214
2020-10-23 RUES2-GLR p61 Day3 DE	D	13	SB431542	1400	245	352.416	354.077	55.9435	59.2714	266.296	263.3	46.4522	43.4802	344.23	347.129	66.4006	62.6888	0.408163	0	0.816326
2020-10-23 RUES2-GLR p61 Day3 DE	D	14	SB431542	1400	534	333.458	331.857	55.767	51.6093	256.777	250.477	54.3021	29.2473	324.261	314.495	75.5378	54.3277	0.936329	1.1236	1.68539
2020-10-23 RUES2-GLR p61 Day3 DE	D	15	SB431542	1400	331	314.752	312.483	46.248	47.4061	249.196	247.476	50.8697	29.4667	310.892	305.008	65.2928	56.5538	0.302115	0.906344	1.20846
2020-10-23 RUES2-GLR p61 Day3 DE	D	16	SB431542	1400	610	345.15	348.161	52.5201	47.2245	266.502	261.106	60.8254	33.6817	347.528	345.402	70.2923	52.9763	0.819672	1.14754	1.47541
2020-10-23 RUES2-GLR p61 Day3 DE	D	17	SB431542	1400	829	333.368	331.074	53.0661	43.756	280.866	276.472	61.3361	30.2836	349.467	350.838	71.7603	47.8791	0.482509	0.965018	1.68878
2020-10-23 RUES2-GLR p61 Day3 DE	E	3	DEControl	1400	833	935.179	916.042	496.051	552.601	271.808	266.876	55.7669	46.1756	256.24	260.996	36.0402	34.3177	74.4298	0.60024	0
2020-10-23 RUES2-GLR p61 Day3 DE	E	4	DEControl	1400	511	1000.21	950.684	547.992	674.266	245.583	241.389	43.99	36.7151	241.982	242.506	38.8971	37.2829	73.1898	0.195695	0.195695
2020-10-23 RUES2-GLR p61 Day3 DE	E	5	DEControl	1400	657	855.278	820.991	473.108	573.547	284.83	278.547	56.1949	44.5032	255.488	256.546	36.5183	31.2888	67.7321	0.608828	0.304414
2020-10-23 RUES2-GLR p61 Day3 DE	E	6	DEControl	1400	1006	916.902	922.263	443.21	511.019	268.099	261.641	52.874	35.8204	257.577	261.55	40.7301	33.5201	75.9443	0.397614	0.198807
2020-10-23 RUES2-GLR p61 Day3 DE	E	7	DEControl	1400	610	1067.51	1025.13	648.938	778.298	264.561	258.31	56.0966	41.77	255.146	256.114	36.5739	33.3377	72.459	0.819672	0.163934
2020-10-23 RUES2-GLR p61 Day3 DE	E	8	DMSOControl	1400	1276	700.098	681.842	311.418	362.071	293.792	285.596	61.875	44.9947	265.518	268.952	44.0001	35.5972	66.3793	0.862069	0.391849
2020-10-23 RUES2-GLR p61 Day3 DE	E	9	DMSOControl	1400	642	696.591	668.767	328.361	402.343	281.487	272.32	58.8803	40.6507	264.816	266.241	38.281	35.4705	62.9283	0.778816	0
2020-10-23 RUES2-GLR p61 Day3 DE	E	10	DMSOControl	1400	1603	926.646	876.327	474.674	565.674	323.797	313.412	67.3042	54.5745	277.448	279.745	37.8852	33.9501	74.423	1.99626	0.124766
2020-10-23 RUES2-GLR p61 Day3 DE	E	11	DMSOControl	1400	1344	884.659	854.925	477.311	574.9	282.992	271.366	64.2322	43.7782	265.312	266.351	39.7461	36.3748	70.0893	0.967262	0.223214
2020-10-23 RUES2-GLR p61 Day3 DE	E	12	DMSOControl	1400	1139	878.478	829.883	470.136	605.267	292.46	283.485	60.6409	42.1281	268.165	271.444	39.1161	38.5624	69.2713	1.66813	0.0877963
2020-10-23 RUES2-GLR p61 Day3 DE	E	13	SB431542	1400	738	344.289	342.464	46.6941	46.1081	265.474	264.028	44.4048	31.8351	345.25	344.964	57.162	48.5084	0	0.542005	1.08401
2020-10-23 RUES2-GLR p61 Day3 DE	E	14	SB431542	1400	1036	360.193	354.197	54.2258	51.699	287.957	279.507	53.7077	38.7337	371.919	362.312	73.4605	59.2855	0.868726	1.06178	3.18533
2020-10-23 RUES2-GLR p61 Day3 DE	E	15	SB431542	1400	585	340.014	340.492	50.8217	51.722	263.36	261.885	45.3653	35.7514	344.019	343.196	64.2298	60.7762	0.51282	0.34188	1.7094
2020-10-23 RUES2-GLR p61 Day3 DE	E	16	SB431542	1400	556	348.174	334.336	186.562	61.6013	281.166	269.45	129.711	47.2831	358.652	347.37	184.513	73.8476	0.719424	1.79856	2.69784
2020-10-23 RUES2-GLR p61 Day3 DE	E	17	SB431542	1400	494	333.237	326.911	54.7716	49.7153	265.981	263.459	49.2048	31.0064	342.176	338.5	67.5367	55.5011	1.417	0.607287	1.417
2020-10-23 RUES2-GLR p61 Day3 DE	F	3	DEControl	2100	2214	1340.49	1282.57	700.477	718.007	289.276	278.065	62.6302	43.816	266.834	269.82	36.9948	38.2392	86.4499	1.49051	0.0451671
2020-10-23 RUES2-GLR p61 Day3 DE	F	4	DEControl	2100	1870	1636.26	1584.42	968.931	1025.56	288.898	277.251	65.2176	39.3741	266.662	270.648	38.6076	35.1739	84.8128	1.3369	0.160428
2020-10-23 RUES2-GLR p61 Day3 DE	F	5	DEControl	2100	1102	1198.31	1170.42	712.248	797.859	280.15	264.495	74.0924	44.4239	253.055	253.952	48.4865	33.509	77.5862	1.81488	0.362976
2020-10-23 RUES2-GLR p61 Day3 DE	F	6	DEControl	2100	1909	1160.26	1113.1	598.686	613.366	294.468	287.61	59.5408	40.1503	273.199	277.091	38.9358	39.9368	84.6516	1.15244	0.104767
2020-10-23 RUES2-GLR p61 Day3 DE	F	7	DEControl	2100	1705	1278.61	1267.75	704.351	757.856	299.949	291.737	64.189	45.1155	276.176	280.147	37.027	35.6714	80.8798	1.29032	0.117302
2020-10-23 RUES2-GLR p61 Day3 DE	F	8	DMSOControl	2100	2034	1344.34	1300.09	732.481	778.263	307.843	295.746	64.7532	43.2208	283.908	287.32	39.2514	36.9738	84.2183	1.72075	0.147493
2020-10-23 RUES2-GLR p61 Day3 DE	F	9	DMSOControl	2100	1904	1159.72	1124.47	609.099	650.398	300.874	296.181	60.3422	48.8532	276.415	279.093	39.0812	40.4253	81.4076	0.997899	0.105042
2020-10-23 RUES2-GLR p61 Day3 DE	F	10	DMSOControl	2100	1355	958.917	927.41	493.059	514.803	291.361	282.298	64.5772	42.9124	269.291	271.474	40.7095	35.8285	77.3432	1.25461	0.147601
2020-10-23 RUES2-GLR p61 Day3 DE	F	11	DMSOControl	2100	3174	1179.58	1181.04	550.069	565.412	316.351	305.397	68.2517	46.1163	285.266	287.872	40.3173	38.3304	84.6251	2.45747	0.189036
2020-10-23 RUES2-GLR p61 Day3 DE	F	12	DMSOControl	2100	1898	987.515	936.682	533.302	611.585	315.966	305.762	69.5039	52.7857	285.933	288.902	40.0542	40.0109	75.5532	2.52898	0.158061
2020-10-23 RUES2-GLR p61 Day3 DE	F	13	SB431542	2100	2094	356.635	355.096	55.2115	58.6709	282.072	281.002	50.2861	42.329	395.832	395.582	78.0427	80.5578	0.620821	0.429799	7.02006
2020-10-23 RUES2-GLR p61 Day3 DE	F	14	SB431542	2100	1073	357.169	353.066	58.3113	54.1193	288.018	284.618	46.2299	38.9835	387.134	384.553	71.7246	59.8748	0.372787	0.55918	2.7959
2020-10-23 RUES2-GLR p61 Day3 DE	F	15	SB431542	2100	1545	350.276	352.24	47.7293	48.8146	270.241	272.183	41.4822	32.8218	363.639	367.799	58.4841	50.0793	0.453074	0.2589	1.35922
2020-10-23 RUES2-GLR p61 Day3 DE	F	16	SB431542	2100	1891	345.363	345.254	47.8657	48.7049	274.406	272.869	47.508	36.555	360.287	359.739	59.8219	54.318	0.370174	0.528821	1.32205
2020-10-23 RUES2-GLR p61 Day3 DE	F	17	SB431542	2100	1248	335.482	332.447	128.908	50.659	273.675	268.859	87.5152	35.3622	352.344	352.736	84.9958	57.3255	0.0801282	0.320513	1.04167
2020-10-23 RUES2-GLR p61 Day3 DE	G	3	DEControl	2100	1709	1384.56	1316.93	748.296	746.237	282.486	273.696	61.4207	36.7522	263.338	265.114	40.6921	32.8203	85.0205	1.34582	0.292569
2020-10-23 RUES2-GLR p61 Day3 DE	G	4	DEControl	2100	1475	1143.92	1117.92	592.832	598.668	275.127	265.479	63.4906	36.4245	256.832	257.456	38.969	32.3785	81.7627	1.01695	0.338983
2020-10-23 RUES2-GLR p61 Day3 DE	G	5	DEControl	2100	1869	1380.89	1359.38	730.189	739.18	296.587	285.243	67.9739	46.2527	267.836	265.852	52.2382	41.1807	84.5372	1.44462	0.374532
2020-10-23 RUES2-GLR p61 Day3 DE	G	6	DEControl	2100	1787	1160.4	1144.9	582.627	610.933	276.887	267.113	58.6869	39.7989	257.503	259.336	38.9637	33.9501	82.8763	1.00727	0.279799
2020-10-23 RUES2-GLR p61 Day3 DE	G	7	DEControl	2100	1676	919.807	939.96	423.986	462.148	294.632	284.615	64.9441	44.8346	271.471	273.443	38.6331	39.2985	77.9236	1.25298	0.119332
2020-10-23 RUES2-GLR p61 Day3 DE	G	8	DMSOControl	2100	2050	1185.68	1156.97	622.436	696.081	292.406	283.292	59.4693	38.2288	276.278	280.517	37.6058	35.1339	80.7805	1.12195	0.097561
2020-10-23 RUES2-GLR p61 Day3 DE	G	9	DMSOControl	2100	3153	1321.88	1307.91	663.483	675.398	318.484	311.697	61.94	48.0926	282.323	285.742	37.8268	36.8515	85.5059	1.74437	0.0634317
2020-10-23 RUES2-GLR p61 Day3 DE	G	10	DMSOControl	2100	3049	1062.68	1036.7	474.68	463.92	309.159	301.934	64.0055	45.6567	279.541	283.471	38.756	38.6529	85.1099	1.4103	0.0983929
2020-10-23 RUES2-GLR p61 Day3 DE	G	11	DMSOControl	2100	2575	1200.61	1187.92	608.676	622.821	298.345	288.388	64.1659	43.8182	280.867	283.541	38.9006	37.572	82.5243	1.6699	0.194175
2020-10-23 RUES2-GLR p61 Day3 DE	G	12	DMSOControl	2100	3485	1203.99	1204.49	613.395	675.962	327.403	315.335	74.9126	47.9013	284.661	289.068	38.5782	38.0406	81.2626	3.099	0.0860832
2020-10-23 RUES2-GLR p61 Day3 DE	G	13	SB431542	2100	1483	358.512	355.947	63.6264	55.0237	291.388	286.758	76.4653	39.1836	394.668	391.652	92.3154	64.9038	0.404585	0.472016	5.19218
2020-10-23 RUES2-GLR p61 Day3 DE	G	14	SB431542	2100	1682	340.379	339.509	44.4378	43.7812	267.969	266.915	46.9269	30.7617	363.434	362.397	61.6799	51.0252	0.237812	0.535077	1.07015
2020-10-23 RUES2-GLR p61 Day3 DE	G	15	SB431542	2100	1639	343.581	344.73	47.706	44.5536	273.643	271.594	44.6708	33.7677	357.927	360.979	59.1156	49.8806	0.42709	0.305064	1.03722
2020-10-23 RUES2-GLR p61 Day3 DE	G	16	SB431542	2100	1325	337.475	337.999	45.5361	48.1682	265.905	269.295	38.7086	27.2235	355.351	355.611	57.15	51.1808	0.0754717	0.377358	0.981132
2020-10-23 RUES2-GLR p61 Day3 DE	G	17	SB431542	2100	1385	337.37	341.015	47.4235	52.1534	266.143	266.754	39.4244	33.7662	353.105	357.034	57.2579	60.3789	0.0722022	0	0.216606
2020-10-23 RUES2-GLR p61 Day3 DE	H	3	DEControl	2100	2244	1176.04	1102.28	641.949	647.824	288.142	278.154	67.8483	43.3349	267.453	267.443	47.5119	37.3964	81.6399	2.04991	0.26738
2020-10-23 RUES2-GLR p61 Day3 DE	H	4	DEControl	2100	1664	1086.8	1059.56	579.246	595.243	281.756	269.407	60.3439	44.4343	254.869	255.744	35.9707	32.7514	79.3269	0.721154	0.120192
2020-10-23 RUES2-GLR p61 Day3 DE	H	5	DEControl	2100	1922	1137.19	1128.57	529.971	551.253	295.517	285.572	60.7059	44.816	269.711	271.074	36.8298	38.8204	83.7669	0.988554	0.104058
2020-10-23 RUES2-GLR p61 Day3 DE	H	6	DEControl	2100	1478	1122.99	1107.53	615.383	675.791	287.769	274.407	67.9785	45.9702	267.668	268.369	40.5802	35.9427	78.4168	1.69147	0.202977
2020-10-23 RUES2-GLR p61 Day3 DE	H	7	DEControl	2100	1761	959.383	921.827	495.027	559.53	291.631	281.031	64.0569	40.7493	264.927	268.544	35.5619	37.0635	76.1499	1.70358	0
2020-10-23 RUES2-GLR p61 Day3 DE	H	8	DMSOControl	2100	2428	1249.81	1206.65	652.565	654.433	293.005	286.015	56.7992	40.5076	272.075	275.88	34.8214	34.8263	83.6903	1.15321	0.0411862
2020-10-23 RUES2-GLR p61 Day3 DE	H	9	DMSOControl	2100	2027	1492.93	1458.4	858.644	892.718	292.15	279.133	209.068	41.0443	270.854	271.19	133.196	34.9775	82.4371	1.08535	0.098668
2020-10-23 RUES2-GLR p61 Day3 DE	H	10	DMSOControl	2100	1439	1348.43	1285.56	794.687	784.34	284.011	276.345	58.5235	42.0006	278.226	280.462	43.3137	43.0443	81.098	1.18138	0.277971
2020-10-23 RUES2-GLR p61 Day3 DE	H	11	DMSOControl	2100	1778	927.936	932.973	434.896	474.858	285.149	277.156	59.468	39.7848	273.748	277.307	37.7237	35.6765	76.9966	1.06862	0.112486
2020-10-23 RUES2-GLR p61 Day3 DE	H	12	DMSOControl	2100	1052	821.291	829.539	367.542	408.984	292.915	282.176	64.0272	43.8027	265.533	266.252	43.4325	37.3385	74.6198	1.61597	0.380228
2020-10-23 RUES2-GLR p61 Day3 DE	H	13	SB431542	2100	1285	340.297	341.058	46.9727	46.7271	258.826	255.925	45.2126	37.3081	332.794	334.887	51.09	51.1645	0.077821	0.233463	0.233463
2020-10-23 RUES2-GLR p61 Day3 DE	H	14	SB431542	2100	1070	348.55	347.641	57.4654	63.307	268.477	266.418	47.6227	43.8138	363.936	364.067	76.1101	80.0567	0.654206	0.373832	1.68224
2020-10-23 RUES2-GLR p61 Day3 DE	H	15	SB431542	2100	1320	334.704	336.041	48.5474	48.4929	266.415	266.353	44.5877	35.1969	347.65	348.44	63.7628	54.4818	0.378788	0.30303	1.51515
2020-10-23 RUES2-GLR p61 Day3 DE	H	16	SB431542	2100	1017	351.375	353.387	51.0651	45.5751	285.412	286.691	50.734	32.9285	383.095	383.655	79.6725	49.5085	0.491642	0.58997	2.35988
2020-10-23 RUES2-GLR p61 Day3 DE	H	17	SB431542	2100	1837	338.176	339.594	46.7773	47.1482	271.486	272.254	38.8235	35.1391	372.171	373.927	61.3465	60.0201	0.217746	0.16331	0.925422
2020-10-23 RUES2-GLR p61 Day3 DE	I	3	DEControl	2800	2486	1110.76	1091.82	512.694	491.572	312.508	294.916	82.8131	45.7486	272.779	272.442	53.3361	36.6921	85.4787	3.37892	0.321802
2020-10-23 RUES2-GLR p61 Day3 DE	I	4	DEControl	2800	2321	1528.11	1529.93	775.322	801.004	289.642	281.785	63.1804	40.8871	268.085	268.669	45.0861	38.1295	86.9022	1.33563	0.215424
2020-10-23 RUES2-GLR p61 Day3 DE	I	5	DEControl	2800	2481	1442.74	1389.12	752.221	764.399	298.495	288.651	69.6231	44.0644	269.64	271.314	46.2845	39.1569	87.505	1.65256	0.282144
2020-10-23 RUES2-GLR p61 Day3 DE	I	6	DEControl	2800	1944	917.316	895.139	452.431	452.937	298.157	286.274	72.4785	44.4076	264.25	265.083	41.1107	36.0353	78.035	2.00617	0.205761
2020-10-23 RUES2-GLR p61 Day3 DE	I	7	DEControl	2800	2159	1010.56	1016.55	488.665	546.958	313.284	300.585	78.033	49.1482	270.761	274.043	37.5887	35.3763	78.7402	3.01065	0.138953
2020-10-23 RUES2-GLR p61 Day3 DE	I	8	DMSOControl	2800	2463	1273.31	1253.75	624.685	623.604	292.568	286.311	57.0786	38.2896	270.807	274.306	36.3251	33.8033	85.7897	0.771417	0.162404
2020-10-23 RUES2-GLR p61 Day3 DE	I	9	DMSOControl	2800	2663	1325.59	1296.59	674.524	701.759	302.802	292.453	66.7927	42.1622	278.354	281.652	40.7666	33.9115	85.8055	1.42696	0.150207
2020-10-23 RUES2-GLR p61 Day3 DE	I	10	DMSOControl	2800	3151	1948.94	1915.32	1006	981.97	301.162	292.707	62.0491	42.0035	275.431	279.616	34.7448	35.191	89.908	1.49159	0.0634719
2020-10-23 RUES2-GLR p61 Day3 DE	I	11	DMSOControl	2800	2614	1535.3	1512.94	869.824	926.957	298.512	289.685	69.9575	44.3275	277.435	281.271	37.1341	37.8819	83.8562	1.79801	0.0765111
2020-10-23 RUES2-GLR p61 Day3 DE	I	12	DMSOControl	2800	2878	1019.11	999.053	486.329	523.112	317.132	308.62	69.8888	45.6144	285.489	288.029	41.6002	37.7789	81.0285	2.18902	0.138985
2020-10-23 RUES2-GLR p61 Day3 DE	I	13	SB431542	2800	2365	357.885	357	53.3184	58.192	284.36	284.057	45.8343	36.6247	390.911	391.63	66.554	67.2759	0.591966	0.2537	3.84778
2020-10-23 RUES2-GLR p61 Day3 DE	I	14	SB431542	2800	2180	370.304	354.013	236.981	57.2224	281.659	279.564	46.1728	38.2474	423.676	395.935	326.96	84.3192	1.10092	0.504587	13.7156
2020-10-23 RUES2-GLR p61 Day3 DE	I	15	SB431542	2800	1811	350.123	348.937	70.8602	48.8991	278.097	276.451	63.2411	34.1487	389.588	389.102	88.6182	63.9697	0.276091	0.441745	3.86527
2020-10-23 RUES2-GLR p61 Day3 DE	I	16	SB431542	2800	1536	355.42	350.068	56.8522	54.7072	290.069	287.211	49.0975	41.9917	401.107	394.798	77.5827	72.3131	0.846354	0.585937	9.04948
2020-10-23 RUES2-GLR p61 Day3 DE	I	17	SB431542	2800	2683	352.715	353.383	49.682	51.8643	286.411	286.245	45.0202	36.9983	397.871	398.671	65.1136	63.3263	0.260902	0.335445	4.73351
2020-10-23 RUES2-GLR p61 Day3 DE	J	3	DEControl	2800	2447	1039.64	1000.42	500.964	517.263	307.343	296.696	68.1148	42.0421	273.864	277.714	41.0219	35.8967	82.0188	1.79812	0.245198
2020-10-23 RUES2-GLR p61 Day3 DE	J	4	DEControl	2800	3955	1076.66	1022.92	509.006	517.072	317.807	305.169	72.0607	47.5336	274.251	276.293	42.2792	38.2451	85.4109	2.68015	0.328698
2020-10-23 RUES2-GLR p61 Day3 DE	J	5	DEControl	2800	2626	1158.59	1129.12	562.944	577.161	314.779	303.68	70.3815	52.0148	280.541	283.573	45.1643	41.6062	84.6535	1.90404	0.152323
2020-10-23 RUES2-GLR p61 Day3 DE	J	6	DEControl	2800	3003	1040.08	990.763	499.947	478.52	315.264	305.83	68.9866	49.891	277.197	279.343	40.6692	40.6084	83.683	1.9647	0.1332
2020-10-23 RUES2-GLR p61 Day3 DE	J	7	DEControl	2800	2649	1015.31	973.074	500.819	555.802	330.828	320.588	72.682	46.1444	283.693	288.215	42.3246	37.2177	79.3129	2.71801	0.302001
2020-10-23 RUES2-GLR p61 Day3 DE	J	8	DMSOControl	2800	1967	1056.24	1031.92	549.196	635.131	302.714	296.887	59.3534	43.2652	275.467	278.657	36.4814	37.6981	78.2918	1.06762	0.0508388
2020-10-23 RUES2-GLR p61 Day3 DE	J	9	DMSOControl	2800	2595	1924.05	1830.77	1170.98	1208.2	298.824	291.325	65.362	42.8546	274.364	279.211	42.0005	36.764	86.6667	1.69557	0.0385356
2020-10-23 RUES2-GLR p61 Day3 DE	J	10	DMSOControl	2800	2118	1070.94	1021.99	535.463	587.072	308.062	302.955	55.4002	43.9502	283.624	288.296	39.6338	40.6959	82.4363	0.802644	0.0944287
2020-10-23 RUES2-GLR p61 Day3 DE	J	11	DMSOControl	2800	1819	1126.07	1109.27	574.68	637.081	299.786	294.598	55.8012	40.9524	329.521	292.4	407.619	38.7196	81.3634	1.15448	2.14404
2020-10-23 RUES2-GLR p61 Day3 DE	J	12	DMSOControl	2800	1643	1206.9	1183.66	600.566	613.396	298.433	293.262	55.2541	39.5068	283.126	289.38	36.3444	35.4475	83.6275	1.33901	0
2020-10-23 RUES2-GLR p61 Day3 DE	J	13	SB431542	2800	1376	354.669	350.707	61.4784	56.3136	280.667	280.084	49.7934	36.9457	391.309	386.795	82.2227	72.9328	0.872093	0.218023	7.12209
2020-10-23 RUES2-GLR p61 Day3 DE	J	14	SB431542	2800	1962	370.795	369.836	56.8518	64.1632	293.059	293.058	40.83	40.6188	419.759	417.978	76.5534	82.9989	1.01937	0.203874	16.4118
2020-10-23 RUES2-GLR p61 Day3 DE	J	15	SB431542	2800	1696	351.414	352.644	47.4579	51.4292	275.604	275.44	37.6743	33.3622	402.072	404.644	67.9154	70.3931	0.117925	0.176887	5.89623
2020-10-23 RUES2-GLR p61 Day3 DE	J	16	SB431542	2800	1318	352.983	349.942	54.1667	55.2936	291.39	289.786	44.7943	48.1845	403.186	396.615	76.7696	80.2561	0.151745	0.151745	13.1259
2020-10-23 RUES2-GLR p61 Day3 DE	J	17	SB431542	2800	1872	331.205	331.636	44.1983	44.7508	272.312	274.136	37.1614	31.1991	360.204	361.731	57.4029	49.3142	0.106838	0.106838	0.694444
2020-10-23 RUES2-GLR p61 Day3 DE	K	3	DEControl	2800	2907	1100.3	1077.61	511.91	527.153	306.007	296.252	61.525	44.9984	273.978	275.904	41.8049	36.1888	83.5569	1.58239	0.275198
2020-10-23 RUES2-GLR p61 Day3 DE	K	4	DEControl	2800	3397	926.041	892.991	422.411	437.232	313.273	303.755	68.4815	47.9873	273.104	271.641	46.8729	38.9983	81.0127	1.82514	0.441566
2020-10-23 RUES2-GLR p61 Day3 DE	K	5	DEControl	2800	2863	1515.48	1451.61	781.136	757.964	294.017	287.613	59.9907	41.3616	264.049	266.024	36.4753	36.0376	88.6483	1.01292	0.174642
2020-10-23 RUES2-GLR p61 Day3 DE	K	6	DEControl	2800	1842	905.442	874.667	420.655	446.958	325.252	315.897	66.54	50.7412	281.783	285.875	38.1237	40.0865	79.4245	2.06297	0.108578
2020-10-23 RUES2-GLR p61 Day3 DE	K	7	DEControl	2800	2622	1282.67	1248.08	677.931	713.142	318.076	304.365	73.8793	50.1971	278.497	282.443	38.6161	36.2095	84.1724	2.47902	0.152555
2020-10-23 RUES2-GLR p61 Day3 DE	K	8	DMSOControl	2800	2645	1255.77	1225.49	640.373	646.556	290.219	282.409	57.704	38.7018	270.094	272.262	40.5341	35.9293	84.4991	1.09641	0.226843
2020-10-23 RUES2-GLR p61 Day3 DE	K	9	DMSOControl	2800	2130	1449.6	1364.02	825.726	836.361	307.245	296.566	70.4506	46.0829	271.561	274.214	37.6942	37.9642	84.9296	2.01878	0.0469484
2020-10-23 RUES2-GLR p61 Day3 DE	K	10	DMSOControl	2800	2347	1688.85	1651.12	904.319	904.935	294.976	286.395	65.0295	39.237	267.065	269.734	35.2643	35.6121	87.4734	1.27823	0.127823
2020-10-23 RUES2-GLR p61 Day3 DE	K	11	DMSOControl	2800	1915	1600.53	1555.75	871.369	939.702	291.958	287.323	59.6074	37.7574	277.862	282.376	42.967	36.8619	86.7885	1.04439	0.156658
2020-10-23 RUES2-GLR p61 Day3 DE	K	12	DMSOControl	2800	2341	1165.64	1182.08	552.131	555.412	297.38	288.645	59.5073	41.3972	273.43	276.568	34.4465	32.6646	82.8278	1.15335	0.0854336
2020-10-23 RUES2-GLR p61 Day3 DE	K	13	SB431542	2800	1846	361.15	361.125	54.0895	56.6413	284.813	284.899	47.8591	38.7122	383.823	384.113	68.4406	66.0543	0.541712	0.433369	3.90032
2020-10-23 RUES2-GLR p61 Day3 DE	K	14	SB431542	2800	1538	338.053	337.333	46.5263	48.7605	271.037	272.292	37.6073	32.7054	363.224	361.301	63.6081	63.6421	0.130039	0.0650195	1.69051
2020-10-23 RUES2-GLR p61 Day3 DE	K	15	SB431542	2800	1504	356.957	359.414	48.8495	49.997	283.375	281.168	50.5683	41.5647	400.693	405.038	70.3217	75.3806	0.265957	0.531915	5.78457
2020-10-23 RUES2-GLR p61 Day3 DE	K	16	SB431542	2800	1591	351.245	354.913	52.1384	55.8747	281.263	283.693	43.8519	43.5232	402.615	409.117	78.3875	78.5081	0.125707	0	8.17096
2020-10-23 RUES2-GLR p61 Day3 DE	K	17	SB431542	2800	1853	346.079	344.097	51.1284	53.378	279.194	276.102	49.8784	40.9242	389.314	384.132	71.4892	68.1077	0.215866	0.1619	6.31408
2020-10-23 RUES2-GLR p61 Day3 DE	L	3	DEControl	3500	3539	1182.49	1156.73	571.677	563.655	292.508	283.131	64.6903	42.1518	267.536	268.573	35.7447	35.446	84.4024	1.86493	0.113026
2020-10-23 RUES2-GLR p61 Day3 DE	L	4	DEControl	3500	4185	1880.49	1887.15	947.43	933.845	297.822	286.835	68.3291	38.8545	267.671	270.392	35.4012	32.1235	90.2509	1.72043	0.119474
2020-10-23 RUES2-GLR p61 Day3 DE	L	5	DEControl	3500	3830	1284.79	1252.44	611.119	594.425	305.694	298.018	64.5291	42.3216	274.135	277.6	36.8	36.7811	87.624	1.51436	0.0522193
2020-10-23 RUES2-GLR p61 Day3 DE	L	6	DEControl	3500	3233	1264.32	1241.91	615.052	607	308.173	300.243	67.2485	46.567	268.772	271.343	36.9505	37.7099	85.648	1.51562	0.061862
2020-10-23 RUES2-GLR p61 Day3 DE	L	7	DEControl	3500	2816	1287.74	1251.09	653.456	632.33	303.607	293.354	67.1591	47.0992	274.725	276.161	40.9196	40.0443	85.1918	1.66903	0.142045
2020-10-23 RUES2-GLR p61 Day3 DE	L	8	DMSOControl	3500	3532	1347.33	1319.17	707.174	723.736	306.203	299.455	60.1394	43.8798	281.129	283.747	40.3844	38.6551	83.9468	1.38732	0.198188
2020-10-23 RUES2-GLR p61 Day3 DE	L	9	DMSOControl	3500	4396	1081.75	1056.34	508.295	505.893	322.131	315.271	65.0763	49.2898	280.521	283.825	35.7014	34.4593	83.5532	1.6606	0.0909918
2020-10-23 RUES2-GLR p61 Day3 DE	L	10	DMSOControl	3500	2359	1213.51	1160.08	619.541	651.188	288.865	280.049	68.5465	44.2289	282.766	274.866	257.926	40.5076	84.6969	1.48368	0.254345
2020-10-23 RUES2-GLR p61 Day3 DE	L	11	DMSOControl	3500	3329	1334.03	1277.67	719.415	748.477	299.59	291.717	69.0537	39.1421	281.901	285.518	40.4588	40.3223	84.4097	1.65215	0.210273
2020-10-23 RUES2-GLR p61 Day3 DE	L	12	DMSOControl	3500	3504	2029.71	2023.61	1101.99	1117.24	309.7	299.504	69.7218	45.5218	286.794	290.007	39.2045	38.4727	89.5833	2.16895	0.114155
2020-10-23 RUES2-GLR p61 Day3 DE	L	13	SB431542	3500	3066	354.503	354.644	49.4124	51.639	281.038	281.501	43.6233	33.32	393.288	391.572	64.5547	63.8652	0.260926	0.293542	3.32681
2020-10-23 RUES2-GLR p61 Day3 DE	L	14	SB431542	3500	2078	356.128	351.14	94.1689	51.9607	288.951	283.315	76.2098	38.9672	395.64	388.64	140.582	69.849	0.433109	0.433109	5.10106
2020-10-23 RUES2-GLR p61 Day3 DE	L	15	SB431542	3500	2532	342.082	342.995	45.4615	48.6345	263.928	264.959	36.9825	29.8796	349.378	350.462	54.8439	52.3284	0.157978	0.118483	0.552923
2020-10-23 RUES2-GLR p61 Day3 DE	L	16	SB431542	3500	2862	349.563	351.108	50.1814	52.7635	276.663	276.039	42.7278	36.6402	395.184	393.908	72.3939	70.8653	0.139762	0.279525	5.66038
2020-10-23 RUES2-GLR p61 Day3 DE	L	17	SB431542	3500	3532	346.924	346.231	48.9077	51.1912	282.488	280.366	45.9452	35.4957	401.48	398.596	68.9137	69.846	0.169875	0.311438	7.89921
2020-10-23 RUES2-GLR p61 Day3 DE	M	3	DEControl	3500	2879	882.777	869.224	361.349	376.576	308.235	301.677	65.5017	43.0547	275.485	277.551	44.308	38.9064	82.9107	1.56304	0.104203
2020-10-23 RUES2-GLR p61 Day3 DE	M	4	DEControl	3500	4130	1261.71	1249.69	578.684	570.033	305.161	294.743	69.7745	43.9999	276.4	278.543	41.1459	38.6151	87.5303	2.05811	0.145278
2020-10-23 RUES2-GLR p61 Day3 DE	M	5	DEControl	3500	3583	1622.95	1589.24	825.231	774.629	305.894	294.781	74.6876	45.7338	272.397	271.932	48.1943	38.9642	89.5897	2.12113	0.279096
2020-10-23 RUES2-GLR p61 Day3 DE	M	6	DEControl	3500	2933	1430.37	1393.86	772.797	782.294	303.881	297.515	63.2944	43.495	267.809	270.464	38.1611	36.9627	84.4869	1.36379	0.102284
2020-10-23 RUES2-GLR p61 Day3 DE	M	7	DEControl	3500	3212	1220.68	1198.11	646.694	661.196	319.383	306.695	77.5125	48.2846	280.376	283.909	39.3585	38.3489	82.0984	3.45579	0.0933997
2020-10-23 RUES2-GLR p61 Day3 DE	M	8	DMSOControl	3500	2685	1086.02	1061.09	500.428	503.995	311.84	308.373	55.6462	39.2251	287.621	292.138	41.8852	37.111	84.5438	1.30354	0.148976
2020-10-23 RUES2-GLR p61 Day3 DE	M	9	DMSOControl	3500	2839	1499.65	1452.95	775.215	789.87	306.449	297.559	68.0978	41.4105	285.444	288.145	38.5468	36.5446	87.9183	2.18387	0.246566
2020-10-23 RUES2-GLR p61 Day3 DE	M	10	DMSOControl	3500	2421	1566.13	1538.53	868.738	925.021	326.973	314.229	86.6271	52.5359	279.378	282.062	41.676	37.1643	85.3366	3.51095	0.289137
2020-10-23 RUES2-GLR p61 Day3 DE	M	11	DMSOControl	3500	2736	1771.27	1706.37	963.603	959.353	303.705	296.319	68.882	45.8716	275.223	277.167	44.8818	37.9479	88.633	1.68129	0.438596
2020-10-23 RUES2-GLR p61 Day3 DE	M	12	DMSOControl	3500	3507	1273.2	1251.56	623.601	634.422	307.031	302.758	61.3467	42.1399	287.509	291.629	38.6867	39.0606	86.0279	1.25463	0.0570288
2020-10-23 RUES2-GLR p61 Day3 DE	M	13	SB431542	3500	2141	361.7	361.094	51.0231	54.7761	289.553	285.971	47.6234	42.6692	407.015	404.085	73.0444	76.385	0.280243	0.467071	9.90191
2020-10-23 RUES2-GLR p61 Day3 DE	M	14	SB431542	3500	1921	346.098	346.257	48.8762	48.5729	274.168	274.864	38.4547	34.9819	388.28	390.12	65.7861	63.141	0.104112	0.0520562	2.91515
2020-10-23 RUES2-GLR p61 Day3 DE	M	15	SB431542	3500	2306	351.275	348.404	51.4656	55.195	284.49	282.554	53.5906	40.9805	386.755	386.45	67.8934	73.6452	0.216826	0.520382	3.64267
2020-10-23 RUES2-GLR p61 Day3 DE	M	16	SB431542	3500	2590	347.776	348.178	48.2247	49.5707	278.446	278.769	41.8894	38.346	390.002	387.996	69.1523	71.6904	0.0772201	0.11583	4.98069
2020-10-23 RUES2-GLR p61 Day3 DE	M	17	SB431542	3500	2213	346.285	348.402	48.2209	49.9058	276.339	279.222	40.7379	36.1843	405.34	407.22	71.2295	71.0492	0.135563	0.225938	7.50113
2020-10-23 RUES2-GLR p61 Day3 DE	N	3	DEControl	3500	2862	1324.13	1283.64	698.342	724.212	295.465	284.736	72.5311	41.0139	268.593	268.236	49.1516	37.5365	84.2767	1.99161	0.419287
2020-10-23 RUES2-GLR p61 Day3 DE	N	4	DEControl	3500	3707	1585.3	1541.97	812.083	815.727	294.935	287.764	64.1419	39.6818	270.121	271.225	42.716	35.8107	87.9687	1.40275	0.26976
2020-10-23 RUES2-GLR p61 Day3 DE	N	5	DEControl	3500	3446	1683.35	1669.23	831.901	823.481	294.831	289.072	58.1559	43.0673	273.522	275.512	37.9381	41.6981	89.437	0.928613	0.0580383
2020-10-23 RUES2-GLR p61 Day3 DE	N	6	DEControl	3500	3200	1356.83	1315.2	692.602	714.806	318.233	306.191	77.3594	51.9318	276.871	279.812	38.0525	37.3074	85.8437	2.53125	0.1875
2020-10-23 RUES2-GLR p61 Day3 DE	N	7	DEControl	3500	3133	1284.66	1263.18	662.819	701.781	315.625	301.572	85.7963	43.6122	280.643	283.61	39.9556	40.5832	83.7536	3.25567	0.159591
2020-10-23 RUES2-GLR p61 Day3 DE	N	8	DMSOControl	3500	3461	1548.93	1523.52	783.248	793.243	311.939	301.147	72.1906	46.8368	281.445	282.905	43.0099	39.2815	87.7781	2.05143	0.26004
2020-10-23 RUES2-GLR p61 Day3 DE	N	9	DMSOControl	3500	3714	1464.25	1426.11	748.073	763.398	317.024	308.927	73.4351	46.5462	285.038	289.553	39.0512	40.5928	87.5606	2.23479	0.0807754
2020-10-23 RUES2-GLR p61 Day3 DE	N	10	DMSOControl	3500	2674	1230.61	1229.7	609.492	648.808	298.61	291.341	61.974	44.6559	281.436	283.403	41.4173	37.6499	83.7322	1.49589	0.186986
2020-10-23 RUES2-GLR p61 Day3 DE	N	11	DMSOControl	3500	2927	1733.6	1659.66	988.453	1018.18	306.448	295.151	79.7943	43.9013	283.281	285.354	40.3217	42.4187	86.9491	2.59652	0.136659
2020-10-23 RUES2-GLR p61 Day3 DE	N	12	DMSOControl	3500	3099	2626.56	2603.04	1516.02	1535.85	311.308	301.96	77.963	43.2563	284.266	287.944	39.2244	35.4934	89.9645	1.80703	0.225879
2020-10-23 RUES2-GLR p61 Day3 DE	N	13	SB431542	3500	2502	357.28	355.457	52.9115	55.9956	286.591	287.435	44.7971	43.2022	400.926	400.039	76.8276	85.4585	0.479616	0.19984	8.67306
2020-10-23 RUES2-GLR p61 Day3 DE	N	14	SB431542	3500	2349	349.511	349.1	47.2382	49.716	277.505	276.41	37.0014	33.2473	374.017	371.157	60.9783	59.6361	0.170285	0	2.80971
2020-10-23 RUES2-GLR p61 Day3 DE	N	15	SB431542	3500	2598	347.963	347.051	49.703	52.848	268.478	268.481	46.8988	33.4067	375.964	373.468	67.2718	66.8334	0.307929	0.423403	2.30947
2020-10-23 RUES2-GLR p61 Day3 DE	N	16	SB431542	3500	2190	348.901	347.984	48.6287	51.1097	286.254	285.402	44.3771	43.7834	410.497	412.332	74.7899	78.1049	0.0913242	0.0913242	11.0502
2020-10-23 RUES2-GLR p61 Day3 DE	N	17	SB431542	3500	2879	343.515	344.275	46.854	48.3698	279.338	280.397	39.7925	34.8485	385.926	387.572	63.5094	58.0468	0.138937	0.104203	2.22299
2020-10-29 RUES2-GLR p62 Day3 DE	C	18	PluriControl	1400	370	420.954	344.599	176.432	95.8286	713.219	700.975	310.49	338.836	388.775	265.541	225.614	63.757	25.4054	70	26.2162
2020-10-29 RUES2-GLR p62 Day3 DE	C	19	PluriControl	1400	504	351.361	317.481	134.879	38.8071	612.745	579.476	259.999	272.289	300.983	254.258	161.531	27.2376	10.9127	60.119	10.9127
2020-10-29 RUES2-GLR p62 Day3 DE	C	20	PluriControl	1400	543	381.452	329.346	157.958	45.9146	716.156	667.461	322.891	345.87	337.115	266.882	203.257	30.423	15.2854	67.7716	14.9171
2020-10-29 RUES2-GLR p62 Day3 DE	C	21	PluriControl	1400	318	397.687	339.964	165.163	41.968	786.948	775.989	337.859	394.383	341.031	262.913	197.295	33.105	16.6667	74.5283	15.4088
2020-10-29 RUES2-GLR p62 Day3 DE	C	22	PluriControl	1400	264	380.275	320.025	151.132	36.5357	730.749	706.738	313.375	349.434	336.518	254.15	191.509	23.5237	14.7727	72.7272	17.0454
2020-10-29 RUES2-GLR p62 Day3 DE	D	18	PluriControl	1400	399	426.769	354.899	169.958	86.3407	729.274	734.866	282.394	336.604	390.392	275.75	217.029	81.5208	25.8145	74.4361	28.0702
2020-10-29 RUES2-GLR p62 Day3 DE	D	19	PluriControl	1400	354	355.039	321.904	123.755	37.2711	688.981	643.04	330.166	374.583	297.943	250.252	155.84	21.345	9.03955	62.7118	9.03955
2020-10-29 RUES2-GLR p62 Day3 DE	D	20	PluriControl	1400	427	369.647	313.645	149.349	64.9675	618.086	585.18	279.927	327.715	331.89	248.89	193.494	64.4546	17.5644	58.0796	17.096
2020-10-29 RUES2-GLR p62 Day3 DE	D	21	PluriControl	1400	249	358.247	303.132	143.152	46.9169	622.662	562.902	267.816	308.769	322.714	249.346	182.098	68.3879	15.261	62.249	18.4739
2020-10-29 RUES2-GLR p62 Day3 DE	D	22	PluriControl	1400	221	463.29	383.237	184.271	140.851	767.561	733.221	324.89	298.427	449.58	316.963	244.448	181.045	36.1991	78.733	34.8416
2020-10-29 RUES2-GLR p62 Day3 DE	E	18	PluriControl	1400	520	416.273	345.495	193.492	70.4613	678.275	637.028	298.582	343.214	366.155	272.675	218.38	47.0681	20	62.6923	20.3846
2020-10-29 RUES2-GLR p62 Day3 DE	E	19	PluriControl	1400	208	425.483	360.888	168.642	111.821	693.036	664.231	303.382	314.17	394.785	279.514	224.101	111.9	25.4808	69.2307	27.8846
2020-10-29 RUES2-GLR p62 Day3 DE	E	20	PluriControl	1400	345	387.273	314.022	210.56	58.0512	666.257	648.966	296.491	355.959	469.194	243.176	1258.12	43.6715	15.6522	63.4782	17.1014
2020-10-29 RUES2-GLR p62 Day3 DE	E	21	PluriControl	1400	197	398.336	340.906	149.654	56.8473	670.977	641.4	264.232	312.593	358.601	264.683	203.651	47.9384	20.8122	69.5431	21.8274
2020-10-29 RUES2-GLR p62 Day3 DE	E	22	PluriControl	1400	391	343.131	318.523	107.992	49.1393	650.654	618.705	272.891	331.807	297.474	257.717	167.529	35.4282	9.46291	64.7059	9.97442
2020-10-29 RUES2-GLR p62 Day3 DE	F	18	PluriControl	2100	965	336.032	317.282	106.225	37.6462	669.001	629.253	285.207	310.657	274.386	249.159	194.384	29.3436	4.66321	64.456	4.55959
2020-10-29 RUES2-GLR p62 Day3 DE	F	19	PluriControl	2100	706	359.584	330.784	131.123	56.1542	648.085	605.089	270.654	296.878	302.317	259.205	158.349	50.2505	9.63173	64.5892	10.6232
2020-10-29 RUES2-GLR p62 Day3 DE	F	20	PluriControl	2100	835	359.057	314.599	138.521	54.5374	626.128	591.32	266.695	271.955	314.281	254.588	168.01	43.8449	13.4132	62.3952	13.5329
2020-10-29 RUES2-GLR p62 Day3 DE	F	21	PluriControl	2100	694	354.726	331.805	110.848	43.1481	674.299	648.125	255.458	284.546	301.144	274.591	124.702	23.4621	8.06916	66.8588	8.21326
2020-10-29 RUES2-GLR p62 Day3 DE	F	22	PluriControl	2100	525	326.481	296.233	111.96	43.5514	619.776	579.405	259.68	290.308	283.799	241.806	144.67	33.7099	9.71428	61.1428	10.4762
2020-10-29 RUES2-GLR p62 Day3 DE	G	18	PluriControl	2100	602	378.949	326.217	152.501	47.6137	706.757	676.005	293.464	333.849	324	252.629	181.272	47.5107	15.4485	69.9335	15.7807
2020-10-29 RUES2-GLR p62 Day3 DE	G	19	PluriControl	2100	856	387.205	330.569	158.628	74.9091	689.299	652.903	294.148	324.507	334.091	262.332	182.494	47.0807	17.6402	68.2243	16.5888
2020-10-29 RUES2-GLR p62 Day3 DE	G	20	PluriControl	2100	665	379.398	344.415	129.565	44.5729	638.656	592.147	256.766	277.489	342.98	285.615	162.104	40.6321	13.3835	63.9098	14.5865
2020-10-29 RUES2-GLR p62 Day3 DE	G	21	PluriControl	2100	568	375.698	332.778	140.902	38.3393	686.416	641.644	316.194	340.519	325.39	271.076	164.651	21.7675	13.3803	64.9648	13.2042
2020-10-29 RUES2-GLR p62 Day3 DE	G	22	PluriControl	2100	959	343.695	315.565	127.006	38.5936	684.675	617.825	305.851	314.181	296.51	258.439	147.144	22.3294	7.71637	62.6694	8.0292
2020-10-29 RUES2-GLR p62 Day3 DE	H	18	PluriControl	2100	543	406.857	349.351	157.245	38.5921	731.691	699.383	290.99	347.47	354.134	275.267	184.064	33.7973	16.3904	72.1915	18.0479
2020-10-29 RUES2-GLR p62 Day3 DE	H	19	PluriControl	2100	1059	346.413	311.048	135.726	41.8271	643.203	593.31	265.603	294.08	288.081	251.562	152.911	36.0553	8.49858	62.7951	8.59301
2020-10-29 RUES2-GLR p62 Day3 DE	H	20	PluriControl	2100	713	396.776	334.906	167.054	45.6463	703.373	677.14	289.754	314.861	350.615	271.013	191.361	25.6401	16.9705	69.2847	16.5498
2020-10-29 RUES2-GLR p62 Day3 DE	H	21	PluriControl	2100	644	405.431	312.647	766.458	48.0681	717.103	679.783	526.57	331.073	346.217	254.923	542.257	40.7418	16.4596	67.8571	15.2174
2020-10-29 RUES2-GLR p62 Day3 DE	H	22	PluriControl	2100	884	344.867	324.076	110.264	45.137	708.079	665.025	297.39	330.044	293.686	261.137	138.589	37.3667	7.80543	70.4751	8.48416
2020-10-29 RUES2-GLR p62 Day3 DE	I	18	PluriControl	2800	815	400.491	342.886	179.668	73.1189	730.396	699.181	295.298	320.076	347.978	280.92	198.135	54.92	18.5276	75.092	16.5644
2020-10-29 RUES2-GLR p62 Day3 DE	I	19	PluriControl	2800	1171	363.552	337.772	124.903	49.4714	726.145	705.879	277.227	303.42	307.677	271.42	142.028	42.1073	9.64987	75.6618	9.13749
2020-10-29 RUES2-GLR p62 Day3 DE	I	20	PluriControl	2800	1139	347.959	333.849	89.138	43.1036	646.348	597.748	252.283	273.24	292.316	275.979	105.004	34.0212	5.35557	62.7744	5.26778
2020-10-29 RUES2-GLR p62 Day3 DE	I	21	PluriControl	2800	1330	341.782	316.144	124.169	44.1629	645.144	603.072	264.658	285.89	286.319	256.28	141.647	30.9952	7.21804	63.3083	7.14286
2020-10-29 RUES2-GLR p62 Day3 DE	I	22	PluriControl	2800	1035	357.734	329.721	136.288	46.3149	680.71	650.293	300.613	320.91	304.235	263.025	159.931	37.5379	10.1449	65.7971	9.95169
2020-10-29 RUES2-GLR p62 Day3 DE	J	18	PluriControl	2800	1495	349.265	346.598	64.5145	45.7352	841.329	833.467	294.563	344.461	282.242	276.834	73.7159	32.9285	2.40803	85.1505	2.27425
2020-10-29 RUES2-GLR p62 Day3 DE	J	19	PluriControl	2800	1903	340.925	334.4	62.5838	53.9548	861.066	834.22	371.561	427.048	273.354	267.857	64.6401	40.469	1.20862	79.2958	1.10352
2020-10-29 RUES2-GLR p62 Day3 DE	J	20	PluriControl	2800	1906	346.613	333.162	87.9306	43.1644	735.076	731.142	265.69	309.747	285.712	267.021	102.416	37.065	4.35467	76.1805	4.09234
2020-10-29 RUES2-GLR p62 Day3 DE	J	21	PluriControl	2800	1812	343.905	326.248	112.762	37.1161	683.058	655.117	265.738	298.423	282.355	264.214	132.87	25.6416	5.02207	69.2605	4.63576
2020-10-29 RUES2-GLR p62 Day3 DE	J	22	PluriControl	2800	1307	327.159	294.149	123.445	38.002	645.201	612.071	264.597	311.862	278.207	240.661	149.364	36.1769	8.2632	63.5807	8.72226
2020-10-29 RUES2-GLR p62 Day3 DE	K	18	PluriControl	2800	953	346.039	317.714	129.672	46.5299	742.667	714.143	317.153	369.64	288.567	258.16	138.245	37.578	7.86988	71.0388	7.86988
2020-10-29 RUES2-GLR p62 Day3 DE	K	19	PluriControl	2800	1155	382.771	349.275	134.163	39.9205	731.415	695.921	295.351	345.72	316.425	274.577	148.298	29.5912	10.2164	70.1299	9.43723
2020-10-29 RUES2-GLR p62 Day3 DE	K	20	PluriControl	2800	1579	341.317	332.459	86.3047	46.8205	744.057	710.41	282.09	312.775	288.28	269.408	109.481	42.6855	3.60988	77.3907	4.49652
2020-10-29 RUES2-GLR p62 Day3 DE	K	21	PluriControl	2800	1327	333.971	323.572	88.0498	39.197	653.457	619.828	253.8	280.213	280.866	269.497	97.0137	24.5118	3.69254	64.8078	3.54182
2020-10-29 RUES2-GLR p62 Day3 DE	K	22	PluriControl	2800	1654	333.083	325.255	80.7256	36.1569	770.381	750.861	294.484	345.563	273.067	265.084	85.654	32.4941	3.08343	77.7509	3.02297
2020-10-29 RUES2-GLR p62 Day3 DE	L	18	PluriControl	3500	2255	352.558	332.363	102.547	44.6426	917.73	895.034	360.84	374.546	285.603	267.113	109.763	35.2622	4.21286	86.4745	3.99113
2020-10-29 RUES2-GLR p62 Day3 DE	L	19	PluriControl	3500	1703	356.867	350.767	70.6301	40.9776	715.749	691.712	255.23	286.289	294.328	285.459	79.0213	34.2584	3.05343	75.2202	2.81856
2020-10-29 RUES2-GLR p62 Day3 DE	L	20	PluriControl	3500	1729	338.444	336.027	76.978	44.5358	709.405	689.264	265.957	311.635	270.292	267.793	77.1823	37.4801	2.1978	72.701	2.02429
2020-10-29 RUES2-GLR p62 Day3 DE	L	21	PluriControl	3500	1531	337.909	332.49	78.4981	54.2276	778.592	744.803	322.044	371.568	271.851	266.049	81.933	38.0732	2.3514	74.5918	2.28609
2020-10-29 RUES2-GLR p62 Day3 DE	L	22	PluriControl	3500	2117	331.774	326.529	58.1934	42.8471	913.826	875.498	383.525	404.422	265.39	264.724	61.2424	33.1836	1.27539	84.5536	1.08644
2020-10-29 RUES2-GLR p62 Day3 DE	M	18	PluriControl	3500	1346	344.154	337.189	90.8227	39.1362	727.265	692.377	295.639	336.765	282.914	265.976	164.171	33.7684	4.30906	73.1055	4.53195
2020-10-29 RUES2-GLR p62 Day3 DE	M	19	PluriControl	3500	1869	346.864	339.225	81.8417	54.2632	827.582	809.615	309.892	338.894	279.206	273.207	88.1709	41.1436	3.26378	83.6276	3.15677
2020-10-29 RUES2-GLR p62 Day3 DE	M	20	PluriControl	3500	1834	336.577	323.472	91.4226	39.1985	744.339	704.228	295.104	332.638	274.269	259.346	97.6617	34.4364	3.81679	74.5365	3.27154
2020-10-29 RUES2-GLR p62 Day3 DE	M	21	PluriControl	3500	2079	336.157	330.645	75.3569	46.7301	781.731	769.995	308.541	369.064	268.014	264.91	75.3319	32.764	1.924	76.4791	1.7316
2020-10-29 RUES2-GLR p62 Day3 DE	M	22	PluriControl	3500	1853	337.008	325.381	95.9534	40.4794	789.781	772.816	291.015	331.195	281.287	266.957	111.446	34.4616	4.20939	80.626	4.37129
2020-10-29 RUES2-GLR p62 Day3 DE	N	18	PluriControl	3500	1640	361.975	328.73	134.622	46.2697	760.34	751.486	294.959	343.397	298.587	257.284	151.52	42.5766	9.14634	75.6707	8.78049
2020-10-29 RUES2-GLR p62 Day3 DE	N	19	PluriControl	3500	2146	350.783	343.894	82.1473	44.5136	742.428	708.706	286.03	326.288	286.334	274.154	91.8154	38.8434	2.6561	74.8369	2.60951
2020-10-29 RUES2-GLR p62 Day3 DE	N	20	PluriControl	3500	1895	363.184	352.652	86.4367	51.3306	883.372	886.813	332.832	370.927	291.233	278.395	97.4023	40.0139	3.64116	84.1161	3.58839
2020-10-29 RUES2-GLR p62 Day3 DE	N	21	PluriControl	3500	1651	322.609	315.969	76.568	43.1763	730.961	680.891	312.009	343.695	262.02	253.24	85.8435	33.698	2.30164	69.7153	2.24107
2020-10-29 RUES2-GLR p62 Day3 DE	N	22	PluriControl	3500	2172	335.859	322.156	97.0839	48.4729	854.138	839.323	340.129	372.276	277.307	263.098	112.155	38.326	3.6372	82.1363	3.68324
2020-10-29 RUES2-GLR p62 Day3 DE	C	3	DEControl	1400	18	266.771	251.315	58.4995	40.2822	260.102	232.619	88.1159	46.3401	256.801	244.422	62.0445	71.3338	0	0	0
2020-10-29 RUES2-GLR p62 Day3 DE	C	4	DEControl	1400	73	357.487	287.663	214.078	80.7172	408.331	227.6	1429.72	34.5935	261.128	256.107	49.4405	49.5885	12.3288	1.36986	0
2020-10-29 RUES2-GLR p62 Day3 DE	C	5	DEControl	1400	196	671.141	446.981	440.088	290.111	271.687	259.265	62.0968	41.3705	267.322	274.055	37.1297	31.3763	47.449	1.02041	0
2020-10-29 RUES2-GLR p62 Day3 DE	C	6	DEControl	1400	513	822.608	787.288	463.676	595.563	279.284	267.23	67.9983	39.7678	261.766	260.276	47.658	32.7328	64.3275	1.16959	0.389863
2020-10-29 RUES2-GLR p62 Day3 DE	C	7	DEControl	1400	543	885.52	800.177	545.333	618.441	287.936	276.51	64.0984	48.5477	260.59	263.33	39.2865	36.3356	64.825	1.4733	0
2020-10-29 RUES2-GLR p62 Day3 DE	C	8	DMSOControl	1400	415	716.473	553.376	460.176	378.714	275.748	266.192	66.3762	47.1437	265.773	262.964	70.5907	44.1148	52.0482	1.68675	0.722891
2020-10-29 RUES2-GLR p62 Day3 DE	C	9	DMSOControl	1400	794	1004.96	933.577	640.426	831.414	277.582	265.767	61.3522	43.3972	264.275	262.243	55.9156	32.595	65.2393	1.00756	1.38539
2020-10-29 RUES2-GLR p62 Day3 DE	C	10	DMSOControl	1400	917	859.42	738.68	552.146	587.28	305.034	274.973	525.143	51.4447	268.257	272.061	49.3969	35.8033	60.4144	0.87241	0.545256
2020-10-29 RUES2-GLR p62 Day3 DE	C	11	DMSOControl	1400	1194	865.015	823.288	486.268	601.471	290.813	276.605	67.541	49.0792	268.552	272.991	39.044	33.3459	66.9179	1.17253	0.167504
2020-10-29 RUES2-GLR p62 Day3 DE	C	12	DMSOControl	1400	824	816.586	765.865	420.87	513.373	307.075	291	72.3327	54.7472	271.083	274.722	38.1839	33.2584	68.8107	2.42718	0.364078
2020-10-29 RUES2-GLR p62 Day3 DE	C	13	SB431542	1400	315	328.579	325.765	56.3971	54.8873	269.437	262.937	62.944	37.6328	338.266	338.289	77.8808	58.5835	1.26984	2.22222	2.85714
2020-10-29 RUES2-GLR p62 Day3 DE	C	14	SB431542	1400	336	321.477	323.313	43.0642	42.4283	259.825	253.538	53.2819	31.7113	316.702	315.464	58.4443	48.1311	0.297619	0.595238	1.19048
2020-10-29 RUES2-GLR p62 Day3 DE	C	15	SB431542	1400	282	324.277	323.64	41.9061	40.9435	253.325	249.469	36.5585	27.1894	330.4	324.88	56.5173	48.504	0	0	1.06383
2020-10-29 RUES2-GLR p62 Day3 DE	C	16	SB431542	1400	406	321.727	320.964	41.6824	39.555	267.77	251.115	86.9661	28.1546	315.961	312.084	61.8235	37.4809	0.246305	2.95566	2.21675
2020-10-29 RUES2-GLR p62 Day3 DE	C	17	SB431542	1400	693	324.713	325.195	49.635	48.2794	260.724	253.618	60.5177	35.148	314.987	315.91	60.262	52.5448	0.4329	0.865801	0.721501
2020-10-29 RUES2-GLR p62 Day3 DE	D	3	DEControl	1400	1209	907.7	852.267	538.399	643.554	286.369	270.766	76.1891	50.8917	254.967	254.479	41.1833	36.9657	68.4863	2.39868	0.330852
2020-10-29 RUES2-GLR p62 Day3 DE	D	4	DEControl	1400	758	776.363	672.215	470.284	494.942	288.565	272.457	71.4068	53.0393	270.307	258.743	379.27	29.7432	57.3879	1.58311	0.395778
2020-10-29 RUES2-GLR p62 Day3 DE	D	5	DEControl	1400	816	756.023	669.58	442.781	456.415	280.234	267.82	63.2983	45.2023	254.499	253.873	37.6959	32.3147	60.7843	1.34804	0.245098
2020-10-29 RUES2-GLR p62 Day3 DE	D	6	DEControl	1400	881	1191.54	1144.87	761.554	925.928	278.008	265.861	67.284	49.034	254.812	257.514	36.224	35.9723	72.9852	1.70261	0.113507
2020-10-29 RUES2-GLR p62 Day3 DE	D	7	DEControl	1400	747	950.16	774.44	676.531	640.09	289.31	271.638	72.1116	50.828	256.112	256.248	41.4161	32.6157	61.3119	2.00803	0.133869
2020-10-29 RUES2-GLR p62 Day3 DE	D	8	DMSOControl	1400	461	913.268	716.009	623.89	587.517	288.419	277.447	59.9036	48.4558	265.85	266.459	37.4464	33.8122	58.7852	0.867679	0.21692
2020-10-29 RUES2-GLR p62 Day3 DE	D	9	DMSOControl	1400	482	789.13	684.417	452.369	504.461	290.55	274.732	83.533	48.5477	260.105	263.011	39.8275	28.4259	61.8257	2.28216	0.414938
2020-10-29 RUES2-GLR p62 Day3 DE	D	10	DMSOControl	1400	589	979.01	895.729	643.791	799.027	265.509	255.544	57.335	42.8546	252.638	252.717	37.3187	32.4675	60.9508	0.679117	0
2020-10-29 RUES2-GLR p62 Day3 DE	D	11	DMSOControl	1400	858	844.548	734.424	502.105	539.945	310.607	293.594	79.1953	52.1645	269.419	272.654	41.0013	37.4564	64.4522	4.07925	0.2331
2020-10-29 RUES2-GLR p62 Day3 DE	D	12	DMSOControl	1400	770	1033.78	1001.46	580.502	668.644	301.302	288.739	73.0212	48.6901	273.772	274.168	43.9339	32.7929	74.9351	1.2987	0.38961
2020-10-29 RUES2-GLR p62 Day3 DE	D	13	SB431542	1400	249	334.447	338.991	52.3399	50.6041	275.251	265.488	64.9582	37.2681	336.285	333.011	63.0348	45.7679	0.803213	2.00803	2.00803
2020-10-29 RUES2-GLR p62 Day3 DE	D	14	SB431542	1400	462	323.215	324.083	48.356	48.8954	260.885	257.362	51.0664	34.7625	323.446	323.079	63.5915	51.421	0.21645	1.08225	1.94805
2020-10-29 RUES2-GLR p62 Day3 DE	D	15	SB431542	1400	250	322.627	321.909	56.6601	66.9735	256.847	250.359	75.6297	39.237	327.396	326.225	82.5763	67.8875	0	1.6	2.8
2020-10-29 RUES2-GLR p62 Day3 DE	D	16	SB431542	1400	330	313.378	309.95	56.3207	59.7243	254.254	245.957	62.0019	31.7439	307.95	299.617	70.6003	51.8584	0.909091	1.51515	2.12121
2020-10-29 RUES2-GLR p62 Day3 DE	D	17	SB431542	1400	621	318.719	320.457	43.8177	45.9873	260.414	250.514	56.6831	37.575	315.992	319.511	54.2473	42.6411	0.161031	0.483092	0.966183
2020-10-29 RUES2-GLR p62 Day3 DE	E	3	DEControl	1400	648	988.097	790.957	723.428	692.167	268.832	252.97	72.6212	46.0169	243.664	242.679	40.0851	36.6603	60.9568	1.23457	0
2020-10-29 RUES2-GLR p62 Day3 DE	E	4	DEControl	1400	1334	985.995	922.909	590.143	713.327	288.45	271.714	76.0454	47.4069	252.577	254.266	36.6869	33.2777	70.6147	2.32384	0.0749625
2020-10-29 RUES2-GLR p62 Day3 DE	E	5	DEControl	1400	650	741.292	697.098	422.277	491.772	283.031	265.455	143.657	44.1185	261.973	255.677	249.597	33.7551	60.7692	1.53846	0.153846
2020-10-29 RUES2-GLR p62 Day3 DE	E	6	DEControl	1400	981	1124.17	1107.19	679.677	840.13	291.472	275.764	73.8352	52.8591	261.3	264.559	33.2213	35.5216	72.9867	1.83486	0
2020-10-29 RUES2-GLR p62 Day3 DE	E	7	DEControl	1400	604	901.614	793.245	595.823	666.112	278.63	262.273	65.332	45.8954	251.186	252.813	37.934	32.1102	62.9139	1.15894	0.165563
2020-10-29 RUES2-GLR p62 Day3 DE	E	8	DMSOControl	1400	825	1034.58	882.939	711.398	754.672	308.033	292.196	78.9725	54.5967	269.838	272.283	38.8566	36.6247	64.7273	3.0303	0.242424
2020-10-29 RUES2-GLR p62 Day3 DE	E	9	DMSOControl	1400	712	691.498	549.179	391.986	333.521	285.901	274.507	60.5074	43.1118	263.353	263.998	44.6437	31.0167	55.0562	1.40449	0.421348
2020-10-29 RUES2-GLR p62 Day3 DE	E	10	DMSOControl	1400	469	735.867	714.432	364.022	430.07	274.569	262.358	60.1139	46.4261	260.953	262.699	44.693	38.0524	67.3774	0.426439	0.21322
2020-10-29 RUES2-GLR p62 Day3 DE	E	11	DMSOControl	1400	571	668.363	498.427	399.755	276.954	287.442	270.385	73.1307	50.0985	260.596	264.066	38.2067	38.2763	49.9124	2.45184	0.175131
2020-10-29 RUES2-GLR p62 Day3 DE	E	12	DMSOControl	1400	302	542.596	390.548	318.331	150.547	294.422	277.921	71.1896	45.1214	270.986	272.161	40.5954	28.8292	35.0993	1.98675	0.331126
2020-10-29 RUES2-GLR p62 Day3 DE	E	13	SB431542	1400	740	346.528	348.207	45.0184	47.7345	275.512	272.628	51.8541	32.9515	356.406	357.382	59.4095	49.951	0.135135	0.810811	1.62162
2020-10-29 RUES2-GLR p62 Day3 DE	E	14	SB431542	1400	375	338.57	338.172	49.7619	49.5099	268.709	260.218	59.6633	32.7299	347.681	345.423	61.0439	58.3181	0	1.6	1.06667
2020-10-29 RUES2-GLR p62 Day3 DE	E	15	SB431542	1400	260	309.557	302.111	52.3637	64.9038	250.845	239.86	55.7596	39.8812	306.019	301.853	58.9942	63.9861	0	0.384615	0.384615
2020-10-29 RUES2-GLR p62 Day3 DE	E	16	SB431542	1400	364	312.91	311.536	44.6266	37.2207	243.627	237.017	43.3402	27.1093	308.926	306.941	56.9602	43.4394	0.274725	0.274725	1.0989
2020-10-29 RUES2-GLR p62 Day3 DE	E	17	SB431542	1400	495	329.204	330.555	49.9798	50.2068	263.021	254.211	65.5133	40.171	322.623	320.353	65.3403	55.9459	0.20202	1.41414	1.61616
2020-10-29 RUES2-GLR p62 Day3 DE	F	3	DEControl	2100	2160	1024.16	981.699	581.757	661.899	299.316	283.897	76.7416	52.4255	261.994	262.812	39.7529	35.3185	75.2315	2.5463	0.231481
2020-10-29 RUES2-GLR p62 Day3 DE	F	4	DEControl	2100	2402	1320.63	1284.32	784.666	897.932	298.803	280.657	78.291	52.0341	261.042	263.654	33.7376	34.3837	77.4355	2.53955	0.041632
2020-10-29 RUES2-GLR p62 Day3 DE	F	5	DEControl	2100	2063	859.278	806.95	496.108	627.559	297.3	279.694	77.3563	52.0986	259.586	262.419	38.046	34.6736	65.8749	2.95686	0.242365
2020-10-29 RUES2-GLR p62 Day3 DE	F	6	DEControl	2100	2109	1386.28	1317.56	847.376	943.842	299.395	282.333	79.6453	48.6782	268.512	270.106	41.9612	39.873	79.8008	2.37079	0.189663
2020-10-29 RUES2-GLR p62 Day3 DE	F	7	DEControl	2100	1556	958.723	928.6	545.024	680.715	313.155	295.377	80.8305	57.7169	270.142	273.353	36.8697	36.4697	71.2725	3.27763	0.0642673
2020-10-29 RUES2-GLR p62 Day3 DE	F	8	DMSOControl	2100	1396	954.065	844.343	586.273	647.297	313.773	298.236	74.2214	52.1556	272.259	274.134	37.8593	37.8078	69.4126	3.08023	0.143266
2020-10-29 RUES2-GLR p62 Day3 DE	F	9	DMSOControl	2100	2160	1116.06	1020.11	719.562	897.653	289.398	277.39	65.36	46.3083	262.266	265.254	35.264	31.3941	69.5833	1.15741	0.185185
2020-10-29 RUES2-GLR p62 Day3 DE	F	10	DMSOControl	2100	1996	1581.57	1507.61	1020.06	1091.94	303.288	283.2	83.3539	52.3714	268.687	271.892	39.0807	36.0605	81.0621	3.25651	0.250501
2020-10-29 RUES2-GLR p62 Day3 DE	F	11	DMSOControl	2100	1800	1023.45	936.837	619.285	720.968	311.074	290.498	81.6056	50.9073	269.274	271.901	34.527	36.9798	71.6111	3.05556	0.0555556
2020-10-29 RUES2-GLR p62 Day3 DE	F	12	DMSOControl	2100	1616	963.254	912.434	510.381	568.745	312.655	300.853	75.3188	52.0103	277.173	281.351	36.9668	36.3719	75.7426	2.66089	0.0618812
2020-10-29 RUES2-GLR p62 Day3 DE	F	13	SB431542	2100	1079	337.099	336.285	47.2939	48.7879	276.596	268.049	59.5533	38.6973	348.98	343.604	60.5429	53.6375	0.0926784	1.20482	1.76089
2020-10-29 RUES2-GLR p62 Day3 DE	F	14	SB431542	2100	1180	313.044	313.615	42.7042	44.2571	248.069	242.612	57.7818	30.4689	301.737	302.202	49.29	47.9666	0.0847458	1.01695	0.423729
2020-10-29 RUES2-GLR p62 Day3 DE	F	15	SB431542	2100	1020	326.82	328.623	48.2717	52.4625	253.634	253.686	42.338	33.3859	347.118	348.202	66.6892	65.7481	0.294118	0.490196	1.27451
2020-10-29 RUES2-GLR p62 Day3 DE	F	16	SB431542	2100	820	322.83	323.034	48.2862	47.4076	263.562	259.415	51.2151	30.486	330.088	329.821	58.7447	48.633	0.243902	0.609756	1.34146
2020-10-29 RUES2-GLR p62 Day3 DE	F	17	SB431542	2100	905	315.428	315.526	42.4189	41.6774	255.661	254.426	42.9229	30.3459	336.88	333.787	61.7065	51.4195	0.110497	0.662983	1.10497
2020-10-29 RUES2-GLR p62 Day3 DE	G	3	DEControl	2100	2049	1883.12	1808.84	1180.55	1124.43	297.791	283.088	74.4556	52.8058	259.359	260.347	38.8038	35.0027	84.8707	2.39141	0.292826
2020-10-29 RUES2-GLR p62 Day3 DE	G	4	DEControl	2100	1752	1291.29	1237.64	846.012	1013.65	284.357	268.096	70.1063	48.8754	250.304	253.141	34.777	34.2214	73.4018	1.48402	0.0570776
2020-10-29 RUES2-GLR p62 Day3 DE	G	5	DEControl	2100	2165	1248.39	1194.15	766.279	920.769	295.408	277.316	76.607	47.3053	250.771	254.838	35.7171	31.0041	75.9815	2.90993	0.184757
2020-10-29 RUES2-GLR p62 Day3 DE	G	6	DEControl	2100	1819	1163.27	1090.29	755.95	931.971	298.1	281.949	75.007	49.0518	263.289	264.701	35.5977	34.463	70.5333	2.47389	0.0549753
2020-10-29 RUES2-GLR p62 Day3 DE	G	7	DEControl	2100	2332	1465.85	1386.11	977.479	1129.25	301.206	281.149	84.0205	52.2164	263.325	266.94	33.8196	33.4919	76.5866	3.00172	0
2020-10-29 RUES2-GLR p62 Day3 DE	G	8	DMSOControl	2100	1892	907.002	834.121	549.888	627.103	295.605	284.315	67.3587	48.4002	263.562	267.389	35.9845	36.8137	68.4989	1.74419	0.0528541
2020-10-29 RUES2-GLR p62 Day3 DE	G	9	DMSOControl	2100	2362	898.054	825.871	513.671	636.898	313.86	298.185	77.8214	54.9807	269.157	274.514	35.2057	34.2918	67.4852	3.21761	0.042337
2020-10-29 RUES2-GLR p62 Day3 DE	G	10	DMSOControl	2100	2142	1163.85	1089.11	761.972	935.447	304.175	285.658	78.4708	54.341	265.525	269.663	37.2679	34.9441	70.3081	3.22129	0.0933707
2020-10-29 RUES2-GLR p62 Day3 DE	G	11	DMSOControl	2100	2255	1304.31	1243.23	809.847	941.673	308.208	292.159	85.5479	53.0919	274.721	276.042	99.8496	37.1762	76.7184	2.74945	0.354767
2020-10-29 RUES2-GLR p62 Day3 DE	G	12	DMSOControl	2100	1564	867.139	810.905	493.733	613.558	316.015	298.038	78.5713	54.6042	272.04	273.555	37.6106	35.3215	65.7289	3.19693	0.127877
2020-10-29 RUES2-GLR p62 Day3 DE	G	13	SB431542	2100	1327	328.735	329.009	48.8902	47.8835	261.956	257.884	55.8741	33.3111	320.263	321.878	59.7884	48.4721	0.527506	0.753579	1.05501
2020-10-29 RUES2-GLR p62 Day3 DE	G	14	SB431542	2100	907	332.678	331.391	51.4527	47.0488	269.606	264.421	57.3481	37.701	342.754	337.472	67.0036	56.7599	0.551268	0.771775	1.6538
2020-10-29 RUES2-GLR p62 Day3 DE	G	15	SB431542	2100	1288	320.024	319.849	48.8738	48.1912	257.13	252.143	50.2122	33.9597	317.239	316.438	60.7585	49.8695	0.388199	0.621118	1.08696
2020-10-29 RUES2-GLR p62 Day3 DE	G	16	SB431542	2100	732	332.798	332.786	50.7393	54.7443	282.761	275.795	52.1273	41.0984	394.901	362.341	453.451	73.514	0.273224	1.22951	8.33333
2020-10-29 RUES2-GLR p62 Day3 DE	G	17	SB431542	2100	1146	335.54	337.184	48.7579	44.7953	272.993	266.993	61.2981	30.867	343.518	343.349	62.9825	49.054	0.4363	1.04712	1.65794
2020-10-29 RUES2-GLR p62 Day3 DE	H	3	DEControl	2100	1864	961.687	913.072	526.244	636.744	313.711	295.021	85.5718	52.8984	266.773	270.387	38.8529	34.1695	73.176	2.57511	0.107296
2020-10-29 RUES2-GLR p62 Day3 DE	H	4	DEControl	2100	1771	1485.42	1347.81	1030.41	1231.4	301.748	279.322	93.5679	51.6553	258.192	259.728	40.0769	33.4564	75.3811	3.55731	0.338792
2020-10-29 RUES2-GLR p62 Day3 DE	H	5	DEControl	2100	2245	1341.68	1271.67	836.932	942.747	299.144	279.549	79.2998	51.7457	260.151	263.021	35.0887	35.4297	78.1292	2.85078	0.0445434
2020-10-29 RUES2-GLR p62 Day3 DE	H	6	DEControl	2100	1551	1128.09	1073.84	721.628	941.958	294.217	282.058	70.9334	50.5626	259.221	262.703	35.1935	33.5157	68.7943	2.12766	0.128949
2020-10-29 RUES2-GLR p62 Day3 DE	H	7	DEControl	2100	2525	1177.63	1129.07	713.449	833.119	303.772	286.238	83.0684	51.9696	267.682	271.385	34.6941	35.019	75.2871	2.61386	0
2020-10-29 RUES2-GLR p62 Day3 DE	H	8	DMSOControl	2100	2350	994.906	943.524	569.228	669.965	294.123	279.118	73.3754	47.9213	261.679	264.507	36.325	34.7922	72.4681	2.38298	0.0851064
2020-10-29 RUES2-GLR p62 Day3 DE	H	9	DMSOControl	2100	1539	1213.62	1057.29	847.597	956.274	303.331	289.316	76.4117	51.3943	263.241	266.18	38.5475	38.5076	70.8902	2.859	0.129955
2020-10-29 RUES2-GLR p62 Day3 DE	H	10	DMSOControl	2100	1073	1150.07	992.856	805.165	907.639	303.341	289.885	71.2529	49.5781	266.2	267.3	35.2606	30.89	66.4492	1.30475	0.0931966
2020-10-29 RUES2-GLR p62 Day3 DE	H	11	DMSOControl	2100	1763	1114.11	995.271	758.036	864.252	310.568	294.805	73.9744	53.7531	268.539	272.661	37.2378	35.3066	69.2002	2.66591	0.0567215
2020-10-29 RUES2-GLR p62 Day3 DE	H	12	DMSOControl	2100	1959	1019.96	952.373	617.859	705.15	305.367	292.365	67.8076	49.2668	275.231	280.602	40.1626	36.2066	71.9755	2.34814	0.102093
2020-10-29 RUES2-GLR p62 Day3 DE	H	13	SB431542	2100	1469	328.173	327.722	42.454	41.6359	262.045	257.669	49.9496	33.1524	326.024	325.47	50.5367	50.5819	0.0680735	1.0211	0.408441
2020-10-29 RUES2-GLR p62 Day3 DE	H	14	SB431542	2100	908	336.846	336.283	43.1534	43.1689	273.257	267.817	51.7874	34.1094	343.434	343.474	52.8198	47.163	0.110132	0.881057	0.550661
2020-10-29 RUES2-GLR p62 Day3 DE	H	15	SB431542	2100	837	319.39	314.723	47.3929	47.8776	259.94	252.876	50.3618	33.9056	315.661	313.128	54.6755	45.3646	0.238949	0.83632	0.955794
2020-10-29 RUES2-GLR p62 Day3 DE	H	16	SB431542	2100	1507	328.547	329.624	46.6888	47.0355	264.719	259.796	53.6996	29.3021	336.273	337.436	58.9048	50.1282	0.265428	0.995355	1.52621
2020-10-29 RUES2-GLR p62 Day3 DE	H	17	SB431542	2100	1046	316.424	318.926	44.8367	44.7515	253.46	249.57	54.5109	29.4578	312.621	315.137	55.0333	47.6211	0.191205	0.764818	0.669216
2020-10-29 RUES2-GLR p62 Day3 DE	I	3	DEControl	2800	2538	1250.96	1161.62	791.545	881.035	292.451	278.348	70.4737	47.1022	285.787	262.526	1285.83	36.7047	76.2017	2.00946	0.157604
2020-10-29 RUES2-GLR p62 Day3 DE	I	4	DEControl	2800	2152	976.996	950.521	519.237	585.907	301.16	285.132	75.8365	47.0044	263.696	267.127	35.1836	31.7721	75.697	2.7881	0.139405
2020-10-29 RUES2-GLR p62 Day3 DE	I	5	DEControl	2800	2842	1477.58	1425.47	917.521	1015.49	289.981	273.879	72.3695	49.716	256.961	258.475	34.2018	33.5082	79.1344	2.18156	0.070373
2020-10-29 RUES2-GLR p62 Day3 DE	I	6	DEControl	2800	2589	1224.73	1195.15	696.423	781.301	312.337	295.015	80.5369	50.8013	269.157	271.956	34.1042	35.237	79.4515	3.05137	0
2020-10-29 RUES2-GLR p62 Day3 DE	I	7	DEControl	2800	2697	1545.98	1461.79	1020.79	1186.67	309.329	286.97	93.933	54.0645	264.845	266.95	37.2336	34.8337	78.0126	4.11568	0.185391
2020-10-29 RUES2-GLR p62 Day3 DE	I	8	DMSOControl	2800	2753	1363.59	1293.47	868.073	986.025	298.765	286.43	72.9596	45.3231	274.046	277.561	37.6589	38.6662	77.9876	1.92517	0.108972
2020-10-29 RUES2-GLR p62 Day3 DE	I	9	DMSOControl	2800	2274	1108.6	1004	731.023	840.346	304.204	289.195	75.4735	48.7716	320.629	273.231	1752.08	36.1851	69.9208	2.6825	0.131926
2020-10-29 RUES2-GLR p62 Day3 DE	I	10	DMSOControl	2800	1894	1595.5	1435.26	1114.38	1292.11	301.051	285.264	80.0782	51.3328	262.473	264.915	37.0075	34.7129	77.0327	2.74551	0.105597
2020-10-29 RUES2-GLR p62 Day3 DE	I	11	DMSOControl	2800	2184	1471.86	1330.11	964.061	1121.33	309.821	293.928	84.5668	53.9451	273.24	277.639	40.2439	37.9894	78.4341	3.57143	0.0915751
2020-10-29 RUES2-GLR p62 Day3 DE	I	12	DMSOControl	2800	2647	1280.99	1221.33	770.822	889.931	314.542	298.894	83.4463	51.805	275.009	279.449	36.9884	37.6803	77.8995	3.1734	0.0755572
2020-10-29 RUES2-GLR p62 Day3 DE	I	13	SB431542	2800	1246	327.045	326.32	45.6799	42.9865	265.048	261.741	47.0338	32.4074	343.004	344.195	56.8105	52.8599	0.24077	0.642055	1.1236
2020-10-29 RUES2-GLR p62 Day3 DE	I	14	SB431542	2800	806	327.258	323.947	50.4786	51.1178	262.395	256.947	51.2993	34.761	342.997	340.856	61.832	60.711	0.248139	0.496278	1.36476
2020-10-29 RUES2-GLR p62 Day3 DE	I	15	SB431542	2800	1716	328.786	327.617	43.4674	42.8627	266.49	264.151	39.1542	30.4971	349.949	346.325	54.9798	48.911	0.0582751	0.174825	1.22378
2020-10-29 RUES2-GLR p62 Day3 DE	I	16	SB431542	2800	1874	325.056	324.464	45.0054	44.5136	263.424	257.571	57.3786	35.7106	327.824	328.019	54.2266	48.6864	0.213447	0.640341	0.800427
2020-10-29 RUES2-GLR p62 Day3 DE	I	17	SB431542	2800	1687	327.48	327.742	48.8519	49.418	277.053	274.712	53.6657	37.7455	357.192	355.819	70.1257	57.7161	0.414938	1.00771	2.01541
2020-10-29 RUES2-GLR p62 Day3 DE	J	3	DEControl	2800	2914	1316.73	1260.4	790.12	905.546	305.839	289.64	77.5666	51.3484	264.328	266.483	35.1703	36.1458	79.1009	2.77968	0.0343171
2020-10-29 RUES2-GLR p62 Day3 DE	J	4	DEControl	2800	2621	1124.65	1074.07	632.906	718.631	310.174	293.707	75.7518	51.9977	267.178	270.586	35.1592	35.6803	77.4514	3.01412	0.0381534
2020-10-29 RUES2-GLR p62 Day3 DE	J	5	DEControl	2800	2682	1405.05	1247.68	943.897	975.822	305.305	288.401	75.892	53.5797	263.49	266.973	38.7088	33.8159	78.9336	2.79642	0.0745712
2020-10-29 RUES2-GLR p62 Day3 DE	J	6	DEControl	2800	2571	989.922	976.413	517.271	597.454	321.359	300.703	85.5408	54.8518	276.345	274.965	146.336	33.8744	75.6904	4.2007	0.194477
2020-10-29 RUES2-GLR p62 Day3 DE	J	7	DEControl	2800	2694	1282.24	1179.45	878.405	992.914	317.465	296.32	88.5169	59.2973	268.13	271.2	34.8819	34.4504	73.4595	4.15739	0.074239
2020-10-29 RUES2-GLR p62 Day3 DE	J	8	DMSOControl	2800	2145	1323.55	1186.7	924.425	1085.99	303.634	290.217	77.967	52.9985	267.685	269.095	38.8103	38.5684	73.1002	2.70396	0.0932401
2020-10-29 RUES2-GLR p62 Day3 DE	J	9	DMSOControl	2800	2492	1676.84	1508.05	1145.09	1271.88	313.557	294.981	80.4342	52.6886	271.874	273.963	39.3957	34.4089	80.0562	3.5313	0.160514
2020-10-29 RUES2-GLR p62 Day3 DE	J	10	DMSOControl	2800	3333	1296.42	1229.35	751.275	854.6	310.711	297.709	70.6738	50.1875	272.41	276.156	36.542	35.4579	79.748	2.10021	0.030003
2020-10-29 RUES2-GLR p62 Day3 DE	J	11	DMSOControl	2800	2158	1092.97	1015.15	654.882	768.009	316.432	303.675	74.1309	55.5486	275.945	278.56	38.0316	36.1636	74.05	2.87303	0.0463392
2020-10-29 RUES2-GLR p62 Day3 DE	J	12	DMSOControl	2800	2064	1084.55	957.013	703.389	808.495	317.864	301.033	86.7955	56.5849	273.427	276.275	38.1058	37.7722	71.124	3.14922	0.145349
2020-10-29 RUES2-GLR p62 Day3 DE	J	13	SB431542	2800	1659	324.236	324.439	47.048	42.7849	265.505	263.332	57.7457	31.0723	336.397	336.645	62.8221	49.1171	0.602773	0.602773	1.44665
2020-10-29 RUES2-GLR p62 Day3 DE	J	14	SB431542	2800	1096	328.914	329.728	47.07	46.2037	275.284	268.063	66.3911	31.9649	339.848	342.012	59.8369	54.9993	0.182482	1.55109	1.09489
2020-10-29 RUES2-GLR p62 Day3 DE	J	15	SB431542	2800	1102	326.192	325.668	71.6344	45.9599	265.455	261.252	73.1953	30.7321	338.474	335.932	83.1968	49.759	0.0907441	0.725953	1.17967
2020-10-29 RUES2-GLR p62 Day3 DE	J	16	SB431542	2800	1302	316.956	316.325	42.1082	40.2696	262.989	259.906	61.5186	28.0456	334.617	333.671	53.7011	47.6737	0.15361	0.460829	0.537634
2020-10-29 RUES2-GLR p62 Day3 DE	J	17	SB431542	2800	1393	313.076	314.493	43.923	43.8612	259.91	260.33	41.8648	30.9834	340.516	341.433	62.2931	54.8918	0.0717875	0.358938	0.933238
2020-10-29 RUES2-GLR p62 Day3 DE	K	3	DEControl	2800	3312	1107.54	1081.54	606.099	689.781	304.435	288.691	77.2741	48.9821	267.507	270.738	34.5581	33.1176	77.7778	2.95894	0.120773
2020-10-29 RUES2-GLR p62 Day3 DE	K	4	DEControl	2800	2715	1436.64	1358.91	912.413	1009.11	305.752	289.658	77.931	47.0978	268.25	272.312	33.1352	33.4949	78.6372	2.6151	0
2020-10-29 RUES2-GLR p62 Day3 DE	K	5	DEControl	2800	2536	1655.51	1504.37	1176.56	1378.55	292.79	275.277	79.3202	47.9932	259.803	263.309	36.9526	34.0368	76.4984	2.72082	0.197161
2020-10-29 RUES2-GLR p62 Day3 DE	K	6	DEControl	2800	2767	1401.09	1272.83	894.365	995.793	306.652	287.071	81.2089	50.8591	266.878	268.87	36.0531	34.2214	78.605	3.28876	0.108421
2020-10-29 RUES2-GLR p62 Day3 DE	K	7	DEControl	2800	2671	1358.06	1266.64	895.964	1021.3	311.843	293.872	81.9088	54.4678	270.846	272.843	38.2556	37.4268	76.3384	3.96855	0.262074
2020-10-29 RUES2-GLR p62 Day3 DE	K	8	DMSOControl	2800	2375	1124.87	1061.88	682.789	830.241	301.121	284.647	76.2507	50.0615	266.215	269.311	34.7438	34.3919	73.3474	2.61053	0.0842105
2020-10-29 RUES2-GLR p62 Day3 DE	K	9	DMSOControl	2800	2246	1437.31	1246.28	1059.76	1232.5	297.842	282.085	79.4903	51.1208	264.088	266.017	37.1244	36.7611	71.7275	2.84951	0.133571
2020-10-29 RUES2-GLR p62 Day3 DE	K	10	DMSOControl	2800	2500	1579.66	1503.87	1033.71	1188.22	312.051	291.669	93.297	51.7731	269.905	272.327	37.5085	36.9116	79.24	3.6	0.12
2020-10-29 RUES2-GLR p62 Day3 DE	K	11	DMSOControl	2800	2370	1669.65	1569.92	1064.9	1158.08	297.269	287.094	66.6906	43.3208	270.485	273.182	41.178	36.9568	81.2658	1.81435	0.253165
2020-10-29 RUES2-GLR p62 Day3 DE	K	12	DMSOControl	2800	3138	1335.96	1262.89	867.503	1004.18	308.899	290.66	84.5973	51.5522	271.407	273.875	36.0753	33.4178	75.4621	2.8362	0.0637349
2020-10-29 RUES2-GLR p62 Day3 DE	K	13	SB431542	2800	1714	322.357	322.727	42.6326	44.7041	256.275	254.001	45.7919	30.2361	332.918	333.124	53.7828	54.5085	0.175029	0.700117	0.525087
2020-10-29 RUES2-GLR p62 Day3 DE	K	14	SB431542	2800	1231	319.945	322.409	43.398	45.3705	259.828	258.172	47.3763	38.7715	339.685	341.86	62.1322	63.3782	0.0812348	0.487409	0.974817
2020-10-29 RUES2-GLR p62 Day3 DE	K	15	SB431542	2800	1673	325.447	325.574	43.9851	43.8775	264.371	260.972	42.9237	33.059	340.355	340.076	55.6556	50.0051	0.179319	0.41841	0.896593
2020-10-29 RUES2-GLR p62 Day3 DE	K	16	SB431542	2800	1120	322.997	322.203	47.1554	49.1245	266.6	265.758	49.4975	34.2555	345.6	344.802	63.0745	56.1186	0.178571	0.446429	1.25
2020-10-29 RUES2-GLR p62 Day3 DE	K	17	SB431542	2800	1656	328.494	328.237	44.555	43.776	271.729	264.725	59.5452	32.3585	352.713	352.791	60.2343	51.5804	0.301932	1.26812	1.26812
2020-10-29 RUES2-GLR p62 Day3 DE	L	3	DEControl	3500	2928	1360.27	1301.82	825.056	942.585	312.213	294.44	83.5123	52.5737	265.957	268.038	35.5851	34.4067	78.791	3.17623	0.102459
2020-10-29 RUES2-GLR p62 Day3 DE	L	4	DEControl	3500	3065	1644.32	1602.22	992.001	1080.19	295.713	281.15	74.0637	45.5484	261.224	263.652	35.1419	35.4771	82.0555	1.89233	0.0978793
2020-10-29 RUES2-GLR p62 Day3 DE	L	5	DEControl	3500	2906	1254.39	1189.8	803.859	927.693	305.524	283.876	94.1817	53.9748	263.804	266.457	44.2607	37.7033	75.1204	3.81968	0.0688231
2020-10-29 RUES2-GLR p62 Day3 DE	L	6	DEControl	3500	3321	1840.27	1778.75	1101.69	1236.41	308.27	292.337	81.8505	49.1882	267.258	270.992	35.5129	33.314	84.312	3.01114	0.120446
2020-10-29 RUES2-GLR p62 Day3 DE	L	7	DEControl	3500	4044	1555.31	1498.91	953.61	1068.65	321.128	297.758	92.7827	53.957	277.825	279.344	125.863	34.7047	80.3165	4.67359	0.12364
2020-10-29 RUES2-GLR p62 Day3 DE	L	8	DMSOControl	3500	3226	941.475	895.823	513.029	592.815	297.499	283.44	72.7036	48.8205	266.366	268.373	40.2667	36.5839	73.9306	2.20087	0.0929944
2020-10-29 RUES2-GLR p62 Day3 DE	L	9	DMSOControl	3500	2044	1279.51	1170.89	859.114	1051.61	315.261	297.007	94.3676	47.9806	277.799	278.762	40.2826	36.638	71.9178	3.7182	0.391389
2020-10-29 RUES2-GLR p62 Day3 DE	L	10	DMSOControl	3500	2480	1232.81	1129.55	833.197	1020.61	311.026	293.937	87.3861	59.4263	265.356	268.026	38.796	36.7151	71.3306	3.3871	0.16129
2020-10-29 RUES2-GLR p62 Day3 DE	L	11	DMSOControl	3500	2710	1548.02	1433.15	1018.13	1167.14	313.33	301.509	73.9984	51.3736	277.81	281.447	40.942	37.0109	79.0775	2.61993	0.258303
2020-10-29 RUES2-GLR p62 Day3 DE	L	12	DMSOControl	3500	2743	1452.19	1379.91	943.106	1119.94	318.317	302.429	85.3586	51.7679	278.026	282.441	36.5837	37.1421	76.7408	3.53627	0.0364564
2020-10-29 RUES2-GLR p62 Day3 DE	L	13	SB431542	3500	1381	333.567	331.724	47.1305	45.7575	272.823	268.712	45.9264	34.7536	370.392	364.551	73.1931	61.1484	0.289645	0.434468	3.8378
2020-10-29 RUES2-GLR p62 Day3 DE	L	14	SB431542	3500	1561	329.809	329.854	44.0649	45.4283	271.955	268.416	44.0553	29.6283	354.658	354.598	54.8412	50.3639	0.128123	0.44843	0.960922
2020-10-29 RUES2-GLR p62 Day3 DE	L	15	SB431542	3500	1647	322.991	321.689	44.6251	45.2919	263.99	261.394	48.1552	30.1057	342.681	341.92	57.9639	50.5107	0.242866	0.85003	0.971463
2020-10-29 RUES2-GLR p62 Day3 DE	L	16	SB431542	3500	1542	323.731	323.339	44.9455	47.0229	270.326	266.073	48.506	33.2888	355.742	353.863	61.4017	53.9318	0.194553	0.713359	1.94553
2020-10-29 RUES2-GLR p62 Day3 DE	L	17	SB431542	3500	1053	312.428	309.055	50.7463	48.5448	272.251	267.6	64.7743	55.1275	338.179	332.606	77.8904	75.6734	0.474834	1.23457	2.2792
2020-10-29 RUES2-GLR p62 Day3 DE	M	3	DEControl	3500	3165	1366.63	1291.44	872.766	1007.34	314.718	292.44	91.3231	57.6153	263.855	266.496	36.4128	36.3667	76.8088	4.23381	0.157978
2020-10-29 RUES2-GLR p62 Day3 DE	M	4	DEControl	3500	3940	1660.1	1649.86	989.182	1104.09	307.122	282.611	101.624	52.275	262.497	265.04	34.1653	34.0509	81.1167	4.31472	0.101523
2020-10-29 RUES2-GLR p62 Day3 DE	M	5	DEControl	3500	3253	1792.45	1760.04	1101.12	1186.07	302.843	288.936	72.3658	44.9213	268.177	271.512	33.8637	34.6276	81.7707	2.61297	0.0307409
2020-10-29 RUES2-GLR p62 Day3 DE	M	6	DEControl	3500	3037	1547.96	1476.02	1000.72	1082.72	308.025	288.662	84.1958	51.7917	265.675	268.314	37.51	35.3511	79.0254	3.2598	0.0987817
2020-10-29 RUES2-GLR p62 Day3 DE	M	7	DEControl	3500	2489	1546.64	1438.2	1021.43	1149.09	313.89	297.247	86.2253	53.3795	271.834	274.233	38.7896	36.1725	78.5456	3.65609	0.12053
2020-10-29 RUES2-GLR p62 Day3 DE	M	8	DMSOControl	3500	2683	1448.95	1367.83	990.21	1191.61	307.902	284.971	89.8766	52.6664	261.133	264.7	36.1879	32.6424	74.2825	4.43533	0.149087
2020-10-29 RUES2-GLR p62 Day3 DE	M	9	DMSOControl	3500	3101	1561.42	1484.79	991.628	1170.89	311.914	293.986	81.6605	53.0341	267.381	270.741	36.0214	36.0316	79.684	3.61174	0.0644953
2020-10-29 RUES2-GLR p62 Day3 DE	M	10	DMSOControl	3500	2885	1169.34	1132.28	648.166	745.155	310.244	296.991	75.5508	50.4099	277.192	281.219	38.0224	39.0057	78.7175	2.42634	0.103986
2020-10-29 RUES2-GLR p62 Day3 DE	M	11	DMSOControl	3500	1985	1468	1369.41	996.415	1152.59	312.45	298.101	80.1057	56.2736	278.78	281.306	42.1883	40.1681	76.7254	2.51889	0.151133
2020-10-29 RUES2-GLR p62 Day3 DE	M	12	DMSOControl	3500	2482	874.3	824.368	459.182	543.761	322.576	306.587	82.6861	54.1105	283.142	286.486	40.0007	40.1021	71.5955	3.94843	0.12087
2020-10-29 RUES2-GLR p62 Day3 DE	M	13	SB431542	3500	753	329.668	330.541	51.8746	50.9673	283.27	278.598	53.9472	40.6351	361.53	357.018	79.8403	63.0935	0.531208	0.796813	2.65604
2020-10-29 RUES2-GLR p62 Day3 DE	M	14	SB431542	3500	1498	326.246	326.892	48.5454	46.5855	271.631	263.582	62.4469	34.5142	349.959	349.548	65.1294	57.9185	0.400534	1.33511	1.40187
2020-10-29 RUES2-GLR p62 Day3 DE	M	15	SB431542	3500	1758	324.858	324.122	43.5022	40.8946	266.483	263.847	45.9294	27.9129	344.886	344.226	56.819	47.7597	0.568828	0.682594	0.967008
2020-10-29 RUES2-GLR p62 Day3 DE	M	16	SB431542	3500	1800	314.391	313.866	42.8985	41.4528	263.444	259.372	55.3797	29.7328	330.303	331.855	55.1619	51.2787	0.166667	0.944444	0.5
2020-10-29 RUES2-GLR p62 Day3 DE	M	17	SB431542	3500	1196	312.012	310.861	44.0293	45.9591	266.288	261.208	61.5657	31.6001	336.283	335.163	59.1359	53.1416	0.167224	0.83612	0.919732
2020-10-29 RUES2-GLR p62 Day3 DE	N	3	DEControl	3500	3582	1559.78	1501.54	904.393	949.668	319.451	298.416	85.2093	56.0682	267.24	268.475	38.8292	37.7233	83.3333	4.41094	0.307091
2020-10-29 RUES2-GLR p62 Day3 DE	N	4	DEControl	3500	3087	1300.61	1287.51	718.941	799.67	302.655	283.646	81.7553	52.6026	261.252	263.574	34.6279	35.4089	80.7904	2.91545	0.129576
2020-10-29 RUES2-GLR p62 Day3 DE	N	5	DEControl	3500	2973	1668.75	1613.33	1079.65	1273.2	318.671	293.152	103.622	55.0134	266.534	270.54	37.4423	33.6446	79.3475	5.17995	0.16818
2020-10-29 RUES2-GLR p62 Day3 DE	N	6	DEControl	3500	3310	1879.62	1816.28	1187.67	1294.58	306.324	289.343	79.0734	50.8999	266.788	268.971	34.8697	33.4008	83.3535	2.9003	0.0906344
2020-10-29 RUES2-GLR p62 Day3 DE	N	7	DEControl	3500	4193	1803.74	1746.14	1100.31	1168.92	321.119	299.065	91.5287	56.3788	271.994	274.32	35.4712	35.7188	83.7109	4.67446	0.0953971
2020-10-29 RUES2-GLR p62 Day3 DE	N	8	DMSOControl	3500	3115	1600.45	1538.44	1045.18	1207	314.655	297.5	81.6439	53.4136	272.951	276.382	38.2421	36.2911	78.0096	3.62761	0.192616
2020-10-29 RUES2-GLR p62 Day3 DE	N	9	DMSOControl	3500	2739	1385.13	1311.25	850.985	887.346	306.031	290.913	80.0208	48.7242	269.953	272.029	37.387	35.5957	81.015	2.77474	0.146039
2020-10-29 RUES2-GLR p62 Day3 DE	N	10	DMSOControl	3500	3429	1477.19	1416.98	896.823	1000.84	302.191	288.435	69.9444	48.3594	267.577	271.538	35.8737	36.082	80.4024	2.1289	0.0874891
2020-10-29 RUES2-GLR p62 Day3 DE	N	11	DMSOControl	3500	2899	1296.05	1222.67	799.644	888.522	312.507	301.62	71.4402	53.4537	276.556	279.11	42.8031	37.621	77.613	2.24215	0.275957
2020-10-29 RUES2-GLR p62 Day3 DE	N	12	DMSOControl	3500	2517	1270.57	1069.35	971.746	1012.15	312.183	298.895	73.5662	47.7012	279.688	280.367	43.328	39.9946	69.8451	2.46325	0.238379
2020-10-29 RUES2-GLR p62 Day3 DE	N	13	SB431542	3500	1704	326.823	326.644	47.2562	43.3416	278.479	266.002	131.309	31.5445	361.334	359.973	67.3955	52.6219	0.469484	2.34742	2.17136
2020-10-29 RUES2-GLR p62 Day3 DE	N	14	SB431542	3500	2177	331.913	331.463	51.4144	47.3765	273.521	262.646	293.21	28.6142	350.503	349.822	65.7859	53.172	0.551217	1.28617	1.33211
2020-10-29 RUES2-GLR p62 Day3 DE	N	15	SB431542	3500	1335	323.554	323.337	45.5931	48.3594	275.734	269.757	54.746	31.8566	361.699	360.477	61.9628	52.146	0.299625	1.1236	1.72285
2020-10-29 RUES2-GLR p62 Day3 DE	N	16	SB431542	3500	1637	315.139	313.774	44.9627	41.7589	265.322	260.56	51.2036	30.0226	336.093	333.832	62.5058	49.7902	0.183262	0.855223	1.03848
2020-10-29 RUES2-GLR p62 Day3 DE	N	17	SB431542	3500	1460	306.387	305.067	41.903	40.7418	262.288	256.74	52.4812	30.9382	320.883	318.529	55.3418	47.6826	0.342466	0.821918	0.821918
2020-10-30 RUES2-GLR p62 Day3 DE	C	18	PluriControl	1400	896	341.552	312.43	108.003	39.9939	652.321	657.914	260.284	292.409	306.873	258.772	160.083	37.1962	8.37053	69.308	10.9375
2020-10-30 RUES2-GLR p62 Day3 DE	C	19	PluriControl	1400	1051	324.318	304.382	99.2824	40.6855	684.287	682.798	266.307	274.772	269.675	242.597	133.651	32.89	5.99429	73.8344	6.56518
2020-10-30 RUES2-GLR p62 Day3 DE	C	20	PluriControl	1400	887	336.134	319.364	98.0802	35.0487	704.056	696.957	287.631	317.167	282.321	253.336	138.929	20.0596	5.86246	71.8151	6.87711
2020-10-30 RUES2-GLR p62 Day3 DE	C	21	PluriControl	1400	875	324.654	311.033	83.9447	40.8619	730.69	733.851	293.747	312.041	259.79	238.735	108.849	27.3718	4.8	75.0857	4.8
2020-10-30 RUES2-GLR p62 Day3 DE	C	22	PluriControl	1400	913	340.892	303.766	127.956	41.6018	716.321	715.636	272.056	288.615	290.497	239.002	173.868	29.4311	9.4195	75.9036	11.391
2020-10-30 RUES2-GLR p62 Day3 DE	D	18	PluriControl	1400	813	341.535	319.854	104.048	44.1133	667.846	671.569	264.558	314.203	311.855	277.09	146.661	39.6151	6.39606	68.6347	7.50307
2020-10-30 RUES2-GLR p62 Day3 DE	D	19	PluriControl	1400	1062	324.508	312.123	73.9855	33.0731	669.8	681.241	261.136	288.604	258.228	242.364	97.1009	28.5052	3.67232	72.0339	3.9548
2020-10-30 RUES2-GLR p62 Day3 DE	D	20	PluriControl	1400	880	318.409	314.719	64.7784	36.3778	697.941	694.955	270.712	288.893	260.558	251.202	89.4247	27.8032	2.84091	73.6364	3.75
2020-10-30 RUES2-GLR p62 Day3 DE	D	21	PluriControl	1400	1690	315.039	306.471	70.0509	40.4765	745.494	744.064	290.227	313.973	250.294	242.546	81.4854	34.5335	1.89349	77.9882	1.89349
2020-10-30 RUES2-GLR p62 Day3 DE	D	22	PluriControl	1400	975	320.037	311.437	79.7014	36.3593	716.95	721.375	309.86	350.657	254.541	237.687	107.875	26.623	3.69231	72.7179	4.20513
2020-10-30 RUES2-GLR p62 Day3 DE	E	18	PluriControl	1400	1011	343.35	326.199	95.0957	37.3912	681.339	687.922	279.555	321.207	289.55	265.668	123.3	25.5096	5.04451	70.6231	5.93472
2020-10-30 RUES2-GLR p62 Day3 DE	E	19	PluriControl	1400	790	322.277	313.009	70.445	42.6929	717.386	733.224	304.644	326.595	259.678	249.227	87.3692	26.3332	3.03797	73.924	3.41772
2020-10-30 RUES2-GLR p62 Day3 DE	E	20	PluriControl	1400	749	329.088	311.495	79.4821	35.7811	686.367	682.03	254.899	283.544	279.58	257.028	114.312	22.9462	4.53939	74.0988	6.67557
2020-10-30 RUES2-GLR p62 Day3 DE	E	21	PluriControl	1400	954	324.241	315.462	76.1359	41.3201	730.084	740.804	278.279	287.509	260.634	246.103	97.0816	35.4964	3.56394	77.4633	3.56394
2020-10-30 RUES2-GLR p62 Day3 DE	E	22	PluriControl	1400	538	312.347	300.379	74.6236	26.9366	721.346	735.472	304.94	339.092	249.073	235.462	86.9779	21.9373	2.7881	72.8624	2.7881
2020-10-30 RUES2-GLR p62 Day3 DE	F	18	PluriControl	2100	1657	329.54	327.133	57.2233	34.9315	773.591	779.658	275.314	306.571	268.238	264.021	69.3066	25.0767	1.6898	81.4122	1.62945
2020-10-30 RUES2-GLR p62 Day3 DE	F	19	PluriControl	2100	2212	323.147	319.911	65.9058	35.188	752.896	742.17	301.907	329.462	257.319	253.015	73.6458	25.8855	1.80832	77.9385	1.76311
2020-10-30 RUES2-GLR p62 Day3 DE	F	20	PluriControl	2100	1116	325.922	313.866	81.3224	34.0746	711.373	723.27	286.698	303.659	265.181	252.171	100.95	27.9781	3.58423	74.1935	3.49462
2020-10-30 RUES2-GLR p62 Day3 DE	F	21	PluriControl	2100	1688	315.333	312.572	62.047	38.0324	700.902	694.065	276.912	307.081	252.19	251.807	71.1485	29.91	1.06635	72.6896	1.4218
2020-10-30 RUES2-GLR p62 Day3 DE	F	22	PluriControl	2100	1854	323.837	323.512	59.6424	38.9605	789.226	788.826	309.422	313.242	255.346	253.548	66.7636	27.2435	1.34844	80.5825	1.24056
2020-10-30 RUES2-GLR p62 Day3 DE	G	18	PluriControl	2100	1559	327.081	317.664	79.1491	45.6181	731.69	737.393	282.892	320.061	263.025	253.875	88.8082	33.9145	2.82232	74.535	3.01475
2020-10-30 RUES2-GLR p62 Day3 DE	G	19	PluriControl	2100	1787	325.98	325.171	62.1031	34.6261	738.105	730.107	273.264	293.232	259.471	258.202	66.3771	26.3191	2.07051	78.5674	1.90263
2020-10-30 RUES2-GLR p62 Day3 DE	G	20	PluriControl	2100	1994	321.863	311.99	72.5899	35.7633	740.912	750.007	260.573	277.425	262.342	253.309	80.8387	28.162	3.00903	79.4383	2.70812
2020-10-30 RUES2-GLR p62 Day3 DE	G	21	PluriControl	2100	1661	316.476	309.284	51.9334	34.7596	714.748	712.119	284.818	314.164	250.703	245.885	59.7513	27.2576	1.38471	74.2926	1.62553
2020-10-30 RUES2-GLR p62 Day3 DE	G	22	PluriControl	2100	1718	302.763	297.292	53.0223	35.5542	702.487	708.969	277.346	311.136	237.485	233.876	60.9152	33.5283	1.10594	73.3411	0.989523
2020-10-30 RUES2-GLR p62 Day3 DE	H	18	PluriControl	2100	1633	339.37	331.077	78.0298	33.2681	725.447	731.284	289.753	314.433	331.328	319.363	107.163	38.4008	3.42927	75.3215	3.79669
2020-10-30 RUES2-GLR p62 Day3 DE	H	19	PluriControl	2100	1586	328.487	321.977	72.1474	44.6211	700.789	704.598	275.842	299.582	266.478	257.022	88.5575	31.89	2.83733	73.7705	3.21564
2020-10-30 RUES2-GLR p62 Day3 DE	H	20	PluriControl	2100	1900	330.226	326.433	61.3732	32.8396	798.876	798.175	293.502	316.74	259.598	253.846	69.5522	26.0048	1.42105	82.2105	1.73684
2020-10-30 RUES2-GLR p62 Day3 DE	H	21	PluriControl	2100	1555	325.238	319.018	71.0705	44.8753	770.574	784.256	288.965	306.447	260.266	254.991	82.872	34.5935	2.70096	80	2.76527
2020-10-30 RUES2-GLR p62 Day3 DE	H	22	PluriControl	2100	1152	324.65	308.789	86.0907	33.6528	717.623	726.224	277.962	302.43	261.742	243.388	109.321	33.2332	4.25347	74.7396	4.6875
2020-10-30 RUES2-GLR p62 Day3 DE	I	18	PluriControl	2800	2042	327.749	320.197	71.5604	42.0747	730.187	738.26	262.531	275.982	282.423	275.653	83.2612	34.9656	2.64447	78.8932	2.79138
2020-10-30 RUES2-GLR p62 Day3 DE	I	19	PluriControl	2800	2028	340.969	332.026	76.8737	38.0813	805.149	811.374	287.828	300.325	272.014	260.812	93.8703	27.3221	3.50099	83.6785	3.50099
2020-10-30 RUES2-GLR p62 Day3 DE	I	20	PluriControl	2800	2461	329.716	327.184	67.5179	43.3305	784.313	784.724	293.473	319.361	263.09	259.787	76.7972	30.546	1.82852	80.8614	2.03169
2020-10-30 RUES2-GLR p62 Day3 DE	I	21	PluriControl	2800	2581	322.743	319.81	58.4667	40.3979	749.535	748.833	290.772	306.929	251.246	250.734	60.7806	31.6965	0.891127	77.2956	0.929872
2020-10-30 RUES2-GLR p62 Day3 DE	I	22	PluriControl	2800	2268	327.728	327.757	45.8264	41.5847	845.003	846.037	325.827	351.579	259.462	260.432	44.3909	30.0768	0.573192	83.9065	0.573192
2020-10-30 RUES2-GLR p62 Day3 DE	J	18	PluriControl	2800	2225	336.589	328.353	76.9966	41.3304	713.258	714.827	267.382	295.536	318.492	303.647	100.407	42.9405	3.14607	75.0562	3.37079
2020-10-30 RUES2-GLR p62 Day3 DE	J	19	PluriControl	2800	2273	327.922	325.046	65.5377	38.8189	763.664	761.836	283.722	308.585	261.514	258.33	71.8364	34.1591	2.19974	79.8944	1.93577
2020-10-30 RUES2-GLR p62 Day3 DE	J	20	PluriControl	2800	2414	325.842	320.209	62.6588	43.5951	758.694	755.156	290.285	316.419	269.66	268.167	69.4767	35.5105	1.69843	78.6247	1.61558
2020-10-30 RUES2-GLR p62 Day3 DE	J	21	PluriControl	2800	2398	335.543	330.797	66.7409	44.1592	834.984	835.919	323.027	359.107	265.277	260.673	67.109	30.8292	1.58465	81.4012	1.54295
2020-10-30 RUES2-GLR p62 Day3 DE	J	22	PluriControl	2800	2198	318.247	314.649	64.524	38.091	788.49	774.173	292.058	305.89	258.204	256.699	69.266	30.0582	1.22839	82.4386	1.22839
2020-10-30 RUES2-GLR p62 Day3 DE	K	18	PluriControl	2800	2533	341.644	339.851	63.5962	35.8671	730.346	734.501	270.387	300.269	303.331	298.812	82.7636	34.724	2.01342	77.2996	2.2503
2020-10-30 RUES2-GLR p62 Day3 DE	K	19	PluriControl	2800	1640	314.316	307.024	69.8502	35.34	694.114	686.166	271.167	304.451	358.17	244.871	1169.05	33.1917	2.07317	73.4756	3.23171
2020-10-30 RUES2-GLR p62 Day3 DE	K	20	PluriControl	2800	1858	319.242	318.005	62.1793	38.8471	723.733	718.225	277.112	300.161	251.761	251.175	65.7736	26.0886	1.23789	76.211	1.18407
2020-10-30 RUES2-GLR p62 Day3 DE	K	21	PluriControl	2800	2118	321.524	317.997	60.4563	34.7321	728.217	724.966	275.996	293.886	259.039	252.352	70.0633	27.5638	1.74693	76.9122	1.69972
2020-10-30 RUES2-GLR p62 Day3 DE	K	22	PluriControl	2800	2522	319.096	308.382	83.5299	33.3051	748.612	746.341	261.991	279.577	258.788	249.922	95.0651	25.2442	2.97383	80.8485	2.77557
2020-10-30 RUES2-GLR p62 Day3 DE	L	18	PluriControl	3500	2998	343.534	334.538	78.1329	42.8197	805.983	805.414	284.893	284.882	333.049	322.276	100.355	49.1148	3.10207	84.0227	3.50233
2020-10-30 RUES2-GLR p62 Day3 DE	L	19	PluriControl	3500	2966	334.654	329.659	68.6745	32.2325	794.666	802.767	274.927	295.345	267.563	263.061	73.3524	23.6905	1.92178	83.6817	1.7532
2020-10-30 RUES2-GLR p62 Day3 DE	L	20	PluriControl	3500	2785	345.54	342.97	60.3101	41.621	852.655	849.464	316.154	332.924	274.329	274.244	61.6588	29.6298	1.54399	84.3806	1.40036
2020-10-30 RUES2-GLR p62 Day3 DE	L	21	PluriControl	3500	2629	328.948	327.035	58.0128	33.7306	822.628	829.83	291.374	314.615	258.876	257.703	61.7748	28.9018	1.44542	83.8722	1.44542
2020-10-30 RUES2-GLR p62 Day3 DE	L	22	PluriControl	3500	2611	342.527	336.278	76.1029	51.5292	923.846	934.585	360.227	374.838	268.534	260.692	84.416	34.9464	1.76178	85.8675	1.83838
2020-10-30 RUES2-GLR p62 Day3 DE	M	18	PluriControl	3500	2725	334.524	332.539	59.7705	46.094	837.719	837.94	306.067	324.547	301.963	297.774	73.1126	50.2127	1.21101	84.4037	1.24771
2020-10-30 RUES2-GLR p62 Day3 DE	M	19	PluriControl	3500	2925	333.202	324.516	65.9762	42.4409	804.181	788.249	302.71	312.67	263.023	257.394	67.6439	32.1858	1.67521	82.359	1.47009
2020-10-30 RUES2-GLR p62 Day3 DE	M	20	PluriControl	3500	2517	334.091	333.474	56.4343	41.3675	790.129	795.948	270.875	294.787	265.416	263.468	62.6034	32.205	1.23162	83.671	1.1919
2020-10-30 RUES2-GLR p62 Day3 DE	M	21	PluriControl	3500	2155	331.411	326.084	72.5477	37.0694	822.697	816.508	305.734	320.851	267.253	260.251	86.6443	29.5364	2.4594	82.877	2.32019
2020-10-30 RUES2-GLR p62 Day3 DE	M	22	PluriControl	3500	2993	331.6	328.51	63.0635	35.2043	826.169	828.418	287.717	301.208	262.657	261.097	71.9378	30.6231	1.7708	85.132	1.70398
2020-10-30 RUES2-GLR p62 Day3 DE	N	18	PluriControl	3500	2790	334.116	331.216	53.8731	45.498	864.321	867.93	305.541	317.871	268.027	268.731	58.8918	38.6284	1.14695	86.5233	1.21864
2020-10-30 RUES2-GLR p62 Day3 DE	N	19	PluriControl	3500	3458	335.997	331.247	67.9345	42.2007	858.851	874.803	304.076	324.01	267.165	264.474	73.8155	37.7285	1.64835	85.8589	1.64835
2020-10-30 RUES2-GLR p62 Day3 DE	N	20	PluriControl	3500	2844	323.693	320.039	67.2279	36.598	794.671	806.023	272.926	294.895	257.513	255.586	70.7622	28.8247	1.61744	83.052	1.6526
2020-10-30 RUES2-GLR p62 Day3 DE	N	21	PluriControl	3500	3096	343.068	335.323	65.4907	44.7545	871.777	866.694	343.901	390.769	273.609	270.481	67.7461	32.8337	1.32429	82.8488	1.29199
2020-10-30 RUES2-GLR p62 Day3 DE	N	22	PluriControl	3500	2150	329.554	322.916	79.8125	32.3681	810.375	808.325	293.122	322.946	265.668	257.481	89.2717	22.2249	2.46512	83.0233	2.51163
2020-10-30 RUES2-GLR p62 Day3 DE	C	3	DEControl	1400	607	546.603	402.016	297.402	182.575	275.902	261.401	65.4676	46.0837	249.835	249.018	48.9462	32.2673	41.5156	0.988468	0.494234
2020-10-30 RUES2-GLR p62 Day3 DE	C	4	DEControl	1400	793	565.72	463.697	289.077	236.752	282.861	273.319	60.2401	50.8843	249.917	250.668	36.9375	33.3377	46.5322	0.252207	0.126103
2020-10-30 RUES2-GLR p62 Day3 DE	C	5	DEControl	1400	992	694.22	635.803	391.69	427.878	289.967	267.968	198.741	49.2453	254.567	247.98	156.63	30.3384	61.5927	1.10887	0.705645
2020-10-30 RUES2-GLR p62 Day3 DE	C	6	DEControl	1400	715	773.131	652.652	454.161	468.617	279.879	266.487	58.7415	45.7486	307.212	254.939	1400.44	32.9967	58.8811	0.979021	0.699301
2020-10-30 RUES2-GLR p62 Day3 DE	C	7	DEControl	1400	1822	991.119	952.774	569.629	660.125	299.49	284.776	69.783	52.1201	254.99	257.717	37.2363	29.609	72.7772	1.92097	0.164654
2020-10-30 RUES2-GLR p62 Day3 DE	C	8	DMSOControl	1400	812	628.456	530.688	331.518	303.26	283.175	267.629	71.3739	46.5144	258.226	259.555	44.6587	31.7158	52.9557	1.97044	0.492611
2020-10-30 RUES2-GLR p62 Day3 DE	C	9	DMSOControl	1400	1021	799.504	735.795	441.224	533.299	296.3	277.196	81.9178	47.6745	261.746	259.907	54.6874	32.1102	64.8384	2.64447	0.783545
2020-10-30 RUES2-GLR p62 Day3 DE	C	10	DMSOControl	1400	724	847.272	723.601	551.572	563.313	295.134	275.272	81.2529	48.888	254.578	257.481	42.7237	32.6676	57.1823	2.76243	0.552486
2020-10-30 RUES2-GLR p62 Day3 DE	C	11	DMSOControl	1400	667	577.125	482.074	291.627	238.759	280.74	265.387	66.7645	46.3164	259.535	260.901	45.7133	35.833	48.1259	1.64918	0.5997
2020-10-30 RUES2-GLR p62 Day3 DE	C	12	DMSOControl	1400	1156	648.894	577.819	321.062	342.633	292.061	274.672	72.1949	49.7175	260.511	264.11	41.2121	30.5416	57.1799	1.81661	0.432526
2020-10-30 RUES2-GLR p62 Day3 DE	C	13	SB431542	1400	713	333.389	333.516	49.6702	45.0221	292.38	264.417	106.044	39.6002	356.727	347.162	89.2	71.3457	0.701262	6.45161	4.06732
2020-10-30 RUES2-GLR p62 Day3 DE	C	14	SB431542	1400	551	343.226	343.681	53.0451	55.4804	270.873	263.532	59.0672	42.4928	340.96	337.964	65.3487	63.3456	0.362976	1.27042	1.27042
2020-10-30 RUES2-GLR p62 Day3 DE	C	15	SB431542	1400	531	335.408	330.042	57.6527	61.9727	278.646	264.691	71.2024	41.1807	364.921	351.296	95.1073	74.9869	0.376648	2.25989	6.21469
2020-10-30 RUES2-GLR p62 Day3 DE	C	16	SB431542	1400	375	310.6	307.793	51.6718	41.2118	265.833	248.235	83.4517	31.1583	324.691	319.997	82.4539	49.3483	0.8	2.4	2.13333
2020-10-30 RUES2-GLR p62 Day3 DE	D	3	DEControl	1400	618	596.68	510.844	297.1	278.745	276.383	259.012	74.0704	46.0429	246.52	243.838	40.683	31.9419	50.8091	2.26537	0.161812
2020-10-30 RUES2-GLR p62 Day3 DE	D	4	DEControl	1400	1043	712.45	664.772	367.72	397.399	285.549	265.253	78.6921	49.2668	250.589	251.572	43.0505	37.1035	65.5801	2.58869	0.191755
2020-10-30 RUES2-GLR p62 Day3 DE	D	5	DEControl	1400	1222	725.96	657.63	395.371	443.925	301.971	286.632	73.7696	56.1564	257.343	261.413	35.837	32.5001	59.9018	2.12766	0.163666
2020-10-30 RUES2-GLR p62 Day3 DE	D	6	DEControl	1400	939	774.711	692.624	454.932	485.844	298.095	281.534	77.7774	55.6257	256.145	259.1	40.197	33.9308	61.5548	2.55591	0.319489
2020-10-30 RUES2-GLR p62 Day3 DE	D	7	DEControl	1400	745	663.231	558.227	360.97	363.081	270.957	259.542	57.7406	42.776	244.737	247.765	34.7441	29.4563	53.557	0.402685	0.134228
2020-10-30 RUES2-GLR p62 Day3 DE	D	8	DMSOControl	1400	1209	729.802	609.578	438.659	422.99	300.051	282.288	78.6981	56.7317	260.291	262.916	38.2234	27.8462	57.3201	2.39868	0.165426
2020-10-30 RUES2-GLR p62 Day3 DE	D	9	DMSOControl	1400	1099	807.698	730.679	448.262	522.455	294.305	277.978	72.9809	44.8057	262.999	265.55	41.7008	31.701	64.9681	1.54686	0.454959
2020-10-30 RUES2-GLR p62 Day3 DE	D	10	DMSOControl	1400	614	596.152	455.103	324.258	238.476	296.767	278.873	78.5043	55.4774	266.088	263.01	52.6824	37.515	46.2541	1.62866	0.488599
2020-10-30 RUES2-GLR p62 Day3 DE	D	11	DMSOControl	1400	882	610.908	489.214	331.8	274.649	305.078	277.596	103.062	50.2727	270.005	272.021	36.5875	29.7765	48.8662	4.64853	0.226757
2020-10-30 RUES2-GLR p62 Day3 DE	D	12	DMSOControl	1400	798	585.299	508.402	289.003	287.273	277.255	261.913	74.9073	44.8412	245.251	246.865	35.0849	35.4972	50.3759	1.8797	0
2020-10-30 RUES2-GLR p62 Day3 DE	D	13	SB431542	1400	589	350.181	345.664	57.2766	60.9067	281.236	266.084	75.6143	47.5292	366.456	360.358	78.4669	73.2479	0.509338	1.86757	3.73514
2020-10-30 RUES2-GLR p62 Day3 DE	D	14	SB431542	1400	717	353.141	349.175	68.7312	51.1023	399.349	274.162	265.114	60.6606	336.675	334.036	69.0204	45.0844	0.55788	22.4547	1.95258
2020-10-30 RUES2-GLR p62 Day3 DE	D	15	SB431542	1400	678	339.396	340.416	53.8364	49.8769	295.654	269.667	119.339	38.0235	349.128	343.89	73.0905	60.5909	0.147493	4.86726	2.0649
2020-10-30 RUES2-GLR p62 Day3 DE	D	16	SB431542	1400	325	329.143	326.196	59.5214	54.2187	275.491	254.413	75.0693	43.4847	336.403	327.829	86.4462	56.8295	1.84615	2.76923	3.38461
2020-10-30 RUES2-GLR p62 Day3 DE	D	17	SB431542	1400	3	4871.9	4393.36	1811.91	1550.9	14969.4	15392.4	4330.32	5456.41	6709.89	6096.84	2441.09	2169.16	99.9967	99.9967	99.9967
2020-10-30 RUES2-GLR p62 Day3 DE	E	3	DEControl	1400	1087	716.539	676.201	356.554	416.415	272.721	257.688	66.6295	44.9435	242.311	244.004	36.9336	34.082	64.6734	1.19595	0.183993
2020-10-30 RUES2-GLR p62 Day3 DE	E	4	DEControl	1400	765	642.901	596.438	325.137	366.803	269.497	254.179	68.9779	43.0028	239.999	240.493	34.8692	34.9404	56.0784	1.43791	0.130719
2020-10-30 RUES2-GLR p62 Day3 DE	E	5	DEControl	1400	1249	866.432	807.322	516.399	588.708	284.837	272.895	65.3065	48.2735	248.124	250.112	37.0903	37.2296	67.0937	1.04083	0.160128
2020-10-30 RUES2-GLR p62 Day3 DE	E	6	DEControl	1400	1136	777.814	732.887	408.644	494.601	295.142	283.406	62.8758	46.9495	284.211	259.376	279.818	33.1591	66.6373	1.05634	2.64084
2020-10-30 RUES2-GLR p62 Day3 DE	E	7	DEControl	1400	662	709.614	603.558	412.447	423.823	269.171	255.278	64.9001	40.8167	244.156	242.82	47.5991	31.7521	56.6465	1.20846	0.453172
2020-10-30 RUES2-GLR p62 Day3 DE	E	8	DMSOControl	1400	1060	702.484	623.029	380.03	409.172	288.189	274.976	61.4467	43.4461	258.917	262.096	36.8635	28.1835	59.1509	1.60377	0.188679
2020-10-30 RUES2-GLR p62 Day3 DE	E	9	DMSOControl	1400	1136	724.426	617.109	420.575	405.341	292.272	275.113	73.2475	49.7694	261.582	261.714	42.4035	36.2044	57.9225	2.2007	0.352113
2020-10-30 RUES2-GLR p62 Day3 DE	E	10	DMSOControl	1400	787	629.583	482.981	351.031	270.075	301.05	284.448	76.2352	54.8859	259.712	262.136	36.3228	33.7973	48.6658	2.5413	0
2020-10-30 RUES2-GLR p62 Day3 DE	E	11	DMSOControl	1400	430	642.253	552.954	319.138	316.921	275.112	268.401	60.276	49.7449	254.241	257.403	36.8646	34.7929	53.7209	0.930232	0
2020-10-30 RUES2-GLR p62 Day3 DE	E	12	DMSOControl	1400	844	595.785	501.791	303.039	259.714	282.822	270.003	66.1748	45.1778	258.241	261.929	44.5545	35.0427	50.4739	1.18483	0.35545
2020-10-30 RUES2-GLR p62 Day3 DE	E	13	SB431542	1400	344	338.985	336.878	62.2079	60.8377	279.588	265.548	76.8289	41.6462	341.035	328.065	93.1039	77.0996	0.581395	1.45349	3.48837
2020-10-30 RUES2-GLR p62 Day3 DE	E	14	SB431542	1400	619	334.184	333.176	47.4189	43.1615	295.655	271.83	90.031	34.6068	348.119	339.374	79.771	55.6553	0.646203	5.49273	2.58481
2020-10-30 RUES2-GLR p62 Day3 DE	E	15	SB431542	1400	407	309.062	308.083	42.2187	42.5536	247.028	240.012	53.3919	30.4096	312.164	304.755	68.3161	52.7405	0	1.2285	1.4742
2020-10-30 RUES2-GLR p62 Day3 DE	E	16	SB431542	1400	427	320.686	318.527	48.5779	43.3483	290.976	258.402	102.577	45.3557	336.54	326.38	85.8958	59.8659	0.702576	7.49414	2.57611
2020-10-30 RUES2-GLR p62 Day3 DE	F	3	DEControl	2100	2114	1058.61	1039.75	566.724	669.34	296.775	278.959	82.5872	49.7271	254.444	259.384	31.0559	31.331	76.7739	2.88552	0
2020-10-30 RUES2-GLR p62 Day3 DE	F	4	DEControl	2100	1839	1025.15	1006.34	548.663	592.158	289.79	272.625	76.4558	47.3528	251.666	254.362	32.955	34.5342	76.8352	2.1751	0
2020-10-30 RUES2-GLR p62 Day3 DE	F	5	DEControl	2100	1593	868.274	841.455	488.686	592.414	301.725	277.537	99.0773	61.4123	250.818	249.999	39.4198	37.916	67.3572	4.58255	0.188324
2020-10-30 RUES2-GLR p62 Day3 DE	F	6	DEControl	2100	1547	775.847	669.19	461.494	493.04	289.983	273.45	73.6806	47.8969	250.082	252.627	39.5341	31.7543	60.5042	1.74531	0.323206
2020-10-30 RUES2-GLR p62 Day3 DE	F	7	DEControl	2100	1792	880.766	833.029	525.091	669.599	287.978	268.715	73.2174	49.9829	249.79	252.107	34.06	30.6053	65.6808	2.28795	0.167411
2020-10-30 RUES2-GLR p62 Day3 DE	F	8	DMSOControl	2100	1732	674.552	598.868	361.885	379.484	305.508	278.242	132.922	47.8924	255.256	258.425	33.422	30.9782	58.0831	3.75289	0.0577367
2020-10-30 RUES2-GLR p62 Day3 DE	F	9	DMSOControl	2100	1791	1033.4	957.912	652.438	720.363	300.235	283.642	78.7994	52.0645	265.147	267.022	38.0126	37.2385	71.7476	2.01005	0.111669
2020-10-30 RUES2-GLR p62 Day3 DE	F	10	DMSOControl	2100	1872	807.301	758.712	449.483	542.512	291.151	273.335	74.0753	46.8516	258.118	261.469	36.9208	32.8181	65.2244	2.13675	0.160256
2020-10-30 RUES2-GLR p62 Day3 DE	F	11	DMSOControl	2100	1734	807.108	682.638	497.871	493.66	285.919	274.027	61.5722	46.1481	261.162	264.805	37.5037	33.2525	60.8997	0.922722	0.17301
2020-10-30 RUES2-GLR p62 Day3 DE	F	12	DMSOControl	2100	1458	630.4	624.004	337.446	342.111	291.739	277.536	154.497	47.1756	262.997	259.969	143.083	32.6076	60.0137	1.02881	0.205761
2020-10-30 RUES2-GLR p62 Day3 DE	F	13	SB431542	2100	1156	335.687	333.168	52.5055	50.9088	287.25	264.468	85.0457	49.6567	331.944	325.332	69.6391	55.2973	0.692041	4.41176	2.07612
2020-10-30 RUES2-GLR p62 Day3 DE	F	14	SB431542	2100	1157	345.72	345.713	49.2206	49.3869	288.327	271.584	86.7473	39.0265	355.335	353.749	62.5039	54.6145	0.172861	3.37079	1.03716
2020-10-30 RUES2-GLR p62 Day3 DE	F	15	SB431542	2100	708	337.595	337.274	54.9995	55.53	299.85	271.643	102.132	47.4054	358.691	354.735	88.689	86.102	0.564972	5.22599	2.40113
2020-10-30 RUES2-GLR p62 Day3 DE	F	16	SB431542	2100	743	332.976	330.866	54.5985	50.9466	282.243	265.139	86.6843	38.9894	362.125	356.079	93.5146	68.3775	0.942126	3.09556	3.36474
2020-10-30 RUES2-GLR p62 Day3 DE	F	17	SB431542	2100	1	14205.1	14205.1		0	8924.7	8924.7		0	7440.16	7440.16		0	99.99	99.99	99.99
2020-10-30 RUES2-GLR p62 Day3 DE	G	3	DEControl	2100	2365	1031.6	1006.02	547.331	608.845	304.129	283.804	84.1544	52.0941	257.598	260.57	38.5309	34.3993	77.167	3.5518	0.169133
2020-10-30 RUES2-GLR p62 Day3 DE	G	4	DEControl	2100	1362	844.314	791.577	470.063	570.938	301.409	282.897	76.7204	54.5463	252.183	252.2	40.3951	34.7514	68.3554	2.86344	0.367107
2020-10-30 RUES2-GLR p62 Day3 DE	G	5	DEControl	2100	1819	941.163	889.032	538.551	636.47	301.897	283.538	80.7965	54.8206	248.208	249.888	32.54	33.1465	70.6982	2.91369	0
2020-10-30 RUES2-GLR p62 Day3 DE	G	6	DEControl	2100	1565	882.417	844.462	471.474	542.958	303.045	284.218	84.6908	46.3728	412.643	257.995	2820.6	34.4111	72.0767	3.45048	1.02236
2020-10-30 RUES2-GLR p62 Day3 DE	G	7	DEControl	2100	1616	889.078	863.63	492.696	606.917	300.209	284.402	74.53	51.9792	256.956	256.909	44.712	35.9375	69.7401	2.16584	0.680693
2020-10-30 RUES2-GLR p62 Day3 DE	G	8	DMSOControl	2100	2151	789.212	705.736	467.367	507.224	303.186	279.872	101.812	48.9317	261.275	263.226	37.5146	31.7202	60.6695	3.95165	0.18596
2020-10-30 RUES2-GLR p62 Day3 DE	G	9	DMSOControl	2100	1634	886.875	798.903	549.793	595.242	282.143	271.274	59.7138	42.9116	255.334	256.259	39.1048	35.1183	68.2374	0.979192	0.183599
2020-10-30 RUES2-GLR p62 Day3 DE	G	10	DMSOControl	2100	1859	800.415	759.284	529.362	534.172	302.168	282.104	243.259	48.9125	259.498	257.4	188.469	36.131	64.8736	2.04411	0.215169
2020-10-30 RUES2-GLR p62 Day3 DE	G	11	DMSOControl	2100	1824	853.211	786.407	513.379	566.868	303.447	277.197	98.1822	49.9873	260.924	264.726	35.6322	32.9219	66.5022	4.22149	0.0548246
2020-10-30 RUES2-GLR p62 Day3 DE	G	12	DMSOControl	2100	2112	730.942	674.908	373.353	412.022	304.457	281.781	107.342	51.504	266.953	268.722	45.1893	35.7981	64.3939	3.40909	0.331439
2020-10-30 RUES2-GLR p62 Day3 DE	G	13	SB431542	2100	1165	343.241	340.217	51.9821	44.859	313.991	269.348	140.062	50.4277	345.312	342.495	69.0201	51.6063	1.03004	9.35622	2.06009
2020-10-30 RUES2-GLR p62 Day3 DE	G	14	SB431542	2100	1172	340.991	341.771	45.5641	44.7478	274.069	267.697	59.0986	38.5469	356.359	358.714	70.9118	57.9556	0.341297	1.10921	1.10921
2020-10-30 RUES2-GLR p62 Day3 DE	G	15	SB431542	2100	996	336.954	327.441	172.255	52.6953	300.299	266.291	169.204	49.0785	353.038	339.245	176.534	65.6191	0.803213	5.82329	3.01205
2020-10-30 RUES2-GLR p62 Day3 DE	G	16	SB431542	2100	543	333.845	331.372	72.9967	40.1147	309.136	280.379	106.966	56.963	353.406	346.71	87.9577	63.823	0.552486	7.18232	2.94659
2020-10-30 RUES2-GLR p62 Day3 DE	H	3	DEControl	2100	1855	702.822	661.83	349.654	420.547	289.196	272.412	77.3447	50.9332	253.797	253.64	59.4899	31.6772	63.504	1.9407	0.485175
2020-10-30 RUES2-GLR p62 Day3 DE	H	4	DEControl	2100	1951	850.551	817.146	455.342	532.689	310.389	289.657	150.731	51.2505	262.383	259.717	153.486	35.0546	70.733	3.28037	0.512558
2020-10-30 RUES2-GLR p62 Day3 DE	H	5	DEControl	2100	1133	612.48	529.998	300.548	297.23	296.256	276.935	80.6972	53.0474	253.34	254.171	46.8673	33.3778	53.1333	3.79523	0.70609
2020-10-30 RUES2-GLR p62 Day3 DE	H	6	DEControl	2100	1791	943.717	889.712	567.338	705.319	290.442	272.316	77.1261	51.8035	255.112	253.962	65.1285	34.8174	67.7275	2.5684	0.446678
2020-10-30 RUES2-GLR p62 Day3 DE	H	7	DEControl	2100	1681	859.584	838.667	418.369	461.953	307.548	293.292	75.7384	55.851	259.384	262.809	37.365	37.6743	75.2528	2.79595	0.0594884
2020-10-30 RUES2-GLR p62 Day3 DE	H	8	DMSOControl	2100	1343	920.922	832.485	560.437	664.166	305.269	287.321	97.0632	53.2239	264.96	266.551	71.336	31.9945	67.1631	3.05287	0.22338
2020-10-30 RUES2-GLR p62 Day3 DE	H	9	DMSOControl	2100	1866	893.91	795.313	560.208	630.741	294.796	281.434	69.5938	48.0444	263.691	265.125	39.3086	35.9175	64.8446	1.60772	0.160772
2020-10-30 RUES2-GLR p62 Day3 DE	H	10	DMSOControl	2100	1824	877.338	792.472	548.834	595.729	299.848	275.964	86.4465	50.9429	260.004	262.19	40.112	29.8811	65.1864	3.50877	0.383772
2020-10-30 RUES2-GLR p62 Day3 DE	H	11	DMSOControl	2100	1222	763.556	707.773	410.642	481.811	280.423	270.795	64.7175	44.9487	258.392	259.12	46.8217	37.452	63.5024	1.47299	0.409165
2020-10-30 RUES2-GLR p62 Day3 DE	H	12	DMSOControl	2100	1469	722.036	680.572	346.044	401.472	296.136	280.749	73.8959	47.6181	260.488	262.966	36.7725	33.3244	64.6018	2.11028	0.0680735
2020-10-30 RUES2-GLR p62 Day3 DE	H	13	SB431542	2100	672	343.253	338.271	58.085	57.1172	289.476	265.878	98.642	45.8672	349.087	339.07	83.1779	66.1403	0.892857	4.16667	3.42262
2020-10-30 RUES2-GLR p62 Day3 DE	H	14	SB431542	2100	814	336.686	336.084	49.8744	51.2817	290.47	261.697	106.745	42.008	342.241	339.861	68.7504	58.0023	0.12285	5.03685	1.9656
2020-10-30 RUES2-GLR p62 Day3 DE	H	15	SB431542	2100	1199	339.621	338.774	50.9193	49.289	281.885	265.978	82.5084	41.9576	346.78	341.024	70.9428	57.2328	0.834028	3.25271	1.75146
2020-10-30 RUES2-GLR p62 Day3 DE	H	16	SB431542	2100	1221	324.902	326.73	42.4886	43.8523	264.505	254.76	60.4792	37.4683	335.515	334.92	57.4616	53	0.0819001	1.3923	0.900901
2020-10-30 RUES2-GLR p62 Day3 DE	I	3	DEControl	2800	2713	981.598	939.677	516.025	590.069	305.077	285.801	86.0984	50.0956	261.256	263.564	40.0915	36.7818	76.1519	3.42794	0.147438
2020-10-30 RUES2-GLR p62 Day3 DE	I	4	DEControl	2800	2258	860.014	826.559	448.372	496.211	291.099	274.365	69.2283	49.4225	254.352	256.334	34.5142	33.2844	72.6749	1.99291	0.088574
2020-10-30 RUES2-GLR p62 Day3 DE	I	5	DEControl	2800	2387	890.114	908.482	483.34	596.239	302.647	280.054	85.3909	51.7872	247.252	249.604	32.4168	30.4482	69.0406	3.77042	0.0837872
2020-10-30 RUES2-GLR p62 Day3 DE	I	6	DEControl	2800	2434	893.947	847.699	511.074	574.424	307.195	286.705	156.832	53.8302	260.726	261.88	112.43	34.4282	71.2818	2.62942	0.0410846
2020-10-30 RUES2-GLR p62 Day3 DE	I	7	DEControl	2800	2600	1064.21	1015.32	612.954	715.853	313.969	291.443	95.4817	55.364	263.633	266.007	40.282	36.8478	74.8077	4.92308	0.307692
2020-10-30 RUES2-GLR p62 Day3 DE	I	8	DMSOControl	2800	2131	853.906	787.148	499.922	585.511	304.106	287.769	71.334	47.9206	262.876	266.094	36.4038	31.5497	65.9315	2.29939	0.281558
2020-10-30 RUES2-GLR p62 Day3 DE	I	9	DMSOControl	2800	2528	952.47	896.142	584.653	681.055	311.604	291.255	89.9326	54.9259	265.651	267.931	41.2754	34.4149	68.9478	3.9557	0.356013
2020-10-30 RUES2-GLR p62 Day3 DE	I	10	DMSOControl	2800	2298	908.562	868.582	515.851	641.763	309.064	287.323	88.021	50.7753	261.857	264.816	37.7652	33.0998	68.7554	4.35161	0.261097
2020-10-30 RUES2-GLR p62 Day3 DE	I	11	DMSOControl	2800	2406	916.288	774.261	595.733	598.211	342.326	285.106	202.522	54.2595	261.61	264.469	41.2272	33.0657	63.6326	8.68662	0.166251
2020-10-30 RUES2-GLR p62 Day3 DE	I	12	DMSOControl	2800	2489	931.463	879.298	514.068	637.558	303.669	288.196	89.9626	46.3594	268.669	270.055	42.5456	35.2488	70.9924	1.96866	0.321414
2020-10-30 RUES2-GLR p62 Day3 DE	I	13	SB431542	2800	1854	349.17	350.907	53.7611	53.6316	300.525	282.724	115.098	51.6842	372.051	368.065	77.3858	67.081	0.431499	2.75081	4.58468
2020-10-30 RUES2-GLR p62 Day3 DE	I	14	SB431542	2800	1217	352.953	341.932	408.733	48.4973	295.652	270.866	343.973	35.6847	370.735	362.884	323.8	58.2602	0.493016	3.77979	1.56122
2020-10-30 RUES2-GLR p62 Day3 DE	I	15	SB431542	2800	1709	340.001	335.221	53.0238	51.7116	342.688	275.489	192.969	54.1698	352.194	347.351	77.4622	60.1328	0.760679	11.8198	2.04798
2020-10-30 RUES2-GLR p62 Day3 DE	I	16	SB431542	2800	1590	330.683	332.164	45.2568	43.1266	323.663	268.94	162.507	40.025	352.85	350.731	69.5112	56.7057	0.440252	12.2013	1.44654
2020-10-30 RUES2-GLR p62 Day3 DE	J	3	DEControl	2800	2347	984.323	961.046	486.886	539.027	305.426	291.153	70.0707	48.0926	263.728	265.8	38.3397	36.1917	78.9519	2.42863	0.127823
2020-10-30 RUES2-GLR p62 Day3 DE	J	4	DEControl	2800	1941	907.641	866.188	513.604	588.518	288.651	274.435	66.7818	47.1348	247.707	247.245	35.2717	33.6862	70.7882	1.75167	0.10304
2020-10-30 RUES2-GLR p62 Day3 DE	J	5	DEControl	2800	2427	1104.24	997.752	707.044	790.798	304.607	288.698	76.4695	53.7131	259.163	261.666	34.6698	35.8255	72.7235	2.47219	0.0412031
2020-10-30 RUES2-GLR p62 Day3 DE	J	6	DEControl	2800	2145	920.472	853.509	543.585	633.11	301.791	282.792	82.8473	51.0963	255.336	258.311	33.5426	33.3066	69.5571	3.40326	0
2020-10-30 RUES2-GLR p62 Day3 DE	J	7	DEControl	2800	2441	1123.5	1066.47	678.171	776.141	309.64	285.308	93.1286	60.9378	258.953	261.685	34.8044	34.4349	74.5596	4.46538	0.0819336
2020-10-30 RUES2-GLR p62 Day3 DE	J	8	DMSOControl	2800	2000	929.02	877.354	544.999	651.143	302.264	285.25	141.922	44.5855	266.966	266.332	129.375	34.3467	69.75	2.35	0.35
2020-10-30 RUES2-GLR p62 Day3 DE	J	9	DMSOControl	2800	2521	895.748	837.705	504.771	618.518	322.604	303.156	89.7257	57.5619	271.576	274.914	38.6026	36.6425	68.5839	4.32368	0.158667
2020-10-30 RUES2-GLR p62 Day3 DE	J	10	DMSOControl	2800	2180	821.974	734.468	480.293	525.086	309.782	287.507	89.6021	54.2646	265.065	267.172	40.1027	37.7448	64.4495	4.90826	0.183486
2020-10-30 RUES2-GLR p62 Day3 DE	J	11	DMSOControl	2800	2718	895.229	857.924	471.187	569.123	311.113	296.416	75.6936	49.4736	267.06	269.997	40.5819	35.3556	71.8543	3.09051	0.294334
2020-10-30 RUES2-GLR p62 Day3 DE	J	12	DMSOControl	2800	2723	1043.58	1024.76	600.915	740.751	301.481	284.987	75.9293	49.166	263.973	266.482	36.6376	33.4178	72.4568	2.4238	0.110173
2020-10-30 RUES2-GLR p62 Day3 DE	J	13	SB431542	2800	1247	344.558	343.419	51.9398	48.1548	280.522	267.952	68.0286	35.3689	357.529	352.339	74.9982	58.9245	0.962309	2.24539	2.48597
2020-10-30 RUES2-GLR p62 Day3 DE	J	14	SB431542	2800	1571	339.585	339.212	50.5561	51.9503	280.622	271.524	65.7467	38.6884	362.65	358.469	76.922	69.1514	0.381922	2.10057	2.16423
2020-10-30 RUES2-GLR p62 Day3 DE	J	15	SB431542	2800	1685	339.649	337.964	51.1587	53.7932	284.948	273.477	82.6559	38.7062	373.324	369.348	78.9112	69.313	0.41543	2.43323	3.32344
2020-10-30 RUES2-GLR p62 Day3 DE	J	16	SB431542	2800	1470	328.188	326.952	46.9472	44.5973	302.282	268.99	121.731	43.4194	369.613	349.892	91.251	69.7904	0.272109	7.21088	11.0204
2020-10-30 RUES2-GLR p62 Day3 DE	K	3	DEControl	2800	2563	1058.57	995.173	605.291	706.426	311.853	288.804	90.2113	58.7673	256.007	258.378	36.462	32.4497	75.4584	4.13578	0.156067
2020-10-30 RUES2-GLR p62 Day3 DE	K	4	DEControl	2800	2503	852.545	837.537	438.243	506.938	300.04	284.604	68.529	48.1356	251.72	253.829	35.9655	31.0812	71.5941	2.11746	0.19976
2020-10-30 RUES2-GLR p62 Day3 DE	K	5	DEControl	2800	2523	932.822	916.974	460.911	516.511	308.223	288.966	95.3061	48.2972	260.301	261.514	37.3146	34.2836	76.5755	3.28973	0.198177
2020-10-30 RUES2-GLR p62 Day3 DE	K	6	DEControl	2800	2034	1005.91	937.602	601.922	724.108	296.708	279.127	73.7581	51.4981	253.965	255.833	38.9546	33.4089	71.4356	2.0649	0.147493
2020-10-30 RUES2-GLR p62 Day3 DE	K	7	DEControl	2800	2961	926.968	895.748	467.017	534.436	317.597	301.733	74.3133	47.7723	272.229	275.204	37.0478	35.3541	75.4475	2.5667	0.135089
2020-10-30 RUES2-GLR p62 Day3 DE	K	8	DMSOControl	2800	2085	981.14	889.647	585.914	671.771	310.211	294.996	75.2583	52.7776	265.59	268.793	36.4509	34.1013	71.4149	2.494	0.143885
2020-10-30 RUES2-GLR p62 Day3 DE	K	9	DMSOControl	2800	2011	1105.93	1044.46	691.494	813.621	298.772	281.432	76.6981	45.6834	263.368	266.307	36.8249	32.3874	72.2526	2.73496	0.099453
2020-10-30 RUES2-GLR p62 Day3 DE	K	10	DMSOControl	2800	2953	1059.87	1015.96	588.492	668	307.492	288.068	86.0696	48.6322	260.205	263.355	34.8239	33.7232	76.4985	3.58957	0.0677277
2020-10-30 RUES2-GLR p62 Day3 DE	K	11	DMSOControl	2800	2479	1053.27	931.14	671.877	769.818	292.745	275.753	75.5785	44.9361	263.884	265.659	41.7308	33.6194	69.1811	2.58169	0.322711
2020-10-30 RUES2-GLR p62 Day3 DE	K	12	DMSOControl	2800	2388	1052.85	999.978	609.224	748.121	311.472	293.095	80.7755	52.4218	268.268	272.63	35.8823	35.9545	73.0318	3.68509	0
2020-10-30 RUES2-GLR p62 Day3 DE	K	13	SB431542	2800	1461	345.806	348.434	49.4998	49.8984	288.76	275.923	79.6107	33.5972	372.806	376.823	71.5195	62.711	0.479124	3.14853	2.19028
2020-10-30 RUES2-GLR p62 Day3 DE	K	14	SB431542	2800	1373	344.33	343.624	54.2161	50.8131	304.997	276.208	113.229	42.5951	372.135	364.244	88.1812	59.7888	0.655499	6.91915	4.22433
2020-10-30 RUES2-GLR p62 Day3 DE	K	15	SB431542	2800	1465	346.975	347.424	51.3225	49.7991	286.091	275.348	73.4365	36.9316	372.743	369.032	88.2742	63.4034	0.682594	2.66212	3.27645
2020-10-30 RUES2-GLR p62 Day3 DE	K	16	SB431542	2800	1422	326.205	327.579	45.0645	40.5024	281.005	269.889	77.0326	35.1013	362.606	359.308	73.762	59.7807	0.281294	2.95359	1.75809
2020-10-30 RUES2-GLR p62 Day3 DE	L	3	DEControl	3500	3065	969.815	935.144	536.671	605.488	311.164	285.662	95.3827	54.0986	258.096	261.817	34.1387	31.2532	73.9641	4.37194	0.0978793
2020-10-30 RUES2-GLR p62 Day3 DE	L	4	DEControl	3500	3568	961.165	937.812	483.501	540.843	325.677	302.416	86.5917	53.0059	263.063	266.425	34.42	32.6179	76.4013	4.76457	0.168161
2020-10-30 RUES2-GLR p62 Day3 DE	L	5	DEControl	3500	3595	1001.54	976.573	525.437	597.335	317.507	296.546	84.4883	49.0133	265.786	269.004	34.6781	32.3785	76.5229	4.75661	0.139082
2020-10-30 RUES2-GLR p62 Day3 DE	L	6	DEControl	3500	3038	1035.2	1014.11	559.137	622.957	311.102	291.476	85.7337	49.5945	265.915	269.407	35.6288	34.0687	76.2673	4.08163	0.0658328
2020-10-30 RUES2-GLR p62 Day3 DE	L	7	DEControl	3500	2970	983.853	968.961	523.703	591.313	320.733	301.122	86.2185	53.6842	265.013	268.584	33.3225	33.0131	74.7811	4.0404	0.03367
2020-10-30 RUES2-GLR p62 Day3 DE	L	8	DMSOControl	3500	3141	992.944	939.3	589.837	706.927	335.934	302.575	118.227	57.3707	271.683	275.932	36.9743	35.0101	70.6145	7.76823	0.159185
2020-10-30 RUES2-GLR p62 Day3 DE	L	9	DMSOControl	3500	3636	1249.99	1181.09	710.427	754.118	316.875	300.563	77.8821	46.8969	274.858	278.466	39.6576	33.7225	80.6656	3.52035	0.30253
2020-10-30 RUES2-GLR p62 Day3 DE	L	10	DMSOControl	3500	2897	937.659	878.077	527.409	585.972	308.234	291.163	82.7843	49.5174	258.861	261.425	36.7205	34.5461	72.5233	3.1757	0.138074
2020-10-30 RUES2-GLR p62 Day3 DE	L	11	DMSOControl	3500	3078	1130.83	1052.91	688.174	774.234	320.433	297.452	96.8944	49.4944	271.878	274.352	42.3344	37.5765	75.0487	5.16569	0.129955
2020-10-30 RUES2-GLR p62 Day3 DE	L	12	DMSOControl	3500	2779	963.688	937.849	506.824	611.771	305.36	293.742	75.2737	50.7672	269.638	271.647	39.4057	39.412	74.4153	1.97913	0.0359842
2020-10-30 RUES2-GLR p62 Day3 DE	L	13	SB431542	3500	2088	340.512	339.325	47.6559	47.868	282.186	269.731	75.8533	33.9753	366.79	363.615	69.5005	57.0393	0.622605	2.87356	2.44253
2020-10-30 RUES2-GLR p62 Day3 DE	L	14	SB431542	3500	2081	339.518	340.245	49.6934	50.229	288.363	272.364	85.1318	40.4275	367.059	364.676	73.9074	60.2988	0.720807	2.97934	2.97934
2020-10-30 RUES2-GLR p62 Day3 DE	L	15	SB431542	3500	1585	325.818	325.219	50.6109	44.7019	287.151	266.453	104.097	40.4705	340.188	335.574	80.9912	55.553	0.946372	5.48896	2.2082
2020-10-30 RUES2-GLR p62 Day3 DE	L	16	SB431542	3500	1686	337.036	337.863	48.5518	48.8272	328.861	280.064	156.897	42.3453	381.909	379.191	77.133	64.1187	0.355872	10.9134	2.90629
2020-10-30 RUES2-GLR p62 Day3 DE	L	17	SB431542	3500	172	437.259	416.108	134.492	81.8744	641.366	569.056	316.052	301.479	934.85	843.674	395	424.846	13.3721	59.8837	87.2093
2020-10-30 RUES2-GLR p62 Day3 DE	M	3	DEControl	3500	3492	873.206	858.366	406.581	441.346	336.049	319.128	79.015	58.2951	271.141	274.616	34.7929	32.9841	77.0332	4.2669	0.143184
2020-10-30 RUES2-GLR p62 Day3 DE	M	4	DEControl	3500	3222	900.491	851.956	469.802	526.072	321.828	301.74	87.6608	54.0015	265.039	266.473	42.2813	35.661	73.9913	4.31409	0.27933
2020-10-30 RUES2-GLR p62 Day3 DE	M	5	DEControl	3500	3669	1023.33	994.096	526.848	566.241	331.964	307.955	99.0721	59.2729	269.555	272.176	40.0715	37.1984	78.332	5.77814	0.327065
2020-10-30 RUES2-GLR p62 Day3 DE	M	6	DEControl	3500	3535	1071.57	1060.63	544.78	616.33	326.639	303.24	95.1518	53.4907	265.756	269.006	36.4042	32.9893	78.5573	4.95049	0.141443
2020-10-30 RUES2-GLR p62 Day3 DE	M	7	DEControl	3500	3058	998.549	959.931	537.962	624.966	317.652	295	87.2593	52.7161	263.063	265.116	38.8068	32.8967	74.7874	4.08764	0.261609
2020-10-30 RUES2-GLR p62 Day3 DE	M	8	DMSOControl	3500	3128	1037.63	1007.95	542.224	582.024	318.82	300.676	83.7083	50.8636	270.772	274.068	38.7838	36.5239	78.3887	3.99616	0.159847
2020-10-30 RUES2-GLR p62 Day3 DE	M	9	DMSOControl	3500	3271	1062.04	1005.61	581.798	621.12	311.633	294.872	77.7131	45.5514	271.629	274.768	38.1292	35.87	78.447	2.8126	0.214002
2020-10-30 RUES2-GLR p62 Day3 DE	M	10	DMSOControl	3500	2897	893.942	862.704	472.474	575.625	339.953	316.954	94.7316	57.1987	273.124	276.221	41.5655	34.3963	71.3842	6.45495	0.276148
2020-10-30 RUES2-GLR p62 Day3 DE	M	11	DMSOControl	3500	2723	1099.72	1052.37	663.847	796.992	306.104	288.136	86.2693	49.5826	271.528	272.685	40.9212	36.6706	72.9343	3.4888	0.293794
2020-10-30 RUES2-GLR p62 Day3 DE	M	12	DMSOControl	3500	2882	842.129	768.647	466.124	546.346	317.486	300.616	82.1158	55.1171	270.911	273.169	35.9353	34.3682	68.2165	3.50451	0.104094
2020-10-30 RUES2-GLR p62 Day3 DE	M	13	SB431542	3500	1941	339.861	340.433	44.8451	45.5529	294.568	271.711	95.8635	41.2919	350.828	349.706	60.5388	52.8606	0.206079	4.53375	1.44256
2020-10-30 RUES2-GLR p62 Day3 DE	M	14	SB431542	3500	1916	342.173	341.999	50.4362	49.1697	283.033	269.252	79.4035	38.5721	372.349	368.087	74.2792	68.5547	0.574113	2.50522	2.92276
2020-10-30 RUES2-GLR p62 Day3 DE	M	15	SB431542	3500	1650	334.02	332.796	46.7802	42.2445	294.401	271.58	99.5855	37.6847	369.859	366.091	69.9832	58.178	0.30303	4.54545	2.84848
2020-10-30 RUES2-GLR p62 Day3 DE	M	16	SB431542	3500	2120	339.076	339.524	48.8104	50.7057	324.149	275.821	162.518	50.553	343.331	341	61.5738	61.9593	0.283019	9.66981	0.896226
2020-10-30 RUES2-GLR p62 Day3 DE	M	17	SB431542	3500	2005	334.558	336.762	43.1482	44.263	283.447	271.621	72.4279	37.3615	368.107	367.399	64.2385	56.4722	0.149626	2.14464	1.84539
2020-10-30 RUES2-GLR p62 Day3 DE	N	3	DEControl	3500	3586	936.426	917.736	435.925	455.275	332.854	309.45	93.0826	60.9653	259.434	262.203	35.3776	34.7596	79.894	5.68879	0.111545
2020-10-30 RUES2-GLR p62 Day3 DE	N	4	DEControl	3500	3309	1060.63	1039.56	529.487	553.982	316.969	296.783	84.8667	55.2313	262.601	265.346	39.8903	33.8996	80.9912	3.68691	0.211544
2020-10-30 RUES2-GLR p62 Day3 DE	N	5	DEControl	3500	3714	867.629	854.736	372.788	392.946	321.35	306.534	78.2766	52.8124	267.099	269.436	38.2293	37.1488	80.1292	3.52719	0.188476
2020-10-30 RUES2-GLR p62 Day3 DE	N	6	DEControl	3500	3124	954.088	936.945	458.411	503.255	314.203	296.528	77.847	50.2883	262.053	264.852	35.8184	33.2681	78.7132	2.88092	0.0960307
2020-10-30 RUES2-GLR p62 Day3 DE	N	7	DEControl	3500	3225	1011.25	998.422	505.281	513.398	328.483	311.393	80.7215	54.0274	271.537	275.106	38.4415	36.6069	79.7829	3.68992	0.124031
2020-10-30 RUES2-GLR p62 Day3 DE	N	8	DMSOControl	3500	3348	955.893	937.662	467.081	524.482	332.707	314.77	90.9778	57.1802	276.65	279.156	43.9919	37.0153	77.4492	4.80884	0.507766
2020-10-30 RUES2-GLR p62 Day3 DE	N	9	DMSOControl	3500	3310	1074.7	1050.03	566.519	624.992	315.747	301.956	72.9455	51.0311	275.025	278.017	38.0514	34.0828	79.2447	2.44713	0.21148
2020-10-30 RUES2-GLR p62 Day3 DE	N	10	DMSOControl	3500	3204	1001.38	971.706	524.63	585.634	309.002	294.81	71.8981	53.3076	264.833	268.083	36.9761	34.913	76.5918	2.2784	0.093633
2020-10-30 RUES2-GLR p62 Day3 DE	N	11	DMSOControl	3500	3061	899.001	859.787	470.138	522.725	319.709	305.467	77.5976	51.7724	274.248	275.844	44.4652	37.2488	73.5381	2.90755	0.490036
2020-10-30 RUES2-GLR p62 Day3 DE	N	12	DMSOControl	3500	3077	1030.57	986.82	580.083	686.319	328.223	307.589	91.8937	58.3744	274.413	276.84	39.0807	35.1006	74.3581	4.90738	0.227494
2020-10-30 RUES2-GLR p62 Day3 DE	N	13	SB431542	3500	2055	344.877	342.286	51.477	48.5907	286.842	268.694	95.5454	39.3467	373.58	366.816	79.4813	63.2136	0.437956	3.11436	5.06083
2020-10-30 RUES2-GLR p62 Day3 DE	N	14	SB431542	3500	2396	344.692	343.093	53.3449	54.1016	295.069	272.596	99.4475	42.6455	364.483	363.051	73.9773	62.0327	0.500835	5.59265	4.25709
2020-10-30 RUES2-GLR p62 Day3 DE	N	15	SB431542	3500	2247	333.178	333.544	47.4121	46.3668	278.936	267.691	79.7276	37.2904	374.687	370.996	75.5875	60.1283	0.400534	2.58122	3.5603
2020-10-30 RUES2-GLR p62 Day3 DE	N	16	SB431542	3500	2311	335.999	329.883	297.786	47.2786	292.144	267.091	254.787	39.2533	351.601	345.995	213.735	54.0734	0.34617	4.02423	1.5145
2020-10-30 RUES2-GLR p62 Day3 DE	N	17	SB431542	3500	2192	341.221	338.188	53.5328	51.8539	375.917	289.975	223.507	57.092	395.665	395.017	77.9891	69.5332	0.456204	17.7007	6.11314
RUES2-GLR p59 DE Day3 2020-10-19	C	18	PluriControl	1400	863	393.882	353.97	171.256	63.3811	995.459	1029.19	409.671	408.785	327.332	272.714	211.08	36.5876	11.124	84.5886	11.4716
RUES2-GLR p59 DE Day3 2020-10-19	C	19	PluriControl	1400	1166	347.075	330.075	94.9585	38.277	986.703	1000.57	392.159	389.888	271.519	256.396	113.07	28.1264	2.65866	87.5643	3.00172
RUES2-GLR p59 DE Day3 2020-10-19	C	20	PluriControl	1400	1253	349.348	340.086	91.6289	42.8234	953.389	955.826	373.884	388.818	273.553	262.559	114.264	36.5075	2.7933	86.9114	3.03272
RUES2-GLR p59 DE Day3 2020-10-19	C	21	PluriControl	1400	1223	374.363	349.659	135.859	43.6759	997.325	1019.32	388.768	387.592	303.752	268.174	174.109	27.5704	6.78659	87.6533	6.62306
RUES2-GLR p59 DE Day3 2020-10-19	C	22	PluriControl	1400	1358	368.461	338.363	125.37	48.1749	963.194	972.778	362.506	373.115	290.04	255.436	157.636	43.4676	6.84831	86.5979	7.06922
RUES2-GLR p59 DE Day3 2020-10-19	D	18	PluriControl	1400	881	372.7	349.565	121.678	43.5781	909.983	905.899	413.39	455.621	301.236	275.753	142.451	22.3665	5.33485	79.6822	5.44835
RUES2-GLR p59 DE Day3 2020-10-19	D	19	PluriControl	1400	1131	367.009	337.176	135.467	48.4929	937.684	946.762	378.963	400.859	295.703	260.711	173.619	37.9575	6.80813	85.1459	6.54288
RUES2-GLR p59 DE Day3 2020-10-19	D	20	PluriControl	1400	1130	380.581	346.55	150.144	46.69	982.134	994.942	389.983	405.426	305.342	263.734	180.69	32.8314	7.9646	86.3717	7.87611
RUES2-GLR p59 DE Day3 2020-10-19	D	21	PluriControl	1400	1238	366.178	337.529	129.816	51.4981	1006.37	1035.02	410.478	399.631	288.31	254.803	158.638	44.8049	7.10824	85.9451	6.78514
RUES2-GLR p59 DE Day3 2020-10-19	D	22	PluriControl	1400	735	359.969	346.008	101.144	42.1518	968.666	983.283	390.233	392.64	290.17	261.066	145.328	29.695	5.57823	85.5782	6.93877
RUES2-GLR p59 DE Day3 2020-10-19	E	18	PluriControl	1400	862	387.012	360.227	126.435	39.2214	976.74	981.671	406.849	452.569	374.721	278.365	1648.91	24.4459	8.12065	84.5708	8.23666
RUES2-GLR p59 DE Day3 2020-10-19	E	19	PluriControl	1400	1044	375.035	353.243	118.207	42.8686	998.401	1028.67	392.533	398.901	296.279	269.387	143.718	28.9841	6.03448	86.6858	5.65134
RUES2-GLR p59 DE Day3 2020-10-19	E	20	PluriControl	1400	859	380.881	357.075	136.757	45.206	985.876	995.6	421.806	440.525	307.459	259.799	183.058	27.6164	9.31315	83.3527	10.1281
RUES2-GLR p59 DE Day3 2020-10-19	E	21	PluriControl	1400	949	387.66	346.892	150.597	46.4024	884.377	879.176	395.129	454.467	319.882	268.851	186.104	28.116	10.2213	79.0306	9.79979
RUES2-GLR p59 DE Day3 2020-10-19	E	22	PluriControl	1400	1455	381.256	362.571	114.58	36.2036	1025.89	1036.57	402.06	419.637	298.175	272.583	138.824	23.2575	5.2921	87.5601	5.42955
RUES2-GLR p59 DE Day3 2020-10-19	F	18	PluriControl	2100	2567	366.669	353.857	145.766	52.2468	1023.31	1022.04	352.548	343.567	282.684	271.572	184.059	45.6448	3.31126	93.2217	3.03857
RUES2-GLR p59 DE Day3 2020-10-19	F	19	PluriControl	2100	1940	371.049	365.497	87.022	50.2601	995.801	984.362	372.118	362.646	288.995	285.493	97.5897	33.1102	2.37113	89.7423	2.1134
RUES2-GLR p59 DE Day3 2020-10-19	F	20	PluriControl	2100	2337	365.28	347.273	122.226	40.2645	1025.92	1046.93	347.413	348.596	289.072	267.902	145.513	36.0153	4.57852	91.442	4.36457
RUES2-GLR p59 DE Day3 2020-10-19	F	21	PluriControl	2100	2315	362.742	349.288	103.65	39.7707	986.557	1009.82	367.434	371.866	285.345	269.643	122.225	32.1102	4.06047	87.8186	4.01728
RUES2-GLR p59 DE Day3 2020-10-19	F	22	PluriControl	2100	2583	358.146	345.356	99.0827	48.1341	988.361	987.033	361.173	370.214	279.788	269.192	114.464	30.3636	3.63918	89.547	3.40689
RUES2-GLR p59 DE Day3 2020-10-19	G	18	PluriControl	2100	2169	366.091	363.32	64.9147	47.3809	1033.69	1046.39	369.502	380.079	280.086	280.733	69.1879	33.8744	1.0604	90.6869	0.783771
RUES2-GLR p59 DE Day3 2020-10-19	G	19	PluriControl	2100	1398	361.057	345.762	98.6365	44.031	966.06	985.396	357.853	365.68	284.078	267.594	115.068	29.8514	3.36195	88.5551	3.29041
RUES2-GLR p59 DE Day3 2020-10-19	G	20	PluriControl	2100	2159	359.768	353.32	77.9636	43.2534	1049.72	1063.19	369.818	362.718	276.675	271.937	88.119	36.1903	2.13062	92.0797	1.99166
RUES2-GLR p59 DE Day3 2020-10-19	G	21	PluriControl	2100	1806	360.531	352.022	100.525	38.4594	1013.34	1022.11	375.074	371.462	281.373	273.664	114.354	27.0196	2.71318	89.7564	2.76855
RUES2-GLR p59 DE Day3 2020-10-19	G	22	PluriControl	2100	2041	358.302	353.889	81.0235	38.6573	1046.99	1069.15	378.454	381.621	278.115	272.818	84.973	31.3748	2.10681	90.7398	1.81284
RUES2-GLR p59 DE Day3 2020-10-19	H	18	PluriControl	2100	2164	380.095	370.339	93.9695	53.7761	1093.93	1090.38	398.104	399.831	284.835	274.161	109.412	42.6551	3.51201	91.9593	3.09612
RUES2-GLR p59 DE Day3 2020-10-19	H	19	PluriControl	2100	2107	379.604	366.189	106.701	35.5127	1034.27	1044.33	376.163	388.041	298.156	280.305	127.473	27.7217	4.46132	90.8401	4.50878
RUES2-GLR p59 DE Day3 2020-10-19	H	20	PluriControl	2100	1469	371.656	344.625	129.374	52.4262	984.365	995.679	375.195	382.112	301.63	272.205	171.868	38.7181	6.53506	88.4956	6.46698
RUES2-GLR p59 DE Day3 2020-10-19	H	21	PluriControl	2100	1432	356.567	347.173	91.3376	46.524	1009.37	1014.34	353.588	366.299	274.008	264.366	104.866	34.3318	2.93296	91.7598	2.86313
RUES2-GLR p59 DE Day3 2020-10-19	H	22	PluriControl	2100	1893	366.516	356.536	109.944	50.6115	1060.9	1058.03	373.721	379.071	279.119	264.196	144.668	35.36	2.95827	92.6572	2.95827
RUES2-GLR p59 DE Day3 2020-10-19	I	18	PluriControl	2800	2716	378.825	372.301	88.3571	52.6582	1035.16	1035.73	344.938	348.712	292.934	286.043	103.155	37.6054	3.1296	93.1885	2.87187
RUES2-GLR p59 DE Day3 2020-10-19	I	19	PluriControl	2800	2690	365.737	357.942	81.9509	47.0666	993.1	994.947	336.174	339.484	282.283	276.428	89.156	33.1524	1.89591	91.5985	1.82156
RUES2-GLR p59 DE Day3 2020-10-19	I	20	PluriControl	2800	2010	351.166	346.089	75.374	44.6908	1019.16	1024.8	354.907	342.084	270.643	268.624	84.4489	32.5534	1.74129	91.99	1.64179
RUES2-GLR p59 DE Day3 2020-10-19	I	21	PluriControl	2800	2458	364.262	358.417	81.3665	46.4113	1065.01	1079.68	360.302	362.764	276.309	271.567	94.404	35.3682	1.95281	92.8804	2.03417
RUES2-GLR p59 DE Day3 2020-10-19	I	22	PluriControl	2800	2390	352.625	347.522	65.486	45.6596	968.008	962.052	344.548	338.098	273.149	270.409	70.2106	34.4808	1.12971	90.1255	1.08787
RUES2-GLR p59 DE Day3 2020-10-19	J	18	PluriControl	2800	2328	363.69	356.615	85.14	50.9251	1027.89	1041.92	361.14	364.809	278.125	272.086	95.7817	38.2615	2.36254	90.8935	2.19072
RUES2-GLR p59 DE Day3 2020-10-19	J	19	PluriControl	2800	2671	376.068	369.814	84.9335	56.6976	1046.66	1044.93	359.729	345.98	290.57	287.747	90.3306	41.3897	2.20891	93.2609	1.79708
RUES2-GLR p59 DE Day3 2020-10-19	J	20	PluriControl	2800	2052	362.822	350.174	91.7724	52.2201	977.876	982.795	356	352.785	290.698	276.245	113.127	39.4957	3.7037	89.5711	3.8499
RUES2-GLR p59 DE Day3 2020-10-19	J	21	PluriControl	2800	2114	365.942	358.438	93.1632	45.1815	967.539	966.158	330.529	336.108	289.542	282.63	103.346	29.0775	2.93283	91.2015	2.79092
RUES2-GLR p59 DE Day3 2020-10-19	J	22	PluriControl	2800	2252	365.786	354.31	101.471	38.2578	1014.27	1024.59	356.26	367.803	288.45	275.675	114.625	31.7617	3.06394	91.5186	3.15275
RUES2-GLR p59 DE Day3 2020-10-19	K	18	PluriControl	2800	2450	368.041	366.832	71.337	41.9435	1103.38	1121.96	375.209	378.549	282.268	279.514	79.4952	29.8677	1.83673	92.6939	1.83673
RUES2-GLR p59 DE Day3 2020-10-19	K	19	PluriControl	2800	2518	371.316	365.564	85.1956	53.5048	1029.27	1039.19	356.595	359.307	285.717	280.218	94.0655	37.5031	2.22399	91.5806	2.10485
RUES2-GLR p59 DE Day3 2020-10-19	K	20	PluriControl	2800	2963	367.721	357.901	95.8847	40.4112	1091.88	1101.13	352.639	353.164	286.439	274.607	108.776	34.3311	2.90246	94.2626	2.69997
RUES2-GLR p59 DE Day3 2020-10-19	K	21	PluriControl	2800	2124	366.055	356.881	92.0818	42.0258	1012.37	1015.73	360.235	355.139	281.358	272.481	103.87	32.1591	2.58945	90.7721	2.30697
RUES2-GLR p59 DE Day3 2020-10-19	K	22	PluriControl	2800	2209	370.172	358.196	107.733	50.3461	1018.49	1023.31	353.579	357.277	285.51	270.549	123.568	38.5091	3.80263	92.0326	3.84789
RUES2-GLR p59 DE Day3 2020-10-19	L	18	PluriControl	3500	4004	391.768	380.916	125.067	56.3225	1205.91	1201.35	392.602	369.838	295.979	289.229	138.761	39.8553	5.36963	96.5035	1.1988
RUES2-GLR p59 DE Day3 2020-10-19	L	19	PluriControl	3500	3265	404.058	393.941	93.8644	71.4984	1195.04	1196.26	409.773	429.075	304.131	298.139	94.0779	46.9688	8.36141	95.6508	2.29709
RUES2-GLR p59 DE Day3 2020-10-19	L	20	PluriControl	3500	2885	375.133	367.549	103.68	48.9614	1051.27	1048.44	344.34	352.577	296.41	286.851	119.925	32.8781	3.15425	94.2808	3.18891
RUES2-GLR p59 DE Day3 2020-10-19	L	21	PluriControl	3500	3614	377.693	370.58	85.0287	48.9436	1120.73	1118.32	366.999	367.174	285.137	280.6	86.5649	34.3318	1.99225	95.3514	1.63254
RUES2-GLR p59 DE Day3 2020-10-19	L	22	PluriControl	3500	3477	355.984	349.586	72.6897	47.6063	1001.27	1004.14	325.391	314.216	274.24	272.269	82.9059	36.2822	1.6681	92.8674	1.55306
RUES2-GLR p59 DE Day3 2020-10-19	M	18	PluriControl	3500	2874	360.464	358.129	66.1837	40.8671	1048.06	1057.8	345.767	355.665	274.521	274.358	72.7167	33.7922	1.07864	93.9457	1.04384
RUES2-GLR p59 DE Day3 2020-10-19	M	19	PluriControl	3500	3000	355.774	354.235	72.3371	46.2986	992.03	992.736	318.329	323.725	277.233	274.681	79.2962	37.2207	1.53333	93.7667	1.43333
RUES2-GLR p59 DE Day3 2020-10-19	M	20	PluriControl	3500	3723	375.484	369.077	75.1701	53.4522	1154.44	1138.23	390.029	378.3	288.691	287.64	77.8764	34.4393	3.11577	95.783	1.6116
RUES2-GLR p59 DE Day3 2020-10-19	M	21	PluriControl	3500	3736	368.369	364.603	69.0609	50.2698	1055.46	1068.98	319.22	309.714	282.011	282.272	77.2101	42.4676	1.4454	94.9411	1.25803
RUES2-GLR p59 DE Day3 2020-10-19	M	22	PluriControl	3500	3292	375.972	360.704	92.4835	54.9948	1069.38	1047.95	373.087	370.583	280.971	273.808	96.0785	37.0613	3.1288	94.2284	1.88335
RUES2-GLR p59 DE Day3 2020-10-19	N	18	PluriControl	3500	4175	379.59	373.823	82.4989	54.2587	1122.76	1124.87	339.198	341.665	289.207	284.644	86.4557	42.4276	2.03593	96.3832	1.24551
RUES2-GLR p59 DE Day3 2020-10-19	N	19	PluriControl	3500	3173	368.833	362.487	90.6954	45.0814	1015.37	1012.22	319.405	323.563	284.855	279.792	100.497	36.0539	2.08005	94.6108	1.92247
RUES2-GLR p59 DE Day3 2020-10-19	N	20	PluriControl	3500	3427	370.788	368.306	68.3818	44.7849	1060.35	1069.13	326.369	326.305	291.467	293.284	69.3536	34.5194	0.992121	95.3896	0.904581
RUES2-GLR p59 DE Day3 2020-10-19	N	21	PluriControl	3500	3338	372.619	367.113	86.5608	46.0666	1090.23	1095.92	345.86	354.757	286.334	283.42	95.5255	37.7685	1.94727	95.4464	1.73757
RUES2-GLR p59 DE Day3 2020-10-19	N	22	PluriControl	3500	3788	384.007	380.279	76.2316	61.6665	1157.61	1157.97	371.689	368.442	288.5	287.757	80.1758	44.1844	1.84794	96.0665	1.10876
RUES2-GLR p59 DE Day3 2020-10-19	C	3	DEControl	1400	1847	2089.09	1987.72	1457.78	1607.69	327.727	299.935	107.442	73.7816	264.651	267.182	40.2014	32.8648	79.1012	7.03844	0.216567
RUES2-GLR p59 DE Day3 2020-10-19	C	4	DEControl	1400	858	1601.07	1473.26	1214.19	1544.39	288.312	272.093	76.7058	50.1719	503.871	262.8	2718.84	32.529	69.1142	2.7972	1.28205
RUES2-GLR p59 DE Day3 2020-10-19	C	5	DEControl	1400	842	1731.89	1725.33	1190.17	1524.46	294.742	277.269	77.2496	52.9733	261.308	260.663	40.1739	31.9752	74.9406	2.85036	0.356294
RUES2-GLR p59 DE Day3 2020-10-19	C	6	DEControl	1400	949	1847.16	1814.75	1287.63	1483.44	282.263	265.899	77.1472	42.1236	259.67	259.688	48.8937	33.274	76.7123	2.31823	0.632244
RUES2-GLR p59 DE Day3 2020-10-19	C	7	DEControl	1400	1448	1861.84	1765.02	1288.53	1547	301.859	278.781	85.1924	52.0548	268.423	269.401	43.0547	32.2006	77.1409	3.79834	0.552486
RUES2-GLR p59 DE Day3 2020-10-19	C	8	DMSOControl	1400	1081	1631.53	1586.36	1082.83	1409.13	297.292	275.547	85.2582	50.9851	270.413	272.668	41.4705	33.1272	75.3006	3.42276	0.277521
RUES2-GLR p59 DE Day3 2020-10-19	C	9	DMSOControl	1400	1144	1529	1443.27	1087.94	1459.21	297.342	279.863	78.1626	52.4566	271.777	272.958	40.8501	33.549	69.5804	2.62238	0.437063
RUES2-GLR p59 DE Day3 2020-10-19	C	10	DMSOControl	1400	1351	1714.5	1662.4	1119.97	1395.9	297.228	275.69	77.8764	52.4351	266.156	266.381	42.288	38.1458	77.2761	2.59067	0.370096
RUES2-GLR p59 DE Day3 2020-10-19	C	11	DMSOControl	1400	831	1598.72	1421.06	1282.33	1512.66	299.98	277.572	88.655	56.6146	272.988	273.104	53.589	36.1903	66.6667	3.61011	0.722022
RUES2-GLR p59 DE Day3 2020-10-19	C	12	DMSOControl	1400	819	1405.57	1249.2	1030.53	1269.77	298.319	278.274	82.1634	54.0156	270.679	270.084	51.6612	40.1681	68.8645	2.9304	0.854701
RUES2-GLR p59 DE Day3 2020-10-19	C	13	SB431542	1400	587	338.454	333.772	61.1839	53.4462	265.084	245.43	85.9459	36.2896	327.703	323.505	81.791	55.0845	1.02215	3.06644	1.70358
RUES2-GLR p59 DE Day3 2020-10-19	C	14	SB431542	1400	854	347.502	346.288	54.2241	55.1253	267.316	260.777	59.1998	34.5891	353.783	354.43	68.1065	56.6739	0.819672	0.936768	1.28806
RUES2-GLR p59 DE Day3 2020-10-19	C	15	SB431542	1400	1192	364.457	369.337	52.6843	47.7464	274.167	264.178	64.1695	33.0308	372.116	376.8	68.5142	54.2246	0.671141	1.42617	1.67785
RUES2-GLR p59 DE Day3 2020-10-19	C	16	SB431542	1400	409	345.062	338.542	116.456	57.5723	284.417	263.092	111.184	52.0393	358.422	341.384	211.42	62.2974	1.95599	3.17848	2.68949
RUES2-GLR p59 DE Day3 2020-10-19	C	17	SB431542	1400	909	356.603	343.874	271.004	58.9259	294.021	273.563	220.877	48.0229	368.349	359.844	243.582	66.0365	1.10011	2.42024	2.42024
RUES2-GLR p59 DE Day3 2020-10-19	D	3	DEControl	1400	1397	2254.12	2208.32	1575.47	1848.33	307.581	278.341	106.301	56.9763	261.521	262.153	37.0906	35.2266	79.3128	4.93915	0.143164
RUES2-GLR p59 DE Day3 2020-10-19	D	4	DEControl	1400	833	1693.95	1500.28	1326.81	1620.72	309.301	274.475	337.77	58.5286	293.32	270.262	397.514	33.2755	69.3877	2.88115	1.80072
RUES2-GLR p59 DE Day3 2020-10-19	D	5	DEControl	1400	1221	1711.51	1602.59	1283.35	1673.92	320.99	291.451	105.513	68.5777	273.377	274.392	44.623	34.853	70.4341	6.47011	0.4914
RUES2-GLR p59 DE Day3 2020-10-19	D	6	DEControl	1400	795	1394.4	1290.62	968.864	1279.51	284.201	265.528	80.3803	45.9903	264.577	263.505	47.7765	36.6632	70.0629	1.76101	0.628931
RUES2-GLR p59 DE Day3 2020-10-19	D	7	DEControl	1400	750	1326.17	1155.85	980.561	1113.34	291.781	269.788	78.2786	49.9547	266.935	267.223	42.0876	34.317	69.7333	2.8	0.133333
RUES2-GLR p59 DE Day3 2020-10-19	D	8	DMSOControl	1400	804	1315.69	1085.24	1029.31	1108.07	298.263	275.651	88.4782	52.2542	269.817	270.134	48.7005	38.8167	62.189	3.73134	0.62189
RUES2-GLR p59 DE Day3 2020-10-19	D	9	DMSOControl	1400	1214	1739.81	1716.94	1190.24	1557.78	299.501	279.341	81.4874	50.4536	268.867	270.833	41.8915	31.5912	76.112	3.62438	0.247117
RUES2-GLR p59 DE Day3 2020-10-19	D	10	DMSOControl	1400	1090	1389.88	1333.6	958.614	1264.18	292.11	270.425	85.6735	49.352	272.885	272.468	46.3138	37.0724	70.2752	2.75229	0.550459
RUES2-GLR p59 DE Day3 2020-10-19	D	11	DMSOControl	1400	1360	1433.49	1280.88	1025.2	1244.46	299.437	283.75	81.7739	57.7235	274.865	273.833	54.4812	40.0346	71.9853	3.08824	0.882353
RUES2-GLR p59 DE Day3 2020-10-19	D	12	DMSOControl	1400	1054	1480.26	1503.82	964.904	1346.21	302.193	285.448	84.2157	50.1097	277.708	279.776	41.0549	33.1984	72.9601	3.79507	0.379507
RUES2-GLR p59 DE Day3 2020-10-19	D	13	SB431542	1400	904	350.206	351.226	48.5156	50.5218	262.936	258.218	58.0829	28.9893	350.927	352.764	58.1197	53.8124	0.221239	0.774336	0.774336
RUES2-GLR p59 DE Day3 2020-10-19	D	14	SB431542	1400	620	364.782	360.215	58.8224	61.433	304.176	273.498	127.32	48.7686	369.09	364.829	67.126	64.8682	1.12903	5.32258	1.29032
RUES2-GLR p59 DE Day3 2020-10-19	D	15	SB431542	1400	457	396.947	376.698	475.929	52.6516	320.397	287.542	339.417	47.8198	396.266	383.483	362.191	54.2231	1.53173	3.06346	2.18818
RUES2-GLR p59 DE Day3 2020-10-19	D	16	SB431542	1400	654	351.165	350.753	61.1988	52.4255	284.961	264.13	86.0953	41.7752	351.069	351.049	79.7816	58.0571	1.22324	2.59939	2.9052
RUES2-GLR p59 DE Day3 2020-10-19	D	17	SB431542	1400	724	344.003	340.526	81.6345	46.3172	274.024	258.089	70.4076	39.959	351.036	347.314	94.3504	55.5337	1.10497	2.34807	2.07182
RUES2-GLR p59 DE Day3 2020-10-19	E	3	DEControl	1400	512	1639.91	1587.93	1179.49	1499.7	269.389	253.97	78.0524	44.22	265.102	263.329	70.578	40.8545	72.8515	1.5625	1.36719
RUES2-GLR p59 DE Day3 2020-10-19	E	4	DEControl	1400	804	1703.8	1582.88	1254.57	1607.78	285.64	264.81	85.6421	53.0986	260.919	260.903	47.5216	37.2955	72.6368	2.48756	0.124378
RUES2-GLR p59 DE Day3 2020-10-19	E	5	DEControl	1400	1442	2136.31	2042.47	1527.04	1782.84	308.322	281.101	99.1444	54.5597	268.274	269.633	45.2415	37.3289	78.294	5.20111	0.346741
RUES2-GLR p59 DE Day3 2020-10-19	E	6	DEControl	1400	1312	1905.64	1771.5	1394.08	1729.42	308.797	280.097	196.993	54.768	269.707	265.236	177.539	33.5987	76.2195	5.10671	0.533537
RUES2-GLR p59 DE Day3 2020-10-19	E	7	DEControl	1400	732	1634.38	1645.17	1113.18	1579.48	284.696	271.948	67.0164	47.8265	266.91	265.986	41.3483	39.0621	71.7213	1.36612	0.273224
RUES2-GLR p59 DE Day3 2020-10-19	E	8	DMSOControl	1400	745	1420.52	1357.71	993.285	1301.6	285.305	269.431	72.7817	43.5499	271.131	269.167	52.3791	38.644	70.8725	2.28188	0.671141
RUES2-GLR p59 DE Day3 2020-10-19	E	9	DMSOControl	1400	821	1358.73	1258.01	937.359	1185.75	279.167	262.144	70.4665	46.3653	265.247	263.98	48.1175	37.2815	70.7673	1.46163	0.609013
RUES2-GLR p59 DE Day3 2020-10-19	E	10	DMSOControl	1400	907	1532.31	1443.33	1084.43	1389.6	290.006	271.57	85.0705	50.9051	263.811	263.807	43.8652	40.8056	71.9956	3.0871	0.220507
RUES2-GLR p59 DE Day3 2020-10-19	E	11	DMSOControl	1400	1177	1375.8	1193.69	1002.52	1162.06	299.132	278.699	84.9397	49.7635	278.191	279.027	43.1157	37.3645	68.904	3.65336	0.424809
RUES2-GLR p59 DE Day3 2020-10-19	E	12	DMSOControl	1400	794	1332.03	1124.32	986.509	1110.05	302.38	277.867	86.7016	46.4676	276.896	279.929	36.1709	33.4564	66.3728	4.28212	0.125945
RUES2-GLR p59 DE Day3 2020-10-19	E	13	SB431542	1400	634	352.01	350.53	54.8023	52.1082	273.23	261.577	62.7087	37.4609	355.388	352.398	70.1333	53.4396	0.946372	1.26183	2.05047
RUES2-GLR p59 DE Day3 2020-10-19	E	14	SB431542	1400	423	348.676	347.605	64.682	55.3647	276.238	261.128	86.4406	37.8478	360.073	353.66	95.3146	62.4219	2.60047	3.30969	3.5461
RUES2-GLR p59 DE Day3 2020-10-19	E	15	SB431542	1400	378	334.215	327.565	59.4091	52.9837	285.793	266.456	79.9158	54.9741	331.056	324.813	67.743	63.4894	1.0582	2.6455	1.5873
RUES2-GLR p59 DE Day3 2020-10-19	E	16	SB431542	1400	542	341.537	341.428	67.2795	51.1949	281.589	257.836	115.192	36.4104	354.249	351.829	114.385	54.017	0.922509	3.50553	1.47601
RUES2-GLR p59 DE Day3 2020-10-19	E	17	SB431542	1400	635	353.291	351.449	52.3884	45.3453	281.878	271.489	63.2833	32.6068	367.519	364.927	71.5494	52.6101	0.629921	1.41732	1.88976
RUES2-GLR p59 DE Day3 2020-10-19	F	3	DEControl	2100	2316	2194.46	2217.59	1445.05	1661.27	312.646	286.592	92.3427	55.7658	266.119	266.288	47.164	35.3934	79.5769	5.00864	0.518135
RUES2-GLR p59 DE Day3 2020-10-19	F	4	DEControl	2100	1937	2022.8	2060.45	1299.6	1507.83	299.771	276.169	90.9741	53.3098	257.782	258.508	39.3367	37.0754	79.9174	3.82034	0.309757
RUES2-GLR p59 DE Day3 2020-10-19	F	5	DEControl	2100	1549	2034.12	2103.58	1281.84	1422.81	303.645	286.148	74.4205	55.7739	265.921	264.962	50.0475	37.2088	79.9871	2.06585	0.516462
RUES2-GLR p59 DE Day3 2020-10-19	F	6	DEControl	2100	1939	1872.82	1850.96	1165.24	1305.92	305.168	281.192	90.3743	58.5167	262.213	265.347	35.0255	35.9649	79.9897	4.58999	0.103146
RUES2-GLR p59 DE Day3 2020-10-19	F	7	DEControl	2100	2280	1833.65	1865.67	1109.05	1274.67	323.023	300.966	92.7426	61.072	276.093	276.603	43.7672	39.3823	80.9649	5	0.263158
RUES2-GLR p59 DE Day3 2020-10-19	F	8	DMSOControl	2100	2136	1788.95	1693.07	1272.71	1624.81	312.598	291.116	91.0535	53.4388	279.154	281.738	39.0433	38.3652	74.9532	4.63483	0.234082
RUES2-GLR p59 DE Day3 2020-10-19	F	9	DMSOControl	2100	2515	1852.38	1825.72	1225.54	1468.51	309.501	285.568	90.6955	53.556	273.305	276.425	39.2244	35.9353	78.3698	4.37376	0.238569
RUES2-GLR p59 DE Day3 2020-10-19	F	10	DMSOControl	2100	2712	2074.75	2071.8	1251.76	1368.5	312.622	290.051	92.1102	53.8725	273.928	277.372	43.4193	37.7425	84.4395	4.24041	0.294985
RUES2-GLR p59 DE Day3 2020-10-19	F	11	DMSOControl	2100	2425	2181.99	2176.13	1398.86	1587.58	319.459	296.956	91.1404	59.6524	277.827	283.032	40.0713	35.8937	82.268	4.74227	0.206186
RUES2-GLR p59 DE Day3 2020-10-19	F	12	DMSOControl	2100	2851	1932.82	1947.35	1156.03	1291.05	315.493	293.585	86.1344	54.6249	279.549	284.377	38.982	38.0509	82.7429	4.4195	0.105226
RUES2-GLR p59 DE Day3 2020-10-19	F	13	SB431542	2100	1386	351.449	351.485	49.515	45.6367	274.097	264.029	61.1784	35.5327	356.207	356.998	59.1621	49.163	0.2886	1.0101	1.1544
RUES2-GLR p59 DE Day3 2020-10-19	F	14	SB431542	2100	1941	350.126	351.988	46.9871	45.3661	273.179	266.94	61.5603	33.8878	362.884	364.896	61.1344	50.7005	0.309119	1.0304	0.978877
RUES2-GLR p59 DE Day3 2020-10-19	F	15	SB431542	2100	1354	355.6	357.541	52.6954	49.7145	281.355	272.87	62.538	39.9042	364.337	367.961	62.8612	56.6665	0.221566	1.10783	1.4771
RUES2-GLR p59 DE Day3 2020-10-19	F	16	SB431542	2100	1842	351.933	353.377	58.665	53.3269	277.958	268.051	72.7288	42.9939	365.016	368.687	72.091	57.2714	0.868621	1.90011	1.62866
RUES2-GLR p59 DE Day3 2020-10-19	F	17	SB431542	2100	1329	336.28	336.937	54.4496	55.3499	271.438	260.754	87.6336	40.2185	350.391	353.221	72.6533	64.4753	0.376223	2.40783	1.27916
RUES2-GLR p59 DE Day3 2020-10-19	G	3	DEControl	2100	1307	2622.47	2513.25	1792.43	1876.79	306.951	285.85	91.5094	53.762	267.845	269.395	51.6705	39.1985	84.6978	4.43764	0.535578
RUES2-GLR p59 DE Day3 2020-10-19	G	4	DEControl	2100	2965	2579.11	2544.04	1672.56	1849.63	319.216	293.43	102.359	60.8489	268.101	269.813	37.2153	36.1562	83.4401	5.22766	0.202361
RUES2-GLR p59 DE Day3 2020-10-19	G	5	DEControl	2100	1857	2366.02	2388.05	1562.01	1795.32	308.737	284.58	97.1535	56.7895	269.442	268.969	53.3708	36.2258	80.4523	4.84653	0.646204
RUES2-GLR p59 DE Day3 2020-10-19	G	6	DEControl	2100	1970	1829.21	1847.06	1227.23	1474.32	309.575	285.271	101.086	59.8051	295.48	268.113	1268.53	36.2651	77.1574	4.01015	0.558376
RUES2-GLR p59 DE Day3 2020-10-19	G	7	DEControl	2100	2141	1986.78	1939.06	1314.71	1520.04	311.957	289.241	87.4627	57.4997	267.762	272.593	36.463	35.959	79.8225	4.29706	0.140121
RUES2-GLR p59 DE Day3 2020-10-19	G	8	DMSOControl	2100	2714	2052.98	2013.05	1309.75	1502.16	307.474	285.318	88.8684	52.5352	273.119	274.724	55.987	35.7788	81.3191	3.75829	0.478998
RUES2-GLR p59 DE Day3 2020-10-19	G	9	DMSOControl	2100	2415	1850.16	1800.25	1238.37	1542.87	324.222	293.477	162.761	55.9192	283.398	283.208	161.501	36.8989	77.8882	5.54865	0.289855
RUES2-GLR p59 DE Day3 2020-10-19	G	10	DMSOControl	2100	2549	2239.62	2095.44	1551.15	1707.1	319.171	298.978	91.8981	56.4782	278.354	282.213	37.2359	35.443	81.7183	4.51157	0.117693
RUES2-GLR p59 DE Day3 2020-10-19	G	11	DMSOControl	2100	2909	2029.1	2070.56	1244.19	1381.49	310.742	290.255	82.3113	51.8228	282.413	285.352	41.1065	36.6439	81.54	3.57511	0.206256
RUES2-GLR p59 DE Day3 2020-10-19	G	12	DMSOControl	2100	3035	1875.11	1852.5	1251.9	1574.1	318.4	292.93	94.5282	54.3833	277.273	282.497	38.8415	36.0183	77.6936	5.07413	0.131796
RUES2-GLR p59 DE Day3 2020-10-19	G	13	SB431542	2100	1577	358.59	359.885	52.289	50.8102	272.788	263.118	65.7611	37.999	360.057	361.668	64.0471	54.4233	0.570704	1.6487	1.20482
RUES2-GLR p59 DE Day3 2020-10-19	G	14	SB431542	2100	1336	349.86	349.565	53.9801	56.2439	276.152	262.916	82.2305	43.5855	357.187	359.046	65.4841	62.5072	0.449102	2.32036	1.12275
RUES2-GLR p59 DE Day3 2020-10-19	G	15	SB431542	2100	1088	360.702	361.203	66.1122	50.9458	297.889	278.207	102.577	44.0836	380.914	379.361	112.618	57.2321	0.827206	3.125	2.48162
RUES2-GLR p59 DE Day3 2020-10-19	G	16	SB431542	2100	1337	362.681	363.76	55.6196	56.2602	284.795	274.149	67.248	38.6588	380.83	383.766	68.3356	60.1787	0.373972	1.2715	1.86986
RUES2-GLR p59 DE Day3 2020-10-19	G	17	SB431542	2100	1568	353.909	354.527	51.5405	53.2075	270.588	264.91	54.3613	34.5172	367.343	370.688	60.6024	56.2098	0.191327	0.765306	0.829082
RUES2-GLR p59 DE Day3 2020-10-19	H	3	DEControl	2100	3190	2671.72	2617.73	1660.24	1612.55	310.339	284.813	236.253	53.8651	264.046	262.986	211.091	35.492	87.0846	3.35423	0.188088
RUES2-GLR p59 DE Day3 2020-10-19	H	4	DEControl	2100	2465	2215.97	2156.94	1507.68	1689.44	311.641	290.66	92.9393	59.8348	267.353	270.479	38.0159	38.0672	79.2292	4.05679	0.162272
RUES2-GLR p59 DE Day3 2020-10-19	H	5	DEControl	2100	2442	2426.38	2440.36	1598.8	1775.55	316.163	289.436	100.06	57.7591	266.374	269.935	37.5687	33.8782	80.7944	6.38821	0.1638
RUES2-GLR p59 DE Day3 2020-10-19	H	6	DEControl	2100	2000	1731.02	1750.78	1083.59	1334.19	301.964	282.404	83.6059	57.1483	267.122	268.869	42.3311	34.7514	77.65	3.4	0.15
RUES2-GLR p59 DE Day3 2020-10-19	H	7	DEControl	2100	2549	1924.43	1876.13	1286.19	1515.41	317.923	291.037	96.7654	60.6191	269.815	273.208	36.704	36.2807	78.0306	5.92389	0.274617
RUES2-GLR p59 DE Day3 2020-10-19	H	8	DMSOControl	2100	1817	1801.93	1714.39	1249.37	1552.79	306.454	277.819	144.501	47.756	277.257	275.686	111.336	35.5364	75.2339	4.4579	0.275179
RUES2-GLR p59 DE Day3 2020-10-19	H	9	DMSOControl	2100	2144	1888.31	1834.42	1264.73	1484.26	304.653	285.997	86.5342	53.3351	273.09	275.175	48.4604	37.6076	79.1045	3.31157	0.326493
RUES2-GLR p59 DE Day3 2020-10-19	H	10	DMSOControl	2100	2094	1863.07	1820.46	1201.8	1428.5	313.028	289.483	92.8841	53.7398	277.858	278.925	40.1249	36.5928	80.1337	4.53677	0.238777
RUES2-GLR p59 DE Day3 2020-10-19	H	11	DMSOControl	2100	2505	2165.35	2131.51	1435.72	1686.12	324.983	298.964	96.1629	58.8533	280.198	282.936	40.8909	32.9122	80.0399	5.82834	0.319361
RUES2-GLR p59 DE Day3 2020-10-19	H	12	DMSOControl	2100	2443	1771.87	1746.76	1108.85	1249.7	308.581	288.336	88.9909	53.6909	274.52	276.768	44.251	36.7047	80.6386	3.47933	0.368399
RUES2-GLR p59 DE Day3 2020-10-19	H	13	SB431542	2100	1347	355.123	353.947	55.3902	57.3677	271.953	262.12	60.7821	41.1377	352.329	353.927	63.6202	62.5494	0.296956	1.11359	0.445434
RUES2-GLR p59 DE Day3 2020-10-19	H	14	SB431542	2100	1321	377.661	356.215	335.223	58.8296	280.712	267.5	79.3644	43.9576	777.557	377.081	4018.17	67.6436	2.04391	1.514	5.45042
RUES2-GLR p59 DE Day3 2020-10-19	H	15	SB431542	2100	895	348.54	347.725	59.5979	52.4396	289.858	270.835	96.105	37.5691	360.508	358.146	81.2135	53.9815	1.11732	2.7933	2.23464
RUES2-GLR p59 DE Day3 2020-10-19	H	16	SB431542	2100	1323	356.454	358.904	54.2545	56.7673	277.918	270.802	57.9085	39.6358	373.664	374.47	67.9025	64.1921	0.5291	1.20937	2.1164
RUES2-GLR p59 DE Day3 2020-10-19	H	17	SB431542	2100	1303	343.268	346.642	46.5532	46.5344	275.634	267.879	61.0242	36.3163	357.106	361.637	57.4017	49.2297	0.230238	1.30468	0.76746
RUES2-GLR p59 DE Day3 2020-10-19	I	3	DEControl	2800	2557	2069.78	2113.61	1346.68	1584.54	307.772	283.78	91.5576	54.7065	257.059	259.337	33.2973	33.0086	78.2949	4.41924	0.0782167
RUES2-GLR p59 DE Day3 2020-10-19	I	4	DEControl	2800	3091	2598.45	2606.35	1540.79	1584.71	322.128	296.829	93.5488	54.7554	272.867	275.168	41.9879	36.8441	87.1239	5.24102	0.291168
RUES2-GLR p59 DE Day3 2020-10-19	I	5	DEControl	2800	3770	2723.52	2671.2	1705.06	1693.34	327.61	301.933	96.8775	54.45	277.573	280.884	74.0572	35.6676	85.6499	5.33156	0.0795756
RUES2-GLR p59 DE Day3 2020-10-19	I	6	DEControl	2800	3091	1921.64	1949.39	1146.38	1224.64	311.507	289.941	84.1663	53.8243	273.293	274.77	44.6625	36.7981	80.5888	3.97929	0.388224
RUES2-GLR p59 DE Day3 2020-10-19	I	7	DEControl	2800	3166	2322.26	2334.3	1374.16	1393.58	330.021	305.144	95.5477	61.0297	282.705	284.236	41.8082	36.9442	84.7442	5.52748	0.252685
RUES2-GLR p59 DE Day3 2020-10-19	I	8	DMSOControl	2800	3791	2465.07	2457.27	1503.28	1612.67	319.401	294.502	95.666	51.8184	275.151	277.365	38.2794	35.1095	85.2809	4.69533	0.184648
RUES2-GLR p59 DE Day3 2020-10-19	I	9	DMSOControl	2800	2774	2100	2006.2	1386.66	1548.47	317.906	292.469	98.311	50.5233	281.818	285.28	45.8538	34.406	82.0476	4.86662	0.216294
RUES2-GLR p59 DE Day3 2020-10-19	I	10	DMSOControl	2800	2553	2185.74	2168.95	1310.57	1406.81	319.369	303.266	88.0616	55.6894	285.413	286.974	43.3292	41.4935	84.998	3.72111	0.195848
RUES2-GLR p59 DE Day3 2020-10-19	I	11	DMSOControl	2800	3131	2223.58	2192.42	1379.59	1572.53	317.24	298.679	84.7892	52.6323	285.076	287.774	42.8133	39.9961	84.1265	4.12009	0.255509
RUES2-GLR p59 DE Day3 2020-10-19	I	12	DMSOControl	2800	3134	2272.29	2192.98	1524.11	1726.35	316.133	297.69	94.9495	53.0059	280.02	284.399	39.8569	37.9761	81.4295	3.70134	0.0957243
RUES2-GLR p59 DE Day3 2020-10-19	I	13	SB431542	2800	2059	356.907	357.423	51.7771	53.805	274.908	269.106	59.5518	41.8405	369.928	371.555	64.0914	61.1543	0.631374	0.728509	1.06848
RUES2-GLR p59 DE Day3 2020-10-19	I	14	SB431542	2800	2084	357.436	355.916	51.8336	50.4692	286.756	272.081	101.062	36.3637	378.093	379.341	68.7506	60.2884	0.575816	2.30326	2.15931
RUES2-GLR p59 DE Day3 2020-10-19	I	15	SB431542	2800	1486	350.399	346.327	57.0072	54.8903	291.338	274.286	86.7188	44.6529	362.767	358.208	76.0285	59.5879	1.61507	3.43203	2.69179
RUES2-GLR p59 DE Day3 2020-10-19	I	16	SB431542	2800	1836	355.698	356.764	48.7645	50.6797	281.538	273.312	60.1012	30.9997	366.8	369.384	54.949	52.7502	0.163399	1.30719	0.708061
RUES2-GLR p59 DE Day3 2020-10-19	I	17	SB431542	2800	2089	346.297	347.49	49.9515	54.7554	270.237	267.856	52.0822	36.7077	357.589	362.944	58.9593	59.8155	0.143609	0.622307	0.622307
RUES2-GLR p59 DE Day3 2020-10-19	J	3	DEControl	2800	3687	2956.69	2946.89	1761.81	1859.51	316.615	293.136	90.5225	54.4781	264.269	267.028	40.577	31.6357	87.7136	5.01763	0.216979
RUES2-GLR p59 DE Day3 2020-10-19	J	4	DEControl	2800	3124	2171.26	2164.66	1390.62	1483.92	327.333	298.938	103.506	61.1335	269.672	269.849	44.1132	37.6225	83.3227	6.59411	0.416133
RUES2-GLR p59 DE Day3 2020-10-19	J	5	DEControl	2800	3639	2437.56	2395.32	1506.63	1582.07	326.808	302.086	102.78	60.2173	268.42	271.57	37.6957	35.4401	84.9134	5.5235	0.16488
RUES2-GLR p59 DE Day3 2020-10-19	J	6	DEControl	2800	2926	2281.3	2223.99	1513.82	1753.37	333.806	302.636	117.431	66.1684	275.741	278.639	41.9925	36.7485	81.8865	7.41627	0.307587
RUES2-GLR p59 DE Day3 2020-10-19	J	7	DEControl	2800	3371	2222.73	2211.85	1353.37	1475.56	332.671	307.705	97.1034	59.7073	280.044	280.827	44.1441	39.4564	83.0911	6.08128	0.326313
RUES2-GLR p59 DE Day3 2020-10-19	J	8	DMSOControl	2800	2273	2445.05	2385.02	1632.6	1869.05	306.017	290.559	82.1597	52.9911	278.086	281.365	42.0467	37.9397	83.8539	2.90365	0.175979
RUES2-GLR p59 DE Day3 2020-10-19	J	9	DMSOControl	2800	3427	2416.26	2364.04	1519.92	1587.42	324.987	301.694	91.199	58.7302	283.281	287.207	39.8487	35.7707	85.3516	5.33995	0.26262
RUES2-GLR p59 DE Day3 2020-10-19	J	10	DMSOControl	2800	2664	2241.17	2129.78	1521.76	1713.48	322.955	298.143	97.5984	55.8399	277.313	279.212	43.5867	39.6766	82.6201	5.06757	0.375375
RUES2-GLR p59 DE Day3 2020-10-19	J	11	DMSOControl	2800	2888	2109.1	2032.69	1364	1467.83	319.934	299.233	88.9941	49.5878	285.422	287.495	40.4531	33.9182	84.349	3.91274	0.207756
RUES2-GLR p59 DE Day3 2020-10-19	J	12	DMSOControl	2800	3656	2094.85	2163.78	1211.13	1312.86	328.069	307.299	87.3401	58.3314	284.724	289.504	39.1465	36.8656	83.7801	5.3337	0.136761
RUES2-GLR p59 DE Day3 2020-10-19	J	13	SB431542	2800	1753	353.238	353.031	55.071	53.5041	277.44	267.252	72.9224	35.6432	368.5	368.893	73.3878	57.0564	0.741586	1.7684	2.22476
RUES2-GLR p59 DE Day3 2020-10-19	J	14	SB431542	2800	1946	363.229	364.428	53.4949	52.3743	277.29	271.555	63.7509	35.5765	388.449	391.888	70.8369	58.7428	0.770812	1.13052	2.41521
RUES2-GLR p59 DE Day3 2020-10-19	J	15	SB431542	2800	1438	364.005	363.538	62.6004	63.8244	284.529	275.151	68.3675	35.5238	388.258	389.091	77.0369	69.4598	0.625869	1.73853	3.8943
RUES2-GLR p59 DE Day3 2020-10-19	J	16	SB431542	2800	2023	354.417	352.625	55.4995	55.9207	273.661	266.489	62.8936	39.6833	371.541	373.895	69.9683	64.4827	0.741473	0.988631	1.97726
RUES2-GLR p59 DE Day3 2020-10-19	J	17	SB431542	2800	1377	344.885	342.76	62.4737	44.7923	282.722	261.244	105.769	36.1636	468.051	361.339	2210.62	52.9644	0.726216	3.19535	2.10603
RUES2-GLR p59 DE Day3 2020-10-19	K	3	DEControl	2800	3729	2640.88	2551.54	1788.53	1909.19	333.715	304.005	110.473	64.5672	267.737	270.154	39.0149	35.5854	82.8909	7.34781	0.268168
RUES2-GLR p59 DE Day3 2020-10-19	K	4	DEControl	2800	3305	2249.26	2218.57	1457.56	1640.48	328.471	298.612	108.98	65.2255	268.374	270.072	50.2225	35.1539	81.4826	6.74735	0.453858
RUES2-GLR p59 DE Day3 2020-10-19	K	5	DEControl	2800	3781	2964.8	3012.3	1652.56	1669.56	324.782	302.512	89.866	55.8644	275.598	278.624	36.9243	35.1524	89.1299	4.78709	0.211584
RUES2-GLR p59 DE Day3 2020-10-19	K	6	DEControl	2800	3195	2200.51	2252.04	1424.23	1681.48	330.955	298.413	110.906	62.6473	272.833	275.129	37.7536	34.9597	78.4664	7.16745	0.156495
RUES2-GLR p59 DE Day3 2020-10-19	K	7	DEControl	2800	2970	2209.82	2252.82	1333.15	1486.04	317.108	294.24	93.6551	56.7828	273.047	275.156	44.1272	38.8486	83.6027	4.91582	0.3367
RUES2-GLR p59 DE Day3 2020-10-19	K	8	DMSOControl	2800	3143	1938.87	1942.34	1192.19	1353.94	313.377	296.712	77.1585	52.619	282.715	286.783	40.2308	38.0198	81.9917	3.05441	0.159084
RUES2-GLR p59 DE Day3 2020-10-19	K	9	DMSOControl	2800	3026	1967.19	1966.5	1211.51	1378.98	314.282	290.195	99.8408	54.8606	271.684	275.124	37.0852	35.7181	81.8572	4.62657	0.132188
RUES2-GLR p59 DE Day3 2020-10-19	K	10	DMSOControl	2800	3357	2227.41	2207.21	1365.54	1432.84	316.668	296.523	84.1045	54.579	276.175	280.46	36.3585	35.3393	83.9738	3.93208	0.059577
RUES2-GLR p59 DE Day3 2020-10-19	K	11	DMSOControl	2800	3492	2208.49	2216.96	1392.72	1547.23	314.801	294.716	82.5307	54.9318	277.453	281.637	40.198	38.813	82.8465	3.72279	0.171821
RUES2-GLR p59 DE Day3 2020-10-19	K	12	DMSOControl	2800	3824	2146.06	2104.22	1320.49	1427.45	319.824	299.375	93.3995	54.1557	282.06	287.909	38.6111	37.979	84.8588	4.31485	0.0784519
RUES2-GLR p59 DE Day3 2020-10-19	K	13	SB431542	2800	1996	357.763	359.743	51.4804	51.3543	285.195	276.792	63.581	39.1177	365.729	370.372	59.8926	54.2009	0.400802	1.60321	1.2024
RUES2-GLR p59 DE Day3 2020-10-19	K	14	SB431542	2800	1730	345.656	344.469	54.2477	49.5885	268.794	265.49	54.985	32.6357	359.82	361.482	69.6269	56.8547	0.635838	0.751445	2.13873
RUES2-GLR p59 DE Day3 2020-10-19	K	15	SB431542	2800	1984	353.053	350.923	52.9056	52.7717	288.945	276.276	98.9537	44.3772	360.853	360.068	65.0016	59.6598	0.403226	2.01613	1.46169
RUES2-GLR p59 DE Day3 2020-10-19	K	16	SB431542	2800	2272	349.017	348.675	52.0595	50.8517	272.663	267.817	53.763	33.0093	357.943	360.834	61.5195	55.3492	0.572183	0.836268	0.880282
RUES2-GLR p59 DE Day3 2020-10-19	K	17	SB431542	2800	1947	352.318	353.784	49.9166	49.6108	277.589	269.923	58.2148	37.1258	376.311	377.731	60.0175	54.2261	0.359527	1.02722	1.33539
RUES2-GLR p59 DE Day3 2020-10-19	L	3	DEControl	3500	4800	3507.57	3487.91	1902.58	1903.96	320.587	300.392	88.0986	53.1141	266.875	270.553	37.862	34.5653	91.8542	4.02083	0.166667
RUES2-GLR p59 DE Day3 2020-10-19	L	4	DEControl	3500	4846	2991.16	2980.43	1798.67	1823.7	342.282	308.31	123.314	59.0312	273.105	277.497	34.2193	35.234	87.7012	7.96533	0.0619067
RUES2-GLR p59 DE Day3 2020-10-19	L	5	DEControl	3500	4396	2796.37	2791.35	1684.58	1797.94	341.097	313.894	103.702	57.106	281.94	285.485	37.3014	36.5164	86.7834	6.84713	0.136488
RUES2-GLR p59 DE Day3 2020-10-19	L	6	DEControl	3500	3794	2685.06	2609.62	1598.31	1605.71	321.267	301.271	90.3936	56.5768	272.375	275.215	37.4916	36.3556	88.0074	3.9009	0.210859
RUES2-GLR p59 DE Day3 2020-10-19	L	7	DEControl	3500	4704	2775.91	2777.62	1589.21	1615.5	335.222	312.75	96.7419	58.8993	284.794	288.134	37.0738	36.085	89.1369	5.69728	0.14881
RUES2-GLR p59 DE Day3 2020-10-19	L	8	DMSOControl	3500	3989	2400.92	2311.35	1546.69	1690.22	318.124	299.262	86.2329	52.7049	279.566	283.899	39.4544	37.79	85.5603	3.81048	0.125345
RUES2-GLR p59 DE Day3 2020-10-19	L	9	DMSOControl	3500	3864	2194	2172.32	1280.09	1428.24	325.319	306.527	90.7409	49.5996	289.47	292.982	42.0316	37.2674	86.2836	4.24431	0.258799
RUES2-GLR p59 DE Day3 2020-10-19	L	10	DMSOControl	3500	3475	2123.86	2083.95	1328.34	1489.48	325.578	307.204	89.56	54.7687	289.916	291.054	46.2822	42.1651	84.6906	4.66187	0.201439
RUES2-GLR p59 DE Day3 2020-10-19	L	11	DMSOControl	3500	4306	2265.58	2240.73	1357.27	1431.26	325.737	307.901	94.2485	53.0526	291.691	296.158	48.0318	37.9012	85.764	3.92476	0.325128
RUES2-GLR p59 DE Day3 2020-10-19	L	12	DMSOControl	3500	3922	2125.89	2100.22	1256.98	1362.57	323.995	305.486	89.3753	57.7554	284.45	288.688	40.9024	39.4816	86.2825	4.13055	0.127486
RUES2-GLR p59 DE Day3 2020-10-19	L	13	SB431542	3500	2647	353.685	351.369	54.68	54.3833	279.419	272.333	60.83	33.0798	374.376	372.674	71.4173	59.5249	0.528901	1.09558	1.81337
RUES2-GLR p59 DE Day3 2020-10-19	L	14	SB431542	3500	2300	360.111	357.877	52.8915	51.5641	284.957	278.062	60.9082	35.7462	380.87	380.099	67.7034	58.4552	0.652174	1.30435	1.91304
RUES2-GLR p59 DE Day3 2020-10-19	L	15	SB431542	3500	2534	359.851	360.52	52.9338	50.4136	283.462	279.939	61.0592	38.2592	385.277	386.887	69.2976	59.5768	0.513023	1.14444	1.9337
RUES2-GLR p59 DE Day3 2020-10-19	L	16	SB431542	3500	2843	360.425	357.374	56.574	54.3877	281.003	274.056	61.6962	38.7433	377.305	375.977	68.8461	61.8215	0.949701	1.16075	2.95463
RUES2-GLR p59 DE Day3 2020-10-19	L	17	SB431542	3500	2262	347.595	347.771	51.8014	51.1275	289.012	277.2	86.0672	37.0109	377.31	379.971	69.396	56.3314	0.574713	3.13882	1.5473
RUES2-GLR p59 DE Day3 2020-10-19	M	3	DEControl	3500	4596	2343.13	2337.34	1343.65	1361.63	335.294	306.453	113.838	61.0223	273.654	276.704	45.0779	36.0672	87.1192	6.52742	0.10879
RUES2-GLR p59 DE Day3 2020-10-19	M	4	DEControl	3500	4196	2501.84	2476.95	1402.87	1339.83	325.835	302.328	95.7927	58.1239	275.115	276.849	44.3021	36.9538	88.3937	4.90944	0.21449
RUES2-GLR p59 DE Day3 2020-10-19	M	5	DEControl	3500	4645	2959.79	2988.93	1695.98	1705.05	333.581	311.062	93.7871	54.5908	281.957	284.75	43.2962	36.8619	89.408	5.29602	0.279871
RUES2-GLR p59 DE Day3 2020-10-19	M	6	DEControl	3500	3552	2406.5	2410.07	1483.6	1611.26	334.114	305.68	111.401	58.4485	281.036	284.722	52.4917	36.2896	84.5439	7.01013	0.422297
RUES2-GLR p59 DE Day3 2020-10-19	M	7	DEControl	3500	3691	2433.06	2430.49	1543.01	1739.5	338.754	306.975	114.622	63.0757	279.025	281.495	46.9585	39.0665	82.9856	7.2609	0.352208
RUES2-GLR p59 DE Day3 2020-10-19	M	8	DMSOControl	3500	3877	2748.06	2739.46	1659.45	1728.95	326.647	308.013	88.7267	58.456	279.681	283.411	38.6854	39.2355	87.6193	4.61697	0.128966
RUES2-GLR p59 DE Day3 2020-10-19	M	9	DMSOControl	3500	4729	2388.19	2369.21	1409.83	1460.72	327.618	306.236	96.6548	50.0763	286.943	290.646	45.1397	37.0976	87.1432	4.84246	0.190315
RUES2-GLR p59 DE Day3 2020-10-19	M	10	DMSOControl	3500	4487	2360.26	2357.4	1378.62	1407.4	329.262	307.879	94.325	55.0252	287.739	291.372	40.3187	39.5068	87.3189	5.10363	0.178293
RUES2-GLR p59 DE Day3 2020-10-19	M	11	DMSOControl	3500	3960	2750.96	2753.22	1645.01	1778.16	318.617	300.622	95.8253	50.4855	284.161	288.825	40.311	38.985	88.0556	3.63636	0.126263
RUES2-GLR p59 DE Day3 2020-10-19	M	12	DMSOControl	3500	4103	2259.08	2209.4	1438.07	1628.53	338.854	311.275	111.639	63.4464	282.812	286.041	41.1102	37.6655	83.0368	6.84865	0.194979
RUES2-GLR p59 DE Day3 2020-10-19	M	13	SB431542	3500	2977	361.314	358.245	230.607	49.1793	284.401	275.91	205.364	32.8707	377.301	376.369	202.962	55.169	0.40309	0.839772	1.17568
RUES2-GLR p59 DE Day3 2020-10-19	M	14	SB431542	3500	2418	356.986	358.216	50.1371	47.1637	281.268	274.457	69.2798	32.0093	385.591	388.748	64.7377	53.8184	0.206782	1.40612	2.52275
RUES2-GLR p59 DE Day3 2020-10-19	M	15	SB431542	3500	2815	351.631	351.072	47.3914	44.9806	279.617	273.736	56.4434	38.5031	369.084	369.686	59.9862	53.1557	0.319716	0.923623	0.852575
RUES2-GLR p59 DE Day3 2020-10-19	M	16	SB431542	3500	2964	356.485	356.301	53.4901	54.2787	283.322	278.579	60.1053	38.0428	372.746	373.598	66.2859	58.986	0.641026	0.910931	1.417
RUES2-GLR p59 DE Day3 2020-10-19	M	17	SB431542	3500	2856	354.806	355.534	48.2072	50.3424	284.075	278.161	60.4264	34.3971	370.467	373.26	56.9078	54.1156	0.140056	1.08543	0.595238
RUES2-GLR p59 DE Day3 2020-10-19	N	3	DEControl	3500	3902	2754.23	2725.09	1584.8	1600.7	325.666	302.56	95.9539	55.0378	270.25	272.813	36.5184	36.6224	88.1343	4.94618	0.205023
RUES2-GLR p59 DE Day3 2020-10-19	N	4	DEControl	3500	4869	3256.13	3278.9	1902.55	2013.22	334.106	309.027	105.184	56.9615	276.316	279.089	38.6352	34.1309	89.1764	5.79174	0.287533
RUES2-GLR p59 DE Day3 2020-10-19	N	5	DEControl	3500	3925	2776.35	2829.84	1681.6	1811.8	342.779	312.968	116.371	60.4397	281.458	283.485	42.3205	38.2036	85.707	7.00637	0.229299
RUES2-GLR p59 DE Day3 2020-10-19	N	6	DEControl	3500	3780	2790	2771.81	1668.78	1743.49	328.43	303.09	105.737	54.3499	276.345	280.35	36.9305	35.36	87.8836	5.2381	0.15873
RUES2-GLR p59 DE Day3 2020-10-19	N	7	DEControl	3500	4086	2852.21	2850.27	1633.2	1576.36	333.156	308.514	99.6588	61.2158	278.046	282.034	39.5475	38.4001	87.4939	6.11845	0.0734214
RUES2-GLR p59 DE Day3 2020-10-19	N	8	DMSOControl	3500	4608	2668.73	2665.72	1440.66	1387.54	320.673	302.566	88.2345	55.2639	280.51	284.316	40.601	38.9197	90.1042	3.77604	0.15191
RUES2-GLR p59 DE Day3 2020-10-19	N	9	DMSOControl	3500	4218	2200.48	2178.58	1316.71	1397.22	322.909	301.796	93.2438	53.8465	283.474	287.229	41.2427	40.4246	85.0403	4.71788	0.165955
RUES2-GLR p59 DE Day3 2020-10-19	N	10	DMSOControl	3500	4238	2134.92	2114.24	1338.44	1502.44	324.677	300.522	93.5323	59.4649	283.554	286.923	37.9974	36.4512	82.7277	4.71921	0.141576
RUES2-GLR p59 DE Day3 2020-10-19	N	11	DMSOControl	3500	4215	2315.79	2312.38	1361.42	1475.93	330.839	305.643	97.3754	56.8533	283.882	288.208	39.7119	36.2214	86.0261	5.69395	0.237248
RUES2-GLR p59 DE Day3 2020-10-19	N	12	DMSOControl	3500	4044	2487.08	2498.11	1417.53	1423.87	314.682	296.462	84.712	52.7346	279.711	283.816	39.5142	37.3304	88.1553	4.00593	0.148368
RUES2-GLR p59 DE Day3 2020-10-19	N	13	SB431542	3500	2336	356	355.113	47.877	49.527	273.423	267.117	56.9368	33.1472	364.818	367.674	55.4008	53.9837	0.171233	1.0274	0.684931
RUES2-GLR p59 DE Day3 2020-10-19	N	14	SB431542	3500	2192	348.428	348.498	49.7156	47.1674	280.071	273.392	70.8583	35.0235	365.1	365.709	62.1357	52.1594	0.319343	1.18613	0.866788
RUES2-GLR p59 DE Day3 2020-10-19	N	15	SB431542	3500	2116	348.462	350.411	52.4581	49.2794	272.875	265.022	71.2214	35.4134	368.264	368.385	67.1415	55.9429	0.47259	1.32325	1.37051
RUES2-GLR p59 DE Day3 2020-10-19	N	16	SB431542	3500	2523	344.343	343.19	50.6083	52.0808	275.741	269.009	61.4653	39.366	360.336	361.083	63.6722	58.0942	0.396354	1.2287	1.26833
RUES2-GLR p59 DE Day3 2020-10-19	N	17	SB431542	3500	2382	344.084	345.63	48.7571	48.5707	282.09	276.091	63.7287	39.0591	371.707	374.108	66.1482	58.6598	0.335852	1.51133	1.55332

## Sheet: DMSO Tolerance Test
Plate	Row	Column	Treatment	Conc. DMSO (%)/ SB431542 (µM)	Cell Count	Sox2 Well Mean	Sox17 Well Mean	Bra Well Mean	Sox2 Well Median	Sox17 Well Median	Bra Well Median	%Sox2+ Cells	%Sox17+ Cells	%Bra+ Cells
GLR-DE_DMSO-SB_(11_5)_2020-11-12	3	4	DMSO	0	4889	335.909	895.581	250.654	307.98	865.179	254.639	33.3811	69.3802	0.0409082
GLR-DE_DMSO-SB_(11_5)_2020-11-12	3	5	DMSO	0	4499	320.55	726.88	249.806	296.98	682.014	252.358	27.7395	64.1254	0.333407
GLR-DE_DMSO-SB_(11_5)_2020-11-12	3	6	DMSO	0	4489	323.891	734.136	252.326	298.322	699.681	255.886	27.935	65.8721	0.289597
GLR-DE_DMSO-SB_(11_5)_2020-11-12	3	7	DMSO	0	4633	320.466	832.101	249.455	296.07	810.771	254.083	27.1314	69.8252	0.0863371
GLR-DE_DMSO-SB_(11_5)_2020-11-12	3	8	DMSO	0	4382	326.125	740.299	256.342	302.055	704.99	259.793	29.9863	65.7462	0.228206
GLR-DE_DMSO-SB_(11_5)_2020-11-12	3	9	DMSO	0	4532	327.58	690.905	258.627	303.667	652.635	262.058	29.8323	61.7387	0.154457
GLR-DE_DMSO-SB_(11_5)_2020-11-12	3	10	DMSO	0	4238	327.355	665.644	259.154	302.979	599.343	262.904	30.4153	57.7631	0.283152
GLR-DE_DMSO-SB_(11_5)_2020-11-12	3	11	DMSO	0	4426	328.422	697.977	259.76	306.813	660.073	263.866	30.8179	62.5395	0.18075
GLR-DE_DMSO-SB_(11_5)_2020-11-12	4	4	DMSO	0.05	4271	320.698	864.774	248.182	293.29	795.389	250.567	28.2135	64.1302	0.0234137
GLR-DE_DMSO-SB_(11_5)_2020-11-12	4	5	DMSO	0.05	3893	307.179	705.046	247.28	283.892	650.725	250.709	21.3974	60.3904	0.128436
GLR-DE_DMSO-SB_(11_5)_2020-11-12	4	6	DMSO	0.05	4297	306.318	673.94	251.266	286.365	623.818	255.202	21.8292	60.5073	0.0930882
GLR-DE_DMSO-SB_(11_5)_2020-11-12	4	7	DMSO	0.05	4279	311.892	664.291	247.254	287.564	570.231	250.871	23.814	56.6487	0.16359
GLR-DE_DMSO-SB_(11_5)_2020-11-12	4	8	DMSO	0.05	4137	309.374	677.476	252.955	288.274	626.755	256.008	21.9483	61.2038	0.265893
GLR-DE_DMSO-SB_(11_5)_2020-11-12	4	9	DMSO	0.05	4068	308.945	619.445	255.124	287.189	531.069	259.747	22.1239	54.1544	0.221239
GLR-DE_DMSO-SB_(11_5)_2020-11-12	4	10	DMSO	0.05	3948	310.06	581.873	256.065	290.382	504.983	259.936	22.2391	53.0395	0.151976
GLR-DE_DMSO-SB_(11_5)_2020-11-12	4	11	DMSO	0.05	3789	312.199	596.295	255.165	291.33	516.27	258.542	24.4128	54.1832	0.316706
GLR-DE_DMSO-SB_(11_5)_2020-11-12	5	4	DMSO	0.1	5003	318.665	761.762	247.103	291.614	681.466	250.419	26.684	61.4231	0.039976
GLR-DE_DMSO-SB_(11_5)_2020-11-12	5	5	DMSO	0.1	4296	298.562	636.162	246.996	278.64	549.232	249.776	19.2505	55.121	0
GLR-DE_DMSO-SB_(11_5)_2020-11-12	5	6	DMSO	0.1	4421	304.482	669.23	248.417	285.518	574.965	253.415	20.9002	57.34	0.0452386
GLR-DE_DMSO-SB_(11_5)_2020-11-12	5	7	DMSO	0.1	3932	304.19	616.791	247.775	282.493	534.976	250.369	21.058	54.3235	0.254323
GLR-DE_DMSO-SB_(11_5)_2020-11-12	5	8	DMSO	0.1	4164	313.47	624.716	250.278	288.971	528.198	253.745	23.8473	54.5149	0.120077
GLR-DE_DMSO-SB_(11_5)_2020-11-12	5	9	DMSO	0.1	3664	296.977	590.573	251.588	281.531	493.028	254.413	17.7675	51.7194	0.0818777
GLR-DE_DMSO-SB_(11_5)_2020-11-12	5	10	DMSO	0.1	4405	317.791	602.707	256.365	295.215	491.786	260.973	25.5165	51.5778	0.0454029
GLR-DE_DMSO-SB_(11_5)_2020-11-12	5	11	DMSO	0.1	3735	295.598	668.637	253.049	279.511	583.15	257.331	16.5997	58.0723	0.21419
GLR-DE_DMSO-SB_(11_5)_2020-11-12	6	4	DMSO	0.2	4456	299.977	860.075	245.269	279.356	715.784	248.131	18.9408	61.3779	0.157092
GLR-DE_DMSO-SB_(11_5)_2020-11-12	6	5	DMSO	0.2	3922	293.996	646.956	243.628	269.701	508.675	245.964	18.307	52.0653	0.229475
GLR-DE_DMSO-SB_(11_5)_2020-11-12	6	6	DMSO	0.2	4263	296.588	609.781	246.368	279.413	504.557	249.407	18.3673	53.0143	0.164204
GLR-DE_DMSO-SB_(11_5)_2020-11-12	6	7	DMSO	0.2	3726	291.444	556.429	246.013	273.164	434.622	248.994	15.6736	46.6452	0.295223
GLR-DE_DMSO-SB_(11_5)_2020-11-12	6	8	DMSO	0.2	4287	299.762	585.331	252.577	279.642	488.05	255.976	18.6377	51.7378	0.0933053
GLR-DE_DMSO-SB_(11_5)_2020-11-12	6	9	DMSO	0.2	3744	299.585	551.062	256.305	281.394	434.748	259.098	17.735	46.9284	0.267094
GLR-DE_DMSO-SB_(11_5)_2020-11-12	6	10	DMSO	0.2	4237	298.241	573.382	256.975	281.89	462.156	260.656	17.1112	49.5398	0.330422
GLR-DE_DMSO-SB_(11_5)_2020-11-12	6	11	DMSO	0.2	4641	304.318	575.922	260.778	288.416	456.888	264.434	18.4874	48.761	0.0861883
GLR-DE_DMSO-SB_(11_5)_2020-11-12	7	4	DMSO	0.3	4233	288.193	609.534	245.273	272.517	491.785	246.887	13.6546	51.7364	0.401606
GLR-DE_DMSO-SB_(11_5)_2020-11-12	7	5	DMSO	0.3	4063	282.556	598.184	245.894	266.789	444.054	247.569	12.4785	48.2894	0.196899
GLR-DE_DMSO-SB_(11_5)_2020-11-12	7	6	DMSO	0.3	3924	285.111	517.098	243.823	269.747	379.776	245.797	14.2966	41.8451	0.178389
GLR-DE_DMSO-SB_(11_5)_2020-11-12	7	7	DMSO	0.3	4152	283.736	617.06	249.678	268.952	435.382	253.592	12.6204	47.5915	0.144509
GLR-DE_DMSO-SB_(11_5)_2020-11-12	7	8	DMSO	0.3	4001	288.146	509.156	247.74	272.034	379.335	251.716	14.5964	40.3149	0.174956
GLR-DE_DMSO-SB_(11_5)_2020-11-12	7	9	DMSO	0.3	3642	284.348	479.697	257.472	270.077	361.749	255.345	12.5206	36.4635	0.823723
GLR-DE_DMSO-SB_(11_5)_2020-11-12	7	10	DMSO	0.3	3894	287.671	499.553	256.889	276.216	380.101	261.205	12.8403	40.0103	0.205444
GLR-DE_DMSO-SB_(11_5)_2020-11-12	7	11	DMSO	0.3	3970	288.414	529.004	253.685	274.5	422.736	256.754	13.3501	45.2141	0.377834
GLR-DE_DMSO-SB_(11_5)_2020-11-12	8	4	DMSO	0.4	4119	291.109	477.879	245.115	271.382	345.381	247.411	15.3921	34.4501	0.242777
GLR-DE_DMSO-SB_(11_5)_2020-11-12	8	5	DMSO	0.4	4171	279.833	499.256	248.295	265.389	364.962	250.622	10.9087	38.2642	0.335651
GLR-DE_DMSO-SB_(11_5)_2020-11-12	8	6	DMSO	0.4	3460	279.297	470.533	242.499	262.31	343.74	243.66	11.5607	34.7399	0.491329
GLR-DE_DMSO-SB_(11_5)_2020-11-12	8	7	DMSO	0.4	4067	274.377	540.922	251.663	265.273	400.142	250.657	9.14679	43.4227	0.196705
GLR-DE_DMSO-SB_(11_5)_2020-11-12	8	8	DMSO	0.4	4131	276.652	539.058	249.463	264.81	384.176	252.401	10.4333	41.8543	0.217865
GLR-DE_DMSO-SB_(11_5)_2020-11-12	8	9	DMSO	0.4	4035	283.438	513.863	255.364	271.979	381.561	259.029	11.7968	40.7683	0.223048
GLR-DE_DMSO-SB_(11_5)_2020-11-12	8	10	DMSO	0.4	3710	279.687	461.621	257.108	270.971	361.179	259.554	9.13747	34.8787	0.215633
GLR-DE_DMSO-SB_(11_5)_2020-11-12	8	11	DMSO	0.4	3418	285.555	450.369	258.582	273.172	345.918	260.6	12.8438	31.6852	0.555881
GLR-DE_DMSO-SB_(11_5)_2020-11-12	9	4	DMSO	0.5	4146	273.273	497.34	243.69	262.763	358.617	245.144	9.23782	38.3261	0.192957
GLR-DE_DMSO-SB_(11_5)_2020-11-12	9	5	DMSO	0.5	3857	271.311	428.128	243.643	259.488	332.655	246.903	8.78921	28.364	0.181488
GLR-DE_DMSO-SB_(11_5)_2020-11-12	9	6	DMSO	0.5	4080	272.986	421.489	242.496	261.067	328.485	244.619	9.36274	26.4216	0.392157
GLR-DE_DMSO-SB_(11_5)_2020-11-12	9	7	DMSO	0.5	4190	274.363	437.66	251.869	265.426	335.774	254.458	8.32936	28.9737	0.143198
GLR-DE_DMSO-SB_(11_5)_2020-11-12	9	8	DMSO	0.5	3807	273.922	473.271	249.631	262.403	339.313	252.334	9.06225	31.5209	0.288941
GLR-DE_DMSO-SB_(11_5)_2020-11-12	9	9	DMSO	0.5	3846	283.75	436.621	252.866	269.791	340.291	256.046	11.9085	28.9912	0.416017
GLR-DE_DMSO-SB_(11_5)_2020-11-12	9	10	DMSO	0.5	4087	279.058	432.68	254.847	269.925	339.709	255.779	9.86053	27.9178	0.415953
GLR-DE_DMSO-SB_(11_5)_2020-11-12	9	11	DMSO	0.5	3486	277.716	447.001	256.083	267.139	336.37	257.723	9.9541	29.3173	0.688468
GLR-DE_DMSO-SB_(11_5)_2020-11-12	10	4	DMSO	0.6	4564	277.171	417.709	245.345	264.512	326.918	248.266	9.68449	25.1315	0.219106
GLR-DE_DMSO-SB_(11_5)_2020-11-12	10	5	DMSO	0.6	4169	270.15	401.608	247.253	261.715	325.385	248.964	7.6757	22.0916	0.287839
GLR-DE_DMSO-SB_(11_5)_2020-11-12	10	6	DMSO	0.6	3774	265.367	401.372	245.388	259.385	324.851	248.039	5.80286	22.9995	0.317965
GLR-DE_DMSO-SB_(11_5)_2020-11-12	10	7	DMSO	0.6	3896	276.904	383.069	249.265	265.401	323.336	250.566	8.98357	19.1478	0.539014
GLR-DE_DMSO-SB_(11_5)_2020-11-12	10	8	DMSO	0.6	3929	270.727	433.406	248.139	262.906	328.403	250.871	8.01731	26.6989	0.203614
GLR-DE_DMSO-SB_(11_5)_2020-11-12	10	9	DMSO	0.6	4048	274.103	434.467	258.88	265.841	338	260.204	7.88043	26.2352	0.296443
GLR-DE_DMSO-SB_(11_5)_2020-11-12	10	10	DMSO	0.6	3534	272.673	399.983	252.832	264.776	325.983	254.279	7.69666	22.0147	0.481041
GLR-DE_DMSO-SB_(11_5)_2020-11-12	10	11	DMSO	0.6	2964	276.635	369.096	253.2	267.705	316.654	256.514	9.04184	15.6208	0.573549
GLR-DE_DMSO-SB_(11_5)_2020-11-12	11	4	DMSO	0.7	4138	272.239	371.862	248.167	263.819	314.167	250.522	7.56404	16.6747	0.241663
GLR-DE_DMSO-SB_(11_5)_2020-11-12	11	5	DMSO	0.7	3461	276.075	365.849	247.406	262.856	310.699	249.077	10.2572	15.4291	0.491188
GLR-DE_DMSO-SB_(11_5)_2020-11-12	11	6	DMSO	0.7	3936	265.66	367.14	245.408	259.219	310.676	247.159	5.97053	16.1331	0.279472
GLR-DE_DMSO-SB_(11_5)_2020-11-12	11	7	DMSO	0.7	3782	267.385	379.467	248.191	260.58	320.473	250.942	6.42517	17.5833	0.343733
GLR-DE_DMSO-SB_(11_5)_2020-11-12	11	8	DMSO	0.7	4463	271.226	371.913	253.607	263.37	321.715	255.403	6.52028	16.1102	0.31369
GLR-DE_DMSO-SB_(11_5)_2020-11-12	11	9	DMSO	0.7	4030	273.77	376.955	253.955	265.41	322.56	256.663	8.08933	17.2208	0.297767
GLR-DE_DMSO-SB_(11_5)_2020-11-12	11	10	DMSO	0.7	3459	272.193	363.534	251.951	262.118	313.732	253.154	7.80572	15.5247	0.607112
GLR-DE_DMSO-SB_(11_5)_2020-11-12	11	11	DMSO	0.7	3749	271.147	390.026	252.548	261.542	326.553	255.89	7.28194	19.0184	0.640171
GLR-DE_DMSO-SB_(11_5)_2020-11-12	12	4	DMSO	0.8	3972	267.272	377.718	242.663	256.942	310.36	245.179	7.65357	17.2457	0.302115
GLR-DE_DMSO-SB_(11_5)_2020-11-12	12	5	DMSO	0.8	3872	266.382	379.103	246.68	257.483	316.034	249.505	6.7407	17.562	0.284091
GLR-DE_DMSO-SB_(11_5)_2020-11-12	12	6	DMSO	0.8	3841	269.375	357.3	243.906	260.426	309.662	246.173	7.78443	14.163	0.234314
GLR-DE_DMSO-SB_(11_5)_2020-11-12	12	7	DMSO	0.8	4013	266.87	363.961	248.424	260.124	314.666	250.485	6.30451	14.6275	0.24919
GLR-DE_DMSO-SB_(11_5)_2020-11-12	12	8	DMSO	0.8	3906	267.754	355.233	253.782	260.798	317.745	255.868	5.45315	12.1608	0.332821
GLR-DE_DMSO-SB_(11_5)_2020-11-12	12	9	DMSO	0.8	3753	274.243	364.353	251.993	266.155	318.638	252.913	7.70051	15.3477	0.506262
GLR-DE_DMSO-SB_(11_5)_2020-11-12	12	10	DMSO	0.8	4115	268.939	359.214	254.394	262.646	316.938	256.89	5.85662	13.1956	0.218712
GLR-DE_DMSO-SB_(11_5)_2020-11-12	12	11	DMSO	0.8	3623	273.074	352.982	254.284	264.383	316.357	255.821	7.45239	11.841	0.607232
GLR-DE_DMSO-SB_(11_5)_2020-11-12	13	4	DMSO	0.9	3783	261.508	343.438	250.324	255.319	303.842	252.405	4.54666	10.2035	0.343643
GLR-DE_DMSO-SB_(11_5)_2020-11-12	13	5	DMSO	0.9	3539	265.876	329.885	245.761	256.775	301.813	246.502	6.69681	8.75954	0.932467
GLR-DE_DMSO-SB_(11_5)_2020-11-12	13	6	DMSO	0.9	3662	257.902	333.512	246.183	249.547	300.375	247.89	5.43419	7.83725	0.54615
GLR-DE_DMSO-SB_(11_5)_2020-11-12	13	7	DMSO	0.9	3608	260.947	336.539	249.73	253.851	308.038	251.297	4.9612	9.45122	0.388027
GLR-DE_DMSO-SB_(11_5)_2020-11-12	13	8	DMSO	0.9	4033	260.08	332.383	250.597	255.833	308.714	255.091	3.66972	7.66179	0.148773
GLR-DE_DMSO-SB_(11_5)_2020-11-12	13	9	DMSO	0.9	3675	267.017	332.277	254.871	265.004	307.982	258.125	4.70748	7.37415	0.380952
GLR-DE_DMSO-SB_(11_5)_2020-11-12	13	10	DMSO	0.9	3414	269.201	322.419	254.425	263.417	305.43	256.017	6.00469	5.77036	0.615114
GLR-DE_DMSO-SB_(11_5)_2020-11-12	13	11	DMSO	0.9	3658	270.22	332.68	269.32	260.726	308.454	256.959	7.57244	7.27173	1.06616
GLR-DE_DMSO-SB_(11_5)_2020-11-12	14	4	DMSO	1	4045	256.707	322.171	244.603	251.86	296.184	247.547	3.98022	7.19407	0.173053
GLR-DE_DMSO-SB_(11_5)_2020-11-12	14	5	DMSO	1	4020	266.169	326.79	253.239	260.643	306.443	255.746	5.29851	6.44279	0.348259
GLR-DE_DMSO-SB_(11_5)_2020-11-12	14	6	DMSO	1	3644	261.511	326.191	251.715	256.033	305.428	253.661	4.55543	6.4764	0.411636
GLR-DE_DMSO-SB_(11_5)_2020-11-12	14	7	DMSO	1	3678	263.867	326.809	254.317	260.305	307.418	256.553	3.75204	6.71561	0.462208
GLR-DE_DMSO-SB_(11_5)_2020-11-12	14	8	DMSO	1	3814	265.168	319.989	251.728	261.034	304.341	253.453	4.77189	4.87677	0.31463
GLR-DE_DMSO-SB_(11_5)_2020-11-12	14	9	DMSO	1	3882	266.434	323.53	252.189	262.85	307.361	255.622	4.32767	5.66718	0.489438
GLR-DE_DMSO-SB_(11_5)_2020-11-12	14	10	DMSO	1	3642	263.603	324.413	251.618	260.07	305.735	253.883	3.98133	6.09555	0.302032
GLR-DE_DMSO-SB_(11_5)_2020-11-12	14	11	DMSO	1	3394	267.797	325.034	255.303	260.479	303.825	255.511	5.92222	6.15793	1.14909
GLR-DE_DMSO-SB_(11_5)_2020-11-13	3	4	DMSO	0	3037	347.085	764.829	255.981	318.179	706.893	257.171	32.8943	60.7507	1.05367
GLR-DE_DMSO-SB_(11_5)_2020-11-13	3	5	DMSO	0	3635	341.443	701.217	254.357	312.607	659.649	256.832	30.0963	61.8707	0.522696
GLR-DE_DMSO-SB_(11_5)_2020-11-13	3	6	DMSO	0	2825	340.551	814.12	260.078	310.253	729.222	261.608	30.2655	62.1593	1.13274
GLR-DE_DMSO-SB_(11_5)_2020-11-13	3	7	DMSO	0	3122	338.92	769.859	263.38	309.611	741.058	265.662	28.2832	66.1755	0.480461
GLR-DE_DMSO-SB_(11_5)_2020-11-13	3	8	DMSO	0	2697	335.94	779.774	264.2	310.206	681.881	264.267	28.9952	57.9904	0.964034
GLR-DE_DMSO-SB_(11_5)_2020-11-13	3	9	DMSO	0	3764	349.07	685.066	264.358	319.907	627.926	268.632	32.9968	58.7141	0.239107
GLR-DE_DMSO-SB_(11_5)_2020-11-13	3	10	DMSO	0	3208	343.714	679.49	261.904	317.255	608.677	265.098	31.3591	56.8267	0.654613
GLR-DE_DMSO-SB_(11_5)_2020-11-13	3	11	DMSO	0	3035	346.06	650.378	264.104	320.049	570.32	266.357	32.4876	54.9918	0.62603
GLR-DE_DMSO-SB_(11_5)_2020-11-13	4	4	DMSO	0.05	2817	331.8	724.809	252.975	299.802	630.176	251.589	26.6241	57.8985	1.27796
GLR-DE_DMSO-SB_(11_5)_2020-11-13	4	5	DMSO	0.05	3477	326.701	872.733	252.671	295.174	802.322	252.363	25.0791	63.0429	0.949094
GLR-DE_DMSO-SB_(11_5)_2020-11-13	4	6	DMSO	0.05	3055	334.311	627.556	258.14	305.836	547.542	259.276	27.8887	52.9624	0.752864
GLR-DE_DMSO-SB_(11_5)_2020-11-13	4	7	DMSO	0.05	2107	310.909	630.283	254.215	284.79	481.439	254.96	20.4082	49.0745	0.996678
GLR-DE_DMSO-SB_(11_5)_2020-11-13	4	8	DMSO	0.05	2548	326.568	648.099	262.705	295.42	563.587	260.349	22.6845	55.2983	1.96232
GLR-DE_DMSO-SB_(11_5)_2020-11-13	4	9	DMSO	0.05	2057	318.381	670.269	255.161	290.941	535.769	255.731	23.2863	52.0661	0.875061
GLR-DE_DMSO-SB_(11_5)_2020-11-13	4	10	DMSO	0.05	2787	319.927	647.527	261.833	295.31	547.974	262.242	22.2461	52.8166	1.00466
GLR-DE_DMSO-SB_(11_5)_2020-11-13	4	11	DMSO	0.05	2689	325.846	692.838	263.038	302.504	631.444	265.599	24.5444	58.4604	0.706582
GLR-DE_DMSO-SB_(11_5)_2020-11-13	5	4	DMSO	0.1	2646	326.977	815.721	252.986	299.737	614.447	254.239	27.5132	54.0816	0.642479
GLR-DE_DMSO-SB_(11_5)_2020-11-13	5	5	DMSO	0.1	2895	315.28	828.201	257.626	292.943	763.961	258	19.8964	63.4542	1.03627
GLR-DE_DMSO-SB_(11_5)_2020-11-13	5	6	DMSO	0.1	2956	317.897	653.561	257.58	292.25	550.009	258.57	20.9405	54.6008	0.372124
GLR-DE_DMSO-SB_(11_5)_2020-11-13	5	7	DMSO	0.1	2230	325.211	609.567	258.465	302.536	488.171	261.043	25.426	49.3274	0.538117
GLR-DE_DMSO-SB_(11_5)_2020-11-13	5	8	DMSO	0.1	2894	313.903	618.629	257.668	289.173	536.737	258.423	20.1451	52.6607	0.691085
GLR-DE_DMSO-SB_(11_5)_2020-11-13	5	9	DMSO	0.1	2875	317.003	598.395	266.897	293.978	544.614	269.75	19.6522	54.3304	0.834783
GLR-DE_DMSO-SB_(11_5)_2020-11-13	5	10	DMSO	0.1	2412	317.03	609.221	265.858	294.032	502.423	265.391	20.2736	50.0415	1.24378
GLR-DE_DMSO-SB_(11_5)_2020-11-13	5	11	DMSO	0.1	2376	322.896	620.509	265.318	294.287	513.567	268.111	22.4747	51.0522	0.841751
GLR-DE_DMSO-SB_(11_5)_2020-11-13	6	4	DMSO	0.2	2897	315.728	633.678	251.531	293.088	545.425	254.43	20.5385	53.0549	0.517777
GLR-DE_DMSO-SB_(11_5)_2020-11-13	6	5	DMSO	0.2	2110	319.737	518.042	251.109	288.791	365.991	249.268	23.1754	38.3412	1.46919
GLR-DE_DMSO-SB_(11_5)_2020-11-13	6	6	DMSO	0.2	3210	302.356	578.366	257.309	285.372	484.213	258.072	15.0156	48.3489	0.747664
GLR-DE_DMSO-SB_(11_5)_2020-11-13	6	7	DMSO	0.2	2750	304.202	570.004	264.612	286.477	486.656	266.072	15.3091	48.2909	0.945455
GLR-DE_DMSO-SB_(11_5)_2020-11-13	6	8	DMSO	0.2	2668	310.011	580.308	258.87	288.81	470.339	261.149	18.2159	47.2264	1.08696
GLR-DE_DMSO-SB_(11_5)_2020-11-13	6	9	DMSO	0.2	2329	321.687	639.647	262.007	292.986	530.148	262.89	23.1859	52.1254	1.20223
GLR-DE_DMSO-SB_(11_5)_2020-11-13	6	10	DMSO	0.2	2401	312.621	529.847	259.685	289.614	386.909	263.569	19.0337	40.6497	0.58309
GLR-DE_DMSO-SB_(11_5)_2020-11-13	6	11	DMSO	0.2	2768	316.25	598.392	270.667	297.678	505.483	272.466	19.2197	50.1806	0.578035
GLR-DE_DMSO-SB_(11_5)_2020-11-13	7	4	DMSO	0.3	2874	308.621	637.11	251.01	280.956	448.959	250.221	17.7801	46.4509	1.35699
GLR-DE_DMSO-SB_(11_5)_2020-11-13	7	5	DMSO	0.3	2971	315.927	622.477	257.05	288.295	478.941	256.196	20.6664	48.4685	1.04342
GLR-DE_DMSO-SB_(11_5)_2020-11-13	7	6	DMSO	0.3	2200	305.374	641.828	257.46	282.06	440.897	257.623	16.7727	45.9545	1.22727
GLR-DE_DMSO-SB_(11_5)_2020-11-13	7	7	DMSO	0.3	2558	291.421	696.059	258.19	274.251	603.726	259.031	11.1415	56.8022	0.820954
GLR-DE_DMSO-SB_(11_5)_2020-11-13	7	8	DMSO	0.3	2529	307.87	582.053	259.196	287.539	451.468	258.789	18.2681	45.3539	1.02807
GLR-DE_DMSO-SB_(11_5)_2020-11-13	7	9	DMSO	0.3	2778	306.534	528.976	422.64	280.897	396.394	276.399	17.1706	40.2448	21.7783
GLR-DE_DMSO-SB_(11_5)_2020-11-13	7	10	DMSO	0.3	2376	316.399	677.633	268.418	291.055	508.853	264.751	19.0236	50.5892	3.0303
GLR-DE_DMSO-SB_(11_5)_2020-11-13	7	11	DMSO	0.3	2481	308.881	552.17	263.176	292.656	427.281	265.062	17.6542	43.289	0.685208
GLR-DE_DMSO-SB_(11_5)_2020-11-13	8	4	DMSO	0.4	3091	303.523	575.986	254.11	284.124	429.003	252.45	14.6878	43.9987	1.06762
GLR-DE_DMSO-SB_(11_5)_2020-11-13	8	5	DMSO	0.4	2044	290.394	703.835	262.235	274.118	549.035	260.095	10.3718	53.4247	1.36986
GLR-DE_DMSO-SB_(11_5)_2020-11-13	8	6	DMSO	0.4	2502	295.088	521.7	257.65	273.875	389.388	255.242	12.9496	38.2494	2.47802
GLR-DE_DMSO-SB_(11_5)_2020-11-13	8	7	DMSO	0.4	2801	280.24	588.888	248.582	263.361	441.526	248.602	9.74652	45.2695	0.749732
GLR-DE_DMSO-SB_(11_5)_2020-11-13	8	8	DMSO	0.4	1904	300.982	623.958	261.239	278.998	459.515	262.775	15.9139	46.6387	0.945378
GLR-DE_DMSO-SB_(11_5)_2020-11-13	8	9	DMSO	0.4	2822	290.444	732.999	262.187	275.356	518.338	263.604	11.0206	50.9922	0.956768
GLR-DE_DMSO-SB_(11_5)_2020-11-13	8	10	DMSO	0.4	2460	306.972	497.982	265.715	289.029	364.853	267.15	16.7886	34.6748	0.731707
GLR-DE_DMSO-SB_(11_5)_2020-11-13	8	11	DMSO	0.4	2988	297.793	700.368	259.984	279.557	486.765	260.81	13.6546	49.1299	0.535475
GLR-DE_DMSO-SB_(11_5)_2020-11-13	9	4	DMSO	0.5	2529	295.539	495.133	248.566	271.426	357.499	247.326	14.7885	33.9265	1.10716
GLR-DE_DMSO-SB_(11_5)_2020-11-13	9	5	DMSO	0.5	2683	298.801	489.607	256.264	281.968	367.689	257.243	13.0451	33.6936	0.670891
GLR-DE_DMSO-SB_(11_5)_2020-11-13	9	6	DMSO	0.5	2955	288.452	464.049	253.976	275.38	366.213	256.203	10.1523	32.555	0.439932
GLR-DE_DMSO-SB_(11_5)_2020-11-13	9	7	DMSO	0.5	2398	303.948	460.817	264.801	281.956	366.364	262.971	14.9708	29.5663	2.16847
GLR-DE_DMSO-SB_(11_5)_2020-11-13	9	8	DMSO	0.5	2293	277.627	524.54	353.153	265.553	376.8	254.03	7.19581	37.6363	1.09027
GLR-DE_DMSO-SB_(11_5)_2020-11-13	9	9	DMSO	0.5	2689	293.139	507.24	265.193	281.103	385.662	267.333	11.64	37.1885	0.557828
GLR-DE_DMSO-SB_(11_5)_2020-11-13	9	10	DMSO	0.5	2441	295.03	496.484	260.916	273.298	355.698	257.818	13.4781	32.6096	1.26997
GLR-DE_DMSO-SB_(11_5)_2020-11-13	9	11	DMSO	0.5	2756	298.353	558.889	265.372	277.125	416.137	264.829	12.8447	40.8563	1.34253
GLR-DE_DMSO-SB_(11_5)_2020-11-13	10	4	DMSO	0.6	2299	295.46	410.527	255.036	273.403	338.389	249.803	12.4837	22.1836	2.30535
GLR-DE_DMSO-SB_(11_5)_2020-11-13	10	5	DMSO	0.6	2480	296.036	409.395	256.627	276.342	332.473	254.648	11.8548	19.5968	1.29032
GLR-DE_DMSO-SB_(11_5)_2020-11-13	10	6	DMSO	0.6	3121	287.212	445.649	260.855	274.447	358.098	261.903	9.13169	28.6447	1.15348
GLR-DE_DMSO-SB_(11_5)_2020-11-13	10	7	DMSO	0.6	2862	294.722	395.186	257.946	274.3	333.739	256.369	11.5653	18.2041	1.25786
GLR-DE_DMSO-SB_(11_5)_2020-11-13	10	8	DMSO	0.6	2194	282.258	460.499	254.637	265.385	335.928	252.776	9.52598	25.6153	1.09389
GLR-DE_DMSO-SB_(11_5)_2020-11-13	10	9	DMSO	0.6	2700	293.036	433.958	261.61	276.642	345.668	259.779	11.4444	25.4074	1.22222
GLR-DE_DMSO-SB_(11_5)_2020-11-13	10	10	DMSO	0.6	2714	295.268	428.612	261.645	279.629	344.858	261.065	11.4591	25.5711	1.25276
GLR-DE_DMSO-SB_(11_5)_2020-11-13	10	11	DMSO	0.6	2404	302.009	501.895	263.575	278.853	370.408	261.767	14.6423	33.9434	1.66389
GLR-DE_DMSO-SB_(11_5)_2020-11-13	11	4	DMSO	0.7	2966	292.81	438.649	258.384	267.632	329.445	255.214	11.8004	23.0614	2.49494
GLR-DE_DMSO-SB_(11_5)_2020-11-13	11	5	DMSO	0.7	1917	292.376	388.359	259.461	274.871	332.518	259.745	11.2154	16.6927	1.09546
GLR-DE_DMSO-SB_(11_5)_2020-11-13	11	6	DMSO	0.7	2615	285.901	409.945	266.294	269.206	336.211	257.47	10.2103	20.7648	2.10325
GLR-DE_DMSO-SB_(11_5)_2020-11-13	11	7	DMSO	0.7	2260	278.455	415.007	257.422	263.675	333.08	256.44	7.87611	20.7965	1.32743
GLR-DE_DMSO-SB_(11_5)_2020-11-13	11	8	DMSO	0.7	1973	297.297	392.963	266.007	273.775	337.63	261.181	13.5327	17.7902	3.34516
GLR-DE_DMSO-SB_(11_5)_2020-11-13	11	9	DMSO	0.7	1961	288.069	385.295	260.693	269.644	326.477	261.935	12.1877	14.8904	1.07088
GLR-DE_DMSO-SB_(11_5)_2020-11-13	11	10	DMSO	0.7	2589	277.264	397.439	261.977	266.268	330.23	263.747	7.41599	17.7675	0.811124
GLR-DE_DMSO-SB_(11_5)_2020-11-13	11	11	DMSO	0.7	2080	277.679	393.499	259.591	260.165	328.007	260.06	8.89423	17.0673	1.25
GLR-DE_DMSO-SB_(11_5)_2020-11-13	12	4	DMSO	0.8	1981	282.07	361.499	252.991	262.577	313.369	248.825	10.5502	10.7017	2.4735
GLR-DE_DMSO-SB_(11_5)_2020-11-13	12	5	DMSO	0.8	2325	278.802	384.747	251.906	262.582	322.337	250.522	8.60215	16.043	1.33333
GLR-DE_DMSO-SB_(11_5)_2020-11-13	12	6	DMSO	0.8	2269	272.225	355.695	250.566	261.895	317.32	250.057	7.27193	10.4892	1.18995
GLR-DE_DMSO-SB_(11_5)_2020-11-13	12	7	DMSO	0.8	2470	279.533	364.383	259.992	262.444	321.456	257.159	9.59514	12.753	2.18623
GLR-DE_DMSO-SB_(11_5)_2020-11-13	12	8	DMSO	0.8	2205	273.974	391.56	252.995	261.259	317.976	252.52	5.98639	15.6463	0.907029
GLR-DE_DMSO-SB_(11_5)_2020-11-13	12	9	DMSO	0.8	2064	281.777	373.809	256.383	268.295	325.116	255.011	8.38178	14.1473	1.55039
GLR-DE_DMSO-SB_(11_5)_2020-11-13	12	10	DMSO	0.8	2545	280.076	374.798	257.275	268.138	325.137	256.462	8.01572	13.6739	1.29666
GLR-DE_DMSO-SB_(11_5)_2020-11-13	12	11	DMSO	0.8	1991	283.674	391.884	267.702	269.379	333.237	266.458	8.4882	16.5244	1.50678
GLR-DE_DMSO-SB_(11_5)_2020-11-13	13	4	DMSO	0.9	2576	280.758	363.039	258.941	267.163	321.635	257.197	8.19099	11.9953	1.97981
GLR-DE_DMSO-SB_(11_5)_2020-11-13	13	5	DMSO	0.9	2619	278.6	375.379	255.218	259.466	318.436	250.854	9.50745	12.7148	2.67278
GLR-DE_DMSO-SB_(11_5)_2020-11-13	13	6	DMSO	0.9	1858	262.501	343.216	245.589	248.605	303.167	243.287	5.92034	10.0108	1.56082
GLR-DE_DMSO-SB_(11_5)_2020-11-13	13	7	DMSO	0.9	2571	284.85	357.958	262.524	270.418	319.849	261.678	8.79035	10.6962	2.29483
GLR-DE_DMSO-SB_(11_5)_2020-11-13	13	8	DMSO	0.9	3143	273.043	376.354	257.263	260.58	322.476	256.59	6.39516	14.3812	1.24085
GLR-DE_DMSO-SB_(11_5)_2020-11-13	13	9	DMSO	0.9	1796	264.811	353.397	253.012	256.898	317.528	253.502	4.62138	9.35412	0.946548
GLR-DE_DMSO-SB_(11_5)_2020-11-13	13	10	DMSO	0.9	1995	281.063	364.523	263.079	264.689	317.548	257.325	8.77193	12.0301	3.05764
GLR-DE_DMSO-SB_(11_5)_2020-11-13	13	11	DMSO	0.9	2174	278.58	380.403	258.702	264.969	323.764	256.339	7.77369	13.0635	1.74793
GLR-DE_DMSO-SB_(11_5)_2020-11-13	14	4	DMSO	1	2478	264.346	332.022	249.546	257.338	308.583	250.724	5.1251	5.64972	0.726392
GLR-DE_DMSO-SB_(11_5)_2020-11-13	14	5	DMSO	1	2648	268.43	332.434	255.572	257.025	309.562	254.757	6.91088	5.85347	1.51057
GLR-DE_DMSO-SB_(11_5)_2020-11-13	14	6	DMSO	1	2432	270.302	344.33	263.344	255.804	306.753	255.367	7.44243	8.01809	3.33059
GLR-DE_DMSO-SB_(11_5)_2020-11-13	14	7	DMSO	1	2823	280.44	334.848	263.248	268.847	313.59	261.57	6.90754	5.84485	2.16082
GLR-DE_DMSO-SB_(11_5)_2020-11-13	14	8	DMSO	1	2585	273.77	334.572	256.244	262.757	310.5	254.93	6.53772	6.5764	1.66344
GLR-DE_DMSO-SB_(11_5)_2020-11-13	14	9	DMSO	1	2848	273	339.068	260.832	264.529	314.065	259.709	5.09129	6.8118	1.19382
GLR-DE_DMSO-SB_(11_5)_2020-11-13	14	10	DMSO	1	3011	273.009	333.244	258.476	262.761	314.097	258.472	5.71239	6.14414	0.996347
GLR-DE_DMSO-SB_(11_5)_2020-11-13	14	11	DMSO	1	2249	280.371	338.359	267.791	269.339	320.396	266.55	7.60338	5.60249	1.37839
GLR-DE_DMSO-SB_(11_5)_2020-11-13	3	14	SB431542	0.0045	2545	336.126	588.555	262.929	309.855	513.053	264.118	27.9371	50.7662	1.02161
GLR-DE_DMSO-SB_(11_5)_2020-11-13	3	15	SB431542	0.0045	3076	332.13	734.509	265.421	306.582	712.634	266.668	27.6983	67.0026	1.07282
GLR-DE_DMSO-SB_(11_5)_2020-11-13	3	16	SB431542	0.0045	2845	335.47	689.023	268.275	310.308	640.286	268.75	29.4903	61.2302	1.01933
GLR-DE_DMSO-SB_(11_5)_2020-11-13	3	17	SB431542	0.0045	3722	340.021	724.006	264.783	315.105	697.202	268.505	30.2794	63.8366	0.322407
GLR-DE_DMSO-SB_(11_5)_2020-11-13	3	18	SB431542	0.0045	2883	337.66	630.174	263.725	309.546	588.696	264.478	29.171	58.0298	1.0059
GLR-DE_DMSO-SB_(11_5)_2020-11-13	3	19	SB431542	0.0045	3738	335.194	699.66	263.881	311.518	660.888	266.663	28.7854	61.8245	0.34778
GLR-DE_DMSO-SB_(11_5)_2020-11-13	3	20	SB431542	0.0045	3403	350.396	602.86	262.15	321.073	548.998	264.264	35.3805	54.305	0.852189
GLR-DE_DMSO-SB_(11_5)_2020-11-13	3	21	SB431542	0.0045	3714	342.399	696.947	258.351	316.99	653.68	261.094	31.7178	63.5703	0.592353
GLR-DE_DMSO-SB_(11_5)_2020-11-13	4	14	SB431542	0.01	1814	333.165	581.139	267.877	308.13	473.212	267.67	27.4531	48.2911	1.10254
GLR-DE_DMSO-SB_(11_5)_2020-11-13	4	15	SB431542	0.01	2594	340.423	757.73	270.266	312.437	690.378	271.149	28.9514	62.182	1.23362
GLR-DE_DMSO-SB_(11_5)_2020-11-13	4	16	SB431542	0.01	1877	323.537	527.906	263.727	290.43	441.057	259.979	24.0277	44.5924	2.23761
GLR-DE_DMSO-SB_(11_5)_2020-11-13	4	17	SB431542	0.01	2755	319.697	656.216	264.678	294.852	616.878	265.505	21.3793	58.4392	0.980036
GLR-DE_DMSO-SB_(11_5)_2020-11-13	4	18	SB431542	0.01	2869	315.597	581.32	260.611	293.562	529.644	262.044	20.6344	52.5967	1.08052
GLR-DE_DMSO-SB_(11_5)_2020-11-13	4	19	SB431542	0.01	2435	333.808	600.189	263.863	301.212	519.539	261.655	27.8439	51.4168	2.13552
GLR-DE_DMSO-SB_(11_5)_2020-11-13	4	20	SB431542	0.01	2141	335.306	653.094	261.873	306.796	572.979	259.215	27.8375	55.5815	2.14853
GLR-DE_DMSO-SB_(11_5)_2020-11-13	4	21	SB431542	0.01	3032	329.634	619.056	261.001	304.399	524.166	260.935	28.0673	51.814	0.989446
GLR-DE_DMSO-SB_(11_5)_2020-11-13	5	14	SB431542	0.021	2367	328.043	577.74	265.726	301.019	492.743	267.584	24.3346	49.0917	1.14068
GLR-DE_DMSO-SB_(11_5)_2020-11-13	5	15	SB431542	0.021	2173	336.951	636.909	266.818	310.802	532.329	267.903	28.0258	52.5541	0.736309
GLR-DE_DMSO-SB_(11_5)_2020-11-13	5	16	SB431542	0.021	2039	336.527	586.115	262.357	307.744	475.175	262.534	27.9058	47.9647	1.27513
GLR-DE_DMSO-SB_(11_5)_2020-11-13	5	17	SB431542	0.021	2482	330.828	666.153	269.724	307.728	612.986	270.695	26.0274	58.8235	1.08783
GLR-DE_DMSO-SB_(11_5)_2020-11-13	5	18	SB431542	0.021	2366	333.736	643.344	262.997	306.665	540.292	262.958	27.8529	52.9163	1.85968
GLR-DE_DMSO-SB_(11_5)_2020-11-13	5	19	SB431542	0.021	2253	327.746	633.193	276.059	300.203	535.91	266.231	25.344	52.7741	4.2166
GLR-DE_DMSO-SB_(11_5)_2020-11-13	5	20	SB431542	0.021	2623	312.809	624.516	255.957	288.214	555.494	257.766	19.329	53.7171	0.724361
GLR-DE_DMSO-SB_(11_5)_2020-11-13	5	21	SB431542	0.021	3028	341.131	631.128	256.797	317.455	573.211	258.7	31.4399	54.7226	0.594452
GLR-DE_DMSO-SB_(11_5)_2020-11-13	6	14	SB431542	0.046	3553	338.726	687.269	272.267	315.334	655.551	275.628	29.1303	61.2159	1.06952
GLR-DE_DMSO-SB_(11_5)_2020-11-13	6	15	SB431542	0.046	1579	339.511	704.765	274.514	308.826	572.408	273.628	30.8423	55.0982	2.0266
GLR-DE_DMSO-SB_(11_5)_2020-11-13	6	16	SB431542	0.046	2028	337.1	656.917	268.322	311.649	535.149	267.344	28.9941	52.1203	1.42998
GLR-DE_DMSO-SB_(11_5)_2020-11-13	6	17	SB431542	0.046	2334	343.635	584.509	267.194	309.605	469.883	266.505	30.3342	47.9006	1.79949
GLR-DE_DMSO-SB_(11_5)_2020-11-13	6	18	SB431542	0.046	2522	337.389	628.412	258.308	308.243	539.943	260.134	29.778	52.9738	0.872324
GLR-DE_DMSO-SB_(11_5)_2020-11-13	6	19	SB431542	0.046	1881	330.88	547.992	271.524	304.247	460.565	269.461	26.2626	44.8697	2.605
GLR-DE_DMSO-SB_(11_5)_2020-11-13	6	20	SB431542	0.046	2330	339.597	551.731	263.996	309.196	488.488	264.952	29.9142	48.7124	1.20172
GLR-DE_DMSO-SB_(11_5)_2020-11-13	6	21	SB431542	0.046	2344	336.063	587.441	269.524	307.057	517.529	265.122	29.5648	51.5785	3.24232
GLR-DE_DMSO-SB_(11_5)_2020-11-13	7	14	SB431542	0.098	2495	355.613	562.89	269.849	321.508	407.278	270.942	35.7114	42.7254	1.32265
GLR-DE_DMSO-SB_(11_5)_2020-11-13	7	15	SB431542	0.098	2584	352.691	571.328	266.396	318.125	444.281	266.683	32.3916	44.969	1.31579
GLR-DE_DMSO-SB_(11_5)_2020-11-13	7	16	SB431542	0.098	3088	345.152	598.183	268.114	313.198	501.022	270.402	30.9262	49.9028	0.582902
GLR-DE_DMSO-SB_(11_5)_2020-11-13	7	17	SB431542	0.098	2984	340.222	686.243	265.177	314.494	617.889	265.532	29.5241	58.1769	1.27346
GLR-DE_DMSO-SB_(11_5)_2020-11-13	7	18	SB431542	0.098	2274	326.999	553.399	264.862	299.359	472.31	261.495	25.3298	47.0097	2.24274
GLR-DE_DMSO-SB_(11_5)_2020-11-13	7	19	SB431542	0.098	1958	327.767	562.163	264.237	300.241	447.955	262.152	25.5873	45.097	2.0429
GLR-DE_DMSO-SB_(11_5)_2020-11-13	7	20	SB431542	0.098	2085	324.819	612.732	262.969	295.302	518.799	261.258	24.1727	51.3669	2.01439
GLR-DE_DMSO-SB_(11_5)_2020-11-13	7	21	SB431542	0.098	3037	341.675	552.095	255.982	310.052	381.203	256.983	31.7748	41.159	1.05367
GLR-DE_DMSO-SB_(11_5)_2020-11-13	8	14	SB431542	0.21	2771	341.944	549.235	273.724	311.957	411.321	275.053	29.9892	43.1252	0.974377
GLR-DE_DMSO-SB_(11_5)_2020-11-13	8	15	SB431542	0.21	2835	347.073	567.711	268.539	313.479	399.553	269.637	33.3333	42.6808	1.0582
GLR-DE_DMSO-SB_(11_5)_2020-11-13	8	16	SB431542	0.21	2013	352.458	531.434	278.628	320.981	393.761	279.842	33.8798	41.4307	1.14257
GLR-DE_DMSO-SB_(11_5)_2020-11-13	8	17	SB431542	0.21	1913	344.849	522.674	275.696	312.896	403.397	272.413	31.6257	40.9827	3.29326
GLR-DE_DMSO-SB_(11_5)_2020-11-13	8	18	SB431542	0.21	2171	339.095	517.821	270.918	304.551	391.905	270.146	28.7425	39.7973	1.84247
GLR-DE_DMSO-SB_(11_5)_2020-11-13	8	19	SB431542	0.21	2046	337.339	457.535	267.143	301.563	341.252	267.699	28.5924	30.303	1.90616
GLR-DE_DMSO-SB_(11_5)_2020-11-13	8	20	SB431542	0.21	2476	327.369	503.427	273.463	299.567	384.353	269.778	23.6268	38.2876	2.38288
GLR-DE_DMSO-SB_(11_5)_2020-11-13	8	21	SB431542	0.21	2607	333.91	507.626	270.953	303.142	393.658	266.567	28.1933	39.4323	2.68508
GLR-DE_DMSO-SB_(11_5)_2020-11-13	9	14	SB431542	0.46	1708	331.194	407.034	283.234	299.19	336.988	280.39	25.8197	19.6136	2.51756
GLR-DE_DMSO-SB_(11_5)_2020-11-13	9	15	SB431542	0.46	3040	358.327	421.022	282.045	322.303	339.327	282.177	35.8553	22.6974	1.67763
GLR-DE_DMSO-SB_(11_5)_2020-11-13	9	16	SB431542	0.46	3154	335.312	420.625	281.991	304.055	335.039	282.409	27.9011	23.3672	1.61699
GLR-DE_DMSO-SB_(11_5)_2020-11-13	9	17	SB431542	0.46	3131	348.882	424.478	279.838	316.607	332.337	278.8	34.0147	23.0917	1.75663
GLR-DE_DMSO-SB_(11_5)_2020-11-13	9	18	SB431542	0.46	1680	339.25	425.822	285.264	305.833	335.335	281.247	29.5833	24.0476	3.27381
GLR-DE_DMSO-SB_(11_5)_2020-11-13	9	19	SB431542	0.46	1970	330.963	386.507	272.195	298.087	320.289	267.026	26.8528	17.6142	2.63959
GLR-DE_DMSO-SB_(11_5)_2020-11-13	9	20	SB431542	0.46	2846	329.313	405.072	273.412	295.752	327.435	272.466	26.3528	20.4498	2.00281
GLR-DE_DMSO-SB_(11_5)_2020-11-13	9	21	SB431542	0.46	2159	338.848	398.899	278.602	306.937	327.053	276.574	29.3654	18.6197	2.73275
GLR-DE_DMSO-SB_(11_5)_2020-11-13	10	14	SB431542	0.99	1986	347.92	325.358	305.221	311.365	316.298	301.147	32.5277	2.9708	5.0856
GLR-DE_DMSO-SB_(11_5)_2020-11-13	10	15	SB431542	0.99	2492	340.904	335.855	299.703	307.168	316.7	296.689	29.6148	4.81541	2.88925
GLR-DE_DMSO-SB_(11_5)_2020-11-13	10	16	SB431542	0.99	2104	319.308	324.464	296.72	285.788	313.017	294.45	23.4791	3.37452	2.94677
GLR-DE_DMSO-SB_(11_5)_2020-11-13	10	17	SB431542	0.99	2048	334.257	333.134	310.181	306.55	315.971	304.277	26.9043	4.98047	4.29687
GLR-DE_DMSO-SB_(11_5)_2020-11-13	10	18	SB431542	0.99	1719	320.399	332.067	291.315	279.54	312.89	286.446	24.4328	4.65387	4.363
GLR-DE_DMSO-SB_(11_5)_2020-11-13	10	19	SB431542	0.99	2216	318.842	319.896	295.162	284.275	304.024	288.738	21.5253	4.06137	3.88087
GLR-DE_DMSO-SB_(11_5)_2020-11-13	10	20	SB431542	0.99	1891	321.331	317.606	297.897	276.813	305.708	292.552	22.4749	3.22581	3.86039
GLR-DE_DMSO-SB_(11_5)_2020-11-13	10	21	SB431542	0.99	1887	315.389	316.22	299.316	282.215	300.649	290.018	21.3566	4.02756	4.18654
GLR-DE_DMSO-SB_(11_5)_2020-11-13	11	14	SB431542	2.14	2190	320.922	315.937	334.244	282.96	314.501	327.337	23.3333	1.00457	5.93607
GLR-DE_DMSO-SB_(11_5)_2020-11-13	11	15	SB431542	2.14	1978	307.282	313.148	322.936	279.788	311.408	318.868	15.4196	0.707786	4.29727
GLR-DE_DMSO-SB_(11_5)_2020-11-13	11	16	SB431542	2.14	1713	308.283	312.64	337.881	282.339	308.72	330.383	18.5055	1.10917	6.77175
GLR-DE_DMSO-SB_(11_5)_2020-11-13	11	17	SB431542	2.14	1623	319.94	315.188	343.695	282.218	309.244	332.031	20.2711	1.66359	8.87246
GLR-DE_DMSO-SB_(11_5)_2020-11-13	11	18	SB431542	2.14	2156	304.832	311.997	334.031	278.643	311.14	329.012	17.3469	0.695733	6.44712
GLR-DE_DMSO-SB_(11_5)_2020-11-13	11	19	SB431542	2.14	1894	319.993	312.979	335.546	283.26	307.969	327.829	20.3801	1.42555	6.01901
GLR-DE_DMSO-SB_(11_5)_2020-11-13	11	20	SB431542	2.14	1374	325.967	309.557	331.815	279.195	299.964	314.646	25.4003	2.54731	9.53421
GLR-DE_DMSO-SB_(11_5)_2020-11-13	11	21	SB431542	2.14	1939	293.554	305.263	324.3	266.188	303.247	318.64	12.9448	0.876741	5.41516
GLR-DE_DMSO-SB_(11_5)_2020-11-13	12	14	SB431542	4.63	1916	312.63	323.772	418.839	284.531	318.342	400.904	17.119	1.3048	41.9102
GLR-DE_DMSO-SB_(11_5)_2020-11-13	12	15	SB431542	4.63	1369	323.916	334.88	420.43	290.51	328.024	397.491	23.5939	3.06793	39.2988
GLR-DE_DMSO-SB_(11_5)_2020-11-13	12	16	SB431542	4.63	1290	314.25	325.56	425.55	280.74	316.584	399.141	19.2248	1.47287	40.6202
GLR-DE_DMSO-SB_(11_5)_2020-11-13	12	17	SB431542	4.63	1256	299.434	313.927	372.469	271.925	311.413	365.644	15.8439	1.11465	17.0382
GLR-DE_DMSO-SB_(11_5)_2020-11-13	12	18	SB431542	4.63	1297	311.633	319.162	370.566	276.4	316.246	361.017	17.0393	1.07941	21.7425
GLR-DE_DMSO-SB_(11_5)_2020-11-13	12	19	SB431542	4.63	1693	303.642	315.202	399.852	274.751	310.421	384.462	14.8848	1.83107	29.3562
GLR-DE_DMSO-SB_(11_5)_2020-11-13	12	20	SB431542	4.63	1170	337.278	331.787	433.507	302.072	330.962	420.846	26.2393	1.79487	50.8547
GLR-DE_DMSO-SB_(11_5)_2020-11-13	12	21	SB431542	4.63	1553	306.2	316.32	410.117	271.033	307.049	383.621	17.7077	2.18931	32.3245
GLR-DE_DMSO-SB_(11_5)_2020-11-13	13	14	SB431542	10	1399	325.717	342.643	572.984	292.974	337.642	552.763	23.5883	2.07291	87.8485
GLR-DE_DMSO-SB_(11_5)_2020-11-13	13	15	SB431542	10	890	311.278	333.421	514.435	288	328.504	496.656	17.6404	0.898876	80.2247
GLR-DE_DMSO-SB_(11_5)_2020-11-13	13	16	SB431542	10	846	337.196	344.295	596.269	306.532	335.741	560.363	26.2411	2.00946	90.1891
GLR-DE_DMSO-SB_(11_5)_2020-11-13	13	17	SB431542	10	1028	323.031	338.667	548.779	288.19	334.636	521.921	24.1245	1.94553	81.4202
GLR-DE_DMSO-SB_(11_5)_2020-11-13	13	18	SB431542	10	640	305.942	324.757	510.002	275.69	317.866	489.606	16.7187	1.25	77.3437
GLR-DE_DMSO-SB_(11_5)_2020-11-13	13	19	SB431542	10	1201	350.853	342.504	528.53	305.692	341.828	510.21	30.2248	1.41549	81.6819
GLR-DE_DMSO-SB_(11_5)_2020-11-13	13	20	SB431542	10	935	372.853	387.135	490.821	341.315	364.697	490.977	40.7487	9.94652	66.8449
GLR-DE_DMSO-SB_(11_5)_2020-11-13	13	21	SB431542	10	1669	311.384	322.63	478.061	282.523	317.937	452.867	20.3715	1.25824	66.3271
GLR-DE_DMSO-SB_(11_5)_2020-11-13	14	14	SB431542	5	1597	282.541	313.573	398.451	260.612	311.268	385.762	11.3338	0.626174	33.1872
GLR-DE_DMSO-SB_(11_5)_2020-11-13	14	15	SB431542	5	1193	296.306	313.924	367.375	267.588	308.069	351.41	14.5013	1.08969	18.4409
GLR-DE_DMSO-SB_(11_5)_2020-11-13	14	16	SB431542	5	1195	299.128	324.76	471.986	270.131	317.992	446.703	15.6485	1.75732	63.1799
GLR-DE_DMSO-SB_(11_5)_2020-11-13	14	17	SB431542	5	1245	308.653	322.621	414.583	279.045	313.646	390.138	17.1888	1.44578	37.6707
GLR-DE_DMSO-SB_(11_5)_2020-11-13	14	18	SB431542	5	1377	303.833	324.96	463.254	279.218	324.862	452.767	15.6137	0.87146	64.3428
GLR-DE_DMSO-SB_(11_5)_2020-11-13	14	19	SB431542	5	1826	291.414	326.032	437.504	274.704	320.475	421.531	9.69332	0.876232	51.5334
GLR-DE_DMSO-SB_(11_5)_2020-11-13	14	20	SB431542	5	1791	304.015	328.313	468.177	283.439	323.181	453.166	13.512	1.95422	64.7124
GLR-DE_DMSO-SB_(11_5)_2020-11-13	14	21	SB431542	5	1334	303.572	322.017	435.828	270.901	317.434	416.997	16.1919	0.974513	49.1754
GLR-DE_DMSO-SB_(11_6)_2020-11-13_2	3	4	DMSO	0	3522	311.192	811.057	250.829	291.26	786.577	251.204	11.2152	75.4685	0.908575
GLR-DE_DMSO-SB_(11_6)_2020-11-13_2	3	5	DMSO	0	2440	317.692	728.467	259.353	291.209	680.756	255.965	13.9344	64.8361	2.04918
GLR-DE_DMSO-SB_(11_6)_2020-11-13_2	3	6	DMSO	0	1706	312.177	785.32	256.004	284.277	754.081	255.365	13.2474	65.1817	1.93435
GLR-DE_DMSO-SB_(11_6)_2020-11-13_2	3	7	DMSO	0	1936	309.255	691.347	254.034	287.373	670.788	253.921	11.7769	66.8388	1.44628
GLR-DE_DMSO-SB_(11_6)_2020-11-13_2	3	8	DMSO	0	2534	306.294	780.753	259.782	282.012	764.359	259.533	11.1681	69.1002	1.65746
GLR-DE_DMSO-SB_(11_6)_2020-11-13_2	3	9	DMSO	0	2505	316.097	659.707	264.428	292.771	638.174	263.022	12.2156	62.3553	1.75649
GLR-DE_DMSO-SB_(11_6)_2020-11-13_2	3	10	DMSO	0	2509	323.04	786.102	265.933	300.779	762.065	265.953	13.1526	72.0207	1.67397
GLR-DE_DMSO-SB_(11_6)_2020-11-13_2	3	11	DMSO	0	3194	314.058	774.691	265.784	294.416	766.933	267.168	11.052	74.1077	0.751409
GLR-DE_DMSO-SB_(11_6)_2020-11-13_2	4	4	DMSO	0.05	2196	298.129	713.666	247.23	273.231	689.721	244.845	10.4281	65.1184	1.63934
GLR-DE_DMSO-SB_(11_6)_2020-11-13_2	4	5	DMSO	0.05	2438	295.733	766.921	251.781	272.627	756.543	249.649	9.14684	69.6883	1.47662
GLR-DE_DMSO-SB_(11_6)_2020-11-13_2	4	6	DMSO	0.05	2388	301.278	661.22	255.407	278.327	605.465	253.482	10.469	59.8827	1.63317
GLR-DE_DMSO-SB_(11_6)_2020-11-13_2	4	7	DMSO	0.05	2283	291.249	782.577	256.533	272.658	738.328	256.115	7.88436	66.36	1.48927
GLR-DE_DMSO-SB_(11_6)_2020-11-13_2	4	8	DMSO	0.05	2957	299.07	662.15	259.799	281.216	650.289	259.938	8.15015	65.2689	0.676361
GLR-DE_DMSO-SB_(11_6)_2020-11-13_2	4	9	DMSO	0.05	2913	308.264	693.073	261.778	285.206	679.981	263.551	9.9897	64.3666	0.686577
GLR-DE_DMSO-SB_(11_6)_2020-11-13_2	4	10	DMSO	0.05	2565	317.21	685.175	262.876	296.35	642.329	263.931	12.5536	62.3002	1.05263
GLR-DE_DMSO-SB_(11_6)_2020-11-13_2	4	11	DMSO	0.05	3113	304.398	718.822	265.075	285.897	707.738	263.006	9.31577	66.5275	0.963701
GLR-DE_DMSO-SB_(11_6)_2020-11-13_2	5	4	DMSO	0.1	2100	296.161	731.195	240.57	267.5	673.875	240.35	10.6667	63.2381	1.04762
GLR-DE_DMSO-SB_(11_6)_2020-11-13_2	5	5	DMSO	0.1	2319	302.25	730.246	252.563	281.275	675.363	253.182	9.74558	63.605	0.991807
GLR-DE_DMSO-SB_(11_6)_2020-11-13_2	5	6	DMSO	0.1	2299	296.736	644.101	256.49	278.128	589.656	255.673	8.39495	57.6338	1.08743
GLR-DE_DMSO-SB_(11_6)_2020-11-13_2	5	7	DMSO	0.1	1938	305.751	620.647	256.29	278.116	582.11	255.082	11.8163	57.3787	1.28999
GLR-DE_DMSO-SB_(11_6)_2020-11-13_2	5	8	DMSO	0.1	4002	295.806	777.162	255.277	278.683	780.126	258.082	7.67116	72.6387	0.324838
GLR-DE_DMSO-SB_(11_6)_2020-11-13_2	5	9	DMSO	0.1	3532	298.465	736.896	261.12	283.355	728.269	263.176	7.81427	70.923	0.509626
GLR-DE_DMSO-SB_(11_6)_2020-11-13_2	5	10	DMSO	0.1	2239	304.268	613	267.179	286.286	575.705	265.147	10.3171	58.3296	1.65252
GLR-DE_DMSO-SB_(11_6)_2020-11-13_2	5	11	DMSO	0.1	1707	300.523	601.239	260.233	276.634	551.302	256.529	10.6034	54.13	1.75747
GLR-DE_DMSO-SB_(11_6)_2020-11-13_2	6	4	DMSO	0.2	2244	286.496	625.519	247.924	267.769	569.451	248.094	7.30838	57.1747	1.42602
GLR-DE_DMSO-SB_(11_6)_2020-11-13_2	6	5	DMSO	0.2	2070	289.181	663.492	254.466	266.274	588.866	254.858	8.59903	58.3575	1.11111
GLR-DE_DMSO-SB_(11_6)_2020-11-13_2	6	6	DMSO	0.2	2362	295.276	616.688	258.066	272.904	550.798	257.308	8.59441	54.4877	1.65114
GLR-DE_DMSO-SB_(11_6)_2020-11-13_2	6	7	DMSO	0.2	2731	280	623.331	250.821	266.972	586.061	251.084	4.87001	57.9275	1.06188
GLR-DE_DMSO-SB_(11_6)_2020-11-13_2	6	8	DMSO	0.2	2360	288.088	572.016	252.829	268.979	511.102	253.061	7.66949	50.9746	1.10169
GLR-DE_DMSO-SB_(11_6)_2020-11-13_2	6	9	DMSO	0.2	3043	297.643	639.159	256.912	280.598	576.205	258.736	7.68978	56.1945	0.755833
GLR-DE_DMSO-SB_(11_6)_2020-11-13_2	6	10	DMSO	0.2	2842	291.903	656.001	254.955	272.567	607.379	255.855	7.38916	58.0577	0.738916
GLR-DE_DMSO-SB_(11_6)_2020-11-13_2	6	11	DMSO	0.2	3815	294.67	677.142	261.819	281.309	654.724	264.136	5.63565	63.9056	0.498034
GLR-DE_DMSO-SB_(11_6)_2020-11-13_2	7	4	DMSO	0.3	1816	275.879	622.87	242.686	259.16	537.459	242.71	6.22247	53.1938	1.43172
GLR-DE_DMSO-SB_(11_6)_2020-11-13_2	7	5	DMSO	0.3	2316	289.122	551.355	255.714	267.028	483.526	253.516	7.94473	48.1865	1.5544
GLR-DE_DMSO-SB_(11_6)_2020-11-13_2	7	6	DMSO	0.3	2153	282.706	581.524	260.32	264.882	493.598	254.05	7.66372	48.7227	1.85787
GLR-DE_DMSO-SB_(11_6)_2020-11-13_2	7	7	DMSO	0.3	3188	286.058	749.66	256.129	270.882	682.535	257.719	5.86575	63.2371	0.627353
GLR-DE_DMSO-SB_(11_6)_2020-11-13_2	7	8	DMSO	0.3	2970	285.137	584.816	260.185	272.595	520.996	262.043	5.9596	51.8855	0.606061
GLR-DE_DMSO-SB_(11_6)_2020-11-13_2	7	9	DMSO	0.3	4540	295.011	621.261	263.426	282.844	579.198	267.502	5.837	57.6872	0.198238
GLR-DE_DMSO-SB_(11_6)_2020-11-13_2	7	10	DMSO	0.3	2759	301.019	658.417	268.924	283.46	560.678	269.076	8.62631	54.1138	1.4498
GLR-DE_DMSO-SB_(11_6)_2020-11-13_2	7	11	DMSO	0.3	2108	291.706	550.579	259.171	268.074	469.444	256.647	8.58634	46.3947	2.08729
GLR-DE_DMSO-SB_(11_6)_2020-11-13_2	8	4	DMSO	0.4	2325	277.625	529.441	244.779	261.416	432.562	244.355	5.50538	42.4516	0.860215
GLR-DE_DMSO-SB_(11_6)_2020-11-13_2	8	5	DMSO	0.4	2333	268.625	554.21	245.313	258.024	459.244	245.404	4.07201	45.6065	1.02872
GLR-DE_DMSO-SB_(11_6)_2020-11-13_2	8	6	DMSO	0.4	2984	277.636	618.697	255.331	267.265	531.444	255.931	4.18901	52.1448	0.569705
GLR-DE_DMSO-SB_(11_6)_2020-11-13_2	8	7	DMSO	0.4	2706	278.602	653.858	257.062	260.764	487.606	254.137	4.17591	48.9653	0.997783
GLR-DE_DMSO-SB_(11_6)_2020-11-13_2	8	8	DMSO	0.4	2653	276.15	496.906	252.079	261.457	379.145	251.024	5.57859	37.0524	1.05541
GLR-DE_DMSO-SB_(11_6)_2020-11-13_2	8	9	DMSO	0.4	2617	277.356	651.339	259.851	264.449	538.04	261.474	5.08215	52.4647	0.726022
GLR-DE_DMSO-SB_(11_6)_2020-11-13_2	8	10	DMSO	0.4	3473	287.91	598.115	259.279	275.189	539.332	261.481	5.09646	53.4984	0.8926
GLR-DE_DMSO-SB_(11_6)_2020-11-13_2	8	11	DMSO	0.4	4102	283.926	583.734	260.654	273.562	525.159	263.349	4.3881	51.7309	0.268162
GLR-DE_DMSO-SB_(11_6)_2020-11-13_2	9	4	DMSO	0.5	1882	262.84	502.733	248.415	254.28	391.455	250.351	3.02869	36.0255	0.690754
GLR-DE_DMSO-SB_(11_6)_2020-11-13_2	9	5	DMSO	0.5	2964	275.805	526.351	249.386	264.779	433.53	249.999	3.94737	42.6451	1.01215
GLR-DE_DMSO-SB_(11_6)_2020-11-13_2	9	6	DMSO	0.5	3381	282.079	516.356	256.811	270.324	433.674	257.162	4.6436	41.0825	1.12393
GLR-DE_DMSO-SB_(11_6)_2020-11-13_2	9	7	DMSO	0.5	2895	277.435	444.76	250.979	262.56	360.627	249.653	4.93955	29.1537	1.1399
GLR-DE_DMSO-SB_(11_6)_2020-11-13_2	9	8	DMSO	0.5	2683	280.284	513.177	261.998	268.695	423.436	262.227	4.36079	39.9553	1.37905
GLR-DE_DMSO-SB_(11_6)_2020-11-13_2	9	9	DMSO	0.5	2716	273.686	508.405	258.795	259.78	424.886	256.909	4.52872	40.1325	1.91458
GLR-DE_DMSO-SB_(11_6)_2020-11-13_2	9	10	DMSO	0.5	1811	287.509	543.649	264.195	271.53	413.862	261.476	6.68139	42.0762	2.4296
GLR-DE_DMSO-SB_(11_6)_2020-11-13_2	9	11	DMSO	0.5	3314	278.543	621.739	258.488	265.557	485.433	260.17	4.7073	48.3705	0.6035
GLR-DE_DMSO-SB_(11_6)_2020-11-13_2	10	4	DMSO	0.6	2122	276.477	445.694	258.288	262.261	365.09	255.834	4.61828	29.5476	1.93214
GLR-DE_DMSO-SB_(11_6)_2020-11-13_2	10	5	DMSO	0.6	3225	271.407	464.961	255.684	263.223	375.039	256.512	3.25581	31.907	0.837209
GLR-DE_DMSO-SB_(11_6)_2020-11-13_2	10	6	DMSO	0.6	3632	278.497	494.708	255.672	270.219	389.286	257.971	3.5793	35.7654	0.385463
GLR-DE_DMSO-SB_(11_6)_2020-11-13_2	10	7	DMSO	0.6	3261	275.65	420.465	257.699	266.84	348.422	259.126	3.67985	24.1337	0.613309
GLR-DE_DMSO-SB_(11_6)_2020-11-13_2	10	8	DMSO	0.6	2476	266.503	442.023	254.923	256.804	355.863	255.078	3.75606	26.454	1.21163
GLR-DE_DMSO-SB_(11_6)_2020-11-13_2	10	9	DMSO	0.6	3552	275.279	489.06	259.234	267.308	398.202	261.038	2.98423	37.0214	0.816441
GLR-DE_DMSO-SB_(11_6)_2020-11-13_2	10	10	DMSO	0.6	2434	285.694	473.839	266.631	272.375	390.067	263.983	5.95727	34.3878	2.42399
GLR-DE_DMSO-SB_(11_6)_2020-11-13_2	10	11	DMSO	0.6	3000	282.488	489.17	259.645	271.328	377.498	262.967	4.6	33.5333	0.5
GLR-DE_DMSO-SB_(11_6)_2020-11-13_2	11	4	DMSO	0.7	2499	271.896	405.892	253.704	258.271	338.984	249.138	4.64186	20.2481	2.36094
GLR-DE_DMSO-SB_(11_6)_2020-11-13_2	11	5	DMSO	0.7	2869	271.094	374.864	253.662	263.378	328.49	254.42	3.45068	14.3604	0.97595
GLR-DE_DMSO-SB_(11_6)_2020-11-13_2	11	6	DMSO	0.7	2820	281.5	399.368	259.636	265.739	334.741	255.757	6.20567	19.7518	2.7305
GLR-DE_DMSO-SB_(11_6)_2020-11-13_2	11	7	DMSO	0.7	2584	276.934	396.991	263.399	265.375	334.255	261.53	4.68266	18.5372	1.66409
GLR-DE_DMSO-SB_(11_6)_2020-11-13_2	11	8	DMSO	0.7	2469	275.829	384.658	263.268	261.596	331.121	260.098	5.18428	16.1199	2.30863
GLR-DE_DMSO-SB_(11_6)_2020-11-13_2	11	9	DMSO	0.7	2151	275.732	410.027	266.46	263.538	344.418	263.026	5.29986	19.4793	2.55695
GLR-DE_DMSO-SB_(11_6)_2020-11-13_2	11	10	DMSO	0.7	2366	267.187	419.08	257.402	256.484	336.036	257	4.09975	21.6399	1.56382
GLR-DE_DMSO-SB_(11_6)_2020-11-13_2	11	11	DMSO	0.7	2185	268.6	474.123	259.041	256.275	345.17	256.858	4.62243	26.087	1.73913
GLR-DE_DMSO-SB_(11_6)_2020-11-13_2	12	4	DMSO	0.8	2443	261.33	361.875	247.771	249.469	316.279	243.892	3.60213	11.9935	2.00573
GLR-DE_DMSO-SB_(11_6)_2020-11-13_2	12	5	DMSO	0.8	2393	263.511	368.128	249.723	256.097	322.871	248.871	3.13414	13.4141	1.50439
GLR-DE_DMSO-SB_(11_6)_2020-11-13_2	12	6	DMSO	0.8	2922	273.35	359.185	258.548	262.195	320.819	255.684	4.03833	10.8487	1.30048
GLR-DE_DMSO-SB_(11_6)_2020-11-13_2	12	7	DMSO	0.8	2982	268.357	399.756	254.368	256.856	325.128	253.007	4.09121	18.3434	1.57612
GLR-DE_DMSO-SB_(11_6)_2020-11-13_2	12	8	DMSO	0.8	3317	265.722	393.551	255.93	260.424	334.384	258.665	2.47211	16.6717	0.66325
GLR-DE_DMSO-SB_(11_6)_2020-11-13_2	12	9	DMSO	0.8	2306	269.109	351.476	257.482	256.493	314.695	253.685	4.24978	10.1041	2.08153
GLR-DE_DMSO-SB_(11_6)_2020-11-13_2	12	10	DMSO	0.8	2860	269.157	384.833	259.665	259.66	327.185	259.131	3.07692	15.4895	1.43357
GLR-DE_DMSO-SB_(11_6)_2020-11-13_2	12	11	DMSO	0.8	3002	262.312	418.246	253.778	256.646	339.571	254.459	2.33178	21.7189	0.8994
GLR-DE_DMSO-SB_(11_6)_2020-11-13_2	13	4	DMSO	0.9	2466	263.419	339.747	252.524	254.671	311.565	251.036	2.6764	7.90754	1.62206
GLR-DE_DMSO-SB_(11_6)_2020-11-13_2	13	5	DMSO	0.9	2750	274.014	349.157	259.786	264.87	317.34	257.818	3.63636	9.34545	2.14545
GLR-DE_DMSO-SB_(11_6)_2020-11-13_2	13	6	DMSO	0.9	2692	259.268	375.12	250.052	252.734	321.792	249.845	2.41456	12.0728	1.11441
GLR-DE_DMSO-SB_(11_6)_2020-11-13_2	13	7	DMSO	0.9	2865	255.93	371.772	252.641	251.656	322.443	252.427	1.7103	12.3909	1.01222
GLR-DE_DMSO-SB_(11_6)_2020-11-13_2	13	8	DMSO	0.9	2891	274.829	377.97	266.77	260	326.323	257.513	5.29229	13.8015	3.18229
GLR-DE_DMSO-SB_(11_6)_2020-11-13_2	13	9	DMSO	0.9	2236	268.198	357.23	260.056	256.154	319.258	255.828	4.3381	10.3309	2.45975
GLR-DE_DMSO-SB_(11_6)_2020-11-13_2	13	10	DMSO	0.9	2561	274.726	403.604	265.303	261.423	337.465	261.107	5.11519	16.2046	2.92854
GLR-DE_DMSO-SB_(11_6)_2020-11-13_2	13	11	DMSO	0.9	2816	260.317	359.443	251.945	252.75	316.933	251.481	2.69886	11.0795	0.745739
GLR-DE_DMSO-SB_(11_6)_2020-11-13_2	14	4	DMSO	1	2656	258.552	333.74	248.042	250.45	307.103	245.771	2.63554	6.21235	1.28012
GLR-DE_DMSO-SB_(11_6)_2020-11-13_2	14	5	DMSO	1	2427	266.21	338.742	255.789	257.873	311.582	252.216	3.29625	6.5513	1.52452
GLR-DE_DMSO-SB_(11_6)_2020-11-13_2	14	6	DMSO	1	2488	257.759	336.3	254.892	247.762	310.62	253.162	3.37621	6.91318	2.09003
GLR-DE_DMSO-SB_(11_6)_2020-11-13_2	14	7	DMSO	1	2668	263.264	329.079	258.843	256.632	310.696	255.704	2.81109	5.28486	2.02399
GLR-DE_DMSO-SB_(11_6)_2020-11-13_2	14	8	DMSO	1	2262	258.657	334.178	256.854	250.642	309.471	254.55	2.96198	6.71972	2.16622
GLR-DE_DMSO-SB_(11_6)_2020-11-13_2	14	9	DMSO	1	1958	268.527	336.171	265.966	257.716	313.522	258.271	4.18795	7.35444	3.42186
GLR-DE_DMSO-SB_(11_6)_2020-11-13_2	14	10	DMSO	1	1920	276.358	347.707	271.798	259.918	316.378	259.991	6.19792	8.90625	5.3125
GLR-DE_DMSO-SB_(11_6)_2020-11-13_2	14	11	DMSO	1	1462	258.169	331.872	259.522	249.587	309.909	254.641	3.28317	6.01915	2.39398
GLR-DE_DMSO-SB_(11_6)_2020-11-13_2	3	14	SB431542	0.0045	2356	335.772	698.227	266.027	307.781	659.169	268.954	17.9117	61.0781	0.764007
GLR-DE_DMSO-SB_(11_6)_2020-11-13_2	3	15	SB431542	0.0045	2576	307.844	779.812	264.171	287.303	766.678	262.01	10.986	69.2935	2.25155
GLR-DE_DMSO-SB_(11_6)_2020-11-13_2	3	16	SB431542	0.0045	2292	314.616	726.504	260.717	292.105	699.261	262.442	12.6963	67.5393	1.00349
GLR-DE_DMSO-SB_(11_6)_2020-11-13_2	3	17	SB431542	0.0045	3235	310.06	708.689	264.361	291.005	687.992	267.26	10.1391	66.0278	0.556414
GLR-DE_DMSO-SB_(11_6)_2020-11-13_2	3	18	SB431542	0.0045	2968	307.668	647.782	254.516	284.272	622.068	255.895	11.5566	61.9272	0.943396
GLR-DE_DMSO-SB_(11_6)_2020-11-13_2	3	19	SB431542	0.0045	2517	315.76	595.38	252.151	288.189	556.142	253.021	14.6206	54.9066	1.07271
GLR-DE_DMSO-SB_(11_6)_2020-11-13_2	3	20	SB431542	0.0045	2776	321.202	688.601	263.213	297.203	664.118	262.804	13.4366	64.013	1.22478
GLR-DE_DMSO-SB_(11_6)_2020-11-13_2	3	21	SB431542	0.0045	3789	328.536	892.13	259.707	305.371	881.306	261.952	16.4687	74.0565	0.501452
GLR-DE_DMSO-SB_(11_6)_2020-11-13_2	4	14	SB431542	0.01	2321	310.703	679.136	260.616	286.483	655.798	259.618	11.7191	63.2486	1.93882
GLR-DE_DMSO-SB_(11_6)_2020-11-13_2	4	15	SB431542	0.01	2621	303.9	702.182	263.348	288.655	686.528	262.137	8.77528	68.3708	1.25906
GLR-DE_DMSO-SB_(11_6)_2020-11-13_2	4	16	SB431542	0.01	2096	304.994	645.844	259.797	284.081	604.767	261.201	10.0191	58.5878	1.14504
GLR-DE_DMSO-SB_(11_6)_2020-11-13_2	4	17	SB431542	0.01	2618	324.507	815.913	263.203	299.42	765.422	261.887	13.4454	65.1642	0.993124
GLR-DE_DMSO-SB_(11_6)_2020-11-13_2	4	18	SB431542	0.01	3639	316.365	852.427	262.669	296.587	857.193	265.871	12.2561	71.3108	0.577082
GLR-DE_DMSO-SB_(11_6)_2020-11-13_2	4	19	SB431542	0.01	3068	307.417	728.457	262.993	291.05	705.375	263.101	9.64798	67.4055	1.04302
GLR-DE_DMSO-SB_(11_6)_2020-11-13_2	4	20	SB431542	0.01	2558	309.995	729.636	256.134	291.219	684.226	254.448	10.4378	65.0899	1.17279
GLR-DE_DMSO-SB_(11_6)_2020-11-13_2	4	21	SB431542	0.01	3155	309.341	776.631	257.431	290.958	733.264	259.226	10.4279	70.6181	0.950872
GLR-DE_DMSO-SB_(11_6)_2020-11-13_2	5	14	SB431542	0.021	3182	311.873	681.076	265.626	294.591	662.595	266.869	10.1823	64.3306	1.06851
GLR-DE_DMSO-SB_(11_6)_2020-11-13_2	5	15	SB431542	0.021	2434	310.003	712.271	264.168	289.74	699.067	264.88	10.3122	68.4059	0.739523
GLR-DE_DMSO-SB_(11_6)_2020-11-13_2	5	16	SB431542	0.021	2009	312.105	633.3	262.686	287.979	578.125	259.069	10.7018	55.9482	2.04082
GLR-DE_DMSO-SB_(11_6)_2020-11-13_2	5	17	SB431542	0.021	1911	312.437	696.005	267.337	290.018	649.178	265.13	10.7797	63.056	2.09314
GLR-DE_DMSO-SB_(11_6)_2020-11-13_2	5	18	SB431542	0.021	3426	308.054	814.429	257.288	285.784	801.649	258.923	11.15	72.5044	0.788091
GLR-DE_DMSO-SB_(11_6)_2020-11-13_2	5	19	SB431542	0.021	2888	298.427	725.565	259.065	285.273	706.953	260.125	7.06371	68.1094	1.03878
GLR-DE_DMSO-SB_(11_6)_2020-11-13_2	5	20	SB431542	0.021	2135	305.184	774.995	256.205	284.382	708.485	254.438	10.0234	65.3864	1.45199
GLR-DE_DMSO-SB_(11_6)_2020-11-13_2	5	21	SB431542	0.021	3142	310.158	783.793	256.976	289.204	759.982	257.606	11.1076	69.8918	1.3049
GLR-DE_DMSO-SB_(11_6)_2020-11-13_2	6	14	SB431542	0.046	3591	316.084	758.122	264.442	294.532	721.326	266.702	11.9744	66.8894	1.33667
GLR-DE_DMSO-SB_(11_6)_2020-11-13_2	6	15	SB431542	0.046	2515	313.455	646.632	256.413	290.89	615.265	257.656	12.008	60.7952	0.83499
GLR-DE_DMSO-SB_(11_6)_2020-11-13_2	6	16	SB431542	0.046	2665	302.735	670.612	255.884	282.672	645.911	257.434	9.94371	63.7523	1.08818
GLR-DE_DMSO-SB_(11_6)_2020-11-13_2	6	17	SB431542	0.046	1950	314.938	615.589	265.567	289.351	564.414	262.614	11.8974	56.4103	2.30769
GLR-DE_DMSO-SB_(11_6)_2020-11-13_2	6	18	SB431542	0.046	3118	316.678	692.32	255.97	288.969	668.481	259	13.5343	62.5722	0.769724
GLR-DE_DMSO-SB_(11_6)_2020-11-13_2	6	19	SB431542	0.046	3051	315.757	711.447	256.417	292.358	666.267	258.969	13.7332	62.0452	0.85218
GLR-DE_DMSO-SB_(11_6)_2020-11-13_2	6	20	SB431542	0.046	3647	305.808	762.003	253.671	284.524	767.823	256.618	10.584	71.2915	0.411297
GLR-DE_DMSO-SB_(11_6)_2020-11-13_2	6	21	SB431542	0.046	2126	308.858	631.956	258.802	285.274	619.562	256.704	11.4299	61.3829	1.78739
GLR-DE_DMSO-SB_(11_6)_2020-11-13_2	7	14	SB431542	0.098	4039	327.093	685.802	266.331	300.872	664.383	268.835	14.3105	63.8524	0.569448
GLR-DE_DMSO-SB_(11_6)_2020-11-13_2	7	15	SB431542	0.098	3637	318.353	660.81	262.638	295.491	629.621	265.702	12.0704	60.7369	0.714875
GLR-DE_DMSO-SB_(11_6)_2020-11-13_2	7	16	SB431542	0.098	2739	319.396	620.416	264.726	293.343	561.536	263.153	14.0197	55.4582	1.93501
GLR-DE_DMSO-SB_(11_6)_2020-11-13_2	7	17	SB431542	0.098	2294	317.917	635.417	268.094	294.107	596.927	268.251	12.2929	59.0235	1.78727
GLR-DE_DMSO-SB_(11_6)_2020-11-13_2	7	18	SB431542	0.098	3439	325.22	606.706	262.204	299.861	522.737	264.614	15.3242	51.4684	0.523408
GLR-DE_DMSO-SB_(11_6)_2020-11-13_2	7	19	SB431542	0.098	3161	302.749	772.882	262.11	281.584	717.039	263.438	9.83866	64.0936	1.04397
GLR-DE_DMSO-SB_(11_6)_2020-11-13_2	7	20	SB431542	0.098	2502	325.537	620.91	266.173	299.842	548.115	264.832	14.7482	53.5572	1.43885
GLR-DE_DMSO-SB_(11_6)_2020-11-13_2	7	21	SB431542	0.098	2143	309.693	696.247	260.966	285.416	627.86	256.915	13.1591	58.3294	2.79981
GLR-DE_DMSO-SB_(11_6)_2020-11-13_2	8	14	SB431542	0.21	3108	317.837	560.772	264.581	294.565	460.894	267.579	14.5431	46.8468	0.353925
GLR-DE_DMSO-SB_(11_6)_2020-11-13_2	8	15	SB431542	0.21	3526	327.046	599.521	270.122	299.848	491.57	273.845	15.5701	48.8939	0.595576
GLR-DE_DMSO-SB_(11_6)_2020-11-13_2	8	16	SB431542	0.21	3333	344.507	538.271	267.337	310.496	427.008	270.715	20.8821	44.1344	0.690069
GLR-DE_DMSO-SB_(11_6)_2020-11-13_2	8	17	SB431542	0.21	2879	319.817	520.546	264.773	291.717	408.392	264.397	14.3105	41.4033	0.903091
GLR-DE_DMSO-SB_(11_6)_2020-11-13_2	8	18	SB431542	0.21	2581	314.837	615.152	263.084	286.449	553.744	263.052	12.2433	54.2038	1.04611
GLR-DE_DMSO-SB_(11_6)_2020-11-13_2	8	19	SB431542	0.21	2779	313.911	542.385	268.282	287.121	398.457	268.136	13.0982	41.0939	1.47535
GLR-DE_DMSO-SB_(11_6)_2020-11-13_2	8	20	SB431542	0.21	2638	305.505	581.629	257.725	281.8	513.45	260.853	12.0167	50.7961	0.871873
GLR-DE_DMSO-SB_(11_6)_2020-11-13_2	8	21	SB431542	0.21	1776	324.267	562.763	268.571	289.029	366.765	265.506	17.6802	39.6396	2.7027
GLR-DE_DMSO-SB_(11_6)_2020-11-13_2	9	14	SB431542	0.46	2003	336.768	419.053	287.43	299.561	335.765	278.389	19.3709	24.2137	4.94259
GLR-DE_DMSO-SB_(11_6)_2020-11-13_2	9	15	SB431542	0.46	2632	337.028	451.16	275.664	305.183	342.296	275.661	19.6049	26.7477	1.48176
GLR-DE_DMSO-SB_(11_6)_2020-11-13_2	9	16	SB431542	0.46	3721	332.321	469.878	276.557	304.957	365.268	278.481	16.4472	33.62	0.725611
GLR-DE_DMSO-SB_(11_6)_2020-11-13_2	9	17	SB431542	0.46	3192	332.2	459.309	271.897	301.923	354.956	271.733	17.7005	31.6416	1.2218
GLR-DE_DMSO-SB_(11_6)_2020-11-13_2	9	18	SB431542	0.46	2103	307.189	459.62	272.595	283.746	355.499	267.473	10.6039	32.1921	2.71041
GLR-DE_DMSO-SB_(11_6)_2020-11-13_2	9	19	SB431542	0.46	2230	306.774	453.216	270.164	281.517	330.971	269.341	12.1076	26.861	1.39013
GLR-DE_DMSO-SB_(11_6)_2020-11-13_2	9	20	SB431542	0.46	2557	328.566	445.983	273.607	289.418	328.973	269.799	18.1463	25.8897	2.46382
GLR-DE_DMSO-SB_(11_6)_2020-11-13_2	9	21	SB431542	0.46	1998	326.195	398.827	274.614	289.875	320.567	273.906	17.968	19.2693	1.75175
GLR-DE_DMSO-SB_(11_6)_2020-11-13_2	10	14	SB431542	0.99	2212	325.191	328.684	307.05	291.62	312.533	299.851	17.179	5.1085	4.74684
GLR-DE_DMSO-SB_(11_6)_2020-11-13_2	10	15	SB431542	0.99	1833	330.913	346.9	309.34	300.6	324.337	307.091	17.4032	6.38298	3.65521
GLR-DE_DMSO-SB_(11_6)_2020-11-13_2	10	16	SB431542	0.99	2953	310.303	334.682	290.168	280.37	310.445	290.461	14.5276	5.72299	1.32069
GLR-DE_DMSO-SB_(11_6)_2020-11-13_2	10	17	SB431542	0.99	2690	333.651	348.923	307.387	300.808	322.486	304.291	19.368	8.36431	3.56877
GLR-DE_DMSO-SB_(11_6)_2020-11-13_2	10	18	SB431542	0.99	2299	311.513	326.49	290.962	283.13	308.822	291.315	13.2231	4.74119	2.17486
GLR-DE_DMSO-SB_(11_6)_2020-11-13_2	10	19	SB431542	0.99	1750	292.031	328.766	306.699	276.253	312.162	301.308	6.4	4.97143	4
GLR-DE_DMSO-SB_(11_6)_2020-11-13_2	10	20	SB431542	0.99	2601	315.732	324.791	299.495	281.276	308.669	297.272	15.2634	5.07497	2.9604
GLR-DE_DMSO-SB_(11_6)_2020-11-13_2	10	21	SB431542	0.99	1704	295.851	318.47	301.201	268.712	303.375	292.423	9.97653	4.51878	4.22535
GLR-DE_DMSO-SB_(11_6)_2020-11-13_2	11	14	SB431542	2.14	2454	290.22	315.393	339.785	272.126	315.653	337.278	8.19071	0.570497	6.39772
GLR-DE_DMSO-SB_(11_6)_2020-11-13_2	11	15	SB431542	2.14	1950	295.558	309.277	331.828	270.837	306.651	326.287	9.1282	0.666667	5.33333
GLR-DE_DMSO-SB_(11_6)_2020-11-13_2	11	16	SB431542	2.14	1946	286.107	305.966	334.541	268.089	303.478	330.216	7.45118	0.668037	6.57759
GLR-DE_DMSO-SB_(11_6)_2020-11-13_2	11	17	SB431542	2.14	2031	292.868	312.102	350.197	273.214	309.82	343.282	8.17331	1.28016	9.30576
GLR-DE_DMSO-SB_(11_6)_2020-11-13_2	11	18	SB431542	2.14	1993	299.961	312.945	342.24	276.53	311.188	336.263	9.58354	1.40492	6.52283
GLR-DE_DMSO-SB_(11_6)_2020-11-13_2	11	19	SB431542	2.14	1835	294.637	306.076	332.993	269.561	299.681	322.144	8.22888	1.25341	7.84741
GLR-DE_DMSO-SB_(11_6)_2020-11-13_2	11	20	SB431542	2.14	2169	288.963	305.412	327.271	269.149	302.769	322.87	7.92992	1.42923	5.57861
GLR-DE_DMSO-SB_(11_6)_2020-11-13_2	11	21	SB431542	2.14	1638	270.323	299.129	314.058	254.567	293.567	308.869	5.0061	0.976801	4.2735
GLR-DE_DMSO-SB_(11_6)_2020-11-13_2	12	14	SB431542	4.63	2840	283.259	319.202	419.589	270.177	317.522	410.688	5.03521	1.09155	45.3873
GLR-DE_DMSO-SB_(11_6)_2020-11-13_2	12	15	SB431542	4.63	2383	279.413	309.917	372.184	263.43	308.158	364.895	5.66513	0.881242	19.3034
GLR-DE_DMSO-SB_(11_6)_2020-11-13_2	12	16	SB431542	4.63	1782	286.007	311.491	389.679	267.156	305.253	376.254	7.01459	1.23457	26.3187
GLR-DE_DMSO-SB_(11_6)_2020-11-13_2	12	17	SB431542	4.63	1673	281.792	307.509	380.18	266.412	306.541	374.565	5.55888	0.537956	23.2516
GLR-DE_DMSO-SB_(11_6)_2020-11-13_2	12	18	SB431542	4.63	2474	292.14	313.35	353.129	270.418	310.274	346.125	7.96281	0.767987	11.9644
GLR-DE_DMSO-SB_(11_6)_2020-11-13_2	12	19	SB431542	4.63	2810	275.811	313.475	402.064	265.831	313.521	397.654	4.27046	0.640569	36.8327
GLR-DE_DMSO-SB_(11_6)_2020-11-13_2	12	20	SB431542	4.63	2265	297.106	316.568	401.021	274.104	311.2	388.248	8.87417	1.63355	33.2892
GLR-DE_DMSO-SB_(11_6)_2020-11-13_2	12	21	SB431542	4.63	2042	294.099	318.524	395.297	266.46	314.334	381.474	10.9696	1.86092	27.8648
GLR-DE_DMSO-SB_(11_6)_2020-11-13_2	13	14	SB431542	10	1367	298.193	341.301	586.252	276.868	335.462	568.683	8.77835	1.68252	89.7586
GLR-DE_DMSO-SB_(11_6)_2020-11-13_2	13	15	SB431542	10	1578	278.778	324.064	536.823	262.396	322.261	518.144	5.89354	1.14068	81.3688
GLR-DE_DMSO-SB_(11_6)_2020-11-13_2	13	16	SB431542	10	1286	305.341	334.087	585.254	275.999	327.504	556.092	11.2753	1.71073	87.5583
GLR-DE_DMSO-SB_(11_6)_2020-11-13_2	13	17	SB431542	10	966	302.213	318.578	488.644	267.139	309.331	461.899	13.9752	1.75983	65.4244
GLR-DE_DMSO-SB_(11_6)_2020-11-13_2	13	18	SB431542	10	992	307.017	324.859	528.749	284.714	323.288	522.889	13.1048	1.31048	81.5524
GLR-DE_DMSO-SB_(11_6)_2020-11-13_2	13	19	SB431542	10	1123	285.486	321.218	505.544	262.981	315.034	486.451	8.45948	1.42475	72.3063
GLR-DE_DMSO-SB_(11_6)_2020-11-13_2	13	20	SB431542	10	1500	284.235	321.779	510.028	263.065	315.92	489.599	7.86667	1.13333	78.2
GLR-DE_DMSO-SB_(11_6)_2020-11-13_2	13	21	SB431542	10	1587	313.96	338.425	529.645	280.572	330.529	496.16	13.9887	2.96156	77.1897
GLR-DE_DMSO-SB_(11_6)_2020-11-13_2	14	14	SB431542	5	1519	280.83	323.021	411.427	270.117	322.387	405.816	4.93746	0.724161	42.528
GLR-DE_DMSO-SB_(11_6)_2020-11-13_2	14	15	SB431542	5	1759	280.028	324.45	407.774	269.371	325.501	400.122	4.32064	0.511654	40.5344
GLR-DE_DMSO-SB_(11_6)_2020-11-13_2	14	16	SB431542	5	1107	279.186	324.707	473.639	264.667	321.052	463.031	5.69106	1.26468	72.3577
GLR-DE_DMSO-SB_(11_6)_2020-11-13_2	14	17	SB431542	5	967	262.867	310.349	385.256	252.634	307.203	379.954	4.23992	0.723888	29.3692
GLR-DE_DMSO-SB_(11_6)_2020-11-13_2	14	18	SB431542	5	1261	290.348	321.518	458.734	265.381	315.534	435.92	9.75416	2.14116	56.701
GLR-DE_DMSO-SB_(11_6)_2020-11-13_2	14	19	SB431542	5	1259	307.753	330.33	419.998	284.308	327.4	411.858	10.4051	1.42971	46.3066
GLR-DE_DMSO-SB_(11_6)_2020-11-13_2	14	20	SB431542	5	1151	315.994	329.862	485.099	277.356	318.509	447.587	15.7255	3.38836	62.6412
GLR-DE_DMSO-SB_(11_6)_2020-11-13_2	14	21	SB431542	5	1947	272.611	317.826	429.506	259.548	314.745	417.993	4.93066	0.770416	49.4607

## Sheet: DevTox GLR-Endo Ref Chem
Plate	Row	Column	Bio_Rep	Treatment	Conc_µM	Cell Count	Sox17 Well Mean	Sox17 Well Median	Sox17 Well Std	Sox17 Well MAD	Sox2 Well Mean	Sox2 Well Median	Sox2 Well Std	Sox2 Well MAD	Bra Well Mean	Bra Well Median	Bra Well Std	Bra Well MAD	%Sox17+ Cells	%Sox2+ Cells	%Bra+ Cells
RUES-GLR RefChem2 P1 2021-01-25	A	14	5	PluriControl		6316	266.456	262.99	44.6177	35.7121	992.156	979.063	326.895	304.82	268.154	254.839	97.309	43.5862	1.40912	92.5427	3.07156
RUES-GLR RefChem2 P1 2021-01-25	B	14	5	PluriControl		5118	257.121	256.068	40.5051	30.2361	871.639	872.965	279.147	266.09	259.637	247.484	97.907	36.0294	1.17233	88.5893	3.38023
RUES-GLR RefChem2 P1 2021-01-25	C	14	5	PluriControl		4183	258.54	257.166	46.5345	33.8641	836.195	850.491	282.294	261.233	261.482	243.84	112.33	40.8338	1.33875	85.4172	4.08798
RUES-GLR RefChem2 P1 2021-01-25	D	14	5	PluriControl		3821	258.315	258.317	39.4668	34.1339	915.959	895.226	332.782	321.053	260.061	251.789	85.7993	41.3957	0.811306	87.5425	2.82649
RUES-GLR RefChem2 P1 2021-01-25	E	14	5	PluriControl		5972	259.109	256.987	43.132	32.0879	907.797	895.018	322.569	302.799	269.026	251.045	198.522	38.323	1.28935	88.58	2.84662
RUES-GLR RefChem2 P1 2021-01-25	F	14	5	PluriControl		4928	251.521	251.607	34.4186	32.1131	771.774	770.79	245.538	237.29	249.09	246.251	63.8704	37.2414	0.405844	84.2127	1.19724
RUES-GLR RefChem2 P1 2021-01-25	G	14	5	PluriControl		3904	262.806	260.412	43.5132	36.6343	925.039	891.186	411.107	397.724	267.236	254.573	96.4711	41.7582	1.25512	82.9918	3.91906
RUES-GLR RefChem2 P1 2021-01-25	H	14	5	PluriControl		4871	257.002	254.729	39.0039	33.1183	821.711	830.227	266.161	266.635	266.922	250.146	153.361	38.8604	0.964894	85.2392	3.14104
RUES-GLR RefChem2 P1 2021-01-25	I	14	5	PluriControl		5855	256.905	255.399	38.0783	29.5808	805.5	826.607	257.538	242.914	258.936	250.555	83.4286	35.8374	0.768574	84.3553	2.51067
RUES-GLR RefChem2 P1 2021-01-25	J	14	5	PluriControl		4679	260.306	259.44	39.5667	33.3422	817.164	830.954	260.992	252.436	264.47	254.221	86.0067	39.6818	0.940372	85.3815	3.2913
RUES-GLR RefChem2 P1 2021-01-25	K	14	5	PluriControl		5033	258.552	258.238	37.9724	30.4318	818.304	841.146	282.952	269.928	255.141	248.407	80.4514	39.8078	0.69541	83.4492	1.94715
RUES-GLR RefChem2 P1 2021-01-25	L	14	5	PluriControl		4712	260.969	261.112	38.5249	34.6306	837.679	842.31	287.869	280.798	256.605	250.858	77.5667	37.7159	0.679117	84.8896	2.05857
RUES-GLR RefChem2 P1 2021-01-25	M	14	5	PluriControl		6204	252.666	254.084	35.6648	33.251	816.65	823.149	269.339	266.069	259.186	256.296	67.6544	40.7671	0.531915	84.4455	1.61186
RUES-GLR RefChem2 P1 2021-01-25	N	14	5	PluriControl		4864	261.992	260.841	36.4078	31.7195	886.356	894.528	293.987	286.291	252.166	245.157	73.1774	36.8137	0.596217	87.7261	1.97368
RUES-GLR RefChem2 P1 2021-01-25	O	14	5	PluriControl		5134	249.804	250.197	36.7492	29.2265	761.527	763.944	263.048	252.611	259.711	255.654	68.5146	39.2007	0.311648	80.522	1.42189
RUES-GLR RefChem2 P1 2021-01-25	P	14	5	PluriControl		5590	256.099	256.791	37.6435	32.5987	920.788	909.923	337.107	326.236	261.522	255.523	76.5699	40.0406	0.572451	87.4061	1.86047
RUES-GLR RefChem2 P1 2021-01-25	A	1	5	Aspirin	100	4586	791.075	765.636	456.722	531.861	312.766	288.06	109.114	46.6011	238.623	237.826	48.7773	37.9479	72.3724	3.9686	0.784998
RUES-GLR RefChem2 P1 2021-01-25	A	2	5	Aspirin	24.3	6128	835.884	835.738	397.882	413.167	307.972	291.058	95.0471	46.4247	247.739	247.043	51.2857	38.9931	80.9726	3.01893	0.652742
RUES-GLR RefChem2 P1 2021-01-25	A	3	5	Aspirin	5.93	5288	1719.75	1698.59	1081.54	1188.73	316.502	289.932	115.792	52.8621	246.818	244.834	56.598	36.5854	82.2617	3.59304	0.907716
RUES-GLR RefChem2 P1 2021-01-25	A	4	5	Aspirin	1.44	4261	909.051	873.238	496.039	503.2	300.239	278.849	102.899	50.9925	234.709	233.308	47.8404	37.615	80.169	2.83971	0.657123
RUES-GLR RefChem2 P1 2021-01-25	A	5	5	Aspirin	0.351	4766	859.869	839.193	469.118	489.701	301.671	279.126	110.513	46.9391	243.944	240.197	66.0882	38.4572	77.6542	2.93747	1.46874
RUES-GLR RefChem2 P1 2021-01-25	A	6	5	Aspirin	0.0855	3141	637.821	606.373	339.624	412.941	301.57	276.656	104.898	51.7131	244.664	239.543	61.3579	39.4713	66.985	3.4384	1.49634
RUES-GLR RefChem2 P1 2021-01-25	A	7	5	Aspirin	0.0208	3911	741.204	687.767	405.695	414.802	297.447	279.113	100.649	48.0955	244.514	243.948	56.3367	40.8782	75.2749	2.48018	0.792636
RUES-GLR RefChem2 P1 2021-01-25	A	8	5	Aspirin	0.00506	3957	707.711	693.168	357.1	373.446	301.551	281.038	98.6819	50.3165	244.41	240.745	62.3627	37.6373	74.8294	2.52717	1.26358
RUES-GLR RefChem2 P1 2021-01-25	A	9	5	Aspirin	0.00123	5660	922.981	907.261	490.388	511.556	301.731	285.679	85.027	46.4417	243.975	243.943	44.4526	40.4957	80.1413	2.59717	0.4947
RUES-GLR RefChem2 P1 2021-01-25	A	10	5	Aspirin	0.0003	4955	1017.96	996.745	585.832	638.394	316.565	291.055	116.386	51.4344	251.146	248.916	63.0841	38.4586	79.0111	3.79415	1.10999
RUES-GLR RefChem2 P1 2021-01-25	A	11	5	DEControl		6085	1657.05	1674.76	923.273	917.314	328.774	300.867	109.639	57.4596	243.312	243.288	43.0272	38.4038	85.0781	5.06163	0.279376
RUES-GLR RefChem2 P1 2021-01-25	A	12	5	DMSOControl		5540	869.354	863.894	432.658	439.551	304.33	289.706	84.0258	43.879	251.218	252.899	44.7582	38.7062	80.9928	2.23827	0.487365
RUES-GLR RefChem2 P1 2021-01-25	A	13	5	SB431542		5931	287.681	246.715	162.322	33.8122	312.001	282.764	107.151	49.4136	264.235	264.964	49.9455	42.7122	9.13843	4.65352	0.623841
RUES-GLR RefChem2 P1 2021-01-25	A	15	5	Lenalidomide	100	4826	528.747	396.841	339.928	253.824	292.854	278.635	86.7623	40.8938	251.465	250.333	55.0182	39.2504	47.7828	1.92706	0.683796
RUES-GLR RefChem2 P1 2021-01-25	A	16	5	Lenalidomide	24.3	5236	524.018	374.439	337.689	225.055	295.825	280.456	84.1793	43.4646	251.338	251.734	45.1629	40.5195	46.6769	2.10084	0.439267
RUES-GLR RefChem2 P1 2021-01-25	A	17	5	Lenalidomide	5.93	4047	506.636	346.455	343.53	203.128	281.762	265.189	95.8211	41.6596	244.908	244.227	55.5759	39.2874	44.8233	1.92735	0.889548
RUES-GLR RefChem2 P1 2021-01-25	A	18	5	Lenalidomide	14.4	5098	549.203	416.998	353.112	277.764	289.119	276.471	83.1472	40.6314	247.105	247.328	48.6936	38.34	49.7842	1.86348	0.470773
RUES-GLR RefChem2 P1 2021-01-25	A	19	5	Lenalidomide	0.351	5086	558.061	481.702	333.013	353.006	293.074	277.911	83.1436	41.2081	245.852	245.599	52.2503	38.4727	54.188	1.84821	0.491545
RUES-GLR RefChem2 P1 2021-01-25	A	20	5	Lenalidomide	8.55	5623	615.171	543.019	369.272	422.716	286.164	276.934	71.5599	38.7581	247.481	249.35	47.3736	38.0628	58.4919	0.889205	0.195625
RUES-GLR RefChem2 P1 2021-01-25	A	21	5	Lenalidomide	2.08	4495	536.15	409.874	345.592	275.132	292.829	274.608	98.4428	42.6841	249.833	249.766	55.9463	37.1495	49.4327	2.44716	0.912125
RUES-GLR RefChem2 P1 2021-01-25	A	22	5	Lenalidomide	0.506	4886	715.611	628.852	470.636	540.962	297.258	280.256	87.12	47.524	246.886	248.101	46.0874	37.6358	61.932	2.29226	0.429799
RUES-GLR RefChem2 P1 2021-01-25	A	23	5	Lenalidomide	0.0123	4935	633.44	603.319	341.668	400.991	310.892	287.731	96.8091	55.0356	247.201	247.568	46.5081	39.025	66.7882	3.52584	0.567376
RUES-GLR RefChem2 P1 2021-01-25	A	24	5	Lenalidomide	0.003	5282	838.322	825.126	428.693	438.838	309.756	289.514	87.5632	51.7628	245.515	246.603	43.6221	37.9887	79.5532	2.7641	0.454373
RUES-GLR RefChem2 P1 2021-01-25	B	1	5	ATRA	100	1474	325.007	321.548	71.3254	77.812	651.973	635.217	232.284	259.791	673.556	664.323	224.435	230.743	9.36228	65.4003	82.2931
RUES-GLR RefChem2 P1 2021-01-25	B	2	5	ATRA	24.3	1589	335.541	328.995	71.329	75.3487	663.062	644.377	234.592	247.243	649.67	631.772	213.044	215.345	11.6425	68.0931	81.4349
RUES-GLR RefChem2 P1 2021-01-25	B	3	5	ATRA	5.93	3994	240.73	240.93	36.0023	30.0293	336.619	306.36	124.058	60.9868	274.922	266.555	71.2694	44.8598	0.375563	5.15774	2.72909
RUES-GLR RefChem2 P1 2021-01-25	B	4	5	ATRA	1.44	3635	242.41	236.701	58.5563	29.8269	314.735	287.708	115.269	55.6642	246.678	243.732	58.2683	39.4831	1.48556	4.07153	1.21045
RUES-GLR RefChem2 P1 2021-01-25	B	5	5	ATRA	0.351	5209	373.793	271.761	235.464	75.918	306.139	279.868	108.21	48.2631	243.806	241.604	58.6575	38.7403	25.0144	3.80111	1.03667
RUES-GLR RefChem2 P1 2021-01-25	B	6	5	ATRA	0.0855	5565	919.204	535.108	872.02	459.258	326.99	285.324	133.093	62.2707	235.65	235.464	46.9354	37.111	55.3279	7.36748	0.449236
RUES-GLR RefChem2 P1 2021-01-25	B	7	5	ATRA	0.0208	6140	1246.76	1126.76	907.042	1102.67	321.628	292.077	123.5	56.7806	244.778	244.912	47.3828	38.939	72.5407	5.65147	0.472313
RUES-GLR RefChem2 P1 2021-01-25	B	8	5	ATRA	0.00506	4857	719.979	685.553	407.481	495.599	309.038	286.437	104.996	50.0333	250.094	246.883	75.3885	37.4549	69.7756	3.66481	1.25592
RUES-GLR RefChem2 P1 2021-01-25	B	9	5	ATRA	0.00123	5713	682.632	660.825	365.293	436.566	309.879	288.312	94.8219	47.8628	247.508	249.438	45.2236	36.2659	69.7007	3.27324	0.420095
RUES-GLR RefChem2 P1 2021-01-25	B	10	5	ATRA	0.0003	5984	748.865	741.548	364.633	385.909	304.916	287.476	86.5902	45.3209	247.71	249.449	40.9303	37.9523	77.6571	2.54011	0.200535
RUES-GLR RefChem2 P1 2021-01-25	B	11	5	DEControl		5314	751.906	731.906	403.947	461.821	316.989	291.596	102.479	52.9162	246.318	247.829	45.8549	35.8945	73.2593	4.45992	0.52691
RUES-GLR RefChem2 P1 2021-01-25	B	12	5	DMSOControl		5224	821.544	807.369	411.445	435.524	303.793	284.906	94.3758	45.8798	249.029	249.611	47.7798	38.1888	79.2879	2.96707	0.6317
RUES-GLR RefChem2 P1 2021-01-25	B	13	5	SB431542		5333	313.708	253.253	182.795	40.8694	327.785	291.026	126.702	61.0698	266.445	264.104	58.2916	44.177	14.3259	7.01294	1.05007
RUES-GLR RefChem2 P1 2021-01-25	B	15	5	Pomalidomide	100	4373	299.511	251.133	149.896	43.1185	295.496	270.1	105.328	42.2007	394.271	390.281	84.5748	70.3108	12.3714	3.93323	19.2316
RUES-GLR RefChem2 P1 2021-01-25	B	16	5	Pomalidomide	24.3	5026	319.816	256.81	166.151	49.8532	281.916	268.753	78.5013	35.1613	285.347	285.554	50.367	44.5314	16.7927	1.89017	0.795862
RUES-GLR RefChem2 P1 2021-01-25	B	17	5	Pomalidomide	5.93	4323	306.582	251.554	158.346	47.3453	292.56	266.03	112.079	43.67	251.743	249.472	59.5347	40.0791	13.9024	4.16378	1.20287
RUES-GLR RefChem2 P1 2021-01-25	B	18	5	Pomalidomide	14.4	4426	337.765	261.922	188.987	58.198	285.003	268.702	97.5477	34.5164	273.719	273.795	59.607	41.6536	19.7695	2.39494	0.790782
RUES-GLR RefChem2 P1 2021-01-25	B	19	5	Pomalidomide	0.351	4918	370.293	272.009	216.155	81.4429	287.531	271.478	89.3786	36.7099	250.422	251.223	48.6083	37.3697	26.2708	2.52135	0.793005
RUES-GLR RefChem2 P1 2021-01-25	B	20	5	Pomalidomide	8.55	4782	311.552	255.109	158.334	48.908	280.886	266.067	87.9676	33.274	261.646	260.668	50.0728	38.4868	15.6002	2.15391	0.857382
RUES-GLR RefChem2 P1 2021-01-25	B	21	5	Pomalidomide	2.08	4928	334.334	262.293	181.476	64.181	288.578	273.632	91.0043	37.8122	255.467	256.038	56.6679	37.8797	20.0284	2.15097	0.629058
RUES-GLR RefChem2 P1 2021-01-25	B	22	5	Pomalidomide	0.506	5191	356.104	263.829	196.316	69.0743	292.601	271.014	93.4068	43.0443	246.732	246.967	43.6262	38.6455	25.1589	3.19784	0.42381
RUES-GLR RefChem2 P1 2021-01-25	B	23	5	Pomalidomide	0.0123	4898	674.934	639.397	381.022	475.571	295.542	275.192	96.6364	40.2252	245.909	246.639	53.2328	38.2674	66.7415	3.00122	0.592078
RUES-GLR RefChem2 P1 2021-01-25	B	24	5	Pomalidomide	0.003	5505	842.004	819.971	457.923	500.269	294.361	276.773	91.4782	43.0102	246.963	243.158	58.7917	41.1095	76.9119	2.17984	0.563124
RUES-GLR RefChem2 P1 2021-01-25	C	1	5	Caffeine	100	5387	801.618	775.548	434.647	467.708	301.797	280.507	98.3455	46.7612	237.016	235.934	50.6454	36.0198	76.1463	2.84017	0.761092
RUES-GLR RefChem2 P1 2021-01-25	C	2	5	Caffeine	24.3	5960	912.429	881.706	471.295	492.368	288.429	270.839	97.8601	41.5306	232.817	231.561	50.8238	35.1369	82.4832	2.19799	0.671141
RUES-GLR RefChem2 P1 2021-01-25	C	3	5	Caffeine	5.93	5843	898.238	883.517	483.521	512.228	296.692	279.59	90.0885	42.4795	237.698	239.339	40.533	36.7537	79.0519	2.78966	0.359404
RUES-GLR RefChem2 P1 2021-01-25	C	4	5	Caffeine	1.44	6483	876.639	866.369	429.196	441.88	298.664	284.437	83.9847	42.9435	241.868	242.693	44.8067	35.4297	82.1842	2.15949	0.277649
RUES-GLR RefChem2 P1 2021-01-25	C	5	5	Caffeine	0.351	5608	792.165	777.406	405.823	423.135	296.426	278.437	97.2159	44.4543	245.397	242.143	68.8615	39.1784	77.8531	2.63909	0.731098
RUES-GLR RefChem2 P1 2021-01-25	C	6	5	Caffeine	0.0855	6212	853.945	855.337	406.693	415.711	295.261	283.218	87.0711	44.4936	241.999	243.595	45.1677	37.4816	81.8255	1.62589	0.257566
RUES-GLR RefChem2 P1 2021-01-25	C	7	5	Caffeine	0.0208	4995	720.984	689.891	370.594	390.508	293.029	275.185	98.1302	44.6411	259.095	241.743	132.447	40.2852	75.5155	2.32232	2.64264
RUES-GLR RefChem2 P1 2021-01-25	C	8	5	Caffeine	0.00506	5779	978.172	967.692	527.899	569.256	293.656	276.481	90.7938	42.4824	243.848	243.399	45.4759	39.7233	80.1177	2.83786	0.501817
RUES-GLR RefChem2 P1 2021-01-25	C	9	5	Caffeine	0.00123	5026	871.51	855.967	450.339	466.133	296.919	277.92	104.98	43.71	245.399	244.77	55.0036	39.8182	80.4815	3.20334	0.656586
RUES-GLR RefChem2 P1 2021-01-25	C	10	5	Caffeine	0.0003	5600	764.815	750.853	380.308	418.02	300.896	285.985	86.8921	43.8939	249.347	249.301	48.062	38.5091	77.5893	2.16071	0.428571
RUES-GLR RefChem2 P1 2021-01-25	C	11	5	DEControl		5215	791.759	785.928	369.485	385.301	309.281	288.74	106.761	44.2764	252.905	251.776	58.4683	38.1414	80.6711	3.01055	0.824545
RUES-GLR RefChem2 P1 2021-01-25	C	12	5	DMSOControl		5162	815.174	800.162	432.664	471.444	303.9	285.734	94.7332	42.8835	248.534	248.208	47.0283	38.0576	77.1213	3.06083	0.774893
RUES-GLR RefChem2 P1 2021-01-25	C	13	5	SB431542		4680	294.684	249.812	160.103	37.9034	305.658	281.267	108.947	48.5322	268.046	267.2	58.2327	45.1185	11.1111	3.99573	1.04701
RUES-GLR RefChem2 P1 2021-01-25	C	15	5	Saccharin	100	5246	818.887	810.163	412.436	440.707	299.467	284.042	86.0124	43.9168	248.158	249.038	46.0809	40.1421	78.3263	2.76401	0.457491
RUES-GLR RefChem2 P1 2021-01-25	C	16	5	Saccharin	24.3	5649	853.268	839.764	447.333	461.393	299.322	285.683	82.9153	43.154	251.229	253.304	39.8916	39.5854	78.8635	2.46061	0.265534
RUES-GLR RefChem2 P1 2021-01-25	C	17	5	Saccharin	5.93	5198	730.045	693.484	387.563	424.781	296.989	277.452	99.6727	43.9798	247.899	246.557	56.7112	38.1369	73.99	3.05887	0.827241
RUES-GLR RefChem2 P1 2021-01-25	C	18	5	Saccharin	14.4	5530	1239.56	1213.31	671.839	691.456	291.019	276.055	88.1219	42.2904	242.404	243.993	44.5208	37.0146	85.2984	2.1519	0.325497
RUES-GLR RefChem2 P1 2021-01-25	C	19	5	Saccharin	0.351	6007	689.03	677.337	333.399	364.724	297.154	284.482	78.9171	42.2111	248.321	250.914	47.7392	38.3267	74.8127	1.74796	0.316298
RUES-GLR RefChem2 P1 2021-01-25	C	20	5	Saccharin	8.55	4721	619.281	603.856	298.495	337.062	289.157	271.702	98.0297	40.773	240.811	239.103	59.8372	38.469	69.9852	2.37238	0.741368
RUES-GLR RefChem2 P1 2021-01-25	C	21	5	Saccharin	2.08	4752	649.155	646.66	311.231	340.062	298.606	278.837	94.4546	45.412	243.91	243.156	52.9085	37.7863	72.4116	3.09343	0.715488
RUES-GLR RefChem2 P1 2021-01-25	C	22	5	Saccharin	0.506	5484	686.678	660.61	351.758	394.799	292.375	276.527	94.2796	43.3001	240.784	240.979	56.0068	36.7351	72.4654	2.13348	0.346462
RUES-GLR RefChem2 P1 2021-01-25	C	23	5	Saccharin	0.0123	4802	924.239	905.054	519.392	577.925	294.019	274.631	102.853	43.1703	244.354	241.695	57.8174	38.214	77.7176	2.54061	1.10371
RUES-GLR RefChem2 P1 2021-01-25	C	24	5	Saccharin	0.003	5590	774.025	766.932	381.435	386.305	301.297	280.967	92.3523	50.269	240.826	240.46	50.1	38.2919	78.9088	2.64758	0.536673
RUES-GLR RefChem2 P1 2021-01-25	D	1	5	Folic Acid	100	5372	895.265	876.55	494.009	530.336	304.927	284.663	105.12	46.7597	244.257	243.701	53.1429	37.7744	78.1273	2.95979	0.651526
RUES-GLR RefChem2 P1 2021-01-25	D	2	5	Folic Acid	24.3	6262	1830.3	1841.42	1103.95	1186.97	305.954	287.305	92.0939	44.8108	237.358	238.629	42.4999	35.2666	84.7652	3.03417	0.399233
RUES-GLR RefChem2 P1 2021-01-25	D	3	5	Folic Acid	5.93	6153	715.285	699.609	346.236	368.721	304.103	286.589	95.5466	42.9094	239.866	240.481	42.5581	35.6417	76.9543	2.82789	0.406306
RUES-GLR RefChem2 P1 2021-01-25	D	4	5	Folic Acid	1.44	4767	901.022	903.417	443.617	437.342	289.42	271.889	110.633	40.5951	238.677	236.282	66.3321	37.1881	82.253	2.11873	0.797147
RUES-GLR RefChem2 P1 2021-01-25	D	5	5	Folic Acid	0.351	5844	953.999	947.852	471.522	481.666	296.571	279.503	89.916	43.1978	239.758	239.881	44.0587	36.9946	83.898	2.17317	0.462012
RUES-GLR RefChem2 P1 2021-01-25	D	6	5	Folic Acid	0.0855	5203	934.612	926.727	481.425	481.105	284.037	268.044	96.8651	38.0153	237.023	236.325	53.0419	36.2362	81.7221	1.84509	0.653469
RUES-GLR RefChem2 P1 2021-01-25	D	7	5	Folic Acid	0.0208	6268	838.134	830.326	392.758	389.609	299.215	285.127	86.9128	40.5625	248.313	248.81	48.4184	38.4379	82.6579	2.21761	0.446713
RUES-GLR RefChem2 P1 2021-01-25	D	8	5	Folic Acid	0.00506	5718	888.722	851.039	456.324	464.895	285.707	275.197	71.3457	41.5943	241.667	242.136	40.4719	38.0984	82.4589	1.29416	0.262329
RUES-GLR RefChem2 P1 2021-01-25	D	9	5	Folic Acid	0.00123	4843	682.969	650.106	355.414	386.198	297.815	282.486	92.6009	42.5017	255.904	249.782	63.1717	41.0947	71.9389	1.89965	1.1976
RUES-GLR RefChem2 P1 2021-01-25	D	10	5	Folic Acid	0.0003	6036	853.084	843.503	432.208	456.117	306.72	293.75	83.9993	44.9754	253.824	255.752	47.7008	39.2074	79.6554	2.00464	0.397614
RUES-GLR RefChem2 P1 2021-01-25	D	11	5	DEControl		4705	834.291	813.647	417.749	444.903	299.179	282.556	89.9203	46.0555	246.859	245.674	46.5592	40.3756	79.8087	2.48672	0.616366
RUES-GLR RefChem2 P1 2021-01-25	D	12	5	DMSOControl		5439	762.92	746.711	361.981	356.693	297.296	285.15	82.6609	45.071	253.55	253.446	48.0841	41.6151	79.5183	1.89373	0.588343
RUES-GLR RefChem2 P1 2021-01-25	D	13	5	SB431542		5208	333.097	255.298	208.794	46.4973	304.369	278.271	112.524	47.5307	262.153	259.837	60.8248	41.3682	17.2235	3.70584	0.864055
RUES-GLR RefChem2 P1 2021-01-25	D	15	5	Thalidomide	100	4954	432.656	291.044	274.27	108.73	286.192	272.837	86.1569	38.4846	248.007	248.126	48.8496	38.9561	35.002	2.1195	0.585386
RUES-GLR RefChem2 P1 2021-01-25	D	16	5	Thalidomide	24.3	3654	474.845	290.189	357.795	111.555	299.303	273.118	110.185	45.7723	249.312	247.806	55.3008	38.7292	35.5501	3.99562	1.01259
RUES-GLR RefChem2 P1 2021-01-25	D	17	5	Thalidomide	5.93	4839	504.386	393.291	306.516	236.976	286.952	272.509	88.3214	36.0761	246.741	247.662	52.1994	36.1532	47.3652	2.2112	0.764621
RUES-GLR RefChem2 P1 2021-01-25	D	18	5	Thalidomide	14.4	5180	456.461	328.913	277.722	160.328	288.501	269.156	104.832	41.71	246.645	244.78	56.298	40.3823	41.0618	3.01158	0.945946
RUES-GLR RefChem2 P1 2021-01-25	D	19	5	Thalidomide	0.351	5341	563.469	526.672	304.508	369.824	297.483	278.419	91.9545	41.7367	247.319	248.076	45.5352	37.5824	59.8015	3.31399	0.505523
RUES-GLR RefChem2 P1 2021-01-25	D	20	5	Thalidomide	8.55	4428	415.681	304.199	246.897	135.388	291.261	266.449	113.521	39.9027	241.98	239.887	62.9592	36.6869	36.1789	3.20687	0.993677
RUES-GLR RefChem2 P1 2021-01-25	D	21	5	Thalidomide	2.08	5250	588.197	519.844	350.866	388.197	294.741	279.825	85.5086	39.7337	247.862	248.685	47.4003	40.4246	57.8286	2.55238	0.571429
RUES-GLR RefChem2 P1 2021-01-25	D	22	5	Thalidomide	0.506	4752	572.505	523.765	314.013	362.751	292.55	271.143	105.657	45.0547	245.478	243.58	56.1249	39.0917	60.7323	3.40909	0.883838
RUES-GLR RefChem2 P1 2021-01-25	D	23	5	Thalidomide	0.0123	5090	767.47	748.995	401.839	448.725	299.623	279.421	101.629	42.7078	246.933	246.724	53.4299	37.7485	75.1473	3.06483	0.825147
RUES-GLR RefChem2 P1 2021-01-25	D	24	5	Thalidomide	0.003	4782	669.194	646.975	347.279	390.948	304.512	284.207	97.9174	47.2401	247.751	247.286	52.2658	38.5899	71.2254	2.76035	0.711
RUES-GLR RefChem2 P1 2021-01-25	E	1	5	Lenalidomide	100	4986	673.561	513.082	502.236	421.113	280.81	261.88	112.177	36.701	234.951	232.089	66.5085	34.6587	54.1717	2.12595	0.862415
RUES-GLR RefChem2 P1 2021-01-25	E	2	5	Lenalidomide	24.3	4141	624.651	460.805	447.74	354.052	287.426	266.082	104.911	41.4698	239.039	236.159	57.8112	34.5609	52.4511	2.60807	1.27988
RUES-GLR RefChem2 P1 2021-01-25	E	3	5	Lenalidomide	5.93	5382	494.647	422.292	278.412	272.517	293.117	278.163	89.6966	41.1585	239.136	238.361	50.2238	37.0909	50.0929	2.17391	0.631735
RUES-GLR RefChem2 P1 2021-01-25	E	4	5	Lenalidomide	1.44	4802	531.95	402.205	356.074	264.572	284.625	265.394	96.551	38.7181	235.847	232.721	54.3261	34.9471	48.5423	2.43648	0.853811
RUES-GLR RefChem2 P1 2021-01-25	E	5	5	Lenalidomide	0.351	5154	902.36	795.216	648.554	769.435	284.979	268.037	98.4732	38.9234	239.074	236.621	52.9803	37.7366	64.7458	2.4447	0.911913
RUES-GLR RefChem2 P1 2021-01-25	E	6	5	Lenalidomide	0.0855	4454	642.142	559.559	398.241	437.029	294.793	272.921	108.783	46.4269	242.38	239.192	62.8569	38.1214	60.3278	2.89627	1.3471
RUES-GLR RefChem2 P1 2021-01-25	E	7	5	Lenalidomide	0.0208	4829	678.589	643.595	361.9	397.59	287.619	268.881	100.484	35.5394	236.333	233.912	55.0348	35.2192	71.257	2.65065	0.786912
RUES-GLR RefChem2 P1 2021-01-25	E	8	5	Lenalidomide	0.00506	5450	923.974	896.217	515.405	539.292	291.602	277.289	89.1103	43.6566	242.62	242.363	50.4411	38.3675	78.7156	1.88991	0.458716
RUES-GLR RefChem2 P1 2021-01-25	E	9	5	Lenalidomide	0.00123	5827	683.424	675.164	314.881	333.124	297.512	282.929	83.2944	44.8457	246.434	246.355	43.4894	37.664	76.1284	2.21383	0.291745
RUES-GLR RefChem2 P1 2021-01-25	E	10	5	Lenalidomide	0.0003	4854	841.369	830.756	414.13	442.468	295.429	280.851	84.5732	44.5959	248.792	248.014	49.6814	39.6447	80.1607	2.16316	0.576844
RUES-GLR RefChem2 P1 2021-01-25	E	11	5	DEControl		5050	790.612	781.078	403.185	430.885	306.559	288.506	91.9674	49.1497	245.674	246.193	44.0287	40.1673	77.4653	2.69307	0.376238
RUES-GLR RefChem2 P1 2021-01-25	E	12	5	DMSOControl		5591	796.282	788.304	394.054	421.764	295.615	282.955	84.3566	41.796	247.438	248.382	44.8769	38.0628	78.7516	2.14631	0.554463
RUES-GLR RefChem2 P1 2021-01-25	E	13	5	SB431542		5441	324.79	256.963	179.647	47.4017	308.232	287.887	95.839	47.7783	264.068	263.537	48.3653	43.1733	17.4416	3.36335	0.551369
RUES-GLR RefChem2 P1 2021-01-25	E	15	5	Aspirin	100	5928	718.015	715.831	328.921	334.857	298.068	286.292	77.3816	43.5536	248.17	250.114	41.9933	39.8827	78.2557	1.61943	0.219298
RUES-GLR RefChem2 P1 2021-01-25	E	16	5	Aspirin	24.3	6203	780.407	768.085	387.006	418.003	296.976	281.852	86.514	42.5373	245.89	247.175	45.4589	36.0776	77.9623	2.17637	0.435273
RUES-GLR RefChem2 P1 2021-01-25	E	17	5	Aspirin	5.93	4776	656.515	641.486	318.08	352.754	295.89	280.044	88.4663	43.8516	247.701	247.761	50.2098	38.4342	72.9271	2.03099	0.565327
RUES-GLR RefChem2 P1 2021-01-25	E	18	5	Aspirin	14.4	4795	680.139	670.259	333.817	367.237	296.288	279.407	92.8692	40.69	245.395	245.325	49.8978	37.9798	73.4932	2.73201	0.583942
RUES-GLR RefChem2 P1 2021-01-25	E	19	5	Aspirin	0.351	5493	859.315	836.317	433.378	448.876	298.725	281.067	88.5366	43.7189	252.133	246.573	61.0717	40.0213	80.7209	2.47588	2.33024
RUES-GLR RefChem2 P1 2021-01-25	E	20	5	Aspirin	8.55	4835	665.202	659.357	304.197	325.606	295.581	282.966	81.3841	41.1674	247.817	248.78	48.8961	37.5024	75.636	1.69597	0.41365
RUES-GLR RefChem2 P1 2021-01-25	E	21	5	Aspirin	2.08	5136	801.073	787.923	406.751	429.094	289.369	277.523	74.407	39.8856	241.66	242.824	41.8859	36.1829	78.2321	1.53816	0.408878
RUES-GLR RefChem2 P1 2021-01-25	E	22	5	Aspirin	0.506	4606	611.028	581.394	319	365.178	291.688	272.642	91.775	43.4728	238.97	239.495	47.0771	36.6262	66.5219	2.88754	0.651324
RUES-GLR RefChem2 P1 2021-01-25	E	23	5	Aspirin	0.0123	4551	653.544	636.825	330.858	378.994	291.186	277.162	79.6288	44.223	242.403	244.545	43.2545	37.8834	71.1492	2.24127	0.593276
RUES-GLR RefChem2 P1 2021-01-25	E	24	5	Aspirin	0.003	5939	738.023	723.151	340.576	350.309	302.58	283.576	88.9559	49.3839	242.673	242.886	46.5318	38.297	79.9293	2.40781	0.353595
RUES-GLR RefChem2 P1 2021-01-25	F	1	5	Pomalidomide	100	4684	337.616	246.588	232.075	53.106	277.463	254.919	105.042	36.6603	377.721	370.734	84.8099	64.6021	18.1896	2.79675	10.3117
RUES-GLR RefChem2 P1 2021-01-25	F	2	5	Pomalidomide	24.3	4949	359.316	252.885	261.902	63.6969	270.217	255.063	84.28	35.2058	271.625	270.892	52.919	42.7849	21.0346	2.06102	0.949687
RUES-GLR RefChem2 P1 2021-01-25	F	3	5	Pomalidomide	5.93	4525	305.004	246.109	159.123	50.3743	280.218	262.107	91.9802	40.0954	247.158	242.422	56.7803	40.3341	15.558	2.60773	1.10497
RUES-GLR RefChem2 P1 2021-01-25	F	4	5	Pomalidomide	1.44	5063	344.409	254.83	220.352	53.3944	284.185	267.437	98.1619	37.2192	243.331	242.329	55.0703	38.3178	19.9684	2.5874	0.711041
RUES-GLR RefChem2 P1 2021-01-25	F	5	5	Pomalidomide	0.351	4969	356.758	258.448	224.05	66.926	273.742	258.041	89.4978	36.3489	234.914	234.328	49.2355	35.2132	23.5259	2.09298	0.503119
RUES-GLR RefChem2 P1 2021-01-25	F	6	5	Pomalidomide	0.0855	4217	472.548	296.045	335.792	124.81	290.933	266.275	103.112	38.2451	241.223	239.49	49.4029	36.2481	36.6374	4.10244	0.782547
RUES-GLR RefChem2 P1 2021-01-25	F	7	5	Pomalidomide	0.0208	4632	601.539	503.499	382.545	375.605	285.334	269.06	94.9319	40.2237	242.215	241.025	53.7293	39.5669	56.2392	2.46114	0.928325
RUES-GLR RefChem2 P1 2021-01-25	F	8	5	Pomalidomide	0.00506	4456	683.603	646.297	380.349	439.721	302.516	279.135	111.637	43.756	244.235	241.365	55.8544	38.7188	69.7487	3.85996	0.830341
RUES-GLR RefChem2 P1 2021-01-25	F	9	5	Pomalidomide	0.00123	5948	749.94	741.09	378.153	415.751	304.188	285.026	99.4513	45.693	246.88	247.927	49.5306	37.6454	75.807	3.14391	0.336247
RUES-GLR RefChem2 P1 2021-01-25	F	10	5	Pomalidomide	0.0003	4913	1743.36	1705.32	1129.34	1273.76	301.114	279.773	109.496	44.7493	267.974	246.55	112.982	41.6151	81.5795	3.43985	5.21067
RUES-GLR RefChem2 P1 2021-01-25	F	11	5	DEControl		5484	1034.58	1021.87	577.477	631.276	324.551	298.247	111.263	54.3595	250.514	251.147	47.529	40.4446	79.7775	5.37929	0.492341
RUES-GLR RefChem2 P1 2021-01-25	F	12	5	DMSOControl		5213	877.237	871.272	459.595	504.37	305.841	290.341	92.2109	45.0384	254.573	254.512	53.2008	38.5031	79.0907	2.53213	0.633033
RUES-GLR RefChem2 P1 2021-01-25	F	13	5	SB431542		4287	323.659	255.914	212.621	41.2059	314.967	286.711	110.979	54.7465	264.377	262.766	55.4473	43.1466	14.7189	4.92186	0.769769
RUES-GLR RefChem2 P1 2021-01-25	F	15	5	ATRA	100	1503	299.322	290.504	75.125	87.5638	542.93	498.059	208.644	220.166	700.432	686.678	243.879	274.911	7.5183	45.7751	83.3001
RUES-GLR RefChem2 P1 2021-01-25	F	16	5	ATRA	24.3	1159	319.132	314.462	66.5033	68.3745	570.595	549.764	198.582	203.709	605.471	583.708	202.882	207.34	7.16135	52.459	75.755
RUES-GLR RefChem2 P1 2021-01-25	F	17	5	ATRA	5.93	4359	244.384	244.326	34.6341	29.9115	319.37	300.879	98.6066	52.5938	269.724	266.629	60.2593	42.303	0.298234	2.38587	1.72058
RUES-GLR RefChem2 P1 2021-01-25	F	18	5	ATRA	14.4	1296	330.889	328.407	69.657	74.8416	598.925	587.702	199.896	209.8	619.062	607.888	203.292	213.599	9.9537	60.571	77.0833
RUES-GLR RefChem2 P1 2021-01-25	F	19	5	ATRA	0.351	5802	313.075	261.945	141.594	56.6427	299.087	283.889	87.7114	41.6121	253.316	254.207	51.0771	38.1896	14.9087	1.84419	0.551534
RUES-GLR RefChem2 P1 2021-01-25	F	20	5	ATRA	8.55	1595	290.026	285.629	57.8181	60.4323	452.675	420.222	165.022	140.389	442.578	427.341	132.056	130.014	1.81818	24.2633	43.8871
RUES-GLR RefChem2 P1 2021-01-25	F	21	5	ATRA	2.08	4288	244.794	240.998	56.0877	31.3221	297.059	274.563	100.896	48.6011	245.251	243.15	56.6343	37.9249	1.37593	3.03172	1.02612
RUES-GLR RefChem2 P1 2021-01-25	F	22	5	ATRA	0.506	4372	286.431	245.655	134.357	44.2578	298.008	272.898	111.822	50.6137	244.483	240.48	64.4109	37.2525	9.83532	3.15645	1.64684
RUES-GLR RefChem2 P1 2021-01-25	F	23	5	ATRA	0.0123	4983	617.491	592.566	318.196	393.07	301.558	276.404	101.141	46.4187	239.801	239	51.8501	35.2607	66.6466	3.61228	0.883002
RUES-GLR RefChem2 P1 2021-01-25	F	24	5	ATRA	0.003	5692	631.419	606.292	347.12	419.342	314.448	286.538	108.219	55.7065	238.245	240.036	52.1329	36.2214	65.7414	4.58538	0.439213
RUES-GLR RefChem2 P1 2021-01-25	G	1	5	Saccharin	100	5777	875.393	860.963	472.547	502.716	285.754	269.156	89.4608	41.3304	229.31	228.925	47.6208	35.5972	78.1028	2.19837	0.536611
RUES-GLR RefChem2 P1 2021-01-25	G	2	5	Saccharin	24.3	5326	735.639	731.874	336.632	346.644	296.067	281.731	91.0536	37.6921	235.478	235.505	48.054	33.4319	79.6658	2.38453	0.488171
RUES-GLR RefChem2 P1 2021-01-25	G	3	5	Saccharin	5.93	5256	873.939	873.14	418.401	427.046	293.423	276.047	94.3162	42.8227	234.427	234.487	46.7961	36.0035	82.1157	2.47336	0.437595
RUES-GLR RefChem2 P1 2021-01-25	G	4	5	Saccharin	1.44	5568	771.677	761.654	378.18	395.825	296.271	280.813	88.8468	43.5729	235.902	235.442	47.5366	37.3104	78.6458	2.13721	0.448994
RUES-GLR RefChem2 P1 2021-01-25	G	5	5	Saccharin	0.351	4976	863.799	870.231	445.807	478.353	300.447	281.575	92.1321	44.7441	239.343	239.684	44.7887	36.6202	78.4365	2.63264	0.422026
RUES-GLR RefChem2 P1 2021-01-25	G	6	5	Saccharin	0.0855	4333	699.544	669.789	365.188	394.047	291.084	268.933	110.976	43.6359	234.963	231.206	59.6274	35.787	73.6441	2.60789	0.853912
RUES-GLR RefChem2 P1 2021-01-25	G	7	5	Saccharin	0.0208	4476	847.15	832.692	448.355	452.535	293.691	276.125	89.4517	44.1741	240.784	240.75	48.5238	38.0146	78.1278	2.61394	0.781948
RUES-GLR RefChem2 P1 2021-01-25	G	8	5	Saccharin	0.00506	5265	917.189	902.8	485.577	506.6	292.677	281.3	79.8701	42.6277	244.417	244.211	43.9415	40.045	80.1899	1.74739	0.512821
RUES-GLR RefChem2 P1 2021-01-25	G	9	5	Saccharin	0.00123	4704	829.43	812.567	424.636	450.272	300.385	283.593	89.3901	45.9851	246.766	248.048	47.0063	39.4171	78.6777	2.52976	0.42517
RUES-GLR RefChem2 P1 2021-01-25	G	10	5	Saccharin	0.0003	5690	810.538	796.654	406.414	443.934	293.607	280.554	83.3475	41.862	249.615	249.01	46.9952	39.4246	78.8928	1.88049	0.386643
RUES-GLR RefChem2 P1 2021-01-25	G	11	5	DEControl		4949	623.606	612.566	294.851	308.903	317.971	290.698	111.536	51.424	246.683	244.822	52.4165	40.9212	72.0145	4.70802	0.585977
RUES-GLR RefChem2 P1 2021-01-25	G	12	5	DMSOControl		5558	651.218	636.687	316.024	341.089	298.985	285.576	88.2318	43.8598	248.189	249.416	49.2879	38.2333	72.4541	2.06909	0.467794
RUES-GLR RefChem2 P1 2021-01-25	G	13	5	SB431542		5196	308.891	252.365	167.539	40.3734	306.736	283.06	98.013	47.0992	265.635	265.699	47.9815	40.5343	14.4534	3.50269	0.538876
RUES-GLR RefChem2 P1 2021-01-25	G	15	5	Caffeine	100	4199	682.25	671.242	330.324	356.346	293.57	278.717	98.0096	41.7737	249.119	248.614	56.7814	38.4379	73.9938	2.16718	0.690641
RUES-GLR RefChem2 P1 2021-01-25	G	16	5	Caffeine	24.3	5284	767.298	753.061	367.541	379.026	286.199	277.089	70.0811	39.429	244.306	245.673	41.0639	38.7196	79.7502	1.38153	0.340651
RUES-GLR RefChem2 P1 2021-01-25	G	17	5	Caffeine	5.93	4667	641.045	632.934	316.8	370.287	291.816	277.558	83.9976	44.6648	243.019	243.99	45.0628	38.7893	70.1521	2.1427	0.557103
RUES-GLR RefChem2 P1 2021-01-25	G	18	5	Caffeine	14.4	4167	819.701	822.483	400.48	409.193	294.23	278.471	94.0684	41.0725	246.976	247.399	48.3157	38.598	79.6976	2.75978	0.431965
RUES-GLR RefChem2 P1 2021-01-25	G	19	5	Caffeine	0.351	5729	696.262	690.214	317.613	324.821	297.571	287.566	71.8198	42.8012	248.921	252.005	38.4548	37.2192	77.8146	1.57095	0.174551
RUES-GLR RefChem2 P1 2021-01-25	G	20	5	Caffeine	8.55	5182	711.88	701.913	331.977	347.759	290.039	275.597	90.0544	37.6447	242.356	241.366	52.6727	37.2926	77.7499	1.85257	0.810498
RUES-GLR RefChem2 P1 2021-01-25	G	21	5	Caffeine	2.08	4984	673.262	665.745	310.537	344.53	291.279	276.108	92.7992	43.9939	242.94	241.927	56.0597	38.5824	75	2.30738	0.62199
RUES-GLR RefChem2 P1 2021-01-25	G	22	5	Caffeine	0.506	5412	711.607	706.756	327.389	343.968	290.047	277.295	81.8509	45.0154	249.927	242.417	65.3602	39.091	77.864	1.81079	2.49446
RUES-GLR RefChem2 P1 2021-01-25	G	23	5	Caffeine	0.0123	4607	656.568	639.766	318.06	349.24	292.384	278.016	84.4359	43.5706	241.23	242.359	47.6196	37.8078	73.2147	2.19232	0.477534
RUES-GLR RefChem2 P1 2021-01-25	G	24	5	Caffeine	0.003	5786	715.761	711.706	346.087	370.573	300.365	279.935	91.1791	48.0585	238.201	238.748	44.4663	36.7781	76.374	2.52333	0.345662
RUES-GLR RefChem2 P1 2021-01-25	H	1	5	Thalidomide	100	4410	421.495	297.459	250.664	132.622	291.393	275.163	92.4738	40.4594	236.359	235.865	46.8233	36.5772	37.1655	2.72109	0.31746
RUES-GLR RefChem2 P1 2021-01-25	H	2	5	Thalidomide	24.3	4967	535.109	373.251	371.097	229.533	297.151	271.217	122.943	38.8797	239.158	236.733	57.078	34.0613	45.8627	4.06684	1.02678
RUES-GLR RefChem2 P1 2021-01-25	H	3	5	Thalidomide	5.93	4012	510.176	370.993	332.076	225.751	304.455	267.709	135.796	45.7086	237.963	232.415	65.6084	37.6884	46.2861	6.08175	1.39581
RUES-GLR RefChem2 P1 2021-01-25	H	4	5	Thalidomide	1.44	5505	541.424	500.583	292.702	348.235	296.211	280.08	86.6229	40.4468	239.24	240.197	40.2625	36.6543	58.02	2.76113	0.345141
RUES-GLR RefChem2 P1 2021-01-25	H	5	5	Thalidomide	0.351	4929	605.431	561.159	354.701	424.658	287.707	270.649	96.2982	44.5981	234.664	232.769	51.1963	37.5943	60.6005	2.43457	0.730371
RUES-GLR RefChem2 P1 2021-01-25	H	6	5	Thalidomide	0.0855	3073	577.545	535.613	326.543	397.43	298.185	271.525	115.288	44.5077	234.798	231.451	60.1763	38.9212	61.3732	4.16531	0.846079
RUES-GLR RefChem2 P1 2021-01-25	H	7	5	Thalidomide	0.0208	4701	883.884	849.833	470.947	497.927	292.18	278.71	94.1348	40.1073	241.585	242.058	53.0234	37.5113	79.6852	1.87194	0.659434
RUES-GLR RefChem2 P1 2021-01-25	H	8	5	Thalidomide	0.00506	5632	776.137	759.247	393.123	428.548	299.433	284.851	88.2835	42.1029	248.489	249.924	47.3784	37.9205	77.2195	2.37926	0.497159
RUES-GLR RefChem2 P1 2021-01-25	H	9	5	Thalidomide	0.00123	4795	767.177	750.442	374.21	393.779	291.908	276.349	99.7095	45.8405	247.311	246.036	59.6554	42.1444	78.3733	2.21064	0.792492
RUES-GLR RefChem2 P1 2021-01-25	H	10	5	Thalidomide	0.0003	5730	698.675	691.426	317.453	330.698	296.175	281.009	91.4414	44.5039	252.072	250.006	55.0121	39.3638	77.801	2.00698	0.663176
RUES-GLR RefChem2 P1 2021-01-25	H	11	5	DEControl		4442	751.862	749.148	348.883	347.538	306.68	288.498	97.3512	48.1133	248.334	249.032	51.6349	39.4527	80.2116	3.21927	0.56281
RUES-GLR RefChem2 P1 2021-01-25	H	12	5	DMSOControl		5164	707.835	695.585	338.619	359.688	299.757	284.183	90.3589	43.478	248.377	249.741	47.9122	37.5987	76.3362	2.4206	0.52285
RUES-GLR RefChem2 P1 2021-01-25	H	13	5	SB431542		4863	314.477	250.963	174.678	46.9791	301.837	279.043	100.341	49.4432	263.144	262.826	49.8846	41.3215	16.1423	3.33128	0.65803
RUES-GLR RefChem2 P1 2021-01-25	H	15	5	Folic Acid	100	5834	657.81	630.058	327.158	360.966	298.155	286.271	75.0104	40.7174	254.318	256.474	39.1718	39.3378	72.1632	1.93692	0.222832
RUES-GLR RefChem2 P1 2021-01-25	H	16	5	Folic Acid	24.3	5932	657.355	646.217	310.89	340.833	299.176	286.165	78.1868	42.9354	287.085	254.472	1056.25	39.0361	73.4154	2.0735	0.606878
RUES-GLR RefChem2 P1 2021-01-25	H	17	5	Folic Acid	5.93	5700	790.484	788.265	365.816	376.504	290.589	279.021	80.2392	38.9679	247.186	248.306	44.6529	39.4579	80.8246	1.89474	0.421053
RUES-GLR RefChem2 P1 2021-01-25	H	18	5	Folic Acid	14.4	3885	657.952	635.931	360.799	432.477	299.75	278.029	104.155	42.8812	247.673	246.419	57.7005	35.5631	67.0785	3.2175	0.952381
RUES-GLR RefChem2 P1 2021-01-25	H	19	5	Folic Acid	0.351	3769	621.516	594.417	297.97	306.759	297.052	282.372	94.5063	42.3949	252.651	251.67	59.7832	39.1169	72.433	2.12258	0.795967
RUES-GLR RefChem2 P1 2021-01-25	H	20	5	Folic Acid	8.55	5144	784.665	774.565	381.234	406.386	297.466	280.815	95.3502	38.174	248.576	249.097	53.2775	35.6736	79.374	2.60498	0.680404
RUES-GLR RefChem2 P1 2021-01-25	H	21	5	Folic Acid	2.08	5889	691.96	682.061	319.777	334.516	294.879	280.522	89.9267	41.9754	244.362	246.477	46.1948	37.1362	76.6514	2.13958	0.339616
RUES-GLR RefChem2 P1 2021-01-25	H	22	5	Folic Acid	0.506	4132	593.298	557.062	302.389	349.02	291.181	274.298	91.4188	43.3142	241.945	242.035	48.2367	36.4282	65.6341	2.22652	0.798645
RUES-GLR RefChem2 P1 2021-01-25	H	23	5	Folic Acid	0.0123	5578	721.585	718.145	310.853	303.499	291.473	281.769	72.1996	41.2089	242.066	243.927	40.7902	37.9375	80.943	1.27286	0.233058
RUES-GLR RefChem2 P1 2021-01-25	H	24	5	Folic Acid	0.003	5843	775.46	760.454	379.271	401.764	293.024	276.796	85.5578	43.4342	239.437	241.004	41.488	35.9516	78.9663	2.25911	0.239603
RUES-GLR RefChem2 P1 2021-01-25	I	1	5	Aspirin	100	5069	1077.14	1068.21	605.36	650.721	296.703	275.305	104.466	45.1852	229.908	228.486	50.4794	34.9894	80.292	2.93944	0.591833
RUES-GLR RefChem2 P1 2021-01-25	I	2	5	Aspirin	24.3	4536	860.254	845.982	449.406	474.529	291.58	273.633	93.0663	44.3876	236.467	236.168	51.8734	36.5572	79.0344	2.20459	0.617284
RUES-GLR RefChem2 P1 2021-01-25	I	3	5	Aspirin	5.93	3969	843.361	813.592	504.858	591.334	295.666	273.555	100.824	47.8316	238.08	236.187	50.9357	38.4868	72.6127	3.65331	0.856639
RUES-GLR RefChem2 P1 2021-01-25	I	4	5	Aspirin	1.44	4142	968.468	925.437	610.579	698.431	286.599	263.284	102.531	41.965	232.637	231.222	49.6345	36.5179	74.4085	3.01787	0.555287
RUES-GLR RefChem2 P1 2021-01-25	I	5	5	Aspirin	0.351	4631	1077.45	1041.4	650.193	714.332	294.13	273.375	103.073	44.0347	234.143	232.578	48.8577	36.979	78.6655	3.34701	0.647808
RUES-GLR RefChem2 P1 2021-01-25	I	6	5	Aspirin	0.0855	4753	734.802	720.923	358.228	385.713	289.991	279.372	78.4859	44.1311	242.164	242.078	48.1496	38.6707	77.5931	1.40964	0.568062
RUES-GLR RefChem2 P1 2021-01-25	I	7	5	Aspirin	0.0208	4651	783.996	740.723	392.529	390.272	279.437	267.183	80.4216	38.5624	236.206	235.685	46.2362	36.1428	80.4988	1.69856	0.58052
RUES-GLR RefChem2 P1 2021-01-25	I	8	5	Aspirin	0.00506	5403	625.918	610.79	296.783	328.805	311.151	292.922	100.129	48.3253	250.999	250.672	54.8076	41.2711	71.5528	3.23894	0.573755
RUES-GLR RefChem2 P1 2021-01-25	I	9	5	Aspirin	0.00123	4880	678.205	669.435	301.56	302.797	288.696	277.344	77.6864	39.4031	248.886	249.419	47.0477	38.6595	78.0943	1.53689	0.512295
RUES-GLR RefChem2 P1 2021-01-25	I	10	5	Aspirin	0.0003	4851	675.515	661.588	305.196	329.941	304.192	292.744	82.6377	44.9865	250.453	251.364	49.0795	39.4757	76.8707	1.75222	0.700886
RUES-GLR RefChem2 P1 2021-01-25	I	11	5	DEControl		5370	785.042	781.582	372.078	376.531	303.096	287.076	81.01	49.0852	244.831	245.733	41.8577	38.6581	80.298	2.14153	0.260708
RUES-GLR RefChem2 P1 2021-01-25	I	12	5	DMSOControl		5335	719.091	719.792	348.324	375.697	303.011	288.463	90.6954	42.6455	250.018	251.054	51.253	39.0724	75.6514	2.58669	0.54358
RUES-GLR RefChem2 P1 2021-01-25	I	13	5	SB431542		4889	281.86	249.434	127.503	35.9545	330.376	298.04	118.826	54.5434	284.265	284.363	52.927	47.3542	9.18388	6.21804	0.797709
RUES-GLR RefChem2 P1 2021-01-25	I	15	5	Lenalidomide	100	4294	430.541	324.949	241.697	158.55	283.367	269.137	82.7915	36.0124	246.344	245.583	49.855	36.9056	39.986	2.07266	0.838379
RUES-GLR RefChem2 P1 2021-01-25	I	16	5	Lenalidomide	24.3	4573	437.02	327.118	247.462	160.054	282.461	273.357	78.1274	38.6351	252.117	252.748	47.3695	41.0873	40.8047	1.24645	0.634157
RUES-GLR RefChem2 P1 2021-01-25	I	17	5	Lenalidomide	5.93	3794	416.248	320.749	227.854	150.416	282.779	268.924	87.0977	41.3164	246.986	246.729	53.7931	37.956	38.5609	1.97681	0.975224
RUES-GLR RefChem2 P1 2021-01-25	I	18	5	Lenalidomide	14.4	4311	430.462	313.993	248.974	143.213	283.578	270.377	79.202	38.6766	249.753	248.607	46.8716	38.8723	38.0422	1.43818	0.649501
RUES-GLR RefChem2 P1 2021-01-25	I	19	5	Lenalidomide	0.351	4993	523.01	463.552	289.952	312.593	287.168	273.433	81.3953	38.9316	240.607	241.806	43.9862	36.9597	54.3761	1.76247	0.440617
RUES-GLR RefChem2 P1 2021-01-25	I	20	5	Lenalidomide	8.55	3910	374.507	269	214.74	87.9656	283.233	266.358	84.1452	40.2889	243.177	241.481	51.8972	37.8159	29.3862	1.96931	0.716113
RUES-GLR RefChem2 P1 2021-01-25	I	21	5	Lenalidomide	2.08	4496	424.416	327.662	238.332	160.979	279.979	266.697	81.9382	36.3697	240.97	240.605	47.2368	35.1369	39.5907	1.69039	0.645018
RUES-GLR RefChem2 P1 2021-01-25	I	22	5	Lenalidomide	0.506	4413	460.308	392.902	251.082	236.954	284.841	264.68	100.31	41.8953	241.723	237.194	63.8708	38.9657	46.9069	2.92318	1.24632
RUES-GLR RefChem2 P1 2021-01-25	I	23	5	Lenalidomide	0.0123	5043	648.998	642.678	329.174	390.88	302.253	282.153	91.0082	45.1155	245.027	246.171	43.8329	37.3778	69.4824	3.01408	0.436248
RUES-GLR RefChem2 P1 2021-01-25	I	24	5	Lenalidomide	0.003	5532	712.248	693.122	354.644	387.661	292.032	275.628	85.3885	45.1785	237.764	238.44	42.3438	36.8611	75.0904	2.09689	0.289226
RUES-GLR RefChem2 P1 2021-01-25	J	1	5	ATRA	100	1161	326.063	322.207	68.3927	69.915	647.049	625.496	220.978	241.51	684.934	663.696	230.532	224.243	9.56072	66.3221	85.0129
RUES-GLR RefChem2 P1 2021-01-25	J	2	5	ATRA	24.3	1670	320.235	316.883	67.8709	71.511	621.011	598.802	221.689	230.766	650.589	634.239	220.211	229.349	7.60479	61.9162	80.5389
RUES-GLR RefChem2 P1 2021-01-25	J	3	5	ATRA	5.93	2687	251.6	242.604	64.5437	37.5261	366.544	313.905	182.66	76.5452	306.406	279.771	116.117	59.4775	1.89803	9.45292	9.45292
RUES-GLR RefChem2 P1 2021-01-25	J	4	5	ATRA	1.44	3885	255.856	237.679	114.92	32.5119	292.068	267.521	107.083	44.0747	238.971	235.273	54.0538	36.4127	3.57786	2.67696	0.952381
RUES-GLR RefChem2 P1 2021-01-25	J	5	5	ATRA	0.351	4949	334.983	258.423	190.429	61.1869	301.792	276.267	106.19	50.9481	237.836	236.95	48.4985	39.1006	19.317	4.08163	0.72742
RUES-GLR RefChem2 P1 2021-01-25	J	6	5	ATRA	0.0855	4511	501.745	350.755	341.887	196.657	313.903	283.008	116.528	50.7064	242.224	240.787	51.5999	38.9509	43.8705	5.00998	0.820217
RUES-GLR RefChem2 P1 2021-01-25	J	7	5	ATRA	0.0208	5531	620.359	581.339	351.425	433.916	301.588	277.325	104.826	47.5025	238.489	237.714	48.6832	38.7937	63.2074	3.85102	0.650877
RUES-GLR RefChem2 P1 2021-01-25	J	8	5	ATRA	0.00506	5634	703.386	674.888	393.878	469.207	303.894	281.203	104.928	43.5173	243.358	242.254	54.0427	38.3126	69.3291	4.11786	0.763223
RUES-GLR RefChem2 P1 2021-01-25	J	9	5	ATRA	0.00123	5726	716.536	709.83	337.972	354.585	296.134	276.834	100.187	41.8382	244.591	244.051	55.2237	37.6529	76.9647	2.56724	0.558854
RUES-GLR RefChem2 P1 2021-01-25	J	10	5	ATRA	0.0003	4469	786.297	768.121	414.951	468.307	306.301	287.115	93.6143	48.06	247.163	248.34	43.8886	37.4431	75.7216	3.26695	0.559409
RUES-GLR RefChem2 P1 2021-01-25	J	11	5	DEControl		5497	806.234	795.642	383.557	401.174	300.203	284.565	95.1348	43.4921	246.362	247.385	47.8306	37.0012	80.6258	2.65599	0.509369
RUES-GLR RefChem2 P1 2021-01-25	J	12	5	DMSOControl		4730	834.86	829.167	439.731	486.197	301.482	285.284	98.0188	43.7078	245.728	247.47	49.857	37.4549	76.9979	2.55814	0.338266
RUES-GLR RefChem2 P1 2021-01-25	J	13	5	SB431542		5189	416.421	264.106	397.229	49.9621	311.046	281.43	109.867	51.7427	256.596	256.782	44.5144	43.2282	19.946	4.97206	0.327616
RUES-GLR RefChem2 P1 2021-01-25	J	15	5	Pomalidomide	100	4196	307.706	253.653	160.876	44.1029	280.292	264.582	89.9656	35.976	381.742	380.365	74.0257	64.9742	13.918	2.16873	13.7989
RUES-GLR RefChem2 P1 2021-01-25	J	16	5	Pomalidomide	24.3	3425	311.779	256.327	164.458	46.9095	276.081	266.006	79.1157	36.3029	291.702	293.546	54.7442	48.0674	14.7737	1.69343	1.08029
RUES-GLR RefChem2 P1 2021-01-25	J	17	5	Pomalidomide	5.93	4857	318.024	256.68	170.891	53.7294	280.866	267.936	84.5121	37.3511	255.493	256.649	48.6266	41.6092	16.2858	2.0383	0.53531
RUES-GLR RefChem2 P1 2021-01-25	J	18	5	Pomalidomide	14.4	4495	312.181	254.781	168.871	48.1593	285.334	267.643	95.3638	38.4913	268.299	266.523	58.3658	42.5032	14.772	2.38042	0.956618
RUES-GLR RefChem2 P1 2021-01-25	J	19	5	Pomalidomide	0.351	3974	345.739	263.825	198.08	66.1025	282.094	265.385	91.7927	37.6929	246.537	246.878	50.9552	39.0821	21.5148	2.86865	0.956215
RUES-GLR RefChem2 P1 2021-01-25	J	20	5	Pomalidomide	8.55	3774	297.857	250.794	135.714	46.974	286.02	267.929	99.508	40.2674	263.382	261.748	60.6699	42.5143	14.017	2.57022	1.11288
RUES-GLR RefChem2 P1 2021-01-25	J	21	5	Pomalidomide	2.08	4290	339.908	257.685	199.617	57.8622	279.758	265.464	97.1956	36.0746	249.124	246.614	60.2791	40.0917	20.4196	2.0979	0.862471
RUES-GLR RefChem2 P1 2021-01-25	J	22	5	Pomalidomide	0.506	3962	389.799	272.839	239.388	84.7439	291.426	269.466	103.694	40.7344	247.011	246.346	54.7471	34.5653	29.4296	3.58405	0.807673
RUES-GLR RefChem2 P1 2021-01-25	J	23	5	Pomalidomide	0.0123	4707	532.729	489.175	287.109	327.833	291.046	274.037	84.307	41.2949	241.612	241.787	44.4297	38.3015	57.5313	2.46441	0.573614
RUES-GLR RefChem2 P1 2021-01-25	J	24	5	Pomalidomide	0.003	5565	646.48	636.786	316.19	362.079	293.156	276.504	86.4995	44.6589	241.144	242.375	42.2113	36.5757	71.3926	2.13836	0.32345
RUES-GLR RefChem2 P1 2021-01-25	K	1	5	Caffeine	100	5067	898.159	874.75	500.15	545.923	303.918	280.622	98.6547	47.3706	233.64	232.777	49.5892	34.469	77.5804	2.9406	0.927571
RUES-GLR RefChem2 P1 2021-01-25	K	2	5	Caffeine	24.3	5722	839.873	829.574	441.268	491.433	297.775	279.543	92.5354	47.3179	233.218	233.559	40.9108	35.509	77.5253	2.56903	0.332052
RUES-GLR RefChem2 P1 2021-01-25	K	3	5	Caffeine	5.93	4722	856.784	829	489.822	528.685	292.453	272.99	91.1986	45.3676	232.622	233.435	43.5156	35.4779	75.7518	2.64718	0.465904
RUES-GLR RefChem2 P1 2021-01-25	K	4	5	Caffeine	1.44	4987	839.555	817.702	442.237	460.937	290.521	269.019	100.68	42.0035	230.642	230.321	48.3904	34.2065	78.3838	3.12813	0.481251
RUES-GLR RefChem2 P1 2021-01-25	K	5	5	Caffeine	0.351	5752	680.498	659.348	315.512	326.673	295.324	282.24	85.7317	39.171	238.456	238.254	48.3567	36.3986	76.9819	1.92976	0.486787
RUES-GLR RefChem2 P1 2021-01-25	K	6	5	Caffeine	0.0855	3775	750.178	725.695	407.687	444.773	285.595	264.759	103.338	41.6077	235.513	232.075	56.6835	37.025	74.2781	2.72848	0.821192
RUES-GLR RefChem2 P1 2021-01-25	K	7	5	Caffeine	0.0208	3894	713.208	671.37	403.735	467.364	292.344	275.435	90.1291	41.9346	237.785	237.418	49.273	38.2229	70.5958	2.43965	0.436569
RUES-GLR RefChem2 P1 2021-01-25	K	8	5	Caffeine	0.00506	4162	730.215	711.732	389.047	439.268	293.958	274.538	98.5296	42.3082	240.255	240.405	54.2404	37.2511	73.1139	2.59491	0.6247
RUES-GLR RefChem2 P1 2021-01-25	K	9	5	Caffeine	0.00123	4335	638.007	614.247	314.614	331.644	293.848	278.546	86.1645	44.3594	242.014	240.849	47.1457	40.4424	71.6263	2.21453	0.530565
RUES-GLR RefChem2 P1 2021-01-25	K	10	5	Caffeine	0.0003	4888	709.914	703.071	344.648	366.927	293.224	279.433	82.9455	42.349	264.143	247.702	383.241	40.75	75.5319	2.20949	0.859247
RUES-GLR RefChem2 P1 2021-01-25	K	11	5	DEControl		4863	825.656	822.01	423.494	465.216	311.197	289.16	105.03	48.2097	249.405	247.926	53.7835	38.8441	77.8532	3.94818	0.65803
RUES-GLR RefChem2 P1 2021-01-25	K	12	5	DMSOControl		4642	634.984	605.563	314.774	350.815	294.388	283.947	78.9483	41.7248	246.899	246.747	55.568	39.8152	70.3361	1.65877	0.624731
RUES-GLR RefChem2 P1 2021-01-25	K	13	5	SB431542		4182	353.217	256.154	274.771	44.0933	313.071	277.909	131.296	49.6071	259.865	256.983	68.503	38.4194	16.7862	5.49976	1.53037
RUES-GLR RefChem2 P1 2021-01-25	K	15	5	Saccharin	100	4794	619.926	606.302	306.285	349.809	297.102	279.964	98.7956	41.4683	244.391	244.101	53.4091	38.1458	69.2532	2.46141	0.792657
RUES-GLR RefChem2 P1 2021-01-25	K	16	5	Saccharin	24.3	5466	683.165	677.673	309.961	318.186	293.256	281.278	77.2107	40.4564	252.235	252.795	43.8645	38.8775	77.3509	1.77461	0.475668
RUES-GLR RefChem2 P1 2021-01-25	K	17	5	Saccharin	5.93	4276	634.907	629.159	297.755	325.437	294.159	283.179	75.6992	38.8834	246.134	248.787	42.2785	37.3408	72.521	1.68382	0.350795
RUES-GLR RefChem2 P1 2021-01-25	K	18	5	Saccharin	14.4	5470	726.538	725.371	334.553	335.321	289.437	281.315	70.3162	40.0902	245.152	246.688	41.2478	37.9864	78.5009	1.33455	0.402194
RUES-GLR RefChem2 P1 2021-01-25	K	19	5	Saccharin	0.351	4982	659.02	616.755	339.955	368.881	286.991	272.733	87.5789	40.5417	242.705	243.067	48.6921	37.9686	71.7784	2.04737	0.541951
RUES-GLR RefChem2 P1 2021-01-25	K	20	5	Saccharin	8.55	4605	638.684	627.323	311.33	349.99	289.545	276.988	78.4726	43.6818	246.817	247.743	41.7563	40.0821	71.0315	1.99783	0.304017
RUES-GLR RefChem2 P1 2021-01-25	K	21	5	Saccharin	2.08	4181	712.188	691.037	359.588	367.774	285.952	270.775	79.902	42.5684	235.067	235.981	41.5908	35.9486	75.5322	1.91342	0.430519
RUES-GLR RefChem2 P1 2021-01-25	K	22	5	Saccharin	0.506	4876	603.837	591.843	282.897	311.032	306.03	289.236	90.4134	44.0636	247.041	247.367	49.8306	36.684	70.3651	2.58409	0.615258
RUES-GLR RefChem2 P1 2021-01-25	K	23	5	Saccharin	0.0123	4754	622.889	598.721	326.099	383.99	304.679	281.98	98.2137	47.3187	241.02	242.833	41.2062	35.8478	67.3748	3.5549	0.462768
RUES-GLR RefChem2 P1 2021-01-25	K	24	5	Saccharin	0.003	5766	759.777	750.801	369.635	394.472	304.872	286.052	89.8007	45.965	243.841	245.357	42.7371	37.2266	78.1651	3.01769	0.381547
RUES-GLR RefChem2 P1 2021-01-25	L	1	5	Folic Acid	100	5093	853.664	843.167	464.004	489.218	303.39	281.473	98.1784	46.7642	241.742	240.828	47.3405	37.8374	76.8702	2.96485	0.49087
RUES-GLR RefChem2 P1 2021-01-25	L	2	5	Folic Acid	24.3	5467	876.182	856.668	475.319	518.056	308.867	287.511	100.487	47.9888	234.677	235.897	40.5241	33.3956	78.233	3.84123	0.256082
RUES-GLR RefChem2 P1 2021-01-25	L	3	5	Folic Acid	5.93	5123	1044.47	1009.46	619.522	696.733	302.856	283.289	96.8194	48.8917	234.868	234.04	49.44	35.108	78.2354	3.10365	0.487995
RUES-GLR RefChem2 P1 2021-01-25	L	4	5	Folic Acid	1.44	4938	679.908	671.243	305.145	323.77	293.015	279.471	90.9984	39.684	237.968	237.76	53.7242	34.5431	77.4605	1.80235	0.708789
RUES-GLR RefChem2 P1 2021-01-25	L	5	5	Folic Acid	0.351	4440	821.223	813.921	432.411	465.831	289.103	270.293	95.9295	41.4364	232.655	232.589	45.5778	35.4786	76.9595	2.90541	0.540541
RUES-GLR RefChem2 P1 2021-01-25	L	6	5	Folic Acid	0.0855	3960	942.766	902.803	543.585	606.629	298.314	276.559	113.525	44.0006	243.23	241.007	64.7188	39.5461	77.2222	3.15657	1.06061
RUES-GLR RefChem2 P1 2021-01-25	L	7	5	Folic Acid	0.0208	3784	798.122	743.654	476.238	534.241	294.963	271.694	109.767	43.4024	240.261	238.573	56.1439	36.2473	72.3837	3.43552	0.951374
RUES-GLR RefChem2 P1 2021-01-25	L	8	5	Folic Acid	0.00506	4064	812.639	761.971	467.069	513.706	291.899	270.675	109.812	39.6818	245.61	242.165	65.2634	36.3126	74.7047	2.75591	1.37795
RUES-GLR RefChem2 P1 2021-01-25	L	9	5	Folic Acid	0.00123	3925	680.934	675.614	357.603	419.416	308.195	280.314	125.757	47.1363	248.662	245.195	71.2742	38.4542	70.4459	4.30573	1.17197
RUES-GLR RefChem2 P1 2021-01-25	L	10	5	Folic Acid	0.0003	4338	778.503	718.032	456.059	501.797	302.661	276.521	127.311	49.7227	243.92	239.931	68.4581	39.0369	73.029	4.35685	1.45228
RUES-GLR RefChem2 P1 2021-01-25	L	11	5	DEControl		4191	790.851	785.83	416.104	434.166	304.486	285.998	96.7939	46.7849	244.473	244.848	49.3596	38.1725	76.3302	3.17347	0.668098
RUES-GLR RefChem2 P1 2021-01-25	L	12	5	DMSOControl		3935	810.629	802.306	424.208	454.037	298.256	282.232	92.372	40.1192	247.994	247.488	50.501	38.2704	76.6963	2.51588	0.660737
RUES-GLR RefChem2 P1 2021-01-25	L	13	5	SB431542		3665	273.504	243.348	126.521	33.3066	298.873	270.01	114.716	42.091	263.927	258.026	66.6958	41.624	7.55798	3.73806	1.71896
RUES-GLR RefChem2 P1 2021-01-25	L	15	5	Thalidomide	100	4065	379.965	278.315	213.387	86.9456	296.645	275.679	97.0525	44.3935	247.275	248.069	45.7564	39.6269	28.6839	3.91144	0.639606
RUES-GLR RefChem2 P1 2021-01-25	L	16	5	Thalidomide	24.3	3285	423.369	308.835	257.631	133.646	288.999	268.242	110.608	41.0754	247.762	246.317	61.7518	38.8501	35.2816	3.379	1.2481
RUES-GLR RefChem2 P1 2021-01-25	L	17	5	Thalidomide	5.93	4237	413.423	315.5	225.15	139.771	293.882	276.799	93.0633	40.6484	246.917	247.177	52.7057	36.9049	36.3229	2.64338	0.684447
RUES-GLR RefChem2 P1 2021-01-25	L	18	5	Thalidomide	14.4	5017	416.856	310.828	234.062	134.5	280.932	268.2	78.4848	34.2644	244.356	245.261	46.8734	36.9849	36.8148	1.81383	0.378712
RUES-GLR RefChem2 P1 2021-01-25	L	19	5	Thalidomide	0.351	4236	546.488	504.259	288.433	341.806	295.797	274.262	104.025	38.4535	248.051	246.095	60.8391	36.8026	58.3097	3.2814	1.10954
RUES-GLR RefChem2 P1 2021-01-25	L	20	5	Thalidomide	8.55	3697	472.617	321.936	315.695	150.78	290.303	264.79	115.236	39.4994	248.068	245.957	59.3956	36.1532	39.8702	3.75981	1.3254
RUES-GLR RefChem2 P1 2021-01-25	L	21	5	Thalidomide	2.08	4394	473.422	405.308	260.395	249.118	285.603	270.335	87.5902	40.7018	244.217	244.687	48.7361	38.601	48.2931	2.23031	0.637233
RUES-GLR RefChem2 P1 2021-01-25	L	22	5	Thalidomide	0.506	4194	579.613	537.904	325.071	396.265	303.154	285.014	99.9105	43.6492	246.304	246.348	54.0163	36.1184	60.1812	2.98045	0.858369
RUES-GLR RefChem2 P1 2021-01-25	L	23	5	Thalidomide	0.0123	4616	723.634	712.565	359.177	396.052	292.898	278.602	85.1265	40.5728	245.131	245.478	48.7303	34.9434	75.4983	2.07972	0.758232
RUES-GLR RefChem2 P1 2021-01-25	L	24	5	Thalidomide	0.003	5146	640.826	614.264	331.982	376.245	313.367	289.278	100.394	50.0459	243.042	243.638	47.1471	37.9145	69.3354	3.92538	0.544112
RUES-GLR RefChem2 P1 2021-01-25	M	1	5	Lenalidomide	100	4336	437.361	321.36	255.768	169.105	281.839	265.841	91.0956	37.896	235.347	232.824	52.4739	36.5075	41.8127	1.89114	0.807196
RUES-GLR RefChem2 P1 2021-01-25	M	2	5	Lenalidomide	24.3	4421	447.159	338.292	273.765	187.037	278.295	259.876	93.7602	42.5269	230.326	227.015	53.2069	35.8389	41.9362	2.19407	0.927392
RUES-GLR RefChem2 P1 2021-01-25	M	3	5	Lenalidomide	5.93	3976	569.698	366.32	418.086	230.419	290.662	268.768	103.378	42.9991	240.232	237.697	61.3376	35.9612	46.8058	3.04326	1.18209
RUES-GLR RefChem2 P1 2021-01-25	M	4	5	Lenalidomide	1.44	4349	459.158	385.819	254.933	228.248	285.648	270.683	82.8785	43.8449	237.639	236.742	46.9051	38.3652	46.1485	1.97747	0.574845
RUES-GLR RefChem2 P1 2021-01-25	M	5	5	Lenalidomide	0.351	5251	489.876	428.391	262.532	274.121	295.552	282.788	75.9677	40.8857	238.988	240.226	40.6916	36.3845	50.6761	1.99962	0.361836
RUES-GLR RefChem2 P1 2021-01-25	M	6	5	Lenalidomide	0.0855	4637	658.031	591.296	395.982	450.137	287.931	271.134	105.797	40.8842	241.981	239.465	64.1887	38.0569	63.4031	2.30753	1.05672
RUES-GLR RefChem2 P1 2021-01-25	M	7	5	Lenalidomide	0.0208	4335	588.777	562.274	286.103	321.926	304.785	287.401	101.062	43.4936	245.181	243.702	56.0113	40.7107	67.0819	2.86044	0.991926
RUES-GLR RefChem2 P1 2021-01-25	M	8	5	Lenalidomide	0.00506	5064	675.873	656.328	353.866	417.51	296.859	279.692	85.3968	42.1355	243.275	242.754	43.2582	37.7611	70.6359	2.5079	0.533175
RUES-GLR RefChem2 P1 2021-01-25	M	9	5	Lenalidomide	0.00123	3173	284.578	277.047	57.2439	45.5692	437.972	410.066	144.407	99.0406	334.207	322.007	88.1692	66.3434	1.73338	16.6719	7.56382
RUES-GLR RefChem2 P1 2021-01-25	M	10	5	Lenalidomide	0.0003	5485	618.506	613.05	275.816	292.375	304.199	290.524	85.6528	46.1548	246.246	247.588	44.0859	39.6922	73.0538	2.04193	0.23701
RUES-GLR RefChem2 P1 2021-01-25	M	11	5	DEControl		5013	780.52	774.104	368.565	376.189	307.86	290.317	98.2997	46.8917	251.997	253	52.8205	38.3979	79.6928	2.91243	0.478755
RUES-GLR RefChem2 P1 2021-01-25	M	12	5	DMSOControl		4445	728.154	710.726	369.284	395.098	295.683	280.253	93.63	41.7233	247.468	246.506	52.5688	39.2518	75.8605	2.65467	1.01237
RUES-GLR RefChem2 P1 2021-01-25	M	13	5	SB431542		5192	452.322	267.188	474.28	53.3202	311.728	284.971	108.391	47.507	259.798	259.811	49.4228	42.7552	21.0131	4.69954	0.577812
RUES-GLR RefChem2 P1 2021-01-25	M	15	5	Aspirin	100	4043	703.689	687.569	342.855	371.964	294.543	276.96	100.301	39.9991	247.604	244.689	60.0293	37.9605	75.5874	2.79495	1.33564
RUES-GLR RefChem2 P1 2021-01-25	M	16	5	Aspirin	24.3	5329	591.627	573.398	275.933	313.027	290.449	275.156	90.5512	42.4972	244.806	243.894	51.7847	40.3742	69.2813	2.00788	0.469131
RUES-GLR RefChem2 P1 2021-01-25	M	17	5	Aspirin	5.93	4806	699.695	689.5	327.6	342.248	303.178	286.685	90.3319	46.8739	250.151	250.782	47.7246	39.8923	76.7374	2.58011	0.561798
RUES-GLR RefChem2 P1 2021-01-25	M	18	5	Aspirin	14.4	4731	638.706	619.402	305.682	328.513	300.886	285.716	88.1417	44.2882	243.698	245.101	47.0061	37.0087	72.5851	2.49419	0.422744
RUES-GLR RefChem2 P1 2021-01-25	M	19	5	Aspirin	0.351	5397	620.318	616.494	275.87	294.158	301.263	289.136	81.8858	41.2	250.739	252.078	45.1736	39.8612	73.4853	1.81582	0.352047
RUES-GLR RefChem2 P1 2021-01-25	M	20	5	Aspirin	8.55	4615	650.478	623.597	325.421	341.312	293.673	277.823	92.1603	41.7989	244.233	244.497	51.3789	37.2162	72.1777	2.25352	0.671723
RUES-GLR RefChem2 P1 2021-01-25	M	21	5	Aspirin	2.08	5425	706.475	700.091	321.546	330.117	296.595	283.484	77.5931	44.2008	244.661	245.892	41.8157	37.2652	78.7465	1.91705	0.423963
RUES-GLR RefChem2 P1 2021-01-25	M	22	5	Aspirin	0.506	4479	555.887	534.253	272.357	313.499	297.691	278.282	91.2145	43.7056	242.782	243.274	47.6523	35.7662	64.0545	2.76848	0.781424
RUES-GLR RefChem2 P1 2021-01-25	M	23	5	Aspirin	0.0123	4496	593.036	586.964	265.641	293.712	307.621	285.108	99.2964	42.7382	245.245	245.498	48.1204	36.7566	70.5071	3.7589	0.600534
RUES-GLR RefChem2 P1 2021-01-25	M	24	5	Aspirin	0.003	5117	621.358	618.587	287.994	317.426	317.783	298.794	90.187	49.4254	285.939	283.202	105.93	44.9317	71.6435	3.41997	1.17256
RUES-GLR RefChem2 P1 2021-01-25	N	1	5	Pomalidomide	100	4179	383.618	253.056	322.822	58.7243	293.184	262.741	122.883	42.813	366.966	359.126	84.0687	65.9831	21.3448	4.35511	7.37018
RUES-GLR RefChem2 P1 2021-01-25	N	2	5	Pomalidomide	24.3	4041	335.663	248.084	227.81	55.1898	284.432	260.411	104.362	41.6729	268.863	266.566	61.5354	43.9858	18.1143	3.0438	1.36105
RUES-GLR RefChem2 P1 2021-01-25	N	3	5	Pomalidomide	5.93	4468	336.528	252.498	213.426	54.1171	276.206	254.666	115.27	35.5083	244.908	239.756	62.5186	38.1503	18.6885	2.79767	1.34288
RUES-GLR RefChem2 P1 2021-01-25	N	4	5	Pomalidomide	1.44	4496	375.921	257.108	277.1	62.4427	284.759	261.863	109.308	39.704	239.387	236.463	55.7269	37.4468	22.9315	3.1806	0.956406
RUES-GLR RefChem2 P1 2021-01-25	N	5	5	Pomalidomide	0.351	4460	379.55	263.827	253.167	74.0114	273.164	258.152	95.5712	35.999	235.74	233.813	53.6559	36.6299	25.9865	2.13004	0.784753
RUES-GLR RefChem2 P1 2021-01-25	N	6	5	Pomalidomide	0.0855	4064	373.341	277.234	202.753	92.3245	277.885	263.486	90.8603	36.9219	238.86	237.117	53.6047	37.7766	29.0846	2.31299	0.959646
RUES-GLR RefChem2 P1 2021-01-25	N	7	5	Pomalidomide	0.0208	5066	571.433	493.998	340.191	355.255	281.348	267.178	90.7998	37.9168	238.082	238.308	48.1711	36.2555	56.6917	2.46743	0.651401
RUES-GLR RefChem2 P1 2021-01-25	N	8	5	Pomalidomide	0.00506	5758	716.675	700.267	368.369	410.921	291.685	279.757	78.1492	41.6292	244.748	247.617	40.9064	39.1562	73.5325	1.80618	0.24314
RUES-GLR RefChem2 P1 2021-01-25	N	9	5	Pomalidomide	0.00123	4576	649.902	645.794	277.087	283.558	285.081	276.727	86.2744	37.5068	247.054	246.058	56.0261	38.4646	77.1853	1.28934	0.76486
RUES-GLR RefChem2 P1 2021-01-25	N	10	5	Pomalidomide	0.0003	3977	606.061	594.818	288.536	320.206	294.017	278.463	91.694	42.0628	243.77	241.5	54.873	37.8419	69.2733	2.51446	1.00578
RUES-GLR RefChem2 P1 2021-01-25	N	11	5	DEControl		5270	721.424	708.359	337.821	342.212	308.438	293.096	88.2249	50.0348	249.708	250.732	43.7131	41.5091	77.8937	2.73245	0.379507
RUES-GLR RefChem2 P1 2021-01-25	N	12	5	DMSOControl		4706	619.915	587.193	329.922	376.493	302.974	284.019	95.2364	45.7716	244.426	244.387	49.7643	38.2644	66.5321	3.08117	0.743731
RUES-GLR RefChem2 P1 2021-01-25	N	13	5	SB431542		4042	317.769	254.709	187.951	43.3193	314.049	290.272	105.848	52.1149	268.927	269.269	54.8874	44.8857	14.9431	3.90896	0.890648
RUES-GLR RefChem2 P1 2021-01-25	N	15	5	ATRA	100	1632	279.987	248.766	75.3385	55.7435	495.463	406.656	199.57	120.501	770.19	780.777	242.96	277.825	6.12745	33.2108	88.7255
RUES-GLR RefChem2 P1 2021-01-25	N	16	5	ATRA	24.3	1098	321.169	319.808	63.7035	66.0906	600.801	590.006	194.148	201.356	630.285	620.595	198.071	202.34	6.37523	60.2914	81.694
RUES-GLR RefChem2 P1 2021-01-25	N	17	5	ATRA	5.93	2326	250.246	244.701	45.2194	30.5905	378.782	326.332	169.574	67.1581	321.847	299.246	105.385	54.0215	1.03181	10.834	8.77042
RUES-GLR RefChem2 P1 2021-01-25	N	18	5	ATRA	14.4	1737	317.428	313.969	63.4501	67.4865	578.506	558.748	189.773	196.218	629.811	602.59	334.748	209.524	5.92976	54.9798	78.8716
RUES-GLR RefChem2 P1 2021-01-25	N	19	5	ATRA	0.351	3954	298.898	255.135	126.268	49.6916	308.95	290.649	94.1327	51.0518	252.912	253.962	51.7692	41.9005	12.873	2.83257	0.733434
RUES-GLR RefChem2 P1 2021-01-25	N	20	5	ATRA	8.55	1808	283.683	277.37	58.166	57.1513	482.809	440.496	185.154	161.85	465.191	441.783	152.309	144.849	1.76991	31.1947	48.4513
RUES-GLR RefChem2 P1 2021-01-25	N	21	5	ATRA	2.08	3995	241.684	240.289	44.3148	30.2198	302.74	286.012	95.6977	42.3267	252.865	251.188	55.9468	39.0324	0.926158	2.42803	1.02628
RUES-GLR RefChem2 P1 2021-01-25	N	22	5	ATRA	0.506	4926	295.665	251.793	133.658	48.5685	307.627	285.979	92.5784	48.8546	244.104	244.504	47.6564	38.9635	12.566	3.06537	0.629314
RUES-GLR RefChem2 P1 2021-01-25	N	23	5	ATRA	0.0123	5554	631.235	602.468	334.045	396.289	312.708	292.902	88.9553	45.9191	247.396	249.219	41.9112	36.6691	67.3389	3.34894	0.450126
RUES-GLR RefChem2 P1 2021-01-25	N	24	5	ATRA	0.003	4891	613.812	570.037	343.64	416.811	324.804	291.412	121.383	60.7228	243.991	243.309	54.3332	39.3097	63.4431	5.99059	1.02229
RUES-GLR RefChem2 P1 2021-01-25	O	1	5	Saccharin	100	5350	667.704	655.379	315.994	338.426	302.775	282.401	108.441	46.3201	237.674	235.482	55.8455	35.2807	74.5794	2.48598	0.635514
RUES-GLR RefChem2 P1 2021-01-25	O	2	5	Saccharin	24.3	5391	896.687	875.1	463.517	465.358	288.348	269.886	94.7099	40.9642	232.458	230.191	52.7768	34.595	81.432	2.48562	0.834725
RUES-GLR RefChem2 P1 2021-01-25	O	3	5	Saccharin	5.93	4719	808.809	790.718	438.07	491.159	300.714	277.542	106.674	41.0013	239.512	238.775	55.0542	33.4979	75.8847	3.28459	1.08074
RUES-GLR RefChem2 P1 2021-01-25	O	4	5	Saccharin	1.44	5772	844.696	817.798	431.275	442.394	297.162	279.602	99.088	42.0221	239.364	238.257	53.4376	36.7863	80.7866	2.58143	0.675676
RUES-GLR RefChem2 P1 2021-01-25	O	5	5	Saccharin	0.351	5203	844.048	841.056	418.756	439.404	296.778	280.532	93.6463	44.6381	239.583	240.96	46.1307	36.893	80.0115	2.49856	0.499712
RUES-GLR RefChem2 P1 2021-01-25	O	6	5	Saccharin	0.0855	5335	660.424	660.364	282.013	289.81	300.92	288.142	83.3116	42.0747	243.706	243.417	46.8158	39.7411	78.0319	1.96813	0.431115
RUES-GLR RefChem2 P1 2021-01-25	O	7	5	Saccharin	0.0208	5537	805.67	806.109	405.174	421.757	295.422	281.311	82.7464	41.5958	240.734	242.56	42.5164	37.9501	78.3276	1.98664	0.415387
RUES-GLR RefChem2 P1 2021-01-25	O	8	5	Saccharin	0.00506	5543	787.225	775.5	406.992	440.555	300.474	280.779	103.848	47.3246	244.538	242.389	59.033	39.2504	76.2764	3.04889	0.865957
RUES-GLR RefChem2 P1 2021-01-25	O	9	5	Saccharin	0.00123	4784	779.789	731.033	414.986	457.393	291.987	276.183	86.8287	43.3305	242.088	242.502	45.1862	39.6677	76.296	2.15301	0.543478
RUES-GLR RefChem2 P1 2021-01-25	O	10	5	Saccharin	0.0003	5412	671.049	665.674	329.022	363.251	301.104	285.127	87.0444	45.7315	244.326	244.974	45.1241	40.5335	72.986	2.58684	0.443459
RUES-GLR RefChem2 P1 2021-01-25	O	11	5	DEControl		6012	719.881	718.162	298.587	289.305	308.217	297.203	82.1964	44.6263	254.217	255.323	49.6029	41.1992	81.9361	1.56354	0.365935
RUES-GLR RefChem2 P1 2021-01-25	O	12	5	DMSOControl		4758	610.812	597.804	271.579	281.94	301.161	291.271	69.3982	43.9873	247.485	247.518	42.0889	40.8656	72.6566	1.19798	0.23119
RUES-GLR RefChem2 P1 2021-01-25	O	13	5	SB431542		4439	292.428	249.786	147.553	41.2222	296.081	274.244	104.891	45.5647	262.071	261.476	55.6531	42.9554	11.4891	3.15386	0.743411
RUES-GLR RefChem2 P1 2021-01-25	O	15	5	Caffeine	100	4859	670.478	650.228	332.544	379.614	306.666	286.041	103.097	49.8939	246.738	245.986	50.6654	40.601	72.6281	3.82795	0.658572
RUES-GLR RefChem2 P1 2021-01-25	O	16	5	Caffeine	24.3	5281	648.735	623.46	301.368	308.078	290.078	283.096	70.803	38.773	244.789	247.437	41.3308	38.1117	75.1183	1.11721	0.302973
RUES-GLR RefChem2 P1 2021-01-25	O	17	5	Caffeine	5.93	5618	599.028	586.593	265.636	277.179	299.999	288.22	77.0647	40.3801	248.583	250.424	42.9504	39.1577	72.2677	1.83339	0.391598
RUES-GLR RefChem2 P1 2021-01-25	O	18	5	Caffeine	14.4	5634	773.686	765.433	362.828	372.722	302.053	287.998	83.4764	45.0406	249.06	249.627	44.4152	39.2074	79.6947	2.39617	0.479233
RUES-GLR RefChem2 P1 2021-01-25	O	19	5	Caffeine	0.351	5063	691.195	670.88	341.186	366.401	296.292	281.085	84.7739	45.5988	245.851	246.808	44.5767	38.1265	74.284	2.44914	0.375272
RUES-GLR RefChem2 P1 2021-01-25	O	20	5	Caffeine	8.55	5731	729.494	724.095	325.568	327.272	294.691	280.968	85.372	45.0429	243.536	244.529	44.7525	38.9805	80.3525	2.18112	0.33153
RUES-GLR RefChem2 P1 2021-01-25	O	21	5	Caffeine	2.08	4109	638.76	638.504	304.776	329.721	298.948	283.888	90.4959	41.7545	252.713	251.708	52.2019	37.9486	72.11	2.1173	0.778778
RUES-GLR RefChem2 P1 2021-01-25	O	22	5	Caffeine	0.506	4074	664.741	648.331	342.79	374.256	304.714	287.681	94.6013	48.934	248.769	248.398	55.9379	38.0079	71.2567	2.6755	0.662739
RUES-GLR RefChem2 P1 2021-01-25	O	23	5	Caffeine	0.0123	5310	695.132	688.256	321.673	323.069	293.898	278.397	81.5524	44.6337	240.047	241.888	41.4714	36.2711	77.3446	2.0339	0.225989
RUES-GLR RefChem2 P1 2021-01-25	O	24	5	Caffeine	0.003	4781	705.355	696.125	334.304	346.599	299.596	277.325	111.235	43.5944	246.012	242.475	67.13	37.621	77.055	2.94917	1.46413
RUES-GLR RefChem2 P1 2021-01-25	P	1	5	Thalidomide	100	5482	466.894	339.651	281.485	177.572	291.675	274.8	94.3285	40.9116	241.819	241.832	45.1006	36.0917	42.1926	2.62678	0.529004
RUES-GLR RefChem2 P1 2021-01-25	P	2	5	Thalidomide	24.3	5593	467.074	329.583	291.511	171.445	285.878	268.094	94.0144	41.1051	235.463	236.694	44.3415	36.856	41.6235	2.73556	0.33971
RUES-GLR RefChem2 P1 2021-01-25	P	3	5	Thalidomide	5.93	5487	545.085	460.85	328.227	319.878	296.195	270.237	119.72	46.4143	232.596	231.08	60.6889	37.2978	53.1438	3.7361	0.801895
RUES-GLR RefChem2 P1 2021-01-25	P	4	5	Thalidomide	1.44	5780	602.308	543.354	346.231	399.548	294.213	276.177	102.114	42.5506	238.946	238.184	54.7801	37.1651	60.917	2.69896	0.570934
RUES-GLR RefChem2 P1 2021-01-25	P	5	5	Thalidomide	0.351	4991	624.246	597.204	343.599	421.557	299.165	278.081	96.6971	45.0399	237.383	237.826	44.1313	37.5379	64.5963	3.50631	0.581046
RUES-GLR RefChem2 P1 2021-01-25	P	6	5	Thalidomide	0.0855	5491	680.753	671.266	335.061	372.901	290.924	276.7	82.8568	43.971	238.234	238.245	43.0052	39.1599	73.3746	1.85759	0.309598
RUES-GLR RefChem2 P1 2021-01-25	P	7	5	Thalidomide	0.0208	5495	663.152	653.123	307.874	313.143	297.309	281.86	88.0923	43.2786	240.76	240.928	46.8754	39.4727	75.5596	2.29299	0.454959
RUES-GLR RefChem2 P1 2021-01-25	P	8	5	Thalidomide	0.00506	5508	627.975	618.715	285.384	301.12	308.204	292.083	89.3315	45.5937	250.634	251.828	49.2556	39.9272	73.4931	2.46914	0.635439
RUES-GLR RefChem2 P1 2021-01-25	P	9	5	Thalidomide	0.00123	4777	835.877	813.911	461.68	503.252	296.599	280.597	88.5838	45.0369	244.197	243.823	49.1376	38.6884	75.8426	2.34457	0.586142
RUES-GLR RefChem2 P1 2021-01-25	P	10	5	Thalidomide	0.0003	4987	635.669	610.312	304.478	331.583	302.927	285.084	97.2018	42.3712	251.054	248.273	63.4162	39.8894	71.8468	2.58673	0.822138
RUES-GLR RefChem2 P1 2021-01-25	P	11	5	DEControl		5766	720.567	712.778	310.721	304.962	316.858	301.262	82.7109	51.7049	247.988	249.542	41.0196	38.9309	81.495	2.54943	0.277489
RUES-GLR RefChem2 P1 2021-01-25	P	12	5	DMSOControl		4692	576.425	552.361	279.79	324.881	301.839	287.361	93.3245	44.0458	249.734	247.727	54.7409	40.6692	65.7502	2.70673	0.831202
RUES-GLR RefChem2 P1 2021-01-25	P	13	5	SB431542		5604	289.438	247.606	135.097	38.6395	312.752	287.44	106.988	50.9132	275.838	275.272	52.833	46.0125	11.4918	4.60385	0.749465
RUES-GLR RefChem2 P1 2021-01-25	P	15	5	Folic Acid	100	5562	647.961	624.501	300.559	302.578	297.366	286.479	75.6746	41.369	251.583	253.203	43.6227	40.3949	75.1348	1.61812	0.377562
RUES-GLR RefChem2 P1 2021-01-25	P	16	5	Folic Acid	24.3	5717	683.212	672.073	328.041	346.635	310.042	293.65	84.6579	48.9866	251.389	253.422	41.9529	40.4913	75.4592	2.62375	0.332342
RUES-GLR RefChem2 P1 2021-01-25	P	17	5	Folic Acid	5.93	5716	707.668	705.902	313.684	327.917	301.228	286.259	87.566	48.3498	246.476	247.316	47.457	39.7693	78.7614	2.06438	0.384885
RUES-GLR RefChem2 P1 2021-01-25	P	18	5	Folic Acid	14.4	5363	670.774	664.45	308.395	319.619	313.026	297.152	87.2494	47.3424	253.076	255.051	41.8718	39.6032	75.9649	2.87153	0.372926
RUES-GLR RefChem2 P1 2021-01-25	P	19	5	Folic Acid	0.351	5089	682.174	669.3	331.223	351.569	307.697	287.128	94.8319	48.7019	249.137	250.953	45.7318	39.6729	74.4154	3.18334	0.373354
RUES-GLR RefChem2 P1 2021-01-25	P	20	5	Folic Acid	8.55	5347	635.685	614.718	296.181	298.557	294.478	277.554	89.0092	43.7515	250.094	249.135	51.2746	40.9509	74.4343	2.39387	0.617168
RUES-GLR RefChem2 P1 2021-01-25	P	21	5	Folic Acid	2.08	5511	668.474	667.598	327.563	357.397	306.423	284.701	96.3906	50.0585	243.602	244.759	46.5322	37.7173	73.0539	3.04845	0.562511
RUES-GLR RefChem2 P1 2021-01-25	P	22	5	Folic Acid	0.506	5085	671.784	667.094	314.303	346.553	311.908	290.825	100.739	49.6182	246.545	247.619	47.9869	37.0235	74.5526	3.46116	0.452311
RUES-GLR RefChem2 P1 2021-01-25	P	23	5	Folic Acid	0.0123	5713	766.451	750.636	373.834	384.103	312.867	293.019	92.2442	49.1704	251.979	252.805	46.5459	36.678	78.8727	3.18572	0.402591
RUES-GLR RefChem2 P1 2021-01-25	P	24	5	Folic Acid	0.003	5879	643.797	630.15	285.428	291.854	320.646	301.089	91.4081	52.5122	257.85	250.97	102.43	40.4987	75.8462	2.90866	1.59891
RUES-GLR RefChem2 P2 2021-01-25	A	14	6	PluriControl		5196	265.827	264.768	40.8317	34.8226	827.703	835.804	276.809	271.517	272.883	262.798	89.0638	43.0769	0.904542	82.8329	2.50192
RUES-GLR RefChem2 P2 2021-01-25	B	14	6	PluriControl		4782	252.187	248.987	41.2424	33.4171	794.591	801.98	260.158	239.489	250.848	239.097	91.8642	39.9583	0.83647	82.4132	2.76035
RUES-GLR RefChem2 P2 2021-01-25	C	14	6	PluriControl		4348	263.152	263.705	39.4326	31.6409	881.476	881.088	308.787	293.049	257.124	250.147	86.2198	36.0902	0.942962	85.2346	2.5989
RUES-GLR RefChem2 P2 2021-01-25	D	14	6	PluriControl		5011	254.787	254.697	39.9934	30.5519	836.429	841.889	290.549	292.756	255.077	246.665	87.5091	36.0227	1.05767	83.0573	2.23508
RUES-GLR RefChem2 P2 2021-01-25	E	14	6	PluriControl		4505	261.806	259.521	38.7775	36.2229	912.613	918.939	314.372	292.326	260.854	253.23	77.3758	42.1414	0.510544	86.0377	2.26415
RUES-GLR RefChem2 P2 2021-01-25	F	14	6	PluriControl		4496	259.711	261.317	38.5977	34.595	818.842	821.024	289.52	279.006	262.647	258.548	76.6082	39.621	0.489324	81.7171	2.00178
RUES-GLR RefChem2 P2 2021-01-25	G	14	6	PluriControl		4756	255.717	251.259	43.4003	30.8047	785.078	790.273	262.387	246.653	254.572	239.544	98.9048	40.4994	1.49285	81.8335	3.06981
RUES-GLR RefChem2 P2 2021-01-25	H	14	6	PluriControl		4963	266.257	267.187	37.2525	32.7343	874.953	889.16	271.298	262.094	263.489	259.119	73.5127	37.9827	0.644771	87.3061	2.01491
RUES-GLR RefChem2 P2 2021-01-25	I	14	6	PluriControl		5716	260.028	261.685	35.0073	34.4868	833.968	841.895	267.663	252.478	251.446	250.508	58.1972	39.2659	0.209937	85.4444	0.857243
RUES-GLR RefChem2 P2 2021-01-25	J	14	6	PluriControl		4667	254.93	255.105	35.4327	31.4059	799.868	801.899	243.669	232.872	253.545	247.887	67.6306	40.3208	0.449968	84.5082	1.77844
RUES-GLR RefChem2 P2 2021-01-25	K	14	6	PluriControl		4528	260.505	260.057	40.202	32.956	858.824	852.495	302.853	291.96	257.524	250.506	84.3899	40.7774	0.839223	84.4744	2.34099
RUES-GLR RefChem2 P2 2021-01-25	L	14	6	PluriControl		5122	261.868	260.438	41.1938	32.5067	879.828	879.805	309.92	297.177	260.631	250.26	94.0719	37.9338	1.19094	85.3768	3.37759
RUES-GLR RefChem2 P2 2021-01-25	M	14	6	PluriControl		5756	262.241	261.025	38.662	31.7788	951.763	946.457	300.636	271.386	260.917	253.226	81.348	40.1332	0.851286	91.296	2.25851
RUES-GLR RefChem2 P2 2021-01-25	N	14	6	PluriControl		4812	267.541	265.93	36.0328	33.9011	927.848	938.677	304.392	281.468	249.748	245.198	64.5708	38.7426	0.415628	88.3416	1.47548
RUES-GLR RefChem2 P2 2021-01-25	O	14	6	PluriControl		3747	253.33	249.857	42.3613	32.4689	822.678	818.357	276.166	265.906	258.773	246.105	99.5088	40.4913	1.25434	83.8804	3.52282
RUES-GLR RefChem2 P2 2021-01-25	P	14	6	PluriControl		1748	284.422	263.678	80.8139	41.0799	861.441	848.751	303.973	306.47	354.242	266.283	231.69	56.3418	9.15332	83.1808	19.9657
RUES-GLR RefChem2 P2 2021-01-25	A	1	6	Aspirin	100	5347	765.285	734.595	421.801	482.03	322.125	295.857	111.469	56.8755	246.602	247.711	48.2091	40.2511	73.3308	3.66561	0.467552
RUES-GLR RefChem2 P2 2021-01-25	A	2	6	Aspirin	24.3	6021	676.072	627.076	384.945	459.298	313.197	288.93	104.105	45.4877	244.259	243.422	54.3384	36.1502	66.3345	3.17223	0.647733
RUES-GLR RefChem2 P2 2021-01-25	A	3	6	Aspirin	5.93	5936	1847.48	1828.47	1117.8	1141.04	309.854	287.972	106.833	49.2601	243.325	241.848	54.1893	39.0391	84.5687	2.84703	0.673854
RUES-GLR RefChem2 P2 2021-01-25	A	4	6	Aspirin	1.44	6245	922.267	896.603	479.034	493.494	301.175	282.215	95.9065	44.1177	241.637	242.412	49.6181	37.4431	81.8575	2.11369	0.448359
RUES-GLR RefChem2 P2 2021-01-25	A	5	6	Aspirin	0.351	5881	1090.94	1070.32	607.954	622.025	307.016	286.851	97.6095	48.524	242.661	242.14	52.1587	37.7292	81.5848	2.48257	0.646149
RUES-GLR RefChem2 P2 2021-01-25	A	6	6	Aspirin	0.0855	5790	939.322	930.042	449.427	465.33	297.289	280.386	95.7541	43.1103	244.432	244.641	52.8872	36.509	84.3696	1.81347	0.587219
RUES-GLR RefChem2 P2 2021-01-25	A	7	6	Aspirin	0.0208	5862	876.746	846.932	454.385	485.808	305.698	284.801	109.128	47.0503	245.903	244.606	58.6464	38.9761	79.9045	2.86592	0.938246
RUES-GLR RefChem2 P2 2021-01-25	A	8	6	Aspirin	0.00506	5241	824.465	808.542	422.486	460.033	307.581	288.5	95.6035	48.5566	247.295	247.002	51.2238	39.7707	78.2675	2.38504	0.57241
RUES-GLR RefChem2 P2 2021-01-25	A	9	6	Aspirin	0.00123	5903	918.194	917.135	467.715	492.202	304.063	287.725	86.3688	46.3713	249.991	251.576	41.2152	40.26	80.4845	2.06675	0.271049
RUES-GLR RefChem2 P2 2021-01-25	A	10	6	Aspirin	0.0003	5434	1016.11	1002.15	583.52	653.487	315.691	291.657	103.676	52.7168	249.928	250.417	53.4388	39.2088	77.972	3.11005	0.864925
RUES-GLR RefChem2 P2 2021-01-25	A	11	6	DEControl		5668	2029.22	1989.58	1321.06	1423.45	332.737	302.41	114.523	64.1106	245.357	245.928	45.3033	40.2341	82.8334	4.8518	0.42343
RUES-GLR RefChem2 P2 2021-01-25	A	12	6	DMSOControl		5302	829.269	810.89	438.083	485.544	313.081	290.359	103.325	55.1675	248.814	249.54	49.8368	41.1399	76.6126	2.84798	0.622407
RUES-GLR RefChem2 P2 2021-01-25	A	13	6	SB431542		5683	285.46	249.386	145.795	33.8804	320.337	288.506	112.409	55.8332	265.509	266.466	49.1809	43.5795	8.78057	4.3287	0.52789
RUES-GLR RefChem2 P2 2021-01-25	A	15	6	Lenalidomide	100	4882	738.587	519.514	570.738	419.801	289.387	273.538	79.4371	42.0228	243.892	244.294	47.2447	37.9308	54.4039	1.70012	0.614502
RUES-GLR RefChem2 P2 2021-01-25	A	16	6	Lenalidomide	24.3	4832	524.225	383.389	338.715	237.399	285.634	270.569	86.1375	42.0547	246.842	247.329	49.9818	39.4979	46.9992	1.53146	0.57947
RUES-GLR RefChem2 P2 2021-01-25	A	17	6	Lenalidomide	5.93	4938	580.488	459.665	382.445	326.907	300.672	280.382	94.047	49.249	246.058	247.15	50.2257	37.5016	52.0859	2.30863	0.384771
RUES-GLR RefChem2 P2 2021-01-25	A	18	6	Lenalidomide	14.4	4647	534.887	360.626	366.601	216.165	283.834	269.056	85.1379	39.9116	245.774	245.398	51.4172	38.5016	45.836	1.82914	0.817732
RUES-GLR RefChem2 P2 2021-01-25	A	19	6	Lenalidomide	0.351	5173	598.625	548.097	353.581	410.379	300.104	282.525	86.2906	46.2542	249.111	250.122	48.4963	38.383	58.5347	1.68181	0.50261
RUES-GLR RefChem2 P2 2021-01-25	A	20	6	Lenalidomide	8.55	4917	510.735	389.695	320.986	236.635	291.856	275.432	83.7051	41.9991	249.073	249.326	49.2066	37.7737	47.1629	1.66768	0.589791
RUES-GLR RefChem2 P2 2021-01-25	A	21	6	Lenalidomide	2.08	4771	487.072	381.465	290.09	229.68	303.134	285.832	84.5313	46.8605	251.577	254.884	45.1677	37.79	46.07	1.97024	0.503039
RUES-GLR RefChem2 P2 2021-01-25	A	22	6	Lenalidomide	0.506	4669	653.575	507.758	456.539	400.366	305.335	281.216	102.749	52.831	245.925	244.155	56.9155	37.8137	54.3585	3.04134	0.89955
RUES-GLR RefChem2 P2 2021-01-25	A	23	6	Lenalidomide	0.0123	5675	679.539	669.677	352.843	421.883	322.769	296.792	104.222	54.9822	249.814	251.089	48.1826	37.3511	69.7269	3.47137	0.405286
RUES-GLR RefChem2 P2 2021-01-25	A	24	6	Lenalidomide	0.003	5516	835.116	802.102	496.256	585.386	320.779	295.286	106.636	57.8207	246.761	247.469	55.9797	38.532	72.2625	3.26323	0.652647
RUES-GLR RefChem2 P2 2021-01-25	B	1	6	ATRA	100	1384	318.847	311.008	74.321	78.7001	598.418	564.429	224.261	226.122	676.853	649.209	240.826	238.403	8.88728	50.6503	83.0202
RUES-GLR RefChem2 P2 2021-01-25	B	2	6	ATRA	24.3	1569	336.208	331.952	78.2834	79.0404	643.306	616.078	235.719	250.677	653.536	633.056	227.864	233.324	11.2811	59.9745	79.6048
RUES-GLR RefChem2 P2 2021-01-25	B	3	6	ATRA	5.93	3019	246.226	243.358	43.2297	32.5579	335.569	302.418	137.942	67.3886	287.543	270.904	102.389	51.0607	0.894336	4.6373	4.70354
RUES-GLR RefChem2 P2 2021-01-25	B	4	6	ATRA	1.44	4054	254.241	245.016	78.6434	32.1531	308.906	288.469	95.8352	49.9317	254.894	255.142	51.6572	42.7611	2.1707	2.51603	0.641342
RUES-GLR RefChem2 P2 2021-01-25	B	5	6	ATRA	0.351	5222	392.191	270.635	275.202	76.8165	319.742	284.502	122.956	58.4923	241.901	241.275	55.9991	36.5617	25.9288	4.44274	0.708541
RUES-GLR RefChem2 P2 2021-01-25	B	6	6	ATRA	0.0855	4304	786.078	376.66	781.016	239.097	330.511	291.608	129.365	67.3842	240.245	239.832	55.3567	36.0324	46.7472	5.78532	0.906134
RUES-GLR RefChem2 P2 2021-01-25	B	7	6	ATRA	0.0208	4282	923.557	645.603	768.764	608.231	338.688	296.64	137.819	67.8727	242.751	242.885	55.0834	36.1888	58.851	7.23961	0.864082
RUES-GLR RefChem2 P2 2021-01-25	B	8	6	ATRA	0.00506	5630	849.327	770.014	558.519	683.394	317.376	289.745	110.551	56.9622	243.607	244.592	50.7145	38.8686	67.4423	3.42806	0.390764
RUES-GLR RefChem2 P2 2021-01-25	B	9	6	ATRA	0.00123	4982	746.24	719.935	397.252	432.645	301.953	282.765	87.3454	46.1519	245.988	246.674	50.0093	38.4497	74.2071	1.8065	0.562023
RUES-GLR RefChem2 P2 2021-01-25	B	10	6	ATRA	0.0003	4425	943.563	911.971	580.474	713.811	318.434	291.178	111.074	55.1853	245.521	246.032	50.7214	36.8367	72.8362	4.0904	0.610169
RUES-GLR RefChem2 P2 2021-01-25	B	11	6	DEControl		4679	883.651	843.101	537.735	602.109	303.092	279.793	95.2692	49.762	239.485	240.37	46.4997	37.4016	74.2253	2.60739	0.577046
RUES-GLR RefChem2 P2 2021-01-25	B	12	6	DMSOControl		4399	998.855	957.072	582.467	622.17	304.547	280.926	99.7409	50.7835	246.297	245.364	54.0592	40.5239	79.1089	2.93248	1.00023
RUES-GLR RefChem2 P2 2021-01-25	B	13	6	SB431542		4538	338.339	254.399	323.391	39.2874	320.409	282.192	122.013	59.7658	257.676	258.324	53.2874	40.8553	10.952	5.61922	0.727193
RUES-GLR RefChem2 P2 2021-01-25	B	15	6	Pomalidomide	100	4239	349.582	257.196	258.823	51.7101	299.654	267.763	120.598	47.6419	364.682	360.368	79.4494	64.0972	16.7492	4.26987	6.77046
RUES-GLR RefChem2 P2 2021-01-25	B	16	6	Pomalidomide	24.3	4615	353.499	262.969	245.084	55.6301	296.539	269.125	114.092	41.0443	283.725	281.256	68.7675	44.9865	17.9198	3.2286	1.66847
RUES-GLR RefChem2 P2 2021-01-25	B	17	6	Pomalidomide	5.93	4868	325.335	260.19	174.842	55.0816	305.14	277.567	109.411	45.7523	255.553	257.536	50.3985	41.306	17.0912	4.19063	0.5341
RUES-GLR RefChem2 P2 2021-01-25	B	18	6	Pomalidomide	14.4	4932	354.023	264.18	234.074	53.2884	284.137	265.433	93.3275	34.0027	271.848	271.021	53.657	40.4438	18.5118	2.25061	0.790754
RUES-GLR RefChem2 P2 2021-01-25	B	19	6	Pomalidomide	0.351	4647	348.049	261.505	203.848	61.1054	301.624	274.453	105.86	46.8502	249.171	247.488	55.3191	39.2177	21.3471	3.16333	0.774693
RUES-GLR RefChem2 P2 2021-01-25	B	20	6	Pomalidomide	8.55	4863	313.393	257.68	160.324	48.1934	299.516	277.932	96.78	40.5476	265.61	267.279	49.3266	40.346	15.073	2.83775	0.431832
RUES-GLR RefChem2 P2 2021-01-25	B	21	6	Pomalidomide	2.08	4089	338.207	259.306	211.664	54.0156	297.852	269.032	113.495	40.4794	255.123	253.214	61.4471	40.684	18.4397	3.88848	1.2717
RUES-GLR RefChem2 P2 2021-01-25	B	22	6	Pomalidomide	0.506	3948	451.21	276.721	346.536	87.2866	294.956	267.694	104.449	44.5321	244.693	243.067	54.1623	37.4512	31.5856	3.14083	0.759878
RUES-GLR RefChem2 P2 2021-01-25	B	23	6	Pomalidomide	0.0123	5788	1145.87	1001.93	843.011	1024.21	306.286	285.084	98.7377	45.4469	243.996	245.244	48.3124	36.7047	69.886	2.81617	0.449205
RUES-GLR RefChem2 P2 2021-01-25	B	24	6	Pomalidomide	0.003	5214	987.672	916.947	663.335	816.228	308.585	281.172	104.893	56.7599	236.566	236.953	46.4557	38.5476	70.5217	3.20292	0.402762
RUES-GLR RefChem2 P2 2021-01-25	C	1	6	Caffeine	100	5482	1824.95	1743.22	1300.52	1533.55	308.678	287.788	97.0145	50.5322	238.037	237.909	45.2871	37.9709	78.3291	2.86392	0.456038
RUES-GLR RefChem2 P2 2021-01-25	C	2	6	Caffeine	24.3	5188	850.458	825.067	474.221	540.547	304.086	282.352	99.3741	46.988	245.568	245.583	47.8582	37.8056	75.6168	2.87201	0.558982
RUES-GLR RefChem2 P2 2021-01-25	C	3	6	Caffeine	5.93	4774	956.808	931.074	550.012	606.14	309.009	285.146	108.795	52.3098	241.533	239.643	54.4825	39.4794	77.2727	3.47717	0.754085
RUES-GLR RefChem2 P2 2021-01-25	C	4	6	Caffeine	1.44	4704	1061.94	1031.65	669.841	778.887	309.672	285.897	106.873	50.1326	245.3	245.188	57.083	39.4082	75.2976	3.01871	0.765306
RUES-GLR RefChem2 P2 2021-01-25	C	5	6	Caffeine	0.351	4250	882.944	855.397	509.663	586.714	307.158	281.812	107.63	51.1527	241.395	240.838	50.5698	39.3764	75.2471	2.98824	0.494118
RUES-GLR RefChem2 P2 2021-01-25	C	6	6	Caffeine	0.0855	4867	934.085	922.568	537.108	588.773	297.975	281.634	93.4155	46.7745	244.098	244.646	51.2801	39.0902	76.6797	2.26012	0.636943
RUES-GLR RefChem2 P2 2021-01-25	C	7	6	Caffeine	0.0208	4936	871.652	865.877	448.15	480.701	290.983	277.788	80.0173	43.0962	244.8	245.309	46.9532	38.8582	79.1532	1.37763	0.425446
RUES-GLR RefChem2 P2 2021-01-25	C	8	6	Caffeine	0.00506	4370	754.287	729.792	418.349	490.977	307.218	283.932	103.479	48.4529	249.408	247.658	52.194	40.3845	71.6018	3.15789	0.915332
RUES-GLR RefChem2 P2 2021-01-25	C	9	6	Caffeine	0.00123	5018	1021.4	1004.43	579.712	641.617	301.127	280.166	104.998	47.3565	244.541	244.804	57.8891	39.7196	79.155	2.77003	0.677561
RUES-GLR RefChem2 P2 2021-01-25	C	10	6	Caffeine	0.0003	4605	852.561	822.608	495.808	559.862	309.695	287.463	106.731	49.0296	251.222	249.508	58.0262	38.8782	74.2454	3.14875	1.12921
RUES-GLR RefChem2 P2 2021-01-25	C	11	6	DEControl		3839	670.468	647.57	352.03	426.485	316.974	292.103	109.93	54.8236	253.415	251.369	58.2745	40.6025	69.5233	3.30815	1.09403
RUES-GLR RefChem2 P2 2021-01-25	C	12	6	DMSOControl		4840	698.563	696.435	343.539	387.686	308.206	288.158	107.365	46.7582	254.765	250.68	100.653	41.2667	73.595	2.41736	0.867769
RUES-GLR RefChem2 P2 2021-01-25	C	13	6	SB431542		4732	282.542	246.464	146.115	36.6817	318.618	285.558	118.681	59.4886	264.861	263.972	57.6654	46.2356	8.47422	4.5858	1.05664
RUES-GLR RefChem2 P2 2021-01-25	C	15	6	Saccharin	100	4247	720.442	690.988	390.352	455.158	300.311	281.556	96.8578	43.6522	248.623	248.777	56.3753	38.595	71.5328	2.21333	0.612197
RUES-GLR RefChem2 P2 2021-01-25	C	16	6	Saccharin	24.3	4652	830.177	790.778	463.59	511.915	295.829	278.705	86.1543	46.7664	245.842	246.518	48.1393	38.3971	75.5374	1.6552	0.644884
RUES-GLR RefChem2 P2 2021-01-25	C	17	6	Saccharin	5.93	4346	686.929	660.445	354.264	400.407	299.088	282.645	92.2361	47.0666	251.904	247.211	211.214	39.512	71.537	2.16291	0.874367
RUES-GLR RefChem2 P2 2021-01-25	C	18	6	Saccharin	14.4	5214	765.942	750.02	397.697	452.959	303.14	282.717	96.5004	45.0406	247.795	246.465	50.9934	37.9686	74.7027	2.62754	0.652091
RUES-GLR RefChem2 P2 2021-01-25	C	19	6	Saccharin	0.351	4560	655.919	623.812	360.393	429.11	302.133	282.502	91.4035	45.1696	247.007	247.821	46.4675	37.1888	67.3246	2.52193	0.438596
RUES-GLR RefChem2 P2 2021-01-25	C	20	6	Saccharin	8.55	5358	992.301	963.074	604.105	708.372	302.316	282.879	95.8232	48.1934	246.025	246.837	50.1827	38.5713	74.8227	2.3143	0.522583
RUES-GLR RefChem2 P2 2021-01-25	C	21	6	Saccharin	2.08	3814	671.941	630.293	379.271	456.444	307.447	284.27	108.12	49.3543	249.497	246.458	62.6592	39.5031	66.387	3.09386	1.41584
RUES-GLR RefChem2 P2 2021-01-25	C	22	6	Saccharin	0.506	4032	1073.32	994.917	720.038	797.137	293.671	274.419	89.2043	44.8131	239.011	238.539	51.7193	37.9798	74.7768	2.08333	0.768849
RUES-GLR RefChem2 P2 2021-01-25	C	23	6	Saccharin	0.0123	4417	1031.64	978.314	681.376	859.665	304.431	276.727	110.119	51.9029	239.254	236.961	57.77	38.0035	71.8361	3.41861	0.996151
RUES-GLR RefChem2 P2 2021-01-25	C	24	6	Saccharin	0.003	5427	1778.36	1724.2	1156.46	1224.13	313.152	288.723	102.137	53.9088	237.09	238.305	45.9626	37.0887	82.237	3.24304	0.497512
RUES-GLR RefChem2 P2 2021-01-25	D	1	6	Folic Acid	100	5240	886.719	858.161	511.652	562.556	312.362	287.377	102.643	48.3676	244.777	246.931	40.3697	37.7129	76.0496	3.47328	0.305344
RUES-GLR RefChem2 P2 2021-01-25	D	2	6	Folic Acid	24.3	4598	1071.43	1039.34	687.805	816.945	299.769	275.811	105.48	49.3394	235.864	234.81	51.5836	37.9531	74.9021	2.56633	0.739452
RUES-GLR RefChem2 P2 2021-01-25	D	3	6	Folic Acid	5.93	4247	784.543	770.711	455.095	543.001	322.208	293.331	124.428	53.5693	247.849	246.429	60.1151	39.4431	71.2503	4.09701	0.659289
RUES-GLR RefChem2 P2 2021-01-25	D	4	6	Folic Acid	1.44	6041	896.796	878.562	504.362	588.348	307.845	284.741	100.766	46.7701	241.134	241.751	48.3482	39.7604	76.2788	3.19484	0.413839
RUES-GLR RefChem2 P2 2021-01-25	D	5	6	Folic Acid	0.351	5451	802.82	774.72	450.172	509.006	307.665	285.392	97.1581	44.5684	240.495	242.744	43.0536	37.2162	73.9864	2.86186	0.330215
RUES-GLR RefChem2 P2 2021-01-25	D	6	6	Folic Acid	0.0855	5389	1836.73	1811.15	1226.98	1354.91	305.117	281.761	102.097	48.9391	237.642	238.309	47.8271	36.2822	80.887	3.34014	0.501021
RUES-GLR RefChem2 P2 2021-01-25	D	7	6	Folic Acid	0.0208	6133	718.452	682.001	392.813	460.536	299.178	285.204	88.7519	42.048	249.707	249.243	48.8113	38.0035	71.0419	1.84249	0.423936
RUES-GLR RefChem2 P2 2021-01-25	D	8	6	Folic Acid	0.00506	4586	855.912	823.053	523.585	592.221	299.361	278.894	93.0047	48.458	240.939	242.085	43.7734	37.4045	72.4597	2.28958	0.414304
RUES-GLR RefChem2 P2 2021-01-25	D	9	6	Folic Acid	0.00123	5895	1092.72	1079.13	596.336	626.235	300.799	282.782	93.7712	42.9791	246.75	247.567	50.2109	36.1458	82.2901	2.25615	0.474979
RUES-GLR RefChem2 P2 2021-01-25	D	10	6	Folic Acid	0.0003	4599	757.502	734.581	402.004	448.544	307.063	287.463	90.8538	48.7449	244.453	244.332	46.6314	40.7819	73.8856	2.54403	0.500109
RUES-GLR RefChem2 P2 2021-01-25	D	11	6	DEControl		4743	878.39	852.578	493.207	532.28	304.637	288.671	87.8427	45.0088	256.23	257.316	50.3259	40.7493	76.7658	2.17162	0.653595
RUES-GLR RefChem2 P2 2021-01-25	D	12	6	DMSOControl		5073	805.194	782.031	418.614	435.067	298.059	283.101	88.3213	42.856	249.264	250.43	49.3879	38.9301	78.1983	1.83323	0.394244
RUES-GLR RefChem2 P2 2021-01-25	D	13	6	SB431542		4706	332.235	257.114	231.539	42.9339	306.753	277.801	107.992	49.7909	261.209	263.168	52.1385	41.5247	14.5559	3.54866	0.764981
RUES-GLR RefChem2 P2 2021-01-25	D	15	6	Thalidomide	100	3908	516.239	301.157	417.14	122.245	299.374	274.741	113.116	45.822	249.134	246.424	59.2557	41.1132	36.8731	3.58239	1.10031
RUES-GLR RefChem2 P2 2021-01-25	D	16	6	Thalidomide	24.3	4944	536.702	307.324	425.449	130.633	303.314	277.108	105.826	43.3957	248.49	248.141	50.1066	37.807	38.9968	3.45874	0.728155
RUES-GLR RefChem2 P2 2021-01-25	D	17	6	Thalidomide	5.93	4177	494.644	353.997	314.739	186.336	304.682	277.205	114.835	51.7116	251.915	248.578	62.1425	41.7041	42.8298	3.78262	1.05339
RUES-GLR RefChem2 P2 2021-01-25	D	18	6	Thalidomide	14.4	4011	433.61	310.986	260.365	139.267	296.193	271.742	113.555	39.6418	249.029	247.907	64.4024	35.4445	37.1229	3.16629	1.19671
RUES-GLR RefChem2 P2 2021-01-25	D	19	6	Thalidomide	0.351	3928	828.276	665.734	630.895	614.281	307.754	274.233	128.55	50.2676	244.344	240.772	65.9679	37.065	60.5143	4.60794	1.24745
RUES-GLR RefChem2 P2 2021-01-25	D	20	6	Thalidomide	8.55	3780	471.603	329.093	304.111	162.314	297.547	273.243	113.546	45.1808	247.308	244.959	62.9381	39.0747	40.5291	3.1746	1.13757
RUES-GLR RefChem2 P2 2021-01-25	D	21	6	Thalidomide	2.08	4347	498.165	390.775	300.803	234.613	300.099	278.317	101.274	43.5795	247.854	246.426	51.3029	38.257	46.9289	2.87555	0.828157
RUES-GLR RefChem2 P2 2021-01-25	D	22	6	Thalidomide	0.506	4652	714.679	592.07	500.073	498.125	308.764	277.769	112.261	50.2075	243.429	242.246	49.9715	35.7929	59.3293	4.27773	0.709372
RUES-GLR RefChem2 P2 2021-01-25	D	23	6	Thalidomide	0.0123	4502	737.839	682.826	439.777	519.185	301.614	277.18	104.652	52.2513	240.988	239.726	54.9828	38.6136	69.0582	2.84318	0.599733
RUES-GLR RefChem2 P2 2021-01-25	D	24	6	Thalidomide	0.003	5434	1009.61	979.236	561.887	589.838	303.69	283.152	96.1813	47.1118	242.306	242.602	52.3433	38.1377	80.1067	2.28193	0.607287
RUES-GLR RefChem2 P2 2021-01-25	E	1	6	Lenalidomide	100	3900	538.814	342.521	408.661	202.513	288.05	264.172	116.799	43.3171	238.703	235.707	68.0774	37.3927	43.7179	2.94872	1.25641
RUES-GLR RefChem2 P2 2021-01-25	E	2	6	Lenalidomide	24.3	3971	563.109	359.978	418.136	222.784	297.026	273.138	102.686	44.9791	241.568	240.439	55.7261	37.0487	46.3359	2.61899	0.604382
RUES-GLR RefChem2 P2 2021-01-25	E	3	6	Lenalidomide	5.93	4327	454.17	307.93	287.505	156.76	291.298	272.846	90.574	41.074	239.807	239.236	47.2869	37.9768	40.3744	1.87197	0.693321
RUES-GLR RefChem2 P2 2021-01-25	E	4	6	Lenalidomide	1.44	4206	503.944	356.306	339.868	206.15	292.969	272.127	108.166	41.7559	243.615	240.568	64.1653	39.6922	44.3652	2.28245	1.18878
RUES-GLR RefChem2 P2 2021-01-25	E	5	6	Lenalidomide	0.351	5170	668.323	575.755	435.126	473.519	288.065	270.502	95.4838	39.7441	239.221	238.291	59.1968	36.5935	59.6132	1.79884	0.696325
RUES-GLR RefChem2 P2 2021-01-25	E	6	6	Lenalidomide	0.0855	4464	661.657	567.004	431.018	463.523	296.401	275.121	97.9128	46.2008	244.163	243.523	53.1514	37.6736	58.2213	2.32975	0.694444
RUES-GLR RefChem2 P2 2021-01-25	E	7	6	Lenalidomide	0.0208	5098	724.148	701.519	399.182	475.563	299.196	280.868	92.9106	45.3372	247.36	247.358	50.5155	40.2941	70.714	2.19694	0.529619
RUES-GLR RefChem2 P2 2021-01-25	E	8	6	Lenalidomide	0.00506	4374	893.8	868.397	507.218	571.817	300.041	278.607	99.5258	47.521	245.126	244.669	50.4492	40.3008	75.9488	2.62917	0.617284
RUES-GLR RefChem2 P2 2021-01-25	E	9	6	Lenalidomide	0.00123	4306	834.891	780.926	514.636	601.29	303.67	282.304	97.7649	50.2068	245.44	245.007	50.7113	39.409	71.2262	2.85648	0.650255
RUES-GLR RefChem2 P2 2021-01-25	E	10	6	Lenalidomide	0.0003	4733	654.126	615.315	373.476	454.62	309.516	286.706	100.359	50.0022	249.168	248.489	49.1991	42.2022	65.1384	3.12698	0.654976
RUES-GLR RefChem2 P2 2021-01-25	E	11	6	DEControl		4507	773.565	760.376	420.951	493	338.44	307.86	114.606	60.3641	253.117	254.796	44.5382	40.4083	72.6647	5.12536	0.332816
RUES-GLR RefChem2 P2 2021-01-25	E	12	6	DMSOControl		5305	761.343	752.058	390.615	429.128	306.605	287.519	90.0345	42.9924	249.189	252.239	43.3642	35.3674	75.2121	2.54477	0.433553
RUES-GLR RefChem2 P2 2021-01-25	E	13	6	SB431542		5507	309.74	253.407	176.968	38.9094	328.914	296.047	113.449	58.6991	272.566	272.864	49.3839	44.776	12.9653	5.22971	0.70819
RUES-GLR RefChem2 P2 2021-01-25	E	15	6	Aspirin	100	4754	834.913	804.694	490.306	575.722	311.401	291.38	95.3554	50.8791	251.615	253.216	45.4643	39.9412	72.6756	2.98696	0.504838
RUES-GLR RefChem2 P2 2021-01-25	E	16	6	Aspirin	24.3	4795	740.942	717.863	402.622	476.503	308.571	289.07	96.1444	50.7657	252.219	251.727	48.8171	39.7915	71.9082	2.878	0.521376
RUES-GLR RefChem2 P2 2021-01-25	E	17	6	Aspirin	5.93	4650	876.886	838.228	512.766	609.31	302.793	285.634	90.9879	46.3579	250.897	252.309	47.5013	38.6847	74.5376	2.12903	0.494624
RUES-GLR RefChem2 P2 2021-01-25	E	18	6	Aspirin	14.4	5251	846.037	804.715	501.374	565.323	303.051	281.927	92.8848	52.1445	239.993	241.671	45.1317	37.7337	73.3384	2.28528	0.514188
RUES-GLR RefChem2 P2 2021-01-25	E	19	6	Aspirin	0.351	5008	771.999	750.525	422.789	483.104	291.049	274.505	85.7196	40.3816	242.216	242.856	50.1697	35.7425	73.4425	1.83706	0.638978
RUES-GLR RefChem2 P2 2021-01-25	E	20	6	Aspirin	8.55	4398	852.601	820.936	500.334	578.77	294.998	274.446	93.1623	45.7871	241.595	240.983	50.8054	35.0353	73.6244	2.20555	0.818554
RUES-GLR RefChem2 P2 2021-01-25	E	21	6	Aspirin	2.08	4278	670.266	625.429	386.644	443.749	293.867	269.781	104.148	48.9569	239.405	237.595	55.4576	36.2355	66.9238	2.92193	1.05189
RUES-GLR RefChem2 P2 2021-01-25	E	22	6	Aspirin	0.506	5026	783.166	766.649	440.52	516.344	301.548	278.966	100.268	50.5344	239.867	240.451	47.8587	37.2548	71.9061	3.20334	0.676482
RUES-GLR RefChem2 P2 2021-01-25	E	23	6	Aspirin	0.0123	4778	830.172	808.918	474.388	536.697	296.65	274.521	96.1988	48.845	238.197	238.924	48.3794	39.5135	73.5454	2.90917	0.56509
RUES-GLR RefChem2 P2 2021-01-25	E	24	6	Aspirin	0.003	4951	728.132	695.164	379.221	397.725	301.997	282.025	98.665	48.1726	240.456	239.109	58.349	38.1903	75.4393	2.20158	0.706928
RUES-GLR RefChem2 P2 2021-01-25	F	1	6	Pomalidomide	100	4021	346.787	248.089	256.543	57.1009	283.697	254.288	124.165	41.9739	370.605	361.226	123.244	65.8912	18.5775	3.87963	8.45561
RUES-GLR RefChem2 P2 2021-01-25	F	2	6	Pomalidomide	24.3	5186	385.919	263.017	288.218	61.5279	283.925	264.091	96.1597	35.443	300.121	296.83	60.2931	48.8976	22.445	2.68029	1.23409
RUES-GLR RefChem2 P2 2021-01-25	F	3	6	Pomalidomide	5.93	4129	298.415	244.139	158.096	44.2245	285.166	259.739	107.267	40.3638	246.371	244.896	52.6369	38.3534	12.8845	3.31799	0.92032
RUES-GLR RefChem2 P2 2021-01-25	F	4	6	Pomalidomide	1.44	4112	317.246	248.172	189.998	49.5529	298.977	266.585	119.497	46.1978	246.043	244.05	53.3115	39.1399	15.5399	4.25584	0.948444
RUES-GLR RefChem2 P2 2021-01-25	F	5	6	Pomalidomide	0.351	4938	358.897	259.69	235.012	65.8148	278.691	259.764	86.8828	37.3193	237.911	238.519	43.5164	38.4127	22.2965	2.10612	0.405022
RUES-GLR RefChem2 P2 2021-01-25	F	6	6	Pomalidomide	0.0855	5082	731.202	331.746	740.047	165.77	300.569	270.97	113.331	45.6337	240.257	240.091	47.1405	38.28	42.3455	4.11255	0.570641
RUES-GLR RefChem2 P2 2021-01-25	F	7	6	Pomalidomide	0.0208	4052	601.194	495.984	393.097	379.099	289.067	265.099	106.529	43.3942	239.952	236.745	59.516	38.28	54.4916	2.88746	0.937808
RUES-GLR RefChem2 P2 2021-01-25	F	8	6	Pomalidomide	0.00506	3979	658.421	623.576	373.81	470.801	319.842	288.664	124.206	53.8688	245.785	243.023	65.1748	40.5402	64.7148	4.27243	0.90475
RUES-GLR RefChem2 P2 2021-01-25	F	9	6	Pomalidomide	0.00123	4632	678.09	635.231	396.447	484.471	308.183	286.209	101.934	49.4707	251.095	250.252	52.9341	41.2697	65.8895	2.9361	0.712435
RUES-GLR RefChem2 P2 2021-01-25	F	10	6	Pomalidomide	0.0003	4345	1603.14	1512.13	1148.03	1449.67	321.849	291.203	123.579	55.6094	245.019	246.273	49.6066	38.0628	75.0058	4.78711	0.437284
RUES-GLR RefChem2 P2 2021-01-25	F	11	6	DEControl		5095	1091.32	1075.77	644.469	724.521	315.615	294.58	105.034	57.7532	252.1	252.89	55.5964	42.6411	77.8606	3.14033	0.628067
RUES-GLR RefChem2 P2 2021-01-25	F	12	6	DMSOControl		5185	941.235	916.563	525.09	573.247	300.311	284.937	86.5894	43.5618	248.03	248.668	49.7655	39.3408	77.9171	1.83221	0.559306
RUES-GLR RefChem2 P2 2021-01-25	F	13	6	SB431542		4297	273.99	248.274	116.611	35.3941	313.288	287.226	106.305	54.2602	268.916	269.124	57.6161	43.5988	6.79544	3.165	0.721434
RUES-GLR RefChem2 P2 2021-01-25	F	15	6	ATRA	100	1364	331.043	325.582	71.8502	74.8424	590.944	563.373	207.287	204.438	656.112	627.433	225.563	211.824	11.2903	50.6598	82.478
RUES-GLR RefChem2 P2 2021-01-25	F	16	6	ATRA	24.3	1728	314.341	310.781	63.871	65.2211	556.012	532.297	185.911	190.721	587.398	566.902	188.416	197.614	4.74537	44.2708	73.7847
RUES-GLR RefChem2 P2 2021-01-25	F	17	6	ATRA	5.93	3352	250.728	250.589	41.0192	32.3185	322.88	295.506	123.935	52.1564	281.525	272.907	81.8022	45.243	0.775656	3.78878	3.19212
RUES-GLR RefChem2 P2 2021-01-25	F	18	6	ATRA	14.4	1579	324.914	321.894	68.0235	72.1997	558.106	538.423	190.218	206.631	590.122	577.537	195.055	195.039	8.1064	45.6618	74.0342
RUES-GLR RefChem2 P2 2021-01-25	F	19	6	ATRA	0.351	5417	334.295	259.667	198.621	53.8851	311.757	288.229	103.917	51.5322	253.237	253.599	53.8165	40.5017	17.2974	2.69522	0.719956
RUES-GLR RefChem2 P2 2021-01-25	F	20	6	ATRA	8.55	2759	296.03	289.996	62.7943	63.9594	455.714	415.699	175.512	150.899	464.657	442.163	147.679	141.658	3.2983	23.1606	47.4085
RUES-GLR RefChem2 P2 2021-01-25	F	21	6	ATRA	2.08	4844	245.859	243.81	43.7658	30.7632	299.58	277.31	103.707	45.819	249.422	247.177	61.4165	38.3007	0.949628	2.45665	1.30058
RUES-GLR RefChem2 P2 2021-01-25	F	22	6	ATRA	0.506	4564	322.745	256.408	182.141	54.5723	304.08	281.671	100.856	50.7487	243.829	243.974	53.7826	35.847	15.6004	2.695	0.788782
RUES-GLR RefChem2 P2 2021-01-25	F	23	6	ATRA	0.0123	4673	861.856	781.761	574.393	700.586	310.692	279.66	111.678	49.2312	239.671	240.333	49.3721	33.7217	67.8365	4.3441	0.706184
RUES-GLR RefChem2 P2 2021-01-25	F	24	6	ATRA	0.003	4460	574.057	506.863	348.006	382.033	322.663	288.089	119.198	62.5524	238.694	238.317	52.9054	35.6914	55.852	4.84305	0.717489
RUES-GLR RefChem2 P2 2021-01-25	G	1	6	Saccharin	100	4365	858.084	813.564	529.311	654.547	310.339	281.173	117.897	53.2476	235.298	233.017	55.8612	35.6565	71.5006	4.23826	0.962199
RUES-GLR RefChem2 P2 2021-01-25	G	2	6	Saccharin	24.3	4965	973.764	977.63	550.543	601.515	310.239	282.756	119.308	50.5522	236.729	234.671	58.5075	38.2422	77.6234	3.86707	0.584089
RUES-GLR RefChem2 P2 2021-01-25	G	3	6	Saccharin	5.93	5194	886.187	832.028	546.497	635.713	306.919	280.429	117.206	47.9006	241.674	242.753	52.2953	37.8641	73.0651	4.13939	0.616095
RUES-GLR RefChem2 P2 2021-01-25	G	4	6	Saccharin	1.44	4632	698.43	672.534	375.073	438.824	313.132	287.7	105.067	52.5641	243.271	242.884	48.234	37.7603	70.6174	3.47582	0.60449
RUES-GLR RefChem2 P2 2021-01-25	G	5	6	Saccharin	0.351	4615	748.731	731.779	395.264	440.571	301.206	277.021	102.064	48.4173	239.666	238.815	50.5827	37.5735	74.1495	2.99025	0.606717
RUES-GLR RefChem2 P2 2021-01-25	G	6	6	Saccharin	0.0855	4499	839.51	811.4	458.549	519.844	295.805	276.088	102.029	41.8923	239.33	238.105	56.6373	35.1688	76.4837	2.33385	0.866859
RUES-GLR RefChem2 P2 2021-01-25	G	7	6	Saccharin	0.0208	4577	880.989	825.53	535.886	593.243	295.907	276.418	97.6847	43.799	241.172	240.125	56.6879	37.9546	74.5029	2.25038	0.524361
RUES-GLR RefChem2 P2 2021-01-25	G	8	6	Saccharin	0.00506	4836	1035.65	983.634	637.685	751.403	292.333	274.22	94.1181	44.839	241.799	241.204	50.7013	38.9153	76.1787	2.44003	0.82713
RUES-GLR RefChem2 P2 2021-01-25	G	9	6	Saccharin	0.00123	4691	867.323	834.704	494.541	567.074	304.157	285.046	102.325	48.9732	247.043	247.723	59.7691	39.7455	75.2718	2.51546	0.639522
RUES-GLR RefChem2 P2 2021-01-25	G	10	6	Saccharin	0.0003	5003	800.409	780.225	447.628	530.393	301.663	281.719	97.3806	46.1385	247.407	248.248	48.9215	41.5617	72.9362	3.01819	0.4997
RUES-GLR RefChem2 P2 2021-01-25	G	11	6	DEControl		5080	784.896	778.689	401.144	435.283	321.513	297.966	102.438	52.7657	251.929	252.305	48.8735	41.3304	75.9646	3.4252	0.748031
RUES-GLR RefChem2 P2 2021-01-25	G	12	6	DMSOControl		4601	869.932	800.04	528.16	606.976	299.55	282.678	89.857	46.312	250.291	248.78	56.9476	42.4202	73.897	2.06477	0.73897
RUES-GLR RefChem2 P2 2021-01-25	G	13	6	SB431542		5268	307.509	255.107	160.599	40.541	337.224	300.279	123.197	63.7755	270.505	271.399	56.3015	46.0355	13.5915	6.60592	0.702354
RUES-GLR RefChem2 P2 2021-01-25	G	15	6	Caffeine	100	4483	1041.27	1005.19	667.06	827.928	302.599	279	108.055	50.2186	292.324	242.726	487.948	42.8812	72.6969	2.98907	2.92215
RUES-GLR RefChem2 P2 2021-01-25	G	16	6	Caffeine	24.3	5579	819.106	782.863	472.529	557.097	308.695	285.626	101.993	50.0303	246.827	249.449	46.7348	37.3793	72.4323	3.13676	0.358487
RUES-GLR RefChem2 P2 2021-01-25	G	17	6	Caffeine	5.93	4755	786.03	735.619	483.926	603.403	309.082	285.855	96.542	48.146	243.239	244.763	41.3657	37.0146	67.9495	2.86015	0.294427
RUES-GLR RefChem2 P2 2021-01-25	G	18	6	Caffeine	14.4	4857	720.698	708.951	375.762	424.037	300.244	281.601	97.9531	42.0628	250.463	250.354	56.2716	36.9197	72.761	2.14124	0.967675
RUES-GLR RefChem2 P2 2021-01-25	G	19	6	Caffeine	0.351	4775	750.577	727.701	403.584	446.335	297.732	282.193	87.8317	42.6722	248.469	248.53	47.6622	36.9775	73.6754	2.01047	0.670157
RUES-GLR RefChem2 P2 2021-01-25	G	20	6	Caffeine	8.55	5109	648.911	633.285	334.847	387.056	312.016	286.702	101.529	49.4195	244.224	245.453	43.5931	37.2162	69.7397	3.7385	0.352319
RUES-GLR RefChem2 P2 2021-01-25	G	21	6	Caffeine	2.08	4808	761.583	734.793	411.686	441.808	287.483	271.251	80.4887	41.4935	236.009	237.293	44.4116	35.4571	74.4384	1.68469	0.478369
RUES-GLR RefChem2 P2 2021-01-25	G	22	6	Caffeine	0.506	4722	779.273	744.644	437.235	476.943	292.495	271.947	91.7522	42.4202	236.259	236.561	43.2054	33.8937	74.3964	2.56247	0.381194
RUES-GLR RefChem2 P2 2021-01-25	G	23	6	Caffeine	0.0123	4434	586.672	557.549	314.613	367.989	303.011	280.301	98.9035	47.9391	243.543	243.243	49.6033	37.6417	63.5769	2.99955	0.879567
RUES-GLR RefChem2 P2 2021-01-25	G	24	6	Caffeine	0.003	5198	715.831	682.619	397.484	480.898	308.282	281.751	108.268	51.4284	241.628	240.566	53.5832	38.2259	69.9885	3.69373	0.557907
RUES-GLR RefChem2 P2 2021-01-25	H	1	6	Thalidomide	100	5028	477.167	315.084	322.293	150.981	286.896	265.072	102.794	40.9509	237.317	236.119	47.961	39.0524	40.1551	2.94352	0.596659
RUES-GLR RefChem2 P2 2021-01-25	H	2	6	Thalidomide	24.3	4407	473.905	292.256	341.271	129.585	288.599	260.57	115.103	39.1614	231.578	231.841	50.6042	35.2073	37.8262	3.97096	0.408441
RUES-GLR RefChem2 P2 2021-01-25	H	3	6	Thalidomide	5.93	4701	544.507	370.427	390.012	224.608	295.505	263.846	119.336	43.2163	236.645	235.168	51.7854	37.1629	46.0328	4.31823	0.744522
RUES-GLR RefChem2 P2 2021-01-25	H	4	6	Thalidomide	1.44	4186	587.665	505.125	357.398	375.472	295.096	274.611	109.547	42.5588	245.806	243.147	62.2652	37.8878	56.2828	2.77114	0.979455
RUES-GLR RefChem2 P2 2021-01-25	H	5	6	Thalidomide	0.351	4362	1020.02	903.923	764.731	925.614	289.729	266.091	111.152	41.3089	237.766	233.487	62.8101	38.2689	66.1165	2.95736	1.46722
RUES-GLR RefChem2 P2 2021-01-25	H	6	6	Thalidomide	0.0855	4301	761.224	711.042	477.417	595.707	314.196	291.919	101.402	49.0073	245.376	245.426	48.1884	38.5995	66.2404	3.30156	0.511509
RUES-GLR RefChem2 P2 2021-01-25	H	7	6	Thalidomide	0.0208	4460	951.05	878.946	643.091	769.906	293.238	271.976	92.9902	44.0429	234.873	234.916	44.2107	38.0532	70.6278	2.66816	0.515695
RUES-GLR RefChem2 P2 2021-01-25	H	8	6	Thalidomide	0.00506	4873	656.32	644.623	348.186	407.703	305.615	285.446	95.4538	48.0807	245.156	244.984	65.0599	40.4186	68.3973	2.83193	0.595116
RUES-GLR RefChem2 P2 2021-01-25	H	9	6	Thalidomide	0.00123	4847	683.756	663.066	360.307	428.879	294.76	278.511	88.338	44.7567	244.351	243.91	48.9819	41.7189	70.1258	1.62987	0.557046
RUES-GLR RefChem2 P2 2021-01-25	H	10	6	Thalidomide	0.0003	5114	966.995	944.011	530.759	537.311	297.626	281.812	91.2317	44.3483	246.749	247.553	49.7232	41.5899	80.4458	2.17051	0.527962
RUES-GLR RefChem2 P2 2021-01-25	H	11	6	DEControl		5179	724.562	716.357	383.75	440.366	323.412	299.15	101.637	55.1394	251.607	252.945	46.4088	39.3349	72.3113	3.55281	0.444101
RUES-GLR RefChem2 P2 2021-01-25	H	12	6	DMSOControl		5046	798.368	768.987	434.189	489.657	295.521	280.082	94.2996	42.9902	246.611	247.457	49.1608	39.9375	74.7721	1.70432	0.435989
RUES-GLR RefChem2 P2 2021-01-25	H	13	6	SB431542		4143	289.356	251.955	128.979	39.8345	323.641	291.801	112.963	56.1609	268.148	268.439	62.3331	41.2652	10.7651	4.53777	0.724113
RUES-GLR RefChem2 P2 2021-01-25	H	15	6	Folic Acid	100	5009	802.029	788.016	470.391	586.717	305.186	284.221	93.7237	48.7093	258.332	251.172	68.5637	40.9123	69.5348	2.45558	2.775
RUES-GLR RefChem2 P2 2021-01-25	H	16	6	Folic Acid	24.3	4912	678.52	661.236	344.817	401.828	314.029	293.502	101.175	49.6315	254.445	255.616	49.4895	40.8834	71.0708	2.9316	0.468241
RUES-GLR RefChem2 P2 2021-01-25	H	17	6	Folic Acid	5.93	4593	741.509	741.463	354.033	382.744	296.379	278.962	94.3236	45.3053	247.555	247.25	52.7646	39.4727	77.2262	2.41672	0.740257
RUES-GLR RefChem2 P2 2021-01-25	H	18	6	Folic Acid	14.4	3845	699.79	663.05	390.549	433.871	301.347	280.858	97.1726	44.8012	250.803	249.653	53.8997	38.9049	69.7529	2.6788	0.806242
RUES-GLR RefChem2 P2 2021-01-25	H	19	6	Folic Acid	0.351	4766	881.826	827.701	517.819	562.068	298.653	278.834	107.812	45.8257	246.599	247.369	57.2494	37.6788	75.7449	2.28703	0.566513
RUES-GLR RefChem2 P2 2021-01-25	H	20	6	Folic Acid	8.55	5227	697.284	681.407	340.992	370.018	293.721	278.753	81.4768	43.0784	242.883	244.067	42.037	38.2867	74.67	1.66443	0.286971
RUES-GLR RefChem2 P2 2021-01-25	H	21	6	Folic Acid	2.08	4741	717.674	697.524	381.804	437.268	299.656	281.007	89.0999	47.9132	240.209	240.757	44.9859	36.1502	72.1367	2.42565	0.5695
RUES-GLR RefChem2 P2 2021-01-25	H	22	6	Folic Acid	0.506	4033	1146.53	1095.69	717.285	779.852	299.49	278.312	101.191	48.0689	238.03	239.509	49.4566	34.0138	77.8081	2.75229	0.619886
RUES-GLR RefChem2 P2 2021-01-25	H	23	6	Folic Acid	0.0123	3641	656.627	646.738	353.449	426.455	312.249	287.19	107.23	47.7412	247.945	248.074	52.8779	36.7196	67.7286	3.57045	0.878879
RUES-GLR RefChem2 P2 2021-01-25	H	24	6	Folic Acid	0.003	4220	688.106	660.875	388.961	461.327	305.345	279.648	107.566	48.7916	243.537	241.863	61.4286	37.5283	67.7251	2.96209	1.06635
RUES-GLR RefChem2 P2 2021-01-25	I	1	6	Aspirin	100	5063	836.944	793.924	510.145	620.032	312.314	278.82	129.61	51.639	239.709	236.011	67.9033	37.535	71.0448	4.44401	1.04681
RUES-GLR RefChem2 P2 2021-01-25	I	2	6	Aspirin	24.3	4731	871.614	857.278	501.289	572.524	292.792	268.184	100.268	45.9132	229.663	230.088	45.7804	33.7514	75.0159	2.93807	0.570704
RUES-GLR RefChem2 P2 2021-01-25	I	3	6	Aspirin	5.93	3907	742.02	682.341	462.238	562.378	299.137	276.766	100.74	46.8116	244.288	244.393	52.4746	39.5543	66.752	2.73867	0.691067
RUES-GLR RefChem2 P2 2021-01-25	I	4	6	Aspirin	1.44	5132	1381.73	1374.68	850.162	943.712	286.932	268.473	87.1683	39.7189	233.747	234.48	43.3216	35.254	79.9883	2.14341	0.467654
RUES-GLR RefChem2 P2 2021-01-25	I	5	6	Aspirin	0.351	4796	776.571	744.784	446.982	506.419	298.965	276.865	106.114	47.1074	241.31	240.294	57.9754	40.1503	72.0392	2.77314	0.813178
RUES-GLR RefChem2 P2 2021-01-25	I	6	6	Aspirin	0.0855	4690	720.265	697.142	398.126	452.269	300.355	274.823	111.823	44.716	239.614	237.97	55.2716	39.111	71.2367	3.4968	0.767591
RUES-GLR RefChem2 P2 2021-01-25	I	7	6	Aspirin	0.0208	3723	641.549	587.419	377.013	414.723	299.286	274.887	110.363	47.9532	242.728	239.467	64.4381	40.4513	65.2431	3.16949	1.2087
RUES-GLR RefChem2 P2 2021-01-25	I	8	6	Aspirin	0.00506	4839	810.283	796.611	399.783	413.416	298.661	280.58	104.886	42.3104	248.682	246.907	61.653	39.3601	79.5826	2.62451	1.03327
RUES-GLR RefChem2 P2 2021-01-25	I	9	6	Aspirin	0.00123	4276	937.301	917.174	535.005	582.545	292.104	274.991	89.2623	43.7256	242.78	243.41	47.2976	38.277	76.8241	2.26848	0.584659
RUES-GLR RefChem2 P2 2021-01-25	I	10	6	Aspirin	0.0003	4575	747.073	720.716	393.323	430.63	309.775	292.138	100.702	49.0355	252.023	251.666	57.1464	42.5195	74.1858	2.68852	0.874317
RUES-GLR RefChem2 P2 2021-01-25	I	11	6	DEControl		4344	777.75	742.067	442.412	508.197	307.419	284.223	104.409	50.8295	245.545	243.899	56.4725	40.1355	72.6059	2.99263	0.89779
RUES-GLR RefChem2 P2 2021-01-25	I	12	6	DMSOControl		5102	678.024	654.61	353.73	400.973	304.117	283.145	97.1632	46.8961	245.355	246.519	50.7531	38.6714	70.6978	2.45002	0.588005
RUES-GLR RefChem2 P2 2021-01-25	I	13	6	SB431542		4434	316.486	259.279	176.599	45.1363	324.783	293.062	112.867	57.5412	272.866	274.536	49.7339	45.0251	13.5544	4.93911	0.721696
RUES-GLR RefChem2 P2 2021-01-25	I	15	6	Lenalidomide	100	4377	445.872	306.495	274.121	132.756	281.494	270.292	82.2554	37.3081	251.842	252.42	51.7679	40.174	38.5652	1.27942	0.616861
RUES-GLR RefChem2 P2 2021-01-25	I	16	6	Lenalidomide	24.3	4029	470.291	312.593	310.799	145.13	291.147	271.444	97.6292	42.5654	250.822	246.728	86.1216	36.8708	39.9603	2.18416	1.4892
RUES-GLR RefChem2 P2 2021-01-25	I	17	6	Lenalidomide	5.93	4346	457.107	327.087	284.192	154.686	287.215	266.216	101.652	40.4216	243.799	241.947	56.4453	37.4431	39.8297	2.78417	1.08145
RUES-GLR RefChem2 P2 2021-01-25	I	18	6	Lenalidomide	14.4	4220	442.933	319.623	263.093	150.176	290.111	274.031	90.0456	40.4868	249.292	248.024	52.6542	39.5795	39.0047	1.96682	0.876777
RUES-GLR RefChem2 P2 2021-01-25	I	19	6	Lenalidomide	0.351	4072	498.591	419.473	278.273	257.095	302.33	281.112	105.256	44.8946	252.537	250.866	58.1287	40.0339	49.558	3.11886	1.20334
RUES-GLR RefChem2 P2 2021-01-25	I	20	6	Lenalidomide	8.55	4882	414.739	304.716	232.072	132.121	287.961	272.38	83.0463	43.26	243.097	243.694	47.1751	37.3852	36.6653	1.20852	0.430152
RUES-GLR RefChem2 P2 2021-01-25	I	21	6	Lenalidomide	2.08	3846	434.888	324.957	258.674	161.176	281.237	263.19	94.2077	36.7833	240.62	238.117	62.0233	33.3741	39.1316	1.87207	1.24805
RUES-GLR RefChem2 P2 2021-01-25	I	22	6	Lenalidomide	0.506	4043	569.624	470.242	358.019	336.086	287.407	269.877	86.2402	41.8049	241.265	243.553	44.5505	35.9427	53.2031	2.1766	0.519416
RUES-GLR RefChem2 P2 2021-01-25	I	23	6	Lenalidomide	0.0123	4019	597.001	558.677	332.059	401.96	306.602	275.64	117.804	47.5233	243.43	239.395	65.5379	35.8152	62.4782	3.85668	1.59244
RUES-GLR RefChem2 P2 2021-01-25	I	24	6	Lenalidomide	0.003	4985	706.018	688.487	381.163	444.362	312.235	291.924	90.4525	51.3276	241.996	245.509	43.7183	38.5669	70.672	2.5677	0.341023
RUES-GLR RefChem2 P2 2021-01-25	J	1	6	ATRA	100	1484	306.07	299.591	75.5159	84.7817	561.007	529.442	223.436	239.538	655.506	645.313	233.342	240.466	6.26685	44.2722	79.5822
RUES-GLR RefChem2 P2 2021-01-25	J	2	6	ATRA	24.3	1315	318.611	316.69	68.3624	72.3583	588.796	567.282	209.74	211.155	644.323	626.345	220.908	227.723	6.1597	51.4068	79.4677
RUES-GLR RefChem2 P2 2021-01-25	J	3	6	ATRA	5.93	3175	247.158	246.324	42.708	35.4104	346.969	314.383	140.332	76.2219	295.933	284.701	94.5492	54.6724	0.944882	4.72441	4.66142
RUES-GLR RefChem2 P2 2021-01-25	J	4	6	ATRA	1.44	3182	246.143	237.935	60.966	33.7165	294.319	267.283	123.051	50.6293	247.783	240.844	76.1126	39.9739	2.13702	3.07982	1.63419
RUES-GLR RefChem2 P2 2021-01-25	J	5	6	ATRA	0.351	4889	278.443	235.658	129.251	44.438	284.395	262.31	85.7066	45.5811	234.935	236.759	44.1425	36.171	10.8407	1.82041	0.490898
RUES-GLR RefChem2 P2 2021-01-25	J	6	6	ATRA	0.0855	4493	484.338	348.256	311.55	185.928	322.263	288.142	121.317	59.3752	244.505	242.754	58.1831	40.6514	42.8889	5.0523	0.667705
RUES-GLR RefChem2 P2 2021-01-25	J	7	6	ATRA	0.0208	4188	602.768	499.239	400.052	382.05	316.997	283.558	120.192	52.5982	242.645	240.283	137.083	36.5342	55.086	4.32187	0.811843
RUES-GLR RefChem2 P2 2021-01-25	J	8	6	ATRA	0.00506	4524	624.837	571.561	368.215	436.16	310.24	283.39	106.321	51.1134	242.001	241.859	49.4124	37.9004	61.4943	3.75774	0.66313
RUES-GLR RefChem2 P2 2021-01-25	J	9	6	ATRA	0.00123	4861	724.157	674.929	412.593	496.417	310.933	285.982	118.701	49.4447	246.871	246.323	78.81	38.4542	69.9239	3.47665	0.720016
RUES-GLR RefChem2 P2 2021-01-25	J	10	6	ATRA	0.0003	5093	726.289	696.54	412.532	483.639	322.345	297.258	116.841	52.2424	251.816	250.701	59.9012	40.1221	69.8606	3.71098	0.805026
RUES-GLR RefChem2 P2 2021-01-25	J	11	6	DEControl		4667	755.148	736.588	386.1	414.508	308.396	285.097	109.011	48.481	248.219	247.272	59.7586	38.2733	76.4088	3.02121	0.921363
RUES-GLR RefChem2 P2 2021-01-25	J	12	6	DMSOControl		5350	755.658	750.899	376.893	406.384	302.721	283.522	98.9866	43.0955	247.941	248.028	52.0207	38.4186	76.1682	2.93458	0.785047
RUES-GLR RefChem2 P2 2021-01-25	J	13	6	SB431542		5134	325.626	255.862	214.215	41.1837	318.654	287.634	112.462	52.1734	261.841	260.899	55.9705	41.9539	14.4721	4.03194	0.954421
RUES-GLR RefChem2 P2 2021-01-25	J	15	6	Pomalidomide	100	3748	316.71	257.009	176.064	45.1222	290.06	269.185	93.0574	41.2066	396.884	394.988	75.384	67.5613	14.5678	2.21451	19.6105
RUES-GLR RefChem2 P2 2021-01-25	J	16	6	Pomalidomide	24.3	4900	326.537	264.916	175.456	49.0755	294.247	277.218	86.202	38.1436	297.16	299.131	50.3865	48.9747	16.0408	2.53061	0.653061
RUES-GLR RefChem2 P2 2021-01-25	J	17	6	Pomalidomide	5.93	4487	345.261	265.989	200.104	58.4263	291.146	269.588	93.7812	36.6914	254.695	255.429	47.2946	39.1258	19.8574	2.98641	0.245153
RUES-GLR RefChem2 P2 2021-01-25	J	18	6	Pomalidomide	14.4	4061	353.079	261.236	246.223	54.4663	284.045	263.675	97.2425	38.1725	263.91	264.79	55.1026	40.2467	18.7146	2.63482	0.911106
RUES-GLR RefChem2 P2 2021-01-25	J	19	6	Pomalidomide	0.351	4488	449.667	278.942	368.866	83.1939	285.982	266.542	99.4038	40.2459	246.29	246.718	51.0613	38.8671	28.8102	2.45098	0.557041
RUES-GLR RefChem2 P2 2021-01-25	J	20	6	Pomalidomide	8.55	3962	329.615	256.992	192.365	51.1378	284.858	263.908	100.752	42.1614	259.754	256.726	59.4033	41.8234	17.5416	2.57446	1.21151
RUES-GLR RefChem2 P2 2021-01-25	J	21	6	Pomalidomide	2.08	3335	300.19	248.299	159.664	45.1882	286.87	259.757	114.287	39.9872	246.832	244.443	66.0956	38.1829	12.6237	3.14843	1.16942
RUES-GLR RefChem2 P2 2021-01-25	J	22	6	Pomalidomide	0.506	3943	397.886	271.469	289.608	79.9937	280.057	258.34	102.739	37.2444	239.695	238.56	59.9052	34.5075	25.336	2.51078	0.887649
RUES-GLR RefChem2 P2 2021-01-25	J	23	6	Pomalidomide	0.0123	3625	557.247	480.237	337.556	343.751	285.182	266.102	92.5726	41.5499	236.833	237.236	48.0697	37.1629	54.4276	2.04138	0.717241
RUES-GLR RefChem2 P2 2021-01-25	J	24	6	Pomalidomide	0.003	4819	624.602	565.355	365.587	432.485	295.82	271.3	98.8228	47.2727	237.201	237.468	46.3772	34.6024	62.3781	2.82216	0.643287
RUES-GLR RefChem2 P2 2021-01-25	K	1	6	Caffeine	100	5523	1101.81	1085.6	635.977	683.834	303.5	282.241	97.9263	48.5463	239.127	239.799	48.285	37.3511	80.6446	2.57107	0.506971
[truncated: 2,441 more rows]
