# Supplementary material for: The DevTox Germ Layer Reporter Platform: An Assay Adaptation of the Human Pluripotent Stem Cell Test
Source: Toxics. 2022 Jul 13;10(7):392. doi: 10.3390/toxics10070392 (PMC9321663; doi:10.3390/toxics10070392)
Supplement: Supplementary file 1 [file toxics-10-00392-s001.zip › Gamble_DevTox GLR_Tables_v1.xlsx]

## Sheet: Table 1 Ref Chem
Chemical	CASRN	DTXSID	Developmental Toxicant Classification	FDA Pregnacy Category	IC50 (µM)	% Max Inhibition
All-Trans Retinoic Acid	302-79-4	DTXSID7021239	Positive	X	0.16	93
Lenalidomide	191732-72-6	DTXSID8046664	Positive	X	0.13	44
Pomalidomide	19171-19-8	DTXSID40893458	Positive	X	0.05	81
Thalidomide	50-35-1	DTXSID9022524	Positive	X	1.71	58
Aspirin	50-78-2	DTXSID5020108	Negative	C	-	-
Caffeine	58-08-2	DTXSID0020232	Negative	B	-	-
Folic Acid	59-30-3	DTXSID0022519	Negative	A	-	-
Saccharin	81-07-2	DTXSID5021251	Negative	A	-	-

## Sheet: Table 2 AEIDs
Assay Endpoint ID (AEID)	Assay Endpoint Name	Interpretation
3093	CCTE_Deisenroth_DEVTOX_RUES2-GLR_Endo_Sox17_up	SOX17 positive
3094	CCTE_Deisenroth_DEVTOX_RUES2-GLR_Endo_Sox17_dn	SOX17 negative
3095	CCTE_Deisenroth_DEVTOX_RUES2-GLR_Endo_Sox2_up	SOX2 positive
3096	CCTE_Deisenroth_DEVTOX_RUES2-GLR_Endo_Bra_up	BRA positive
3097	CCTE_Deisenroth_DEVTOX_RUES2-GLR_Endo_	Cell count positive
	CellCount_up
3098	CCTE_Deisenroth_DEVTOX_RUES2-GLR_Endo_	Cell count negative
	CellCount_dn

## Sheet: Table 2 hPST comparison
		DT Class.	hPST				DevTox-GLR Endo
CASRN	Chemical Name		TC50 (µM)	IC50 (µM)	Call		CC50 (µM)	AC50 (µM)	Call
50-76-0	Actinomycin D	Pos	< 0.01	< 0.01	TP		0.00048398	3.65607e-05	TP
25316-40-9	Doxorubicin	Pos	< 0.3	0.3	TP		0.00328084	0.00187145	TP
302-79-4	All-Trans-Retinoic Acid	Pos	33	0.07	TP		5.52671	0.101199	TP
4759-48-2	13-cis Retinoic acid	Pos	140	0.2	TP		10.2386	0.1559	TP
59-14-3	5-Bromo-2'-deoxyuridine	Pos	3.4	0.2	TP		9.37165	0.54868	TP
284461-73-0	Sorafenib	Pos	< 2	< 2	TP		0.611175	0.618601	TP
341031-54-7	Sunitinib	Pos	3.6	2.8	TP		1.25953	0.628256	TP
56-53-1	Diethylstilbestrol	Pos	4.4	4.4	TP		0.713616	0.644466	TP
302962-49-8	Dasatinib	Pos	< 1	< 1	TP		0.0519016	0.72181	TP
50-35-1	Thalidomide	Pos	> 200	0.5	TP		> 200	1.64311	TP
146939-27-7	Ziprasidone	Pos	5.1	2.8	TP		2.41899	3.56643	TP
443913-73-3	Vandetanib	Pos	4.4	3.5	TP		4.32117	4.90395	TP
184475-35-2	Gefitinib	Pos	10	10	TP		6.59623	5.74988	TP
51-21-8	5-Fluorouracil	Pos	0.7	0.6	TP		5.71675	8.48279	TP
87051-43-2	Ritanserin	Pos	27	7.3	TP		9.47237	9.98421	TP
220127-57-1	Imatinib	Pos	22	11	TP		13.4059	13.4464	TP
329-89-5	6-Aminonicotinamide	Pos	8	7	TP		23.8451	16.6073	TP
866405-64-3	Dorsomorphin	Pos	2.4	0.3	TP		16.6876	17.0554	TP
21535-47-7	Mianserin	Pos	60	3.4	TP		33.5604	34.8475	TP
298-46-4	Carbamazepine	Pos	0.19	0.08	TP		136.802	102.725	TP
99-66-1	Valproic Acid	Pos	3.3	2.6	TP		> 200	123.933	TP
59277-89-3	Acyclovir	Neg	> 200	> 200	TN		> 200	> 200	TN
50-78-2	Aspirin	Neg	> 200	> 200	TN		> 200	> 200	TN
58-08-2	Caffeine	Neg	> 400	> 400	TN		> 200	> 200	TN
59-30-3	Folic Acid	Neg	84	39	TN		> 200	> 200	TN
59-67-6	Niacin	Neg	> 200	> 200	TN		> 200	> 200	TN
113-98-4	Penicillin G	Neg	> 400	> 400	TN		> 200	> 200	TN
81-07-2	Saccharin	Neg	> 400	> 400	TN		> 200	> 200	TN
189188-57-6	Tegaserod maleate	Neg	4.5	4.6	FP		5.0618	5.32336	FP
668985-31-7	Esomeprazole	Neg	101	32	TN		38.5352	33.7972	FP
74050-98-9	Ketanserin	Neg	> 200	> 200	TN		57.4601	36.6224	FP
154-23-4	Cianidanol	Neg	200	97	TN		193.553	92.8695	FP
41372-08-1	Methyldopa	Neg	462	272	TN		> 200	113.054	FP
15687-27-1	Ibuprofen	Neg	> 200	> 200	TN		79.4377	161.78	FP
			Sensitivity		1				1
			Specificity		0.923				0.538462
			Balanced Accuracy		0.9615				0.769231

## Sheet: Table 3 quickPredict comparison
		DT Class.	quickPredict				DevTox-GLR Endo
CASRN	Chemical Name		CV (µM)	TI (µM)	Call		CC (µM)	ACC (µM)	Call
302-79-4	All-Trans-Retinoic Acid	Pos	NA	0.003	TP		3.83877	0.0416607	TP
50-35-1	Thalidomide	Pos	NA	1.27	TP		NA	0.25232	TP
69-74-9	Cytarabine	Pos	0.083	0.054	TP		0.052307	0.455711	TP
56-53-1	Diethylstilbestrol	Pos	NA	NA	FN		0.595907	0.535851	TP
75330-75-5	Lovastatin	Pos	NA	5.1	TP		0.714479	0.93447	TP
51-21-8	5-Fluorouracil	Pos	1.45	2.02	TP		20.3443	7.07097	TP
53-86-1	Indomethacin	Pos	44.1	72.7	TP		8.70152	9.38454	TP
19774-82-4	Amiodarone	Pos	NA	5.1	TP		11.1419	14.2236	TP
147-24-0	Diphenhydramine	Pos	3.76	0.588	TP		14.3414	16.778	TP
55-98-1	Busulfan	Pos	4.91	2.31	TP		5.79486	25.262	TP
80-05-7	Bisphenol A	Pos	39.4	NA	FN		21.1157	31.7467	TP
13292-46-1	Rifampicin	Pos	NA	2.46	TP		18.1066	37.8542	TP
298-46-4	Carbamazepine	Pos	NA	2.29	TP		57.7753	64.024	TP
4376-20-9	MEHP	Pos	NA	167	TP		61.5464	76.3285	TP
81-81-2	Warfarin	Pos	NA	NA	FN		197.749	93.3273	TP
99-66-1	Valproic Acid	Pos	271	155	TP		NA	177.332	TP
57-41-0	5,5-Diphenylhydantoin	Pos	NA	NA	FN		191.824	201.562	TP
57-55-6	1,2-Propylene glycol	Neg	246664	327552	TN		NA	NA	TN
103-90-2	Acetaminophen	Neg	NA*	NA	TN		NA	NA	TN
79-06-1	Acrylamide	Neg	NA	NA	TN		NA	NA	TN
50-78-2	Aspirin	Neg	NA*	NA	TN		NA	NA	TN
58-08-2	Caffeine	Neg	NA	NA	TN		NA	NA	TN
464-49-3	D-Camphor	Neg	NA	NA	TN		NA	NA	TN
131-11-3	Dimethyl phthalate	Neg	NA	NA	TN		NA	NA	TN
59-30-3	Folic Acid	Neg	NA	NA	TN		NA	NA	TN
54-85-3	Isoniazid	Neg	NA*	NA	TN		NA	NA	TN
81-07-2	Saccharin	Neg	NA	NA	TN		NA	NA	TN
69-72-7	Salicylic acid	Neg	1795	513	TN		NA	NA	TN
599-79-1	Sulfasalazine	Neg	NA*	NA	TN		NA	NA	TN
68-26-8	Retinol	Neg	NA	NA	TN		12.6287	13.0451	FP
94-26-8	Butylparaben	Neg	NA	NA	TN		NA	34.4685	FP
51-52-5	6-Propyl-2-thiouracil	Pos	NA	NA	FN		NA	NA	FN
10043-35-3	Boric acid	Pos	NA	NA	FN		NA	NA	FN
4449-51-8	Cyclopamine	Pos	NA	NA	FN		NA	NA	FN
6055-19-2	Cyclophosphamide	Pos	NA*	NA	FN		100.193	NA	FN
2392-39-4	Dexamethasone	Pos	21.8	37.7	TP		13.83	NA	FN
107-21-1	Ethylene glycol	Pos	NA	NA	FN		NA	NA	FN
127-07-1	Hydroxyurea	Pos	237	74.9	TP		64.5432	NA	FN
133073-73-1	Methotrexate	Pos	0.062	0.059	TP		0.34741	NA	FN
3056-17-5	Stavudine	Pos	NA	32.5	TP		90.2805	NA	FN
			Sensitivity		0.653846				0.653846
			Specificity		1				0.857
			Balanced Accuracy		0.826923				0.755423
